# Supplementary material for: Pathogenic taxa constitute a substantial portion of bat and wild bird fecal bacterial microbiota
Source: Research Square preprint supplement (doi:10.21203/rs.3.rs-3619162/v1), 2023-11-28
Supplement: Supplementary file 1 [file 62f07edda129d9c5b4d92fdb.xlsx]

## Sheet: 1_sample_number
Bird samples
Species	Country	Year	No. of samples	No. of samples used for PacBio sequencing
Black bird	Denmark	2020	29	20
	Finland	2020	43	24
	Latvia	2020	48	14
	Finland	2021	24	12
	France	2021	21	11
Mallard	France	2020	32	22
	Finland	2021	63	53
	France	2021	40	32
Wood pigeon	Finland	2021	80	62
	France	2021	38	13
Total			418	263
Bat samples
Species	Country	Year	No. of samples	No. of samples used for PacBio sequencing
Nathusius pipistrelle	Latvia	2020	114	41
	Finland	2020	21	21
	Poland	2020	3	3
	Finland	2021	23	23
Total			161	88

## Sheet: 2_samples_raw_reads
Sample_ID	Fastq filename	Total Reads
24_4	NA	0
A7_Oittila_wood	NA	0
10A_Petaajavesi_wood	10A_Petaajavesi_wood-16S_For_bc1004-16S_Rev_bc1075.fastq.gz	133
B4_Oittila_wood	B4_Oittila_wood-16S_For_bc1004-16S_Rev_bc1056.fastq.gz	141
7_Outines_Mallard	7_Outines_Mallard-16S_For_bc1022-16S_Rev_bc1045.fastq.gz	639
C1_Lappajarvikk_wood	C1_Lappajarvikk_wood-16S_For_bc1006-16S_Rev_bc1054.fastq.gz	1117
A3_Oittila_wood	A3_Oittila_wood-16S_For_bc1004-16S_Rev_bc1033.fastq.gz	1172
12A_Sauvo_Mallard	12A_Sauvo_Mallard-16S_For_bc1022-16S_Rev_bc1044.fastq.gz	1240
11A_Sauvo_Mallard	11A_Sauvo_Mallard-16S_For_bc1022-16S_Rev_bc1035.fastq.gz	1458
C1_Oittila_wood	C1_Oittila_wood-16S_For_bc1004-16S_Rev_bc1060.fastq.gz	1477
1A_Kuopio_Mallard	1A_Kuopio_Mallard-16S_For_bc1015-16S_Rev_bc1059.fastq.gz	1580
1_vantaa	1_vantaa-16S_For_bc1081-16S_Rev_bc1033.fastq.gz	1652
21_Saintes_Mallard	21_Saintes_Mallard-16S_For_bc1024-16S_Rev_bc1044.fastq.gz	1770
1A_Kuortane_wood	1A_Kuortane_wood-16S_For_bc1006-16S_Rev_bc1060.fastq.gz	1842
1A_1_Petaajavesi_wood	1A_1_Petaajavesi_wood-16S_For_bc1004-16S_Rev_bc1062.fastq.gz	2070
8A85324	8A85324-16S_For_bc1004-16S_Rev_bc1045.fastq.gz	2163
A9_Oittila_wood	A9_Oittila_wood-16S_For_bc1004-16S_Rev_bc1045.fastq.gz	2183
22_Saintes_Mallard	22_Saintes_Mallard-16S_For_bc1024-16S_Rev_bc1035.fastq.gz	2207
A1_Oittila_wood	A1_Oittila_wood-16S_For_bc1003-16S_Rev_bc1075.fastq.gz	2248
F8_Luhanka_Mallard	F8_Luhanka_Mallard-16S_For_bc1012-16S_Rev_bc1045.fastq.gz	2280
62_Oye_Mallard	62_Oye_Mallard-16S_For_bc1007-16S_Rev_bc1045.fastq.gz	2389
7A_Keuruu_wood	7A_Keuruu_wood-16S_For_bc1009-16S_Rev_bc1057.fastq.gz	2518
A5_Oittila_wood	A5_Oittila_wood-16S_For_bc1004-16S_Rev_bc1035.fastq.gz	2648
2A_Keuruu_wood	2A_Keuruu_wood-16S_For_bc1009-16S_Rev_bc1035.fastq.gz	2732
5_Arrigny_Mallard	5_Arrigny_Mallard-16S_For_bc1005-16S_Rev_bc1054.fastq.gz	2766
5A_Petaajavesi_Mallard	5A_Petaajavesi_Mallard-16S_For_bc1015-16S_Rev_bc1044.fastq.gz	2811
7A_Kuopio_Mallard	7A_Kuopio_Mallard-16S_For_bc1020-16S_Rev_bc1035.fastq.gz	2828
3A_Petaajavesi_Mallard	3A_Petaajavesi_Mallard-16S_For_bc1015-16S_Rev_bc1033.fastq.gz	2935
6A_Petaajavesi_Mallard	6A_Petaajavesi_Mallard-16S_For_bc1015-16S_Rev_bc1045.fastq.gz	3090
8A_Kuopio_Mallard	8A_Kuopio_Mallard-16S_For_bc1020-16S_Rev_bc1044.fastq.gz	3098
7A_Twsnievi_Mallard	7A_Twsnievi_Mallard-16S_For_bc1008-16S_Rev_bc1044.fastq.gz	3168
9_denmark	9_denmark-16S_For_bc1009-16S_Rev_bc1035.fastq.gz	3199
7A_Petaajavesi_Mallard	7A_Petaajavesi_Mallard-16S_For_bc1015-16S_Rev_bc1054.fastq.gz	3252
9_Outines_Mallard	9_Outines_Mallard-16S_For_bc1022-16S_Rev_bc1056.fastq.gz	3266
4A_Petaajavesi_Mallard	4A_Petaajavesi_Mallard-16S_For_bc1015-16S_Rev_bc1035.fastq.gz	3331
18_Outines_Mallard	18_Outines_Mallard-16S_For_bc1024-16S_Rev_bc1033.fastq.gz	3359
2_Arrigny_Mallard	2_Arrigny_Mallard-16S_For_bc1005-16S_Rev_bc1035.fastq.gz	3397
E5_Luhanka_Mallard	E5_Luhanka_Mallard-16S_For_bc1008-16S_Rev_bc1062.fastq.gz	3404
A781158	A781158-16S_For_bc1003-16S_Rev_bc1057.fastq.gz	3427
11A_Vilppula_wood	11A_Vilppula_wood-16S_For_bc1003-16S_Rev_bc1033.fastq.gz	3462
3_Arrigny_Mallard	3_Arrigny_Mallard-16S_For_bc1005-16S_Rev_bc1044.fastq.gz	3612
F2_Luhanka_Mallard	F2_Luhanka_Mallard-16S_For_bc1012-16S_Rev_bc1033.fastq.gz	3724
30_Saintes_Mallard	30_Saintes_Mallard-16S_For_bc1024-16S_Rev_bc1054.fastq.gz	3746
7A_Twsnievi_wood	7A_Twsnievi_wood-16S_For_bc1003-16S_Rev_bc1065.fastq.gz	3889
6A_Kuopio_Mallard	6A_Kuopio_Mallard-16S_For_bc1020-16S_Rev_bc1033.fastq.gz	3955
10A_Kuopio_Mallard	10A_Kuopio_Mallard-16S_For_bc1020-16S_Rev_bc1054.fastq.gz	3992
3A_Kuortane_wood	3A_Kuortane_wood-16S_For_bc1006-16S_Rev_bc1065.fastq.gz	4030
2A_Sauvo_Mallard	2A_Sauvo_Mallard-16S_For_bc1020-16S_Rev_bc1057.fastq.gz	4089
6A_Twsnievi_Mallard	6A_Twsnievi_Mallard-16S_For_bc1008-16S_Rev_bc1035.fastq.gz	4197
5A_kronoby_wood	5A_kronoby_wood-16S_For_bc1002-16S_Rev_bc1035.fastq.gz	4212
20_Saintes_Mallard	20_Saintes_Mallard-16S_For_bc1024-16S_Rev_bc1045.fastq.gz	4348
19_vantaa	19_vantaa-16S_For_bc1081-16S_Rev_bc1075.fastq.gz	4365
8A85322	8A85322-16S_For_bc1004-16S_Rev_bc1033.fastq.gz	4367
3A_Kuopio_Mallard	3A_Kuopio_Mallard-16S_For_bc1015-16S_Rev_bc1062.fastq.gz	4421
1A_Vassor_Mallard	1A_Vassor_Mallard-16S_For_bc1012-16S_Rev_bc1056.fastq.gz	4486
8A_Twsnievi_Mallard	8A_Twsnievi_Mallard-16S_For_bc1008-16S_Rev_bc1045.fastq.gz	4497
10A_Twsnievi_Mallard	10A_Twsnievi_Mallard-16S_For_bc1008-16S_Rev_bc1056.fastq.gz	4655
B8_Lappajarvikk_wood	B8_Lappajarvikk_wood-16S_For_bc1006-16S_Rev_bc1045.fastq.gz	4707
6_Arrigny_Mallard	6_Arrigny_Mallard-16S_For_bc1005-16S_Rev_bc1056.fastq.gz	4717
5A_Kuortane_wood	5A_Kuortane_wood-16S_For_bc1010-16S_Rev_bc1033.fastq.gz	4766
5A_Twsnievi_Mallard	5A_Twsnievi_Mallard-16S_For_bc1008-16S_Rev_bc1033.fastq.gz	4782
3_denmark	3_denmark-16S_For_bc1004-16S_Rev_bc1062.fastq.gz	4797
2A_Twsnievi_wood	2A_Twsnievi_wood-16S_For_bc1003-16S_Rev_bc1056.fastq.gz	4863
8_Outines_Mallard	8_Outines_Mallard-16S_For_bc1022-16S_Rev_bc1054.fastq.gz	4865
9A_Petaajavesi_Mallard	9A_Petaajavesi_Mallard-16S_For_bc1015-16S_Rev_bc1057.fastq.gz	4895
VD_01	VD_01-16S_For_bc1004-16S_Rev_bc1044.fastq.gz	4895
61_Oye_Mallard	61_Oye_Mallard-16S_For_bc1007-16S_Rev_bc1044.fastq.gz	5003
12_denmark	12_denmark-16S_For_bc1009-16S_Rev_bc1045.fastq.gz	5025
8A_Petaajavesi_Mallard	8A_Petaajavesi_Mallard-16S_For_bc1015-16S_Rev_bc1056.fastq.gz	5042
A686078	A686078-16S_For_bc1002-16S_Rev_bc1035.fastq.gz	5051
17_1	17_1-16S_For_bc1015-16S_Rev_bc1054.fastq.gz	5157
3551	3551-16S_For_bc1005-16S_Rev_bc1033.fastq.gz	5182
E7_Luhanka_Mallard	E7_Luhanka_Mallard-16S_For_bc1008-16S_Rev_bc1065.fastq.gz	5185
11A_Twsnievi_Mallard	11A_Twsnievi_Mallard-16S_For_bc1008-16S_Rev_bc1057.fastq.gz	5189
5A_Twsnievi_wood	5A_Twsnievi_wood-16S_For_bc1003-16S_Rev_bc1060.fastq.gz	5214
4_Arrigny_Mallard	4_Arrigny_Mallard-16S_For_bc1005-16S_Rev_bc1045.fastq.gz	5277
29_Saintes_Mallard	29_Saintes_Mallard-16S_For_bc1007-16S_Rev_bc1035.fastq.gz	5286
28_Saintes_Mallard	28_Saintes_Mallard-16S_For_bc1007-16S_Rev_bc1033.fastq.gz	5323
E9_Luhanka_Mallard	E9_Luhanka_Mallard-16S_For_bc1008-16S_Rev_bc1075.fastq.gz	5356
2A_Kuopio_Mallard	2A_Kuopio_Mallard-16S_For_bc1015-16S_Rev_bc1060.fastq.gz	5419
38_Saintes_Mallard	38_Saintes_Mallard-16S_For_bc1024-16S_Rev_bc1065.fastq.gz	5422
3AVassor_Mallard	3AVassor_Mallard-16S_For_bc1012-16S_Rev_bc1059.fastq.gz	5478
2AVassor_Mallard	2AVassor_Mallard-16S_For_bc1012-16S_Rev_bc1057.fastq.gz	5493
19_3	19_3-16S_For_bc1020-16S_Rev_bc1044.fastq.gz	5617
E3_Luhanka_Mallard	E3_Luhanka_Mallard-16S_For_bc1008-16S_Rev_bc1060.fastq.gz	5628
11_denmark	11_denmark-16S_For_bc1009-16S_Rev_bc1044.fastq.gz	5644
19_2	19_2-16S_For_bc1020-16S_Rev_bc1035.fastq.gz	5678
G1_Luhanka_Mallard	G1_Luhanka_Mallard-16S_For_bc1012-16S_Rev_bc1054.fastq.gz	5740
6AVassor_Mallard	6AVassor_Mallard-16S_For_bc1012-16S_Rev_bc1065.fastq.gz	5764
65_Oye_Mallard	65_Oye_Mallard-16S_For_bc1007-16S_Rev_bc1057.fastq.gz	5798
34_Saintes_Mallard	34_Saintes_Mallard-16S_For_bc1024-16S_Rev_bc1059.fastq.gz	5800
9A_Twsnievi_Mallard	9A_Twsnievi_Mallard-16S_For_bc1008-16S_Rev_bc1054.fastq.gz	5810
6A_Sauvo_Mallard	6A_Sauvo_Mallard-16S_For_bc1020-16S_Rev_bc1062.fastq.gz	5865
E1_Luhanka_Mallard	E1_Luhanka_Mallard-16S_For_bc1008-16S_Rev_bc1059.fastq.gz	5981
A810984	A810984-16S_For_bc1003-16S_Rev_bc1044.fastq.gz	5994
B2_Oittila_wood	B2_Oittila_wood-16S_For_bc1004-16S_Rev_bc1054.fastq.gz	6105
B8_Oittila_wood	B8_Oittila_wood-16S_For_bc1004-16S_Rev_bc1059.fastq.gz	6107
42_Saintes_Mallard	42_Saintes_Mallard-16S_For_bc1081-16S_Rev_bc1035.fastq.gz	6172
8_denmark	8_denmark-16S_For_bc1009-16S_Rev_bc1033.fastq.gz	6192
D25	D25-16S_For_bc1010-16S_Rev_bc1057.fastq.gz	6220
BA05557F	BA05557F-16S_For_bc1012-16S_Rev_bc1044.fastq.gz	6245
13A_Vilppula_wood	13A_Vilppula_wood-16S_For_bc1003-16S_Rev_bc1035.fastq.gz	6315
3552	3552-16S_For_bc1005-16S_Rev_bc1035.fastq.gz	6364
10_chize	10_chize-16S_For_bc1010-16S_Rev_bc1035.fastq.gz	6392
BA05554F	BA05554F-16S_For_bc1012-16S_Rev_bc1035.fastq.gz	6498
96	96-16S_For_bc1024-16S_Rev_bc1044.fastq.gz	6516
17_Outines_Mallard	17_Outines_Mallard-16S_For_bc1022-16S_Rev_bc1075.fastq.gz	6520
3554	3554-16S_For_bc1005-16S_Rev_bc1044.fastq.gz	6564
67_Oye_Mallard	67_Oye_Mallard-16S_For_bc1007-16S_Rev_bc1060.fastq.gz	6581
1A_2_Petaajavesi_wood	1A_2_Petaajavesi_wood-16S_For_bc1009-16S_Rev_bc1033.fastq.gz	6592
37_Saintes_Mallard	37_Saintes_Mallard-16S_For_bc1024-16S_Rev_bc1062.fastq.gz	6617
A810982	A810982-16S_For_bc1003-16S_Rev_bc1033.fastq.gz	6632
19_1	19_1-16S_For_bc1020-16S_Rev_bc1033.fastq.gz	6704
24_1	24_1-16S_For_bc1022-16S_Rev_bc1033.fastq.gz	6704
11_Outines_Mallard	11_Outines_Mallard-16S_For_bc1022-16S_Rev_bc1057.fastq.gz	6888
19_Saintes_Mallard	19_Saintes_Mallard-16S_For_bc1005-16S_Rev_bc1057.fastq.gz	7028
5A_Kuopio_Mallard	5A_Kuopio_Mallard-16S_For_bc1015-16S_Rev_bc1075.fastq.gz	7072
7_vantaa	7_vantaa-16S_For_bc1081-16S_Rev_bc1054.fastq.gz	7103
14A_Vilppula_wood	14A_Vilppula_wood-16S_For_bc1003-16S_Rev_bc1044.fastq.gz	7122
63_Oye_Mallard	63_Oye_Mallard-16S_For_bc1007-16S_Rev_bc1054.fastq.gz	7173
4A_kronoby_wood	4A_kronoby_wood-16S_For_bc1002-16S_Rev_bc1033.fastq.gz	7187
8E13246	8E13246-16S_For_bc1004-16S_Rev_bc1035.fastq.gz	7191
26_Saintes_Mallard	26_Saintes_Mallard-16S_For_bc1005-16S_Rev_bc1065.fastq.gz	7198
12_Outines_Mallard	12_Outines_Mallard-16S_For_bc1022-16S_Rev_bc1059.fastq.gz	7199
7AVassor_Mallard	7AVassor_Mallard-16S_For_bc1012-16S_Rev_bc1075.fastq.gz	7224
BA05553F	BA05553F-16S_For_bc1012-16S_Rev_bc1033.fastq.gz	7224
1_Arrigny_Mallard	1_Arrigny_Mallard-16S_For_bc1005-16S_Rev_bc1033.fastq.gz	7384
B6_Oittila_wood	B6_Oittila_wood-16S_For_bc1004-16S_Rev_bc1057.fastq.gz	7394
2_vantaa	2_vantaa-16S_For_bc1081-16S_Rev_bc1035.fastq.gz	7436
99	99-16S_For_bc1024-16S_Rev_bc1045.fastq.gz	7438
64_Oye_Mallard	64_Oye_Mallard-16S_For_bc1007-16S_Rev_bc1056.fastq.gz	7445
40_Saintes_Mallard	40_Saintes_Mallard-16S_For_bc1024-16S_Rev_bc1075.fastq.gz	7503
6A_Twsnievi_wood	6A_Twsnievi_wood-16S_For_bc1003-16S_Rev_bc1062.fastq.gz	7539
B4_Lappajarvikk_wood	B4_Lappajarvikk_wood-16S_For_bc1006-16S_Rev_bc1035.fastq.gz	7542
A810987	A810987-16S_For_bc1003-16S_Rev_bc1054.fastq.gz	7567
9A_Kuopio_Mallard	9A_Kuopio_Mallard-16S_For_bc1020-16S_Rev_bc1045.fastq.gz	7601
14_denmark	14_denmark-16S_For_bc1009-16S_Rev_bc1056.fastq.gz	7603
5563F	5563F-16S_For_bc1012-16S_Rev_bc1056.fastq.gz	7675
14_chize	14_chize-16S_For_bc1010-16S_Rev_bc1044.fastq.gz	7707
5568F	5568F-16S_For_bc1008-16S_Rev_bc1033.fastq.gz	7753
D23_Chize_wood	D23_Chize_wood-16S_For_bc1010-16S_Rev_bc1065.fastq.gz	7757
15A_Vilppula_wood	15A_Vilppula_wood-16S_For_bc1003-16S_Rev_bc1045.fastq.gz	7781
25_Saintes_Mallard	25_Saintes_Mallard-16S_For_bc1005-16S_Rev_bc1062.fastq.gz	7793
3A_Twsnievi_wood	3A_Twsnievi_wood-16S_For_bc1003-16S_Rev_bc1057.fastq.gz	7868
4A_Kuopio_Mallard	4A_Kuopio_Mallard-16S_For_bc1015-16S_Rev_bc1065.fastq.gz	7874
F4_Luhanka_Mallard	F4_Luhanka_Mallard-16S_For_bc1012-16S_Rev_bc1035.fastq.gz	7895
BA05155	BA05155-16S_For_bc1007-16S_Rev_bc1035.fastq.gz	7898
46_Saintes_Mallard	46_Saintes_Mallard-16S_For_bc1081-16S_Rev_bc1054.fastq.gz	8015
2A_Petaajavesi_wood	2A_Petaajavesi_wood-16S_For_bc1004-16S_Rev_bc1065.fastq.gz	8024
BA05370	BA05370-16S_For_bc1007-16S_Rev_bc1044.fastq.gz	8063
5_vantaa	5_vantaa-16S_For_bc1081-16S_Rev_bc1044.fastq.gz	8075
A810983	A810983-16S_For_bc1003-16S_Rev_bc1035.fastq.gz	8093
66_Oye_Mallard	66_Oye_Mallard-16S_For_bc1007-16S_Rev_bc1059.fastq.gz	8110
2_denmark	2_denmark-16S_For_bc1004-16S_Rev_bc1060.fastq.gz	8115
6_vantaa	6_vantaa-16S_For_bc1081-16S_Rev_bc1045.fastq.gz	8138
1A_Twsnievi_Mallard	1A_Twsnievi_Mallard-16S_For_bc1007-16S_Rev_bc1065.fastq.gz	8140
LV18	LV18-16S_For_bc1006-16S_Rev_bc1035.fastq.gz	8198
41_Saintes_Mallard	41_Saintes_Mallard-16S_For_bc1081-16S_Rev_bc1033.fastq.gz	8284
3555	3555-16S_For_bc1005-16S_Rev_bc1045.fastq.gz	8485
16_3	16_3-16S_For_bc1015-16S_Rev_bc1044.fastq.gz	8494
D26	D26-16S_For_bc1010-16S_Rev_bc1059.fastq.gz	8501
1A_Sauvo_Mallard	1A_Sauvo_Mallard-16S_For_bc1020-16S_Rev_bc1056.fastq.gz	8507
68_Oye_Mallard	68_Oye_Mallard-16S_For_bc1007-16S_Rev_bc1062.fastq.gz	8509
A810991	A810991-16S_For_bc1003-16S_Rev_bc1060.fastq.gz	8510
J164F	J164F-16S_For_bc1012-16S_Rev_bc1054.fastq.gz	8576
5AVassor_Mallard	5AVassor_Mallard-16S_For_bc1012-16S_Rev_bc1062.fastq.gz	8596
1_denmark	1_denmark-16S_For_bc1004-16S_Rev_bc1059.fastq.gz	8608
11_vantaa	11_vantaa-16S_For_bc1081-16S_Rev_bc1059.fastq.gz	8643
A811018	A811018-16S_For_bc1003-16S_Rev_bc1075.fastq.gz	8664
45_Saintes_Mallard	45_Saintes_Mallard-16S_For_bc1081-16S_Rev_bc1045.fastq.gz	8728
5569F	5569F-16S_For_bc1008-16S_Rev_bc1035.fastq.gz	8745
5570F	5570F-16S_For_bc1008-16S_Rev_bc1044.fastq.gz	8786
20_10	20_1o-16S_For_bc1020-16S_Rev_bc1056.fastq.gz	8828
2_Chize_wood	2_Chize_wood-16S_For_bc1010-16S_Rev_bc1044.fastq.gz	8857
10A_Sauvo_Mallard	10A_Sauvo_Mallard-16S_For_bc1022-16S_Rev_bc1033.fastq.gz	8878
23_Saintes_Mallard	23_Saintes_Mallard-16S_For_bc1005-16S_Rev_bc1059.fastq.gz	8905
5A_Sauvo_Mallard	5A_Sauvo_Mallard-16S_For_bc1020-16S_Rev_bc1060.fastq.gz	8930
31_Saintes_Mallard	31_Saintes_Mallard-16S_For_bc1024-16S_Rev_bc1056.fastq.gz	8950
16_1	16_1-16S_For_bc1015-16S_Rev_bc1035.fastq.gz	9003
F6_Luhanka_Mallard	F6_Luhanka_Mallard-16S_For_bc1012-16S_Rev_bc1044.fastq.gz	9054
A686081	A686081-16S_For_bc1002-16S_Rev_bc1033.fastq.gz	9143
14_Outines_Mallard	14_Outines_Mallard-16S_For_bc1022-16S_Rev_bc1062.fastq.gz	9153
8A_Sauvo_Mallard	8A_Sauvo_Mallard-16S_For_bc1020-16S_Rev_bc1065.fastq.gz	9191
1_Chize_wood	1_Chize_wood-16S_For_bc1010-16S_Rev_bc1035.fastq.gz	9193
D27	D27-16S_For_bc1010-16S_Rev_bc1060.fastq.gz	9214
2A_Vilppula_wood	2A_Vilppula_wood-16S_For_bc1002-16S_Rev_bc1056.fastq.gz	9217
A686067	A686067-16S_For_bc1002-16S_Rev_bc1056.fastq.gz	9231
3A_Sauvo_Mallard	3A_Sauvo_Mallard-16S_For_bc1020-16S_Rev_bc1059.fastq.gz	9293
8A_kronoby_wood	8A_kronoby_wood-16S_For_bc1002-16S_Rev_bc1044.fastq.gz	9374
26_11	26_11-16S_For_bc1022-16S_Rev_bc1065.fastq.gz	9419
10A_Keuruu_wood	10A_Keuruu_wood-16S_For_bc1009-16S_Rev_bc1062.fastq.gz	9426
D10_Chize_wood	D10_Chize_wood-16S_For_bc1010-16S_Rev_bc1060.fastq.gz	9464
A686083	A686083-16S_For_bc1002-16S_Rev_bc1044.fastq.gz	9497
13_Outines_Mallard	13_Outines_Mallard-16S_For_bc1022-16S_Rev_bc1060.fastq.gz	9521
52601F	52601F-16S_For_bc1007-16S_Rev_bc1075.fastq.gz	9635
6A_Keuruu_wood	6A_Keuruu_wood-16S_For_bc1009-16S_Rev_bc1056.fastq.gz	9651
27_Saintes_Mallard	27_Saintes_Mallard-16S_For_bc1005-16S_Rev_bc1075.fastq.gz	9686
13_2	13_2-16S_For_bc1015-16S_Rev_bc1033.fastq.gz	9730
9_chize	9_chize-16S_For_bc1010-16S_Rev_bc1033.fastq.gz	9740
A686068	A686068-16S_For_bc1002-16S_Rev_bc1054.fastq.gz	9751
A810992	A810992-16S_For_bc1003-16S_Rev_bc1062.fastq.gz	9802
16_Outines_Mallard	16_Outines_Mallard-16S_For_bc1022-16S_Rev_bc1065.fastq.gz	9815
B2_Lappajarvikk_wood	B2_Lappajarvikk_wood-16S_For_bc1006-16S_Rev_bc1033.fastq.gz	9829
9A_Sauvo_Mallard	9A_Sauvo_Mallard-16S_For_bc1020-16S_Rev_bc1075.fastq.gz	9833
Staircase1	Staircase1-16S_For_bc1008-16S_Rev_bc1057.fastq.gz	9858
A810986	A810986-16S_For_bc1003-16S_Rev_bc1045.fastq.gz	9891
9A_kronoby_wood	9A_kronoby_wood-16S_For_bc1002-16S_Rev_bc1045.fastq.gz	9909
8A_Keuruu_wood	8A_Keuruu_wood-16S_For_bc1009-16S_Rev_bc1059.fastq.gz	9955
D7_Chize_wood	D7_Chize_wood-16S_For_bc1010-16S_Rev_bc1057.fastq.gz	9958
A809583	A809583-16S_For_bc1002-16S_Rev_bc1059.fastq.gz	10003
9A_Keuruu_wood	9A_Keuruu_wood-16S_For_bc1009-16S_Rev_bc1060.fastq.gz	10012
36_Saintes_Mallard	36_Saintes_Mallard-16S_For_bc1024-16S_Rev_bc1060.fastq.gz	10036
20_22	20_22-16S_For_bc1020-16S_Rev_bc1060.fastq.gz	10065
LV13	LV13-16S_For_bc1006-16S_Rev_bc1033.fastq.gz	10201
A810994	A810994-16S_For_bc1003-16S_Rev_bc1065.fastq.gz	10212
4550	4550-16S_For_bc1005-16S_Rev_bc1060.fastq.gz	10236
19_Chize_wood	19_Chize_wood-16S_For_bc1010-16S_Rev_bc1054.fastq.gz	10236
51_Saintes_Mallard	51_Saintes_Mallard-16S_For_bc1081-16S_Rev_bc1062.fastq.gz	10274
4A_Vilppula_wood	4A_Vilppula_wood-16S_For_bc1002-16S_Rev_bc1057.fastq.gz	10295
4AVassor_Mallard	4AVassor_Mallard-16S_For_bc1012-16S_Rev_bc1060.fastq.gz	10362
C5_Lappajarvikk_wood	C5_Lappajarvikk_wood-16S_For_bc1006-16S_Rev_bc1057.fastq.gz	10382
32_Saintes_Mallard	32_Saintes_Mallard-16S_For_bc1024-16S_Rev_bc1057.fastq.gz	10429
3560	3560-16S_For_bc1005-16S_Rev_bc1057.fastq.gz	10468
12_Chize_wood	12_Chize_wood-16S_For_bc1010-16S_Rev_bc1045.fastq.gz	10519
LV24	LV24-16S_For_bc1006-16S_Rev_bc1044.fastq.gz	10521
47_Saintes_Mallard	47_Saintes_Mallard-16S_For_bc1081-16S_Rev_bc1056.fastq.gz	10527
7A_Vilppula_wood	7A_Vilppula_wood-16S_For_bc1002-16S_Rev_bc1062.fastq.gz	10533
4A_Keuruu_wood	4A_Keuruu_wood-16S_For_bc1009-16S_Rev_bc1045.fastq.gz	10588
13_denmark	13_denmark-16S_For_bc1009-16S_Rev_bc1054.fastq.gz	10616
19_5	19_5-16S_For_bc1020-16S_Rev_bc1054.fastq.gz	10696
24_Saintes_Mallard	24_Saintes_Mallard-16S_For_bc1005-16S_Rev_bc1060.fastq.gz	10743
1A_Twsnievi_wood	1A_Twsnievi_wood-16S_For_bc1003-16S_Rev_bc1054.fastq.gz	10748
3A_Keuruu_wood	3A_Keuruu_wood-16S_For_bc1009-16S_Rev_bc1044.fastq.gz	10803
BA05372	BA05372-16S_For_bc1007-16S_Rev_bc1045.fastq.gz	10813
24_3	24_3-16S_For_bc1022-16S_Rev_bc1035.fastq.gz	10815
D15	D15-16S_For_bc1010-16S_Rev_bc1056.fastq.gz	10820
6_denmark	6_denmark-16S_For_bc1004-16S_Rev_bc1065.fastq.gz	10873
BA05377	BA05377-16S_For_bc1007-16S_Rev_bc1056.fastq.gz	10891
43_Saintes_Mallard	43_Saintes_Mallard-16S_For_bc1081-16S_Rev_bc1044.fastq.gz	10957
LV05	LV05-16S_For_bc1009-16S_Rev_bc1062.fastq.gz	10985
3558	3558-16S_For_bc1005-16S_Rev_bc1056.fastq.gz	11019
5572F	5572F-16S_For_bc1008-16S_Rev_bc1045.fastq.gz	11023
8_vantaa	8_vantaa-16S_For_bc1081-16S_Rev_bc1056.fastq.gz	11080
Staircase2	Staircase2-16S_For_bc1008-16S_Rev_bc1059.fastq.gz	11149
3557	3557-16S_For_bc1005-16S_Rev_bc1054.fastq.gz	11195
D9_Chize_wood	D9_Chize_wood-16S_For_bc1010-16S_Rev_bc1059.fastq.gz	11253
A809585	A809585-16S_For_bc1002-16S_Rev_bc1075.fastq.gz	11282
91	91-16S_For_bc1024-16S_Rev_bc1035.fastq.gz	11296
10A_kronoby_wood	10A_kronoby_wood-16S_For_bc1002-16S_Rev_bc1054.fastq.gz	11311
2A_Twsnievi_Mallard	2A_Twsnievi_Mallard-16S_For_bc1007-16S_Rev_bc1075.fastq.gz	11367
BA05133	BA05133-16S_For_bc1007-16S_Rev_bc1033.fastq.gz	11407
8A_Vilppula_wood	8A_Vilppula_wood-16S_For_bc1002-16S_Rev_bc1065.fastq.gz	11416
Staircase4	Staircase4-16S_For_bc1008-16S_Rev_bc1062.fastq.gz	11418
LV30	LV30-16S_For_bc1006-16S_Rev_bc1054.fastq.gz	11689
10_7	10_7-16S_For_bc1012-16S_Rev_bc1060.fastq.gz	11703
8A85329	8A85329-16S_For_bc1004-16S_Rev_bc1054.fastq.gz	11727
15_denmark	15_denmark-16S_For_bc1009-16S_Rev_bc1057.fastq.gz	11776
D2	D2-16S_For_bc1010-16S_Rev_bc1045.fastq.gz	11797
J167F	J167F-16S_For_bc1012-16S_Rev_bc1059.fastq.gz	11900
D13	D13-16S_For_bc1010-16S_Rev_bc1054.fastq.gz	11901
A7_Lappajarvikk_wood	A7_Lappajarvikk_wood-16S_For_bc1009-16S_Rev_bc1065.fastq.gz	11924
BA05373	BA05373-16S_For_bc1007-16S_Rev_bc1054.fastq.gz	11968
LV09	LV09-16S_For_bc1009-16S_Rev_bc1075.fastq.gz	12031
C7_Lappajarvikk_wood	C7_Lappajarvikk_wood-16S_For_bc1006-16S_Rev_bc1059.fastq.gz	12039
19_4	19_4-16S_For_bc1020-16S_Rev_bc1045.fastq.gz	12059
5574F	5574F-16S_For_bc1008-16S_Rev_bc1056.fastq.gz	12065
5A_Vilppula_wood	5A_Vilppula_wood-16S_For_bc1002-16S_Rev_bc1059.fastq.gz	12126
25_1	25_1-16S_For_bc1022-16S_Rev_bc1054.fastq.gz	12195
Staircase3	Staircase3-16S_For_bc1008-16S_Rev_bc1060.fastq.gz	12203
D6_Chize_wood	D6_Chize_wood-16S_For_bc1010-16S_Rev_bc1056.fastq.gz	12224
5573F	5573F-16S_For_bc1008-16S_Rev_bc1054.fastq.gz	12240
BA05378	BA05378-16S_For_bc1007-16S_Rev_bc1057.fastq.gz	12305
A686080	A686080-16S_For_bc1002-16S_Rev_bc1045.fastq.gz	12312
8A85286	8A85286-16S_For_bc1004-16S_Rev_bc1056.fastq.gz	12336
D28	D28-16S_For_bc1010-16S_Rev_bc1062.fastq.gz	12367
24_5	24_5-16S_For_bc1022-16S_Rev_bc1045.fastq.gz	12373
D36_Chize_wood	D36_Chize_wood-16S_For_bc1011-16S_Rev_bc1033.fastq.gz	12382
26_12	26_12-16S_For_bc1022-16S_Rev_bc1075.fastq.gz	12432
J162F	J162F-16S_For_bc1012-16S_Rev_bc1045.fastq.gz	12445
A810989	A810989-16S_For_bc1003-16S_Rev_bc1059.fastq.gz	12459
4545	4545-16S_For_bc1005-16S_Rev_bc1059.fastq.gz	12560
LV07	LV07-16S_For_bc1009-16S_Rev_bc1065.fastq.gz	12561
5611F	5611F-16S_For_bc1007-16S_Rev_bc1062.fastq.gz	12568
26_13	26_13-16S_For_bc1024-16S_Rev_bc1033.fastq.gz	12591
7_denmark	7_denmark-16S_For_bc1004-16S_Rev_bc1075.fastq.gz	12632
21_19	21_19-16S_For_bc1020-16S_Rev_bc1075.fastq.gz	12696
4A_Twsnievi_wood	4A_Twsnievi_wood-16S_For_bc1003-16S_Rev_bc1059.fastq.gz	12706
18_26	18_26-16S_For_bc1015-16S_Rev_bc1062.fastq.gz	12721
C3_Lappajarvikk_wood	C3_Lappajarvikk_wood-16S_For_bc1006-16S_Rev_bc1056.fastq.gz	12830
A810988	A810988-16S_For_bc1003-16S_Rev_bc1056.fastq.gz	12871
J166F	J166F-16S_For_bc1012-16S_Rev_bc1057.fastq.gz	12885
25_13	25_13-16S_For_bc1022-16S_Rev_bc1062.fastq.gz	12953
16_4	16_4-16S_For_bc1015-16S_Rev_bc1045.fastq.gz	13000
16_denmark	16_denmark-16S_For_bc1009-16S_Rev_bc1059.fastq.gz	13051
21_14	21_14-16S_For_bc1020-16S_Rev_bc1065.fastq.gz	13112
11_5	11_5-16S_For_bc1012-16S_Rev_bc1062.fastq.gz	13137
D22_Chize_wood	D22_Chize_wood-16S_For_bc1010-16S_Rev_bc1062.fastq.gz	13174
LV02	LV02-16S_For_bc1009-16S_Rev_bc1060.fastq.gz	13332
25_9	25_9-16S_For_bc1022-16S_Rev_bc1059.fastq.gz	13376
25_2	25_2-16S_For_bc1022-16S_Rev_bc1056.fastq.gz	13425
6A_Vilppula_wood	6A_Vilppula_wood-16S_For_bc1002-16S_Rev_bc1060.fastq.gz	13440
13_vantaa	13_vantaa-16S_For_bc1081-16S_Rev_bc1062.fastq.gz	13463
18_11	18_11-16S_For_bc1015-16S_Rev_bc1060.fastq.gz	13661
8A85331	8A85331-16S_For_bc1004-16S_Rev_bc1057.fastq.gz	13661
4A_Kuortane_wood	4A_Kuortane_wood-16S_For_bc1006-16S_Rev_bc1075.fastq.gz	13713
52_Saintes_Mallard	52_Saintes_Mallard-16S_For_bc1081-16S_Rev_bc1065.fastq.gz	13716
BA04791	BA04791-16S_For_bc1005-16S_Rev_bc1062.fastq.gz	13752
D35_Chize_wood	D35_Chize_wood-16S_For_bc1010-16S_Rev_bc1075.fastq.gz	13862
BA05380	BA05380-16S_For_bc1007-16S_Rev_bc1059.fastq.gz	13904
Staircase6	Staircase6-16S_For_bc1008-16S_Rev_bc1075.fastq.gz	13928
48_Saintes_Mallard	48_Saintes_Mallard-16S_For_bc1081-16S_Rev_bc1057.fastq.gz	13972
2A_kronoby_wood	2A_kronoby_wood-16S_For_bc1081-16S_Rev_bc1075.fastq.gz	14240
A809582	A809582-16S_For_bc1002-16S_Rev_bc1057.fastq.gz	14366
17_19	17_19-16S_For_bc1015-16S_Rev_bc1056.fastq.gz	14396
21_1	21_1-16S_For_bc1020-16S_Rev_bc1062.fastq.gz	14474
49_Saintes_Mallard	49_Saintes_Mallard-16S_For_bc1081-16S_Rev_bc1059.fastq.gz	14508
B6_Lappajarvikk_wood	B6_Lappajarvikk_wood-16S_For_bc1006-16S_Rev_bc1044.fastq.gz	14595
10A_Vilppula_wood	10A_Vilppula_wood-16S_For_bc1002-16S_Rev_bc1075.fastq.gz	14608
A810912	A810912-16S_For_bc1002-16S_Rev_bc1065.fastq.gz	14650
50_Saintes_Mallard	50_Saintes_Mallard-16S_For_bc1081-16S_Rev_bc1060.fastq.gz	14722
20_16	20_16-16S_For_bc1020-16S_Rev_bc1057.fastq.gz	14819
20_20	20_2o-16S_For_bc1020-16S_Rev_bc1059.fastq.gz	14832
BA05041	BA05041-16S_For_bc1005-16S_Rev_bc1065.fastq.gz	14950
LV45	LV45-16S_For_bc1006-16S_Rev_bc1060.fastq.gz	14954
18_7	18_7-16S_For_bc1015-16S_Rev_bc1059.fastq.gz	14991
Staircase5	Staircase5-16S_For_bc1008-16S_Rev_bc1065.fastq.gz	15134
LV31	LV31-16S_For_bc1006-16S_Rev_bc1056.fastq.gz	15274
18_30	18_3o-16S_For_bc1015-16S_Rev_bc1065.fastq.gz	15298
A809586	A809586-16S_For_bc1002-16S_Rev_bc1062.fastq.gz	15325
12_vantaa	12_vantaa-16S_For_bc1081-16S_Rev_bc1060.fastq.gz	15560
18_3	18_3-16S_For_bc1015-16S_Rev_bc1057.fastq.gz	15574
14_vantaa	14_vantaa-16S_For_bc1081-16S_Rev_bc1065.fastq.gz	15590
A810920	A810920-16S_For_bc1002-16S_Rev_bc1060.fastq.gz	15609
LV29	LV29-16S_For_bc1006-16S_Rev_bc1045.fastq.gz	15615
LV32	LV32-16S_For_bc1006-16S_Rev_bc1057.fastq.gz	15664
00120F	00120F-16S_For_bc1007-16S_Rev_bc1065.fastq.gz	15848
25_5	25_5-16S_For_bc1022-16S_Rev_bc1057.fastq.gz	15857
18_33	18_33-16S_For_bc1015-16S_Rev_bc1075.fastq.gz	15892
2A_Kuortane_wood	2A_Kuortane_wood-16S_For_bc1006-16S_Rev_bc1062.fastq.gz	15945
BA05132	BA05132-16S_For_bc1005-16S_Rev_bc1075.fastq.gz	15949
9_vantaa	9_vantaa-16S_For_bc1081-16S_Rev_bc1057.fastq.gz	16018
6_chize	6_chize-16S_For_bc1006-16S_Rev_bc1065.fastq.gz	16123
5A_Keuruu_wood	5A_Keuruu_wood-16S_For_bc1009-16S_Rev_bc1054.fastq.gz	16546
8_chize	8_chize-16S_For_bc1006-16S_Rev_bc1075.fastq.gz	16606
13_1	13_1-16S_For_bc1012-16S_Rev_bc1075.fastq.gz	16765
A9_Lappajarvikk_wood	A9_Lappajarvikk_wood-16S_For_bc1009-16S_Rev_bc1075.fastq.gz	16784
LV36	LV36-16S_For_bc1006-16S_Rev_bc1059.fastq.gz	17381
LV47	LV47-16S_For_bc1006-16S_Rev_bc1062.fastq.gz	17769
BA05381	BA05381-16S_For_bc1007-16S_Rev_bc1060.fastq.gz	18305
11_6	11_6-16S_For_bc1012-16S_Rev_bc1065.fastq.gz	18464
25_10	25_1o-16S_For_bc1022-16S_Rev_bc1060.fastq.gz	18932
	Total=	3124276
	Average=	8901.07

## Sheet: 3_control_raw_reads
Sample_ID	Fastq filename	Total Reads
Blank1	NA	0
Water4	NA	0
Blank2	Blank2-16S_For_bc1010-16S_Rev_bc1065.fastq.gz	3341
Blank3	Blank3-16S_For_bc1010-16S_Rev_bc1075.fastq.gz	4565
	Total=	7906
	Average=	3953

## Sheet: 4_control_taxa
The taxonomy of amplicon sequence variants (ASVs) present in two DNA extraction controls.
	Kingdom	Phylum	Class	Order	Family	Genus	Species
ASV000032	k__Bacteria	p__Proteobacteria	c__Alphaproteobacteria	o__Sphingomonadales	f__Sphingomonadaceae	g__Sphingopyxis	s__
ASV000040	k__Bacteria	p__Actinobacteriota	c__Actinobacteria	o__Propionibacteriales	f__Propionibacteriaceae	g__Cutibacterium	s__
ASV000041	k__Bacteria	p__Bacteroidota	c__Bacteroidia	o__Flavobacteriales	f__Weeksellaceae	g__Chryseobacterium	s__
ASV000045	k__Bacteria	p__Actinobacteriota	c__Actinobacteria	o__Propionibacteriales	f__Propionibacteriaceae	g__Cutibacterium	s__
ASV000066	k__Bacteria	p__Proteobacteria	c__Gammaproteobacteria	o__Enterobacterales	f__Enterobacteriaceae	g__Escherichia-Shigella	s__Escherichia coli
ASV000077	k__Bacteria	p__Proteobacteria	c__Gammaproteobacteria	o__Pseudomonadales	f__Pseudomonadaceae	g__Pseudomonas	s__Pseudomonas sp. FDAARGOS_380
ASV000115	k__Bacteria	p__Proteobacteria	c__Gammaproteobacteria	o__Enterobacterales	f__Enterobacteriaceae	g__Escherichia-Shigella	s__Escherichia albertii
ASV000126	k__Bacteria	p__Proteobacteria	c__Alphaproteobacteria	o__Rhizobiales	f__Rhizobiaceae	g__Ochrobactrum	s__Ochrobactrum anthropi
ASV000152	k__Bacteria	p__Proteobacteria	c__Alphaproteobacteria	o__Rhizobiales	f__Xanthobacteraceae	g__Afipia	s__Afipia genosp. 1
ASV000164	k__Bacteria	p__Actinobacteriota	c__Actinobacteria	o__Micrococcales	f__Dermacoccaceae	g__Dermacoccus	s__Dermacoccus nishinomiyaensis
ASV000170	k__Bacteria	p__Bacteroidota	c__Bacteroidia	o__Flavobacteriales	f__Weeksellaceae	g__Chryseobacterium	s__
ASV000204	k__Bacteria	p__Proteobacteria	c__Gammaproteobacteria	o__Pseudomonadales	f__Pseudomonadaceae	g__Pseudomonas	s__Pseudomonas versuta
ASV000348	k__Bacteria	p__Firmicutes	c__Bacilli	o__Lactobacillales	f__Carnobacteriaceae	g__Carnobacterium	s__
ASV000457	k__Bacteria	p__Firmicutes	c__Bacilli	o__Lactobacillales	f__Carnobacteriaceae	g__Carnobacterium	s__
ASV000476	k__Bacteria	p__Proteobacteria	c__Gammaproteobacteria	o__Pseudomonadales	f__Pseudomonadaceae	g__Pseudomonas	s__Pseudomonas antarctica
ASV000482	k__Bacteria	p__Proteobacteria	c__Gammaproteobacteria	o__Enterobacterales	f__Enterobacteriaceae	g__Escherichia-Shigella	s__Escherichia coli
ASV000603	k__Bacteria	p__Proteobacteria	c__Gammaproteobacteria	o__Pseudomonadales	f__Pseudomonadaceae	g__Pseudomonas	s__Pseudomonas lurida
ASV000616	k__Bacteria	p__Actinobacteriota	c__Actinobacteria	o__Propionibacteriales	f__Propionibacteriaceae	g__Cutibacterium	s__
ASV000771	k__Bacteria	p__Bacteroidota	c__Bacteroidia	o__Flavobacteriales	f__Weeksellaceae	g__Chryseobacterium	s__
ASV000882	k__Bacteria	p__Actinobacteriota	c__Actinobacteria	o__Corynebacteriales	f__Corynebacteriaceae	g__Lawsonella	s__
ASV000885	k__Bacteria	p__Actinobacteriota	c__Actinobacteria	o__Micrococcales	f__Micrococcaceae	g__Kocuria	s__Kocuria rhizophila
ASV001081	k__Bacteria	p__Proteobacteria	c__Alphaproteobacteria	o__Rhodobacterales	f__Rhodobacteraceae	g__Paracoccus	s__
ASV001106	k__Bacteria	p__Proteobacteria	c__Alphaproteobacteria	o__Rhizobiales	f__Xanthobacteraceae	g__Bradyrhizobium	s__Bradyrhizobium sp. SEMIA 6399
ASV001124	k__Bacteria	p__Proteobacteria	c__Gammaproteobacteria	o__Burkholderiales	f__Burkholderiaceae	g__Ralstonia	s__Ralstonia insidiosa
ASV001229	k__Bacteria	p__Proteobacteria	c__Gammaproteobacteria	o__Pseudomonadales	f__Moraxellaceae	g__Psychrobacter	s__Psychrobacter fozii
ASV001260	k__Bacteria	p__Firmicutes	c__Bacilli	o__Staphylococcales	f__Staphylococcaceae	g__Staphylococcus	s__Staphylococcus capitis
ASV001436	k__Bacteria	p__Proteobacteria	c__Gammaproteobacteria	o__Pseudomonadales	f__Pseudomonadaceae	g__Pseudomonas	s__Pseudomonas sp. LG1E9
ASV001580	k__Bacteria	p__Proteobacteria	c__Gammaproteobacteria	o__Pseudomonadales	f__Moraxellaceae	g__Psychrobacter	s__Psychrobacter alimentarius
ASV001763	k__Bacteria	p__Firmicutes	c__Bacilli	o__Lactobacillales	f__Catellicoccaceae	g__Catellicoccus	s__
ASV001821	k__Bacteria	p__Firmicutes	c__Bacilli	o__Staphylococcales	f__Staphylococcaceae	g__Staphylococcus	s__Staphylococcus capitis
ASV001887	k__Bacteria	p__Bacteroidota	c__Bacteroidia	o__Flavobacteriales	f__Weeksellaceae	g__Chryseobacterium	s__
ASV001939	k__Bacteria	p__Firmicutes	c__Clostridia	o__Clostridiales	f__Clostridiaceae	g__Clostridium sensu stricto 10	s__
ASV001945	k__Bacteria	p__Bacteroidota	c__Bacteroidia	o__Flavobacteriales	f__Weeksellaceae	g__Chryseobacterium	s__
ASV002075	k__Bacteria	p__Proteobacteria	c__Gammaproteobacteria	o__Pseudomonadales	f__Moraxellaceae	g__Acinetobacter	s__
ASV002212	k__Bacteria	p__Actinobacteriota	c__Actinobacteria	o__Corynebacteriales	f__Mycobacteriaceae	g__Mycobacterium	s__
ASV002473	k__Bacteria	p__Proteobacteria	c__Gammaproteobacteria	o__Pseudomonadales	f__Pseudomonadaceae	g__Pseudomonas	s__
ASV002551	k__Bacteria	p__Proteobacteria	c__Alphaproteobacteria	o__Rhizobiales	f__Rhizobiaceae	g__Mesorhizobium	s__Mesorhizobium sp. NBIMC_P2-C1
ASV003229	k__Bacteria	p__Proteobacteria	c__Gammaproteobacteria	o__Enterobacterales	f__Erwiniaceae	g__Pantoea	s__Pantoea agglomerans
ASV003278	k__Bacteria	p__Proteobacteria	c__Alphaproteobacteria	o__Rhizobiales	f__Beijerinckiaceae	g__Bosea	s__Bosea sp. CRIB-12
ASV003377	k__Bacteria	p__Firmicutes	c__Bacilli	o__Lactobacillales	f__Carnobacteriaceae	g__Carnobacterium	s__
ASV003602	k__Bacteria	p__Proteobacteria	c__Gammaproteobacteria	o__Pseudomonadales	f__Pseudomonadaceae	g__Pseudomonas	s__
ASV003666	k__Bacteria	p__Proteobacteria	c__Gammaproteobacteria	o__Pseudomonadales	f__Pseudomonadaceae	g__Pseudomonas	s__Pseudomonas sp. S09G 359
ASV004032	k__Bacteria	p__Firmicutes	c__Bacilli	o__Lactobacillales	f__Carnobacteriaceae	g__Carnobacterium	s__
ASV004248	k__Bacteria	p__Proteobacteria	c__Gammaproteobacteria	o__Enterobacterales	f__Erwiniaceae	g__Pantoea	s__Pantoea agglomerans
ASV004482	k__Bacteria	p__Proteobacteria	c__Gammaproteobacteria	o__Pseudomonadales	f__Moraxellaceae	g__Acinetobacter	s__Acinetobacter johnsonii XBB1
ASV004884	k__Bacteria	p__Bacteroidota	c__Bacteroidia	o__Flavobacteriales	f__Weeksellaceae	g__Chryseobacterium	s__
ASV005122	k__Bacteria	p__Actinobacteriota	c__Acidimicrobiia	o__Microtrichales	f__Ilumatobacteraceae	g__Ilumatobacter	s__
ASV005137	k__Bacteria	p__Bacteroidota	c__Bacteroidia	o__Flavobacteriales	f__Weeksellaceae	g__Chryseobacterium	s__
ASV005150	k__Bacteria	p__Proteobacteria	c__Gammaproteobacteria	o__Pseudomonadales	f__Pseudomonadaceae	g__Pseudomonas	s__Pseudomonas antarctica
ASV005498	k__Bacteria	p__Actinobacteriota	c__Actinobacteria	o__Corynebacteriales	f__Corynebacteriaceae	g__Corynebacterium	s__
ASV005536	k__Bacteria	p__Bacteroidota	c__Bacteroidia	o__Flavobacteriales	f__Weeksellaceae	g__Chryseobacterium	s__
ASV006463	k__Bacteria	p__Firmicutes	c__Bacilli	o__Lactobacillales	f__Carnobacteriaceae	g__Carnobacterium	s__
ASV006934	k__Bacteria	p__Proteobacteria	c__Gammaproteobacteria	o__Pseudomonadales	f__Pseudomonadaceae	g__Pseudomonas	s__Pseudomonas versuta
ASV007137	k__Bacteria	p__Proteobacteria	c__Gammaproteobacteria	o__Enterobacterales	f__Enterobacteriaceae	g__Escherichia-Shigella	s__Escherichia albertii
ASV007958	k__Bacteria	p__Proteobacteria	c__Gammaproteobacteria	o__Pseudomonadales	f__Moraxellaceae	g__Acinetobacter	s__Acinetobacter lwoffii ATCC 9957 = CIP 70.31
ASV008323	k__Bacteria	p__Bacteroidota	c__Bacteroidia	o__Flavobacteriales	f__Weeksellaceae	g__Chryseobacterium	s__
ASV010252	k__Bacteria	p__Actinobacteriota	c__Actinobacteria	o__Propionibacteriales	f__Propionibacteriaceae	g__Cutibacterium	s__
ASV010804	k__Bacteria	p__Proteobacteria	c__Gammaproteobacteria	o__Pseudomonadales	f__Pseudomonadaceae	g__Pseudomonas	s__Pseudomonas versuta
ASV011025	k__Bacteria	p__Proteobacteria	c__Gammaproteobacteria	o__Pseudomonadales	f__Pseudomonadaceae	g__Pseudomonas	s__Pseudomonas versuta
ASV011681	k__Bacteria	p__Proteobacteria	c__Gammaproteobacteria	o__Enterobacterales	f__Enterobacteriaceae	g__Raoultella	s__Raoultella ornithinolytica
ASV012070	k__Bacteria	p__Proteobacteria	c__Gammaproteobacteria	o__Enterobacterales	f__Enterobacteriaceae	g__Klebsiella	s__Klebsiella michiganensis
ASV012975	k__Bacteria	p__Proteobacteria	c__Gammaproteobacteria	o__Pseudomonadales	f__Pseudomonadaceae	g__Pseudomonas	s__Pseudomonas sp. FDAARGOS_380
ASV015384	k__Bacteria	p__Proteobacteria	c__Gammaproteobacteria	o__Burkholderiales	f__Oxalobacteraceae	g__Massilia	s__
ASV019949	k__Bacteria	p__Actinobacteriota	c__Actinobacteria	o__Propionibacteriales	f__Propionibacteriaceae	g__Cutibacterium	s__
ASV021125	k__Bacteria	p__Bacteroidota	c__Bacteroidia	o__Flavobacteriales	f__Weeksellaceae	g__Chryseobacterium	s__
ASV021625	k__Bacteria	p__Proteobacteria	c__Gammaproteobacteria	o__Pseudomonadales	f__Pseudomonadaceae	g__Pseudomonas	s__Pseudomonas antarctica
ASV021807	k__Bacteria	p__Proteobacteria	c__Alphaproteobacteria	o__Rhizobiales	f__Pleomorphomonadaceae	g__Pleomorphomonas	s__Pleomorphomonas oryzae DSM 16300
ASV022129	k__Bacteria	p__Firmicutes	c__Bacilli	o__Lactobacillales	f__Carnobacteriaceae	g__Carnobacterium	s__
ASV022784	k__Bacteria	p__Proteobacteria	c__Gammaproteobacteria	o__Pseudomonadales	f__Pseudomonadaceae	g__Pseudomonas	s__Pseudomonas auricularis
ASV022870	k__Bacteria	p__Proteobacteria	c__Gammaproteobacteria	o__Enterobacterales	f__Enterobacteriaceae	g__Escherichia-Shigella	s__Escherichia coli
ASV022922	k__Bacteria	p__Proteobacteria	c__Gammaproteobacteria	o__Pseudomonadales	f__Moraxellaceae	g__Psychrobacter	s__Psychrobacter alimentarius
ASV023133	k__Bacteria	p__Actinobacteriota	c__Actinobacteria	o__Propionibacteriales	f__Propionibacteriaceae	g__Cutibacterium	s__
ASV023688	k__Bacteria	p__Bacteroidota	c__Bacteroidia	o__Flavobacteriales	f__Weeksellaceae	g__Chryseobacterium	s__
ASV023738	k__Bacteria	p__Proteobacteria	c__Gammaproteobacteria	o__Enterobacterales	f__Enterobacteriaceae	g__Escherichia-Shigella	s__Escherichia coli
ASV024365	k__Bacteria	p__Bacteroidota	c__Bacteroidia	o__Flavobacteriales	f__Weeksellaceae	g__Chryseobacterium	s__
ASV024522	k__Bacteria	p__Actinobacteriota	c__Actinobacteria	o__Micrococcales	f__Dermacoccaceae	g__Dermacoccus	s__Dermacoccus nishinomiyaensis
ASV024673	k__Bacteria	p__Firmicutes	c__Bacilli	o__Lactobacillales	f__Carnobacteriaceae	g__Carnobacterium	s__
ASV025016	k__Bacteria	p__Bacteroidota	c__Bacteroidia	o__Flavobacteriales	f__Weeksellaceae	g__Chryseobacterium	s__
ASV025081	k__Bacteria	p__Proteobacteria	c__Gammaproteobacteria	o__Pseudomonadales	f__Pseudomonadaceae	g__Pseudomonas	s__Pseudomonas fluorescens A506
ASV025758	k__Bacteria	p__Proteobacteria	c__Alphaproteobacteria	o__Rhizobiales	f__Xanthobacteraceae	g__Afipia	s__Afipia genosp. 1
ASV025840	k__Bacteria	p__Proteobacteria	c__Gammaproteobacteria	o__Pseudomonadales	f__Pseudomonadaceae	g__Pseudomonas	s__Pseudomonas versuta
ASV026047	k__Bacteria	p__Proteobacteria	c__Alphaproteobacteria	o__Sphingomonadales	f__Sphingomonadaceae	g__Sphingopyxis	s__
ASV026543	k__Bacteria	p__Actinobacteriota	c__Actinobacteria	o__Propionibacteriales	f__Propionibacteriaceae	g__Cutibacterium	s__
ASV026755	k__Bacteria	p__Bacteroidota	c__Bacteroidia	o__Flavobacteriales	f__Weeksellaceae	g__Chryseobacterium	s__
ASV026933	k__Bacteria	p__Proteobacteria	c__Gammaproteobacteria	o__Pseudomonadales	f__Pseudomonadaceae	g__Pseudomonas	s__Pseudomonas lurida
ASV027208	k__Bacteria	p__Proteobacteria	c__Gammaproteobacteria	o__Pseudomonadales	f__Pseudomonadaceae	g__Pseudomonas	s__Pseudomonas versuta
ASV029179	k__Bacteria	p__Proteobacteria	c__Gammaproteobacteria	o__Pseudomonadales	f__Pseudomonadaceae	g__Pseudomonas	s__Pseudomonas sp. S09G 359
ASV029850	k__Bacteria	p__Proteobacteria	c__Gammaproteobacteria	o__Enterobacterales	f__Enterobacteriaceae	g__Escherichia-Shigella	s__Escherichia coli S88
ASV030140	k__Bacteria	p__Proteobacteria	c__Gammaproteobacteria	o__Burkholderiales	f__Burkholderiaceae	g__Ralstonia	s__Ralstonia insidiosa
ASV030163	k__Bacteria	p__Actinobacteriota	c__Actinobacteria	o__Propionibacteriales	f__Propionibacteriaceae	g__Cutibacterium	s__
ASV030436	k__Bacteria	p__Actinobacteriota	c__Actinobacteria	o__Propionibacteriales	f__Propionibacteriaceae	g__Cutibacterium	s__
ASV030701	k__Bacteria	p__Proteobacteria	c__Gammaproteobacteria	o__Pseudomonadales	f__Pseudomonadaceae	g__Pseudomonas	s__Pseudomonas sp. LG1D9
ASV031105	k__Bacteria	p__Actinobacteriota	c__Actinobacteria	o__Propionibacteriales	f__Propionibacteriaceae	g__Cutibacterium	s__
ASV031761	k__Bacteria	p__Bacteroidota	c__Bacteroidia	o__Flavobacteriales	f__Weeksellaceae	g__Chryseobacterium	s__
ASV032884	k__Bacteria	p__Bacteroidota	c__Bacteroidia	o__Flavobacteriales	f__Weeksellaceae	g__Chryseobacterium	s__
ASV033433	k__Bacteria	p__Actinobacteriota	c__Actinobacteria	o__Propionibacteriales	f__Propionibacteriaceae	g__Cutibacterium	s__
ASV033744	k__Bacteria	p__Firmicutes	c__Bacilli	o__Mycoplasmatales	f__Mycoplasmataceae	g__Mycoplasma	s__Mycoplasma penetrans HF-2
ASV034184	k__Bacteria	p__Actinobacteriota	c__Actinobacteria	o__Propionibacteriales	f__Propionibacteriaceae	g__Cutibacterium	s__
ASV034190	k__Bacteria	p__Bacteroidota	c__Bacteroidia	o__Flavobacteriales	f__Weeksellaceae	g__Chryseobacterium	s__
ASV034336	k__Bacteria	p__Firmicutes	c__Bacilli	o__Lactobacillales	f__Carnobacteriaceae	g__Carnobacterium	s__
ASV034626	k__Bacteria	p__Proteobacteria	c__Gammaproteobacteria	o__Pseudomonadales	f__Pseudomonadaceae	g__Pseudomonas	s__Pseudomonas sp. FDAARGOS_380
ASV035539	k__Bacteria	p__Proteobacteria	c__Gammaproteobacteria	o__Enterobacterales	f__Erwiniaceae	g__Pantoea	s__Pantoea agglomerans
ASV035606	k__Bacteria	p__Actinobacteriota	c__Actinobacteria	o__Propionibacteriales	f__Propionibacteriaceae	g__Cutibacterium	s__
ASV035623	k__Bacteria	p__Proteobacteria	c__Gammaproteobacteria	o__Pseudomonadales	f__Pseudomonadaceae	g__Pseudomonas	s__
ASV035848	k__Bacteria	p__Bacteroidota	c__Bacteroidia	o__Flavobacteriales	f__Weeksellaceae	g__Chryseobacterium	s__
ASV035940	k__Bacteria	p__Proteobacteria	c__Gammaproteobacteria	o__Pseudomonadales	f__Moraxellaceae	g__Psychrobacter	s__Psychrobacter alimentarius
ASV036187	k__Bacteria	p__Proteobacteria	c__Gammaproteobacteria	o__Pseudomonadales	f__Pseudomonadaceae	g__Pseudomonas	s__Pseudomonas sp. FDAARGOS_380
ASV037308	k__Bacteria	p__Proteobacteria	c__Gammaproteobacteria	o__Enterobacterales	f__Enterobacteriaceae	g__Escherichia-Shigella	s__Escherichia coli
ASV038925	k__Bacteria	p__Proteobacteria	c__Gammaproteobacteria	o__Enterobacterales	f__Enterobacteriaceae	g__Escherichia-Shigella	s__Escherichia coli
ASV039130	k__Bacteria	p__Proteobacteria	c__Alphaproteobacteria	o__Rhizobiales	f__Xanthobacteraceae	g__Afipia	s__Afipia genosp. 1
ASV039457	k__Bacteria	p__Actinobacteriota	c__Actinobacteria	o__Corynebacteriales	f__Mycobacteriaceae	g__Mycobacterium	s__
ASV039596	k__Bacteria	p__Proteobacteria	c__Alphaproteobacteria	o__Rhizobiales	f__Xanthobacteraceae	g__Afipia	s__Afipia genosp. 1
ASV039786	k__Bacteria	p__Actinobacteriota	c__Actinobacteria	o__Propionibacteriales	f__Propionibacteriaceae	g__Cutibacterium	s__
ASV039878	k__Bacteria	p__Proteobacteria	c__Gammaproteobacteria	o__Enterobacterales	f__Erwiniaceae	g__Pantoea	s__Pantoea agglomerans
ASV039943	k__Bacteria	p__Firmicutes	c__Bacilli	o__Lactobacillales	f__Carnobacteriaceae	g__Carnobacterium	s__
ASV040174	k__Bacteria	p__Proteobacteria	c__Gammaproteobacteria	o__Pseudomonadales	f__Pseudomonadaceae	g__Pseudomonas	s__Pseudomonas antarctica
ASV044124	k__Bacteria	p__Proteobacteria	c__Gammaproteobacteria	o__Pseudomonadales	f__Moraxellaceae	g__Psychrobacter	s__Psychrobacter alimentarius
ASV044144	k__Bacteria	p__Proteobacteria	c__Gammaproteobacteria	o__Pseudomonadales	f__Pseudomonadaceae	g__Pseudomonas	s__Pseudomonas antarctica
ASV044673	k__Bacteria	p__Proteobacteria	c__Gammaproteobacteria	o__Pseudomonadales	f__Pseudomonadaceae	g__Pseudomonas	s__Pseudomonas sp. LG1E9
ASV044841	k__Bacteria	p__Proteobacteria	c__Alphaproteobacteria	o__Rhizobiales	f__Xanthobacteraceae	g__Afipia	s__Afipia genosp. 1
ASV045025	k__Bacteria	p__Proteobacteria	c__Alphaproteobacteria	o__Sphingomonadales	f__Sphingomonadaceae	g__Sphingopyxis	s__
ASV045655	k__Bacteria	p__Proteobacteria	c__Gammaproteobacteria	o__Pseudomonadales	f__Pseudomonadaceae	g__Pseudomonas	s__Pseudomonas psychrophila
ASV045701	k__Bacteria	p__Proteobacteria	c__Gammaproteobacteria	o__Pseudomonadales	f__Pseudomonadaceae	g__Pseudomonas	s__Pseudomonas antarctica
ASV045756	k__Bacteria	p__Bacteroidota	c__Bacteroidia	o__Flavobacteriales	f__Weeksellaceae	g__Chryseobacterium	s__
ASV046496	k__Bacteria	p__Bacteroidota	c__Bacteroidia	o__Flavobacteriales	f__Weeksellaceae	g__Chryseobacterium	s__
ASV046524	k__Bacteria	p__Proteobacteria	c__Gammaproteobacteria	o__Pseudomonadales	f__Pseudomonadaceae	g__Pseudomonas	s__Pseudomonas fluorescens A506
ASV046638	k__Bacteria	p__Bacteroidota	c__Bacteroidia	o__Flavobacteriales	f__Weeksellaceae	g__Chryseobacterium	s__
ASV046925	k__Bacteria	p__Actinobacteriota	c__Actinobacteria	o__Propionibacteriales	f__Propionibacteriaceae	g__Cutibacterium	s__
ASV047135	k__Bacteria	p__Bacteroidota	c__Bacteroidia	o__Flavobacteriales	f__Weeksellaceae	g__Chryseobacterium	s__
ASV047286	k__Bacteria	p__Bacteroidota	c__Bacteroidia	o__Flavobacteriales	f__Weeksellaceae	g__Chryseobacterium	s__
ASV048451	k__Bacteria	p__Proteobacteria	c__Gammaproteobacteria	o__Enterobacterales	f__Enterobacteriaceae	g__Raoultella	s__Raoultella ornithinolytica
ASV048484	k__Bacteria	p__Actinobacteriota	c__Actinobacteria	o__Propionibacteriales	f__Propionibacteriaceae	g__Cutibacterium	s__
ASV048648	k__Bacteria	p__Proteobacteria	c__Gammaproteobacteria	o__Pseudomonadales	f__Pseudomonadaceae	g__Pseudomonas	s__Pseudomonas versuta
ASV049028	k__Bacteria	p__Bacteroidota	c__Bacteroidia	o__Flavobacteriales	f__Weeksellaceae	g__Chryseobacterium	s__
ASV049272	k__Bacteria	p__Firmicutes	c__Bacilli	o__Lactobacillales	f__Carnobacteriaceae	g__Carnobacterium	s__
ASV049367	k__Bacteria	p__Bacteroidota	c__Bacteroidia	o__Flavobacteriales	f__Weeksellaceae	g__Chryseobacterium	s__
ASV049831	k__Bacteria	p__Bacteroidota	c__Bacteroidia	o__Flavobacteriales	f__Weeksellaceae	g__Chryseobacterium	s__
ASV049993	k__Bacteria	p__Proteobacteria	c__Gammaproteobacteria	o__Pseudomonadales	f__Pseudomonadaceae	g__Pseudomonas	s__Pseudomonas fluorescens
ASV050525	k__Bacteria	p__Firmicutes	c__Bacilli	o__Lactobacillales	f__Carnobacteriaceae	g__Carnobacterium	s__
ASV050634	k__Bacteria	p__Actinobacteriota	c__Actinobacteria	o__Corynebacteriales	f__Mycobacteriaceae	g__Mycobacterium	s__
ASV051202	k__Bacteria	p__Proteobacteria	c__Gammaproteobacteria	o__Pseudomonadales	f__Pseudomonadaceae	g__Pseudomonas	s__Pseudomonas versuta
ASV051396	k__Bacteria	p__Actinobacteriota	c__Actinobacteria	o__Propionibacteriales	f__Propionibacteriaceae	g__Cutibacterium	s__
ASV052188	k__Bacteria	p__Actinobacteriota	c__Actinobacteria	o__Propionibacteriales	f__Propionibacteriaceae	g__Cutibacterium	s__
ASV053481	k__Bacteria	p__Actinobacteriota	c__Actinobacteria	o__Propionibacteriales	f__Propionibacteriaceae	g__Cutibacterium	s__
ASV053526	k__Bacteria	p__Proteobacteria	c__Alphaproteobacteria	o__Rhizobiales	f__Xanthobacteraceae	g__Afipia	s__Afipia genosp. 1
ASV055412	k__Bacteria	p__Actinobacteriota	c__Actinobacteria	o__Propionibacteriales	f__Propionibacteriaceae	g__Cutibacterium	s__
ASV056624	k__Bacteria	p__Actinobacteriota	c__Actinobacteria	o__Propionibacteriales	f__Propionibacteriaceae	g__Cutibacterium	s__
ASV057144	k__Bacteria	p__Bacteroidota	c__Bacteroidia	o__Flavobacteriales	f__Weeksellaceae	g__Chryseobacterium	s__
ASV057673	k__Bacteria	p__Actinobacteriota	c__Actinobacteria	o__Propionibacteriales	f__Propionibacteriaceae	g__Cutibacterium	s__
ASV057778	k__Bacteria	p__Actinobacteriota	c__Actinobacteria	o__Propionibacteriales	f__Propionibacteriaceae	g__Cutibacterium	s__
ASV057959	k__Bacteria	p__Proteobacteria	c__Gammaproteobacteria	o__Pseudomonadales	f__Pseudomonadaceae	g__Pseudomonas	s__Pseudomonas fluorescens
ASV057979	k__Bacteria	p__Proteobacteria	c__Gammaproteobacteria	o__Pseudomonadales	f__Pseudomonadaceae	g__Pseudomonas	s__Pseudomonas sp. FDAARGOS_380
ASV059194	k__Bacteria	p__Bacteroidota	c__Bacteroidia	o__Flavobacteriales	f__Weeksellaceae	g__Chryseobacterium	s__
ASV059526	k__Bacteria	p__Proteobacteria	c__Alphaproteobacteria	o__Sphingomonadales	f__Sphingomonadaceae	g__Sphingopyxis	s__
ASV059828	k__Bacteria	p__Proteobacteria	c__Gammaproteobacteria	o__Pseudomonadales	f__Pseudomonadaceae	g__Pseudomonas	s__Pseudomonas versuta
ASV060058	k__Bacteria	p__Firmicutes	c__Clostridia	o__Clostridiales	f__Clostridiaceae	g__Clostridium sensu stricto 10	s__
ASV061722	k__Bacteria	p__Actinobacteriota	c__Actinobacteria	o__Propionibacteriales	f__Propionibacteriaceae	g__Cutibacterium	s__
ASV062318	k__Bacteria	p__Proteobacteria	c__Gammaproteobacteria	o__Enterobacterales	f__Erwiniaceae	g__Pantoea	s__Pantoea agglomerans
ASV063213	k__Bacteria	p__Proteobacteria	c__Gammaproteobacteria	o__Pseudomonadales	f__Pseudomonadaceae	g__Pseudomonas	s__Pseudomonas sp. FDAARGOS_380
ASV063969	k__Bacteria	p__Proteobacteria	c__Alphaproteobacteria	o__Rhizobiales	f__Xanthobacteraceae	g__Afipia	s__Afipia genosp. 1
ASV063985	k__Bacteria	p__Proteobacteria	c__Alphaproteobacteria	o__Rhizobiales	f__Xanthobacteraceae	g__Afipia	s__Afipia genosp. 1
ASV064041	k__Bacteria	p__Firmicutes	c__Bacilli	o__Lactobacillales	f__Carnobacteriaceae	g__Carnobacterium	s__
ASV064441	k__Bacteria	p__Proteobacteria	c__Alphaproteobacteria	o__Rhizobiales	f__Xanthobacteraceae	g__Afipia	s__Afipia genosp. 1
ASV065594	k__Bacteria	p__Actinobacteriota	c__Actinobacteria	o__Propionibacteriales	f__Propionibacteriaceae	g__Cutibacterium	s__
ASV066574	k__Bacteria	p__Actinobacteriota	c__Actinobacteria	o__Propionibacteriales	f__Propionibacteriaceae	g__Cutibacterium	s__
ASV066866	k__Bacteria	p__Bacteroidota	c__Bacteroidia	o__Flavobacteriales	f__Weeksellaceae	g__Chryseobacterium	s__
ASV067018	k__Bacteria	p__Actinobacteriota	c__Actinobacteria	o__Propionibacteriales	f__Propionibacteriaceae	g__Cutibacterium	s__
ASV067732	k__Bacteria	p__Bacteroidota	c__Bacteroidia	o__Flavobacteriales	f__Weeksellaceae	g__Chryseobacterium	s__
ASV068108	k__Bacteria	p__Proteobacteria	c__Alphaproteobacteria	o__Rhizobiales	f__Xanthobacteraceae	g__Afipia	s__Afipia genosp. 1
ASV068199	k__Bacteria	p__Proteobacteria	c__Alphaproteobacteria	o__Rhizobiales	f__Xanthobacteraceae	g__Afipia	s__Afipia genosp. 1
ASV068428	k__Bacteria	p__Proteobacteria	c__Gammaproteobacteria	o__Pseudomonadales	f__Pseudomonadaceae	g__Pseudomonas	s__Pseudomonas fluorescens A506
ASV069056	k__Bacteria	p__Proteobacteria	c__Gammaproteobacteria	o__Pseudomonadales	f__Pseudomonadaceae	g__Pseudomonas	s__Pseudomonas sp. FDAARGOS_380
ASV069694	k__Bacteria	p__Proteobacteria	c__Gammaproteobacteria	o__Pseudomonadales	f__Pseudomonadaceae	g__Pseudomonas	s__Pseudomonas sp. LG1E9
ASV069914	k__Bacteria	p__Actinobacteriota	c__Actinobacteria	o__Micrococcales	f__Dermacoccaceae	g__Dermacoccus	s__Dermacoccus nishinomiyaensis
ASV070425	k__Bacteria	p__Proteobacteria	c__Gammaproteobacteria	o__Pseudomonadales	f__Pseudomonadaceae	g__Pseudomonas	s__Pseudomonas sp. FDAARGOS_380
ASV070461	k__Bacteria	p__Bacteroidota	c__Bacteroidia	o__Flavobacteriales	f__Weeksellaceae	g__Chryseobacterium	s__
ASV070903	k__Bacteria	p__Actinobacteriota	c__Actinobacteria	o__Propionibacteriales	f__Propionibacteriaceae	g__Cutibacterium	s__
ASV071071	k__Bacteria	p__Bacteroidota	c__Bacteroidia	o__Flavobacteriales	f__Weeksellaceae	g__Chryseobacterium	s__
ASV071149	k__Bacteria	p__Proteobacteria	c__Gammaproteobacteria	o__Pseudomonadales	f__Pseudomonadaceae	g__Pseudomonas	s__Pseudomonas lurida
ASV071717	k__Bacteria	p__Bacteroidota	c__Bacteroidia	o__Flavobacteriales	f__Weeksellaceae	g__Chryseobacterium	s__
ASV072412	k__Bacteria	p__Actinobacteriota	c__Actinobacteria	o__Micrococcales	f__Micrococcaceae	g__Kocuria	s__Kocuria rhizophila
ASV073775	k__Bacteria	p__Bacteroidota	c__Bacteroidia	o__Flavobacteriales	f__Weeksellaceae	g__Chryseobacterium	s__
ASV073955	k__Bacteria	p__Proteobacteria	c__Gammaproteobacteria	o__Pseudomonadales	f__Pseudomonadaceae	g__Pseudomonas	s__Pseudomonas sp. LG1E9
ASV074063	k__Bacteria	p__Proteobacteria	c__Gammaproteobacteria	o__Pseudomonadales	f__Pseudomonadaceae	g__Pseudomonas	s__Pseudomonas versuta
ASV074830	k__Bacteria	p__Actinobacteriota	c__Actinobacteria	o__Micrococcales	f__Micrococcaceae	g__Kocuria	s__Kocuria rhizophila
ASV074888	k__Bacteria	p__Actinobacteriota	c__Actinobacteria	o__Propionibacteriales	f__Propionibacteriaceae	g__Cutibacterium	s__
ASV077084	k__Bacteria	p__Bacteroidota	c__Bacteroidia	o__Flavobacteriales	f__Weeksellaceae	g__Chryseobacterium	s__
ASV077671	k__Bacteria	p__Bacteroidota	c__Bacteroidia	o__Flavobacteriales	f__Weeksellaceae	g__Chryseobacterium	s__
ASV077681	k__Bacteria	p__Bacteroidota	c__Bacteroidia	o__Flavobacteriales	f__Weeksellaceae	g__Chryseobacterium	s__
ASV077943	k__Bacteria	p__Proteobacteria	c__Gammaproteobacteria	o__Pseudomonadales	f__Moraxellaceae	g__Psychrobacter	s__Psychrobacter alimentarius
ASV078073	k__Bacteria	p__Actinobacteriota	c__Actinobacteria	o__Corynebacteriales	f__Corynebacteriaceae	g__Lawsonella	s__
ASV078181	k__Bacteria	p__Proteobacteria	c__Gammaproteobacteria	o__Pseudomonadales	f__Pseudomonadaceae	g__Pseudomonas	s__Pseudomonas versuta
ASV078491	k__Bacteria	p__Bacteroidota	c__Bacteroidia	o__Flavobacteriales	f__Weeksellaceae	g__Chryseobacterium	s__
ASV078546	k__Bacteria	p__Proteobacteria	c__Gammaproteobacteria	o__Enterobacterales	f__Enterobacteriaceae	g__Escherichia-Shigella	s__Escherichia coli
ASV078753	k__Bacteria	p__Proteobacteria	c__Gammaproteobacteria	o__Pseudomonadales	f__Moraxellaceae	g__Psychrobacter	s__Psychrobacter alimentarius
ASV079513	k__Bacteria	p__Bacteroidota	c__Bacteroidia	o__Flavobacteriales	f__Weeksellaceae	g__Chryseobacterium	s__
ASV080249	k__Bacteria	p__Proteobacteria	c__Alphaproteobacteria	o__Rhizobiales	f__Xanthobacteraceae	g__Bradyrhizobium	s__Bradyrhizobium sp. SEMIA 6399
ASV080358	k__Bacteria	p__Actinobacteriota	c__Actinobacteria	o__Propionibacteriales	f__Propionibacteriaceae	g__Cutibacterium	s__
ASV081329	k__Bacteria	p__Bacteroidota	c__Bacteroidia	o__Flavobacteriales	f__Weeksellaceae	g__Chryseobacterium	s__
ASV081541	k__Bacteria	p__Proteobacteria	c__Gammaproteobacteria	o__Pseudomonadales	f__Moraxellaceae	g__Psychrobacter	s__Psychrobacter alimentarius
ASV081626	k__Bacteria	p__Proteobacteria	c__Gammaproteobacteria	o__Pseudomonadales	f__Moraxellaceae	g__Acinetobacter	s__
ASV081784	k__Bacteria	p__Proteobacteria	c__Gammaproteobacteria	o__Pseudomonadales	f__Moraxellaceae	g__Psychrobacter	s__Psychrobacter alimentarius
ASV081828	k__Bacteria	p__Actinobacteriota	c__Actinobacteria	o__Propionibacteriales	f__Propionibacteriaceae	g__Cutibacterium	s__
ASV082021	k__Bacteria	p__Actinobacteriota	c__Actinobacteria	o__Propionibacteriales	f__Propionibacteriaceae	g__Cutibacterium	s__
ASV082738	k__Bacteria	p__Proteobacteria	c__Gammaproteobacteria	o__Pseudomonadales	f__Pseudomonadaceae	g__Pseudomonas	s__Pseudomonas versuta
ASV082907	k__Bacteria	p__Bacteroidota	c__Bacteroidia	o__Flavobacteriales	f__Weeksellaceae	g__Chryseobacterium	s__
ASV083427	k__Bacteria	p__Proteobacteria	c__Gammaproteobacteria	o__Pseudomonadales	f__Pseudomonadaceae	g__Pseudomonas	s__Pseudomonas antarctica
ASV083431	k__Bacteria	p__Proteobacteria	c__Alphaproteobacteria	o__Rhizobiales	f__Xanthobacteraceae	g__Afipia	s__Afipia genosp. 1
ASV083576	k__Bacteria	p__Bacteroidota	c__Bacteroidia	o__Flavobacteriales	f__Weeksellaceae	g__Chryseobacterium	s__
ASV083641	k__Bacteria	p__Proteobacteria	c__Gammaproteobacteria	o__Pseudomonadales	f__Pseudomonadaceae	g__Pseudomonas	s__Pseudomonas versuta
ASV084106	k__Bacteria	p__Proteobacteria	c__Alphaproteobacteria	o__Rhizobiales	f__Xanthobacteraceae	g__Afipia	s__Afipia genosp. 1
ASV084874	k__Bacteria	p__Proteobacteria	c__Gammaproteobacteria	o__Pseudomonadales	f__Pseudomonadaceae	g__Pseudomonas	s__Pseudomonas sp. LG1E9
ASV085418	k__Bacteria	p__Proteobacteria	c__Gammaproteobacteria	o__Pseudomonadales	f__Pseudomonadaceae	g__Pseudomonas	s__Pseudomonas versuta
ASV086031	k__Bacteria	p__Firmicutes	c__Bacilli	o__Staphylococcales	f__Staphylococcaceae	g__Staphylococcus	s__Staphylococcus capitis
ASV086412	k__Bacteria	p__Proteobacteria	c__Alphaproteobacteria	o__Rhizobiales	f__Xanthobacteraceae	g__Afipia	s__Afipia genosp. 1
ASV086428	k__Bacteria	p__Proteobacteria	c__Gammaproteobacteria	o__Pseudomonadales	f__Pseudomonadaceae	g__Pseudomonas	s__Pseudomonas fluorescens A506
ASV087053	k__Bacteria	p__Proteobacteria	c__Alphaproteobacteria	o__Rhizobiales	f__Xanthobacteraceae	g__Afipia	s__Afipia genosp. 1
ASV087556	k__Bacteria	p__Proteobacteria	c__Gammaproteobacteria	o__Enterobacterales	f__Enterobacteriaceae	g__Escherichia-Shigella	s__Escherichia coli
ASV087854	k__Bacteria	p__Proteobacteria	c__Gammaproteobacteria	o__Enterobacterales	f__Enterobacteriaceae	g__Escherichia-Shigella	s__Escherichia coli
ASV087977	k__Bacteria	p__Proteobacteria	c__Gammaproteobacteria	o__Pseudomonadales	f__Pseudomonadaceae	g__Pseudomonas	s__Pseudomonas sp. FDAARGOS_380
ASV088059	k__Bacteria	p__Bacteroidota	c__Bacteroidia	o__Flavobacteriales	f__Weeksellaceae	g__Chryseobacterium	s__
ASV088224	k__Bacteria	p__Actinobacteriota	c__Actinobacteria	o__Propionibacteriales	f__Propionibacteriaceae	g__Cutibacterium	s__
ASV088988	k__Bacteria	p__Bacteroidota	c__Bacteroidia	o__Flavobacteriales	f__Weeksellaceae	g__Chryseobacterium	s__
ASV089438	k__Bacteria	p__Proteobacteria	c__Gammaproteobacteria	o__Pseudomonadales	f__Pseudomonadaceae	g__Pseudomonas	s__Pseudomonas psychrophila
ASV090350	k__Bacteria	p__Bacteroidota	c__Bacteroidia	o__Flavobacteriales	f__Weeksellaceae	g__Chryseobacterium	s__
ASV090882	k__Bacteria	p__Actinobacteriota	c__Actinobacteria	o__Micrococcales	f__Micrococcaceae	g__Kocuria	s__Kocuria rhizophila
ASV091318	k__Bacteria	p__Proteobacteria	c__Gammaproteobacteria	o__Burkholderiales	f__Burkholderiaceae	g__Ralstonia	s__Ralstonia insidiosa
ASV093081	k__Bacteria	p__Proteobacteria	c__Alphaproteobacteria	o__Rhizobiales	f__Xanthobacteraceae	g__Bradyrhizobium	s__Bradyrhizobium sp. SEMIA 6399
ASV093161	k__Bacteria	p__Actinobacteriota	c__Actinobacteria	o__Propionibacteriales	f__Propionibacteriaceae	g__Cutibacterium	s__
ASV093280	k__Bacteria	p__Proteobacteria	c__Gammaproteobacteria	o__Pseudomonadales	f__Pseudomonadaceae	g__Pseudomonas	s__Pseudomonas versuta
ASV095161	k__Bacteria	p__Actinobacteriota	c__Actinobacteria	o__Micrococcales	f__Dermacoccaceae	g__Dermacoccus	s__Dermacoccus nishinomiyaensis
ASV095321	k__Bacteria	p__Proteobacteria	c__Alphaproteobacteria	o__Rhizobiales	f__Xanthobacteraceae	g__Afipia	s__Afipia genosp. 1
ASV095358	k__Bacteria	p__Proteobacteria	c__Alphaproteobacteria	o__Rhizobiales	f__Xanthobacteraceae	g__Bradyrhizobium	s__Bradyrhizobium sp. SEMIA 6399
ASV095373	k__Bacteria	p__Actinobacteriota	c__Actinobacteria	o__Propionibacteriales	f__Propionibacteriaceae	g__Cutibacterium	s__
ASV095686	k__Bacteria	p__Bacteroidota	c__Bacteroidia	o__Flavobacteriales	f__Weeksellaceae	g__Chryseobacterium	s__
ASV095854	k__Bacteria	p__Bacteroidota	c__Bacteroidia	o__Flavobacteriales	f__Weeksellaceae	g__Chryseobacterium	s__
ASV095953	k__Bacteria	p__Proteobacteria	c__Gammaproteobacteria	o__Pseudomonadales	f__Moraxellaceae	g__Psychrobacter	s__Psychrobacter fozii
ASV095987	k__Bacteria	p__Proteobacteria	c__Gammaproteobacteria	o__Pseudomonadales	f__Pseudomonadaceae	g__Pseudomonas	s__
ASV096112	k__Bacteria	p__Proteobacteria	c__Gammaproteobacteria	o__Pseudomonadales	f__Pseudomonadaceae	g__Pseudomonas	s__Pseudomonas sp. FDAARGOS_380
ASV097029	k__Bacteria	p__Proteobacteria	c__Gammaproteobacteria	o__Pseudomonadales	f__Pseudomonadaceae	g__Pseudomonas	s__Pseudomonas sp. S09G 359
ASV097702	k__Bacteria	p__Proteobacteria	c__Gammaproteobacteria	o__Pseudomonadales	f__Pseudomonadaceae	g__Pseudomonas	s__Pseudomonas versuta
ASV097711	k__Bacteria	p__Bacteroidota	c__Bacteroidia	o__Flavobacteriales	f__Weeksellaceae	g__Chryseobacterium	s__
ASV097829	k__Bacteria	p__Proteobacteria	c__Gammaproteobacteria	o__Pseudomonadales	f__Pseudomonadaceae	g__Pseudomonas	s__Pseudomonas sp. LG1E9
ASV097882	k__Bacteria	p__Actinobacteriota	c__Actinobacteria	o__Propionibacteriales	f__Propionibacteriaceae	g__Cutibacterium	s__
ASV098078	k__Bacteria	p__Proteobacteria	c__Gammaproteobacteria	o__Pseudomonadales	f__Pseudomonadaceae	g__Pseudomonas	s__Pseudomonas antarctica
ASV098516	k__Bacteria	p__Bacteroidota	c__Bacteroidia	o__Flavobacteriales	f__Weeksellaceae	g__Chryseobacterium	s__
ASV098858	k__Bacteria	p__Bacteroidota	c__Bacteroidia	o__Flavobacteriales	f__Weeksellaceae	g__Chryseobacterium	s__
ASV099080	k__Bacteria	p__Proteobacteria	c__Alphaproteobacteria	o__Rhizobiales	f__Xanthobacteraceae	g__Afipia	s__Afipia genosp. 1
ASV100289	k__Bacteria	p__Bacteroidota	c__Bacteroidia	o__Flavobacteriales	f__Weeksellaceae	g__Chryseobacterium	s__
ASV100390	k__Bacteria	p__Bacteroidota	c__Bacteroidia	o__Flavobacteriales	f__Weeksellaceae	g__Chryseobacterium	s__
ASV100458	k__Bacteria	p__Proteobacteria	c__Gammaproteobacteria	o__Pseudomonadales	f__Pseudomonadaceae	g__Pseudomonas	s__Pseudomonas sp. FDAARGOS_380
ASV101501	k__Bacteria	p__Actinobacteriota	c__Actinobacteria	o__Corynebacteriales	f__Mycobacteriaceae	g__Mycobacterium	s__
ASV101526	k__Bacteria	p__Actinobacteriota	c__Actinobacteria	o__Micrococcales	f__Dermacoccaceae	g__Dermacoccus	s__Dermacoccus nishinomiyaensis
ASV101683	k__Bacteria	p__Bacteroidota	c__Bacteroidia	o__Flavobacteriales	f__Weeksellaceae	g__Chryseobacterium	s__
ASV101821	k__Bacteria	p__Actinobacteriota	c__Actinobacteria	o__Propionibacteriales	f__Propionibacteriaceae	g__Cutibacterium	s__
ASV102143	k__Bacteria	p__Proteobacteria	c__Gammaproteobacteria	o__Enterobacterales	f__Erwiniaceae	g__Pantoea	s__Pantoea agglomerans
ASV102597	k__Bacteria	p__Proteobacteria	c__Gammaproteobacteria	o__Pseudomonadales	f__Pseudomonadaceae	g__Pseudomonas	s__Pseudomonas lurida
ASV102615	k__Bacteria	p__Proteobacteria	c__Gammaproteobacteria	o__Pseudomonadales	f__Pseudomonadaceae	g__Pseudomonas	s__Pseudomonas sp. LG1E9
ASV103294	k__Bacteria	p__Bacteroidota	c__Bacteroidia	o__Flavobacteriales	f__Weeksellaceae	g__Chryseobacterium	s__
ASV104548	k__Bacteria	p__Proteobacteria	c__Gammaproteobacteria	o__Pseudomonadales	f__Pseudomonadaceae	g__Pseudomonas	s__Pseudomonas versuta
ASV104610	k__Bacteria	p__Proteobacteria	c__Gammaproteobacteria	o__Pseudomonadales	f__Pseudomonadaceae	g__Pseudomonas	s__Pseudomonas versuta
ASV104841	k__Bacteria	p__Proteobacteria	c__Gammaproteobacteria	o__Pseudomonadales	f__Pseudomonadaceae	g__Pseudomonas	s__Pseudomonas sp. FDAARGOS_380
ASV105167	k__Bacteria	p__Proteobacteria	c__Gammaproteobacteria	o__Pseudomonadales	f__Pseudomonadaceae	g__Pseudomonas	s__Pseudomonas sp. FDAARGOS_380
ASV105312	k__Bacteria	p__Proteobacteria	c__Gammaproteobacteria	o__Pseudomonadales	f__Pseudomonadaceae	g__Pseudomonas	s__Pseudomonas versuta
ASV106238	k__Bacteria	p__Proteobacteria	c__Alphaproteobacteria	o__Rhizobiales	f__Xanthobacteraceae	g__Afipia	s__Afipia genosp. 1
ASV106792	k__Bacteria	p__Proteobacteria	c__Gammaproteobacteria	o__Pseudomonadales	f__Pseudomonadaceae	g__Pseudomonas	s__Pseudomonas antarctica
ASV107012	k__Bacteria	p__Actinobacteriota	c__Actinobacteria	o__Propionibacteriales	f__Propionibacteriaceae	g__Cutibacterium	s__
ASV107719	k__Bacteria	p__Actinobacteriota	c__Actinobacteria	o__Micrococcales	f__Dermacoccaceae	g__Dermacoccus	s__Dermacoccus nishinomiyaensis
ASV108064	k__Bacteria	p__Proteobacteria	c__Gammaproteobacteria	o__Pseudomonadales	f__Pseudomonadaceae	g__Pseudomonas	s__Pseudomonas antarctica
ASV108724	k__Bacteria	p__Actinobacteriota	c__Actinobacteria	o__Propionibacteriales	f__Propionibacteriaceae	g__Cutibacterium	s__
ASV109368	k__Bacteria	p__Firmicutes	c__Bacilli	o__Lactobacillales	f__Carnobacteriaceae	g__Carnobacterium	s__
ASV109541	k__Bacteria	p__Proteobacteria	c__Gammaproteobacteria	o__Pseudomonadales	f__Pseudomonadaceae	g__Pseudomonas	s__Pseudomonas versuta
ASV109592	k__Bacteria	p__Bacteroidota	c__Bacteroidia	o__Flavobacteriales	f__Weeksellaceae	g__Chryseobacterium	s__
ASV109663	k__Bacteria	p__Proteobacteria	c__Alphaproteobacteria	o__Rhizobiales	f__Xanthobacteraceae	g__Afipia	s__Afipia genosp. 1
ASV110287	k__Bacteria	p__Firmicutes	c__Clostridia	o__Clostridiales	f__Clostridiaceae	g__Clostridium sensu stricto 10	s__
ASV112025	k__Bacteria	p__Bacteroidota	c__Bacteroidia	o__Flavobacteriales	f__Weeksellaceae	g__Chryseobacterium	s__
ASV113574	k__Bacteria	p__Proteobacteria	c__Gammaproteobacteria	o__Pseudomonadales	f__Pseudomonadaceae	g__Pseudomonas	s__Pseudomonas sp. S09G 359
ASV113748	k__Bacteria	p__Bacteroidota	c__Bacteroidia	o__Flavobacteriales	f__Weeksellaceae	g__Chryseobacterium	s__
ASV114050	k__Bacteria	p__Firmicutes	c__Bacilli	o__Lactobacillales	f__Carnobacteriaceae	g__Carnobacterium	s__
ASV114182	k__Bacteria	p__Bacteroidota	c__Bacteroidia	o__Flavobacteriales	f__Weeksellaceae	g__Chryseobacterium	s__
ASV114663	k__Bacteria	p__Proteobacteria	c__Gammaproteobacteria	o__Enterobacterales	f__Enterobacteriaceae	g__Escherichia-Shigella	s__Escherichia coli
ASV114887	k__Bacteria	p__Proteobacteria	c__Alphaproteobacteria	o__Rhizobiales	f__Xanthobacteraceae	g__Afipia	s__Afipia genosp. 1
ASV115429	k__Bacteria	p__Actinobacteriota	c__Actinobacteria	o__Micrococcales	f__Dermacoccaceae	g__Dermacoccus	s__Dermacoccus nishinomiyaensis
ASV115560	k__Bacteria	p__Proteobacteria	c__Gammaproteobacteria	o__Pseudomonadales	f__Pseudomonadaceae	g__Pseudomonas	s__Pseudomonas antarctica
ASV115933	k__Bacteria	p__Bacteroidota	c__Bacteroidia	o__Flavobacteriales	f__Weeksellaceae	g__Chryseobacterium	s__
ASV116265	k__Bacteria	p__Proteobacteria	c__Gammaproteobacteria	o__Pseudomonadales	f__Pseudomonadaceae	g__Pseudomonas	s__Pseudomonas sp. FDAARGOS_380
ASV116423	k__Bacteria	p__Proteobacteria	c__Gammaproteobacteria	o__Pseudomonadales	f__Pseudomonadaceae	g__Pseudomonas	s__Pseudomonas sp. FDAARGOS_380
ASV116784	k__Bacteria	p__Actinobacteriota	c__Actinobacteria	o__Propionibacteriales	f__Propionibacteriaceae	g__Cutibacterium	s__
ASV116910	k__Bacteria	p__Firmicutes	c__Bacilli	o__Lactobacillales	f__Carnobacteriaceae	g__Carnobacterium	s__
ASV117788	k__Bacteria	p__Proteobacteria	c__Gammaproteobacteria	o__Enterobacterales	f__Enterobacteriaceae	g__Klebsiella	s__Klebsiella michiganensis
ASV118731	k__Bacteria	p__Proteobacteria	c__Alphaproteobacteria	o__Rhizobiales	f__Xanthobacteraceae	g__Afipia	s__Afipia genosp. 1
ASV118955	k__Bacteria	p__Proteobacteria	c__Alphaproteobacteria	o__Rhizobiales	f__Rhizobiaceae	g__Mesorhizobium	s__Mesorhizobium sp. NBIMC_P2-C1
ASV119180	k__Bacteria	p__Proteobacteria	c__Gammaproteobacteria	o__Pseudomonadales	f__Pseudomonadaceae	g__Pseudomonas	s__Pseudomonas versuta
ASV119882	k__Bacteria	p__Proteobacteria	c__Gammaproteobacteria	o__Pseudomonadales	f__Pseudomonadaceae	g__Pseudomonas	s__Pseudomonas versuta
ASV119978	k__Bacteria	p__Proteobacteria	c__Alphaproteobacteria	o__Rhizobiales	f__Xanthobacteraceae	g__Afipia	s__Afipia genosp. 1
ASV120673	k__Bacteria	p__Proteobacteria	c__Gammaproteobacteria	o__Burkholderiales	f__Oxalobacteraceae	g__Massilia	s__
ASV120677	k__Bacteria	p__Actinobacteriota	c__Actinobacteria	o__Propionibacteriales	f__Propionibacteriaceae	g__Cutibacterium	s__
ASV120856	k__Bacteria	p__Bacteroidota	c__Bacteroidia	o__Flavobacteriales	f__Weeksellaceae	g__Chryseobacterium	s__
ASV120905	k__Bacteria	p__Proteobacteria	c__Gammaproteobacteria	o__Pseudomonadales	f__Pseudomonadaceae	g__Pseudomonas	s__Pseudomonas fluorescens
ASV122865	k__Bacteria	p__Bacteroidota	c__Bacteroidia	o__Flavobacteriales	f__Weeksellaceae	g__Chryseobacterium	s__
ASV123046	k__Bacteria	p__Bacteroidota	c__Bacteroidia	o__Flavobacteriales	f__Weeksellaceae	g__Chryseobacterium	s__
ASV124333	k__Bacteria	p__Actinobacteriota	c__Actinobacteria	o__Corynebacteriales	f__Corynebacteriaceae	g__Lawsonella	s__
ASV125128	k__Bacteria	p__Actinobacteriota	c__Actinobacteria	o__Propionibacteriales	f__Propionibacteriaceae	g__Cutibacterium	s__
ASV125371	k__Bacteria	p__Proteobacteria	c__Alphaproteobacteria	o__Rhizobiales	f__Xanthobacteraceae	g__Afipia	s__Afipia genosp. 1
ASV125521	k__Bacteria	p__Bacteroidota	c__Bacteroidia	o__Flavobacteriales	f__Weeksellaceae	g__Chryseobacterium	s__
ASV126747	k__Bacteria	p__Actinobacteriota	c__Actinobacteria	o__Propionibacteriales	f__Propionibacteriaceae	g__Cutibacterium	s__
ASV126758	k__Bacteria	p__Actinobacteriota	c__Actinobacteria	o__Propionibacteriales	f__Propionibacteriaceae	g__Cutibacterium	s__
ASV127833	k__Bacteria	p__Firmicutes	c__Bacilli	o__Lactobacillales	f__Carnobacteriaceae	g__Carnobacterium	s__
ASV128820	k__Bacteria	p__Bacteroidota	c__Bacteroidia	o__Flavobacteriales	f__Weeksellaceae	g__Chryseobacterium	s__
ASV129509	k__Bacteria	p__Proteobacteria	c__Gammaproteobacteria	o__Pseudomonadales	f__Pseudomonadaceae	g__Pseudomonas	s__Pseudomonas sp. MYb193
ASV130074	k__Bacteria	p__Actinobacteriota	c__Actinobacteria	o__Propionibacteriales	f__Propionibacteriaceae	g__Cutibacterium	s__
ASV130195	k__Bacteria	p__Proteobacteria	c__Gammaproteobacteria	o__Enterobacterales	f__Enterobacteriaceae	g__Escherichia-Shigella	s__Escherichia coli
ASV130536	k__Bacteria	p__Proteobacteria	c__Gammaproteobacteria	o__Pseudomonadales	f__Pseudomonadaceae	g__Pseudomonas	s__Pseudomonas versuta
ASV130976	k__Bacteria	p__Bacteroidota	c__Bacteroidia	o__Flavobacteriales	f__Weeksellaceae	g__Chryseobacterium	s__
ASV131643	k__Bacteria	p__Bacteroidota	c__Bacteroidia	o__Flavobacteriales	f__Weeksellaceae	g__Chryseobacterium	s__
ASV132661	k__Bacteria	p__Proteobacteria	c__Gammaproteobacteria	o__Pseudomonadales	f__Pseudomonadaceae	g__Pseudomonas	s__Pseudomonas versuta
ASV133503	k__Bacteria	p__Bacteroidota	c__Bacteroidia	o__Flavobacteriales	f__Weeksellaceae	g__Chryseobacterium	s__
ASV134803	k__Bacteria	p__Actinobacteriota	c__Actinobacteria	o__Propionibacteriales	f__Propionibacteriaceae	g__Cutibacterium	s__
ASV135532	k__Bacteria	p__Actinobacteriota	c__Actinobacteria	o__Propionibacteriales	f__Propionibacteriaceae	g__Cutibacterium	s__
ASV136671	k__Bacteria	p__Proteobacteria	c__Alphaproteobacteria	o__Rhizobiales	f__Xanthobacteraceae	g__Afipia	s__Afipia genosp. 1
ASV136781	k__Bacteria	p__Proteobacteria	c__Alphaproteobacteria	o__Rhizobiales	f__Xanthobacteraceae	g__Bradyrhizobium	s__Bradyrhizobium sp. SEMIA 6399
ASV138684	k__Bacteria	p__Firmicutes	c__Bacilli	o__Lactobacillales	f__Carnobacteriaceae	g__Carnobacterium	s__
ASV138789	k__Bacteria	p__Proteobacteria	c__Gammaproteobacteria	o__Burkholderiales	f__Burkholderiaceae	g__Ralstonia	s__Ralstonia insidiosa
ASV138797	k__Bacteria	p__Actinobacteriota	c__Actinobacteria	o__Propionibacteriales	f__Propionibacteriaceae	g__Cutibacterium	s__
ASV139103	k__Bacteria	p__Proteobacteria	c__Gammaproteobacteria	o__Pseudomonadales	f__Pseudomonadaceae	g__Pseudomonas	s__Pseudomonas versuta
ASV139109	k__Bacteria	p__Bacteroidota	c__Bacteroidia	o__Flavobacteriales	f__Weeksellaceae	g__Chryseobacterium	s__
ASV139508	k__Bacteria	p__Proteobacteria	c__Alphaproteobacteria	o__Sphingomonadales	f__Sphingomonadaceae	g__Sphingopyxis	s__
ASV139923	k__Bacteria	p__Actinobacteriota	c__Actinobacteria	o__Propionibacteriales	f__Propionibacteriaceae	g__Cutibacterium	s__
ASV140018	k__Bacteria	p__Firmicutes	c__Bacilli	o__Lactobacillales	f__Catellicoccaceae	g__Catellicoccus	s__
ASV141162	k__Bacteria	p__Actinobacteriota	c__Actinobacteria	o__Propionibacteriales	f__Propionibacteriaceae	g__Cutibacterium	s__
ASV141271	k__Bacteria	p__Proteobacteria	c__Gammaproteobacteria	o__Enterobacterales	f__Erwiniaceae	g__Pantoea	s__Pantoea agglomerans
ASV141821	k__Bacteria	p__Bacteroidota	c__Bacteroidia	o__Flavobacteriales	f__Weeksellaceae	g__Chryseobacterium	s__
ASV141901	k__Bacteria	p__Proteobacteria	c__Gammaproteobacteria	o__Pseudomonadales	f__Pseudomonadaceae	g__Pseudomonas	s__Pseudomonas psychrophila
ASV142479	k__Bacteria	p__Actinobacteriota	c__Actinobacteria	o__Propionibacteriales	f__Propionibacteriaceae	g__Cutibacterium	s__
ASV142670	k__Bacteria	p__Proteobacteria	c__Alphaproteobacteria	o__Rhizobiales	f__Xanthobacteraceae	g__Afipia	s__Afipia genosp. 1
ASV143072	k__Bacteria	p__Bacteroidota	c__Bacteroidia	o__Flavobacteriales	f__Weeksellaceae	g__Chryseobacterium	s__
ASV143127	k__Bacteria	p__Bacteroidota	c__Bacteroidia	o__Flavobacteriales	f__Weeksellaceae	g__Chryseobacterium	s__
ASV143197	k__Bacteria	p__Actinobacteriota	c__Actinobacteria	o__Propionibacteriales	f__Propionibacteriaceae	g__Cutibacterium	s__
ASV143932	k__Bacteria	p__Actinobacteriota	c__Actinobacteria	o__Propionibacteriales	f__Propionibacteriaceae	g__Cutibacterium	s__
ASV144507	k__Bacteria	p__Proteobacteria	c__Gammaproteobacteria	o__Pseudomonadales	f__Pseudomonadaceae	g__Pseudomonas	s__Pseudomonas antarctica
ASV144792	k__Bacteria	p__Bacteroidota	c__Bacteroidia	o__Flavobacteriales	f__Weeksellaceae	g__Chryseobacterium	s__
ASV145232	k__Bacteria	p__Bacteroidota	c__Bacteroidia	o__Flavobacteriales	f__Weeksellaceae	g__Chryseobacterium	s__
ASV146765	k__Bacteria	p__Proteobacteria	c__Gammaproteobacteria	o__Pseudomonadales	f__Pseudomonadaceae	g__Pseudomonas	s__Pseudomonas fluorescens A506
ASV147448	k__Bacteria	p__Proteobacteria	c__Alphaproteobacteria	o__Rhizobiales	f__Xanthobacteraceae	g__Bradyrhizobium	s__Bradyrhizobium sp. SEMIA 6399
ASV147743	k__Bacteria	p__Bacteroidota	c__Bacteroidia	o__Flavobacteriales	f__Weeksellaceae	g__Chryseobacterium	s__
ASV148234	k__Bacteria	p__Bacteroidota	c__Bacteroidia	o__Flavobacteriales	f__Weeksellaceae	g__Chryseobacterium	s__
ASV148506	k__Bacteria	p__Actinobacteriota	c__Actinobacteria	o__Propionibacteriales	f__Propionibacteriaceae	g__Cutibacterium	s__
ASV148805	k__Bacteria	p__Proteobacteria	c__Gammaproteobacteria	o__Pseudomonadales	f__Pseudomonadaceae	g__Pseudomonas	s__Pseudomonas antarctica
ASV149225	k__Bacteria	p__Bacteroidota	c__Bacteroidia	o__Flavobacteriales	f__Weeksellaceae	g__Chryseobacterium	s__
ASV150053	k__Bacteria	p__Proteobacteria	c__Gammaproteobacteria	o__Pseudomonadales	f__Pseudomonadaceae	g__Pseudomonas	s__Pseudomonas antarctica
ASV150485	k__Bacteria	p__Proteobacteria	c__Gammaproteobacteria	o__Pseudomonadales	f__Pseudomonadaceae	g__Pseudomonas	s__Pseudomonas versuta
ASV151049	k__Bacteria	p__Proteobacteria	c__Gammaproteobacteria	o__Pseudomonadales	f__Pseudomonadaceae	g__Pseudomonas	s__Pseudomonas antarctica
ASV151325	k__Bacteria	p__Bacteroidota	c__Bacteroidia	o__Flavobacteriales	f__Weeksellaceae	g__Chryseobacterium	s__
ASV151643	k__Bacteria	p__Actinobacteriota	c__Actinobacteria	o__Propionibacteriales	f__Propionibacteriaceae	g__Cutibacterium	s__
ASV151928	k__Bacteria	p__Proteobacteria	c__Gammaproteobacteria	o__Pseudomonadales	f__Moraxellaceae	g__Psychrobacter	s__Psychrobacter alimentarius
ASV152260	k__Bacteria	p__Proteobacteria	c__Gammaproteobacteria	o__Pseudomonadales	f__Pseudomonadaceae	g__Pseudomonas	s__Pseudomonas antarctica
ASV152290	k__Bacteria	p__Bacteroidota	c__Bacteroidia	o__Flavobacteriales	f__Weeksellaceae	g__Chryseobacterium	s__
ASV152567	k__Bacteria	p__Proteobacteria	c__Gammaproteobacteria	o__Enterobacterales	f__Enterobacteriaceae	g__Escherichia-Shigella	s__Escherichia coli
ASV152573	k__Bacteria	p__Firmicutes	c__Bacilli	o__Lactobacillales	f__Catellicoccaceae	g__Catellicoccus	s__
ASV152622	k__Bacteria	p__Proteobacteria	c__Gammaproteobacteria	o__Pseudomonadales	f__Pseudomonadaceae	g__Pseudomonas	s__Pseudomonas antarctica
ASV153429	k__Bacteria	p__Bacteroidota	c__Bacteroidia	o__Flavobacteriales	f__Weeksellaceae	g__Chryseobacterium	s__
ASV153962	k__Bacteria	p__Bacteroidota	c__Bacteroidia	o__Flavobacteriales	f__Weeksellaceae	g__Chryseobacterium	s__
ASV154429	k__Bacteria	p__Firmicutes	c__Bacilli	o__Staphylococcales	f__Staphylococcaceae	g__Staphylococcus	s__Staphylococcus capitis
ASV154512	k__Bacteria	p__Bacteroidota	c__Bacteroidia	o__Flavobacteriales	f__Weeksellaceae	g__Chryseobacterium	s__
ASV155336	k__Bacteria	p__Bacteroidota	c__Bacteroidia	o__Flavobacteriales	f__Weeksellaceae	g__Chryseobacterium	s__
ASV155714	k__Bacteria	p__Actinobacteriota	c__Actinobacteria	o__Propionibacteriales	f__Propionibacteriaceae	g__Cutibacterium	s__
ASV156712	k__Bacteria	p__Proteobacteria	c__Alphaproteobacteria	o__Rhizobiales	f__Xanthobacteraceae	g__Afipia	s__Afipia genosp. 1
ASV157051	k__Bacteria	p__Proteobacteria	c__Gammaproteobacteria	o__Pseudomonadales	f__Moraxellaceae	g__Psychrobacter	s__Psychrobacter alimentarius
ASV157254	k__Bacteria	p__Proteobacteria	c__Gammaproteobacteria	o__Pseudomonadales	f__Pseudomonadaceae	g__Pseudomonas	s__Pseudomonas antarctica
ASV157452	k__Bacteria	p__Proteobacteria	c__Gammaproteobacteria	o__Pseudomonadales	f__Pseudomonadaceae	g__Pseudomonas	s__Pseudomonas fluorescens A506
ASV157589	k__Bacteria	p__Bacteroidota	c__Bacteroidia	o__Flavobacteriales	f__Weeksellaceae	g__Chryseobacterium	s__
ASV158338	k__Bacteria	p__Proteobacteria	c__Alphaproteobacteria	o__Rhizobiales	f__Xanthobacteraceae	g__Bradyrhizobium	s__Bradyrhizobium sp. SEMIA 6399
ASV158890	k__Bacteria	p__Proteobacteria	c__Gammaproteobacteria	o__Enterobacterales	f__Erwiniaceae	g__Pantoea	s__Pantoea agglomerans
ASV159763	k__Bacteria	p__Actinobacteriota	c__Actinobacteria	o__Propionibacteriales	f__Propionibacteriaceae	g__Cutibacterium	s__
ASV160672	k__Bacteria	p__Proteobacteria	c__Gammaproteobacteria	o__Pseudomonadales	f__Pseudomonadaceae	g__Pseudomonas	s__Pseudomonas sp. FDAARGOS_380
ASV160703	k__Bacteria	p__Bacteroidota	c__Bacteroidia	o__Flavobacteriales	f__Weeksellaceae	g__Chryseobacterium	s__
ASV160943	k__Bacteria	p__Firmicutes	c__Clostridia	o__Clostridiales	f__Clostridiaceae	g__Clostridium sensu stricto 10	s__
ASV161457	k__Bacteria	p__Proteobacteria	c__Gammaproteobacteria	o__Burkholderiales	f__Burkholderiaceae	g__Ralstonia	s__Ralstonia insidiosa
ASV161700	k__Bacteria	p__Proteobacteria	c__Gammaproteobacteria	o__Pseudomonadales	f__Moraxellaceae	g__Acinetobacter	s__
ASV161795	k__Bacteria	p__Proteobacteria	c__Gammaproteobacteria	o__Pseudomonadales	f__Pseudomonadaceae	g__Pseudomonas	s__Pseudomonas antarctica
ASV161894	k__Bacteria	p__Actinobacteriota	c__Actinobacteria	o__Propionibacteriales	f__Propionibacteriaceae	g__Cutibacterium	s__
ASV162316	k__Bacteria	p__Bacteroidota	c__Bacteroidia	o__Flavobacteriales	f__Weeksellaceae	g__Chryseobacterium	s__
ASV163051	k__Bacteria	p__Bacteroidota	c__Bacteroidia	o__Flavobacteriales	f__Weeksellaceae	g__Chryseobacterium	s__
ASV163227	k__Bacteria	p__Proteobacteria	c__Gammaproteobacteria	o__Pseudomonadales	f__Pseudomonadaceae	g__Pseudomonas	s__Pseudomonas versuta
ASV163344	k__Bacteria	p__Actinobacteriota	c__Actinobacteria	o__Micrococcales	f__Dermacoccaceae	g__Dermacoccus	s__Dermacoccus nishinomiyaensis
ASV163709	k__Bacteria	p__Proteobacteria	c__Alphaproteobacteria	o__Sphingomonadales	f__Sphingomonadaceae	g__Sphingopyxis	s__
ASV164842	k__Bacteria	p__Bacteroidota	c__Bacteroidia	o__Flavobacteriales	f__Weeksellaceae	g__Chryseobacterium	s__
ASV165271	k__Bacteria	p__Proteobacteria	c__Alphaproteobacteria	o__Sphingomonadales	f__Sphingomonadaceae	g__Sphingopyxis	s__
ASV165284	k__Bacteria	p__Proteobacteria	c__Alphaproteobacteria	o__Rhizobiales	f__Xanthobacteraceae	g__Afipia	s__Afipia genosp. 1
ASV167250	k__Bacteria	p__Firmicutes	c__Bacilli	o__Staphylococcales	f__Staphylococcaceae	g__Staphylococcus	s__Staphylococcus capitis
ASV167268	k__Bacteria	p__Bacteroidota	c__Bacteroidia	o__Flavobacteriales	f__Weeksellaceae	g__Chryseobacterium	s__
ASV168521	k__Bacteria	p__Proteobacteria	c__Alphaproteobacteria	o__Rhizobiales	f__Xanthobacteraceae	g__Afipia	s__Afipia genosp. 1
ASV168943	k__Bacteria	p__Proteobacteria	c__Gammaproteobacteria	o__Pseudomonadales	f__Pseudomonadaceae	g__Pseudomonas	s__Pseudomonas antarctica
ASV169095	k__Bacteria	p__Actinobacteriota	c__Actinobacteria	o__Propionibacteriales	f__Propionibacteriaceae	g__Cutibacterium	s__
ASV169579	k__Bacteria	p__Bacteroidota	c__Bacteroidia	o__Flavobacteriales	f__Weeksellaceae	g__Chryseobacterium	s__
ASV170663	k__Bacteria	p__Actinobacteriota	c__Actinobacteria	o__Micrococcales	f__Dermacoccaceae	g__Dermacoccus	s__Dermacoccus nishinomiyaensis
ASV171312	k__Bacteria	p__Proteobacteria	c__Gammaproteobacteria	o__Pseudomonadales	f__Pseudomonadaceae	g__Pseudomonas	s__Pseudomonas antarctica
ASV171494	k__Bacteria	p__Proteobacteria	c__Gammaproteobacteria	o__Pseudomonadales	f__Moraxellaceae	g__Psychrobacter	s__Psychrobacter alimentarius
ASV171984	k__Bacteria	p__Proteobacteria	c__Gammaproteobacteria	o__Pseudomonadales	f__Pseudomonadaceae	g__Pseudomonas	s__Pseudomonas versuta
ASV172685	k__Bacteria	p__Proteobacteria	c__Gammaproteobacteria	o__Pseudomonadales	f__Pseudomonadaceae	g__Pseudomonas	s__Pseudomonas antarctica
ASV174107	k__Bacteria	p__Actinobacteriota	c__Actinobacteria	o__Propionibacteriales	f__Propionibacteriaceae	g__Cutibacterium	s__
ASV174242	k__Bacteria	p__Bacteroidota	c__Bacteroidia	o__Flavobacteriales	f__Weeksellaceae	g__Chryseobacterium	s__
ASV174243	k__Bacteria	p__Actinobacteriota	c__Actinobacteria	o__Micrococcales	f__Dermacoccaceae	g__Dermacoccus	s__Dermacoccus nishinomiyaensis
ASV174514	k__Bacteria	p__Bacteroidota	c__Bacteroidia	o__Flavobacteriales	f__Weeksellaceae	g__Chryseobacterium	s__
ASV174746	k__Bacteria	p__Actinobacteriota	c__Actinobacteria	o__Propionibacteriales	f__Propionibacteriaceae	g__Cutibacterium	s__
ASV176837	k__Bacteria	p__Proteobacteria	c__Gammaproteobacteria	o__Pseudomonadales	f__Pseudomonadaceae	g__Pseudomonas	s__Pseudomonas versuta
ASV177759	k__Bacteria	p__Bacteroidota	c__Bacteroidia	o__Flavobacteriales	f__Weeksellaceae	g__Chryseobacterium	s__
ASV178025	k__Bacteria	p__Actinobacteriota	c__Actinobacteria	o__Propionibacteriales	f__Propionibacteriaceae	g__Cutibacterium	s__
ASV178407	k__Bacteria	p__Proteobacteria	c__Alphaproteobacteria	o__Rhizobiales	f__Xanthobacteraceae	g__Afipia	s__Afipia genosp. 1
ASV179534	k__Bacteria	p__Proteobacteria	c__Alphaproteobacteria	o__Rhizobiales	f__Xanthobacteraceae	g__Afipia	s__Afipia genosp. 1
ASV180978	k__Bacteria	p__Proteobacteria	c__Gammaproteobacteria	o__Enterobacterales	f__Enterobacteriaceae	g__Escherichia-Shigella	s__Escherichia albertii
ASV180995	k__Bacteria	p__Proteobacteria	c__Alphaproteobacteria	o__Sphingomonadales	f__Sphingomonadaceae	g__Sphingopyxis	s__
ASV181131	k__Bacteria	p__Proteobacteria	c__Gammaproteobacteria	o__Pseudomonadales	f__Pseudomonadaceae	g__Pseudomonas	s__Pseudomonas sp. LG1E9
ASV181324	k__Bacteria	p__Bacteroidota	c__Bacteroidia	o__Flavobacteriales	f__Weeksellaceae	g__Chryseobacterium	s__
ASV181368	k__Bacteria	p__Bacteroidota	c__Bacteroidia	o__Flavobacteriales	f__Weeksellaceae	g__Chryseobacterium	s__
ASV182146	k__Bacteria	p__Proteobacteria	c__Gammaproteobacteria	o__Pseudomonadales	f__Pseudomonadaceae	g__Pseudomonas	s__Pseudomonas fluorescens A506
ASV183594	k__Bacteria	p__Proteobacteria	c__Gammaproteobacteria	o__Pseudomonadales	f__Pseudomonadaceae	g__Pseudomonas	s__Pseudomonas versuta
ASV184105	k__Bacteria	p__Actinobacteriota	c__Actinobacteria	o__Micrococcales	f__Dermacoccaceae	g__Dermacoccus	s__Dermacoccus nishinomiyaensis
ASV184106	k__Bacteria	p__Firmicutes	c__Bacilli	o__Staphylococcales	f__Staphylococcaceae	g__Staphylococcus	s__Staphylococcus capitis
ASV184829	k__Bacteria	p__Actinobacteriota	c__Actinobacteria	o__Propionibacteriales	f__Propionibacteriaceae	g__Cutibacterium	s__
ASV184851	k__Bacteria	p__Firmicutes	c__Bacilli	o__Lactobacillales	f__Carnobacteriaceae	g__Carnobacterium	s__
ASV184986	k__Bacteria	p__Proteobacteria	c__Gammaproteobacteria	o__Pseudomonadales	f__Pseudomonadaceae	g__Pseudomonas	s__Pseudomonas fluorescens
ASV185267	k__Bacteria	p__Actinobacteriota	c__Actinobacteria	o__Propionibacteriales	f__Propionibacteriaceae	g__Cutibacterium	s__
ASV185443	k__Bacteria	p__Bacteroidota	c__Bacteroidia	o__Flavobacteriales	f__Weeksellaceae	g__Chryseobacterium	s__
ASV186583	k__Bacteria	p__Actinobacteriota	c__Actinobacteria	o__Propionibacteriales	f__Propionibacteriaceae	g__Cutibacterium	s__
ASV186618	k__Bacteria	p__Proteobacteria	c__Gammaproteobacteria	o__Pseudomonadales	f__Pseudomonadaceae	g__Pseudomonas	s__Pseudomonas sp. FDAARGOS_380
ASV189470	k__Bacteria	p__Proteobacteria	c__Gammaproteobacteria	o__Pseudomonadales	f__Pseudomonadaceae	g__Pseudomonas	s__Pseudomonas sp. FDAARGOS_380
ASV190366	k__Bacteria	p__Firmicutes	c__Bacilli	o__Lactobacillales	f__Carnobacteriaceae	g__Carnobacterium	s__
ASV191517	k__Bacteria	p__Actinobacteriota	c__Actinobacteria	o__Propionibacteriales	f__Propionibacteriaceae	g__Cutibacterium	s__
ASV191526	k__Bacteria	p__Proteobacteria	c__Gammaproteobacteria	o__Pseudomonadales	f__Pseudomonadaceae	g__Pseudomonas	s__Pseudomonas lurida
ASV191539	k__Bacteria	p__Proteobacteria	c__Gammaproteobacteria	o__Pseudomonadales	f__Pseudomonadaceae	g__Pseudomonas	s__Pseudomonas sp. FDAARGOS_380
ASV191808	k__Bacteria	p__Actinobacteriota	c__Actinobacteria	o__Propionibacteriales	f__Propionibacteriaceae	g__Cutibacterium	s__
ASV192048	k__Bacteria	p__Actinobacteriota	c__Actinobacteria	o__Propionibacteriales	f__Propionibacteriaceae	g__Cutibacterium	s__
ASV192712	k__Bacteria	p__Actinobacteriota	c__Actinobacteria	o__Propionibacteriales	f__Propionibacteriaceae	g__Cutibacterium	s__
ASV193718	k__Bacteria	p__Firmicutes	c__Bacilli	o__Lactobacillales	f__Carnobacteriaceae	g__Carnobacterium	s__
ASV193982	k__Bacteria	p__Bacteroidota	c__Bacteroidia	o__Flavobacteriales	f__Weeksellaceae	g__Chryseobacterium	s__
ASV194064	k__Bacteria	p__Proteobacteria	c__Gammaproteobacteria	o__Pseudomonadales	f__Pseudomonadaceae	g__Pseudomonas	s__
ASV194627	k__Bacteria	p__Proteobacteria	c__Alphaproteobacteria	o__Rhizobiales	f__Xanthobacteraceae	g__Afipia	s__Afipia genosp. 1
ASV194759	k__Bacteria	p__Proteobacteria	c__Gammaproteobacteria	o__Pseudomonadales	f__Moraxellaceae	g__Psychrobacter	s__Psychrobacter alimentarius
ASV194872	k__Bacteria	p__Bacteroidota	c__Bacteroidia	o__Flavobacteriales	f__Weeksellaceae	g__Chryseobacterium	s__
ASV197076	k__Bacteria	p__Proteobacteria	c__Alphaproteobacteria	o__Rhizobiales	f__Xanthobacteraceae	g__Afipia	s__Afipia genosp. 1
ASV197211	k__Bacteria	p__Proteobacteria	c__Gammaproteobacteria	o__Enterobacterales	f__Erwiniaceae	g__Pantoea	s__Pantoea agglomerans
ASV198277	k__Bacteria	p__Proteobacteria	c__Alphaproteobacteria	o__Rhizobiales	f__Xanthobacteraceae	g__Afipia	s__Afipia genosp. 1
ASV199656	k__Bacteria	p__Proteobacteria	c__Gammaproteobacteria	o__Pseudomonadales	f__Pseudomonadaceae	g__Pseudomonas	s__Pseudomonas sp. FDAARGOS_380
ASV200183	k__Bacteria	p__Proteobacteria	c__Gammaproteobacteria	o__Pseudomonadales	f__Pseudomonadaceae	g__Pseudomonas	s__Pseudomonas versuta
ASV200398	k__Bacteria	p__Actinobacteriota	c__Actinobacteria	o__Propionibacteriales	f__Propionibacteriaceae	g__Cutibacterium	s__
ASV201947	k__Bacteria	p__Firmicutes	c__Bacilli	o__Lactobacillales	f__Carnobacteriaceae	g__Carnobacterium	s__
ASV201992	k__Bacteria	p__Proteobacteria	c__Gammaproteobacteria	o__Pseudomonadales	f__Pseudomonadaceae	g__Pseudomonas	s__Pseudomonas sp. FDAARGOS_380
ASV202130	k__Bacteria	p__Proteobacteria	c__Alphaproteobacteria	o__Sphingomonadales	f__Sphingomonadaceae	g__Sphingopyxis	s__
ASV202175	k__Bacteria	p__Firmicutes	c__Bacilli	o__Lactobacillales	f__Carnobacteriaceae	g__Carnobacterium	s__
ASV202379	k__Bacteria	p__Proteobacteria	c__Gammaproteobacteria	o__Pseudomonadales	f__Pseudomonadaceae	g__Pseudomonas	s__Pseudomonas versuta
ASV202517	k__Bacteria	p__Bacteroidota	c__Bacteroidia	o__Flavobacteriales	f__Weeksellaceae	g__Chryseobacterium	s__
ASV202721	k__Bacteria	p__Actinobacteriota	c__Actinobacteria	o__Corynebacteriales	f__Corynebacteriaceae	g__Lawsonella	s__
ASV202774	k__Bacteria	p__Actinobacteriota	c__Actinobacteria	o__Propionibacteriales	f__Propionibacteriaceae	g__Cutibacterium	s__
ASV202786	k__Bacteria	p__Proteobacteria	c__Gammaproteobacteria	o__Pseudomonadales	f__Pseudomonadaceae	g__Pseudomonas	s__Pseudomonas fluorescens
ASV203080	k__Bacteria	p__Actinobacteriota	c__Actinobacteria	o__Propionibacteriales	f__Propionibacteriaceae	g__Cutibacterium	s__
ASV203452	k__Bacteria	p__Proteobacteria	c__Alphaproteobacteria	o__Rhizobiales	f__Beijerinckiaceae	g__Bosea	s__Bosea sp. CRIB-12
ASV203956	k__Bacteria	p__Proteobacteria	c__Gammaproteobacteria	o__Pseudomonadales	f__Pseudomonadaceae	g__Pseudomonas	s__Pseudomonas sp. FDAARGOS_380
ASV204088	k__Bacteria	p__Bacteroidota	c__Bacteroidia	o__Flavobacteriales	f__Weeksellaceae	g__Chryseobacterium	s__
ASV204347	k__Bacteria	p__Proteobacteria	c__Gammaproteobacteria	o__Pseudomonadales	f__Pseudomonadaceae	g__Pseudomonas	s__Pseudomonas versuta
ASV204931	k__Bacteria	p__Actinobacteriota	c__Actinobacteria	o__Propionibacteriales	f__Nocardioidaceae	g__Nocardioides	s__Nocardioides sp. CCGE2221
ASV205985	k__Bacteria	p__Proteobacteria	c__Alphaproteobacteria	o__Rhizobiales	f__Xanthobacteraceae	g__Afipia	s__Afipia genosp. 1
ASV206705	k__Bacteria	p__Actinobacteriota	c__Actinobacteria	o__Propionibacteriales	f__Propionibacteriaceae	g__Cutibacterium	s__
ASV207332	k__Bacteria	p__Bacteroidota	c__Bacteroidia	o__Flavobacteriales	f__Weeksellaceae	g__Chryseobacterium	s__
ASV207935	k__Bacteria	p__Proteobacteria	c__Alphaproteobacteria	o__Rhizobiales	f__Xanthobacteraceae	g__Bradyrhizobium	s__Bradyrhizobium sp. SEMIA 6399
ASV208658	k__Bacteria	p__Proteobacteria	c__Gammaproteobacteria	o__Pseudomonadales	f__Pseudomonadaceae	g__Pseudomonas	s__Pseudomonas antarctica
ASV208714	k__Bacteria	p__Actinobacteriota	c__Actinobacteria	o__Propionibacteriales	f__Propionibacteriaceae	g__Cutibacterium	s__
ASV209036	k__Bacteria	p__Bacteroidota	c__Bacteroidia	o__Flavobacteriales	f__Weeksellaceae	g__Chryseobacterium	s__
ASV209284	k__Bacteria	p__Actinobacteriota	c__Actinobacteria	o__Propionibacteriales	f__Propionibacteriaceae	g__Cutibacterium	s__
ASV209400	k__Bacteria	p__Proteobacteria	c__Alphaproteobacteria	o__Rhizobiales	f__Xanthobacteraceae	g__Afipia	s__Afipia genosp. 1
ASV209749	k__Bacteria	p__Proteobacteria	c__Gammaproteobacteria	o__Pseudomonadales	f__Pseudomonadaceae	g__Pseudomonas	s__Pseudomonas versuta
ASV209894	k__Bacteria	p__Actinobacteriota	c__Actinobacteria	o__Propionibacteriales	f__Propionibacteriaceae	g__Cutibacterium	s__
ASV210393	k__Bacteria	p__Proteobacteria	c__Gammaproteobacteria	o__Enterobacterales	f__Erwiniaceae	g__Pantoea	s__Pantoea agglomerans
ASV210698	k__Bacteria	p__Proteobacteria	c__Gammaproteobacteria	o__Pseudomonadales	f__Pseudomonadaceae	g__Pseudomonas	s__Pseudomonas fluorescens
ASV210707	k__Bacteria	p__Proteobacteria	c__Gammaproteobacteria	o__Pseudomonadales	f__Pseudomonadaceae	g__Pseudomonas	s__Pseudomonas versuta
ASV210810	k__Bacteria	p__Proteobacteria	c__Gammaproteobacteria	o__Pseudomonadales	f__Pseudomonadaceae	g__Pseudomonas	s__Pseudomonas antarctica
ASV210992	k__Bacteria	p__Actinobacteriota	c__Actinobacteria	o__Propionibacteriales	f__Propionibacteriaceae	g__Cutibacterium	s__
ASV211109	k__Bacteria	p__Bacteroidota	c__Bacteroidia	o__Flavobacteriales	f__Weeksellaceae	g__Chryseobacterium	s__
ASV211288	k__Bacteria	p__Proteobacteria	c__Alphaproteobacteria	o__Rhizobiales	f__Xanthobacteraceae	g__Afipia	s__Afipia genosp. 1
ASV211290	k__Bacteria	p__Bacteroidota	c__Bacteroidia	o__Flavobacteriales	f__Weeksellaceae	g__Chryseobacterium	s__
ASV211944	k__Bacteria	p__Proteobacteria	c__Gammaproteobacteria	o__Pseudomonadales	f__Pseudomonadaceae	g__Pseudomonas	s__Pseudomonas versuta
ASV211995	k__Bacteria	p__Proteobacteria	c__Gammaproteobacteria	o__Pseudomonadales	f__Pseudomonadaceae	g__Pseudomonas	s__Pseudomonas sp. FDAARGOS_380
ASV213055	k__Bacteria	p__Actinobacteriota	c__Actinobacteria	o__Propionibacteriales	f__Propionibacteriaceae	g__Cutibacterium	s__
ASV213229	k__Bacteria	p__Campylobacterota	c__Campylobacteria	o__Campylobacterales	f__Campylobacteraceae	g__Campylobacter	s__Campylobacter upsaliensis RM3195
ASV213315	k__Bacteria	p__Bacteroidota	c__Bacteroidia	o__Flavobacteriales	f__Weeksellaceae	g__Chryseobacterium	s__
ASV213435	k__Bacteria	p__Firmicutes	c__Bacilli	o__Lactobacillales	f__Carnobacteriaceae	g__Carnobacterium	s__
ASV213777	k__Bacteria	p__Proteobacteria	c__Alphaproteobacteria	o__Rhizobiales	f__Xanthobacteraceae	g__Afipia	s__Afipia genosp. 1
ASV213988	k__Bacteria	p__Proteobacteria	c__Alphaproteobacteria	o__Sphingomonadales	f__Sphingomonadaceae	g__Sphingopyxis	s__
ASV214659	k__Bacteria	p__Proteobacteria	c__Gammaproteobacteria	o__Pseudomonadales	f__Pseudomonadaceae	g__Pseudomonas	s__Pseudomonas sp. FDAARGOS_380
ASV214941	k__Bacteria	p__Proteobacteria	c__Alphaproteobacteria	o__Rhizobiales	f__Xanthobacteraceae	g__Afipia	s__Afipia genosp. 1
ASV215490	k__Bacteria	p__Proteobacteria	c__Alphaproteobacteria	o__Rhizobiales	f__Beijerinckiaceae	g__Bosea	s__Bosea sp. CRIB-12
ASV215755	k__Bacteria	p__Bacteroidota	c__Bacteroidia	o__Flavobacteriales	f__Weeksellaceae	g__Chryseobacterium	s__
ASV216305	k__Bacteria	p__Proteobacteria	c__Alphaproteobacteria	o__Rhizobiales	f__Xanthobacteraceae	g__Bradyrhizobium	s__Bradyrhizobium sp. SEMIA 6399
ASV217263	k__Bacteria	p__Bacteroidota	c__Bacteroidia	o__Flavobacteriales	f__Weeksellaceae	g__Chryseobacterium	s__
ASV217363	k__Bacteria	p__Firmicutes	c__Bacilli	o__Lactobacillales	f__Carnobacteriaceae	g__Carnobacterium	s__
ASV217878	k__Bacteria	p__Bacteroidota	c__Bacteroidia	o__Flavobacteriales	f__Weeksellaceae	g__Chryseobacterium	s__
ASV218070	k__Bacteria	p__Proteobacteria	c__Gammaproteobacteria	o__Enterobacterales	f__Enterobacteriaceae	g__Escherichia-Shigella	s__Escherichia albertii
ASV218313	k__Bacteria	p__Proteobacteria	c__Alphaproteobacteria	o__Rhizobiales	f__Xanthobacteraceae	g__Bradyrhizobium	s__Bradyrhizobium sp. SEMIA 6399
ASV219029	k__Bacteria	p__Bacteroidota	c__Bacteroidia	o__Flavobacteriales	f__Weeksellaceae	g__Chryseobacterium	s__
ASV219154	k__Bacteria	p__Actinobacteriota	c__Actinobacteria	o__Propionibacteriales	f__Propionibacteriaceae	g__Cutibacterium	s__
ASV220152	k__Bacteria	p__Actinobacteriota	c__Actinobacteria	o__Corynebacteriales	f__Mycobacteriaceae	g__Mycobacterium	s__
ASV220644	k__Bacteria	p__Actinobacteriota	c__Actinobacteria	o__Micrococcales	f__Dermacoccaceae	g__Dermacoccus	s__Dermacoccus nishinomiyaensis
ASV220870	k__Bacteria	p__Bacteroidota	c__Bacteroidia	o__Flavobacteriales	f__Weeksellaceae	g__Chryseobacterium	s__
ASV221034	k__Bacteria	p__Proteobacteria	c__Gammaproteobacteria	o__Burkholderiales	f__Burkholderiaceae	g__Lautropia	s__
ASV221400	k__Bacteria	p__Actinobacteriota	c__Actinobacteria	o__Propionibacteriales	f__Propionibacteriaceae	g__Cutibacterium	s__
ASV221438	k__Bacteria	p__Actinobacteriota	c__Actinobacteria	o__Propionibacteriales	f__Propionibacteriaceae	g__Cutibacterium	s__
ASV221485	k__Bacteria	p__Actinobacteriota	c__Actinobacteria	o__Propionibacteriales	f__Propionibacteriaceae	g__Cutibacterium	s__
ASV221691	k__Bacteria	p__Proteobacteria	c__Alphaproteobacteria	o__Rhizobiales	f__Xanthobacteraceae	g__Afipia	s__Afipia genosp. 1
ASV221758	k__Bacteria	p__Actinobacteriota	c__Actinobacteria	o__Propionibacteriales	f__Propionibacteriaceae	g__Cutibacterium	s__
ASV222649	k__Bacteria	p__Bacteroidota	c__Bacteroidia	o__Flavobacteriales	f__Weeksellaceae	g__Chryseobacterium	s__
ASV223169	k__Bacteria	p__Proteobacteria	c__Gammaproteobacteria	o__Pseudomonadales	f__Pseudomonadaceae	g__Pseudomonas	s__Pseudomonas sp. FDAARGOS_380
ASV223374	k__Bacteria	p__Proteobacteria	c__Alphaproteobacteria	o__Rhizobiales	f__Xanthobacteraceae	g__Bradyrhizobium	s__Bradyrhizobium sp. SEMIA 6399
ASV223513	k__Bacteria	p__Proteobacteria	c__Gammaproteobacteria	o__Pseudomonadales	f__Pseudomonadaceae	g__Pseudomonas	s__Pseudomonas antarctica
ASV223899	k__Bacteria	p__Proteobacteria	c__Alphaproteobacteria	o__Rhizobiales	f__Xanthobacteraceae	g__Bradyrhizobium	s__Bradyrhizobium sp. SEMIA 6399
ASV224259	k__Bacteria	p__Actinobacteriota	c__Actinobacteria	o__Propionibacteriales	f__Propionibacteriaceae	g__Cutibacterium	s__
ASV224452	k__Bacteria	p__Firmicutes	c__Bacilli	o__Lactobacillales	f__Carnobacteriaceae	g__Carnobacterium	s__
ASV224697	k__Bacteria	p__Proteobacteria	c__Alphaproteobacteria	o__Rhizobiales	f__Xanthobacteraceae	g__Afipia	s__Afipia genosp. 1
ASV224700	k__Bacteria	p__Actinobacteriota	c__Actinobacteria	o__Propionibacteriales	f__Propionibacteriaceae	g__Cutibacterium	s__
ASV224876	k__Bacteria	p__Bacteroidota	c__Bacteroidia	o__Flavobacteriales	f__Weeksellaceae	g__Chryseobacterium	s__
ASV224938	k__Bacteria	p__Bacteroidota	c__Bacteroidia	o__Flavobacteriales	f__Weeksellaceae	g__Chryseobacterium	s__
ASV225198	k__Bacteria	p__Proteobacteria	c__Gammaproteobacteria	o__Pseudomonadales	f__Pseudomonadaceae	g__Pseudomonas	s__Pseudomonas fluorescens A506
ASV225521	k__Bacteria	p__Actinobacteriota	c__Actinobacteria	o__Propionibacteriales	f__Propionibacteriaceae	g__Cutibacterium	s__
ASV225773	k__Bacteria	p__Proteobacteria	c__Alphaproteobacteria	o__Rhizobiales	f__Xanthobacteraceae	g__Afipia	s__Afipia genosp. 1
ASV226843	k__Bacteria	p__Bacteroidota	c__Bacteroidia	o__Flavobacteriales	f__Weeksellaceae	g__Chryseobacterium	s__
ASV226957	k__Bacteria	p__Actinobacteriota	c__Actinobacteria	o__Propionibacteriales	f__Propionibacteriaceae	g__Cutibacterium	s__
ASV227272	k__Bacteria	p__Proteobacteria	c__Gammaproteobacteria	o__Pseudomonadales	f__Pseudomonadaceae	g__Pseudomonas	s__Pseudomonas antarctica
ASV227584	k__Bacteria	p__Proteobacteria	c__Gammaproteobacteria	o__Enterobacterales	f__Enterobacteriaceae	g__Escherichia-Shigella	s__Escherichia coli
ASV227621	k__Bacteria	p__Firmicutes	c__Bacilli	o__Lactobacillales	f__Carnobacteriaceae	g__Carnobacterium	s__
ASV227946	k__Bacteria	p__Actinobacteriota	c__Actinobacteria	o__Propionibacteriales	f__Propionibacteriaceae	g__Cutibacterium	s__
ASV228209	k__Bacteria	p__Proteobacteria	c__Gammaproteobacteria	o__Pseudomonadales	f__Pseudomonadaceae	g__Pseudomonas	s__Pseudomonas sp. FDAARGOS_380
ASV228456	k__Bacteria	p__Proteobacteria	c__Gammaproteobacteria	o__Pseudomonadales	f__Pseudomonadaceae	g__Pseudomonas	s__Pseudomonas sp. FDAARGOS_380
ASV229554	k__Bacteria	p__Actinobacteriota	c__Actinobacteria	o__Propionibacteriales	f__Propionibacteriaceae	g__Cutibacterium	s__
ASV231005	k__Bacteria	p__Proteobacteria	c__Alphaproteobacteria	o__Rhizobiales	f__Xanthobacteraceae	g__Afipia	s__Afipia genosp. 1
ASV231736	k__Bacteria	p__Actinobacteriota	c__Actinobacteria	o__Propionibacteriales	f__Propionibacteriaceae	g__Cutibacterium	s__
ASV231790	k__Bacteria	p__Proteobacteria	c__Gammaproteobacteria	o__Pseudomonadales	f__Pseudomonadaceae	g__Pseudomonas	s__Pseudomonas sp. FDAARGOS_380
ASV232101	k__Bacteria	p__Proteobacteria	c__Alphaproteobacteria	o__Rhizobiales	f__Xanthobacteraceae	g__Afipia	s__Afipia genosp. 1
ASV233500	k__Bacteria	p__Firmicutes	c__Bacilli	o__Lactobacillales	f__Enterococcaceae	g__Enterococcus	s__
ASV234374	k__Bacteria	p__Actinobacteriota	c__Actinobacteria	o__Propionibacteriales	f__Propionibacteriaceae	g__Cutibacterium	s__
ASV234563	k__Bacteria	p__Actinobacteriota	c__Actinobacteria	o__Propionibacteriales	f__Propionibacteriaceae	g__Cutibacterium	s__
ASV234873	k__Bacteria	p__Actinobacteriota	c__Actinobacteria	o__Propionibacteriales	f__Propionibacteriaceae	g__Cutibacterium	s__
ASV235284	k__Bacteria	p__Proteobacteria	c__Alphaproteobacteria	o__Rhizobiales	f__Xanthobacteraceae	g__Afipia	s__Afipia genosp. 1
ASV235606	k__Bacteria	p__Proteobacteria	c__Gammaproteobacteria	o__Pseudomonadales	f__Pseudomonadaceae	g__Pseudomonas	s__Pseudomonas antarctica
ASV235705	k__Bacteria	p__Proteobacteria	c__Gammaproteobacteria	o__Pseudomonadales	f__Pseudomonadaceae	g__Pseudomonas	s__Pseudomonas sp. FDAARGOS_380
ASV236510	k__Bacteria	p__Proteobacteria	c__Gammaproteobacteria	o__Pseudomonadales	f__Pseudomonadaceae	g__Pseudomonas	s__Pseudomonas fluorescens A506
ASV236814	k__Bacteria	p__Actinobacteriota	c__Actinobacteria	o__Propionibacteriales	f__Propionibacteriaceae	g__Cutibacterium	s__
ASV237084	k__Bacteria	p__Proteobacteria	c__Gammaproteobacteria	o__Pseudomonadales	f__Pseudomonadaceae	g__Pseudomonas	s__Pseudomonas versuta
ASV237580	k__Bacteria	p__Bacteroidota	c__Bacteroidia	o__Flavobacteriales	f__Weeksellaceae	g__Chryseobacterium	s__
ASV237869	k__Bacteria	p__Proteobacteria	c__Gammaproteobacteria	o__Pseudomonadales	f__Pseudomonadaceae	g__Pseudomonas	s__Pseudomonas sp. FDAARGOS_380
ASV238068	k__Bacteria	p__Bacteroidota	c__Bacteroidia	o__Flavobacteriales	f__Weeksellaceae	g__Chryseobacterium	s__
ASV238158	k__Bacteria	p__Proteobacteria	c__Alphaproteobacteria	o__Rhizobiales	f__Xanthobacteraceae	g__Afipia	s__Afipia genosp. 1
ASV238889	k__Bacteria	p__Proteobacteria	c__Gammaproteobacteria	o__Pseudomonadales	f__Pseudomonadaceae	g__Pseudomonas	s__Pseudomonas lurida
ASV239036	k__Bacteria	p__Bacteroidota	c__Bacteroidia	o__Flavobacteriales	f__Weeksellaceae	g__Chryseobacterium	s__
ASV239040	k__Bacteria	p__Proteobacteria	c__Alphaproteobacteria	o__Rhizobiales	f__Xanthobacteraceae	g__Afipia	s__Afipia genosp. 1
ASV239651	k__Bacteria	p__Actinobacteriota	c__Actinobacteria	o__Propionibacteriales	f__Propionibacteriaceae	g__Cutibacterium	s__
ASV240407	k__Bacteria	p__Proteobacteria	c__Gammaproteobacteria	o__Pseudomonadales	f__Pseudomonadaceae	g__Pseudomonas	s__Pseudomonas versuta
ASV241049	k__Bacteria	p__Bacteroidota	c__Bacteroidia	o__Flavobacteriales	f__Weeksellaceae	g__Chryseobacterium	s__
ASV241650	k__Bacteria	p__Proteobacteria	c__Gammaproteobacteria	o__Pseudomonadales	f__Moraxellaceae	g__Psychrobacter	s__Psychrobacter alimentarius
ASV242036	k__Bacteria	p__Actinobacteriota	c__Actinobacteria	o__Propionibacteriales	f__Propionibacteriaceae	g__Cutibacterium	s__
ASV242184	k__Bacteria	p__Proteobacteria	c__Gammaproteobacteria	o__Pseudomonadales	f__Pseudomonadaceae	g__Pseudomonas	s__Pseudomonas fluorescens
ASV242266	k__Bacteria	p__Actinobacteriota	c__Actinobacteria	o__Propionibacteriales	f__Propionibacteriaceae	g__Cutibacterium	s__
ASV242507	k__Bacteria	p__Actinobacteriota	c__Actinobacteria	o__Corynebacteriales	f__Corynebacteriaceae	g__Lawsonella	s__
ASV242902	k__Bacteria	p__Proteobacteria	c__Gammaproteobacteria	o__Enterobacterales	f__Enterobacteriaceae	g__Escherichia-Shigella	s__Escherichia coli
ASV243412	k__Bacteria	p__Bacteroidota	c__Bacteroidia	o__Flavobacteriales	f__Weeksellaceae	g__Chryseobacterium	s__
ASV243558	k__Bacteria	p__Bacteroidota	c__Bacteroidia	o__Flavobacteriales	f__Weeksellaceae	g__Chryseobacterium	s__
ASV244330	k__Bacteria	p__Proteobacteria	c__Alphaproteobacteria	o__Rhizobiales	f__Xanthobacteraceae	g__Afipia	s__Afipia genosp. 1
ASV244533	k__Bacteria	p__Actinobacteriota	c__Actinobacteria	o__Propionibacteriales	f__Propionibacteriaceae	g__Cutibacterium	s__
ASV245186	k__Bacteria	p__Proteobacteria	c__Alphaproteobacteria	o__Sphingomonadales	f__Sphingomonadaceae	g__Sphingopyxis	s__
ASV245404	k__Bacteria	p__Firmicutes	c__Bacilli	o__Lactobacillales	f__Carnobacteriaceae	g__Carnobacterium	s__
ASV245486	k__Bacteria	p__Bacteroidota	c__Bacteroidia	o__Flavobacteriales	f__Weeksellaceae	g__Chryseobacterium	s__
ASV245584	k__Bacteria	p__Actinobacteriota	c__Actinobacteria	o__Propionibacteriales	f__Propionibacteriaceae	g__Cutibacterium	s__
ASV245834	k__Bacteria	p__Actinobacteriota	c__Actinobacteria	o__Propionibacteriales	f__Propionibacteriaceae	g__Cutibacterium	s__
ASV245945	k__Bacteria	p__Proteobacteria	c__Alphaproteobacteria	o__Rhizobiales	f__Xanthobacteraceae	g__Afipia	s__Afipia genosp. 1
ASV246443	k__Bacteria	p__Bacteroidota	c__Bacteroidia	o__Flavobacteriales	f__Weeksellaceae	g__Chryseobacterium	s__
ASV246718	k__Bacteria	p__Actinobacteriota	c__Actinobacteria	o__Propionibacteriales	f__Propionibacteriaceae	g__Cutibacterium	s__
ASV246978	k__Bacteria	p__Proteobacteria	c__Gammaproteobacteria	o__Enterobacterales	f__Erwiniaceae	g__Pantoea	s__Pantoea agglomerans
ASV247960	k__Bacteria	p__Actinobacteriota	c__Actinobacteria	o__Micrococcales	f__Dermacoccaceae	g__Dermacoccus	s__Dermacoccus nishinomiyaensis
ASV248823	k__Bacteria	p__Bacteroidota	c__Bacteroidia	o__Flavobacteriales	f__Weeksellaceae	g__Chryseobacterium	s__
ASV249039	k__Bacteria	p__Proteobacteria	c__Gammaproteobacteria	o__Enterobacterales	f__Enterobacteriaceae	g__Escherichia-Shigella	s__Escherichia coli
ASV249590	k__Bacteria	p__Proteobacteria	c__Gammaproteobacteria	o__Pseudomonadales	f__Moraxellaceae	g__Psychrobacter	s__Psychrobacter alimentarius
ASV249665	k__Bacteria	p__Proteobacteria	c__Gammaproteobacteria	o__Pseudomonadales	f__Pseudomonadaceae	g__Pseudomonas	s__Pseudomonas versuta
ASV250826	k__Bacteria	p__Proteobacteria	c__Gammaproteobacteria	o__Pseudomonadales	f__Moraxellaceae	g__Psychrobacter	s__Psychrobacter alimentarius
ASV251316	k__Bacteria	p__Proteobacteria	c__Gammaproteobacteria	o__Pseudomonadales	f__Moraxellaceae	g__Psychrobacter	s__Psychrobacter alimentarius
ASV251591	k__Bacteria	p__Proteobacteria	c__Gammaproteobacteria	o__Pseudomonadales	f__Pseudomonadaceae	g__Pseudomonas	s__Pseudomonas sp. FDAARGOS_380
ASV251770	k__Bacteria	p__Proteobacteria	c__Gammaproteobacteria	o__Pseudomonadales	f__Pseudomonadaceae	g__Pseudomonas	s__Pseudomonas sp. FDAARGOS_380
ASV252045	k__Bacteria	p__Bacteroidota	c__Bacteroidia	o__Flavobacteriales	f__Weeksellaceae	g__Chryseobacterium	s__
ASV253102	k__Bacteria	p__Actinobacteriota	c__Actinobacteria	o__Propionibacteriales	f__Propionibacteriaceae	g__Cutibacterium	s__
ASV253151	k__Bacteria	p__Actinobacteriota	c__Actinobacteria	o__Propionibacteriales	f__Propionibacteriaceae	g__Cutibacterium	s__
ASV253320	k__Bacteria	p__Actinobacteriota	c__Actinobacteria	o__Corynebacteriales	f__Mycobacteriaceae	g__Mycobacterium	s__
ASV254304	k__Bacteria	p__Actinobacteriota	c__Actinobacteria	o__Propionibacteriales	f__Propionibacteriaceae	g__Cutibacterium	s__
ASV254804	k__Bacteria	p__Proteobacteria	c__Gammaproteobacteria	o__Pseudomonadales	f__Pseudomonadaceae	g__Pseudomonas	s__Pseudomonas versuta
ASV255247	k__Bacteria	p__Proteobacteria	c__Alphaproteobacteria	o__Rhizobiales	f__Rhizobiaceae	g__Ochrobactrum	s__Ochrobactrum anthropi
ASV256066	k__Bacteria	p__Proteobacteria	c__Alphaproteobacteria	o__Rhizobiales	f__Xanthobacteraceae	g__Afipia	s__Afipia genosp. 1
ASV256281	k__Bacteria	p__Proteobacteria	c__Gammaproteobacteria	o__Pseudomonadales	f__Pseudomonadaceae	g__Pseudomonas	s__
ASV256309	k__Bacteria	p__Proteobacteria	c__Gammaproteobacteria	o__Pseudomonadales	f__Pseudomonadaceae	g__Pseudomonas	s__Pseudomonas fluorescens A506
ASV256359	k__Bacteria	p__Proteobacteria	c__Alphaproteobacteria	o__Rhizobiales	f__Xanthobacteraceae	g__Afipia	s__Afipia genosp. 1
ASV256621	k__Bacteria	p__Actinobacteriota	c__Actinobacteria	o__Propionibacteriales	f__Propionibacteriaceae	g__Cutibacterium	s__
ASV256939	k__Bacteria	p__Actinobacteriota	c__Actinobacteria	o__Propionibacteriales	f__Propionibacteriaceae	g__Cutibacterium	s__
ASV257270	k__Bacteria	p__Actinobacteriota	c__Actinobacteria	o__Propionibacteriales	f__Propionibacteriaceae	g__Cutibacterium	s__
ASV258975	k__Bacteria	p__Actinobacteriota	c__Actinobacteria	o__Propionibacteriales	f__Propionibacteriaceae	g__Cutibacterium	s__
ASV259504	k__Bacteria	p__Bacteroidota	c__Bacteroidia	o__Flavobacteriales	f__Weeksellaceae	g__Chryseobacterium	s__
ASV259572	k__Bacteria	p__Actinobacteriota	c__Actinobacteria	o__Propionibacteriales	f__Propionibacteriaceae	g__Cutibacterium	s__
ASV259588	k__Bacteria	p__Actinobacteriota	c__Actinobacteria	o__Corynebacteriales	f__Mycobacteriaceae	g__Mycobacterium	s__
ASV259615	k__Bacteria	p__Proteobacteria	c__Alphaproteobacteria	o__Rhizobiales	f__Xanthobacteraceae	g__Bradyrhizobium	s__Bradyrhizobium sp. SEMIA 6399
ASV260189	k__Bacteria	p__Proteobacteria	c__Gammaproteobacteria	o__Enterobacterales	f__Enterobacteriaceae	g__Escherichia-Shigella	s__Escherichia coli
ASV260277	k__Bacteria	p__Proteobacteria	c__Gammaproteobacteria	o__Pseudomonadales	f__Pseudomonadaceae	g__Pseudomonas	s__Pseudomonas sp. FDAARGOS_380
ASV260345	k__Bacteria	p__Firmicutes	c__Clostridia	o__Clostridiales	f__Clostridiaceae	g__Clostridium sensu stricto 10	s__
ASV260540	k__Bacteria	p__Proteobacteria	c__Alphaproteobacteria	o__Rhizobiales	f__Xanthobacteraceae	g__Afipia	s__Afipia genosp. 1
ASV260588	k__Bacteria	p__Actinobacteriota	c__Actinobacteria	o__Propionibacteriales	f__Propionibacteriaceae	g__Cutibacterium	s__
ASV260737	k__Bacteria	p__Proteobacteria	c__Gammaproteobacteria	o__Pseudomonadales	f__Pseudomonadaceae	g__Pseudomonas	s__Pseudomonas fluorescens A506
ASV261788	k__Bacteria	p__Actinobacteriota	c__Actinobacteria	o__Propionibacteriales	f__Propionibacteriaceae	g__Cutibacterium	s__
ASV261953	k__Bacteria	p__Proteobacteria	c__Gammaproteobacteria	o__Pseudomonadales	f__Pseudomonadaceae	g__Pseudomonas	s__Pseudomonas sp. FDAARGOS_380
ASV262085	k__Bacteria	p__Bacteroidota	c__Bacteroidia	o__Flavobacteriales	f__Weeksellaceae	g__Chryseobacterium	s__
ASV262625	k__Bacteria	p__Actinobacteriota	c__Actinobacteria	o__Propionibacteriales	f__Propionibacteriaceae	g__Cutibacterium	s__
ASV264055	k__Bacteria	p__Actinobacteriota	c__Actinobacteria	o__Micrococcales	f__Dermacoccaceae	g__Dermacoccus	s__Dermacoccus nishinomiyaensis
ASV264201	k__Bacteria	p__Bacteroidota	c__Bacteroidia	o__Flavobacteriales	f__Weeksellaceae	g__Chryseobacterium	s__
ASV264238	k__Bacteria	p__Actinobacteriota	c__Actinobacteria	o__Propionibacteriales	f__Propionibacteriaceae	g__Cutibacterium	s__
ASV264448	k__Bacteria	p__Actinobacteriota	c__Actinobacteria	o__Propionibacteriales	f__Propionibacteriaceae	g__Cutibacterium	s__
ASV264546	k__Bacteria	p__Actinobacteriota	c__Actinobacteria	o__Propionibacteriales	f__Propionibacteriaceae	g__Cutibacterium	s__
ASV265478	k__Bacteria	p__Bacteroidota	c__Bacteroidia	o__Flavobacteriales	f__Weeksellaceae	g__Chryseobacterium	s__
ASV265591	k__Bacteria	p__Firmicutes	c__Bacilli	o__Lactobacillales	f__Carnobacteriaceae	g__Carnobacterium	s__
ASV265738	k__Bacteria	p__Actinobacteriota	c__Actinobacteria	o__Propionibacteriales	f__Propionibacteriaceae	g__Cutibacterium	s__
ASV266144	k__Bacteria	p__Proteobacteria	c__Gammaproteobacteria	o__Pseudomonadales	f__Pseudomonadaceae	g__Pseudomonas	s__Pseudomonas sp. FDAARGOS_380
ASV266790	k__Bacteria	p__Actinobacteriota	c__Actinobacteria	o__Propionibacteriales	f__Propionibacteriaceae	g__Cutibacterium	s__
ASV266930	k__Bacteria	p__Proteobacteria	c__Gammaproteobacteria	o__Pseudomonadales	f__Moraxellaceae	g__Acinetobacter	s__Acinetobacter johnsonii XBB1
ASV267638	k__Bacteria	p__Proteobacteria	c__Gammaproteobacteria	o__Enterobacterales	f__Enterobacteriaceae	g__Escherichia-Shigella	s__Escherichia albertii
ASV268202	k__Bacteria	p__Proteobacteria	c__Gammaproteobacteria	o__Pseudomonadales	f__Pseudomonadaceae	g__Pseudomonas	s__
ASV270633	k__Bacteria	p__Proteobacteria	c__Gammaproteobacteria	o__Pseudomonadales	f__Pseudomonadaceae	g__Pseudomonas	s__Pseudomonas sp. FDAARGOS_380
ASV272077	k__Bacteria	p__Actinobacteriota	c__Actinobacteria	o__Propionibacteriales	f__Propionibacteriaceae	g__Cutibacterium	s__
ASV273825	k__Bacteria	p__Firmicutes	c__Bacilli	o__Lactobacillales	f__Carnobacteriaceae	g__Carnobacterium	s__
ASV274230	k__Bacteria	p__Proteobacteria	c__Gammaproteobacteria	o__Enterobacterales	f__Enterobacteriaceae	g__Klebsiella	s__Klebsiella michiganensis
ASV274855	k__Bacteria	p__Proteobacteria	c__Gammaproteobacteria	o__Pseudomonadales	f__Moraxellaceae	g__Psychrobacter	s__Psychrobacter alimentarius
ASV274900	k__Bacteria	p__Proteobacteria	c__Gammaproteobacteria	o__Pseudomonadales	f__Pseudomonadaceae	g__Pseudomonas	s__Pseudomonas sp. LG1E9
ASV276434	k__Bacteria	p__Actinobacteriota	c__Actinobacteria	o__Propionibacteriales	f__Propionibacteriaceae	g__Cutibacterium	s__
ASV276823	k__Bacteria	p__Bacteroidota	c__Bacteroidia	o__Flavobacteriales	f__Weeksellaceae	g__Chryseobacterium	s__
ASV277043	k__Bacteria	p__Proteobacteria	c__Alphaproteobacteria	o__Sphingomonadales	f__Sphingomonadaceae	g__Sphingopyxis	s__
ASV277391	k__Bacteria	p__Bacteroidota	c__Bacteroidia	o__Flavobacteriales	f__Weeksellaceae	g__Chryseobacterium	s__
ASV277786	k__Bacteria	p__Actinobacteriota	c__Actinobacteria	o__Propionibacteriales	f__Propionibacteriaceae	g__Cutibacterium	s__
ASV278367	k__Bacteria	p__Bacteroidota	c__Bacteroidia	o__Flavobacteriales	f__Weeksellaceae	g__Chryseobacterium	s__
ASV278951	k__Bacteria	p__Actinobacteriota	c__Actinobacteria	o__Propionibacteriales	f__Propionibacteriaceae	g__Cutibacterium	s__
ASV278962	k__Bacteria	p__Proteobacteria	c__Gammaproteobacteria	o__Pseudomonadales	f__Pseudomonadaceae	g__Pseudomonas	s__Pseudomonas sp. FDAARGOS_380
ASV279003	k__Bacteria	p__Proteobacteria	c__Gammaproteobacteria	o__Pseudomonadales	f__Pseudomonadaceae	g__Pseudomonas	s__Pseudomonas versuta
ASV279358	k__Bacteria	p__Firmicutes	c__Bacilli	o__Staphylococcales	f__Staphylococcaceae	g__Staphylococcus	s__Staphylococcus capitis
ASV280073	k__Bacteria	p__Bacteroidota	c__Bacteroidia	o__Flavobacteriales	f__Weeksellaceae	g__Chryseobacterium	s__
ASV281085	k__Bacteria	p__Proteobacteria	c__Gammaproteobacteria	o__Pseudomonadales	f__Pseudomonadaceae	g__Pseudomonas	s__Pseudomonas lurida
ASV281546	k__Bacteria	p__Proteobacteria	c__Gammaproteobacteria	o__Pseudomonadales	f__Moraxellaceae	g__Psychrobacter	s__Psychrobacter alimentarius
ASV282274	k__Bacteria	p__Proteobacteria	c__Gammaproteobacteria	o__Pseudomonadales	f__Pseudomonadaceae	g__Pseudomonas	s__Pseudomonas versuta
ASV282835	k__Bacteria	p__Proteobacteria	c__Gammaproteobacteria	o__Enterobacterales	f__Erwiniaceae	g__Pantoea	s__Pantoea agglomerans
ASV282917	k__Bacteria	p__Proteobacteria	c__Gammaproteobacteria	o__Pseudomonadales	f__Pseudomonadaceae	g__Pseudomonas	s__
ASV283373	k__Bacteria	p__Actinobacteriota	c__Actinobacteria	o__Micrococcales	f__Dermacoccaceae	g__Dermacoccus	s__Dermacoccus nishinomiyaensis
ASV283419	k__Bacteria	p__Bacteroidota	c__Bacteroidia	o__Flavobacteriales	f__Weeksellaceae	g__Chryseobacterium	s__
ASV283979	k__Bacteria	p__Proteobacteria	c__Gammaproteobacteria	o__Enterobacterales	f__Enterobacteriaceae	g__Escherichia-Shigella	s__Escherichia coli
ASV284035	k__Bacteria	p__Proteobacteria	c__Alphaproteobacteria	o__Rhizobiales	f__Xanthobacteraceae	g__Afipia	s__Afipia genosp. 1
ASV285951	k__Bacteria	p__Proteobacteria	c__Alphaproteobacteria	o__Sphingomonadales	f__Sphingomonadaceae	g__Sphingopyxis	s__
ASV286438	k__Bacteria	p__Actinobacteriota	c__Actinobacteria	o__Corynebacteriales	f__Mycobacteriaceae	g__Mycobacterium	s__
ASV286550	k__Bacteria	p__Firmicutes	c__Bacilli	o__Staphylococcales	f__Staphylococcaceae	g__Staphylococcus	s__Staphylococcus capitis
ASV286859	k__Bacteria	p__Bacteroidota	c__Bacteroidia	o__Flavobacteriales	f__Weeksellaceae	g__Chryseobacterium	s__
ASV287331	k__Bacteria	p__Actinobacteriota	c__Actinobacteria	o__Propionibacteriales	f__Propionibacteriaceae	g__Cutibacterium	s__
ASV287496	k__Bacteria	p__Actinobacteriota	c__Actinobacteria	o__Propionibacteriales	f__Propionibacteriaceae	g__Cutibacterium	s__
ASV287747	k__Bacteria	p__Proteobacteria	c__Alphaproteobacteria	o__Rhizobiales	f__Xanthobacteraceae	g__Afipia	s__Afipia genosp. 1
ASV287855	k__Bacteria	p__Proteobacteria	c__Gammaproteobacteria	o__Pseudomonadales	f__Pseudomonadaceae	g__Pseudomonas	s__Pseudomonas sp. LG1D9
ASV288146	k__Bacteria	p__Actinobacteriota	c__Actinobacteria	o__Micrococcales	f__Dermacoccaceae	g__Dermacoccus	s__Dermacoccus nishinomiyaensis
ASV288676	k__Bacteria	p__Proteobacteria	c__Gammaproteobacteria	o__Pseudomonadales	f__Pseudomonadaceae	g__Pseudomonas	s__Pseudomonas sp. FDAARGOS_380
ASV288859	k__Bacteria	p__Proteobacteria	c__Gammaproteobacteria	o__Pseudomonadales	f__Pseudomonadaceae	g__Pseudomonas	s__Pseudomonas versuta
ASV289364	k__Bacteria	p__Actinobacteriota	c__Actinobacteria	o__Propionibacteriales	f__Propionibacteriaceae	g__Cutibacterium	s__
ASV289670	k__Bacteria	p__Bacteroidota	c__Bacteroidia	o__Flavobacteriales	f__Weeksellaceae	g__Chryseobacterium	s__
ASV289855	k__Bacteria	p__Proteobacteria	c__Alphaproteobacteria	o__Rhizobiales	f__Xanthobacteraceae	g__Bradyrhizobium	s__Bradyrhizobium sp. SEMIA 6399
ASV290308	k__Bacteria	p__Actinobacteriota	c__Actinobacteria	o__Propionibacteriales	f__Propionibacteriaceae	g__Cutibacterium	s__
ASV290505	k__Bacteria	p__Proteobacteria	c__Gammaproteobacteria	o__Pseudomonadales	f__Pseudomonadaceae	g__Pseudomonas	s__Pseudomonas versuta
ASV290549	k__Bacteria	p__Actinobacteriota	c__Actinobacteria	o__Propionibacteriales	f__Propionibacteriaceae	g__Cutibacterium	s__
ASV290660	k__Bacteria	p__Proteobacteria	c__Gammaproteobacteria	o__Pseudomonadales	f__Pseudomonadaceae	g__Pseudomonas	s__Pseudomonas lurida
ASV290949	k__Bacteria	p__Firmicutes	c__Bacilli	o__Staphylococcales	f__Staphylococcaceae	g__Staphylococcus	s__Staphylococcus capitis
ASV291373	k__Bacteria	p__Bacteroidota	c__Bacteroidia	o__Flavobacteriales	f__Weeksellaceae	g__Chryseobacterium	s__
ASV291417	k__Bacteria	p__Actinobacteriota	c__Actinobacteria	o__Propionibacteriales	f__Propionibacteriaceae	g__Cutibacterium	s__
ASV291477	k__Bacteria	p__Proteobacteria	c__Gammaproteobacteria	o__Pseudomonadales	f__Pseudomonadaceae	g__Pseudomonas	s__Pseudomonas versuta
ASV291482	k__Bacteria	p__Bacteroidota	c__Bacteroidia	o__Flavobacteriales	f__Weeksellaceae	g__Chryseobacterium	s__
ASV291707	k__Bacteria	p__Proteobacteria	c__Gammaproteobacteria	o__Pseudomonadales	f__Pseudomonadaceae	g__Pseudomonas	s__Pseudomonas sp. FDAARGOS_380
ASV292319	k__Bacteria	p__Proteobacteria	c__Gammaproteobacteria	o__Pseudomonadales	f__Pseudomonadaceae	g__Pseudomonas	s__Pseudomonas sp. FDAARGOS_380
ASV292472	k__Bacteria	p__Bacteroidota	c__Bacteroidia	o__Flavobacteriales	f__Weeksellaceae	g__Chryseobacterium	s__
ASV293016	k__Bacteria	p__Proteobacteria	c__Gammaproteobacteria	o__Pseudomonadales	f__Pseudomonadaceae	g__Pseudomonas	s__
ASV293129	k__Bacteria	p__Proteobacteria	c__Alphaproteobacteria	o__Rhodobacterales	f__Rhodobacteraceae	g__Paracoccus	s__
ASV293433	k__Bacteria	p__Proteobacteria	c__Gammaproteobacteria	o__Pseudomonadales	f__Pseudomonadaceae	g__Pseudomonas	s__Pseudomonas antarctica
ASV293749	k__Bacteria	p__Actinobacteriota	c__Actinobacteria	o__Propionibacteriales	f__Propionibacteriaceae	g__Cutibacterium	s__
ASV294170	k__Bacteria	p__Proteobacteria	c__Alphaproteobacteria	o__Rhizobiales	f__Rhizobiaceae	g__Mesorhizobium	s__Mesorhizobium sp. NBIMC_P2-C1
ASV294173	k__Bacteria	p__Proteobacteria	c__Gammaproteobacteria	o__Pseudomonadales	f__Moraxellaceae	g__Psychrobacter	s__Psychrobacter alimentarius
ASV294188	k__Bacteria	p__Proteobacteria	c__Alphaproteobacteria	o__Sphingomonadales	f__Sphingomonadaceae	g__Sphingopyxis	s__
ASV294631	k__Bacteria	p__Proteobacteria	c__Gammaproteobacteria	o__Pseudomonadales	f__Pseudomonadaceae	g__Pseudomonas	s__Pseudomonas antarctica
ASV295059	k__Bacteria	p__Bacteroidota	c__Bacteroidia	o__Flavobacteriales	f__Weeksellaceae	g__Chryseobacterium	s__
ASV296701	k__Bacteria	p__Actinobacteriota	c__Actinobacteria	o__Propionibacteriales	f__Propionibacteriaceae	g__Cutibacterium	s__
ASV298035	k__Bacteria	p__Proteobacteria	c__Alphaproteobacteria	o__Rhizobiales	f__Xanthobacteraceae	g__Afipia	s__Afipia genosp. 1
ASV298934	k__Bacteria	p__Bacteroidota	c__Bacteroidia	o__Flavobacteriales	f__Weeksellaceae	g__Chryseobacterium	s__
ASV299928	k__Bacteria	p__Bacteroidota	c__Bacteroidia	o__Flavobacteriales	f__Weeksellaceae	g__Chryseobacterium	s__
ASV300275	k__Bacteria	p__Proteobacteria	c__Gammaproteobacteria	o__Pseudomonadales	f__Pseudomonadaceae	g__Pseudomonas	s__Pseudomonas versuta
ASV301575	k__Bacteria	p__Bacteroidota	c__Bacteroidia	o__Flavobacteriales	f__Weeksellaceae	g__Chryseobacterium	s__
ASV301629	k__Bacteria	p__Actinobacteriota	c__Actinobacteria	o__Propionibacteriales	f__Propionibacteriaceae	g__Cutibacterium	s__
ASV301995	k__Bacteria	p__Proteobacteria	c__Gammaproteobacteria	o__Pseudomonadales	f__Pseudomonadaceae	g__Pseudomonas	s__Pseudomonas lurida
ASV302134	k__Bacteria	p__Actinobacteriota	c__Actinobacteria	o__Propionibacteriales	f__Propionibacteriaceae	g__Cutibacterium	s__
ASV302618	k__Bacteria	p__Proteobacteria	c__Alphaproteobacteria	o__Rhizobiales	f__Rhizobiaceae	g__Mesorhizobium	s__Mesorhizobium sp. NBIMC_P2-C1
ASV302857	k__Bacteria	p__Actinobacteriota	c__Actinobacteria	o__Propionibacteriales	f__Propionibacteriaceae	g__Cutibacterium	s__
ASV304638	k__Bacteria	p__Proteobacteria	c__Gammaproteobacteria	o__Pseudomonadales	f__Moraxellaceae	g__Psychrobacter	s__Psychrobacter fozii
ASV304842	k__Bacteria	p__Proteobacteria	c__Alphaproteobacteria	o__Rhizobiales	f__Xanthobacteraceae	g__Afipia	s__Afipia genosp. 1
ASV305998	k__Bacteria	p__Proteobacteria	c__Alphaproteobacteria	o__Rhizobiales	f__Xanthobacteraceae	g__Afipia	s__Afipia genosp. 1
ASV306169	k__Bacteria	p__Proteobacteria	c__Gammaproteobacteria	o__Pseudomonadales	f__Pseudomonadaceae	g__Pseudomonas	s__Pseudomonas fluorescens A506
ASV306526	k__Bacteria	p__Bacteroidota	c__Bacteroidia	o__Flavobacteriales	f__Weeksellaceae	g__Chryseobacterium	s__
ASV307206	k__Bacteria	p__Bacteroidota	c__Bacteroidia	o__Flavobacteriales	f__Weeksellaceae	g__Chryseobacterium	s__
ASV307347	k__Bacteria	p__Proteobacteria	c__Gammaproteobacteria	o__Pseudomonadales	f__Pseudomonadaceae	g__Pseudomonas	s__Pseudomonas versuta
ASV308544	k__Bacteria	p__Proteobacteria	c__Gammaproteobacteria	o__Pseudomonadales	f__Pseudomonadaceae	g__Pseudomonas	s__Pseudomonas sp. FDAARGOS_380
ASV309276	k__Bacteria	p__Proteobacteria	c__Alphaproteobacteria	o__Rhizobiales	f__Beijerinckiaceae	g__Bosea	s__Bosea sp. CRIB-12
ASV309567	k__Bacteria	p__Actinobacteriota	c__Actinobacteria	o__Micrococcales	f__Dermacoccaceae	g__Dermacoccus	s__Dermacoccus nishinomiyaensis
ASV309643	k__Bacteria	p__Proteobacteria	c__Alphaproteobacteria	o__Rhodobacterales	f__Rhodobacteraceae	g__Paracoccus	s__
ASV311174	k__Bacteria	p__Actinobacteriota	c__Actinobacteria	o__Propionibacteriales	f__Propionibacteriaceae	g__Cutibacterium	s__
ASV311704	k__Bacteria	p__Proteobacteria	c__Alphaproteobacteria	o__Rhizobiales	f__Beijerinckiaceae	g__Bosea	s__Bosea sp. CRIB-12
ASV312113	k__Bacteria	p__Actinobacteriota	c__Actinobacteria	o__Propionibacteriales	f__Propionibacteriaceae	g__Cutibacterium	s__
ASV312636	k__Bacteria	p__Bacteroidota	c__Bacteroidia	o__Flavobacteriales	f__Weeksellaceae	g__Chryseobacterium	s__
ASV312747	k__Bacteria	p__Actinobacteriota	c__Actinobacteria	o__Propionibacteriales	f__Propionibacteriaceae	g__Cutibacterium	s__
ASV313294	k__Bacteria	p__Bacteroidota	c__Bacteroidia	o__Flavobacteriales	f__Weeksellaceae	g__Chryseobacterium	s__
ASV313463	k__Bacteria	p__Bacteroidota	c__Bacteroidia	o__Flavobacteriales	f__Weeksellaceae	g__Chryseobacterium	s__
ASV314239	k__Bacteria	p__Actinobacteriota	c__Actinobacteria	o__Propionibacteriales	f__Propionibacteriaceae	g__Cutibacterium	s__
ASV314296	k__Bacteria	p__Actinobacteriota	c__Actinobacteria	o__Micrococcales	f__Micrococcaceae	g__Kocuria	s__Kocuria rhizophila
ASV314783	k__Bacteria	p__Proteobacteria	c__Gammaproteobacteria	o__Pseudomonadales	f__Pseudomonadaceae	g__Pseudomonas	s__Pseudomonas sp. FDAARGOS_380
ASV315228	k__Bacteria	p__Proteobacteria	c__Gammaproteobacteria	o__Pseudomonadales	f__Pseudomonadaceae	g__Pseudomonas	s__Pseudomonas fluorescens
ASV315779	k__Bacteria	p__Proteobacteria	c__Alphaproteobacteria	o__Rhizobiales	f__Rhizobiaceae	g__Ochrobactrum	s__Ochrobactrum anthropi
ASV317201	k__Bacteria	p__Actinobacteriota	c__Actinobacteria	o__Propionibacteriales	f__Propionibacteriaceae	g__Cutibacterium	s__
ASV317264	k__Bacteria	p__Firmicutes	c__Bacilli	o__Lactobacillales	f__Carnobacteriaceae	g__Carnobacterium	s__
ASV318385	k__Bacteria	p__Proteobacteria	c__Gammaproteobacteria	o__Pseudomonadales	f__Pseudomonadaceae	g__Pseudomonas	s__Pseudomonas versuta
ASV318437	k__Bacteria	p__Proteobacteria	c__Gammaproteobacteria	o__Enterobacterales	f__Enterobacteriaceae	g__Escherichia-Shigella	s__Escherichia coli
ASV318638	k__Bacteria	p__Actinobacteriota	c__Actinobacteria	o__Propionibacteriales	f__Propionibacteriaceae	g__Cutibacterium	s__
ASV319308	k__Bacteria	p__Firmicutes	c__Clostridia	o__Clostridiales	f__Clostridiaceae	g__Clostridium sensu stricto 10	s__
ASV320633	k__Bacteria	p__Bacteroidota	c__Bacteroidia	o__Flavobacteriales	f__Weeksellaceae	g__Chryseobacterium	s__
ASV320654	k__Bacteria	p__Proteobacteria	c__Gammaproteobacteria	o__Pseudomonadales	f__Pseudomonadaceae	g__Pseudomonas	s__
ASV321535	k__Bacteria	p__Bacteroidota	c__Bacteroidia	o__Flavobacteriales	f__Weeksellaceae	g__Chryseobacterium	s__
ASV322684	k__Bacteria	p__Firmicutes	c__Bacilli	o__Lactobacillales	f__Carnobacteriaceae	g__Carnobacterium	s__
ASV323636	k__Bacteria	p__Proteobacteria	c__Gammaproteobacteria	o__Pseudomonadales	f__Moraxellaceae	g__Acinetobacter	s__Acinetobacter lwoffii ATCC 9957 = CIP 70.31
ASV324816	k__Bacteria	p__Firmicutes	c__Bacilli	o__Lactobacillales	f__Carnobacteriaceae	g__Carnobacterium	s__
ASV324899	k__Bacteria	p__Proteobacteria	c__Gammaproteobacteria	o__Pseudomonadales	f__Pseudomonadaceae	g__Pseudomonas	s__Pseudomonas sp. FDAARGOS_380
ASV325245	k__Bacteria	p__Actinobacteriota	c__Actinobacteria	o__Propionibacteriales	f__Propionibacteriaceae	g__Cutibacterium	s__
ASV325589	k__Bacteria	p__Actinobacteriota	c__Actinobacteria	o__Corynebacteriales	f__Mycobacteriaceae	g__Mycobacterium	s__
ASV326252	k__Bacteria	p__Proteobacteria	c__Alphaproteobacteria	o__Rhizobiales	f__Xanthobacteraceae	g__Bradyrhizobium	s__Bradyrhizobium sp. SEMIA 6399
ASV326622	k__Bacteria	p__Proteobacteria	c__Gammaproteobacteria	o__Pseudomonadales	f__Pseudomonadaceae	g__Pseudomonas	s__Pseudomonas fluorescens
ASV326948	k__Bacteria	p__Firmicutes	c__Clostridia	o__Clostridiales	f__Clostridiaceae	g__Clostridium sensu stricto 10	s__
ASV327880	k__Bacteria	p__Proteobacteria	c__Gammaproteobacteria	o__Pseudomonadales	f__Pseudomonadaceae	g__Pseudomonas	s__Pseudomonas fluorescens
ASV328322	k__Bacteria	p__Actinobacteriota	c__Actinobacteria	o__Propionibacteriales	f__Propionibacteriaceae	g__Cutibacterium	s__
ASV328344	k__Bacteria	p__Bacteroidota	c__Bacteroidia	o__Flavobacteriales	f__Weeksellaceae	g__Chryseobacterium	s__
ASV329145	k__Bacteria	p__Proteobacteria	c__Gammaproteobacteria	o__Pseudomonadales	f__Pseudomonadaceae	g__Pseudomonas	s__Pseudomonas antarctica
ASV329901	k__Bacteria	p__Actinobacteriota	c__Actinobacteria	o__Propionibacteriales	f__Propionibacteriaceae	g__Cutibacterium	s__
ASV330639	k__Bacteria	p__Proteobacteria	c__Gammaproteobacteria	o__Pseudomonadales	f__Pseudomonadaceae	g__Pseudomonas	s__Pseudomonas sp. FDAARGOS_380
ASV331324	k__Bacteria	p__Proteobacteria	c__Alphaproteobacteria	o__Sphingomonadales	f__Sphingomonadaceae	g__Sphingopyxis	s__
ASV331387	k__Bacteria	p__Actinobacteriota	c__Actinobacteria	o__Propionibacteriales	f__Propionibacteriaceae	g__Cutibacterium	s__
ASV332526	k__Bacteria	p__Proteobacteria	c__Gammaproteobacteria	o__Pseudomonadales	f__Pseudomonadaceae	g__Pseudomonas	s__
ASV332963	k__Bacteria	p__Proteobacteria	c__Gammaproteobacteria	o__Pseudomonadales	f__Pseudomonadaceae	g__Pseudomonas	s__Pseudomonas fluorescens A506
ASV333118	k__Bacteria	p__Proteobacteria	c__Gammaproteobacteria	o__Pseudomonadales	f__Pseudomonadaceae	g__Pseudomonas	s__Pseudomonas antarctica
ASV333323	k__Bacteria	p__Proteobacteria	c__Gammaproteobacteria	o__Pseudomonadales	f__Pseudomonadaceae	g__Pseudomonas	s__Pseudomonas versuta
ASV333349	k__Bacteria	p__Bacteroidota	c__Bacteroidia	o__Flavobacteriales	f__Weeksellaceae	g__Chryseobacterium	s__
ASV333788	k__Bacteria	p__Proteobacteria	c__Gammaproteobacteria	o__Enterobacterales	f__Enterobacteriaceae	g__Escherichia-Shigella	s__Escherichia coli
ASV334586	k__Bacteria	p__Actinobacteriota	c__Actinobacteria	o__Propionibacteriales	f__Propionibacteriaceae	g__Cutibacterium	s__
ASV334743	k__Bacteria	p__Proteobacteria	c__Gammaproteobacteria	o__Pseudomonadales	f__Pseudomonadaceae	g__Pseudomonas	s__Pseudomonas antarctica
ASV334873	k__Bacteria	p__Proteobacteria	c__Gammaproteobacteria	o__Pseudomonadales	f__Pseudomonadaceae	g__Pseudomonas	s__Pseudomonas sp. FDAARGOS_380
ASV335110	k__Bacteria	p__Proteobacteria	c__Gammaproteobacteria	o__Pseudomonadales	f__Pseudomonadaceae	g__Pseudomonas	s__Pseudomonas antarctica
ASV335149	k__Bacteria	p__Bacteroidota	c__Bacteroidia	o__Flavobacteriales	f__Weeksellaceae	g__Chryseobacterium	s__
ASV335537	k__Bacteria	p__Actinobacteriota	c__Actinobacteria	o__Propionibacteriales	f__Propionibacteriaceae	g__Cutibacterium	s__
ASV335962	k__Bacteria	p__Bacteroidota	c__Bacteroidia	o__Flavobacteriales	f__Weeksellaceae	g__Chryseobacterium	s__
ASV336745	k__Bacteria	p__Bacteroidota	c__Bacteroidia	o__Flavobacteriales	f__Weeksellaceae	g__Chryseobacterium	s__
ASV336768	k__Bacteria	p__Bacteroidota	c__Bacteroidia	o__Flavobacteriales	f__Weeksellaceae	g__Chryseobacterium	s__
ASV338590	k__Bacteria	p__Actinobacteriota	c__Actinobacteria	o__Propionibacteriales	f__Propionibacteriaceae	g__Cutibacterium	s__
ASV338594	k__Bacteria	p__Actinobacteriota	c__Actinobacteria	o__Propionibacteriales	f__Propionibacteriaceae	g__Cutibacterium	s__
ASV338643	k__Bacteria	p__Bacteroidota	c__Bacteroidia	o__Flavobacteriales	f__Weeksellaceae	g__Chryseobacterium	s__
ASV339083	k__Bacteria	p__Actinobacteriota	c__Actinobacteria	o__Propionibacteriales	f__Propionibacteriaceae	g__Cutibacterium	s__
ASV340035	k__Bacteria	p__Actinobacteriota	c__Actinobacteria	o__Propionibacteriales	f__Propionibacteriaceae	g__Cutibacterium	s__
ASV340166	k__Bacteria	p__Bacteroidota	c__Bacteroidia	o__Flavobacteriales	f__Weeksellaceae	g__Chryseobacterium	s__
ASV340234	k__Bacteria	p__Actinobacteriota	c__Actinobacteria	o__Propionibacteriales	f__Propionibacteriaceae	g__Cutibacterium	s__
ASV340403	k__Bacteria	p__Proteobacteria	c__Gammaproteobacteria	o__Pseudomonadales	f__Pseudomonadaceae	g__Pseudomonas	s__Pseudomonas sp. MYb193
ASV340610	k__Bacteria	p__Actinobacteriota	c__Actinobacteria	o__Propionibacteriales	f__Propionibacteriaceae	g__Cutibacterium	s__
ASV340662	k__Bacteria	p__Firmicutes	c__Bacilli	o__Lactobacillales	f__Carnobacteriaceae	g__Carnobacterium	s__
ASV340671	k__Bacteria	p__Actinobacteriota	c__Actinobacteria	o__Propionibacteriales	f__Propionibacteriaceae	g__Cutibacterium	s__
ASV341642	k__Bacteria	p__Bacteroidota	c__Bacteroidia	o__Flavobacteriales	f__Weeksellaceae	g__Chryseobacterium	s__
ASV342110	k__Bacteria	p__Proteobacteria	c__Gammaproteobacteria	o__Pseudomonadales	f__Pseudomonadaceae	g__Pseudomonas	s__Pseudomonas antarctica
ASV342726	k__Bacteria	p__Bacteroidota	c__Bacteroidia	o__Flavobacteriales	f__Weeksellaceae	g__Chryseobacterium	s__
ASV342988	k__Bacteria	p__Proteobacteria	c__Gammaproteobacteria	o__Pseudomonadales	f__Pseudomonadaceae	g__Pseudomonas	s__Pseudomonas antarctica
ASV343008	k__Bacteria	p__Proteobacteria	c__Gammaproteobacteria	o__Pseudomonadales	f__Pseudomonadaceae	g__Pseudomonas	s__Pseudomonas versuta
ASV343699	k__Bacteria	p__Actinobacteriota	c__Actinobacteria	o__Propionibacteriales	f__Propionibacteriaceae	g__Cutibacterium	s__
ASV344618	k__Bacteria	p__Actinobacteriota	c__Actinobacteria	o__Propionibacteriales	f__Propionibacteriaceae	g__Cutibacterium	s__
ASV345086	k__Bacteria	p__Bacteroidota	c__Bacteroidia	o__Flavobacteriales	f__Weeksellaceae	g__Chryseobacterium	s__
ASV346231	k__Bacteria	p__Actinobacteriota	c__Actinobacteria	o__Propionibacteriales	f__Propionibacteriaceae	g__Cutibacterium	s__
ASV346360	k__Bacteria	p__Proteobacteria	c__Gammaproteobacteria	o__Enterobacterales	f__Enterobacteriaceae	g__Raoultella	s__Raoultella ornithinolytica
ASV346569	k__Bacteria	p__Proteobacteria	c__Alphaproteobacteria	o__Rhizobiales	f__Xanthobacteraceae	g__Afipia	s__Afipia genosp. 1
ASV347355	k__Bacteria	p__Proteobacteria	c__Gammaproteobacteria	o__Pseudomonadales	f__Pseudomonadaceae	g__Pseudomonas	s__Pseudomonas lurida
ASV347851	k__Bacteria	p__Proteobacteria	c__Gammaproteobacteria	o__Pseudomonadales	f__Moraxellaceae	g__Psychrobacter	s__Psychrobacter alimentarius
ASV348110	k__Bacteria	p__Proteobacteria	c__Gammaproteobacteria	o__Pseudomonadales	f__Pseudomonadaceae	g__Pseudomonas	s__Pseudomonas antarctica
ASV348180	k__Bacteria	p__Firmicutes	c__Bacilli	o__Lactobacillales	f__Carnobacteriaceae	g__Carnobacterium	s__
ASV348699	k__Bacteria	p__Proteobacteria	c__Alphaproteobacteria	o__Rhodobacterales	f__Rhodobacteraceae	g__Paracoccus	s__
ASV348801	k__Bacteria	p__Bacteroidota	c__Bacteroidia	o__Flavobacteriales	f__Weeksellaceae	g__Chryseobacterium	s__
ASV348836	k__Bacteria	p__Proteobacteria	c__Gammaproteobacteria	o__Pseudomonadales	f__Pseudomonadaceae	g__Pseudomonas	s__Pseudomonas versuta
ASV348864	k__Bacteria	p__Proteobacteria	c__Gammaproteobacteria	o__Enterobacterales	f__Enterobacteriaceae	g__Escherichia-Shigella	s__Escherichia albertii
ASV349847	k__Bacteria	p__Proteobacteria	c__Gammaproteobacteria	o__Pseudomonadales	f__Pseudomonadaceae	g__Pseudomonas	s__Pseudomonas antarctica
ASV350669	k__Bacteria	p__Proteobacteria	c__Gammaproteobacteria	o__Pseudomonadales	f__Pseudomonadaceae	g__Pseudomonas	s__Pseudomonas sp. FDAARGOS_380
ASV350692	k__Bacteria	p__Proteobacteria	c__Gammaproteobacteria	o__Enterobacterales	f__Erwiniaceae	g__Pantoea	s__Pantoea agglomerans
ASV351682	k__Bacteria	p__Proteobacteria	c__Gammaproteobacteria	o__Pseudomonadales	f__Pseudomonadaceae	g__Pseudomonas	s__Pseudomonas sp. FDAARGOS_380
ASV351939	k__Bacteria	p__Proteobacteria	c__Alphaproteobacteria	o__Rhizobiales	f__Xanthobacteraceae	g__Bradyrhizobium	s__Bradyrhizobium sp. SEMIA 6399
ASV351968	k__Bacteria	p__Bacteroidota	c__Bacteroidia	o__Flavobacteriales	f__Weeksellaceae	g__Chryseobacterium	s__
ASV352209	k__Bacteria	p__Proteobacteria	c__Gammaproteobacteria	o__Pseudomonadales	f__Pseudomonadaceae	g__Pseudomonas	s__Pseudomonas antarctica
ASV352857	k__Bacteria	p__Proteobacteria	c__Gammaproteobacteria	o__Enterobacterales	f__Enterobacteriaceae	g__Escherichia-Shigella	s__Escherichia albertii
ASV352988	k__Bacteria	p__Proteobacteria	c__Alphaproteobacteria	o__Rhizobiales	f__Xanthobacteraceae	g__Afipia	s__Afipia genosp. 1
ASV353524	k__Bacteria	p__Firmicutes	c__Bacilli	o__Lactobacillales	f__Carnobacteriaceae	g__Carnobacterium	s__
ASV353738	k__Bacteria	p__Proteobacteria	c__Gammaproteobacteria	o__Pseudomonadales	f__Pseudomonadaceae	g__Pseudomonas	s__Pseudomonas antarctica
ASV354902	k__Bacteria	p__Proteobacteria	c__Gammaproteobacteria	o__Pseudomonadales	f__Pseudomonadaceae	g__Pseudomonas	s__Pseudomonas sp. FDAARGOS_380
ASV356425	k__Bacteria	p__Actinobacteriota	c__Actinobacteria	o__Propionibacteriales	f__Propionibacteriaceae	g__Cutibacterium	s__
ASV357137	k__Bacteria	p__Proteobacteria	c__Gammaproteobacteria	o__Pseudomonadales	f__Pseudomonadaceae	g__Pseudomonas	s__Pseudomonas versuta
ASV358706	k__Bacteria	p__Proteobacteria	c__Alphaproteobacteria	o__Rhizobiales	f__Xanthobacteraceae	g__Afipia	s__Afipia genosp. 1
ASV358837	k__Bacteria	p__Actinobacteriota	c__Actinobacteria	o__Propionibacteriales	f__Propionibacteriaceae	g__Cutibacterium	s__
ASV358976	k__Bacteria	p__Proteobacteria	c__Gammaproteobacteria	o__Pseudomonadales	f__Pseudomonadaceae	g__Pseudomonas	s__Pseudomonas versuta
ASV359077	k__Bacteria	p__Bacteroidota	c__Bacteroidia	o__Flavobacteriales	f__Weeksellaceae	g__Chryseobacterium	s__
ASV359373	k__Bacteria	p__Bacteroidota	c__Bacteroidia	o__Flavobacteriales	f__Weeksellaceae	g__Chryseobacterium	s__
ASV359690	k__Bacteria	p__Proteobacteria	c__Gammaproteobacteria	o__Pseudomonadales	f__Moraxellaceae	g__Psychrobacter	s__Psychrobacter alimentarius
ASV359931	k__Bacteria	p__Actinobacteriota	c__Actinobacteria	o__Propionibacteriales	f__Propionibacteriaceae	g__Cutibacterium	s__
ASV361079	k__Bacteria	p__Proteobacteria	c__Gammaproteobacteria	o__Enterobacterales	f__Enterobacteriaceae	g__Escherichia-Shigella	s__Escherichia albertii
ASV361117	k__Bacteria	p__Firmicutes	c__Bacilli	o__Lactobacillales	f__Carnobacteriaceae	g__Carnobacterium	s__
ASV361339	k__Bacteria	p__Bacteroidota	c__Bacteroidia	o__Flavobacteriales	f__Weeksellaceae	g__Chryseobacterium	s__
ASV361800	k__Bacteria	p__Proteobacteria	c__Alphaproteobacteria	o__Rhizobiales	f__Xanthobacteraceae	g__Afipia	s__Afipia genosp. 1
ASV362315	k__Bacteria	p__Actinobacteriota	c__Actinobacteria	o__Propionibacteriales	f__Propionibacteriaceae	g__Cutibacterium	s__
ASV362615	k__Bacteria	p__Actinobacteriota	c__Actinobacteria	o__Propionibacteriales	f__Propionibacteriaceae	g__Cutibacterium	s__
ASV363675	k__Bacteria	p__Proteobacteria	c__Gammaproteobacteria	o__Pseudomonadales	f__Moraxellaceae	g__Psychrobacter	s__Psychrobacter alimentarius
ASV364208	k__Bacteria	p__Bacteroidota	c__Bacteroidia	o__Flavobacteriales	f__Weeksellaceae	g__Chryseobacterium	s__
ASV364614	k__Bacteria	p__Bacteroidota	c__Bacteroidia	o__Flavobacteriales	f__Weeksellaceae	g__Chryseobacterium	s__
ASV364977	k__Bacteria	p__Proteobacteria	c__Gammaproteobacteria	o__Pseudomonadales	f__Pseudomonadaceae	g__Pseudomonas	s__Pseudomonas antarctica
ASV365098	k__Bacteria	p__Proteobacteria	c__Gammaproteobacteria	o__Pseudomonadales	f__Pseudomonadaceae	g__Pseudomonas	s__Pseudomonas versuta
ASV365270	k__Bacteria	p__Proteobacteria	c__Gammaproteobacteria	o__Pseudomonadales	f__Pseudomonadaceae	g__Pseudomonas	s__Pseudomonas antarctica
ASV366210	k__Bacteria	p__Bacteroidota	c__Bacteroidia	o__Flavobacteriales	f__Weeksellaceae	g__Chryseobacterium	s__
ASV366419	k__Bacteria	p__Bacteroidota	c__Bacteroidia	o__Flavobacteriales	f__Weeksellaceae	g__Chryseobacterium	s__
ASV366644	k__Bacteria	p__Actinobacteriota	c__Actinobacteria	o__Micrococcales	f__Dermacoccaceae	g__Dermacoccus	s__Dermacoccus nishinomiyaensis
ASV366714	k__Bacteria	p__Actinobacteriota	c__Actinobacteria	o__Propionibacteriales	f__Propionibacteriaceae	g__Cutibacterium	s__
ASV366774	k__Bacteria	p__Proteobacteria	c__Alphaproteobacteria	o__Rhizobiales	f__Xanthobacteraceae	g__Afipia	s__Afipia genosp. 1
ASV367589	k__Bacteria	p__Proteobacteria	c__Gammaproteobacteria	o__Pseudomonadales	f__Pseudomonadaceae	g__Pseudomonas	s__Pseudomonas sp. FDAARGOS_380
ASV368730	k__Bacteria	p__Firmicutes	c__Bacilli	o__Lactobacillales	f__Carnobacteriaceae	g__Carnobacterium	s__
ASV370492	k__Bacteria	p__Bacteroidota	c__Bacteroidia	o__Flavobacteriales	f__Weeksellaceae	g__Chryseobacterium	s__
ASV370658	k__Bacteria	p__Proteobacteria	c__Alphaproteobacteria	o__Rhizobiales	f__Xanthobacteraceae	g__Afipia	s__Afipia genosp. 1
ASV371104	k__Bacteria	p__Bacteroidota	c__Bacteroidia	o__Flavobacteriales	f__Weeksellaceae	g__Chryseobacterium	s__
ASV372943	k__Bacteria	p__Actinobacteriota	c__Actinobacteria	o__Propionibacteriales	f__Propionibacteriaceae	g__Cutibacterium	s__
ASV373889	k__Bacteria	p__Proteobacteria	c__Gammaproteobacteria	o__Pseudomonadales	f__Pseudomonadaceae	g__Pseudomonas	s__Pseudomonas sp. FDAARGOS_380
ASV373971	k__Bacteria	p__Proteobacteria	c__Gammaproteobacteria	o__Pseudomonadales	f__Pseudomonadaceae	g__Pseudomonas	s__Pseudomonas antarctica
ASV374485	k__Bacteria	p__Bacteroidota	c__Bacteroidia	o__Flavobacteriales	f__Weeksellaceae	g__Chryseobacterium	s__
ASV375382	k__Bacteria	p__Proteobacteria	c__Alphaproteobacteria	o__Rhizobiales	f__Xanthobacteraceae	g__Afipia	s__Afipia genosp. 1
ASV376525	k__Bacteria	p__Actinobacteriota	c__Actinobacteria	o__Propionibacteriales	f__Propionibacteriaceae	g__Cutibacterium	s__
ASV376947	k__Bacteria	p__Actinobacteriota	c__Actinobacteria	o__Propionibacteriales	f__Propionibacteriaceae	g__Cutibacterium	s__
ASV377918	k__Bacteria	p__Bacteroidota	c__Bacteroidia	o__Flavobacteriales	f__Weeksellaceae	g__Chryseobacterium	s__
ASV378248	k__Bacteria	p__Bacteroidota	c__Bacteroidia	o__Flavobacteriales	f__Weeksellaceae	g__Chryseobacterium	s__
ASV378284	k__Bacteria	p__Bacteroidota	c__Bacteroidia	o__Flavobacteriales	f__Weeksellaceae	g__Chryseobacterium	s__
ASV378751	k__Bacteria	p__Actinobacteriota	c__Actinobacteria	o__Propionibacteriales	f__Propionibacteriaceae	g__Cutibacterium	s__
ASV379480	k__Bacteria	p__Proteobacteria	c__Gammaproteobacteria	o__Pseudomonadales	f__Pseudomonadaceae	g__Pseudomonas	s__Pseudomonas sp. NS1(2017)
ASV380032	k__Bacteria	p__Proteobacteria	c__Gammaproteobacteria	o__Enterobacterales	f__Enterobacteriaceae	g__Escherichia-Shigella	s__Escherichia coli
ASV380293	k__Bacteria	p__Bacteroidota	c__Bacteroidia	o__Flavobacteriales	f__Weeksellaceae	g__Chryseobacterium	s__
ASV381399	k__Bacteria	p__Proteobacteria	c__Gammaproteobacteria	o__Pseudomonadales	f__Moraxellaceae	g__Psychrobacter	s__Psychrobacter alimentarius
ASV381684	k__Bacteria	p__Proteobacteria	c__Alphaproteobacteria	o__Rhizobiales	f__Xanthobacteraceae	g__Bradyrhizobium	s__Bradyrhizobium sp. SEMIA 6399
ASV382033	k__Bacteria	p__Bacteroidota	c__Bacteroidia	o__Flavobacteriales	f__Weeksellaceae	g__Chryseobacterium	s__
ASV382074	k__Bacteria	p__Proteobacteria	c__Gammaproteobacteria	o__Enterobacterales	f__Enterobacteriaceae	g__Escherichia-Shigella	s__Escherichia coli
ASV382121	k__Bacteria	p__Actinobacteriota	c__Actinobacteria	o__Propionibacteriales	f__Propionibacteriaceae	g__Cutibacterium	s__
ASV382494	k__Bacteria	p__Actinobacteriota	c__Actinobacteria	o__Micrococcales	f__Dermacoccaceae	g__Dermacoccus	s__Dermacoccus nishinomiyaensis
ASV383644	k__Bacteria	p__Actinobacteriota	c__Actinobacteria	o__Propionibacteriales	f__Propionibacteriaceae	g__Cutibacterium	s__
ASV383786	k__Bacteria	p__Proteobacteria	c__Gammaproteobacteria	o__Pseudomonadales	f__Pseudomonadaceae	g__Pseudomonas	s__Pseudomonas fluorescens A506
ASV383901	k__Bacteria	p__Proteobacteria	c__Gammaproteobacteria	o__Pseudomonadales	f__Pseudomonadaceae	g__Pseudomonas	s__Pseudomonas versuta
ASV384200	k__Bacteria	p__Proteobacteria	c__Alphaproteobacteria	o__Rhizobiales	f__Xanthobacteraceae	g__Afipia	s__Afipia genosp. 1
ASV384905	k__Bacteria	p__Proteobacteria	c__Alphaproteobacteria	o__Rhizobiales	f__Rhizobiaceae	g__Mesorhizobium	s__Mesorhizobium sp. NBIMC_P2-C1
ASV385442	k__Bacteria	p__Bacteroidota	c__Bacteroidia	o__Flavobacteriales	f__Weeksellaceae	g__Chryseobacterium	s__
ASV385908	k__Bacteria	p__Firmicutes	c__Bacilli	o__Lactobacillales	f__Carnobacteriaceae	g__Carnobacterium	s__
ASV386439	k__Bacteria	p__Proteobacteria	c__Gammaproteobacteria	o__Pseudomonadales	f__Pseudomonadaceae	g__Pseudomonas	s__Pseudomonas versuta
ASV387002	k__Bacteria	p__Proteobacteria	c__Gammaproteobacteria	o__Pseudomonadales	f__Pseudomonadaceae	g__Pseudomonas	s__Pseudomonas lurida
ASV387356	k__Bacteria	p__Proteobacteria	c__Gammaproteobacteria	o__Pseudomonadales	f__Pseudomonadaceae	g__Pseudomonas	s__Pseudomonas fluorescens A506
ASV387724	k__Bacteria	p__Proteobacteria	c__Alphaproteobacteria	o__Sphingomonadales	f__Sphingomonadaceae	g__Sphingopyxis	s__
ASV388405	k__Bacteria	p__Actinobacteriota	c__Actinobacteria	o__Propionibacteriales	f__Propionibacteriaceae	g__Cutibacterium	s__
ASV388409	k__Bacteria	p__Proteobacteria	c__Alphaproteobacteria	o__Rhizobiales	f__Xanthobacteraceae	g__Afipia	s__Afipia genosp. 1
ASV388477	k__Bacteria	p__Proteobacteria	c__Alphaproteobacteria	o__Sphingomonadales	f__Sphingomonadaceae	g__Sphingopyxis	s__
ASV389067	k__Bacteria	p__Bacteroidota	c__Bacteroidia	o__Flavobacteriales	f__Weeksellaceae	g__Chryseobacterium	s__
ASV389112	k__Bacteria	p__Actinobacteriota	c__Actinobacteria	o__Propionibacteriales	f__Propionibacteriaceae	g__Cutibacterium	s__
ASV389378	k__Bacteria	p__Proteobacteria	c__Gammaproteobacteria	o__Pseudomonadales	f__Pseudomonadaceae	g__Pseudomonas	s__Pseudomonas versuta
ASV389661	k__Bacteria	p__Proteobacteria	c__Gammaproteobacteria	o__Pseudomonadales	f__Moraxellaceae	g__Acinetobacter	s__Acinetobacter johnsonii XBB1
ASV389704	k__Bacteria	p__Bacteroidota	c__Bacteroidia	o__Flavobacteriales	f__Weeksellaceae	g__Chryseobacterium	s__
ASV390012	k__Bacteria	p__Proteobacteria	c__Gammaproteobacteria	o__Enterobacterales	f__Enterobacteriaceae	g__Escherichia-Shigella	s__Escherichia albertii
ASV390958	k__Bacteria	p__Actinobacteriota	c__Actinobacteria	o__Propionibacteriales	f__Propionibacteriaceae	g__Cutibacterium	s__
ASV391024	k__Bacteria	p__Proteobacteria	c__Gammaproteobacteria	o__Pseudomonadales	f__Moraxellaceae	g__Psychrobacter	s__Psychrobacter alimentarius
ASV392507	k__Bacteria	p__Proteobacteria	c__Gammaproteobacteria	o__Enterobacterales	f__Erwiniaceae	g__Pantoea	s__Pantoea agglomerans
ASV392697	k__Bacteria	p__Actinobacteriota	c__Actinobacteria	o__Propionibacteriales	f__Propionibacteriaceae	g__Cutibacterium	s__
ASV392987	k__Bacteria	p__Proteobacteria	c__Gammaproteobacteria	o__Pseudomonadales	f__Pseudomonadaceae	g__Pseudomonas	s__Pseudomonas versuta
ASV394339	k__Bacteria	p__Proteobacteria	c__Gammaproteobacteria	o__Pseudomonadales	f__Pseudomonadaceae	g__Pseudomonas	s__Pseudomonas sp. FDAARGOS_380
ASV394501	k__Bacteria	p__Proteobacteria	c__Alphaproteobacteria	o__Sphingomonadales	f__Sphingomonadaceae	g__Sphingopyxis	s__
ASV394813	k__Bacteria	p__Proteobacteria	c__Gammaproteobacteria	o__Burkholderiales	f__Burkholderiaceae	g__Ralstonia	s__Ralstonia insidiosa
ASV395184	k__Bacteria	p__Actinobacteriota	c__Actinobacteria	o__Propionibacteriales	f__Propionibacteriaceae	g__Cutibacterium	s__
ASV396414	k__Bacteria	p__Actinobacteriota	c__Actinobacteria	o__Propionibacteriales	f__Propionibacteriaceae	g__Cutibacterium	s__
ASV396501	k__Bacteria	p__Actinobacteriota	c__Actinobacteria	o__Corynebacteriales	f__Mycobacteriaceae	g__Mycobacterium	s__
ASV397128	k__Bacteria	p__Proteobacteria	c__Gammaproteobacteria	o__Pseudomonadales	f__Pseudomonadaceae	g__Pseudomonas	s__Pseudomonas sp. FDAARGOS_380
ASV400243	k__Bacteria	p__Proteobacteria	c__Gammaproteobacteria	o__Pseudomonadales	f__Moraxellaceae	g__Psychrobacter	s__Psychrobacter alimentarius
ASV402354	k__Bacteria	p__Proteobacteria	c__Gammaproteobacteria	o__Pseudomonadales	f__Pseudomonadaceae	g__Pseudomonas	s__Pseudomonas sp. LG1D9
ASV403185	k__Bacteria	p__Bacteroidota	c__Bacteroidia	o__Flavobacteriales	f__Weeksellaceae	g__Chryseobacterium	s__
ASV403851	k__Bacteria	p__Bacteroidota	c__Bacteroidia	o__Flavobacteriales	f__Weeksellaceae	g__Chryseobacterium	s__
ASV403920	k__Bacteria	p__Actinobacteriota	c__Actinobacteria	o__Micrococcales	f__Dermacoccaceae	g__Dermacoccus	s__Dermacoccus nishinomiyaensis
ASV405224	k__Bacteria	p__Actinobacteriota	c__Actinobacteria	o__Propionibacteriales	f__Propionibacteriaceae	g__Cutibacterium	s__
ASV406232	k__Bacteria	p__Proteobacteria	c__Gammaproteobacteria	o__Pseudomonadales	f__Pseudomonadaceae	g__Pseudomonas	s__Pseudomonas sp. FDAARGOS_380
ASV406563	k__Bacteria	p__Proteobacteria	c__Gammaproteobacteria	o__Pseudomonadales	f__Pseudomonadaceae	g__Pseudomonas	s__Pseudomonas versuta
ASV406845	k__Bacteria	p__Proteobacteria	c__Gammaproteobacteria	o__Pseudomonadales	f__Pseudomonadaceae	g__Pseudomonas	s__Pseudomonas versuta
ASV406886	k__Bacteria	p__Proteobacteria	c__Gammaproteobacteria	o__Pseudomonadales	f__Pseudomonadaceae	g__Pseudomonas	s__Pseudomonas versuta
ASV407310	k__Bacteria	p__Proteobacteria	c__Gammaproteobacteria	o__Pseudomonadales	f__Pseudomonadaceae	g__Pseudomonas	s__Pseudomonas sp. FDAARGOS_380
ASV407906	k__Bacteria	p__Actinobacteriota	c__Actinobacteria	o__Propionibacteriales	f__Propionibacteriaceae	g__Cutibacterium	s__
ASV408174	k__Bacteria	p__Proteobacteria	c__Alphaproteobacteria	o__Rhizobiales	f__Xanthobacteraceae	g__Bradyrhizobium	s__Bradyrhizobium sp. ORS 3260
ASV408202	k__Bacteria	p__Proteobacteria	c__Gammaproteobacteria	o__Pseudomonadales	f__Pseudomonadaceae	g__Pseudomonas	s__Pseudomonas versuta
ASV408851	k__Bacteria	p__Proteobacteria	c__Gammaproteobacteria	o__Pseudomonadales	f__Pseudomonadaceae	g__Pseudomonas	s__Pseudomonas fluorescens A506
ASV409513	k__Bacteria	p__Firmicutes	c__Bacilli	o__Lactobacillales	f__Catellicoccaceae	g__Catellicoccus	s__
ASV410042	k__Bacteria	p__Actinobacteriota	c__Actinobacteria	o__Micrococcales	f__Dermacoccaceae	g__Dermacoccus	s__Dermacoccus nishinomiyaensis
ASV410283	k__Bacteria	p__Bacteroidota	c__Bacteroidia	o__Flavobacteriales	f__Weeksellaceae	g__Chryseobacterium	s__
ASV410393	k__Bacteria	p__Bacteroidota	c__Bacteroidia	o__Flavobacteriales	f__Weeksellaceae	g__Chryseobacterium	s__
ASV411655	k__Bacteria	p__Proteobacteria	c__Gammaproteobacteria	o__Pseudomonadales	f__Moraxellaceae	g__Psychrobacter	s__Psychrobacter alimentarius
ASV412432	k__Bacteria	p__Proteobacteria	c__Gammaproteobacteria	o__Pseudomonadales	f__Pseudomonadaceae	g__Pseudomonas	s__Pseudomonas versuta
ASV414415	k__Bacteria	p__Firmicutes	c__Bacilli	o__Lactobacillales	f__Carnobacteriaceae	g__Carnobacterium	s__
ASV415057	k__Bacteria	p__Bacteroidota	c__Bacteroidia	o__Flavobacteriales	f__Weeksellaceae	g__Chryseobacterium	s__
ASV415866	k__Bacteria	p__Proteobacteria	c__Alphaproteobacteria	o__Rhizobiales	f__Beijerinckiaceae	g__Bosea	s__Bosea sp. CRIB-12
ASV416102	k__Bacteria	p__Bacteroidota	c__Bacteroidia	o__Flavobacteriales	f__Weeksellaceae	g__Chryseobacterium	s__
ASV416296	k__Bacteria	p__Bacteroidota	c__Bacteroidia	o__Flavobacteriales	f__Weeksellaceae	g__Chryseobacterium	s__
ASV416379	k__Bacteria	p__Proteobacteria	c__Alphaproteobacteria	o__Rhizobiales	f__Xanthobacteraceae	g__Bradyrhizobium	s__Bradyrhizobium sp. SEMIA 6399
ASV416960	k__Bacteria	p__Proteobacteria	c__Gammaproteobacteria	o__Burkholderiales	f__Burkholderiaceae	g__Ralstonia	s__Ralstonia insidiosa
ASV417825	k__Bacteria	p__Firmicutes	c__Clostridia	o__Clostridiales	f__Clostridiaceae	g__Clostridium sensu stricto 10	s__
ASV417848	k__Bacteria	p__Proteobacteria	c__Gammaproteobacteria	o__Enterobacterales	f__Enterobacteriaceae	g__Escherichia-Shigella	s__Escherichia albertii
ASV417881	k__Bacteria	p__Bacteroidota	c__Bacteroidia	o__Flavobacteriales	f__Weeksellaceae	g__Chryseobacterium	s__
ASV418036	k__Bacteria	p__Proteobacteria	c__Gammaproteobacteria	o__Pseudomonadales	f__Moraxellaceae	g__Psychrobacter	s__Psychrobacter alimentarius
ASV418119	k__Bacteria	p__Bacteroidota	c__Bacteroidia	o__Flavobacteriales	f__Weeksellaceae	g__Chryseobacterium	s__
ASV418246	k__Bacteria	p__Proteobacteria	c__Gammaproteobacteria	o__Pseudomonadales	f__Moraxellaceae	g__Psychrobacter	s__Psychrobacter alimentarius
ASV418601	k__Bacteria	p__Actinobacteriota	c__Actinobacteria	o__Propionibacteriales	f__Propionibacteriaceae	g__Cutibacterium	s__
ASV418700	k__Bacteria	p__Proteobacteria	c__Gammaproteobacteria	o__Pseudomonadales	f__Pseudomonadaceae	g__Pseudomonas	s__Pseudomonas antarctica
ASV418796	k__Bacteria	p__Proteobacteria	c__Alphaproteobacteria	o__Sphingomonadales	f__Sphingomonadaceae	g__Sphingopyxis	s__
ASV419082	k__Bacteria	p__Proteobacteria	c__Gammaproteobacteria	o__Pseudomonadales	f__Pseudomonadaceae	g__Pseudomonas	s__Pseudomonas psychrophila
ASV419712	k__Bacteria	p__Proteobacteria	c__Alphaproteobacteria	o__Rhizobiales	f__Beijerinckiaceae	g__Bosea	s__Bosea sp. CRIB-12
ASV419746	k__Bacteria	p__Actinobacteriota	c__Actinobacteria	o__Propionibacteriales	f__Propionibacteriaceae	g__Cutibacterium	s__
ASV420035	k__Bacteria	p__Actinobacteriota	c__Actinobacteria	o__Micrococcales	f__Dermacoccaceae	g__Dermacoccus	s__Dermacoccus nishinomiyaensis
ASV420446	k__Bacteria	p__Bacteroidota	c__Bacteroidia	o__Flavobacteriales	f__Weeksellaceae	g__Chryseobacterium	s__
ASV421181	k__Bacteria	p__Proteobacteria	c__Gammaproteobacteria	o__Pseudomonadales	f__Pseudomonadaceae	g__Pseudomonas	s__Pseudomonas sp. FDAARGOS_380
ASV421401	k__Bacteria	p__Actinobacteriota	c__Actinobacteria	o__Micrococcales	f__Dermacoccaceae	g__Dermacoccus	s__Dermacoccus nishinomiyaensis
ASV422364	k__Bacteria	p__Bacteroidota	c__Bacteroidia	o__Flavobacteriales	f__Weeksellaceae	g__Chryseobacterium	s__
ASV423375	k__Bacteria	p__Proteobacteria	c__Alphaproteobacteria	o__Sphingomonadales	f__Sphingomonadaceae	g__Sphingopyxis	s__
ASV423491	k__Bacteria	p__Bacteroidota	c__Bacteroidia	o__Flavobacteriales	f__Weeksellaceae	g__Chryseobacterium	s__
ASV424784	k__Bacteria	p__Proteobacteria	c__Gammaproteobacteria	o__Pseudomonadales	f__Pseudomonadaceae	g__Pseudomonas	s__Pseudomonas psychrophila
ASV424863	k__Bacteria	p__Actinobacteriota	c__Actinobacteria	o__Propionibacteriales	f__Propionibacteriaceae	g__Cutibacterium	s__
ASV425144	k__Bacteria	p__Proteobacteria	c__Alphaproteobacteria	o__Rhizobiales	f__Rhizobiaceae	g__Mesorhizobium	s__Mesorhizobium sp. NBIMC_P2-C1
ASV425877	k__Bacteria	p__Proteobacteria	c__Alphaproteobacteria	o__Rhizobiales	f__Xanthobacteraceae	g__Afipia	s__Afipia genosp. 1
ASV426092	k__Bacteria	p__Bacteroidota	c__Bacteroidia	o__Flavobacteriales	f__Weeksellaceae	g__Chryseobacterium	s__
ASV427146	k__Bacteria	p__Proteobacteria	c__Gammaproteobacteria	o__Pseudomonadales	f__Pseudomonadaceae	g__Pseudomonas	s__Pseudomonas sp. S09G 359
ASV427401	k__Bacteria	p__Actinobacteriota	c__Actinobacteria	o__Micrococcales	f__Micrococcaceae	g__Kocuria	s__Kocuria rhizophila
ASV429594	k__Bacteria	p__Proteobacteria	c__Gammaproteobacteria	o__Enterobacterales	f__Enterobacteriaceae	g__Klebsiella	s__Klebsiella michiganensis
ASV430108	k__Bacteria	p__Proteobacteria	c__Alphaproteobacteria	o__Sphingomonadales	f__Sphingomonadaceae	g__Sphingopyxis	s__
ASV430149	k__Bacteria	p__Bacteroidota	c__Bacteroidia	o__Flavobacteriales	f__Weeksellaceae	g__Chryseobacterium	s__
ASV430618	k__Bacteria	p__Proteobacteria	c__Gammaproteobacteria	o__Pseudomonadales	f__Pseudomonadaceae	g__Pseudomonas	s__Pseudomonas antarctica
ASV430765	k__Bacteria	p__Proteobacteria	c__Alphaproteobacteria	o__Rhizobiales	f__Xanthobacteraceae	g__Afipia	s__Afipia genosp. 1
ASV431838	k__Bacteria	p__Bacteroidota	c__Bacteroidia	o__Flavobacteriales	f__Weeksellaceae	g__Chryseobacterium	s__
ASV432152	k__Bacteria	p__Bacteroidota	c__Bacteroidia	o__Flavobacteriales	f__Weeksellaceae	g__Chryseobacterium	s__
ASV432182	k__Bacteria	p__Firmicutes	c__Bacilli	o__Lactobacillales	f__Carnobacteriaceae	g__Carnobacterium	s__
ASV432202	k__Bacteria	p__Actinobacteriota	c__Actinobacteria	o__Corynebacteriales	f__Mycobacteriaceae	g__Mycobacterium	s__
ASV432755	k__Bacteria	p__Proteobacteria	c__Gammaproteobacteria	o__Pseudomonadales	f__Pseudomonadaceae	g__Pseudomonas	s__Pseudomonas antarctica
ASV433444	k__Bacteria	p__Proteobacteria	c__Gammaproteobacteria	o__Pseudomonadales	f__Pseudomonadaceae	g__Pseudomonas	s__Pseudomonas sp. FDAARGOS_380
ASV433901	k__Bacteria	p__Actinobacteriota	c__Actinobacteria	o__Propionibacteriales	f__Propionibacteriaceae	g__Cutibacterium	s__
ASV433913	k__Bacteria	p__Actinobacteriota	c__Actinobacteria	o__Corynebacteriales	f__Mycobacteriaceae	g__Mycobacterium	s__
ASV434607	k__Bacteria	p__Proteobacteria	c__Gammaproteobacteria	o__Pseudomonadales	f__Pseudomonadaceae	g__Pseudomonas	s__Pseudomonas sp. FDAARGOS_380
ASV434619	k__Bacteria	p__Proteobacteria	c__Gammaproteobacteria	o__Pseudomonadales	f__Pseudomonadaceae	g__Pseudomonas	s__Pseudomonas versuta
ASV435266	k__Bacteria	p__Proteobacteria	c__Alphaproteobacteria	o__Sphingomonadales	f__Sphingomonadaceae	g__Sphingopyxis	s__
ASV435308	k__Bacteria	p__Firmicutes	c__Clostridia	o__Clostridiales	f__Clostridiaceae	g__Clostridium sensu stricto 10	s__
ASV436904	k__Bacteria	p__Actinobacteriota	c__Actinobacteria	o__Propionibacteriales	f__Propionibacteriaceae	g__Cutibacterium	s__
ASV436987	k__Bacteria	p__Bacteroidota	c__Bacteroidia	o__Flavobacteriales	f__Weeksellaceae	g__Chryseobacterium	s__
ASV437135	k__Bacteria	p__Actinobacteriota	c__Actinobacteria	o__Propionibacteriales	f__Propionibacteriaceae	g__Cutibacterium	s__
ASV437653	k__Bacteria	p__Proteobacteria	c__Gammaproteobacteria	o__Pseudomonadales	f__Pseudomonadaceae	g__Pseudomonas	s__Pseudomonas sp. FDAARGOS_380
ASV437662	k__Bacteria	p__Actinobacteriota	c__Actinobacteria	o__Propionibacteriales	f__Propionibacteriaceae	g__Cutibacterium	s__
ASV438427	k__Bacteria	p__Bacteroidota	c__Bacteroidia	o__Flavobacteriales	f__Weeksellaceae	g__Chryseobacterium	s__
ASV438870	k__Bacteria	p__Proteobacteria	c__Gammaproteobacteria	o__Pseudomonadales	f__Pseudomonadaceae	g__Pseudomonas	s__Pseudomonas fluorescens
ASV438871	k__Bacteria	p__Proteobacteria	c__Alphaproteobacteria	o__Rhizobiales	f__Xanthobacteraceae	g__Afipia	s__Afipia genosp. 1
ASV438881	k__Bacteria	p__Bacteroidota	c__Bacteroidia	o__Flavobacteriales	f__Weeksellaceae	g__Chryseobacterium	s__
ASV439046	k__Bacteria	p__Bacteroidota	c__Bacteroidia	o__Flavobacteriales	f__Weeksellaceae	g__Chryseobacterium	s__
ASV439409	k__Bacteria	p__Actinobacteriota	c__Actinobacteria	o__Corynebacteriales	f__Corynebacteriaceae	g__Lawsonella	s__
ASV440538	k__Bacteria	p__Actinobacteriota	c__Actinobacteria	o__Propionibacteriales	f__Propionibacteriaceae	g__Cutibacterium	s__
ASV440557	k__Bacteria	p__Bacteroidota	c__Bacteroidia	o__Flavobacteriales	f__Weeksellaceae	g__Chryseobacterium	s__
ASV440606	k__Bacteria	p__Actinobacteriota	c__Actinobacteria	o__Propionibacteriales	f__Propionibacteriaceae	g__Cutibacterium	s__
ASV441441	k__Bacteria	p__Proteobacteria	c__Gammaproteobacteria	o__Pseudomonadales	f__Pseudomonadaceae	g__Pseudomonas	s__Pseudomonas versuta
ASV441480	k__Bacteria	p__Proteobacteria	c__Gammaproteobacteria	o__Pseudomonadales	f__Pseudomonadaceae	g__Pseudomonas	s__Pseudomonas fluorescens
ASV441983	k__Bacteria	p__Bacteroidota	c__Bacteroidia	o__Flavobacteriales	f__Weeksellaceae	g__Chryseobacterium	s__
ASV442507	k__Bacteria	p__Firmicutes	c__Bacilli	o__Lactobacillales	f__Carnobacteriaceae	g__Carnobacterium	s__
ASV442714	k__Bacteria	p__Proteobacteria	c__Alphaproteobacteria	o__Rhizobiales	f__Xanthobacteraceae	g__Afipia	s__Afipia genosp. 1
ASV443932	k__Bacteria	p__Proteobacteria	c__Alphaproteobacteria	o__Sphingomonadales	f__Sphingomonadaceae	g__Sphingopyxis	s__
ASV444368	k__Bacteria	p__Proteobacteria	c__Gammaproteobacteria	o__Pseudomonadales	f__Pseudomonadaceae	g__Pseudomonas	s__Pseudomonas versuta
ASV444755	k__Bacteria	p__Actinobacteriota	c__Actinobacteria	o__Propionibacteriales	f__Propionibacteriaceae	g__Cutibacterium	s__

## Sheet: 5_bacteria_contaminant
The relative abundance of potential bacterial contaminant present in two DNA extraction controls and in bird and bat fecal samples.
ASVs	Host_taxa	N	Mean	SD	SE
k__Bacteria|p__Actinobacteriota|c__Acidimicrobiia|o__Microtrichales|f__Ilumatobacteraceae|g__Ilumatobacter|s__|ASV005122	Black bird	81	4.88073e-05	0.00030908	3.43422e-05
k__Bacteria|p__Actinobacteriota|c__Acidimicrobiia|o__Microtrichales|f__Ilumatobacteraceae|g__Ilumatobacter|s__|ASV005122	Control	2	0.000110791	0.000156682	0.000110791
k__Bacteria|p__Actinobacteriota|c__Acidimicrobiia|o__Microtrichales|f__Ilumatobacteraceae|g__Ilumatobacter|s__|ASV005122	Mallard	107	0	0	0
k__Bacteria|p__Actinobacteriota|c__Acidimicrobiia|o__Microtrichales|f__Ilumatobacteraceae|g__Ilumatobacter|s__|ASV005122	Nathusius bat	87	0	0	0
k__Bacteria|p__Actinobacteriota|c__Acidimicrobiia|o__Microtrichales|f__Ilumatobacteraceae|g__Ilumatobacter|s__|ASV005122	Wood pigeon	74	0	0	0
k__Bacteria|p__Actinobacteriota|c__Actinobacteria|o__Corynebacteriales|f__Corynebacteriaceae|g__Lawsonella|s__|ASV000882	Black bird	81	0.000145871	0.00131284	0.000145871
k__Bacteria|p__Actinobacteriota|c__Actinobacteria|o__Corynebacteriales|f__Corynebacteriaceae|g__Lawsonella|s__|ASV000882	Control	2	0.0133536	0.0188848	0.0133536
k__Bacteria|p__Actinobacteriota|c__Actinobacteria|o__Corynebacteriales|f__Corynebacteriaceae|g__Lawsonella|s__|ASV000882	Mallard	107	4.08726e-06	3.45996e-05	3.34487e-06
k__Bacteria|p__Actinobacteriota|c__Actinobacteria|o__Corynebacteriales|f__Corynebacteriaceae|g__Lawsonella|s__|ASV000882	Nathusius bat	87	0	0	0
k__Bacteria|p__Actinobacteriota|c__Actinobacteria|o__Corynebacteriales|f__Corynebacteriaceae|g__Lawsonella|s__|ASV000882	Wood pigeon	74	0.000582403	0.00377379	0.000438694
k__Bacteria|p__Actinobacteriota|c__Actinobacteria|o__Corynebacteriales|f__Mycobacteriaceae|g__Mycobacterium|s__|ASV002212	Black bird	81	3.43891e-06	3.09502e-05	3.43891e-06
k__Bacteria|p__Actinobacteriota|c__Actinobacteria|o__Corynebacteriales|f__Mycobacteriaceae|g__Mycobacterium|s__|ASV002212	Control	2	0.010082	0.0142581	0.010082
k__Bacteria|p__Actinobacteriota|c__Actinobacteria|o__Corynebacteriales|f__Mycobacteriaceae|g__Mycobacterium|s__|ASV002212	Mallard	107	0	0	0
k__Bacteria|p__Actinobacteriota|c__Actinobacteria|o__Corynebacteriales|f__Mycobacteriaceae|g__Mycobacterium|s__|ASV002212	Nathusius bat	87	0	0	0
k__Bacteria|p__Actinobacteriota|c__Actinobacteria|o__Corynebacteriales|f__Mycobacteriaceae|g__Mycobacterium|s__|ASV002212	Wood pigeon	74	0	0	0
k__Bacteria|p__Actinobacteriota|c__Actinobacteria|o__Micrococcales|f__Dermacoccaceae|g__Dermacoccus|s__Dermacoccus nishinomiyaensis|ASV000164	Black bird	81	0.00199984	0.00685602	0.00076178
k__Bacteria|p__Actinobacteriota|c__Actinobacteria|o__Micrococcales|f__Dermacoccaceae|g__Dermacoccus|s__Dermacoccus nishinomiyaensis|ASV000164	Control	2	0.0249582	0.023075	0.0163165
k__Bacteria|p__Actinobacteriota|c__Actinobacteria|o__Micrococcales|f__Dermacoccaceae|g__Dermacoccus|s__Dermacoccus nishinomiyaensis|ASV000164	Mallard	107	0.000141232	0.001134	0.000109628
k__Bacteria|p__Actinobacteriota|c__Actinobacteria|o__Micrococcales|f__Dermacoccaceae|g__Dermacoccus|s__Dermacoccus nishinomiyaensis|ASV000164	Nathusius bat	87	8.13402e-05	0.000234822	2.51755e-05
k__Bacteria|p__Actinobacteriota|c__Actinobacteria|o__Micrococcales|f__Dermacoccaceae|g__Dermacoccus|s__Dermacoccus nishinomiyaensis|ASV000164	Wood pigeon	74	0.00248473	0.010418	0.00121106
k__Bacteria|p__Actinobacteriota|c__Actinobacteria|o__Micrococcales|f__Dermacoccaceae|g__Dermacoccus|s__Dermacoccus nishinomiyaensis|ASV024522	Black bird	81	1.08859e-06	9.79729e-06	1.08859e-06
k__Bacteria|p__Actinobacteriota|c__Actinobacteria|o__Micrococcales|f__Dermacoccaceae|g__Dermacoccus|s__Dermacoccus nishinomiyaensis|ASV024522	Control	2	0.000151745	0.0002146	0.000151745
k__Bacteria|p__Actinobacteriota|c__Actinobacteria|o__Micrococcales|f__Dermacoccaceae|g__Dermacoccus|s__Dermacoccus nishinomiyaensis|ASV024522	Mallard	107	0	0	0
k__Bacteria|p__Actinobacteriota|c__Actinobacteria|o__Micrococcales|f__Dermacoccaceae|g__Dermacoccus|s__Dermacoccus nishinomiyaensis|ASV024522	Nathusius bat	87	0	0	0
k__Bacteria|p__Actinobacteriota|c__Actinobacteria|o__Micrococcales|f__Dermacoccaceae|g__Dermacoccus|s__Dermacoccus nishinomiyaensis|ASV024522	Wood pigeon	74	0	0	0
k__Bacteria|p__Actinobacteriota|c__Actinobacteria|o__Micrococcales|f__Micrococcaceae|g__Kocuria|s__Kocuria rhizophila|ASV000885	Black bird	81	0.000567009	0.00390409	0.000433788
k__Bacteria|p__Actinobacteriota|c__Actinobacteria|o__Micrococcales|f__Micrococcaceae|g__Kocuria|s__Kocuria rhizophila|ASV000885	Control	2	0.00713202	0.0100862	0.00713202
k__Bacteria|p__Actinobacteriota|c__Actinobacteria|o__Micrococcales|f__Micrococcaceae|g__Kocuria|s__Kocuria rhizophila|ASV000885	Mallard	107	0	0	0
k__Bacteria|p__Actinobacteriota|c__Actinobacteria|o__Micrococcales|f__Micrococcaceae|g__Kocuria|s__Kocuria rhizophila|ASV000885	Nathusius bat	87	3.60532e-06	2.4433e-05	2.61949e-06
k__Bacteria|p__Actinobacteriota|c__Actinobacteria|o__Micrococcales|f__Micrococcaceae|g__Kocuria|s__Kocuria rhizophila|ASV000885	Wood pigeon	74	0.000100255	0.000502717	5.84397e-05
k__Bacteria|p__Actinobacteriota|c__Actinobacteria|o__Propionibacteriales|f__Propionibacteriaceae|g__Cutibacterium|s__|ASV000040	Black bird	81	0.00592001	0.019189	0.00213211
k__Bacteria|p__Actinobacteriota|c__Actinobacteria|o__Propionibacteriales|f__Propionibacteriaceae|g__Cutibacterium|s__|ASV000040	Control	2	0.167982	0.237562	0.167982
k__Bacteria|p__Actinobacteriota|c__Actinobacteria|o__Propionibacteriales|f__Propionibacteriaceae|g__Cutibacterium|s__|ASV000040	Mallard	107	0.00030188	0.00124563	0.00012042
k__Bacteria|p__Actinobacteriota|c__Actinobacteria|o__Propionibacteriales|f__Propionibacteriaceae|g__Cutibacterium|s__|ASV000040	Nathusius bat	87	4.42933e-05	0.000139314	1.49361e-05
k__Bacteria|p__Actinobacteriota|c__Actinobacteria|o__Propionibacteriales|f__Propionibacteriaceae|g__Cutibacterium|s__|ASV000040	Wood pigeon	74	0.0071039	0.028382	0.00329934
k__Bacteria|p__Actinobacteriota|c__Actinobacteria|o__Propionibacteriales|f__Propionibacteriaceae|g__Cutibacterium|s__|ASV000045	Black bird	81	0.0094165	0.0456785	0.00507539
k__Bacteria|p__Actinobacteriota|c__Actinobacteria|o__Propionibacteriales|f__Propionibacteriaceae|g__Cutibacterium|s__|ASV000045	Control	2	0.0312431	0.0441844	0.0312431
k__Bacteria|p__Actinobacteriota|c__Actinobacteria|o__Propionibacteriales|f__Propionibacteriaceae|g__Cutibacterium|s__|ASV000045	Mallard	107	7.18318e-05	0.000468904	4.53307e-05
k__Bacteria|p__Actinobacteriota|c__Actinobacteria|o__Propionibacteriales|f__Propionibacteriaceae|g__Cutibacterium|s__|ASV000045	Nathusius bat	87	6.10068e-05	0.00023008	2.46672e-05
k__Bacteria|p__Actinobacteriota|c__Actinobacteria|o__Propionibacteriales|f__Propionibacteriaceae|g__Cutibacterium|s__|ASV000045	Wood pigeon	74	0.000328572	0.00225225	0.000261819
k__Bacteria|p__Actinobacteriota|c__Actinobacteria|o__Propionibacteriales|f__Propionibacteriaceae|g__Cutibacterium|s__|ASV000616	Black bird	81	0	0	0
k__Bacteria|p__Actinobacteriota|c__Actinobacteria|o__Propionibacteriales|f__Propionibacteriaceae|g__Cutibacterium|s__|ASV000616	Control	2	0.00652504	0.0092278	0.00652504
k__Bacteria|p__Actinobacteriota|c__Actinobacteria|o__Propionibacteriales|f__Propionibacteriaceae|g__Cutibacterium|s__|ASV000616	Mallard	107	0	0	0
k__Bacteria|p__Actinobacteriota|c__Actinobacteria|o__Propionibacteriales|f__Propionibacteriaceae|g__Cutibacterium|s__|ASV000616	Nathusius bat	87	0	0	0
k__Bacteria|p__Actinobacteriota|c__Actinobacteria|o__Propionibacteriales|f__Propionibacteriaceae|g__Cutibacterium|s__|ASV000616	Wood pigeon	74	0.000750932	0.00380177	0.000441947
k__Bacteria|p__Actinobacteriota|c__Actinobacteria|o__Propionibacteriales|f__Propionibacteriaceae|g__Cutibacterium|s__|ASV019949	Black bird	81	1.83032e-06	1.15752e-05	1.28613e-06
k__Bacteria|p__Actinobacteriota|c__Actinobacteria|o__Propionibacteriales|f__Propionibacteriaceae|g__Cutibacterium|s__|ASV019949	Control	2	0.000151745	0.0002146	0.000151745
k__Bacteria|p__Actinobacteriota|c__Actinobacteria|o__Propionibacteriales|f__Propionibacteriaceae|g__Cutibacterium|s__|ASV019949	Mallard	107	0	0	0
k__Bacteria|p__Actinobacteriota|c__Actinobacteria|o__Propionibacteriales|f__Propionibacteriaceae|g__Cutibacterium|s__|ASV019949	Nathusius bat	87	0	0	0
k__Bacteria|p__Actinobacteriota|c__Actinobacteria|o__Propionibacteriales|f__Propionibacteriaceae|g__Cutibacterium|s__|ASV019949	Wood pigeon	74	0	0	0
k__Bacteria|p__Actinobacteriota|c__Actinobacteria|o__Propionibacteriales|f__Propionibacteriaceae|g__Cutibacterium|s__|ASV023133	Black bird	81	0	0	0
k__Bacteria|p__Actinobacteriota|c__Actinobacteria|o__Propionibacteriales|f__Propionibacteriaceae|g__Cutibacterium|s__|ASV023133	Control	2	0.000151745	0.0002146	0.000151745
k__Bacteria|p__Actinobacteriota|c__Actinobacteria|o__Propionibacteriales|f__Propionibacteriaceae|g__Cutibacterium|s__|ASV023133	Mallard	107	6.49013e-07	6.71345e-06	6.49013e-07
k__Bacteria|p__Actinobacteriota|c__Actinobacteria|o__Propionibacteriales|f__Propionibacteriaceae|g__Cutibacterium|s__|ASV023133	Nathusius bat	87	0	0	0
k__Bacteria|p__Actinobacteriota|c__Actinobacteria|o__Propionibacteriales|f__Propionibacteriaceae|g__Cutibacterium|s__|ASV023133	Wood pigeon	74	0	0	0
k__Bacteria|p__Actinobacteriota|c__Actinobacteria|o__Propionibacteriales|f__Propionibacteriaceae|g__Cutibacterium|s__|ASV026543	Black bird	81	1.08859e-06	9.79729e-06	1.08859e-06
k__Bacteria|p__Actinobacteriota|c__Actinobacteria|o__Propionibacteriales|f__Propionibacteriaceae|g__Cutibacterium|s__|ASV026543	Control	2	0.000151745	0.0002146	0.000151745
k__Bacteria|p__Actinobacteriota|c__Actinobacteria|o__Propionibacteriales|f__Propionibacteriaceae|g__Cutibacterium|s__|ASV026543	Mallard	107	0	0	0
k__Bacteria|p__Actinobacteriota|c__Actinobacteria|o__Propionibacteriales|f__Propionibacteriaceae|g__Cutibacterium|s__|ASV026543	Nathusius bat	87	0	0	0
k__Bacteria|p__Actinobacteriota|c__Actinobacteria|o__Propionibacteriales|f__Propionibacteriaceae|g__Cutibacterium|s__|ASV026543	Wood pigeon	74	0	0	0
k__Bacteria|p__Bacteroidota|c__Bacteroidia|o__Flavobacteriales|f__Weeksellaceae|g__Chryseobacterium|s__|ASV000041	Black bird	81	0.0127759	0.0418989	0.00465544
k__Bacteria|p__Bacteroidota|c__Bacteroidia|o__Flavobacteriales|f__Weeksellaceae|g__Chryseobacterium|s__|ASV000041	Control	2	0.0846444	0.119705	0.0846444
k__Bacteria|p__Bacteroidota|c__Bacteroidia|o__Flavobacteriales|f__Weeksellaceae|g__Chryseobacterium|s__|ASV000041	Mallard	107	0	0	0
k__Bacteria|p__Bacteroidota|c__Bacteroidia|o__Flavobacteriales|f__Weeksellaceae|g__Chryseobacterium|s__|ASV000041	Nathusius bat	87	0	0	0
k__Bacteria|p__Bacteroidota|c__Bacteroidia|o__Flavobacteriales|f__Weeksellaceae|g__Chryseobacterium|s__|ASV000041	Wood pigeon	74	0	0	0
k__Bacteria|p__Bacteroidota|c__Bacteroidia|o__Flavobacteriales|f__Weeksellaceae|g__Chryseobacterium|s__|ASV000170	Black bird	81	0.00426514	0.0114047	0.00126719
k__Bacteria|p__Bacteroidota|c__Bacteroidia|o__Flavobacteriales|f__Weeksellaceae|g__Chryseobacterium|s__|ASV000170	Control	2	0.0268114	0.0379171	0.0268114
k__Bacteria|p__Bacteroidota|c__Bacteroidia|o__Flavobacteriales|f__Weeksellaceae|g__Chryseobacterium|s__|ASV000170	Mallard	107	0	0	0
k__Bacteria|p__Bacteroidota|c__Bacteroidia|o__Flavobacteriales|f__Weeksellaceae|g__Chryseobacterium|s__|ASV000170	Nathusius bat	87	0	0	0
k__Bacteria|p__Bacteroidota|c__Bacteroidia|o__Flavobacteriales|f__Weeksellaceae|g__Chryseobacterium|s__|ASV000170	Wood pigeon	74	0	0	0
k__Bacteria|p__Bacteroidota|c__Bacteroidia|o__Flavobacteriales|f__Weeksellaceae|g__Chryseobacterium|s__|ASV000771	Black bird	81	0.000638364	0.00198821	0.000220912
k__Bacteria|p__Bacteroidota|c__Bacteroidia|o__Flavobacteriales|f__Weeksellaceae|g__Chryseobacterium|s__|ASV000771	Control	2	0.00299136	0.00423042	0.00299136
k__Bacteria|p__Bacteroidota|c__Bacteroidia|o__Flavobacteriales|f__Weeksellaceae|g__Chryseobacterium|s__|ASV000771	Mallard	107	0	0	0
k__Bacteria|p__Bacteroidota|c__Bacteroidia|o__Flavobacteriales|f__Weeksellaceae|g__Chryseobacterium|s__|ASV000771	Nathusius bat	87	0	0	0
k__Bacteria|p__Bacteroidota|c__Bacteroidia|o__Flavobacteriales|f__Weeksellaceae|g__Chryseobacterium|s__|ASV000771	Wood pigeon	74	0	0	0
k__Bacteria|p__Bacteroidota|c__Bacteroidia|o__Flavobacteriales|f__Weeksellaceae|g__Chryseobacterium|s__|ASV001945	Black bird	81	0.000127688	0.000688364	7.64849e-05
k__Bacteria|p__Bacteroidota|c__Bacteroidia|o__Flavobacteriales|f__Weeksellaceae|g__Chryseobacterium|s__|ASV001945	Control	2	0.00819854	0.0115945	0.00819854
k__Bacteria|p__Bacteroidota|c__Bacteroidia|o__Flavobacteriales|f__Weeksellaceae|g__Chryseobacterium|s__|ASV001945	Mallard	107	0	0	0
k__Bacteria|p__Bacteroidota|c__Bacteroidia|o__Flavobacteriales|f__Weeksellaceae|g__Chryseobacterium|s__|ASV001945	Nathusius bat	87	0	0	0
k__Bacteria|p__Bacteroidota|c__Bacteroidia|o__Flavobacteriales|f__Weeksellaceae|g__Chryseobacterium|s__|ASV001945	Wood pigeon	74	0	0	0
k__Bacteria|p__Bacteroidota|c__Bacteroidia|o__Flavobacteriales|f__Weeksellaceae|g__Chryseobacterium|s__|ASV004884	Black bird	81	3.39701e-05	0.000129892	1.44324e-05
k__Bacteria|p__Bacteroidota|c__Bacteroidia|o__Flavobacteriales|f__Weeksellaceae|g__Chryseobacterium|s__|ASV004884	Control	2	0.000553955	0.000783411	0.000553955
k__Bacteria|p__Bacteroidota|c__Bacteroidia|o__Flavobacteriales|f__Weeksellaceae|g__Chryseobacterium|s__|ASV004884	Mallard	107	0	0	0
k__Bacteria|p__Bacteroidota|c__Bacteroidia|o__Flavobacteriales|f__Weeksellaceae|g__Chryseobacterium|s__|ASV004884	Nathusius bat	87	0	0	0
k__Bacteria|p__Bacteroidota|c__Bacteroidia|o__Flavobacteriales|f__Weeksellaceae|g__Chryseobacterium|s__|ASV004884	Wood pigeon	74	0	0	0
k__Bacteria|p__Bacteroidota|c__Bacteroidia|o__Flavobacteriales|f__Weeksellaceae|g__Chryseobacterium|s__|ASV005536	Black bird	81	2.30837e-05	0.000146107	1.62341e-05
k__Bacteria|p__Bacteroidota|c__Bacteroidia|o__Flavobacteriales|f__Weeksellaceae|g__Chryseobacterium|s__|ASV005536	Control	2	0.000775537	0.00109678	0.000775537
k__Bacteria|p__Bacteroidota|c__Bacteroidia|o__Flavobacteriales|f__Weeksellaceae|g__Chryseobacterium|s__|ASV005536	Mallard	107	0	0	0
k__Bacteria|p__Bacteroidota|c__Bacteroidia|o__Flavobacteriales|f__Weeksellaceae|g__Chryseobacterium|s__|ASV005536	Nathusius bat	87	0	0	0
k__Bacteria|p__Bacteroidota|c__Bacteroidia|o__Flavobacteriales|f__Weeksellaceae|g__Chryseobacterium|s__|ASV005536	Wood pigeon	74	0	0	0
k__Bacteria|p__Bacteroidota|c__Bacteroidia|o__Flavobacteriales|f__Weeksellaceae|g__Chryseobacterium|s__|ASV008323	Black bird	81	1.32868e-05	0.000119581	1.32868e-05
k__Bacteria|p__Bacteroidota|c__Bacteroidia|o__Flavobacteriales|f__Weeksellaceae|g__Chryseobacterium|s__|ASV008323	Control	2	0.000110791	0.000156682	0.000110791
k__Bacteria|p__Bacteroidota|c__Bacteroidia|o__Flavobacteriales|f__Weeksellaceae|g__Chryseobacterium|s__|ASV008323	Mallard	107	0	0	0
k__Bacteria|p__Bacteroidota|c__Bacteroidia|o__Flavobacteriales|f__Weeksellaceae|g__Chryseobacterium|s__|ASV008323	Nathusius bat	87	0	0	0
k__Bacteria|p__Bacteroidota|c__Bacteroidia|o__Flavobacteriales|f__Weeksellaceae|g__Chryseobacterium|s__|ASV008323	Wood pigeon	74	0	0	0
k__Bacteria|p__Bacteroidota|c__Bacteroidia|o__Flavobacteriales|f__Weeksellaceae|g__Chryseobacterium|s__|ASV021125	Black bird	81	9.68538e-06	6.14241e-05	6.8249e-06
k__Bacteria|p__Bacteroidota|c__Bacteroidia|o__Flavobacteriales|f__Weeksellaceae|g__Chryseobacterium|s__|ASV021125	Control	2	0.000110791	0.000156682	0.000110791
k__Bacteria|p__Bacteroidota|c__Bacteroidia|o__Flavobacteriales|f__Weeksellaceae|g__Chryseobacterium|s__|ASV021125	Mallard	107	0	0	0
k__Bacteria|p__Bacteroidota|c__Bacteroidia|o__Flavobacteriales|f__Weeksellaceae|g__Chryseobacterium|s__|ASV021125	Nathusius bat	87	0	0	0
k__Bacteria|p__Bacteroidota|c__Bacteroidia|o__Flavobacteriales|f__Weeksellaceae|g__Chryseobacterium|s__|ASV021125	Wood pigeon	74	0	0	0
k__Bacteria|p__Bacteroidota|c__Bacteroidia|o__Flavobacteriales|f__Weeksellaceae|g__Chryseobacterium|s__|ASV026755	Black bird	81	1.10724e-06	9.96512e-06	1.10724e-06
k__Bacteria|p__Bacteroidota|c__Bacteroidia|o__Flavobacteriales|f__Weeksellaceae|g__Chryseobacterium|s__|ASV026755	Control	2	0.000110791	0.000156682	0.000110791
k__Bacteria|p__Bacteroidota|c__Bacteroidia|o__Flavobacteriales|f__Weeksellaceae|g__Chryseobacterium|s__|ASV026755	Mallard	107	0	0	0
k__Bacteria|p__Bacteroidota|c__Bacteroidia|o__Flavobacteriales|f__Weeksellaceae|g__Chryseobacterium|s__|ASV026755	Nathusius bat	87	0	0	0
k__Bacteria|p__Bacteroidota|c__Bacteroidia|o__Flavobacteriales|f__Weeksellaceae|g__Chryseobacterium|s__|ASV026755	Wood pigeon	74	0	0	0
k__Bacteria|p__Firmicutes|c__Bacilli|o__Lactobacillales|f__Carnobacteriaceae|g__Carnobacterium|s__|ASV000348	Black bird	81	0.000473816	0.00188811	0.00020979
k__Bacteria|p__Firmicutes|c__Bacilli|o__Lactobacillales|f__Carnobacteriaceae|g__Carnobacterium|s__|ASV000348	Control	2	0.0220474	0.0311798	0.0220474
k__Bacteria|p__Firmicutes|c__Bacilli|o__Lactobacillales|f__Carnobacteriaceae|g__Carnobacterium|s__|ASV000348	Mallard	107	0	0	0
k__Bacteria|p__Firmicutes|c__Bacilli|o__Lactobacillales|f__Carnobacteriaceae|g__Carnobacterium|s__|ASV000348	Nathusius bat	87	0.000856189	0.00463432	0.000496851
k__Bacteria|p__Firmicutes|c__Bacilli|o__Lactobacillales|f__Carnobacteriaceae|g__Carnobacterium|s__|ASV000348	Wood pigeon	74	3.19955e-05	0.000275235	3.19955e-05
k__Bacteria|p__Firmicutes|c__Bacilli|o__Lactobacillales|f__Carnobacteriaceae|g__Carnobacterium|s__|ASV000457	Black bird	81	2.03137e-06	1.82824e-05	2.03137e-06
k__Bacteria|p__Firmicutes|c__Bacilli|o__Lactobacillales|f__Carnobacteriaceae|g__Carnobacterium|s__|ASV000457	Control	2	0.00454243	0.00642397	0.00454243
k__Bacteria|p__Firmicutes|c__Bacilli|o__Lactobacillales|f__Carnobacteriaceae|g__Carnobacterium|s__|ASV000457	Mallard	107	3.84047e-06	3.97262e-05	3.84047e-06
k__Bacteria|p__Firmicutes|c__Bacilli|o__Lactobacillales|f__Carnobacteriaceae|g__Carnobacterium|s__|ASV000457	Nathusius bat	87	0.000726523	0.00379346	0.000406702
k__Bacteria|p__Firmicutes|c__Bacilli|o__Lactobacillales|f__Carnobacteriaceae|g__Carnobacterium|s__|ASV000457	Wood pigeon	74	0	0	0
k__Bacteria|p__Firmicutes|c__Bacilli|o__Lactobacillales|f__Catellicoccaceae|g__Catellicoccus|s__|ASV001763	Black bird	81	0.000289421	0.00217752	0.000241947
k__Bacteria|p__Firmicutes|c__Bacilli|o__Lactobacillales|f__Catellicoccaceae|g__Catellicoccus|s__|ASV001763	Control	2	0.000151745	0.0002146	0.000151745
k__Bacteria|p__Firmicutes|c__Bacilli|o__Lactobacillales|f__Catellicoccaceae|g__Catellicoccus|s__|ASV001763	Mallard	107	0	0	0
k__Bacteria|p__Firmicutes|c__Bacilli|o__Lactobacillales|f__Catellicoccaceae|g__Catellicoccus|s__|ASV001763	Nathusius bat	87	0	0	0
k__Bacteria|p__Firmicutes|c__Bacilli|o__Lactobacillales|f__Catellicoccaceae|g__Catellicoccus|s__|ASV001763	Wood pigeon	74	0	0	0
k__Bacteria|p__Firmicutes|c__Bacilli|o__Staphylococcales|f__Staphylococcaceae|g__Staphylococcus|s__Staphylococcus capitis|ASV001260	Black bird	81	0	0	0
k__Bacteria|p__Firmicutes|c__Bacilli|o__Staphylococcales|f__Staphylococcaceae|g__Staphylococcus|s__Staphylococcus capitis|ASV001260	Control	2	0.007739	0.0109446	0.007739
k__Bacteria|p__Firmicutes|c__Bacilli|o__Staphylococcales|f__Staphylococcaceae|g__Staphylococcus|s__Staphylococcus capitis|ASV001260	Mallard	107	1.55136e-05	0.000129371	1.25068e-05
k__Bacteria|p__Firmicutes|c__Bacilli|o__Staphylococcales|f__Staphylococcaceae|g__Staphylococcus|s__Staphylococcus capitis|ASV001260	Nathusius bat	87	0	0	0
k__Bacteria|p__Firmicutes|c__Bacilli|o__Staphylococcales|f__Staphylococcaceae|g__Staphylococcus|s__Staphylococcus capitis|ASV001260	Wood pigeon	74	0.00107117	0.0086098	0.00100087
k__Bacteria|p__Firmicutes|c__Bacilli|o__Staphylococcales|f__Staphylococcaceae|g__Staphylococcus|s__Staphylococcus capitis|ASV001821	Black bird	81	0.000119111	0.00101871	0.00011319
k__Bacteria|p__Firmicutes|c__Bacilli|o__Staphylococcales|f__Staphylococcaceae|g__Staphylococcus|s__Staphylococcus capitis|ASV001821	Control	2	0.00758725	0.01073	0.00758725
k__Bacteria|p__Firmicutes|c__Bacilli|o__Staphylococcales|f__Staphylococcaceae|g__Staphylococcus|s__Staphylococcus capitis|ASV001821	Mallard	107	0	0	0
k__Bacteria|p__Firmicutes|c__Bacilli|o__Staphylococcales|f__Staphylococcaceae|g__Staphylococcus|s__Staphylococcus capitis|ASV001821	Nathusius bat	87	0	0	0
k__Bacteria|p__Firmicutes|c__Bacilli|o__Staphylococcales|f__Staphylococcaceae|g__Staphylococcus|s__Staphylococcus capitis|ASV001821	Wood pigeon	74	2.24981e-06	1.93536e-05	2.24981e-06
k__Bacteria|p__Proteobacteria|c__Alphaproteobacteria|o__Rhizobiales|f__Rhizobiaceae|g__Mesorhizobium|s__Mesorhizobium sp. NBIMC_P2-C1|ASV002551	Black bird	81	3.05243e-05	0.000274718	3.05243e-05
k__Bacteria|p__Proteobacteria|c__Alphaproteobacteria|o__Rhizobiales|f__Rhizobiaceae|g__Mesorhizobium|s__Mesorhizobium sp. NBIMC_P2-C1|ASV002551	Control	2	0.0060698	0.008584	0.0060698
k__Bacteria|p__Proteobacteria|c__Alphaproteobacteria|o__Rhizobiales|f__Rhizobiaceae|g__Mesorhizobium|s__Mesorhizobium sp. NBIMC_P2-C1|ASV002551	Mallard	107	1.04708e-05	8.98369e-05	8.68486e-06
k__Bacteria|p__Proteobacteria|c__Alphaproteobacteria|o__Rhizobiales|f__Rhizobiaceae|g__Mesorhizobium|s__Mesorhizobium sp. NBIMC_P2-C1|ASV002551	Nathusius bat	87	0	0	0
k__Bacteria|p__Proteobacteria|c__Alphaproteobacteria|o__Rhizobiales|f__Rhizobiaceae|g__Mesorhizobium|s__Mesorhizobium sp. NBIMC_P2-C1|ASV002551	Wood pigeon	74	2.7246e-05	0.000157648	1.83262e-05
k__Bacteria|p__Proteobacteria|c__Alphaproteobacteria|o__Rhizobiales|f__Rhizobiaceae|g__Ochrobactrum|s__Ochrobactrum anthropi|ASV000126	Black bird	81	0.00366109	0.0109557	0.0012173
k__Bacteria|p__Proteobacteria|c__Alphaproteobacteria|o__Rhizobiales|f__Rhizobiaceae|g__Ochrobactrum|s__Ochrobactrum anthropi|ASV000126	Control	2	0.00166187	0.00235023	0.00166187
k__Bacteria|p__Proteobacteria|c__Alphaproteobacteria|o__Rhizobiales|f__Rhizobiaceae|g__Ochrobactrum|s__Ochrobactrum anthropi|ASV000126	Mallard	107	0	0	0
k__Bacteria|p__Proteobacteria|c__Alphaproteobacteria|o__Rhizobiales|f__Rhizobiaceae|g__Ochrobactrum|s__Ochrobactrum anthropi|ASV000126	Nathusius bat	87	0	0	0
k__Bacteria|p__Proteobacteria|c__Alphaproteobacteria|o__Rhizobiales|f__Rhizobiaceae|g__Ochrobactrum|s__Ochrobactrum anthropi|ASV000126	Wood pigeon	74	0.00231416	0.00559772	0.000650722
k__Bacteria|p__Proteobacteria|c__Alphaproteobacteria|o__Rhizobiales|f__Xanthobacteraceae|g__Afipia|s__Afipia genosp. 1|ASV000152	Black bird	81	0.000988608	0.00590344	0.000655938
k__Bacteria|p__Proteobacteria|c__Alphaproteobacteria|o__Rhizobiales|f__Xanthobacteraceae|g__Afipia|s__Afipia genosp. 1|ASV000152	Control	2	0.0949924	0.13434	0.0949924
k__Bacteria|p__Proteobacteria|c__Alphaproteobacteria|o__Rhizobiales|f__Xanthobacteraceae|g__Afipia|s__Afipia genosp. 1|ASV000152	Mallard	107	0.000137259	0.000474829	4.59034e-05
k__Bacteria|p__Proteobacteria|c__Alphaproteobacteria|o__Rhizobiales|f__Xanthobacteraceae|g__Afipia|s__Afipia genosp. 1|ASV000152	Nathusius bat	87	4.14482e-05	0.000132313	1.41854e-05
k__Bacteria|p__Proteobacteria|c__Alphaproteobacteria|o__Rhizobiales|f__Xanthobacteraceae|g__Afipia|s__Afipia genosp. 1|ASV000152	Wood pigeon	74	0.00235315	0.0112548	0.00130834
k__Bacteria|p__Proteobacteria|c__Alphaproteobacteria|o__Rhizobiales|f__Xanthobacteraceae|g__Afipia|s__Afipia genosp. 1|ASV025758	Black bird	81	0	0	0
k__Bacteria|p__Proteobacteria|c__Alphaproteobacteria|o__Rhizobiales|f__Xanthobacteraceae|g__Afipia|s__Afipia genosp. 1|ASV025758	Control	2	0.000151745	0.0002146	0.000151745
k__Bacteria|p__Proteobacteria|c__Alphaproteobacteria|o__Rhizobiales|f__Xanthobacteraceae|g__Afipia|s__Afipia genosp. 1|ASV025758	Mallard	107	0	0	0
k__Bacteria|p__Proteobacteria|c__Alphaproteobacteria|o__Rhizobiales|f__Xanthobacteraceae|g__Afipia|s__Afipia genosp. 1|ASV025758	Nathusius bat	87	0	0	0
k__Bacteria|p__Proteobacteria|c__Alphaproteobacteria|o__Rhizobiales|f__Xanthobacteraceae|g__Afipia|s__Afipia genosp. 1|ASV025758	Wood pigeon	74	1.28151e-06	1.1024e-05	1.28151e-06
k__Bacteria|p__Proteobacteria|c__Alphaproteobacteria|o__Rhizobiales|f__Xanthobacteraceae|g__Bradyrhizobium|s__Bradyrhizobium sp. SEMIA 6399|ASV001106	Black bird	81	0	0	0
k__Bacteria|p__Proteobacteria|c__Alphaproteobacteria|o__Rhizobiales|f__Xanthobacteraceae|g__Bradyrhizobium|s__Bradyrhizobium sp. SEMIA 6399|ASV001106	Control	2	0.0179059	0.0253228	0.0179059
k__Bacteria|p__Proteobacteria|c__Alphaproteobacteria|o__Rhizobiales|f__Xanthobacteraceae|g__Bradyrhizobium|s__Bradyrhizobium sp. SEMIA 6399|ASV001106	Mallard	107	1.57956e-05	8.84239e-05	8.54826e-06
k__Bacteria|p__Proteobacteria|c__Alphaproteobacteria|o__Rhizobiales|f__Xanthobacteraceae|g__Bradyrhizobium|s__Bradyrhizobium sp. SEMIA 6399|ASV001106	Nathusius bat	87	2.04852e-06	1.91073e-05	2.04852e-06
k__Bacteria|p__Proteobacteria|c__Alphaproteobacteria|o__Rhizobiales|f__Xanthobacteraceae|g__Bradyrhizobium|s__Bradyrhizobium sp. SEMIA 6399|ASV001106	Wood pigeon	74	0.000173707	0.000952863	0.000110768
k__Bacteria|p__Proteobacteria|c__Alphaproteobacteria|o__Rhodobacterales|f__Rhodobacteraceae|g__Paracoccus|s__|ASV001081	Black bird	81	8.71531e-05	0.000617048	6.85609e-05
k__Bacteria|p__Proteobacteria|c__Alphaproteobacteria|o__Rhodobacterales|f__Rhodobacteraceae|g__Paracoccus|s__|ASV001081	Control	2	0.0100152	0.0141636	0.0100152
k__Bacteria|p__Proteobacteria|c__Alphaproteobacteria|o__Rhodobacterales|f__Rhodobacteraceae|g__Paracoccus|s__|ASV001081	Mallard	107	0	0	0
k__Bacteria|p__Proteobacteria|c__Alphaproteobacteria|o__Rhodobacterales|f__Rhodobacteraceae|g__Paracoccus|s__|ASV001081	Nathusius bat	87	9.03547e-06	8.42773e-05	9.03547e-06
k__Bacteria|p__Proteobacteria|c__Alphaproteobacteria|o__Rhodobacterales|f__Rhodobacteraceae|g__Paracoccus|s__|ASV001081	Wood pigeon	74	0.000332782	0.00224147	0.000260566
k__Bacteria|p__Proteobacteria|c__Alphaproteobacteria|o__Sphingomonadales|f__Sphingomonadaceae|g__Sphingopyxis|s__|ASV000032	Black bird	81	0.0113139	0.0311891	0.00346546
k__Bacteria|p__Proteobacteria|c__Alphaproteobacteria|o__Sphingomonadales|f__Sphingomonadaceae|g__Sphingopyxis|s__|ASV000032	Control	2	0.0303141	0.0119682	0.00846279
k__Bacteria|p__Proteobacteria|c__Alphaproteobacteria|o__Sphingomonadales|f__Sphingomonadaceae|g__Sphingopyxis|s__|ASV000032	Mallard	107	0	0	0
k__Bacteria|p__Proteobacteria|c__Alphaproteobacteria|o__Sphingomonadales|f__Sphingomonadaceae|g__Sphingopyxis|s__|ASV000032	Nathusius bat	87	0	0	0
k__Bacteria|p__Proteobacteria|c__Alphaproteobacteria|o__Sphingomonadales|f__Sphingomonadaceae|g__Sphingopyxis|s__|ASV000032	Wood pigeon	74	0.00266004	0.00604763	0.000703023
k__Bacteria|p__Proteobacteria|c__Gammaproteobacteria|o__Burkholderiales|f__Burkholderiaceae|g__Ralstonia|s__Ralstonia insidiosa|ASV001124	Black bird	81	0	0	0
k__Bacteria|p__Proteobacteria|c__Gammaproteobacteria|o__Burkholderiales|f__Burkholderiaceae|g__Ralstonia|s__Ralstonia insidiosa|ASV001124	Control	2	0.0171472	0.0242498	0.0171472
k__Bacteria|p__Proteobacteria|c__Gammaproteobacteria|o__Burkholderiales|f__Burkholderiaceae|g__Ralstonia|s__Ralstonia insidiosa|ASV001124	Mallard	107	2.01546e-05	8.61137e-05	8.32492e-06
k__Bacteria|p__Proteobacteria|c__Gammaproteobacteria|o__Burkholderiales|f__Burkholderiaceae|g__Ralstonia|s__Ralstonia insidiosa|ASV001124	Nathusius bat	87	6.23201e-06	3.35088e-05	3.59252e-06
k__Bacteria|p__Proteobacteria|c__Gammaproteobacteria|o__Burkholderiales|f__Burkholderiaceae|g__Ralstonia|s__Ralstonia insidiosa|ASV001124	Wood pigeon	74	0.000240139	0.00154524	0.00017963
k__Bacteria|p__Proteobacteria|c__Gammaproteobacteria|o__Enterobacterales|f__Enterobacteriaceae|g__Escherichia-Shigella|s__Escherichia albertii|ASV000115	Black bird	81	0.00335403	0.0187758	0.0020862
k__Bacteria|p__Proteobacteria|c__Gammaproteobacteria|o__Enterobacterales|f__Enterobacteriaceae|g__Escherichia-Shigella|s__Escherichia albertii|ASV000115	Control	2	0.00709063	0.0100277	0.00709063
k__Bacteria|p__Proteobacteria|c__Gammaproteobacteria|o__Enterobacterales|f__Enterobacteriaceae|g__Escherichia-Shigella|s__Escherichia albertii|ASV000115	Mallard	107	0	0	0
k__Bacteria|p__Proteobacteria|c__Gammaproteobacteria|o__Enterobacterales|f__Enterobacteriaceae|g__Escherichia-Shigella|s__Escherichia albertii|ASV000115	Nathusius bat	87	0	0	0
k__Bacteria|p__Proteobacteria|c__Gammaproteobacteria|o__Enterobacterales|f__Enterobacteriaceae|g__Escherichia-Shigella|s__Escherichia albertii|ASV000115	Wood pigeon	74	0	0	0
k__Bacteria|p__Proteobacteria|c__Gammaproteobacteria|o__Enterobacterales|f__Enterobacteriaceae|g__Escherichia-Shigella|s__Escherichia coli|ASV000066	Black bird	81	0.000933328	0.00372933	0.00041437
k__Bacteria|p__Proteobacteria|c__Gammaproteobacteria|o__Enterobacterales|f__Enterobacteriaceae|g__Escherichia-Shigella|s__Escherichia coli|ASV000066	Control	2	0.00343452	0.00485715	0.00343452
k__Bacteria|p__Proteobacteria|c__Gammaproteobacteria|o__Enterobacterales|f__Enterobacteriaceae|g__Escherichia-Shigella|s__Escherichia coli|ASV000066	Mallard	107	6.06083e-05	0.00027873	2.69459e-05
k__Bacteria|p__Proteobacteria|c__Gammaproteobacteria|o__Enterobacterales|f__Enterobacteriaceae|g__Escherichia-Shigella|s__Escherichia coli|ASV000066	Nathusius bat	87	2.09622e-06	1.37477e-05	1.47391e-06
k__Bacteria|p__Proteobacteria|c__Gammaproteobacteria|o__Enterobacterales|f__Enterobacteriaceae|g__Escherichia-Shigella|s__Escherichia coli|ASV000066	Wood pigeon	74	0.00638129	0.0314327	0.00365398
k__Bacteria|p__Proteobacteria|c__Gammaproteobacteria|o__Enterobacterales|f__Enterobacteriaceae|g__Escherichia-Shigella|s__Escherichia coli|ASV000482	Black bird	81	0.00059603	0.00278217	0.00030913
k__Bacteria|p__Proteobacteria|c__Gammaproteobacteria|o__Enterobacterales|f__Enterobacteriaceae|g__Escherichia-Shigella|s__Escherichia coli|ASV000482	Control	2	0.0169954	0.0240352	0.0169954
k__Bacteria|p__Proteobacteria|c__Gammaproteobacteria|o__Enterobacterales|f__Enterobacteriaceae|g__Escherichia-Shigella|s__Escherichia coli|ASV000482	Mallard	107	0	0	0
k__Bacteria|p__Proteobacteria|c__Gammaproteobacteria|o__Enterobacterales|f__Enterobacteriaceae|g__Escherichia-Shigella|s__Escherichia coli|ASV000482	Nathusius bat	87	2.31472e-06	1.53643e-05	1.64722e-06
k__Bacteria|p__Proteobacteria|c__Gammaproteobacteria|o__Enterobacterales|f__Enterobacteriaceae|g__Escherichia-Shigella|s__Escherichia coli|ASV000482	Wood pigeon	74	0.000453474	0.00213136	0.000247766
k__Bacteria|p__Proteobacteria|c__Gammaproteobacteria|o__Enterobacterales|f__Enterobacteriaceae|g__Escherichia-Shigella|s__Escherichia coli|ASV022870	Black bird	81	0	0	0
k__Bacteria|p__Proteobacteria|c__Gammaproteobacteria|o__Enterobacterales|f__Enterobacteriaceae|g__Escherichia-Shigella|s__Escherichia coli|ASV022870	Control	2	0.000110791	0.000156682	0.000110791
k__Bacteria|p__Proteobacteria|c__Gammaproteobacteria|o__Enterobacterales|f__Enterobacteriaceae|g__Escherichia-Shigella|s__Escherichia coli|ASV022870	Mallard	107	0	0	0
k__Bacteria|p__Proteobacteria|c__Gammaproteobacteria|o__Enterobacterales|f__Enterobacteriaceae|g__Escherichia-Shigella|s__Escherichia coli|ASV022870	Nathusius bat	87	0	0	0
k__Bacteria|p__Proteobacteria|c__Gammaproteobacteria|o__Enterobacterales|f__Enterobacteriaceae|g__Escherichia-Shigella|s__Escherichia coli|ASV022870	Wood pigeon	74	1.28151e-06	1.1024e-05	1.28151e-06
k__Bacteria|p__Proteobacteria|c__Gammaproteobacteria|o__Enterobacterales|f__Erwiniaceae|g__Pantoea|s__Pantoea agglomerans|ASV003229	Black bird	81	4.48282e-06	4.03454e-05	4.48282e-06
k__Bacteria|p__Proteobacteria|c__Gammaproteobacteria|o__Enterobacterales|f__Erwiniaceae|g__Pantoea|s__Pantoea agglomerans|ASV003229	Control	2	0.0049856	0.0070507	0.0049856
k__Bacteria|p__Proteobacteria|c__Gammaproteobacteria|o__Enterobacterales|f__Erwiniaceae|g__Pantoea|s__Pantoea agglomerans|ASV003229	Mallard	107	0	0	0
k__Bacteria|p__Proteobacteria|c__Gammaproteobacteria|o__Enterobacterales|f__Erwiniaceae|g__Pantoea|s__Pantoea agglomerans|ASV003229	Nathusius bat	87	6.68504e-06	6.23539e-05	6.68504e-06
k__Bacteria|p__Proteobacteria|c__Gammaproteobacteria|o__Enterobacterales|f__Erwiniaceae|g__Pantoea|s__Pantoea agglomerans|ASV003229	Wood pigeon	74	0	0	0
k__Bacteria|p__Proteobacteria|c__Gammaproteobacteria|o__Pseudomonadales|f__Moraxellaceae|g__Acinetobacter|s__Acinetobacter johnsonii XBB1|ASV004482	Black bird	81	0	0	0
k__Bacteria|p__Proteobacteria|c__Gammaproteobacteria|o__Pseudomonadales|f__Moraxellaceae|g__Acinetobacter|s__Acinetobacter johnsonii XBB1|ASV004482	Control	2	0.0047041	0.0066526	0.0047041
k__Bacteria|p__Proteobacteria|c__Gammaproteobacteria|o__Pseudomonadales|f__Moraxellaceae|g__Acinetobacter|s__Acinetobacter johnsonii XBB1|ASV004482	Mallard	107	0	0	0
k__Bacteria|p__Proteobacteria|c__Gammaproteobacteria|o__Pseudomonadales|f__Moraxellaceae|g__Acinetobacter|s__Acinetobacter johnsonii XBB1|ASV004482	Nathusius bat	87	0	0	0
k__Bacteria|p__Proteobacteria|c__Gammaproteobacteria|o__Pseudomonadales|f__Moraxellaceae|g__Acinetobacter|s__Acinetobacter johnsonii XBB1|ASV004482	Wood pigeon	74	1.56551e-06	1.34671e-05	1.56551e-06
k__Bacteria|p__Proteobacteria|c__Gammaproteobacteria|o__Pseudomonadales|f__Moraxellaceae|g__Acinetobacter|s__|ASV002075	Black bird	81	0.000163905	0.00115715	0.000128573
k__Bacteria|p__Proteobacteria|c__Gammaproteobacteria|o__Pseudomonadales|f__Moraxellaceae|g__Acinetobacter|s__|ASV002075	Control	2	0.00199424	0.00282028	0.00199424
k__Bacteria|p__Proteobacteria|c__Gammaproteobacteria|o__Pseudomonadales|f__Moraxellaceae|g__Acinetobacter|s__|ASV002075	Mallard	107	0	0	0
k__Bacteria|p__Proteobacteria|c__Gammaproteobacteria|o__Pseudomonadales|f__Moraxellaceae|g__Acinetobacter|s__|ASV002075	Nathusius bat	87	0	0	0
k__Bacteria|p__Proteobacteria|c__Gammaproteobacteria|o__Pseudomonadales|f__Moraxellaceae|g__Acinetobacter|s__|ASV002075	Wood pigeon	74	0	0	0
k__Bacteria|p__Proteobacteria|c__Gammaproteobacteria|o__Pseudomonadales|f__Moraxellaceae|g__Psychrobacter|s__Psychrobacter alimentarius|ASV001580	Black bird	81	4.48282e-06	4.03454e-05	4.48282e-06
k__Bacteria|p__Proteobacteria|c__Gammaproteobacteria|o__Pseudomonadales|f__Moraxellaceae|g__Psychrobacter|s__Psychrobacter alimentarius|ASV001580	Control	2	0.0160647	0.0227189	0.0160647
k__Bacteria|p__Proteobacteria|c__Gammaproteobacteria|o__Pseudomonadales|f__Moraxellaceae|g__Psychrobacter|s__Psychrobacter alimentarius|ASV001580	Mallard	107	0	0	0
k__Bacteria|p__Proteobacteria|c__Gammaproteobacteria|o__Pseudomonadales|f__Moraxellaceae|g__Psychrobacter|s__Psychrobacter alimentarius|ASV001580	Nathusius bat	87	0	0	0
k__Bacteria|p__Proteobacteria|c__Gammaproteobacteria|o__Pseudomonadales|f__Moraxellaceae|g__Psychrobacter|s__Psychrobacter alimentarius|ASV001580	Wood pigeon	74	0	0	0
k__Bacteria|p__Proteobacteria|c__Gammaproteobacteria|o__Pseudomonadales|f__Moraxellaceae|g__Psychrobacter|s__Psychrobacter fozii|ASV001229	Black bird	81	0.000169407	0.00143993	0.000159992
k__Bacteria|p__Proteobacteria|c__Gammaproteobacteria|o__Pseudomonadales|f__Moraxellaceae|g__Psychrobacter|s__Psychrobacter fozii|ASV001229	Control	2	0.00288057	0.00407374	0.00288057
k__Bacteria|p__Proteobacteria|c__Gammaproteobacteria|o__Pseudomonadales|f__Moraxellaceae|g__Psychrobacter|s__Psychrobacter fozii|ASV001229	Mallard	107	0	0	0
k__Bacteria|p__Proteobacteria|c__Gammaproteobacteria|o__Pseudomonadales|f__Moraxellaceae|g__Psychrobacter|s__Psychrobacter fozii|ASV001229	Nathusius bat	87	7.25922e-07	6.77095e-06	7.25922e-07
k__Bacteria|p__Proteobacteria|c__Gammaproteobacteria|o__Pseudomonadales|f__Moraxellaceae|g__Psychrobacter|s__Psychrobacter fozii|ASV001229	Wood pigeon	74	0	0	0
k__Bacteria|p__Proteobacteria|c__Gammaproteobacteria|o__Pseudomonadales|f__Pseudomonadaceae|g__Pseudomonas|s__Pseudomonas antarctica|ASV000476	Black bird	81	0.000746864	0.0032897	0.000365523
k__Bacteria|p__Proteobacteria|c__Gammaproteobacteria|o__Pseudomonadales|f__Pseudomonadaceae|g__Pseudomonas|s__Pseudomonas antarctica|ASV000476	Control	2	0.0233769	0.0330599	0.0233769
k__Bacteria|p__Proteobacteria|c__Gammaproteobacteria|o__Pseudomonadales|f__Pseudomonadaceae|g__Pseudomonas|s__Pseudomonas antarctica|ASV000476	Mallard	107	0	0	0
k__Bacteria|p__Proteobacteria|c__Gammaproteobacteria|o__Pseudomonadales|f__Pseudomonadaceae|g__Pseudomonas|s__Pseudomonas antarctica|ASV000476	Nathusius bat	87	2.02506e-06	1.88885e-05	2.02506e-06
k__Bacteria|p__Proteobacteria|c__Gammaproteobacteria|o__Pseudomonadales|f__Pseudomonadaceae|g__Pseudomonas|s__Pseudomonas antarctica|ASV000476	Wood pigeon	74	0	0	0
k__Bacteria|p__Proteobacteria|c__Gammaproteobacteria|o__Pseudomonadales|f__Pseudomonadaceae|g__Pseudomonas|s__Pseudomonas auricularis|ASV022784	Black bird	81	1.07354e-06	9.66184e-06	1.07354e-06
k__Bacteria|p__Proteobacteria|c__Gammaproteobacteria|o__Pseudomonadales|f__Pseudomonadaceae|g__Pseudomonas|s__Pseudomonas auricularis|ASV022784	Control	2	0.000110791	0.000156682	0.000110791
k__Bacteria|p__Proteobacteria|c__Gammaproteobacteria|o__Pseudomonadales|f__Pseudomonadaceae|g__Pseudomonas|s__Pseudomonas auricularis|ASV022784	Mallard	107	0	0	0
k__Bacteria|p__Proteobacteria|c__Gammaproteobacteria|o__Pseudomonadales|f__Pseudomonadaceae|g__Pseudomonas|s__Pseudomonas auricularis|ASV022784	Nathusius bat	87	0	0	0
k__Bacteria|p__Proteobacteria|c__Gammaproteobacteria|o__Pseudomonadales|f__Pseudomonadaceae|g__Pseudomonas|s__Pseudomonas auricularis|ASV022784	Wood pigeon	74	0	0	0
k__Bacteria|p__Proteobacteria|c__Gammaproteobacteria|o__Pseudomonadales|f__Pseudomonadaceae|g__Pseudomonas|s__Pseudomonas lurida|ASV000603	Black bird	81	0.000853501	0.00731488	0.000812764
k__Bacteria|p__Proteobacteria|c__Gammaproteobacteria|o__Pseudomonadales|f__Pseudomonadaceae|g__Pseudomonas|s__Pseudomonas lurida|ASV000603	Control	2	0.0118546	0.016765	0.0118546
k__Bacteria|p__Proteobacteria|c__Gammaproteobacteria|o__Pseudomonadales|f__Pseudomonadaceae|g__Pseudomonas|s__Pseudomonas lurida|ASV000603	Mallard	107	0	0	0
k__Bacteria|p__Proteobacteria|c__Gammaproteobacteria|o__Pseudomonadales|f__Pseudomonadaceae|g__Pseudomonas|s__Pseudomonas lurida|ASV000603	Nathusius bat	87	0	0	0
k__Bacteria|p__Proteobacteria|c__Gammaproteobacteria|o__Pseudomonadales|f__Pseudomonadaceae|g__Pseudomonas|s__Pseudomonas lurida|ASV000603	Wood pigeon	74	0	0	0
k__Bacteria|p__Proteobacteria|c__Gammaproteobacteria|o__Pseudomonadales|f__Pseudomonadaceae|g__Pseudomonas|s__Pseudomonas lurida|ASV026933	Black bird	81	3.00235e-06	2.70212e-05	3.00235e-06
k__Bacteria|p__Proteobacteria|c__Gammaproteobacteria|o__Pseudomonadales|f__Pseudomonadaceae|g__Pseudomonas|s__Pseudomonas lurida|ASV026933	Control	2	0.000110791	0.000156682	0.000110791
k__Bacteria|p__Proteobacteria|c__Gammaproteobacteria|o__Pseudomonadales|f__Pseudomonadaceae|g__Pseudomonas|s__Pseudomonas lurida|ASV026933	Mallard	107	0	0	0
k__Bacteria|p__Proteobacteria|c__Gammaproteobacteria|o__Pseudomonadales|f__Pseudomonadaceae|g__Pseudomonas|s__Pseudomonas lurida|ASV026933	Nathusius bat	87	0	0	0
k__Bacteria|p__Proteobacteria|c__Gammaproteobacteria|o__Pseudomonadales|f__Pseudomonadaceae|g__Pseudomonas|s__Pseudomonas lurida|ASV026933	Wood pigeon	74	0	0	0
k__Bacteria|p__Proteobacteria|c__Gammaproteobacteria|o__Pseudomonadales|f__Pseudomonadaceae|g__Pseudomonas|s__Pseudomonas sp. FDAARGOS_380|ASV000077	Black bird	81	0.00766433	0.0221917	0.00246574
k__Bacteria|p__Proteobacteria|c__Gammaproteobacteria|o__Pseudomonadales|f__Pseudomonadaceae|g__Pseudomonas|s__Pseudomonas sp. FDAARGOS_380|ASV000077	Control	2	0.0507423	0.0717604	0.0507423
k__Bacteria|p__Proteobacteria|c__Gammaproteobacteria|o__Pseudomonadales|f__Pseudomonadaceae|g__Pseudomonas|s__Pseudomonas sp. FDAARGOS_380|ASV000077	Mallard	107	0	0	0
k__Bacteria|p__Proteobacteria|c__Gammaproteobacteria|o__Pseudomonadales|f__Pseudomonadaceae|g__Pseudomonas|s__Pseudomonas sp. FDAARGOS_380|ASV000077	Nathusius bat	87	9.20645e-07	8.5872e-06	9.20645e-07
k__Bacteria|p__Proteobacteria|c__Gammaproteobacteria|o__Pseudomonadales|f__Pseudomonadaceae|g__Pseudomonas|s__Pseudomonas sp. FDAARGOS_380|ASV000077	Wood pigeon	74	0	0	0
k__Bacteria|p__Proteobacteria|c__Gammaproteobacteria|o__Pseudomonadales|f__Pseudomonadaceae|g__Pseudomonas|s__Pseudomonas sp. FDAARGOS_380|ASV012975	Black bird	81	6.04452e-06	4.54175e-05	5.04639e-06
k__Bacteria|p__Proteobacteria|c__Gammaproteobacteria|o__Pseudomonadales|f__Pseudomonadaceae|g__Pseudomonas|s__Pseudomonas sp. FDAARGOS_380|ASV012975	Control	2	0.000110791	0.000156682	0.000110791
k__Bacteria|p__Proteobacteria|c__Gammaproteobacteria|o__Pseudomonadales|f__Pseudomonadaceae|g__Pseudomonas|s__Pseudomonas sp. FDAARGOS_380|ASV012975	Mallard	107	0	0	0
k__Bacteria|p__Proteobacteria|c__Gammaproteobacteria|o__Pseudomonadales|f__Pseudomonadaceae|g__Pseudomonas|s__Pseudomonas sp. FDAARGOS_380|ASV012975	Nathusius bat	87	0	0	0
k__Bacteria|p__Proteobacteria|c__Gammaproteobacteria|o__Pseudomonadales|f__Pseudomonadaceae|g__Pseudomonas|s__Pseudomonas sp. FDAARGOS_380|ASV012975	Wood pigeon	74	0	0	0
k__Bacteria|p__Proteobacteria|c__Gammaproteobacteria|o__Pseudomonadales|f__Pseudomonadaceae|g__Pseudomonas|s__Pseudomonas sp. LG1E9|ASV001436	Black bird	81	0.000215408	0.00101372	0.000112636
k__Bacteria|p__Proteobacteria|c__Gammaproteobacteria|o__Pseudomonadales|f__Pseudomonadaceae|g__Pseudomonas|s__Pseudomonas sp. LG1E9|ASV001436	Control	2	0.00974961	0.013788	0.00974961
k__Bacteria|p__Proteobacteria|c__Gammaproteobacteria|o__Pseudomonadales|f__Pseudomonadaceae|g__Pseudomonas|s__Pseudomonas sp. LG1E9|ASV001436	Mallard	107	0	0	0
k__Bacteria|p__Proteobacteria|c__Gammaproteobacteria|o__Pseudomonadales|f__Pseudomonadaceae|g__Pseudomonas|s__Pseudomonas sp. LG1E9|ASV001436	Nathusius bat	87	0	0	0
k__Bacteria|p__Proteobacteria|c__Gammaproteobacteria|o__Pseudomonadales|f__Pseudomonadaceae|g__Pseudomonas|s__Pseudomonas sp. LG1E9|ASV001436	Wood pigeon	74	0	0	0
k__Bacteria|p__Proteobacteria|c__Gammaproteobacteria|o__Pseudomonadales|f__Pseudomonadaceae|g__Pseudomonas|s__Pseudomonas sp. S09G 359|ASV003666	Black bird	81	5.44851e-05	0.000343298	3.81443e-05
k__Bacteria|p__Proteobacteria|c__Gammaproteobacteria|o__Pseudomonadales|f__Pseudomonadaceae|g__Pseudomonas|s__Pseudomonas sp. S09G 359|ASV003666	Control	2	0.00288057	0.00407374	0.00288057
k__Bacteria|p__Proteobacteria|c__Gammaproteobacteria|o__Pseudomonadales|f__Pseudomonadaceae|g__Pseudomonas|s__Pseudomonas sp. S09G 359|ASV003666	Mallard	107	0	0	0
k__Bacteria|p__Proteobacteria|c__Gammaproteobacteria|o__Pseudomonadales|f__Pseudomonadaceae|g__Pseudomonas|s__Pseudomonas sp. S09G 359|ASV003666	Nathusius bat	87	0	0	0
k__Bacteria|p__Proteobacteria|c__Gammaproteobacteria|o__Pseudomonadales|f__Pseudomonadaceae|g__Pseudomonas|s__Pseudomonas sp. S09G 359|ASV003666	Wood pigeon	74	0	0	0
k__Bacteria|p__Proteobacteria|c__Gammaproteobacteria|o__Pseudomonadales|f__Pseudomonadaceae|g__Pseudomonas|s__Pseudomonas versuta|ASV000204	Black bird	81	0.00306783	0.0123171	0.00136857
k__Bacteria|p__Proteobacteria|c__Gammaproteobacteria|o__Pseudomonadales|f__Pseudomonadaceae|g__Pseudomonas|s__Pseudomonas versuta|ASV000204	Control	2	0.034456	0.0487282	0.034456
k__Bacteria|p__Proteobacteria|c__Gammaproteobacteria|o__Pseudomonadales|f__Pseudomonadaceae|g__Pseudomonas|s__Pseudomonas versuta|ASV000204	Mallard	107	0	0	0
k__Bacteria|p__Proteobacteria|c__Gammaproteobacteria|o__Pseudomonadales|f__Pseudomonadaceae|g__Pseudomonas|s__Pseudomonas versuta|ASV000204	Nathusius bat	87	0	0	0
k__Bacteria|p__Proteobacteria|c__Gammaproteobacteria|o__Pseudomonadales|f__Pseudomonadaceae|g__Pseudomonas|s__Pseudomonas versuta|ASV000204	Wood pigeon	74	0	0	0
k__Bacteria|p__Proteobacteria|c__Gammaproteobacteria|o__Pseudomonadales|f__Pseudomonadaceae|g__Pseudomonas|s__Pseudomonas versuta|ASV010804	Black bird	81	1.8005e-05	9.33735e-05	1.03748e-05
k__Bacteria|p__Proteobacteria|c__Gammaproteobacteria|o__Pseudomonadales|f__Pseudomonadaceae|g__Pseudomonas|s__Pseudomonas versuta|ASV010804	Control	2	0.000221582	0.000313364	0.000221582
k__Bacteria|p__Proteobacteria|c__Gammaproteobacteria|o__Pseudomonadales|f__Pseudomonadaceae|g__Pseudomonas|s__Pseudomonas versuta|ASV010804	Mallard	107	0	0	0
k__Bacteria|p__Proteobacteria|c__Gammaproteobacteria|o__Pseudomonadales|f__Pseudomonadaceae|g__Pseudomonas|s__Pseudomonas versuta|ASV010804	Nathusius bat	87	0	0	0
k__Bacteria|p__Proteobacteria|c__Gammaproteobacteria|o__Pseudomonadales|f__Pseudomonadaceae|g__Pseudomonas|s__Pseudomonas versuta|ASV010804	Wood pigeon	74	0	0	0
k__Bacteria|p__Proteobacteria|c__Gammaproteobacteria|o__Pseudomonadales|f__Pseudomonadaceae|g__Pseudomonas|s__Pseudomonas versuta|ASV011025	Black bird	81	1.22652e-05	5.4953e-05	6.10589e-06
k__Bacteria|p__Proteobacteria|c__Gammaproteobacteria|o__Pseudomonadales|f__Pseudomonadaceae|g__Pseudomonas|s__Pseudomonas versuta|ASV011025	Control	2	0.000332373	0.000470047	0.000332373
k__Bacteria|p__Proteobacteria|c__Gammaproteobacteria|o__Pseudomonadales|f__Pseudomonadaceae|g__Pseudomonas|s__Pseudomonas versuta|ASV011025	Mallard	107	0	0	0
k__Bacteria|p__Proteobacteria|c__Gammaproteobacteria|o__Pseudomonadales|f__Pseudomonadaceae|g__Pseudomonas|s__Pseudomonas versuta|ASV011025	Nathusius bat	87	0	0	0
k__Bacteria|p__Proteobacteria|c__Gammaproteobacteria|o__Pseudomonadales|f__Pseudomonadaceae|g__Pseudomonas|s__Pseudomonas versuta|ASV011025	Wood pigeon	74	0	0	0
k__Bacteria|p__Proteobacteria|c__Gammaproteobacteria|o__Pseudomonadales|f__Pseudomonadaceae|g__Pseudomonas|s__Pseudomonas versuta|ASV027208	Black bird	81	1.10724e-06	9.96512e-06	1.10724e-06
k__Bacteria|p__Proteobacteria|c__Gammaproteobacteria|o__Pseudomonadales|f__Pseudomonadaceae|g__Pseudomonas|s__Pseudomonas versuta|ASV027208	Control	2	0.000110791	0.000156682	0.000110791
k__Bacteria|p__Proteobacteria|c__Gammaproteobacteria|o__Pseudomonadales|f__Pseudomonadaceae|g__Pseudomonas|s__Pseudomonas versuta|ASV027208	Mallard	107	0	0	0
k__Bacteria|p__Proteobacteria|c__Gammaproteobacteria|o__Pseudomonadales|f__Pseudomonadaceae|g__Pseudomonas|s__Pseudomonas versuta|ASV027208	Nathusius bat	87	0	0	0
k__Bacteria|p__Proteobacteria|c__Gammaproteobacteria|o__Pseudomonadales|f__Pseudomonadaceae|g__Pseudomonas|s__Pseudomonas versuta|ASV027208	Wood pigeon	74	0	0	0
k__Bacteria|p__Proteobacteria|c__Gammaproteobacteria|o__Pseudomonadales|f__Pseudomonadaceae|g__Pseudomonas|s__|ASV002473	Black bird	81	0	0	0
k__Bacteria|p__Proteobacteria|c__Gammaproteobacteria|o__Pseudomonadales|f__Pseudomonadaceae|g__Pseudomonas|s__|ASV002473	Control	2	0.0106222	0.015022	0.0106222
k__Bacteria|p__Proteobacteria|c__Gammaproteobacteria|o__Pseudomonadales|f__Pseudomonadaceae|g__Pseudomonas|s__|ASV002473	Mallard	107	0	0	0
k__Bacteria|p__Proteobacteria|c__Gammaproteobacteria|o__Pseudomonadales|f__Pseudomonadaceae|g__Pseudomonas|s__|ASV002473	Nathusius bat	87	0	0	0
k__Bacteria|p__Proteobacteria|c__Gammaproteobacteria|o__Pseudomonadales|f__Pseudomonadaceae|g__Pseudomonas|s__|ASV002473	Wood pigeon	74	7.87435e-06	6.77377e-05	7.87435e-06

## Sheet: 6_eukaryotic_contaminant
The taxonomy of Eukaryotic contaminant amplicon sequence variance (ASVs) present in bird and bat fecal samples.
	Kingdom	Phylum	Class	Order	Family	Genus	Species
ASV000154	k__Bacteria	p__Cyanobacteria	c__Cyanobacteriia	o__Chloroplast	f__Nicotiana tabacum (common tobacco)	g__	s__
ASV000181	k__Bacteria	p__Cyanobacteria	c__Cyanobacteriia	o__Chloroplast	f__Morus indica	g__	s__
ASV000236	k__Bacteria	p__Cyanobacteria	c__Cyanobacteriia	o__Chloroplast	f__	g__	s__
ASV000347	k__Bacteria	p__Cyanobacteria	c__Cyanobacteriia	o__Chloroplast	f__Morus indica	g__	s__
ASV000445	k__Bacteria	p__Cyanobacteria	c__Cyanobacteriia	o__Chloroplast	f__	g__	s__
ASV000462	k__Bacteria	p__Cyanobacteria	c__Cyanobacteriia	o__Chloroplast	f__Hydra vulgaris	g__	s__
ASV000483	k__Bacteria	p__Cyanobacteria	c__Cyanobacteriia	o__Chloroplast	f__Picea glauca (white spruce)	g__	s__
ASV000528	k__Bacteria	p__Cyanobacteria	c__Cyanobacteriia	o__Chloroplast	f__	g__	s__
ASV000714	k__Bacteria	p__Cyanobacteria	c__Cyanobacteriia	o__Chloroplast	f__	g__	s__
ASV000723	k__Bacteria	p__Cyanobacteria	c__Cyanobacteriia	o__Chloroplast	f__Sanionia uncinata	g__	s__
ASV000745	k__Bacteria	p__Cyanobacteria	c__Cyanobacteriia	o__Chloroplast	f__	g__	s__
ASV000769	k__Bacteria	p__Cyanobacteria	c__Cyanobacteriia	o__Chloroplast	f__Gossypium arboreum	g__	s__
ASV000806	k__Bacteria	p__Cyanobacteria	c__Cyanobacteriia	o__Chloroplast	f__	g__	s__
ASV000837	k__Bacteria	p__Cyanobacteria	c__Cyanobacteriia	o__Chloroplast	f__	g__	s__
ASV000898	k__Bacteria	p__Cyanobacteria	c__Cyanobacteriia	o__Chloroplast	f__Betula pendula (European white birch)	g__	s__
ASV001135	k__Bacteria	p__Cyanobacteria	c__Cyanobacteriia	o__Chloroplast	f__	g__	s__
ASV001140	k__Bacteria	p__Cyanobacteria	c__Cyanobacteriia	o__Chloroplast	f__Picea glauca (white spruce)	g__	s__
ASV001142	k__Bacteria	p__Cyanobacteria	c__Cyanobacteriia	o__Chloroplast	f__Vaccinium macrocarpon	g__	s__
ASV001188	k__Bacteria	p__Cyanobacteria	c__Cyanobacteriia	o__Chloroplast	f__Castanea mollissima (Chinese chestnut)	g__	s__
ASV001201	k__Bacteria	p__Cyanobacteria	c__Cyanobacteriia	o__Chloroplast	f__	g__	s__
ASV001206	k__Bacteria	p__Cyanobacteria	c__Cyanobacteriia	o__Chloroplast	f__Coccomyxa simplex	g__	s__
ASV001271	k__Bacteria	p__Cyanobacteria	c__Cyanobacteriia	o__Chloroplast	f__Symbiochloris handae	g__	s__
ASV001282	k__Bacteria	p__Cyanobacteria	c__Cyanobacteriia	o__Chloroplast	f__	g__	s__
ASV001332	k__Bacteria	p__Cyanobacteria	c__Cyanobacteriia	o__Chloroplast	f__Calycanthus floridus var. glaucus	g__	s__
ASV001335	k__Bacteria	p__Cyanobacteria	c__Cyanobacteriia	o__Chloroplast	f__Sphagnum angustifolium	g__	s__
ASV001340	k__Bacteria	p__Cyanobacteria	c__Cyanobacteriia	o__Chloroplast	f__Morus indica	g__	s__
ASV001419	k__Bacteria	p__Cyanobacteria	c__Cyanobacteriia	o__Chloroplast	f__Elliptochloris bilobata	g__	s__
ASV001590	k__Bacteria	p__Cyanobacteria	c__Cyanobacteriia	o__Chloroplast	f__Coccomyxa viridis	g__	s__
ASV001594	k__Bacteria	p__Cyanobacteria	c__Cyanobacteriia	o__Chloroplast	f__Elliptochloris bilobata	g__	s__
ASV001689	k__Bacteria	p__Cyanobacteria	c__Cyanobacteriia	o__Chloroplast	f__	g__	s__
ASV001836	k__Bacteria	p__Cyanobacteria	c__Cyanobacteriia	o__Chloroplast	f__Morus indica	g__	s__
ASV001863	k__Bacteria	p__Cyanobacteria	c__Cyanobacteriia	o__Chloroplast	f__Dryopteris fragrans	g__	s__
ASV001926	k__Bacteria	p__Cyanobacteria	c__Cyanobacteriia	o__Chloroplast	f__Coccomyxa viridis	g__	s__
ASV001944	k__Bacteria	p__Cyanobacteria	c__Cyanobacteriia	o__Chloroplast	f__Symbiochloris handae	g__	s__
ASV001947	k__Bacteria	p__Cyanobacteria	c__Cyanobacteriia	o__Chloroplast	f__Coccomyxa viridis	g__	s__
ASV002010	k__Bacteria	p__Cyanobacteria	c__Cyanobacteriia	o__Chloroplast	f__	g__	s__
ASV002014	k__Bacteria	p__Cyanobacteria	c__Cyanobacteriia	o__Chloroplast	f__Sanionia uncinata	g__	s__
ASV002133	k__Bacteria	p__Cyanobacteria	c__Cyanobacteriia	o__Chloroplast	f__Hydra vulgaris	g__	s__
ASV002220	k__Bacteria	p__Cyanobacteria	c__Cyanobacteriia	o__Chloroplast	f__Morus indica	g__	s__
ASV002229	k__Bacteria	p__Cyanobacteria	c__Cyanobacteriia	o__Chloroplast	f__	g__	s__
ASV002258	k__Bacteria	p__Cyanobacteria	c__Cyanobacteriia	o__Chloroplast	f__	g__	s__
ASV002341	k__Bacteria	p__Cyanobacteria	c__Cyanobacteriia	o__Chloroplast	f__Paradoxia multiseta	g__	s__
ASV002348	k__Bacteria	p__Cyanobacteria	c__Cyanobacteriia	o__Chloroplast	f__	g__	s__
ASV002423	k__Bacteria	p__Cyanobacteria	c__Cyanobacteriia	o__Chloroplast	f__Hydra vulgaris	g__	s__
ASV002437	k__Bacteria	p__Cyanobacteria	c__Cyanobacteriia	o__Chloroplast	f__	g__	s__
ASV002575	k__Bacteria	p__Cyanobacteria	c__Cyanobacteriia	o__Chloroplast	f__Dryopteris fragrans	g__	s__
ASV002596	k__Bacteria	p__Cyanobacteria	c__Cyanobacteriia	o__Chloroplast	f__Taxus mairei	g__	s__
ASV002660	k__Bacteria	p__Cyanobacteria	c__Cyanobacteriia	o__Chloroplast	f__	g__	s__
ASV002702	k__Bacteria	p__Cyanobacteria	c__Cyanobacteriia	o__Chloroplast	f__Castanea mollissima (Chinese chestnut)	g__	s__
ASV002791	k__Bacteria	p__Cyanobacteria	c__Cyanobacteriia	o__Chloroplast	f__	g__	s__
ASV002809	k__Bacteria	p__Cyanobacteria	c__Cyanobacteriia	o__Chloroplast	f__Chloromonas perforata	g__	s__
ASV002828	k__Bacteria	p__Cyanobacteria	c__Cyanobacteriia	o__Chloroplast	f__Coccomyxa viridis	g__	s__
ASV002847	k__Bacteria	p__Cyanobacteria	c__Cyanobacteriia	o__Chloroplast	f__	g__	s__
ASV003060	k__Bacteria	p__Cyanobacteria	c__Cyanobacteriia	o__Chloroplast	f__	g__	s__
ASV003107	k__Bacteria	p__Cyanobacteria	c__Cyanobacteriia	o__Chloroplast	f__Nicotiana tabacum (common tobacco)	g__	s__
ASV003463	k__Bacteria	p__Cyanobacteria	c__Cyanobacteriia	o__Chloroplast	f__	g__	s__
ASV003608	k__Bacteria	p__Cyanobacteria	c__Cyanobacteriia	o__Chloroplast	f__Calycanthus floridus var. glaucus	g__	s__
ASV003635	k__Bacteria	p__Cyanobacteria	c__Cyanobacteriia	o__Chloroplast	f__Amborella trichopoda	g__	s__
ASV003641	k__Bacteria	p__Cyanobacteria	c__Cyanobacteriia	o__Chloroplast	f__	g__	s__
ASV003644	k__Bacteria	p__Cyanobacteria	c__Cyanobacteriia	o__Chloroplast	f__Elliptochloris bilobata	g__	s__
ASV003671	k__Bacteria	p__Cyanobacteria	c__Cyanobacteriia	o__Chloroplast	f__	g__	s__
ASV003686	k__Bacteria	p__Cyanobacteria	c__Cyanobacteriia	o__Chloroplast	f__	g__	s__
ASV003698	k__Bacteria	p__Cyanobacteria	c__Cyanobacteriia	o__Chloroplast	f__Gloeotilopsis sterilis	g__	s__
ASV003918	k__Bacteria	p__Cyanobacteria	c__Cyanobacteriia	o__Chloroplast	f__Picea glauca (white spruce)	g__	s__
ASV003957	k__Bacteria	p__Cyanobacteria	c__Cyanobacteriia	o__Chloroplast	f__	g__	s__
ASV004050	k__Bacteria	p__Cyanobacteria	c__Cyanobacteriia	o__Chloroplast	f__	g__	s__
ASV004121	k__Bacteria	p__Cyanobacteria	c__Cyanobacteriia	o__Chloroplast	f__	g__	s__
ASV004170	k__Bacteria	p__Cyanobacteria	c__Cyanobacteriia	o__Chloroplast	f__	g__	s__
ASV004183	k__Bacteria	p__Cyanobacteria	c__Cyanobacteriia	o__Chloroplast	f__Coccomyxa viridis	g__	s__
ASV004194	k__Bacteria	p__Cyanobacteria	c__Cyanobacteriia	o__Chloroplast	f__Klebsormidium nitens	g__	s__
ASV004383	k__Bacteria	p__Cyanobacteria	c__Cyanobacteriia	o__Chloroplast	f__Pseudochlorella pringsheimii	g__	s__
ASV004412	k__Bacteria	p__Cyanobacteria	c__Cyanobacteriia	o__Chloroplast	f__Morus indica	g__	s__
ASV004423	k__Bacteria	p__Cyanobacteria	c__Cyanobacteriia	o__Chloroplast	f__Dryopteris fragrans	g__	s__
ASV004656	k__Bacteria	p__Cyanobacteria	c__Cyanobacteriia	o__Chloroplast	f__Castanea mollissima (Chinese chestnut)	g__	s__
ASV004715	k__Bacteria	p__Cyanobacteria	c__Cyanobacteriia	o__Chloroplast	f__Bracteacoccus aerius	g__	s__
ASV004717	k__Bacteria	p__Cyanobacteria	c__Cyanobacteriia	o__Chloroplast	f__	g__	s__
ASV004811	k__Bacteria	p__Cyanobacteria	c__Cyanobacteriia	o__Chloroplast	f__Klebsormidium nitens	g__	s__
ASV004857	k__Bacteria	p__Cyanobacteria	c__Cyanobacteriia	o__Chloroplast	f__	g__	s__
ASV004885	k__Bacteria	p__Cyanobacteria	c__Cyanobacteriia	o__Chloroplast	f__	g__	s__
ASV004929	k__Bacteria	p__Cyanobacteria	c__Cyanobacteriia	o__Chloroplast	f__Castanea mollissima (Chinese chestnut)	g__	s__
ASV004974	k__Bacteria	p__Cyanobacteria	c__Cyanobacteriia	o__Chloroplast	f__	g__	s__
ASV005015	k__Bacteria	p__Cyanobacteria	c__Cyanobacteriia	o__Chloroplast	f__	g__	s__
ASV005075	k__Bacteria	p__Cyanobacteria	c__Cyanobacteriia	o__Chloroplast	f__	g__	s__
ASV005093	k__Bacteria	p__Cyanobacteria	c__Cyanobacteriia	o__Chloroplast	f__	g__	s__
ASV005336	k__Bacteria	p__Cyanobacteria	c__Cyanobacteriia	o__Chloroplast	f__	g__	s__
ASV005382	k__Bacteria	p__Cyanobacteria	c__Cyanobacteriia	o__Chloroplast	f__	g__	s__
ASV005383	k__Bacteria	p__Cyanobacteria	c__Cyanobacteriia	o__Chloroplast	f__Elliptochloris bilobata	g__	s__
ASV005439	k__Bacteria	p__Cyanobacteria	c__Cyanobacteriia	o__Chloroplast	f__Nicotiana tabacum (common tobacco)	g__	s__
ASV005761	k__Bacteria	p__Cyanobacteria	c__Cyanobacteriia	o__Chloroplast	f__Dryopteris fragrans	g__	s__
ASV005903	k__Bacteria	p__Cyanobacteria	c__Cyanobacteriia	o__Chloroplast	f__Bracteacoccus aerius	g__	s__
ASV006037	k__Bacteria	p__Cyanobacteria	c__Cyanobacteriia	o__Chloroplast	f__	g__	s__
ASV006127	k__Bacteria	p__Cyanobacteria	c__Cyanobacteriia	o__Chloroplast	f__Morus indica	g__	s__
ASV006134	k__Bacteria	p__Cyanobacteria	c__Cyanobacteriia	o__Chloroplast	f__	g__	s__
ASV006150	k__Bacteria	p__Cyanobacteria	c__Cyanobacteriia	o__Chloroplast	f__Amborella trichopoda	g__	s__
ASV006166	k__Bacteria	p__Cyanobacteria	c__Cyanobacteriia	o__Chloroplast	f__Chloromonas perforata	g__	s__
ASV006194	k__Bacteria	p__Cyanobacteria	c__Cyanobacteriia	o__Chloroplast	f__Coccomyxa viridis	g__	s__
ASV006212	k__Bacteria	p__Cyanobacteria	c__Cyanobacteriia	o__Chloroplast	f__Pseudomuriella schumacherensis	g__	s__
ASV006244	k__Bacteria	p__Cyanobacteria	c__Cyanobacteriia	o__Chloroplast	f__	g__	s__
ASV006247	k__Bacteria	p__Cyanobacteria	c__Cyanobacteriia	o__Chloroplast	f__Auxenochlorella protothecoides	g__	s__
ASV006315	k__Bacteria	p__Cyanobacteria	c__Cyanobacteriia	o__Chloroplast	f__	g__	s__
ASV006348	k__Bacteria	p__Cyanobacteria	c__Cyanobacteriia	o__Chloroplast	f__Neglectella solitaria	g__	s__
ASV006487	k__Bacteria	p__Cyanobacteria	c__Cyanobacteriia	o__Chloroplast	f__Vaccinium macrocarpon	g__	s__
ASV006888	k__Bacteria	p__Cyanobacteria	c__Cyanobacteriia	o__Chloroplast	f__Sphagnum angustifolium	g__	s__
ASV006906	k__Bacteria	p__Cyanobacteria	c__Cyanobacteriia	o__Chloroplast	f__Bracteacoccus minor	g__	s__
ASV007059	k__Bacteria	p__Cyanobacteria	c__Cyanobacteriia	o__Chloroplast	f__Nyholmiella obtusifolia	g__	s__
ASV007141	k__Bacteria	p__Cyanobacteria	c__Cyanobacteriia	o__Chloroplast	f__Castanea mollissima (Chinese chestnut)	g__	s__
ASV007274	k__Bacteria	p__Cyanobacteria	c__Cyanobacteriia	o__Chloroplast	f__Elliptochloris bilobata	g__	s__
ASV007305	k__Bacteria	p__Cyanobacteria	c__Cyanobacteriia	o__Chloroplast	f__	g__	s__
ASV007316	k__Bacteria	p__Cyanobacteria	c__Cyanobacteriia	o__Chloroplast	f__	g__	s__
ASV007326	k__Bacteria	p__Cyanobacteria	c__Cyanobacteriia	o__Chloroplast	f__Coccomyxa viridis	g__	s__
ASV007438	k__Bacteria	p__Cyanobacteria	c__Cyanobacteriia	o__Chloroplast	f__	g__	s__
ASV007622	k__Bacteria	p__Cyanobacteria	c__Cyanobacteriia	o__Chloroplast	f__Elliptochloris bilobata	g__	s__
ASV007671	k__Bacteria	p__Cyanobacteria	c__Cyanobacteriia	o__Chloroplast	f__Monoraphidium neglectum	g__	s__
ASV007705	k__Bacteria	p__Cyanobacteria	c__Cyanobacteriia	o__Chloroplast	f__Elliptochloris bilobata	g__	s__
ASV007776	k__Bacteria	p__Cyanobacteria	c__Cyanobacteriia	o__Chloroplast	f__Dryopteris fragrans	g__	s__
ASV007897	k__Bacteria	p__Cyanobacteria	c__Cyanobacteriia	o__Chloroplast	f__	g__	s__
ASV007941	k__Bacteria	p__Cyanobacteria	c__Cyanobacteriia	o__Chloroplast	f__	g__	s__
ASV008095	k__Bacteria	p__Cyanobacteria	c__Cyanobacteriia	o__Chloroplast	f__Bazzania trilobata	g__	s__
ASV008141	k__Bacteria	p__Cyanobacteria	c__Cyanobacteriia	o__Chloroplast	f__Dryopteris fragrans	g__	s__
ASV008202	k__Bacteria	p__Cyanobacteria	c__Cyanobacteriia	o__Chloroplast	f__Eimeria praecox	g__	s__
ASV008224	k__Bacteria	p__Cyanobacteria	c__Cyanobacteriia	o__Chloroplast	f__Sanionia uncinata	g__	s__
ASV008590	k__Bacteria	p__Cyanobacteria	c__Cyanobacteriia	o__Chloroplast	f__Lactuca sativa	g__	s__
ASV008693	k__Bacteria	p__Cyanobacteria	c__Cyanobacteriia	o__Chloroplast	f__Stichococcus bacillaris	g__	s__
ASV008857	k__Bacteria	p__Cyanobacteria	c__Cyanobacteriia	o__Chloroplast	f__Sphagnum angustifolium	g__	s__
ASV008883	k__Bacteria	p__Cyanobacteria	c__Cyanobacteriia	o__Chloroplast	f__	g__	s__
ASV009021	k__Bacteria	p__Cyanobacteria	c__Cyanobacteriia	o__Chloroplast	f__Auxenochlorella protothecoides	g__	s__
ASV009072	k__Bacteria	p__Cyanobacteria	c__Cyanobacteriia	o__Chloroplast	f__	g__	s__
ASV009103	k__Bacteria	p__Cyanobacteria	c__Cyanobacteriia	o__Chloroplast	f__Hydra vulgaris	g__	s__
ASV009202	k__Bacteria	p__Cyanobacteria	c__Cyanobacteriia	o__Chloroplast	f__Castanea mollissima (Chinese chestnut)	g__	s__
ASV009223	k__Bacteria	p__Cyanobacteria	c__Cyanobacteriia	o__Chloroplast	f__Hydra vulgaris	g__	s__
ASV009697	k__Bacteria	p__Cyanobacteria	c__Cyanobacteriia	o__Chloroplast	f__Elliptochloris bilobata	g__	s__
ASV009764	k__Bacteria	p__Cyanobacteria	c__Cyanobacteriia	o__Chloroplast	f__	g__	s__
ASV009821	k__Bacteria	p__Cyanobacteria	c__Cyanobacteriia	o__Chloroplast	f__	g__	s__
ASV010016	k__Bacteria	p__Cyanobacteria	c__Cyanobacteriia	o__Chloroplast	f__Symbiochloris handae	g__	s__
ASV010041	k__Bacteria	p__Cyanobacteria	c__Cyanobacteriia	o__Chloroplast	f__Betula pendula (European white birch)	g__	s__
ASV010071	k__Bacteria	p__Cyanobacteria	c__Cyanobacteriia	o__Chloroplast	f__Chlamydomonas reinhardtii	g__	s__
ASV010113	k__Bacteria	p__Cyanobacteria	c__Cyanobacteriia	o__Chloroplast	f__	g__	s__
ASV010208	k__Bacteria	p__Cyanobacteria	c__Cyanobacteriia	o__Chloroplast	f__	g__	s__
ASV010352	k__Bacteria	p__Cyanobacteria	c__Cyanobacteriia	o__Chloroplast	f__Nymphaea alba	g__	s__
ASV010623	k__Bacteria	p__Cyanobacteria	c__Cyanobacteriia	o__Chloroplast	f__	g__	s__
ASV010673	k__Bacteria	p__Cyanobacteria	c__Cyanobacteriia	o__Chloroplast	f__Dryopteris fragrans	g__	s__
ASV010760	k__Bacteria	p__Cyanobacteria	c__Cyanobacteriia	o__Chloroplast	f__Elliptochloris bilobata	g__	s__
ASV010809	k__Bacteria	p__Cyanobacteria	c__Cyanobacteriia	o__Chloroplast	f__Castanea mollissima (Chinese chestnut)	g__	s__
ASV011016	k__Bacteria	p__Cyanobacteria	c__Cyanobacteriia	o__Chloroplast	f__	g__	s__
ASV011067	k__Bacteria	p__Cyanobacteria	c__Cyanobacteriia	o__Chloroplast	f__	g__	s__
ASV011189	k__Bacteria	p__Cyanobacteria	c__Cyanobacteriia	o__Chloroplast	f__	g__	s__
ASV011270	k__Bacteria	p__Cyanobacteria	c__Cyanobacteriia	o__Chloroplast	f__Calycanthus floridus var. glaucus	g__	s__
ASV011303	k__Bacteria	p__Cyanobacteria	c__Cyanobacteriia	o__Chloroplast	f__Nicotiana tabacum (common tobacco)	g__	s__
ASV011327	k__Bacteria	p__Cyanobacteria	c__Cyanobacteriia	o__Chloroplast	f__	g__	s__
ASV011451	k__Bacteria	p__Cyanobacteria	c__Cyanobacteriia	o__Chloroplast	f__Nicotiana tabacum (common tobacco)	g__	s__
ASV011577	k__Bacteria	p__Cyanobacteria	c__Cyanobacteriia	o__Chloroplast	f__Symbiochloris handae	g__	s__
ASV011582	k__Bacteria	p__Cyanobacteria	c__Cyanobacteriia	o__Chloroplast	f__Elliptochloris bilobata	g__	s__
ASV011678	k__Bacteria	p__Cyanobacteria	c__Cyanobacteriia	o__Chloroplast	f__	g__	s__
ASV011897	k__Bacteria	p__Cyanobacteria	c__Cyanobacteriia	o__Chloroplast	f__Symbiochloris handae	g__	s__
ASV011898	k__Bacteria	p__Cyanobacteria	c__Cyanobacteriia	o__Chloroplast	f__Chlorella vulgaris	g__	s__
ASV011965	k__Bacteria	p__Cyanobacteria	c__Cyanobacteriia	o__Chloroplast	f__Castanea mollissima (Chinese chestnut)	g__	s__
ASV011996	k__Bacteria	p__Cyanobacteria	c__Cyanobacteriia	o__Chloroplast	f__	g__	s__
ASV012117	k__Bacteria	p__Cyanobacteria	c__Cyanobacteriia	o__Chloroplast	f__Morus indica	g__	s__
ASV012130	k__Bacteria	p__Cyanobacteria	c__Cyanobacteriia	o__Chloroplast	f__Castanea mollissima (Chinese chestnut)	g__	s__
ASV012252	k__Bacteria	p__Cyanobacteria	c__Cyanobacteriia	o__Chloroplast	f__	g__	s__
ASV012441	k__Bacteria	p__Cyanobacteria	c__Cyanobacteriia	o__Chloroplast	f__	g__	s__
ASV012593	k__Bacteria	p__Cyanobacteria	c__Cyanobacteriia	o__Chloroplast	f__Phaseolus vulgaris	g__	s__
ASV012655	k__Bacteria	p__Cyanobacteria	c__Cyanobacteriia	o__Chloroplast	f__Panax ginseng	g__	s__
ASV012712	k__Bacteria	p__Cyanobacteria	c__Cyanobacteriia	o__Chloroplast	f__	g__	s__
ASV012754	k__Bacteria	p__Cyanobacteria	c__Cyanobacteriia	o__Chloroplast	f__Edaphochlorella mirabilis	g__	s__
ASV012852	k__Bacteria	p__Cyanobacteria	c__Cyanobacteriia	o__Chloroplast	f__	g__	s__
ASV012929	k__Bacteria	p__Cyanobacteria	c__Cyanobacteriia	o__Chloroplast	f__	g__	s__
ASV013012	k__Bacteria	p__Cyanobacteria	c__Cyanobacteriia	o__Chloroplast	f__	g__	s__
ASV013197	k__Bacteria	p__Cyanobacteria	c__Cyanobacteriia	o__Chloroplast	f__Hydra vulgaris	g__	s__
ASV013329	k__Bacteria	p__Cyanobacteria	c__Cyanobacteriia	o__Chloroplast	f__	g__	s__
ASV013489	k__Bacteria	p__Cyanobacteria	c__Cyanobacteriia	o__Chloroplast	f__	g__	s__
ASV013553	k__Bacteria	p__Cyanobacteria	c__Cyanobacteriia	o__Chloroplast	f__Microthamnion kuetzingianum	g__	s__
ASV013600	k__Bacteria	p__Cyanobacteria	c__Cyanobacteriia	o__Chloroplast	f__	g__	s__
ASV013833	k__Bacteria	p__Cyanobacteria	c__Cyanobacteriia	o__Chloroplast	f__Castanea mollissima (Chinese chestnut)	g__	s__
ASV013898	k__Bacteria	p__Cyanobacteria	c__Cyanobacteriia	o__Chloroplast	f__Cymatopleura solea	g__	s__
ASV013957	k__Bacteria	p__Cyanobacteria	c__Cyanobacteriia	o__Chloroplast	f__	g__	s__
ASV013976	k__Bacteria	p__Cyanobacteria	c__Cyanobacteriia	o__Chloroplast	f__	g__	s__
ASV014072	k__Bacteria	p__Cyanobacteria	c__Cyanobacteriia	o__Chloroplast	f__Vischeria sp. CAUP Q 202	g__	s__
ASV014150	k__Bacteria	p__Cyanobacteria	c__Cyanobacteriia	o__Chloroplast	f__Symbiochloris handae	g__	s__
ASV014188	k__Bacteria	p__Cyanobacteria	c__Cyanobacteriia	o__Chloroplast	f__	g__	s__
ASV014414	k__Bacteria	p__Cyanobacteria	c__Cyanobacteriia	o__Chloroplast	f__Hydra vulgaris	g__	s__
ASV014416	k__Bacteria	p__Cyanobacteria	c__Cyanobacteriia	o__Chloroplast	f__	g__	s__
ASV014564	k__Bacteria	p__Cyanobacteria	c__Cyanobacteriia	o__Chloroplast	f__	g__	s__
ASV014813	k__Bacteria	p__Cyanobacteria	c__Cyanobacteriia	o__Chloroplast	f__Coccomyxa viridis	g__	s__
ASV014882	k__Bacteria	p__Cyanobacteria	c__Cyanobacteriia	o__Chloroplast	f__	g__	s__
ASV014998	k__Bacteria	p__Cyanobacteria	c__Cyanobacteriia	o__Chloroplast	f__	g__	s__
ASV015072	k__Bacteria	p__Cyanobacteria	c__Cyanobacteriia	o__Chloroplast	f__Calycanthus floridus var. glaucus	g__	s__
ASV015090	k__Bacteria	p__Cyanobacteria	c__Cyanobacteriia	o__Chloroplast	f__Nyholmiella obtusifolia	g__	s__
ASV015209	k__Bacteria	p__Cyanobacteria	c__Cyanobacteriia	o__Chloroplast	f__	g__	s__
ASV015251	k__Bacteria	p__Cyanobacteria	c__Cyanobacteriia	o__Chloroplast	f__Eimeria praecox	g__	s__
ASV015279	k__Bacteria	p__Cyanobacteria	c__Cyanobacteriia	o__Chloroplast	f__Coccomyxa viridis	g__	s__
ASV015375	k__Bacteria	p__Cyanobacteria	c__Cyanobacteriia	o__Chloroplast	f__Lactuca sativa	g__	s__
ASV015528	k__Bacteria	p__Cyanobacteria	c__Cyanobacteriia	o__Chloroplast	f__Morus indica	g__	s__
ASV015544	k__Bacteria	p__Cyanobacteria	c__Cyanobacteriia	o__Chloroplast	f__Hydra vulgaris	g__	s__
ASV015710	k__Bacteria	p__Cyanobacteria	c__Cyanobacteriia	o__Chloroplast	f__Castanea mollissima (Chinese chestnut)	g__	s__
ASV015990	k__Bacteria	p__Cyanobacteria	c__Cyanobacteriia	o__Chloroplast	f__	g__	s__
ASV016011	k__Bacteria	p__Cyanobacteria	c__Cyanobacteriia	o__Chloroplast	f__	g__	s__
ASV016261	k__Bacteria	p__Cyanobacteria	c__Cyanobacteriia	o__Chloroplast	f__Elliptochloris bilobata	g__	s__
ASV016446	k__Bacteria	p__Cyanobacteria	c__Cyanobacteriia	o__Chloroplast	f__	g__	s__
ASV016514	k__Bacteria	p__Cyanobacteria	c__Cyanobacteriia	o__Chloroplast	f__	g__	s__
ASV016559	k__Bacteria	p__Cyanobacteria	c__Cyanobacteriia	o__Chloroplast	f__Morus indica	g__	s__
ASV016735	k__Bacteria	p__Cyanobacteria	c__Cyanobacteriia	o__Chloroplast	f__Coccomyxa simplex	g__	s__
ASV016937	k__Bacteria	p__Cyanobacteria	c__Cyanobacteriia	o__Chloroplast	f__Cyperus alternifolius	g__	s__
ASV016984	k__Bacteria	p__Cyanobacteria	c__Cyanobacteriia	o__Chloroplast	f__	g__	s__
ASV017056	k__Bacteria	p__Cyanobacteria	c__Cyanobacteriia	o__Chloroplast	f__	g__	s__
ASV017070	k__Bacteria	p__Cyanobacteria	c__Cyanobacteriia	o__Chloroplast	f__	g__	s__
ASV017072	k__Bacteria	p__Cyanobacteria	c__Cyanobacteriia	o__Chloroplast	f__	g__	s__
ASV017080	k__Bacteria	p__Cyanobacteria	c__Cyanobacteriia	o__Chloroplast	f__Hydra vulgaris	g__	s__
ASV017116	k__Bacteria	p__Cyanobacteria	c__Cyanobacteriia	o__Chloroplast	f__	g__	s__
ASV017121	k__Bacteria	p__Cyanobacteria	c__Cyanobacteriia	o__Chloroplast	f__Triticum aestivum (bread wheat)	g__	s__
ASV017297	k__Bacteria	p__Cyanobacteria	c__Cyanobacteriia	o__Chloroplast	f__Didymosphenia geminata	g__	s__
ASV017513	k__Bacteria	p__Cyanobacteria	c__Cyanobacteriia	o__Chloroplast	f__	g__	s__
ASV017528	k__Bacteria	p__Cyanobacteria	c__Cyanobacteriia	o__Chloroplast	f__Calycanthus floridus var. glaucus	g__	s__
ASV017589	k__Bacteria	p__Cyanobacteria	c__Cyanobacteriia	o__Chloroplast	f__Picochlorum sp. 'soloecismus'	g__	s__
ASV017776	k__Bacteria	p__Cyanobacteria	c__Cyanobacteriia	o__Chloroplast	f__Elliptochloris bilobata	g__	s__
ASV017866	k__Bacteria	p__Cyanobacteria	c__Cyanobacteriia	o__Chloroplast	f__Coccomyxa viridis	g__	s__
ASV018062	k__Bacteria	p__Cyanobacteria	c__Cyanobacteriia	o__Chloroplast	f__Poterioochromonas sp. DS	g__	s__
ASV018105	k__Bacteria	p__Cyanobacteria	c__Cyanobacteriia	o__Chloroplast	f__	g__	s__
ASV018316	k__Bacteria	p__Cyanobacteria	c__Cyanobacteriia	o__Chloroplast	f__Paradoxia multiseta	g__	s__
ASV018651	k__Bacteria	p__Cyanobacteria	c__Cyanobacteriia	o__Chloroplast	f__	g__	s__
ASV018696	k__Bacteria	p__Cyanobacteria	c__Cyanobacteriia	o__Chloroplast	f__	g__	s__
ASV018858	k__Bacteria	p__Cyanobacteria	c__Cyanobacteriia	o__Chloroplast	f__Pseudochlorella pringsheimii	g__	s__
ASV018882	k__Bacteria	p__Cyanobacteria	c__Cyanobacteriia	o__Chloroplast	f__	g__	s__
ASV018914	k__Bacteria	p__Cyanobacteria	c__Cyanobacteriia	o__Chloroplast	f__Coccomyxa viridis	g__	s__
ASV018922	k__Bacteria	p__Cyanobacteria	c__Cyanobacteriia	o__Chloroplast	f__	g__	s__
ASV018981	k__Bacteria	p__Cyanobacteria	c__Cyanobacteriia	o__Chloroplast	f__	g__	s__
ASV019109	k__Bacteria	p__Cyanobacteria	c__Cyanobacteriia	o__Chloroplast	f__Elliptochloris bilobata	g__	s__
ASV019170	k__Bacteria	p__Cyanobacteria	c__Cyanobacteriia	o__Chloroplast	f__	g__	s__
ASV019266	k__Bacteria	p__Cyanobacteria	c__Cyanobacteriia	o__Chloroplast	f__	g__	s__
ASV019269	k__Bacteria	p__Cyanobacteria	c__Cyanobacteriia	o__Chloroplast	f__Cyclotella sp. L04_2	g__	s__
ASV019282	k__Bacteria	p__Cyanobacteria	c__Cyanobacteriia	o__Chloroplast	f__Nannochloropsis oceanica	g__	s__
ASV019287	k__Bacteria	p__Cyanobacteria	c__Cyanobacteriia	o__Chloroplast	f__Mychonastes jurisii	g__	s__
ASV019484	k__Bacteria	p__Cyanobacteria	c__Cyanobacteriia	o__Chloroplast	f__	g__	s__
ASV019506	k__Bacteria	p__Cyanobacteria	c__Cyanobacteriia	o__Chloroplast	f__Hydrodictyon reticulatum	g__	s__
ASV019569	k__Bacteria	p__Cyanobacteria	c__Cyanobacteriia	o__Chloroplast	f__	g__	s__
ASV019572	k__Bacteria	p__Cyanobacteria	c__Cyanobacteriia	o__Chloroplast	f__Planctonema lauterbornii	g__	s__
ASV019594	k__Bacteria	p__Cyanobacteria	c__Cyanobacteriia	o__Chloroplast	f__	g__	s__
ASV019644	k__Bacteria	p__Cyanobacteria	c__Cyanobacteriia	o__Chloroplast	f__Prasiola crispa	g__	s__
ASV020007	k__Bacteria	p__Cyanobacteria	c__Cyanobacteriia	o__Chloroplast	f__	g__	s__
ASV020050	k__Bacteria	p__Cyanobacteria	c__Cyanobacteriia	o__Chloroplast	f__Castanea mollissima (Chinese chestnut)	g__	s__
ASV020083	k__Bacteria	p__Cyanobacteria	c__Cyanobacteriia	o__Chloroplast	f__	g__	s__
ASV020085	k__Bacteria	p__Cyanobacteria	c__Cyanobacteriia	o__Chloroplast	f__	g__	s__
ASV020148	k__Bacteria	p__Cyanobacteria	c__Cyanobacteriia	o__Chloroplast	f__	g__	s__
ASV020275	k__Bacteria	p__Cyanobacteria	c__Cyanobacteriia	o__Chloroplast	f__Coccomyxa viridis	g__	s__
ASV020370	k__Bacteria	p__Cyanobacteria	c__Cyanobacteriia	o__Chloroplast	f__	g__	s__
ASV020431	k__Bacteria	p__Cyanobacteria	c__Cyanobacteriia	o__Chloroplast	f__	g__	s__
ASV020597	k__Bacteria	p__Cyanobacteria	c__Cyanobacteriia	o__Chloroplast	f__Elliptochloris bilobata	g__	s__
ASV020629	k__Bacteria	p__Cyanobacteria	c__Cyanobacteriia	o__Chloroplast	f__Nicotiana tabacum (common tobacco)	g__	s__
ASV020639	k__Bacteria	p__Cyanobacteria	c__Cyanobacteriia	o__Chloroplast	f__Castanea mollissima (Chinese chestnut)	g__	s__
ASV020717	k__Bacteria	p__Cyanobacteria	c__Cyanobacteriia	o__Chloroplast	f__	g__	s__
ASV020776	k__Bacteria	p__Cyanobacteria	c__Cyanobacteriia	o__Chloroplast	f__Edaphochlorella mirabilis	g__	s__
ASV020901	k__Bacteria	p__Cyanobacteria	c__Cyanobacteriia	o__Chloroplast	f__Chlorella sorokiniana	g__	s__
ASV020950	k__Bacteria	p__Cyanobacteria	c__Cyanobacteriia	o__Chloroplast	f__Cyclotella sp. L04_2	g__	s__
ASV021049	k__Bacteria	p__Cyanobacteria	c__Cyanobacteriia	o__Chloroplast	f__Castanea mollissima (Chinese chestnut)	g__	s__
ASV021091	k__Bacteria	p__Cyanobacteria	c__Cyanobacteriia	o__Chloroplast	f__	g__	s__
ASV021092	k__Bacteria	p__Cyanobacteria	c__Cyanobacteriia	o__Chloroplast	f__Folsomia candida	g__	s__
ASV021127	k__Bacteria	p__Cyanobacteria	c__Cyanobacteriia	o__Chloroplast	f__	g__	s__
ASV021156	k__Bacteria	p__Cyanobacteria	c__Cyanobacteriia	o__Chloroplast	f__Castanea mollissima (Chinese chestnut)	g__	s__
ASV021164	k__Bacteria	p__Cyanobacteria	c__Cyanobacteriia	o__Chloroplast	f__Chlorella sp. CC-Bw-9	g__	s__
ASV021172	k__Bacteria	p__Cyanobacteria	c__Cyanobacteriia	o__Chloroplast	f__	g__	s__
ASV021348	k__Bacteria	p__Cyanobacteria	c__Cyanobacteriia	o__Chloroplast	f__	g__	s__
ASV021370	k__Bacteria	p__Cyanobacteria	c__Cyanobacteriia	o__Chloroplast	f__Coccomyxa simplex	g__	s__
ASV021454	k__Bacteria	p__Cyanobacteria	c__Cyanobacteriia	o__Chloroplast	f__Hydra vulgaris	g__	s__
ASV021847	k__Bacteria	p__Cyanobacteria	c__Cyanobacteriia	o__Chloroplast	f__	g__	s__
ASV022121	k__Bacteria	p__Cyanobacteria	c__Cyanobacteriia	o__Chloroplast	f__Coccomyxa viridis	g__	s__
ASV022508	k__Bacteria	p__Cyanobacteria	c__Cyanobacteriia	o__Chloroplast	f__Chlorosarcina brevispinosa	g__	s__
ASV022600	k__Bacteria	p__Cyanobacteria	c__Cyanobacteriia	o__Chloroplast	f__Chloromonas perforata	g__	s__
ASV022673	k__Bacteria	p__Cyanobacteria	c__Cyanobacteriia	o__Chloroplast	f__	g__	s__
ASV022745	k__Bacteria	p__Cyanobacteria	c__Cyanobacteriia	o__Chloroplast	f__	g__	s__
ASV022946	k__Bacteria	p__Cyanobacteria	c__Cyanobacteriia	o__Chloroplast	f__Vaccinium macrocarpon	g__	s__
ASV023139	k__Bacteria	p__Cyanobacteria	c__Cyanobacteriia	o__Chloroplast	f__Morus indica	g__	s__
ASV023148	k__Bacteria	p__Cyanobacteria	c__Cyanobacteriia	o__Chloroplast	f__	g__	s__
ASV023169	k__Bacteria	p__Cyanobacteria	c__Cyanobacteriia	o__Chloroplast	f__	g__	s__
ASV023170	k__Bacteria	p__Cyanobacteria	c__Cyanobacteriia	o__Chloroplast	f__Bracteacoccus minor	g__	s__
ASV023222	k__Bacteria	p__Cyanobacteria	c__Cyanobacteriia	o__Chloroplast	f__	g__	s__
ASV023236	k__Bacteria	p__Cyanobacteria	c__Cyanobacteriia	o__Chloroplast	f__Marchantia paleacea	g__	s__
ASV023484	k__Bacteria	p__Cyanobacteria	c__Cyanobacteriia	o__Chloroplast	f__	g__	s__
ASV023572	k__Bacteria	p__Cyanobacteria	c__Cyanobacteriia	o__Chloroplast	f__Morus indica	g__	s__
ASV023795	k__Bacteria	p__Cyanobacteria	c__Cyanobacteriia	o__Chloroplast	f__Symbiochloris handae	g__	s__
ASV023801	k__Bacteria	p__Cyanobacteria	c__Cyanobacteriia	o__Chloroplast	f__	g__	s__
ASV023912	k__Bacteria	p__Cyanobacteria	c__Cyanobacteriia	o__Chloroplast	f__Hydra vulgaris	g__	s__
ASV024023	k__Bacteria	p__Cyanobacteria	c__Cyanobacteriia	o__Chloroplast	f__Morus indica	g__	s__
ASV024242	k__Bacteria	p__Cyanobacteria	c__Cyanobacteriia	o__Chloroplast	f__Cyclotella sp. L04_2	g__	s__
ASV024263	k__Bacteria	p__Cyanobacteria	c__Cyanobacteriia	o__Chloroplast	f__	g__	s__
ASV024282	k__Bacteria	p__Cyanobacteria	c__Cyanobacteriia	o__Chloroplast	f__	g__	s__
ASV024360	k__Bacteria	p__Cyanobacteria	c__Cyanobacteriia	o__Chloroplast	f__Elliptochloris bilobata	g__	s__
ASV024387	k__Bacteria	p__Cyanobacteria	c__Cyanobacteriia	o__Chloroplast	f__Vaccinium macrocarpon	g__	s__
ASV024389	k__Bacteria	p__Cyanobacteria	c__Cyanobacteriia	o__Chloroplast	f__	g__	s__
ASV024426	k__Bacteria	p__Cyanobacteria	c__Cyanobacteriia	o__Chloroplast	f__	g__	s__
ASV024449	k__Bacteria	p__Cyanobacteria	c__Cyanobacteriia	o__Chloroplast	f__Hydra vulgaris	g__	s__
ASV024536	k__Bacteria	p__Cyanobacteria	c__Cyanobacteriia	o__Chloroplast	f__Chromochloris zofingiensis	g__	s__
ASV024730	k__Bacteria	p__Cyanobacteria	c__Cyanobacteriia	o__Chloroplast	f__Heveochlorella hainangensis	g__	s__
ASV025075	k__Bacteria	p__Cyanobacteria	c__Cyanobacteriia	o__Chloroplast	f__	g__	s__
ASV025085	k__Bacteria	p__Cyanobacteria	c__Cyanobacteriia	o__Chloroplast	f__Hydra vulgaris	g__	s__
ASV025094	k__Bacteria	p__Cyanobacteria	c__Cyanobacteriia	o__Chloroplast	f__Picea glauca (white spruce)	g__	s__
ASV025153	k__Bacteria	p__Cyanobacteria	c__Cyanobacteriia	o__Chloroplast	f__	g__	s__
ASV025231	k__Bacteria	p__Cyanobacteria	c__Cyanobacteriia	o__Chloroplast	f__Castanea mollissima (Chinese chestnut)	g__	s__
ASV025379	k__Bacteria	p__Cyanobacteria	c__Cyanobacteriia	o__Chloroplast	f__	g__	s__
ASV025609	k__Bacteria	p__Cyanobacteria	c__Cyanobacteriia	o__Chloroplast	f__Picea glauca (white spruce)	g__	s__
ASV025624	k__Bacteria	p__Cyanobacteria	c__Cyanobacteriia	o__Chloroplast	f__Morus indica	g__	s__
ASV025813	k__Bacteria	p__Cyanobacteria	c__Cyanobacteriia	o__Chloroplast	f__	g__	s__
ASV026021	k__Bacteria	p__Cyanobacteria	c__Cyanobacteriia	o__Chloroplast	f__Morus indica	g__	s__
ASV026188	k__Bacteria	p__Cyanobacteria	c__Cyanobacteriia	o__Chloroplast	f__Hydra vulgaris	g__	s__
ASV026498	k__Bacteria	p__Cyanobacteria	c__Cyanobacteriia	o__Chloroplast	f__Picea glauca (white spruce)	g__	s__
ASV026521	k__Bacteria	p__Cyanobacteria	c__Cyanobacteriia	o__Chloroplast	f__	g__	s__
ASV026525	k__Bacteria	p__Cyanobacteria	c__Cyanobacteriia	o__Chloroplast	f__Coccomyxa simplex	g__	s__
ASV026534	k__Bacteria	p__Cyanobacteria	c__Cyanobacteriia	o__Chloroplast	f__Coccomyxa simplex	g__	s__
ASV026653	k__Bacteria	p__Cyanobacteria	c__Cyanobacteriia	o__Chloroplast	f__Hydra vulgaris	g__	s__
ASV026836	k__Bacteria	p__Cyanobacteria	c__Cyanobacteriia	o__Chloroplast	f__Castanea mollissima (Chinese chestnut)	g__	s__
ASV027106	k__Bacteria	p__Cyanobacteria	c__Cyanobacteriia	o__Chloroplast	f__Coccomyxa viridis	g__	s__
ASV027132	k__Bacteria	p__Cyanobacteria	c__Cyanobacteriia	o__Chloroplast	f__Morus indica	g__	s__
ASV027332	k__Bacteria	p__Cyanobacteria	c__Cyanobacteriia	o__Chloroplast	f__Elliptochloris bilobata	g__	s__
ASV027404	k__Bacteria	p__Cyanobacteria	c__Cyanobacteriia	o__Chloroplast	f__	g__	s__
ASV027476	k__Bacteria	p__Cyanobacteria	c__Cyanobacteriia	o__Chloroplast	f__Monoraphidium neglectum	g__	s__
ASV027557	k__Bacteria	p__Cyanobacteria	c__Cyanobacteriia	o__Chloroplast	f__Morus indica	g__	s__
ASV027662	k__Bacteria	p__Cyanobacteria	c__Cyanobacteriia	o__Chloroplast	f__	g__	s__
ASV027759	k__Bacteria	p__Cyanobacteria	c__Cyanobacteriia	o__Chloroplast	f__Hydra vulgaris	g__	s__
ASV027792	k__Bacteria	p__Cyanobacteria	c__Cyanobacteriia	o__Chloroplast	f__Hydra vulgaris	g__	s__
ASV027796	k__Bacteria	p__Cyanobacteria	c__Cyanobacteriia	o__Chloroplast	f__	g__	s__
ASV027816	k__Bacteria	p__Cyanobacteria	c__Cyanobacteriia	o__Chloroplast	f__	g__	s__
ASV028004	k__Bacteria	p__Cyanobacteria	c__Cyanobacteriia	o__Chloroplast	f__Monoraphidium neglectum	g__	s__
ASV028120	k__Bacteria	p__Cyanobacteria	c__Cyanobacteriia	o__Chloroplast	f__Castanea mollissima (Chinese chestnut)	g__	s__
ASV028121	k__Bacteria	p__Cyanobacteria	c__Cyanobacteriia	o__Chloroplast	f__Morus indica	g__	s__
ASV028188	k__Bacteria	p__Cyanobacteria	c__Cyanobacteriia	o__Chloroplast	f__	g__	s__
ASV028276	k__Bacteria	p__Cyanobacteria	c__Cyanobacteriia	o__Chloroplast	f__Elliptochloris bilobata	g__	s__
ASV028280	k__Bacteria	p__Cyanobacteria	c__Cyanobacteriia	o__Chloroplast	f__	g__	s__
ASV028362	k__Bacteria	p__Cyanobacteria	c__Cyanobacteriia	o__Chloroplast	f__Nicotiana tabacum (common tobacco)	g__	s__
ASV028443	k__Bacteria	p__Cyanobacteria	c__Cyanobacteriia	o__Chloroplast	f__	g__	s__
ASV028475	k__Bacteria	p__Cyanobacteria	c__Cyanobacteriia	o__Chloroplast	f__Castanea mollissima (Chinese chestnut)	g__	s__
ASV028515	k__Bacteria	p__Cyanobacteria	c__Cyanobacteriia	o__Chloroplast	f__Morus indica	g__	s__
ASV028553	k__Bacteria	p__Cyanobacteria	c__Cyanobacteriia	o__Chloroplast	f__	g__	s__
ASV028559	k__Bacteria	p__Cyanobacteria	c__Cyanobacteriia	o__Chloroplast	f__Morus indica	g__	s__
ASV028764	k__Bacteria	p__Cyanobacteria	c__Cyanobacteriia	o__Chloroplast	f__Symbiochloris handae	g__	s__
ASV028964	k__Bacteria	p__Cyanobacteria	c__Cyanobacteriia	o__Chloroplast	f__Symbiochloris handae	g__	s__
ASV029044	k__Bacteria	p__Cyanobacteria	c__Cyanobacteriia	o__Chloroplast	f__Hydra vulgaris	g__	s__
ASV029080	k__Bacteria	p__Cyanobacteria	c__Cyanobacteriia	o__Chloroplast	f__Castanea mollissima (Chinese chestnut)	g__	s__
ASV029124	k__Bacteria	p__Cyanobacteria	c__Cyanobacteriia	o__Chloroplast	f__Elliptochloris bilobata	g__	s__
ASV029143	k__Bacteria	p__Cyanobacteria	c__Cyanobacteriia	o__Chloroplast	f__	g__	s__
ASV029375	k__Bacteria	p__Cyanobacteria	c__Cyanobacteriia	o__Chloroplast	f__Nicotiana tabacum (common tobacco)	g__	s__
ASV029456	k__Bacteria	p__Cyanobacteria	c__Cyanobacteriia	o__Chloroplast	f__Morus indica	g__	s__
ASV029460	k__Bacteria	p__Cyanobacteria	c__Cyanobacteriia	o__Chloroplast	f__Morus indica	g__	s__
ASV029591	k__Bacteria	p__Cyanobacteria	c__Cyanobacteriia	o__Chloroplast	f__Ochromonas sp. CCMP1393	g__	s__
ASV029679	k__Bacteria	p__Cyanobacteria	c__Cyanobacteriia	o__Chloroplast	f__Symbiochloris handae	g__	s__
ASV029832	k__Bacteria	p__Cyanobacteria	c__Cyanobacteriia	o__Chloroplast	f__	g__	s__
ASV029837	k__Bacteria	p__Cyanobacteria	c__Cyanobacteriia	o__Chloroplast	f__	g__	s__
ASV029944	k__Bacteria	p__Cyanobacteria	c__Cyanobacteriia	o__Chloroplast	f__	g__	s__
ASV029952	k__Bacteria	p__Cyanobacteria	c__Cyanobacteriia	o__Chloroplast	f__	g__	s__
ASV030076	k__Bacteria	p__Cyanobacteria	c__Cyanobacteriia	o__Chloroplast	f__	g__	s__
ASV030176	k__Bacteria	p__Cyanobacteria	c__Cyanobacteriia	o__Chloroplast	f__Sanionia uncinata	g__	s__
ASV030478	k__Bacteria	p__Cyanobacteria	c__Cyanobacteriia	o__Chloroplast	f__Picea glauca (white spruce)	g__	s__
ASV030483	k__Bacteria	p__Cyanobacteria	c__Cyanobacteriia	o__Chloroplast	f__	g__	s__
ASV030556	k__Bacteria	p__Cyanobacteria	c__Cyanobacteriia	o__Chloroplast	f__Castanea mollissima (Chinese chestnut)	g__	s__
ASV030677	k__Bacteria	p__Cyanobacteria	c__Cyanobacteriia	o__Chloroplast	f__	g__	s__
ASV030821	k__Bacteria	p__Cyanobacteria	c__Cyanobacteriia	o__Chloroplast	f__	g__	s__
ASV030883	k__Bacteria	p__Cyanobacteria	c__Cyanobacteriia	o__Chloroplast	f__Morus indica	g__	s__
ASV031004	k__Bacteria	p__Cyanobacteria	c__Cyanobacteriia	o__Chloroplast	f__Vaccinium macrocarpon	g__	s__
ASV031035	k__Bacteria	p__Cyanobacteria	c__Cyanobacteriia	o__Chloroplast	f__Myrmecia israeliensis	g__	s__
ASV031400	k__Bacteria	p__Cyanobacteria	c__Cyanobacteriia	o__Chloroplast	f__	g__	s__
ASV031407	k__Bacteria	p__Cyanobacteria	c__Cyanobacteriia	o__Chloroplast	f__Sanionia uncinata	g__	s__
ASV031446	k__Bacteria	p__Cyanobacteria	c__Cyanobacteriia	o__Chloroplast	f__Nicotiana tabacum (common tobacco)	g__	s__
ASV031467	k__Bacteria	p__Cyanobacteria	c__Cyanobacteriia	o__Chloroplast	f__Morus indica	g__	s__
ASV031583	k__Bacteria	p__Cyanobacteria	c__Cyanobacteriia	o__Chloroplast	f__Elliptochloris bilobata	g__	s__
ASV031818	k__Bacteria	p__Cyanobacteria	c__Cyanobacteriia	o__Chloroplast	f__	g__	s__
ASV031895	k__Bacteria	p__Cyanobacteria	c__Cyanobacteriia	o__Chloroplast	f__Morus indica	g__	s__
ASV031957	k__Bacteria	p__Cyanobacteria	c__Cyanobacteriia	o__Chloroplast	f__Chlamydomonas eustigma	g__	s__
ASV032221	k__Bacteria	p__Cyanobacteria	c__Cyanobacteriia	o__Chloroplast	f__Bryum argenteum var. argenteum	g__	s__
ASV032321	k__Bacteria	p__Cyanobacteria	c__Cyanobacteriia	o__Chloroplast	f__Auxenochlorella protothecoides	g__	s__
ASV032435	k__Bacteria	p__Cyanobacteria	c__Cyanobacteriia	o__Chloroplast	f__	g__	s__
ASV032830	k__Bacteria	p__Cyanobacteria	c__Cyanobacteriia	o__Chloroplast	f__Sanionia uncinata	g__	s__
ASV032832	k__Bacteria	p__Cyanobacteria	c__Cyanobacteriia	o__Chloroplast	f__	g__	s__
ASV033245	k__Bacteria	p__Cyanobacteria	c__Cyanobacteriia	o__Chloroplast	f__	g__	s__
ASV033272	k__Bacteria	p__Cyanobacteria	c__Cyanobacteriia	o__Chloroplast	f__Picea glauca (white spruce)	g__	s__
ASV033332	k__Bacteria	p__Cyanobacteria	c__Cyanobacteriia	o__Chloroplast	f__Picea glauca (white spruce)	g__	s__
ASV033474	k__Bacteria	p__Cyanobacteria	c__Cyanobacteriia	o__Chloroplast	f__	g__	s__
ASV033577	k__Bacteria	p__Cyanobacteria	c__Cyanobacteriia	o__Chloroplast	f__	g__	s__
ASV033747	k__Bacteria	p__Cyanobacteria	c__Cyanobacteriia	o__Chloroplast	f__Nicotiana tabacum (common tobacco)	g__	s__
ASV034061	k__Bacteria	p__Cyanobacteria	c__Cyanobacteriia	o__Chloroplast	f__	g__	s__
ASV034233	k__Bacteria	p__Cyanobacteria	c__Cyanobacteriia	o__Chloroplast	f__	g__	s__
ASV034234	k__Bacteria	p__Cyanobacteria	c__Cyanobacteriia	o__Chloroplast	f__Morus indica	g__	s__
ASV034448	k__Bacteria	p__Cyanobacteria	c__Cyanobacteriia	o__Chloroplast	f__Elliptochloris bilobata	g__	s__
ASV034502	k__Bacteria	p__Cyanobacteria	c__Cyanobacteriia	o__Chloroplast	f__Calycanthus floridus var. glaucus	g__	s__
ASV034634	k__Bacteria	p__Cyanobacteria	c__Cyanobacteriia	o__Chloroplast	f__Castanea mollissima (Chinese chestnut)	g__	s__
ASV034635	k__Bacteria	p__Cyanobacteria	c__Cyanobacteriia	o__Chloroplast	f__	g__	s__
ASV034685	k__Bacteria	p__Cyanobacteria	c__Cyanobacteriia	o__Chloroplast	f__	g__	s__
ASV034853	k__Bacteria	p__Cyanobacteria	c__Cyanobacteriia	o__Chloroplast	f__Chloromonas radiata	g__	s__
ASV034918	k__Bacteria	p__Cyanobacteria	c__Cyanobacteriia	o__Chloroplast	f__Morus indica	g__	s__
ASV034957	k__Bacteria	p__Cyanobacteria	c__Cyanobacteriia	o__Chloroplast	f__Morus indica	g__	s__
ASV035023	k__Bacteria	p__Cyanobacteria	c__Cyanobacteriia	o__Chloroplast	f__Castanea mollissima (Chinese chestnut)	g__	s__
ASV035279	k__Bacteria	p__Cyanobacteria	c__Cyanobacteriia	o__Chloroplast	f__Sanionia uncinata	g__	s__
ASV035423	k__Bacteria	p__Cyanobacteria	c__Cyanobacteriia	o__Chloroplast	f__Coccomyxa simplex	g__	s__
ASV035564	k__Bacteria	p__Cyanobacteria	c__Cyanobacteriia	o__Chloroplast	f__	g__	s__
ASV035654	k__Bacteria	p__Cyanobacteria	c__Cyanobacteriia	o__Chloroplast	f__Dryopteris fragrans	g__	s__
ASV035719	k__Bacteria	p__Cyanobacteria	c__Cyanobacteriia	o__Chloroplast	f__Nicotiana tabacum (common tobacco)	g__	s__
ASV035724	k__Bacteria	p__Cyanobacteria	c__Cyanobacteriia	o__Chloroplast	f__	g__	s__
ASV035745	k__Bacteria	p__Cyanobacteria	c__Cyanobacteriia	o__Chloroplast	f__Coccomyxa sp. SUA001	g__	s__
ASV035833	k__Bacteria	p__Cyanobacteria	c__Cyanobacteriia	o__Chloroplast	f__Castanea mollissima (Chinese chestnut)	g__	s__
ASV035882	k__Bacteria	p__Cyanobacteria	c__Cyanobacteriia	o__Chloroplast	f__	g__	s__
ASV036020	k__Bacteria	p__Cyanobacteria	c__Cyanobacteriia	o__Chloroplast	f__	g__	s__
ASV036032	k__Bacteria	p__Cyanobacteria	c__Cyanobacteriia	o__Chloroplast	f__Castanea mollissima (Chinese chestnut)	g__	s__
ASV036293	k__Bacteria	p__Cyanobacteria	c__Cyanobacteriia	o__Chloroplast	f__	g__	s__
ASV036509	k__Bacteria	p__Cyanobacteria	c__Cyanobacteriia	o__Chloroplast	f__	g__	s__
ASV036636	k__Bacteria	p__Cyanobacteria	c__Cyanobacteriia	o__Chloroplast	f__	g__	s__
ASV036778	k__Bacteria	p__Cyanobacteria	c__Cyanobacteriia	o__Chloroplast	f__Morus indica	g__	s__
ASV037046	k__Bacteria	p__Cyanobacteria	c__Cyanobacteriia	o__Chloroplast	f__Elliptochloris bilobata	g__	s__
ASV037076	k__Bacteria	p__Cyanobacteria	c__Cyanobacteriia	o__Chloroplast	f__Picea glauca (white spruce)	g__	s__
ASV037085	k__Bacteria	p__Cyanobacteria	c__Cyanobacteriia	o__Chloroplast	f__Picea glauca (white spruce)	g__	s__
ASV037200	k__Bacteria	p__Cyanobacteria	c__Cyanobacteriia	o__Chloroplast	f__Morus indica	g__	s__
ASV037337	k__Bacteria	p__Cyanobacteria	c__Cyanobacteriia	o__Chloroplast	f__Gossypium arboreum	g__	s__
ASV037569	k__Bacteria	p__Cyanobacteria	c__Cyanobacteriia	o__Chloroplast	f__Morus indica	g__	s__
ASV037574	k__Bacteria	p__Cyanobacteria	c__Cyanobacteriia	o__Chloroplast	f__Hydra vulgaris	g__	s__
ASV037593	k__Bacteria	p__Cyanobacteria	c__Cyanobacteriia	o__Chloroplast	f__Castanea mollissima (Chinese chestnut)	g__	s__
ASV037702	k__Bacteria	p__Cyanobacteria	c__Cyanobacteriia	o__Chloroplast	f__Elliptochloris bilobata	g__	s__
ASV037887	k__Bacteria	p__Cyanobacteria	c__Cyanobacteriia	o__Chloroplast	f__Gossypium arboreum	g__	s__
ASV037948	k__Bacteria	p__Cyanobacteria	c__Cyanobacteriia	o__Chloroplast	f__Hydra vulgaris	g__	s__
ASV037965	k__Bacteria	p__Cyanobacteria	c__Cyanobacteriia	o__Chloroplast	f__Dryopteris fragrans	g__	s__
ASV038049	k__Bacteria	p__Cyanobacteria	c__Cyanobacteriia	o__Chloroplast	f__Picea glauca (white spruce)	g__	s__
ASV038176	k__Bacteria	p__Cyanobacteria	c__Cyanobacteriia	o__Chloroplast	f__Closterium baillyanum	g__	s__
ASV038191	k__Bacteria	p__Cyanobacteria	c__Cyanobacteriia	o__Chloroplast	f__	g__	s__
ASV038279	k__Bacteria	p__Cyanobacteria	c__Cyanobacteriia	o__Chloroplast	f__Sphagnum angustifolium	g__	s__
ASV038319	k__Bacteria	p__Cyanobacteria	c__Cyanobacteriia	o__Chloroplast	f__	g__	s__
ASV038654	k__Bacteria	p__Cyanobacteria	c__Cyanobacteriia	o__Chloroplast	f__Coccomyxa viridis	g__	s__
ASV038741	k__Bacteria	p__Cyanobacteria	c__Cyanobacteriia	o__Chloroplast	f__	g__	s__
ASV038804	k__Bacteria	p__Cyanobacteria	c__Cyanobacteriia	o__Chloroplast	f__Nicotiana tabacum (common tobacco)	g__	s__
ASV039192	k__Bacteria	p__Cyanobacteria	c__Cyanobacteriia	o__Chloroplast	f__Nicotiana tabacum (common tobacco)	g__	s__
ASV039205	k__Bacteria	p__Cyanobacteria	c__Cyanobacteriia	o__Chloroplast	f__Symbiochloris handae	g__	s__
ASV039206	k__Bacteria	p__Cyanobacteria	c__Cyanobacteriia	o__Chloroplast	f__Castanea mollissima (Chinese chestnut)	g__	s__
ASV039345	k__Bacteria	p__Cyanobacteria	c__Cyanobacteriia	o__Chloroplast	f__Morus indica	g__	s__
ASV039478	k__Bacteria	p__Cyanobacteria	c__Cyanobacteriia	o__Chloroplast	f__Coccomyxa simplex	g__	s__
ASV039615	k__Bacteria	p__Cyanobacteria	c__Cyanobacteriia	o__Chloroplast	f__Hydra vulgaris	g__	s__
ASV039689	k__Bacteria	p__Cyanobacteria	c__Cyanobacteriia	o__Chloroplast	f__Morus indica	g__	s__
ASV039709	k__Bacteria	p__Cyanobacteria	c__Cyanobacteriia	o__Chloroplast	f__Nicotiana tabacum (common tobacco)	g__	s__
ASV039840	k__Bacteria	p__Cyanobacteria	c__Cyanobacteriia	o__Chloroplast	f__Nicotiana tabacum (common tobacco)	g__	s__
ASV039918	k__Bacteria	p__Cyanobacteria	c__Cyanobacteriia	o__Chloroplast	f__	g__	s__
ASV040299	k__Bacteria	p__Cyanobacteria	c__Cyanobacteriia	o__Chloroplast	f__	g__	s__
ASV040326	k__Bacteria	p__Cyanobacteria	c__Cyanobacteriia	o__Chloroplast	f__	g__	s__
ASV040352	k__Bacteria	p__Cyanobacteria	c__Cyanobacteriia	o__Chloroplast	f__	g__	s__
ASV040396	k__Bacteria	p__Cyanobacteria	c__Cyanobacteriia	o__Chloroplast	f__	g__	s__
ASV040572	k__Bacteria	p__Cyanobacteria	c__Cyanobacteriia	o__Chloroplast	f__Betula pendula (European white birch)	g__	s__
ASV040653	k__Bacteria	p__Cyanobacteria	c__Cyanobacteriia	o__Chloroplast	f__	g__	s__
ASV040729	k__Bacteria	p__Cyanobacteria	c__Cyanobacteriia	o__Chloroplast	f__Athetis lepigone	g__	s__
ASV040944	k__Bacteria	p__Cyanobacteria	c__Cyanobacteriia	o__Chloroplast	f__	g__	s__
ASV041641	k__Bacteria	p__Cyanobacteria	c__Cyanobacteriia	o__Chloroplast	f__	g__	s__
ASV042164	k__Bacteria	p__Cyanobacteria	c__Cyanobacteriia	o__Chloroplast	f__Morus indica	g__	s__
ASV042170	k__Bacteria	p__Cyanobacteria	c__Cyanobacteriia	o__Chloroplast	f__Chloromonas radiata	g__	s__
ASV042400	k__Bacteria	p__Cyanobacteria	c__Cyanobacteriia	o__Chloroplast	f__Hydra vulgaris	g__	s__
ASV042405	k__Bacteria	p__Cyanobacteria	c__Cyanobacteriia	o__Chloroplast	f__Morus indica	g__	s__
ASV042516	k__Bacteria	p__Cyanobacteria	c__Cyanobacteriia	o__Chloroplast	f__Morus indica	g__	s__
ASV042601	k__Bacteria	p__Cyanobacteria	c__Cyanobacteriia	o__Chloroplast	f__Betula pendula (European white birch)	g__	s__
ASV042998	k__Bacteria	p__Cyanobacteria	c__Cyanobacteriia	o__Chloroplast	f__Nicotiana tabacum (common tobacco)	g__	s__
ASV043094	k__Bacteria	p__Cyanobacteria	c__Cyanobacteriia	o__Chloroplast	f__Klebsormidium nitens	g__	s__
ASV043151	k__Bacteria	p__Cyanobacteria	c__Cyanobacteriia	o__Chloroplast	f__Elliptochloris bilobata	g__	s__
ASV043468	k__Bacteria	p__Cyanobacteria	c__Cyanobacteriia	o__Chloroplast	f__Morus indica	g__	s__
ASV043529	k__Bacteria	p__Cyanobacteria	c__Cyanobacteriia	o__Chloroplast	f__Morus indica	g__	s__
ASV043695	k__Bacteria	p__Cyanobacteria	c__Cyanobacteriia	o__Chloroplast	f__Nicotiana tabacum (common tobacco)	g__	s__
ASV043799	k__Bacteria	p__Cyanobacteria	c__Cyanobacteriia	o__Chloroplast	f__Nicotiana tabacum (common tobacco)	g__	s__
ASV043825	k__Bacteria	p__Cyanobacteria	c__Cyanobacteriia	o__Chloroplast	f__Coccomyxa simplex	g__	s__
ASV043876	k__Bacteria	p__Cyanobacteria	c__Cyanobacteriia	o__Chloroplast	f__Morus indica	g__	s__
ASV043959	k__Bacteria	p__Cyanobacteria	c__Cyanobacteriia	o__Chloroplast	f__Picea glauca (white spruce)	g__	s__
ASV044011	k__Bacteria	p__Cyanobacteria	c__Cyanobacteriia	o__Chloroplast	f__Betula pendula (European white birch)	g__	s__
ASV044164	k__Bacteria	p__Cyanobacteria	c__Cyanobacteriia	o__Chloroplast	f__Nicotiana tabacum (common tobacco)	g__	s__
ASV044175	k__Bacteria	p__Cyanobacteria	c__Cyanobacteriia	o__Chloroplast	f__	g__	s__
ASV044226	k__Bacteria	p__Cyanobacteria	c__Cyanobacteriia	o__Chloroplast	f__Morus indica	g__	s__
ASV044274	k__Bacteria	p__Cyanobacteria	c__Cyanobacteriia	o__Chloroplast	f__Nicotiana tabacum (common tobacco)	g__	s__
ASV044284	k__Bacteria	p__Cyanobacteria	c__Cyanobacteriia	o__Chloroplast	f__	g__	s__
ASV044323	k__Bacteria	p__Cyanobacteria	c__Cyanobacteriia	o__Chloroplast	f__Morus indica	g__	s__
ASV044351	k__Bacteria	p__Cyanobacteria	c__Cyanobacteriia	o__Chloroplast	f__Vaccinium macrocarpon	g__	s__
ASV044568	k__Bacteria	p__Cyanobacteria	c__Cyanobacteriia	o__Chloroplast	f__Morus indica	g__	s__
ASV044783	k__Bacteria	p__Cyanobacteria	c__Cyanobacteriia	o__Chloroplast	f__	g__	s__
ASV044796	k__Bacteria	p__Cyanobacteria	c__Cyanobacteriia	o__Chloroplast	f__Morus indica	g__	s__
ASV044806	k__Bacteria	p__Cyanobacteria	c__Cyanobacteriia	o__Chloroplast	f__Nicotiana tabacum (common tobacco)	g__	s__
ASV045344	k__Bacteria	p__Cyanobacteria	c__Cyanobacteriia	o__Chloroplast	f__Sanionia uncinata	g__	s__
ASV045642	k__Bacteria	p__Cyanobacteria	c__Cyanobacteriia	o__Chloroplast	f__Morus indica	g__	s__
ASV045844	k__Bacteria	p__Cyanobacteria	c__Cyanobacteriia	o__Chloroplast	f__	g__	s__
ASV045944	k__Bacteria	p__Cyanobacteria	c__Cyanobacteriia	o__Chloroplast	f__Myrmecia israeliensis	g__	s__
ASV045949	k__Bacteria	p__Cyanobacteria	c__Cyanobacteriia	o__Chloroplast	f__Picea glauca (white spruce)	g__	s__
ASV046370	k__Bacteria	p__Cyanobacteria	c__Cyanobacteriia	o__Chloroplast	f__Symbiochloris handae	g__	s__
ASV046607	k__Bacteria	p__Cyanobacteria	c__Cyanobacteriia	o__Chloroplast	f__	g__	s__
ASV046687	k__Bacteria	p__Cyanobacteria	c__Cyanobacteriia	o__Chloroplast	f__Nicotiana tabacum (common tobacco)	g__	s__
ASV046720	k__Bacteria	p__Cyanobacteria	c__Cyanobacteriia	o__Chloroplast	f__	g__	s__
ASV046901	k__Bacteria	p__Cyanobacteria	c__Cyanobacteriia	o__Chloroplast	f__Elliptochloris bilobata	g__	s__
ASV047048	k__Bacteria	p__Cyanobacteria	c__Cyanobacteriia	o__Chloroplast	f__Vaccinium macrocarpon	g__	s__
ASV047067	k__Bacteria	p__Cyanobacteria	c__Cyanobacteriia	o__Chloroplast	f__Morus indica	g__	s__
ASV047460	k__Bacteria	p__Cyanobacteria	c__Cyanobacteriia	o__Chloroplast	f__	g__	s__
ASV047463	k__Bacteria	p__Cyanobacteria	c__Cyanobacteriia	o__Chloroplast	f__Calycanthus floridus var. glaucus	g__	s__
ASV047668	k__Bacteria	p__Cyanobacteria	c__Cyanobacteriia	o__Chloroplast	f__Nicotiana tabacum (common tobacco)	g__	s__
ASV048000	k__Bacteria	p__Cyanobacteria	c__Cyanobacteriia	o__Chloroplast	f__Gossypium arboreum	g__	s__
ASV048133	k__Bacteria	p__Cyanobacteria	c__Cyanobacteriia	o__Chloroplast	f__	g__	s__
ASV048552	k__Bacteria	p__Cyanobacteria	c__Cyanobacteriia	o__Chloroplast	f__Dryopteris fragrans	g__	s__
ASV048734	k__Bacteria	p__Cyanobacteria	c__Cyanobacteriia	o__Chloroplast	f__Sorghum bicolor (sorghum)	g__	s__
ASV048764	k__Bacteria	p__Cyanobacteria	c__Cyanobacteriia	o__Chloroplast	f__Picea glauca (white spruce)	g__	s__
ASV048903	k__Bacteria	p__Cyanobacteria	c__Cyanobacteriia	o__Chloroplast	f__Gossypium arboreum	g__	s__
ASV049014	k__Bacteria	p__Cyanobacteria	c__Cyanobacteriia	o__Chloroplast	f__	g__	s__
ASV049106	k__Bacteria	p__Cyanobacteria	c__Cyanobacteriia	o__Chloroplast	f__Hydra vulgaris	g__	s__
ASV049127	k__Bacteria	p__Cyanobacteria	c__Cyanobacteriia	o__Chloroplast	f__	g__	s__
ASV049146	k__Bacteria	p__Cyanobacteria	c__Cyanobacteriia	o__Chloroplast	f__Morus indica	g__	s__
ASV050006	k__Bacteria	p__Cyanobacteria	c__Cyanobacteriia	o__Chloroplast	f__	g__	s__
ASV050192	k__Bacteria	p__Cyanobacteria	c__Cyanobacteriia	o__Chloroplast	f__	g__	s__
ASV050633	k__Bacteria	p__Cyanobacteria	c__Cyanobacteriia	o__Chloroplast	f__Sphagnum angustifolium	g__	s__
ASV050772	k__Bacteria	p__Cyanobacteria	c__Cyanobacteriia	o__Chloroplast	f__Morus indica	g__	s__
ASV051024	k__Bacteria	p__Cyanobacteria	c__Cyanobacteriia	o__Chloroplast	f__Picea glauca (white spruce)	g__	s__
ASV051079	k__Bacteria	p__Cyanobacteria	c__Cyanobacteriia	o__Chloroplast	f__Sanionia uncinata	g__	s__
ASV051488	k__Bacteria	p__Cyanobacteria	c__Cyanobacteriia	o__Chloroplast	f__Morus indica	g__	s__
ASV051578	k__Bacteria	p__Cyanobacteria	c__Cyanobacteriia	o__Chloroplast	f__	g__	s__
ASV051810	k__Bacteria	p__Cyanobacteria	c__Cyanobacteriia	o__Chloroplast	f__Didymosphenia geminata	g__	s__
ASV051879	k__Bacteria	p__Cyanobacteria	c__Cyanobacteriia	o__Chloroplast	f__	g__	s__
ASV051975	k__Bacteria	p__Cyanobacteria	c__Cyanobacteriia	o__Chloroplast	f__	g__	s__
ASV052019	k__Bacteria	p__Cyanobacteria	c__Cyanobacteriia	o__Chloroplast	f__Morus indica	g__	s__
ASV052215	k__Bacteria	p__Cyanobacteria	c__Cyanobacteriia	o__Chloroplast	f__Nicotiana tabacum (common tobacco)	g__	s__
ASV052397	k__Bacteria	p__Cyanobacteria	c__Cyanobacteriia	o__Chloroplast	f__	g__	s__
ASV052420	k__Bacteria	p__Cyanobacteria	c__Cyanobacteriia	o__Chloroplast	f__Symbiochloris handae	g__	s__
ASV052488	k__Bacteria	p__Cyanobacteria	c__Cyanobacteriia	o__Chloroplast	f__Monoraphidium neglectum	g__	s__
ASV052742	k__Bacteria	p__Cyanobacteria	c__Cyanobacteriia	o__Chloroplast	f__Hydra vulgaris	g__	s__
ASV052783	k__Bacteria	p__Cyanobacteria	c__Cyanobacteriia	o__Chloroplast	f__Hydra vulgaris	g__	s__
ASV052786	k__Bacteria	p__Cyanobacteria	c__Cyanobacteriia	o__Chloroplast	f__Morus indica	g__	s__
ASV053085	k__Bacteria	p__Cyanobacteria	c__Cyanobacteriia	o__Chloroplast	f__Coccomyxa viridis	g__	s__
ASV053089	k__Bacteria	p__Cyanobacteria	c__Cyanobacteriia	o__Chloroplast	f__	g__	s__
ASV053100	k__Bacteria	p__Cyanobacteria	c__Cyanobacteriia	o__Chloroplast	f__	g__	s__
ASV053116	k__Bacteria	p__Cyanobacteria	c__Cyanobacteriia	o__Chloroplast	f__Elliptochloris bilobata	g__	s__
ASV053330	k__Bacteria	p__Cyanobacteria	c__Cyanobacteriia	o__Chloroplast	f__	g__	s__
ASV053439	k__Bacteria	p__Cyanobacteria	c__Cyanobacteriia	o__Chloroplast	f__	g__	s__
ASV053462	k__Bacteria	p__Cyanobacteria	c__Cyanobacteriia	o__Chloroplast	f__	g__	s__
ASV053517	k__Bacteria	p__Cyanobacteria	c__Cyanobacteriia	o__Chloroplast	f__Sanionia uncinata	g__	s__
ASV053567	k__Bacteria	p__Cyanobacteria	c__Cyanobacteriia	o__Chloroplast	f__Dryopteris fragrans	g__	s__
ASV053618	k__Bacteria	p__Cyanobacteria	c__Cyanobacteriia	o__Chloroplast	f__Morus indica	g__	s__
ASV053622	k__Bacteria	p__Cyanobacteria	c__Cyanobacteriia	o__Chloroplast	f__Nicotiana tabacum (common tobacco)	g__	s__
ASV053774	k__Bacteria	p__Cyanobacteria	c__Cyanobacteriia	o__Chloroplast	f__Morus indica	g__	s__
ASV053780	k__Bacteria	p__Cyanobacteria	c__Cyanobacteriia	o__Chloroplast	f__Sanionia uncinata	g__	s__
ASV053878	k__Bacteria	p__Cyanobacteria	c__Cyanobacteriia	o__Chloroplast	f__Nicotiana tabacum (common tobacco)	g__	s__
ASV053883	k__Bacteria	p__Cyanobacteria	c__Cyanobacteriia	o__Chloroplast	f__Sphagnum angustifolium	g__	s__
ASV053982	k__Bacteria	p__Cyanobacteria	c__Cyanobacteriia	o__Chloroplast	f__Morus indica	g__	s__
ASV054042	k__Bacteria	p__Cyanobacteria	c__Cyanobacteriia	o__Chloroplast	f__	g__	s__
ASV054214	k__Bacteria	p__Cyanobacteria	c__Cyanobacteriia	o__Chloroplast	f__Morus indica	g__	s__
ASV054323	k__Bacteria	p__Cyanobacteria	c__Cyanobacteriia	o__Chloroplast	f__Picea glauca (white spruce)	g__	s__
ASV054383	k__Bacteria	p__Cyanobacteria	c__Cyanobacteriia	o__Chloroplast	f__Hydra vulgaris	g__	s__
ASV054391	k__Bacteria	p__Cyanobacteria	c__Cyanobacteriia	o__Chloroplast	f__	g__	s__
ASV054715	k__Bacteria	p__Cyanobacteria	c__Cyanobacteriia	o__Chloroplast	f__	g__	s__
ASV054899	k__Bacteria	p__Cyanobacteria	c__Cyanobacteriia	o__Chloroplast	f__Morus indica	g__	s__
ASV055096	k__Bacteria	p__Cyanobacteria	c__Cyanobacteriia	o__Chloroplast	f__	g__	s__
ASV055245	k__Bacteria	p__Cyanobacteria	c__Cyanobacteriia	o__Chloroplast	f__	g__	s__
ASV055269	k__Bacteria	p__Cyanobacteria	c__Cyanobacteriia	o__Chloroplast	f__	g__	s__
ASV055479	k__Bacteria	p__Cyanobacteria	c__Cyanobacteriia	o__Chloroplast	f__	g__	s__
ASV055491	k__Bacteria	p__Cyanobacteria	c__Cyanobacteriia	o__Chloroplast	f__Castanea mollissima (Chinese chestnut)	g__	s__
ASV055509	k__Bacteria	p__Cyanobacteria	c__Cyanobacteriia	o__Chloroplast	f__Nicotiana tabacum (common tobacco)	g__	s__
ASV055658	k__Bacteria	p__Cyanobacteria	c__Cyanobacteriia	o__Chloroplast	f__Coccomyxa viridis	g__	s__
ASV055679	k__Bacteria	p__Cyanobacteria	c__Cyanobacteriia	o__Chloroplast	f__	g__	s__
ASV055863	k__Bacteria	p__Cyanobacteria	c__Cyanobacteriia	o__Chloroplast	f__Betula pendula (European white birch)	g__	s__
ASV055871	k__Bacteria	p__Cyanobacteria	c__Cyanobacteriia	o__Chloroplast	f__Nicotiana tabacum (common tobacco)	g__	s__
ASV055975	k__Bacteria	p__Cyanobacteria	c__Cyanobacteriia	o__Chloroplast	f__	g__	s__
ASV056166	k__Bacteria	p__Cyanobacteria	c__Cyanobacteriia	o__Chloroplast	f__Sanionia uncinata	g__	s__
ASV056186	k__Bacteria	p__Cyanobacteria	c__Cyanobacteriia	o__Chloroplast	f__Amborella trichopoda	g__	s__
ASV056503	k__Bacteria	p__Cyanobacteria	c__Cyanobacteriia	o__Chloroplast	f__Eimeria praecox	g__	s__
ASV056645	k__Bacteria	p__Cyanobacteria	c__Cyanobacteriia	o__Chloroplast	f__Morus indica	g__	s__
ASV056656	k__Bacteria	p__Cyanobacteria	c__Cyanobacteriia	o__Chloroplast	f__	g__	s__
ASV056717	k__Bacteria	p__Cyanobacteria	c__Cyanobacteriia	o__Chloroplast	f__	g__	s__
ASV056759	k__Bacteria	p__Cyanobacteria	c__Cyanobacteriia	o__Chloroplast	f__	g__	s__
ASV057015	k__Bacteria	p__Cyanobacteria	c__Cyanobacteriia	o__Chloroplast	f__	g__	s__
ASV057104	k__Bacteria	p__Cyanobacteria	c__Cyanobacteriia	o__Chloroplast	f__	g__	s__
ASV057154	k__Bacteria	p__Cyanobacteria	c__Cyanobacteriia	o__Chloroplast	f__Hydra vulgaris	g__	s__
ASV057189	k__Bacteria	p__Cyanobacteria	c__Cyanobacteriia	o__Chloroplast	f__	g__	s__
ASV057355	k__Bacteria	p__Cyanobacteria	c__Cyanobacteriia	o__Chloroplast	f__Gossypium arboreum	g__	s__
ASV057438	k__Bacteria	p__Cyanobacteria	c__Cyanobacteriia	o__Chloroplast	f__Picea glauca (white spruce)	g__	s__
ASV057439	k__Bacteria	p__Cyanobacteria	c__Cyanobacteriia	o__Chloroplast	f__	g__	s__
ASV057555	k__Bacteria	p__Cyanobacteria	c__Cyanobacteriia	o__Chloroplast	f__Coccomyxa viridis	g__	s__
ASV057606	k__Bacteria	p__Cyanobacteria	c__Cyanobacteriia	o__Chloroplast	f__Morus indica	g__	s__
ASV057668	k__Bacteria	p__Cyanobacteria	c__Cyanobacteriia	o__Chloroplast	f__	g__	s__
ASV057672	k__Bacteria	p__Cyanobacteria	c__Cyanobacteriia	o__Chloroplast	f__Morus indica	g__	s__
ASV057727	k__Bacteria	p__Cyanobacteria	c__Cyanobacteriia	o__Chloroplast	f__	g__	s__
ASV057812	k__Bacteria	p__Cyanobacteria	c__Cyanobacteriia	o__Chloroplast	f__Nicotiana tabacum (common tobacco)	g__	s__
ASV057837	k__Bacteria	p__Cyanobacteria	c__Cyanobacteriia	o__Chloroplast	f__	g__	s__
ASV058044	k__Bacteria	p__Cyanobacteria	c__Cyanobacteriia	o__Chloroplast	f__Hydra vulgaris	g__	s__
ASV058379	k__Bacteria	p__Cyanobacteria	c__Cyanobacteriia	o__Chloroplast	f__	g__	s__
ASV058408	k__Bacteria	p__Cyanobacteria	c__Cyanobacteriia	o__Chloroplast	f__	g__	s__
ASV058586	k__Bacteria	p__Cyanobacteria	c__Cyanobacteriia	o__Chloroplast	f__Mychonastes jurisii	g__	s__
ASV058663	k__Bacteria	p__Cyanobacteria	c__Cyanobacteriia	o__Chloroplast	f__	g__	s__
ASV058762	k__Bacteria	p__Cyanobacteria	c__Cyanobacteriia	o__Chloroplast	f__Morus indica	g__	s__
ASV059185	k__Bacteria	p__Cyanobacteria	c__Cyanobacteriia	o__Chloroplast	f__Symbiochloris handae	g__	s__
ASV059811	k__Bacteria	p__Cyanobacteria	c__Cyanobacteriia	o__Chloroplast	f__	g__	s__
ASV059823	k__Bacteria	p__Cyanobacteria	c__Cyanobacteriia	o__Chloroplast	f__Bracteacoccus minor	g__	s__
ASV059833	k__Bacteria	p__Cyanobacteria	c__Cyanobacteriia	o__Chloroplast	f__Sphagnum angustifolium	g__	s__
ASV059928	k__Bacteria	p__Cyanobacteria	c__Cyanobacteriia	o__Chloroplast	f__	g__	s__
ASV059995	k__Bacteria	p__Cyanobacteria	c__Cyanobacteriia	o__Chloroplast	f__Morus indica	g__	s__
ASV060062	k__Bacteria	p__Cyanobacteria	c__Cyanobacteriia	o__Chloroplast	f__Hydra vulgaris	g__	s__
ASV060181	k__Bacteria	p__Cyanobacteria	c__Cyanobacteriia	o__Chloroplast	f__Picea glauca (white spruce)	g__	s__
ASV060216	k__Bacteria	p__Cyanobacteria	c__Cyanobacteriia	o__Chloroplast	f__	g__	s__
ASV060391	k__Bacteria	p__Cyanobacteria	c__Cyanobacteriia	o__Chloroplast	f__	g__	s__
ASV060407	k__Bacteria	p__Cyanobacteria	c__Cyanobacteriia	o__Chloroplast	f__Morus indica	g__	s__
ASV060920	k__Bacteria	p__Cyanobacteria	c__Cyanobacteriia	o__Chloroplast	f__Gossypium arboreum	g__	s__
ASV061490	k__Bacteria	p__Cyanobacteria	c__Cyanobacteriia	o__Chloroplast	f__	g__	s__
ASV061585	k__Bacteria	p__Cyanobacteria	c__Cyanobacteriia	o__Chloroplast	f__Nicotiana tabacum (common tobacco)	g__	s__
ASV061607	k__Bacteria	p__Cyanobacteria	c__Cyanobacteriia	o__Chloroplast	f__	g__	s__
ASV062018	k__Bacteria	p__Cyanobacteria	c__Cyanobacteriia	o__Chloroplast	f__Dryopteris fragrans	g__	s__
ASV062528	k__Bacteria	p__Cyanobacteria	c__Cyanobacteriia	o__Chloroplast	f__Castanea mollissima (Chinese chestnut)	g__	s__
ASV062865	k__Bacteria	p__Cyanobacteria	c__Cyanobacteriia	o__Chloroplast	f__Hydra vulgaris	g__	s__
ASV062915	k__Bacteria	p__Cyanobacteria	c__Cyanobacteriia	o__Chloroplast	f__Bracteacoccus aerius	g__	s__
ASV062921	k__Bacteria	p__Cyanobacteria	c__Cyanobacteriia	o__Chloroplast	f__Morus indica	g__	s__
ASV062924	k__Bacteria	p__Cyanobacteria	c__Cyanobacteriia	o__Chloroplast	f__Coccomyxa simplex	g__	s__
ASV063005	k__Bacteria	p__Cyanobacteria	c__Cyanobacteriia	o__Chloroplast	f__	g__	s__
ASV063089	k__Bacteria	p__Cyanobacteria	c__Cyanobacteriia	o__Chloroplast	f__Sphagnum angustifolium	g__	s__
ASV063299	k__Bacteria	p__Cyanobacteria	c__Cyanobacteriia	o__Chloroplast	f__	g__	s__
ASV063305	k__Bacteria	p__Cyanobacteria	c__Cyanobacteriia	o__Chloroplast	f__	g__	s__
ASV063794	k__Bacteria	p__Cyanobacteria	c__Cyanobacteriia	o__Chloroplast	f__Morus indica	g__	s__
ASV063971	k__Bacteria	p__Cyanobacteria	c__Cyanobacteriia	o__Chloroplast	f__Coccomyxa viridis	g__	s__
ASV064313	k__Bacteria	p__Cyanobacteria	c__Cyanobacteriia	o__Chloroplast	f__Morus indica	g__	s__
ASV064468	k__Bacteria	p__Cyanobacteria	c__Cyanobacteriia	o__Chloroplast	f__Castanea mollissima (Chinese chestnut)	g__	s__
ASV064504	k__Bacteria	p__Cyanobacteria	c__Cyanobacteriia	o__Chloroplast	f__Morus indica	g__	s__
ASV064592	k__Bacteria	p__Cyanobacteria	c__Cyanobacteriia	o__Chloroplast	f__	g__	s__
ASV064636	k__Bacteria	p__Cyanobacteria	c__Cyanobacteriia	o__Chloroplast	f__Morus indica	g__	s__
ASV064769	k__Bacteria	p__Cyanobacteria	c__Cyanobacteriia	o__Chloroplast	f__Hydra vulgaris	g__	s__
ASV064890	k__Bacteria	p__Cyanobacteria	c__Cyanobacteriia	o__Chloroplast	f__	g__	s__
ASV064896	k__Bacteria	p__Cyanobacteria	c__Cyanobacteriia	o__Chloroplast	f__Elliptochloris bilobata	g__	s__
ASV064897	k__Bacteria	p__Cyanobacteria	c__Cyanobacteriia	o__Chloroplast	f__Morus indica	g__	s__
ASV065308	k__Bacteria	p__Cyanobacteria	c__Cyanobacteriia	o__Chloroplast	f__Morus indica	g__	s__
ASV065442	k__Bacteria	p__Cyanobacteria	c__Cyanobacteriia	o__Chloroplast	f__Elliptochloris bilobata	g__	s__
ASV065682	k__Bacteria	p__Cyanobacteria	c__Cyanobacteriia	o__Chloroplast	f__Morus indica	g__	s__
ASV065798	k__Bacteria	p__Cyanobacteria	c__Cyanobacteriia	o__Chloroplast	f__Morus indica	g__	s__
ASV065840	k__Bacteria	p__Cyanobacteria	c__Cyanobacteriia	o__Chloroplast	f__Morus indica	g__	s__
ASV065841	k__Bacteria	p__Cyanobacteria	c__Cyanobacteriia	o__Chloroplast	f__Ochromonas sp. CCMP1393	g__	s__
ASV065946	k__Bacteria	p__Cyanobacteria	c__Cyanobacteriia	o__Chloroplast	f__Picea glauca (white spruce)	g__	s__
ASV066157	k__Bacteria	p__Cyanobacteria	c__Cyanobacteriia	o__Chloroplast	f__Sphagnum angustifolium	g__	s__
ASV066267	k__Bacteria	p__Cyanobacteria	c__Cyanobacteriia	o__Chloroplast	f__Calycanthus floridus var. glaucus	g__	s__
ASV066353	k__Bacteria	p__Cyanobacteria	c__Cyanobacteriia	o__Chloroplast	f__	g__	s__
ASV066384	k__Bacteria	p__Cyanobacteria	c__Cyanobacteriia	o__Chloroplast	f__Elliptochloris bilobata	g__	s__
ASV066500	k__Bacteria	p__Cyanobacteria	c__Cyanobacteriia	o__Chloroplast	f__Nicotiana tabacum (common tobacco)	g__	s__
ASV066534	k__Bacteria	p__Cyanobacteria	c__Cyanobacteriia	o__Chloroplast	f__Nicotiana tabacum (common tobacco)	g__	s__
ASV066586	k__Bacteria	p__Cyanobacteria	c__Cyanobacteriia	o__Chloroplast	f__Dryopteris fragrans	g__	s__
ASV066725	k__Bacteria	p__Cyanobacteria	c__Cyanobacteriia	o__Chloroplast	f__Nicotiana tabacum (common tobacco)	g__	s__
ASV066878	k__Bacteria	p__Cyanobacteria	c__Cyanobacteriia	o__Chloroplast	f__Morus indica	g__	s__
ASV067122	k__Bacteria	p__Cyanobacteria	c__Cyanobacteriia	o__Chloroplast	f__	g__	s__
ASV067136	k__Bacteria	p__Cyanobacteria	c__Cyanobacteriia	o__Chloroplast	f__Morus indica	g__	s__
ASV067414	k__Bacteria	p__Cyanobacteria	c__Cyanobacteriia	o__Chloroplast	f__Nicotiana tabacum (common tobacco)	g__	s__
ASV067516	k__Bacteria	p__Cyanobacteria	c__Cyanobacteriia	o__Chloroplast	f__Gossypium arboreum	g__	s__
ASV067652	k__Bacteria	p__Cyanobacteria	c__Cyanobacteriia	o__Chloroplast	f__	g__	s__
ASV067876	k__Bacteria	p__Cyanobacteria	c__Cyanobacteriia	o__Chloroplast	f__	g__	s__
ASV067892	k__Bacteria	p__Cyanobacteria	c__Cyanobacteriia	o__Chloroplast	f__Morus indica	g__	s__
ASV068153	k__Bacteria	p__Cyanobacteria	c__Cyanobacteriia	o__Chloroplast	f__Morus indica	g__	s__
ASV068211	k__Bacteria	p__Cyanobacteria	c__Cyanobacteriia	o__Chloroplast	f__Nicotiana tabacum (common tobacco)	g__	s__
ASV068283	k__Bacteria	p__Cyanobacteria	c__Cyanobacteriia	o__Chloroplast	f__Nicotiana tabacum (common tobacco)	g__	s__
ASV068556	k__Bacteria	p__Cyanobacteria	c__Cyanobacteriia	o__Chloroplast	f__Coccomyxa viridis	g__	s__
ASV068741	k__Bacteria	p__Cyanobacteria	c__Cyanobacteriia	o__Chloroplast	f__	g__	s__
ASV068883	k__Bacteria	p__Cyanobacteria	c__Cyanobacteriia	o__Chloroplast	f__Picea glauca (white spruce)	g__	s__
ASV069049	k__Bacteria	p__Cyanobacteria	c__Cyanobacteriia	o__Chloroplast	f__Elliptochloris bilobata	g__	s__
ASV069316	k__Bacteria	p__Cyanobacteria	c__Cyanobacteriia	o__Chloroplast	f__Morus indica	g__	s__
ASV069334	k__Bacteria	p__Cyanobacteria	c__Cyanobacteriia	o__Chloroplast	f__Nicotiana tabacum (common tobacco)	g__	s__
ASV069384	k__Bacteria	p__Cyanobacteria	c__Cyanobacteriia	o__Chloroplast	f__	g__	s__
ASV069489	k__Bacteria	p__Cyanobacteria	c__Cyanobacteriia	o__Chloroplast	f__Picea glauca (white spruce)	g__	s__
ASV069610	k__Bacteria	p__Cyanobacteria	c__Cyanobacteriia	o__Chloroplast	f__Hydra vulgaris	g__	s__
ASV069747	k__Bacteria	p__Cyanobacteria	c__Cyanobacteriia	o__Chloroplast	f__Elliptochloris bilobata	g__	s__
ASV069823	k__Bacteria	p__Cyanobacteria	c__Cyanobacteriia	o__Chloroplast	f__Nicotiana tabacum (common tobacco)	g__	s__
ASV070117	k__Bacteria	p__Cyanobacteria	c__Cyanobacteriia	o__Chloroplast	f__Morus indica	g__	s__
ASV070128	k__Bacteria	p__Cyanobacteria	c__Cyanobacteriia	o__Chloroplast	f__Morus indica	g__	s__
ASV070326	k__Bacteria	p__Cyanobacteria	c__Cyanobacteriia	o__Chloroplast	f__Elliptochloris bilobata	g__	s__
ASV070377	k__Bacteria	p__Cyanobacteria	c__Cyanobacteriia	o__Chloroplast	f__	g__	s__
ASV070525	k__Bacteria	p__Cyanobacteria	c__Cyanobacteriia	o__Chloroplast	f__Bracteacoccus minor	g__	s__
ASV070627	k__Bacteria	p__Cyanobacteria	c__Cyanobacteriia	o__Chloroplast	f__	g__	s__
ASV070651	k__Bacteria	p__Cyanobacteria	c__Cyanobacteriia	o__Chloroplast	f__Elliptochloris bilobata	g__	s__
ASV070667	k__Bacteria	p__Cyanobacteria	c__Cyanobacteriia	o__Chloroplast	f__Calycanthus floridus var. glaucus	g__	s__
ASV070695	k__Bacteria	p__Cyanobacteria	c__Cyanobacteriia	o__Chloroplast	f__	g__	s__
ASV070786	k__Bacteria	p__Cyanobacteria	c__Cyanobacteriia	o__Chloroplast	f__Morus indica	g__	s__
ASV070857	k__Bacteria	p__Cyanobacteria	c__Cyanobacteriia	o__Chloroplast	f__Castanea mollissima (Chinese chestnut)	g__	s__
ASV070962	k__Bacteria	p__Cyanobacteria	c__Cyanobacteriia	o__Chloroplast	f__Morus indica	g__	s__
ASV071173	k__Bacteria	p__Cyanobacteria	c__Cyanobacteriia	o__Chloroplast	f__Coccomyxa viridis	g__	s__
ASV071222	k__Bacteria	p__Cyanobacteria	c__Cyanobacteriia	o__Chloroplast	f__Chloromonas perforata	g__	s__
ASV071290	k__Bacteria	p__Cyanobacteria	c__Cyanobacteriia	o__Chloroplast	f__Elliptochloris bilobata	g__	s__
ASV071306	k__Bacteria	p__Cyanobacteria	c__Cyanobacteriia	o__Chloroplast	f__Nicotiana tabacum (common tobacco)	g__	s__
ASV071421	k__Bacteria	p__Cyanobacteria	c__Cyanobacteriia	o__Chloroplast	f__Morus indica	g__	s__
ASV071426	k__Bacteria	p__Cyanobacteria	c__Cyanobacteriia	o__Chloroplast	f__Hydra vulgaris	g__	s__
ASV071620	k__Bacteria	p__Cyanobacteria	c__Cyanobacteriia	o__Chloroplast	f__	g__	s__
ASV071678	k__Bacteria	p__Cyanobacteria	c__Cyanobacteriia	o__Chloroplast	f__	g__	s__
ASV071823	k__Bacteria	p__Cyanobacteria	c__Cyanobacteriia	o__Chloroplast	f__	g__	s__
ASV071908	k__Bacteria	p__Cyanobacteria	c__Cyanobacteriia	o__Chloroplast	f__	g__	s__
ASV072020	k__Bacteria	p__Cyanobacteria	c__Cyanobacteriia	o__Chloroplast	f__Castanea mollissima (Chinese chestnut)	g__	s__
ASV072074	k__Bacteria	p__Cyanobacteria	c__Cyanobacteriia	o__Chloroplast	f__Symbiochloris handae	g__	s__
ASV072146	k__Bacteria	p__Cyanobacteria	c__Cyanobacteriia	o__Chloroplast	f__Morus indica	g__	s__
ASV072254	k__Bacteria	p__Cyanobacteria	c__Cyanobacteriia	o__Chloroplast	f__Cyperus alternifolius	g__	s__
ASV072319	k__Bacteria	p__Cyanobacteria	c__Cyanobacteriia	o__Chloroplast	f__Elliptochloris bilobata	g__	s__
ASV072429	k__Bacteria	p__Cyanobacteria	c__Cyanobacteriia	o__Chloroplast	f__Nicotiana tabacum (common tobacco)	g__	s__
ASV072743	k__Bacteria	p__Cyanobacteria	c__Cyanobacteriia	o__Chloroplast	f__	g__	s__
ASV072934	k__Bacteria	p__Cyanobacteria	c__Cyanobacteriia	o__Chloroplast	f__	g__	s__
ASV073092	k__Bacteria	p__Cyanobacteria	c__Cyanobacteriia	o__Chloroplast	f__	g__	s__
ASV073099	k__Bacteria	p__Cyanobacteria	c__Cyanobacteriia	o__Chloroplast	f__Morus indica	g__	s__
ASV073321	k__Bacteria	p__Cyanobacteria	c__Cyanobacteriia	o__Chloroplast	f__Sanionia uncinata	g__	s__
ASV073359	k__Bacteria	p__Cyanobacteria	c__Cyanobacteriia	o__Chloroplast	f__Morus indica	g__	s__
ASV073646	k__Bacteria	p__Cyanobacteria	c__Cyanobacteriia	o__Chloroplast	f__	g__	s__
ASV073664	k__Bacteria	p__Cyanobacteria	c__Cyanobacteriia	o__Chloroplast	f__	g__	s__
ASV073839	k__Bacteria	p__Cyanobacteria	c__Cyanobacteriia	o__Chloroplast	f__Nicotiana tabacum (common tobacco)	g__	s__
ASV073852	k__Bacteria	p__Cyanobacteria	c__Cyanobacteriia	o__Chloroplast	f__	g__	s__
ASV073946	k__Bacteria	p__Cyanobacteria	c__Cyanobacteriia	o__Chloroplast	f__Hydra vulgaris	g__	s__
ASV073962	k__Bacteria	p__Cyanobacteria	c__Cyanobacteriia	o__Chloroplast	f__Morus indica	g__	s__
ASV074085	k__Bacteria	p__Cyanobacteria	c__Cyanobacteriia	o__Chloroplast	f__Betula pendula (European white birch)	g__	s__
ASV074209	k__Bacteria	p__Cyanobacteria	c__Cyanobacteriia	o__Chloroplast	f__Morus indica	g__	s__
ASV074290	k__Bacteria	p__Cyanobacteria	c__Cyanobacteriia	o__Chloroplast	f__Elliptochloris bilobata	g__	s__
ASV074335	k__Bacteria	p__Cyanobacteria	c__Cyanobacteriia	o__Chloroplast	f__Paradoxia multiseta	g__	s__
ASV074432	k__Bacteria	p__Cyanobacteria	c__Cyanobacteriia	o__Chloroplast	f__Nicotiana tabacum (common tobacco)	g__	s__
ASV074472	k__Bacteria	p__Cyanobacteria	c__Cyanobacteriia	o__Chloroplast	f__Amborella trichopoda	g__	s__
ASV074508	k__Bacteria	p__Cyanobacteria	c__Cyanobacteriia	o__Chloroplast	f__Elliptochloris bilobata	g__	s__
ASV074566	k__Bacteria	p__Cyanobacteria	c__Cyanobacteriia	o__Chloroplast	f__	g__	s__
ASV074622	k__Bacteria	p__Cyanobacteria	c__Cyanobacteriia	o__Chloroplast	f__	g__	s__
ASV074929	k__Bacteria	p__Cyanobacteria	c__Cyanobacteriia	o__Chloroplast	f__Gossypium arboreum	g__	s__
ASV074940	k__Bacteria	p__Cyanobacteria	c__Cyanobacteriia	o__Chloroplast	f__Ranunculus macranthus	g__	s__
ASV075042	k__Bacteria	p__Cyanobacteria	c__Cyanobacteriia	o__Chloroplast	f__Elliptochloris bilobata	g__	s__
ASV075215	k__Bacteria	p__Cyanobacteria	c__Cyanobacteriia	o__Chloroplast	f__Lactuca sativa	g__	s__
ASV075252	k__Bacteria	p__Cyanobacteria	c__Cyanobacteriia	o__Chloroplast	f__Morus indica	g__	s__
ASV075295	k__Bacteria	p__Cyanobacteria	c__Cyanobacteriia	o__Chloroplast	f__Nicotiana tabacum (common tobacco)	g__	s__
ASV075390	k__Bacteria	p__Cyanobacteria	c__Cyanobacteriia	o__Chloroplast	f__Castanea mollissima (Chinese chestnut)	g__	s__
ASV075444	k__Bacteria	p__Cyanobacteria	c__Cyanobacteriia	o__Chloroplast	f__Sanionia uncinata	g__	s__
ASV075456	k__Bacteria	p__Cyanobacteria	c__Cyanobacteriia	o__Chloroplast	f__	g__	s__
ASV075573	k__Bacteria	p__Cyanobacteria	c__Cyanobacteriia	o__Chloroplast	f__Sphagnum angustifolium	g__	s__
ASV075613	k__Bacteria	p__Cyanobacteria	c__Cyanobacteriia	o__Chloroplast	f__	g__	s__
ASV075717	k__Bacteria	p__Cyanobacteria	c__Cyanobacteriia	o__Chloroplast	f__Morus indica	g__	s__
ASV075845	k__Bacteria	p__Cyanobacteria	c__Cyanobacteriia	o__Chloroplast	f__Morus indica	g__	s__
ASV075943	k__Bacteria	p__Cyanobacteria	c__Cyanobacteriia	o__Chloroplast	f__Morus indica	g__	s__
ASV075998	k__Bacteria	p__Cyanobacteria	c__Cyanobacteriia	o__Chloroplast	f__	g__	s__
ASV076166	k__Bacteria	p__Cyanobacteria	c__Cyanobacteriia	o__Chloroplast	f__Auxenochlorella protothecoides	g__	s__
ASV076180	k__Bacteria	p__Cyanobacteria	c__Cyanobacteriia	o__Chloroplast	f__	g__	s__
ASV076220	k__Bacteria	p__Cyanobacteria	c__Cyanobacteriia	o__Chloroplast	f__Elliptochloris bilobata	g__	s__
ASV076343	k__Bacteria	p__Cyanobacteria	c__Cyanobacteriia	o__Chloroplast	f__Sphagnum angustifolium	g__	s__
ASV076440	k__Bacteria	p__Cyanobacteria	c__Cyanobacteriia	o__Chloroplast	f__	g__	s__
ASV076445	k__Bacteria	p__Cyanobacteria	c__Cyanobacteriia	o__Chloroplast	f__	g__	s__
ASV076462	k__Bacteria	p__Cyanobacteria	c__Cyanobacteriia	o__Chloroplast	f__Nicotiana tabacum (common tobacco)	g__	s__
ASV076564	k__Bacteria	p__Cyanobacteria	c__Cyanobacteriia	o__Chloroplast	f__Elliptochloris bilobata	g__	s__
ASV076602	k__Bacteria	p__Cyanobacteria	c__Cyanobacteriia	o__Chloroplast	f__Lotus corniculatus	g__	s__
ASV076628	k__Bacteria	p__Cyanobacteria	c__Cyanobacteriia	o__Chloroplast	f__Klebsormidium nitens	g__	s__
ASV076643	k__Bacteria	p__Cyanobacteria	c__Cyanobacteriia	o__Chloroplast	f__Morus indica	g__	s__
ASV076697	k__Bacteria	p__Cyanobacteria	c__Cyanobacteriia	o__Chloroplast	f__	g__	s__
ASV077056	k__Bacteria	p__Cyanobacteria	c__Cyanobacteriia	o__Chloroplast	f__	g__	s__
ASV077127	k__Bacteria	p__Cyanobacteria	c__Cyanobacteriia	o__Chloroplast	f__Morus indica	g__	s__
ASV077305	k__Bacteria	p__Cyanobacteria	c__Cyanobacteriia	o__Chloroplast	f__Gossypium arboreum	g__	s__
ASV077644	k__Bacteria	p__Cyanobacteria	c__Cyanobacteriia	o__Chloroplast	f__Morus indica	g__	s__
ASV077660	k__Bacteria	p__Cyanobacteria	c__Cyanobacteriia	o__Chloroplast	f__	g__	s__
ASV077753	k__Bacteria	p__Cyanobacteria	c__Cyanobacteriia	o__Chloroplast	f__	g__	s__
ASV077880	k__Bacteria	p__Cyanobacteria	c__Cyanobacteriia	o__Chloroplast	f__Elliptochloris bilobata	g__	s__
ASV078131	k__Bacteria	p__Cyanobacteria	c__Cyanobacteriia	o__Chloroplast	f__	g__	s__
ASV078137	k__Bacteria	p__Cyanobacteria	c__Cyanobacteriia	o__Chloroplast	f__Bulnesia arborea (Maracaibo lignum-vitae)	g__	s__
ASV078314	k__Bacteria	p__Cyanobacteria	c__Cyanobacteriia	o__Chloroplast	f__Morus indica	g__	s__
ASV078383	k__Bacteria	p__Cyanobacteria	c__Cyanobacteriia	o__Chloroplast	f__	g__	s__
ASV078466	k__Bacteria	p__Cyanobacteria	c__Cyanobacteriia	o__Chloroplast	f__Elliptochloris bilobata	g__	s__
ASV078559	k__Bacteria	p__Cyanobacteria	c__Cyanobacteriia	o__Chloroplast	f__Picea glauca (white spruce)	g__	s__
ASV078723	k__Bacteria	p__Cyanobacteria	c__Cyanobacteriia	o__Chloroplast	f__	g__	s__
ASV078952	k__Bacteria	p__Cyanobacteria	c__Cyanobacteriia	o__Chloroplast	f__Nicotiana tabacum (common tobacco)	g__	s__
ASV079217	k__Bacteria	p__Cyanobacteria	c__Cyanobacteriia	o__Chloroplast	f__	g__	s__
ASV079241	k__Bacteria	p__Cyanobacteria	c__Cyanobacteriia	o__Chloroplast	f__Symbiochloris handae	g__	s__
ASV079309	k__Bacteria	p__Cyanobacteria	c__Cyanobacteriia	o__Chloroplast	f__	g__	s__
ASV079926	k__Bacteria	p__Cyanobacteria	c__Cyanobacteriia	o__Chloroplast	f__Elliptochloris bilobata	g__	s__
ASV080052	k__Bacteria	p__Cyanobacteria	c__Cyanobacteriia	o__Chloroplast	f__Coccomyxa viridis	g__	s__
ASV080223	k__Bacteria	p__Cyanobacteria	c__Cyanobacteriia	o__Chloroplast	f__	g__	s__
ASV080305	k__Bacteria	p__Cyanobacteria	c__Cyanobacteriia	o__Chloroplast	f__	g__	s__
ASV080562	k__Bacteria	p__Cyanobacteria	c__Cyanobacteriia	o__Chloroplast	f__Elliptochloris bilobata	g__	s__
ASV080591	k__Bacteria	p__Cyanobacteria	c__Cyanobacteriia	o__Chloroplast	f__	g__	s__
ASV080629	k__Bacteria	p__Cyanobacteria	c__Cyanobacteriia	o__Chloroplast	f__	g__	s__
ASV080688	k__Bacteria	p__Cyanobacteria	c__Cyanobacteriia	o__Chloroplast	f__Coccomyxa viridis	g__	s__
ASV080782	k__Bacteria	p__Cyanobacteria	c__Cyanobacteriia	o__Chloroplast	f__Morus indica	g__	s__
ASV080845	k__Bacteria	p__Cyanobacteria	c__Cyanobacteriia	o__Chloroplast	f__Morus indica	g__	s__
ASV080951	k__Bacteria	p__Cyanobacteria	c__Cyanobacteriia	o__Chloroplast	f__	g__	s__
ASV081082	k__Bacteria	p__Cyanobacteria	c__Cyanobacteriia	o__Chloroplast	f__	g__	s__
ASV081138	k__Bacteria	p__Cyanobacteria	c__Cyanobacteriia	o__Chloroplast	f__Nicotiana tabacum (common tobacco)	g__	s__
ASV081165	k__Bacteria	p__Cyanobacteria	c__Cyanobacteriia	o__Chloroplast	f__	g__	s__
ASV081361	k__Bacteria	p__Cyanobacteria	c__Cyanobacteriia	o__Chloroplast	f__	g__	s__
ASV081406	k__Bacteria	p__Cyanobacteria	c__Cyanobacteriia	o__Chloroplast	f__Castanea mollissima (Chinese chestnut)	g__	s__
ASV081572	k__Bacteria	p__Cyanobacteria	c__Cyanobacteriia	o__Chloroplast	f__Morus indica	g__	s__
ASV081583	k__Bacteria	p__Cyanobacteria	c__Cyanobacteriia	o__Chloroplast	f__Klebsormidium nitens	g__	s__
ASV081612	k__Bacteria	p__Cyanobacteria	c__Cyanobacteriia	o__Chloroplast	f__Nicotiana tabacum (common tobacco)	g__	s__
ASV081645	k__Bacteria	p__Cyanobacteria	c__Cyanobacteriia	o__Chloroplast	f__Nicotiana tabacum (common tobacco)	g__	s__
ASV081807	k__Bacteria	p__Cyanobacteria	c__Cyanobacteriia	o__Chloroplast	f__Nicotiana tabacum (common tobacco)	g__	s__
ASV081975	k__Bacteria	p__Cyanobacteria	c__Cyanobacteriia	o__Chloroplast	f__	g__	s__
ASV082271	k__Bacteria	p__Cyanobacteria	c__Cyanobacteriia	o__Chloroplast	f__	g__	s__
ASV082337	k__Bacteria	p__Cyanobacteria	c__Cyanobacteriia	o__Chloroplast	f__Morus indica	g__	s__
ASV082360	k__Bacteria	p__Cyanobacteria	c__Cyanobacteriia	o__Chloroplast	f__	g__	s__
ASV082368	k__Bacteria	p__Cyanobacteria	c__Cyanobacteriia	o__Chloroplast	f__Tetradesmus obliquus	g__	s__
ASV082476	k__Bacteria	p__Cyanobacteria	c__Cyanobacteriia	o__Chloroplast	f__Morus indica	g__	s__
ASV083171	k__Bacteria	p__Cyanobacteria	c__Cyanobacteriia	o__Chloroplast	f__Morus indica	g__	s__
ASV083309	k__Bacteria	p__Cyanobacteria	c__Cyanobacteriia	o__Chloroplast	f__Morus indica	g__	s__
ASV083748	k__Bacteria	p__Cyanobacteria	c__Cyanobacteriia	o__Chloroplast	f__	g__	s__
ASV083763	k__Bacteria	p__Cyanobacteria	c__Cyanobacteriia	o__Chloroplast	f__Hydra vulgaris	g__	s__
ASV083765	k__Bacteria	p__Cyanobacteria	c__Cyanobacteriia	o__Chloroplast	f__	g__	s__
ASV083869	k__Bacteria	p__Cyanobacteria	c__Cyanobacteriia	o__Chloroplast	f__Nicotiana tabacum (common tobacco)	g__	s__
ASV084052	k__Bacteria	p__Cyanobacteria	c__Cyanobacteriia	o__Chloroplast	f__Humulus lupulus var. cordifolius	g__	s__
ASV084090	k__Bacteria	p__Cyanobacteria	c__Cyanobacteriia	o__Chloroplast	f__Nicotiana tabacum (common tobacco)	g__	s__
ASV084169	k__Bacteria	p__Cyanobacteria	c__Cyanobacteriia	o__Chloroplast	f__	g__	s__
ASV084252	k__Bacteria	p__Cyanobacteria	c__Cyanobacteriia	o__Chloroplast	f__Nicotiana tabacum (common tobacco)	g__	s__
ASV084470	k__Bacteria	p__Cyanobacteria	c__Cyanobacteriia	o__Chloroplast	f__Eimeria praecox	g__	s__
ASV084579	k__Bacteria	p__Cyanobacteria	c__Cyanobacteriia	o__Chloroplast	f__Morus indica	g__	s__
ASV084595	k__Bacteria	p__Cyanobacteria	c__Cyanobacteriia	o__Chloroplast	f__Nicotiana tabacum (common tobacco)	g__	s__
ASV084642	k__Bacteria	p__Cyanobacteria	c__Cyanobacteriia	o__Chloroplast	f__Nicotiana tabacum (common tobacco)	g__	s__
ASV084695	k__Bacteria	p__Cyanobacteria	c__Cyanobacteriia	o__Chloroplast	f__Chromochloris zofingiensis	g__	s__
ASV084820	k__Bacteria	p__Cyanobacteria	c__Cyanobacteriia	o__Chloroplast	f__Pseudomuriella schumacherensis	g__	s__
ASV084835	k__Bacteria	p__Cyanobacteria	c__Cyanobacteriia	o__Chloroplast	f__	g__	s__
ASV085064	k__Bacteria	p__Cyanobacteria	c__Cyanobacteriia	o__Chloroplast	f__	g__	s__
ASV085166	k__Bacteria	p__Cyanobacteria	c__Cyanobacteriia	o__Chloroplast	f__Morus indica	g__	s__
ASV085181	k__Bacteria	p__Cyanobacteria	c__Cyanobacteriia	o__Chloroplast	f__	g__	s__
ASV085501	k__Bacteria	p__Cyanobacteria	c__Cyanobacteriia	o__Chloroplast	f__Hydra vulgaris	g__	s__
ASV085583	k__Bacteria	p__Cyanobacteria	c__Cyanobacteriia	o__Chloroplast	f__Morus indica	g__	s__
ASV085727	k__Bacteria	p__Cyanobacteria	c__Cyanobacteriia	o__Chloroplast	f__	g__	s__
ASV085738	k__Bacteria	p__Cyanobacteria	c__Cyanobacteriia	o__Chloroplast	f__Hydra vulgaris	g__	s__
ASV085760	k__Bacteria	p__Cyanobacteria	c__Cyanobacteriia	o__Chloroplast	f__Betula pendula (European white birch)	g__	s__
ASV085896	k__Bacteria	p__Cyanobacteria	c__Cyanobacteriia	o__Chloroplast	f__Nicotiana tabacum (common tobacco)	g__	s__
ASV085980	k__Bacteria	p__Cyanobacteria	c__Cyanobacteriia	o__Chloroplast	f__	g__	s__
ASV086385	k__Bacteria	p__Cyanobacteria	c__Cyanobacteriia	o__Chloroplast	f__	g__	s__
ASV086485	k__Bacteria	p__Cyanobacteria	c__Cyanobacteriia	o__Chloroplast	f__	g__	s__
ASV086621	k__Bacteria	p__Cyanobacteria	c__Cyanobacteriia	o__Chloroplast	f__Dryopteris fragrans	g__	s__
ASV086682	k__Bacteria	p__Cyanobacteria	c__Cyanobacteriia	o__Chloroplast	f__Nicotiana tomentosiformis	g__	s__
ASV086969	k__Bacteria	p__Cyanobacteria	c__Cyanobacteriia	o__Chloroplast	f__Coccomyxa viridis	g__	s__
ASV087033	k__Bacteria	p__Cyanobacteria	c__Cyanobacteriia	o__Chloroplast	f__Hydra vulgaris	g__	s__
ASV087084	k__Bacteria	p__Cyanobacteria	c__Cyanobacteriia	o__Chloroplast	f__Morus indica	g__	s__
ASV087179	k__Bacteria	p__Cyanobacteria	c__Cyanobacteriia	o__Chloroplast	f__Calycanthus floridus var. glaucus	g__	s__
ASV087183	k__Bacteria	p__Cyanobacteria	c__Cyanobacteriia	o__Chloroplast	f__Morus indica	g__	s__
ASV087373	k__Bacteria	p__Cyanobacteria	c__Cyanobacteriia	o__Chloroplast	f__	g__	s__
ASV087663	k__Bacteria	p__Cyanobacteria	c__Cyanobacteriia	o__Chloroplast	f__Betula pendula (European white birch)	g__	s__
ASV087680	k__Bacteria	p__Cyanobacteria	c__Cyanobacteriia	o__Chloroplast	f__Nicotiana tabacum (common tobacco)	g__	s__
ASV087681	k__Bacteria	p__Cyanobacteria	c__Cyanobacteriia	o__Chloroplast	f__	g__	s__
ASV087713	k__Bacteria	p__Cyanobacteria	c__Cyanobacteriia	o__Chloroplast	f__Sanionia uncinata	g__	s__
ASV087836	k__Bacteria	p__Cyanobacteria	c__Cyanobacteriia	o__Chloroplast	f__Auxenochlorella protothecoides	g__	s__
ASV088236	k__Bacteria	p__Cyanobacteria	c__Cyanobacteriia	o__Chloroplast	f__Vaccinium macrocarpon	g__	s__
ASV088469	k__Bacteria	p__Cyanobacteria	c__Cyanobacteriia	o__Chloroplast	f__Coccomyxa viridis	g__	s__
ASV088474	k__Bacteria	p__Cyanobacteria	c__Cyanobacteriia	o__Chloroplast	f__Morus indica	g__	s__
ASV088515	k__Bacteria	p__Cyanobacteria	c__Cyanobacteriia	o__Chloroplast	f__	g__	s__
ASV088566	k__Bacteria	p__Cyanobacteria	c__Cyanobacteriia	o__Chloroplast	f__	g__	s__
ASV088908	k__Bacteria	p__Cyanobacteria	c__Cyanobacteriia	o__Chloroplast	f__Bazzania trilobata	g__	s__
ASV088932	k__Bacteria	p__Cyanobacteria	c__Cyanobacteriia	o__Chloroplast	f__Nicotiana tabacum (common tobacco)	g__	s__
ASV088964	k__Bacteria	p__Cyanobacteria	c__Cyanobacteriia	o__Chloroplast	f__Coccomyxa viridis	g__	s__
ASV089107	k__Bacteria	p__Cyanobacteria	c__Cyanobacteriia	o__Chloroplast	f__Morus indica	g__	s__
ASV089162	k__Bacteria	p__Cyanobacteria	c__Cyanobacteriia	o__Chloroplast	f__	g__	s__
ASV089188	k__Bacteria	p__Cyanobacteria	c__Cyanobacteriia	o__Chloroplast	f__Sanionia uncinata	g__	s__
ASV089424	k__Bacteria	p__Cyanobacteria	c__Cyanobacteriia	o__Chloroplast	f__Coccomyxa simplex	g__	s__
ASV089828	k__Bacteria	p__Cyanobacteria	c__Cyanobacteriia	o__Chloroplast	f__Dryopteris fragrans	g__	s__
ASV089878	k__Bacteria	p__Cyanobacteria	c__Cyanobacteriia	o__Chloroplast	f__	g__	s__
ASV089985	k__Bacteria	p__Cyanobacteria	c__Cyanobacteriia	o__Chloroplast	f__	g__	s__
ASV090002	k__Bacteria	p__Cyanobacteria	c__Cyanobacteriia	o__Chloroplast	f__	g__	s__
ASV090037	k__Bacteria	p__Cyanobacteria	c__Cyanobacteriia	o__Chloroplast	f__Elliptochloris bilobata	g__	s__
ASV090092	k__Bacteria	p__Cyanobacteria	c__Cyanobacteriia	o__Chloroplast	f__	g__	s__
ASV090400	k__Bacteria	p__Cyanobacteria	c__Cyanobacteriia	o__Chloroplast	f__Hydra vulgaris	g__	s__
ASV090404	k__Bacteria	p__Cyanobacteria	c__Cyanobacteriia	o__Chloroplast	f__	g__	s__
ASV090618	k__Bacteria	p__Cyanobacteria	c__Cyanobacteriia	o__Chloroplast	f__Tetradesmus obliquus	g__	s__
ASV090742	k__Bacteria	p__Cyanobacteria	c__Cyanobacteriia	o__Chloroplast	f__	g__	s__
ASV090779	k__Bacteria	p__Cyanobacteria	c__Cyanobacteriia	o__Chloroplast	f__Gloeotilopsis sterilis	g__	s__
ASV090810	k__Bacteria	p__Cyanobacteria	c__Cyanobacteriia	o__Chloroplast	f__Symbiochloris handae	g__	s__
ASV090970	k__Bacteria	p__Cyanobacteria	c__Cyanobacteriia	o__Chloroplast	f__Morus indica	g__	s__
ASV090992	k__Bacteria	p__Cyanobacteria	c__Cyanobacteriia	o__Chloroplast	f__Morus indica	g__	s__
ASV091023	k__Bacteria	p__Cyanobacteria	c__Cyanobacteriia	o__Chloroplast	f__Picea glauca (white spruce)	g__	s__
ASV091251	k__Bacteria	p__Cyanobacteria	c__Cyanobacteriia	o__Chloroplast	f__Nicotiana tabacum (common tobacco)	g__	s__
ASV091324	k__Bacteria	p__Cyanobacteria	c__Cyanobacteriia	o__Chloroplast	f__Morus indica	g__	s__
ASV091380	k__Bacteria	p__Cyanobacteria	c__Cyanobacteriia	o__Chloroplast	f__	g__	s__
ASV091693	k__Bacteria	p__Cyanobacteria	c__Cyanobacteriia	o__Chloroplast	f__	g__	s__
ASV091707	k__Bacteria	p__Cyanobacteria	c__Cyanobacteriia	o__Chloroplast	f__	g__	s__
ASV091823	k__Bacteria	p__Cyanobacteria	c__Cyanobacteriia	o__Chloroplast	f__Hydra vulgaris	g__	s__
ASV091904	k__Bacteria	p__Cyanobacteria	c__Cyanobacteriia	o__Chloroplast	f__	g__	s__
ASV091928	k__Bacteria	p__Cyanobacteria	c__Cyanobacteriia	o__Chloroplast	f__	g__	s__
ASV092004	k__Bacteria	p__Cyanobacteria	c__Cyanobacteriia	o__Chloroplast	f__	g__	s__
ASV092042	k__Bacteria	p__Cyanobacteria	c__Cyanobacteriia	o__Chloroplast	f__Taxus mairei	g__	s__
ASV092600	k__Bacteria	p__Cyanobacteria	c__Cyanobacteriia	o__Chloroplast	f__Daucus carota (carrot)	g__	s__
ASV092656	k__Bacteria	p__Cyanobacteria	c__Cyanobacteriia	o__Chloroplast	f__	g__	s__
ASV092825	k__Bacteria	p__Cyanobacteria	c__Cyanobacteriia	o__Chloroplast	f__Coccomyxa viridis	g__	s__
ASV092833	k__Bacteria	p__Cyanobacteria	c__Cyanobacteriia	o__Chloroplast	f__	g__	s__
ASV093023	k__Bacteria	p__Cyanobacteria	c__Cyanobacteriia	o__Chloroplast	f__Hydra vulgaris	g__	s__
ASV093087	k__Bacteria	p__Cyanobacteria	c__Cyanobacteriia	o__Chloroplast	f__	g__	s__
ASV093144	k__Bacteria	p__Cyanobacteria	c__Cyanobacteriia	o__Chloroplast	f__Nicotiana tabacum (common tobacco)	g__	s__
ASV093146	k__Bacteria	p__Cyanobacteria	c__Cyanobacteriia	o__Chloroplast	f__Morus indica	g__	s__
ASV093188	k__Bacteria	p__Cyanobacteria	c__Cyanobacteriia	o__Chloroplast	f__	g__	s__
ASV093282	k__Bacteria	p__Cyanobacteria	c__Cyanobacteriia	o__Chloroplast	f__	g__	s__
ASV093504	k__Bacteria	p__Cyanobacteria	c__Cyanobacteriia	o__Chloroplast	f__	g__	s__
ASV093548	k__Bacteria	p__Cyanobacteria	c__Cyanobacteriia	o__Chloroplast	f__Picea glauca (white spruce)	g__	s__
ASV093614	k__Bacteria	p__Cyanobacteria	c__Cyanobacteriia	o__Chloroplast	f__Morus indica	g__	s__
ASV093822	k__Bacteria	p__Cyanobacteria	c__Cyanobacteriia	o__Chloroplast	f__Coccomyxa viridis	g__	s__
ASV093823	k__Bacteria	p__Cyanobacteria	c__Cyanobacteriia	o__Chloroplast	f__Nicotiana tabacum (common tobacco)	g__	s__
ASV093872	k__Bacteria	p__Cyanobacteria	c__Cyanobacteriia	o__Chloroplast	f__	g__	s__
ASV093909	k__Bacteria	p__Cyanobacteria	c__Cyanobacteriia	o__Chloroplast	f__Symbiochloris handae	g__	s__
ASV094019	k__Bacteria	p__Cyanobacteria	c__Cyanobacteriia	o__Chloroplast	f__Symbiochloris handae	g__	s__
ASV094214	k__Bacteria	p__Cyanobacteria	c__Cyanobacteriia	o__Chloroplast	f__	g__	s__
ASV094269	k__Bacteria	p__Cyanobacteria	c__Cyanobacteriia	o__Chloroplast	f__Daucus carota (carrot)	g__	s__
ASV094433	k__Bacteria	p__Cyanobacteria	c__Cyanobacteriia	o__Chloroplast	f__Morus indica	g__	s__
ASV094576	k__Bacteria	p__Cyanobacteria	c__Cyanobacteriia	o__Chloroplast	f__	g__	s__
ASV094644	k__Bacteria	p__Cyanobacteria	c__Cyanobacteriia	o__Chloroplast	f__	g__	s__
ASV094714	k__Bacteria	p__Cyanobacteria	c__Cyanobacteriia	o__Chloroplast	f__	g__	s__
ASV094833	k__Bacteria	p__Cyanobacteria	c__Cyanobacteriia	o__Chloroplast	f__	g__	s__
ASV094955	k__Bacteria	p__Cyanobacteria	c__Cyanobacteriia	o__Chloroplast	f__Morus indica	g__	s__
ASV095122	k__Bacteria	p__Cyanobacteria	c__Cyanobacteriia	o__Chloroplast	f__Sanionia uncinata	g__	s__
ASV095135	k__Bacteria	p__Cyanobacteria	c__Cyanobacteriia	o__Chloroplast	f__Nicotiana tabacum (common tobacco)	g__	s__
ASV095227	k__Bacteria	p__Cyanobacteria	c__Cyanobacteriia	o__Chloroplast	f__Pyrola rotundifolia	g__	s__
ASV095262	k__Bacteria	p__Cyanobacteria	c__Cyanobacteriia	o__Chloroplast	f__	g__	s__
ASV095345	k__Bacteria	p__Cyanobacteria	c__Cyanobacteriia	o__Chloroplast	f__Gossypium arboreum	g__	s__
ASV095353	k__Bacteria	p__Cyanobacteria	c__Cyanobacteriia	o__Chloroplast	f__Symbiochloris handae	g__	s__
ASV095541	k__Bacteria	p__Cyanobacteria	c__Cyanobacteriia	o__Chloroplast	f__Hydra vulgaris	g__	s__
ASV095579	k__Bacteria	p__Cyanobacteria	c__Cyanobacteriia	o__Chloroplast	f__Morus indica	g__	s__
ASV095804	k__Bacteria	p__Cyanobacteria	c__Cyanobacteriia	o__Chloroplast	f__	g__	s__
ASV095884	k__Bacteria	p__Cyanobacteria	c__Cyanobacteriia	o__Chloroplast	f__Morus indica	g__	s__
ASV096176	k__Bacteria	p__Cyanobacteria	c__Cyanobacteriia	o__Chloroplast	f__	g__	s__
ASV096476	k__Bacteria	p__Cyanobacteria	c__Cyanobacteriia	o__Chloroplast	f__Morus indica	g__	s__
ASV096547	k__Bacteria	p__Cyanobacteria	c__Cyanobacteriia	o__Chloroplast	f__	g__	s__
ASV096551	k__Bacteria	p__Cyanobacteria	c__Cyanobacteriia	o__Chloroplast	f__Sanionia uncinata	g__	s__
ASV096592	k__Bacteria	p__Cyanobacteria	c__Cyanobacteriia	o__Chloroplast	f__Klebsormidium nitens	g__	s__
ASV096682	k__Bacteria	p__Cyanobacteria	c__Cyanobacteriia	o__Chloroplast	f__Betula pendula (European white birch)	g__	s__
ASV096715	k__Bacteria	p__Cyanobacteria	c__Cyanobacteriia	o__Chloroplast	f__	g__	s__
ASV096756	k__Bacteria	p__Cyanobacteria	c__Cyanobacteriia	o__Chloroplast	f__	g__	s__
ASV096757	k__Bacteria	p__Cyanobacteria	c__Cyanobacteriia	o__Chloroplast	f__Morus indica	g__	s__
ASV096830	k__Bacteria	p__Cyanobacteria	c__Cyanobacteriia	o__Chloroplast	f__	g__	s__
ASV096852	k__Bacteria	p__Cyanobacteria	c__Cyanobacteriia	o__Chloroplast	f__	g__	s__
ASV096884	k__Bacteria	p__Cyanobacteria	c__Cyanobacteriia	o__Chloroplast	f__Hydra vulgaris	g__	s__
ASV096934	k__Bacteria	p__Cyanobacteria	c__Cyanobacteriia	o__Chloroplast	f__Nicotiana tabacum (common tobacco)	g__	s__
ASV097001	k__Bacteria	p__Cyanobacteria	c__Cyanobacteriia	o__Chloroplast	f__Picea glauca (white spruce)	g__	s__
ASV097265	k__Bacteria	p__Cyanobacteria	c__Cyanobacteriia	o__Chloroplast	f__Gossypium arboreum	g__	s__
ASV097298	k__Bacteria	p__Cyanobacteria	c__Cyanobacteriia	o__Chloroplast	f__	g__	s__
ASV097407	k__Bacteria	p__Cyanobacteria	c__Cyanobacteriia	o__Chloroplast	f__Morus indica	g__	s__
ASV097535	k__Bacteria	p__Cyanobacteria	c__Cyanobacteriia	o__Chloroplast	f__Sanionia uncinata	g__	s__
ASV097704	k__Bacteria	p__Cyanobacteria	c__Cyanobacteriia	o__Chloroplast	f__Coccomyxa viridis	g__	s__
ASV097723	k__Bacteria	p__Cyanobacteria	c__Cyanobacteriia	o__Chloroplast	f__	g__	s__
ASV098083	k__Bacteria	p__Cyanobacteria	c__Cyanobacteriia	o__Chloroplast	f__Coccomyxa viridis	g__	s__
ASV098129	k__Bacteria	p__Cyanobacteria	c__Cyanobacteriia	o__Chloroplast	f__Vaccinium macrocarpon	g__	s__
ASV098145	k__Bacteria	p__Cyanobacteria	c__Cyanobacteriia	o__Chloroplast	f__	g__	s__
ASV098266	k__Bacteria	p__Cyanobacteria	c__Cyanobacteriia	o__Chloroplast	f__Hydra vulgaris	g__	s__
ASV098715	k__Bacteria	p__Cyanobacteria	c__Cyanobacteriia	o__Chloroplast	f__Citrus maxima	g__	s__
ASV098734	k__Bacteria	p__Cyanobacteria	c__Cyanobacteriia	o__Chloroplast	f__	g__	s__
ASV098822	k__Bacteria	p__Cyanobacteria	c__Cyanobacteriia	o__Chloroplast	f__	g__	s__
ASV098937	k__Bacteria	p__Cyanobacteria	c__Cyanobacteriia	o__Chloroplast	f__Amborella trichopoda	g__	s__
ASV099090	k__Bacteria	p__Cyanobacteria	c__Cyanobacteriia	o__Chloroplast	f__	g__	s__
ASV099188	k__Bacteria	p__Cyanobacteria	c__Cyanobacteriia	o__Chloroplast	f__Morus indica	g__	s__
ASV099207	k__Bacteria	p__Cyanobacteria	c__Cyanobacteriia	o__Chloroplast	f__	g__	s__
ASV100005	k__Bacteria	p__Cyanobacteria	c__Cyanobacteriia	o__Chloroplast	f__	g__	s__
ASV100240	k__Bacteria	p__Cyanobacteria	c__Cyanobacteriia	o__Chloroplast	f__	g__	s__
ASV100265	k__Bacteria	p__Cyanobacteria	c__Cyanobacteriia	o__Chloroplast	f__	g__	s__
ASV100271	k__Bacteria	p__Cyanobacteria	c__Cyanobacteriia	o__Chloroplast	f__	g__	s__
ASV100493	k__Bacteria	p__Cyanobacteria	c__Cyanobacteriia	o__Chloroplast	f__	g__	s__
ASV100640	k__Bacteria	p__Cyanobacteria	c__Cyanobacteriia	o__Chloroplast	f__Morus indica	g__	s__
ASV100641	k__Bacteria	p__Cyanobacteria	c__Cyanobacteriia	o__Chloroplast	f__Taxus mairei	g__	s__
ASV100644	k__Bacteria	p__Cyanobacteria	c__Cyanobacteriia	o__Chloroplast	f__Symbiochloris handae	g__	s__
ASV100648	k__Bacteria	p__Cyanobacteria	c__Cyanobacteriia	o__Chloroplast	f__Elliptochloris bilobata	g__	s__
ASV100700	k__Bacteria	p__Cyanobacteria	c__Cyanobacteriia	o__Chloroplast	f__Picea glauca (white spruce)	g__	s__
ASV100848	k__Bacteria	p__Cyanobacteria	c__Cyanobacteriia	o__Chloroplast	f__	g__	s__
ASV100974	k__Bacteria	p__Cyanobacteria	c__Cyanobacteriia	o__Chloroplast	f__Hydra vulgaris	g__	s__
ASV100996	k__Bacteria	p__Cyanobacteria	c__Cyanobacteriia	o__Chloroplast	f__Hydra vulgaris	g__	s__
ASV101159	k__Bacteria	p__Cyanobacteria	c__Cyanobacteriia	o__Chloroplast	f__	g__	s__
ASV101175	k__Bacteria	p__Cyanobacteria	c__Cyanobacteriia	o__Chloroplast	f__	g__	s__
ASV101220	k__Bacteria	p__Cyanobacteria	c__Cyanobacteriia	o__Chloroplast	f__Morus indica	g__	s__
ASV101298	k__Bacteria	p__Cyanobacteria	c__Cyanobacteriia	o__Chloroplast	f__Castanea mollissima (Chinese chestnut)	g__	s__
ASV101452	k__Bacteria	p__Cyanobacteria	c__Cyanobacteriia	o__Chloroplast	f__	g__	s__
ASV101473	k__Bacteria	p__Cyanobacteria	c__Cyanobacteriia	o__Chloroplast	f__	g__	s__
ASV101568	k__Bacteria	p__Cyanobacteria	c__Cyanobacteriia	o__Chloroplast	f__	g__	s__
ASV101595	k__Bacteria	p__Cyanobacteria	c__Cyanobacteriia	o__Chloroplast	f__Monodopsis sp. MarTras21	g__	s__
ASV101654	k__Bacteria	p__Cyanobacteria	c__Cyanobacteriia	o__Chloroplast	f__	g__	s__
ASV101807	k__Bacteria	p__Cyanobacteria	c__Cyanobacteriia	o__Chloroplast	f__Castanea mollissima (Chinese chestnut)	g__	s__
ASV101938	k__Bacteria	p__Cyanobacteria	c__Cyanobacteriia	o__Chloroplast	f__Dryopteris fragrans	g__	s__
ASV102161	k__Bacteria	p__Cyanobacteria	c__Cyanobacteriia	o__Chloroplast	f__Nicotiana tabacum (common tobacco)	g__	s__
ASV102222	k__Bacteria	p__Cyanobacteria	c__Cyanobacteriia	o__Chloroplast	f__	g__	s__
ASV102375	k__Bacteria	p__Cyanobacteria	c__Cyanobacteriia	o__Chloroplast	f__	g__	s__
ASV102452	k__Bacteria	p__Cyanobacteria	c__Cyanobacteriia	o__Chloroplast	f__Elliptochloris bilobata	g__	s__
ASV102489	k__Bacteria	p__Cyanobacteria	c__Cyanobacteriia	o__Chloroplast	f__Sanionia uncinata	g__	s__
ASV102542	k__Bacteria	p__Cyanobacteria	c__Cyanobacteriia	o__Chloroplast	f__Nicotiana tabacum (common tobacco)	g__	s__
ASV102572	k__Bacteria	p__Cyanobacteria	c__Cyanobacteriia	o__Chloroplast	f__Nicotiana tabacum (common tobacco)	g__	s__
ASV102590	k__Bacteria	p__Cyanobacteria	c__Cyanobacteriia	o__Chloroplast	f__Morus indica	g__	s__
ASV102599	k__Bacteria	p__Cyanobacteria	c__Cyanobacteriia	o__Chloroplast	f__Auxenochlorella protothecoides	g__	s__
ASV102658	k__Bacteria	p__Cyanobacteria	c__Cyanobacteriia	o__Chloroplast	f__Morus indica	g__	s__
ASV102725	k__Bacteria	p__Cyanobacteria	c__Cyanobacteriia	o__Chloroplast	f__Morus indica	g__	s__
ASV102807	k__Bacteria	p__Cyanobacteria	c__Cyanobacteriia	o__Chloroplast	f__	g__	s__
ASV103052	k__Bacteria	p__Cyanobacteria	c__Cyanobacteriia	o__Chloroplast	f__	g__	s__
ASV103184	k__Bacteria	p__Cyanobacteria	c__Cyanobacteriia	o__Chloroplast	f__Picea glauca (white spruce)	g__	s__
ASV103278	k__Bacteria	p__Cyanobacteria	c__Cyanobacteriia	o__Chloroplast	f__Hydra vulgaris	g__	s__
ASV103887	k__Bacteria	p__Cyanobacteria	c__Cyanobacteriia	o__Chloroplast	f__Hydra vulgaris	g__	s__
ASV103902	k__Bacteria	p__Cyanobacteria	c__Cyanobacteriia	o__Chloroplast	f__	g__	s__
ASV104131	k__Bacteria	p__Cyanobacteria	c__Cyanobacteriia	o__Chloroplast	f__	g__	s__
ASV104138	k__Bacteria	p__Cyanobacteria	c__Cyanobacteriia	o__Chloroplast	f__	g__	s__
ASV104307	k__Bacteria	p__Cyanobacteria	c__Cyanobacteriia	o__Chloroplast	f__Didymosphenia geminata	g__	s__
ASV104372	k__Bacteria	p__Cyanobacteria	c__Cyanobacteriia	o__Chloroplast	f__	g__	s__
ASV104403	k__Bacteria	p__Cyanobacteria	c__Cyanobacteriia	o__Chloroplast	f__Coccomyxa viridis	g__	s__
ASV104418	k__Bacteria	p__Cyanobacteria	c__Cyanobacteriia	o__Chloroplast	f__Morus indica	g__	s__
ASV104527	k__Bacteria	p__Cyanobacteria	c__Cyanobacteriia	o__Chloroplast	f__Cladosiphon okamuranus	g__	s__
ASV104578	k__Bacteria	p__Cyanobacteria	c__Cyanobacteriia	o__Chloroplast	f__	g__	s__
ASV104587	k__Bacteria	p__Cyanobacteria	c__Cyanobacteriia	o__Chloroplast	f__Nicotiana tabacum (common tobacco)	g__	s__
ASV105021	k__Bacteria	p__Cyanobacteria	c__Cyanobacteriia	o__Chloroplast	f__Morus indica	g__	s__
ASV105150	k__Bacteria	p__Cyanobacteria	c__Cyanobacteriia	o__Chloroplast	f__Morus indica	g__	s__
ASV105556	k__Bacteria	p__Cyanobacteria	c__Cyanobacteriia	o__Chloroplast	f__Paradoxia multiseta	g__	s__
ASV106133	k__Bacteria	p__Cyanobacteria	c__Cyanobacteriia	o__Chloroplast	f__	g__	s__
ASV106173	k__Bacteria	p__Cyanobacteria	c__Cyanobacteriia	o__Chloroplast	f__	g__	s__
ASV106412	k__Bacteria	p__Cyanobacteria	c__Cyanobacteriia	o__Chloroplast	f__	g__	s__
ASV106571	k__Bacteria	p__Cyanobacteria	c__Cyanobacteriia	o__Chloroplast	f__Elliptochloris bilobata	g__	s__
ASV106623	k__Bacteria	p__Cyanobacteria	c__Cyanobacteriia	o__Chloroplast	f__Coccomyxa viridis	g__	s__
ASV106746	k__Bacteria	p__Cyanobacteria	c__Cyanobacteriia	o__Chloroplast	f__Morus indica	g__	s__
ASV106840	k__Bacteria	p__Cyanobacteria	c__Cyanobacteriia	o__Chloroplast	f__Elliptochloris bilobata	g__	s__
ASV106852	k__Bacteria	p__Cyanobacteria	c__Cyanobacteriia	o__Chloroplast	f__Morus indica	g__	s__
ASV107023	k__Bacteria	p__Cyanobacteria	c__Cyanobacteriia	o__Chloroplast	f__Morus indica	g__	s__
ASV107126	k__Bacteria	p__Cyanobacteria	c__Cyanobacteriia	o__Chloroplast	f__Morus indica	g__	s__
ASV107134	k__Bacteria	p__Cyanobacteria	c__Cyanobacteriia	o__Chloroplast	f__Dryopteris fragrans	g__	s__
ASV107695	k__Bacteria	p__Cyanobacteria	c__Cyanobacteriia	o__Chloroplast	f__Picea glauca (white spruce)	g__	s__
ASV107978	k__Bacteria	p__Cyanobacteria	c__Cyanobacteriia	o__Chloroplast	f__Castanea mollissima (Chinese chestnut)	g__	s__
ASV108125	k__Bacteria	p__Cyanobacteria	c__Cyanobacteriia	o__Chloroplast	f__	g__	s__
ASV108161	k__Bacteria	p__Cyanobacteria	c__Cyanobacteriia	o__Chloroplast	f__	g__	s__
ASV108376	k__Bacteria	p__Cyanobacteria	c__Cyanobacteriia	o__Chloroplast	f__Morus indica	g__	s__
ASV108466	k__Bacteria	p__Cyanobacteria	c__Cyanobacteriia	o__Chloroplast	f__	g__	s__
ASV108481	k__Bacteria	p__Cyanobacteria	c__Cyanobacteriia	o__Chloroplast	f__	g__	s__
ASV108557	k__Bacteria	p__Cyanobacteria	c__Cyanobacteriia	o__Chloroplast	f__	g__	s__
ASV108576	k__Bacteria	p__Cyanobacteria	c__Cyanobacteriia	o__Chloroplast	f__	g__	s__
ASV108790	k__Bacteria	p__Cyanobacteria	c__Cyanobacteriia	o__Chloroplast	f__Morus indica	g__	s__
ASV108835	k__Bacteria	p__Cyanobacteria	c__Cyanobacteriia	o__Chloroplast	f__Nicotiana tabacum (common tobacco)	g__	s__
ASV109002	k__Bacteria	p__Cyanobacteria	c__Cyanobacteriia	o__Chloroplast	f__	g__	s__
ASV109090	k__Bacteria	p__Cyanobacteria	c__Cyanobacteriia	o__Chloroplast	f__Nicotiana tabacum (common tobacco)	g__	s__
ASV109211	k__Bacteria	p__Cyanobacteria	c__Cyanobacteriia	o__Chloroplast	f__	g__	s__
ASV109306	k__Bacteria	p__Cyanobacteria	c__Cyanobacteriia	o__Chloroplast	f__	g__	s__
ASV109775	k__Bacteria	p__Cyanobacteria	c__Cyanobacteriia	o__Chloroplast	f__Hydra vulgaris	g__	s__
ASV110034	k__Bacteria	p__Cyanobacteria	c__Cyanobacteriia	o__Chloroplast	f__Coccomyxa viridis	g__	s__
ASV110167	k__Bacteria	p__Cyanobacteria	c__Cyanobacteriia	o__Chloroplast	f__	g__	s__
ASV110187	k__Bacteria	p__Cyanobacteria	c__Cyanobacteriia	o__Chloroplast	f__	g__	s__
ASV110251	k__Bacteria	p__Cyanobacteria	c__Cyanobacteriia	o__Chloroplast	f__Morus indica	g__	s__
ASV110486	k__Bacteria	p__Cyanobacteria	c__Cyanobacteriia	o__Chloroplast	f__	g__	s__
ASV110586	k__Bacteria	p__Cyanobacteria	c__Cyanobacteriia	o__Chloroplast	f__Nicotiana tabacum (common tobacco)	g__	s__
ASV110695	k__Bacteria	p__Cyanobacteria	c__Cyanobacteriia	o__Chloroplast	f__Morus indica	g__	s__
ASV110788	k__Bacteria	p__Cyanobacteria	c__Cyanobacteriia	o__Chloroplast	f__Coccomyxa simplex	g__	s__
ASV110852	k__Bacteria	p__Cyanobacteria	c__Cyanobacteriia	o__Chloroplast	f__Hydra vulgaris	g__	s__
ASV110887	k__Bacteria	p__Cyanobacteria	c__Cyanobacteriia	o__Chloroplast	f__Picea glauca (white spruce)	g__	s__
ASV110970	k__Bacteria	p__Cyanobacteria	c__Cyanobacteriia	o__Chloroplast	f__	g__	s__
ASV111011	k__Bacteria	p__Cyanobacteria	c__Cyanobacteriia	o__Chloroplast	f__Ochromonas sp. CCMP1393	g__	s__
ASV111018	k__Bacteria	p__Cyanobacteria	c__Cyanobacteriia	o__Chloroplast	f__	g__	s__
ASV111223	k__Bacteria	p__Cyanobacteria	c__Cyanobacteriia	o__Chloroplast	f__Durinskia baltica	g__	s__
ASV111367	k__Bacteria	p__Cyanobacteria	c__Cyanobacteriia	o__Chloroplast	f__	g__	s__
ASV111428	k__Bacteria	p__Cyanobacteria	c__Cyanobacteriia	o__Chloroplast	f__Nicotiana tabacum (common tobacco)	g__	s__
ASV111469	k__Bacteria	p__Cyanobacteria	c__Cyanobacteriia	o__Chloroplast	f__Dryopteris fragrans	g__	s__
ASV111569	k__Bacteria	p__Cyanobacteria	c__Cyanobacteriia	o__Chloroplast	f__Betula pendula (European white birch)	g__	s__
ASV111652	k__Bacteria	p__Cyanobacteria	c__Cyanobacteriia	o__Chloroplast	f__Nicotiana tabacum (common tobacco)	g__	s__
ASV111748	k__Bacteria	p__Cyanobacteria	c__Cyanobacteriia	o__Chloroplast	f__	g__	s__
ASV111915	k__Bacteria	p__Cyanobacteria	c__Cyanobacteriia	o__Chloroplast	f__Elliptochloris bilobata	g__	s__
ASV111932	k__Bacteria	p__Cyanobacteria	c__Cyanobacteriia	o__Chloroplast	f__	g__	s__
ASV111942	k__Bacteria	p__Cyanobacteria	c__Cyanobacteriia	o__Chloroplast	f__Castanea mollissima (Chinese chestnut)	g__	s__
ASV112068	k__Bacteria	p__Cyanobacteria	c__Cyanobacteriia	o__Chloroplast	f__Coccomyxa simplex	g__	s__
ASV112254	k__Bacteria	p__Cyanobacteria	c__Cyanobacteriia	o__Chloroplast	f__	g__	s__
ASV112378	k__Bacteria	p__Cyanobacteria	c__Cyanobacteriia	o__Chloroplast	f__	g__	s__
ASV112444	k__Bacteria	p__Cyanobacteria	c__Cyanobacteriia	o__Chloroplast	f__	g__	s__
ASV112493	k__Bacteria	p__Cyanobacteria	c__Cyanobacteriia	o__Chloroplast	f__	g__	s__
ASV112591	k__Bacteria	p__Cyanobacteria	c__Cyanobacteriia	o__Chloroplast	f__Morus indica	g__	s__
ASV112813	k__Bacteria	p__Cyanobacteria	c__Cyanobacteriia	o__Chloroplast	f__Triosteum pinnatifidum	g__	s__
ASV112915	k__Bacteria	p__Cyanobacteria	c__Cyanobacteriia	o__Chloroplast	f__Heveochlorella hainangensis	g__	s__
ASV113184	k__Bacteria	p__Cyanobacteria	c__Cyanobacteriia	o__Chloroplast	f__Elliptochloris bilobata	g__	s__
ASV113185	k__Bacteria	p__Cyanobacteria	c__Cyanobacteriia	o__Chloroplast	f__	g__	s__
ASV113289	k__Bacteria	p__Cyanobacteria	c__Cyanobacteriia	o__Chloroplast	f__Morus indica	g__	s__
ASV113332	k__Bacteria	p__Cyanobacteria	c__Cyanobacteriia	o__Chloroplast	f__	g__	s__
ASV113401	k__Bacteria	p__Cyanobacteria	c__Cyanobacteriia	o__Chloroplast	f__	g__	s__
ASV113406	k__Bacteria	p__Cyanobacteria	c__Cyanobacteriia	o__Chloroplast	f__Morus indica	g__	s__
ASV113611	k__Bacteria	p__Cyanobacteria	c__Cyanobacteriia	o__Chloroplast	f__	g__	s__
ASV113669	k__Bacteria	p__Cyanobacteria	c__Cyanobacteriia	o__Chloroplast	f__	g__	s__
ASV113705	k__Bacteria	p__Cyanobacteria	c__Cyanobacteriia	o__Chloroplast	f__Morus indica	g__	s__
ASV113878	k__Bacteria	p__Cyanobacteria	c__Cyanobacteriia	o__Chloroplast	f__Morus indica	g__	s__
ASV113892	k__Bacteria	p__Cyanobacteria	c__Cyanobacteriia	o__Chloroplast	f__Coccomyxa simplex	g__	s__
ASV113917	k__Bacteria	p__Cyanobacteria	c__Cyanobacteriia	o__Chloroplast	f__	g__	s__
ASV114040	k__Bacteria	p__Cyanobacteria	c__Cyanobacteriia	o__Chloroplast	f__	g__	s__
ASV114053	k__Bacteria	p__Cyanobacteria	c__Cyanobacteriia	o__Chloroplast	f__Nicotiana tabacum (common tobacco)	g__	s__
ASV114093	k__Bacteria	p__Cyanobacteria	c__Cyanobacteriia	o__Chloroplast	f__Elliptochloris bilobata	g__	s__
ASV114216	k__Bacteria	p__Cyanobacteria	c__Cyanobacteriia	o__Chloroplast	f__Vaccinium macrocarpon	g__	s__
ASV114237	k__Bacteria	p__Cyanobacteria	c__Cyanobacteriia	o__Chloroplast	f__Gossypium arboreum	g__	s__
ASV114392	k__Bacteria	p__Cyanobacteria	c__Cyanobacteriia	o__Chloroplast	f__Hydra vulgaris	g__	s__
ASV114653	k__Bacteria	p__Cyanobacteria	c__Cyanobacteriia	o__Chloroplast	f__Sphagnum angustifolium	g__	s__
ASV114698	k__Bacteria	p__Cyanobacteria	c__Cyanobacteriia	o__Chloroplast	f__Nicotiana tabacum (common tobacco)	g__	s__
ASV114890	k__Bacteria	p__Cyanobacteria	c__Cyanobacteriia	o__Chloroplast	f__Morus indica	g__	s__
ASV115101	k__Bacteria	p__Cyanobacteria	c__Cyanobacteriia	o__Chloroplast	f__	g__	s__
ASV115171	k__Bacteria	p__Cyanobacteria	c__Cyanobacteriia	o__Chloroplast	f__Castanea mollissima (Chinese chestnut)	g__	s__
ASV115180	k__Bacteria	p__Cyanobacteria	c__Cyanobacteriia	o__Chloroplast	f__Stichococcus bacillaris	g__	s__
ASV115257	k__Bacteria	p__Cyanobacteria	c__Cyanobacteriia	o__Chloroplast	f__Nicotiana tabacum (common tobacco)	g__	s__
ASV115515	k__Bacteria	p__Cyanobacteria	c__Cyanobacteriia	o__Chloroplast	f__Morus indica	g__	s__
ASV115592	k__Bacteria	p__Cyanobacteria	c__Cyanobacteriia	o__Chloroplast	f__	g__	s__
ASV115680	k__Bacteria	p__Cyanobacteria	c__Cyanobacteriia	o__Chloroplast	f__	g__	s__
ASV115885	k__Bacteria	p__Cyanobacteria	c__Cyanobacteriia	o__Chloroplast	f__Nicotiana tabacum (common tobacco)	g__	s__
ASV116060	k__Bacteria	p__Cyanobacteria	c__Cyanobacteriia	o__Chloroplast	f__	g__	s__
ASV116157	k__Bacteria	p__Cyanobacteria	c__Cyanobacteriia	o__Chloroplast	f__	g__	s__
ASV116411	k__Bacteria	p__Cyanobacteria	c__Cyanobacteriia	o__Chloroplast	f__Morus indica	g__	s__
ASV116453	k__Bacteria	p__Cyanobacteria	c__Cyanobacteriia	o__Chloroplast	f__Coccomyxa viridis	g__	s__
ASV116651	k__Bacteria	p__Cyanobacteria	c__Cyanobacteriia	o__Chloroplast	f__Morus indica	g__	s__
ASV116710	k__Bacteria	p__Cyanobacteria	c__Cyanobacteriia	o__Chloroplast	f__Morus indica	g__	s__
ASV116714	k__Bacteria	p__Cyanobacteria	c__Cyanobacteriia	o__Chloroplast	f__	g__	s__
ASV116808	k__Bacteria	p__Cyanobacteria	c__Cyanobacteriia	o__Chloroplast	f__Coccomyxa viridis	g__	s__
ASV116953	k__Bacteria	p__Cyanobacteria	c__Cyanobacteriia	o__Chloroplast	f__Hydra vulgaris	g__	s__
ASV117059	k__Bacteria	p__Cyanobacteria	c__Cyanobacteriia	o__Chloroplast	f__Castanea mollissima (Chinese chestnut)	g__	s__
ASV117287	k__Bacteria	p__Cyanobacteria	c__Cyanobacteriia	o__Chloroplast	f__Nicotiana tabacum (common tobacco)	g__	s__
ASV117385	k__Bacteria	p__Cyanobacteria	c__Cyanobacteriia	o__Chloroplast	f__Nicotiana tabacum (common tobacco)	g__	s__
ASV117583	k__Bacteria	p__Cyanobacteria	c__Cyanobacteriia	o__Chloroplast	f__Gossypium arboreum	g__	s__
ASV117609	k__Bacteria	p__Cyanobacteria	c__Cyanobacteriia	o__Chloroplast	f__	g__	s__
ASV117773	k__Bacteria	p__Cyanobacteria	c__Cyanobacteriia	o__Chloroplast	f__	g__	s__
ASV117791	k__Bacteria	p__Cyanobacteria	c__Cyanobacteriia	o__Chloroplast	f__Picea glauca (white spruce)	g__	s__
ASV117850	k__Bacteria	p__Cyanobacteria	c__Cyanobacteriia	o__Chloroplast	f__Hydra vulgaris	g__	s__
ASV118142	k__Bacteria	p__Cyanobacteria	c__Cyanobacteriia	o__Chloroplast	f__Nicotiana tabacum (common tobacco)	g__	s__
ASV118367	k__Bacteria	p__Cyanobacteria	c__Cyanobacteriia	o__Chloroplast	f__Nicotiana tabacum (common tobacco)	g__	s__
ASV118412	k__Bacteria	p__Cyanobacteria	c__Cyanobacteriia	o__Chloroplast	f__Nicotiana tabacum (common tobacco)	g__	s__
ASV118560	k__Bacteria	p__Cyanobacteria	c__Cyanobacteriia	o__Chloroplast	f__Nicotiana tabacum (common tobacco)	g__	s__
ASV119129	k__Bacteria	p__Cyanobacteria	c__Cyanobacteriia	o__Chloroplast	f__Morus indica	g__	s__
ASV119254	k__Bacteria	p__Cyanobacteria	c__Cyanobacteriia	o__Chloroplast	f__Dryopteris fragrans	g__	s__
ASV119593	k__Bacteria	p__Cyanobacteria	c__Cyanobacteriia	o__Chloroplast	f__Nicotiana tabacum (common tobacco)	g__	s__
ASV119599	k__Bacteria	p__Cyanobacteria	c__Cyanobacteriia	o__Chloroplast	f__Morus indica	g__	s__
ASV119662	k__Bacteria	p__Cyanobacteria	c__Cyanobacteriia	o__Chloroplast	f__Nyholmiella obtusifolia	g__	s__
ASV119681	k__Bacteria	p__Cyanobacteria	c__Cyanobacteriia	o__Chloroplast	f__Symbiochloris handae	g__	s__
ASV119729	k__Bacteria	p__Cyanobacteria	c__Cyanobacteriia	o__Chloroplast	f__	g__	s__
ASV119809	k__Bacteria	p__Cyanobacteria	c__Cyanobacteriia	o__Chloroplast	f__Morus indica	g__	s__
ASV119929	k__Bacteria	p__Cyanobacteria	c__Cyanobacteriia	o__Chloroplast	f__	g__	s__
ASV119959	k__Bacteria	p__Cyanobacteria	c__Cyanobacteriia	o__Chloroplast	f__Gossypium arboreum	g__	s__
ASV120077	k__Bacteria	p__Cyanobacteria	c__Cyanobacteriia	o__Chloroplast	f__	g__	s__
ASV120172	k__Bacteria	p__Cyanobacteria	c__Cyanobacteriia	o__Chloroplast	f__Sphagnum angustifolium	g__	s__
ASV120186	k__Bacteria	p__Cyanobacteria	c__Cyanobacteriia	o__Chloroplast	f__	g__	s__
ASV120214	k__Bacteria	p__Cyanobacteria	c__Cyanobacteriia	o__Chloroplast	f__	g__	s__
ASV120240	k__Bacteria	p__Cyanobacteria	c__Cyanobacteriia	o__Chloroplast	f__Morus indica	g__	s__
ASV120410	k__Bacteria	p__Cyanobacteria	c__Cyanobacteriia	o__Chloroplast	f__Morus indica	g__	s__
ASV120678	k__Bacteria	p__Cyanobacteria	c__Cyanobacteriia	o__Chloroplast	f__Morus indica	g__	s__
ASV120683	k__Bacteria	p__Cyanobacteria	c__Cyanobacteriia	o__Chloroplast	f__Coccomyxa viridis	g__	s__
ASV120739	k__Bacteria	p__Cyanobacteria	c__Cyanobacteriia	o__Chloroplast	f__	g__	s__
ASV120866	k__Bacteria	p__Cyanobacteria	c__Cyanobacteriia	o__Chloroplast	f__	g__	s__
ASV120990	k__Bacteria	p__Cyanobacteria	c__Cyanobacteriia	o__Chloroplast	f__Nicotiana tabacum (common tobacco)	g__	s__
ASV121005	k__Bacteria	p__Cyanobacteria	c__Cyanobacteriia	o__Chloroplast	f__Pseudochlorella pringsheimii	g__	s__
ASV121126	k__Bacteria	p__Cyanobacteria	c__Cyanobacteriia	o__Chloroplast	f__Nicotiana tabacum (common tobacco)	g__	s__
ASV121290	k__Bacteria	p__Cyanobacteria	c__Cyanobacteriia	o__Chloroplast	f__Nicotiana tabacum (common tobacco)	g__	s__
ASV121469	k__Bacteria	p__Cyanobacteria	c__Cyanobacteriia	o__Chloroplast	f__Chlorella vulgaris	g__	s__
ASV121516	k__Bacteria	p__Cyanobacteria	c__Cyanobacteriia	o__Chloroplast	f__	g__	s__
ASV121626	k__Bacteria	p__Cyanobacteria	c__Cyanobacteriia	o__Chloroplast	f__	g__	s__
ASV121966	k__Bacteria	p__Cyanobacteria	c__Cyanobacteriia	o__Chloroplast	f__Nicotiana tabacum (common tobacco)	g__	s__
ASV122064	k__Bacteria	p__Cyanobacteria	c__Cyanobacteriia	o__Chloroplast	f__Coccomyxa viridis	g__	s__
ASV122663	k__Bacteria	p__Cyanobacteria	c__Cyanobacteriia	o__Chloroplast	f__	g__	s__
ASV122687	k__Bacteria	p__Cyanobacteria	c__Cyanobacteriia	o__Chloroplast	f__	g__	s__
ASV122716	k__Bacteria	p__Cyanobacteria	c__Cyanobacteriia	o__Chloroplast	f__	g__	s__
ASV122731	k__Bacteria	p__Cyanobacteria	c__Cyanobacteriia	o__Chloroplast	f__Dryopteris fragrans	g__	s__
ASV122768	k__Bacteria	p__Cyanobacteria	c__Cyanobacteriia	o__Chloroplast	f__Morus indica	g__	s__
ASV122784	k__Bacteria	p__Cyanobacteria	c__Cyanobacteriia	o__Chloroplast	f__Morus indica	g__	s__
ASV122982	k__Bacteria	p__Cyanobacteria	c__Cyanobacteriia	o__Chloroplast	f__	g__	s__
ASV123121	k__Bacteria	p__Cyanobacteria	c__Cyanobacteriia	o__Chloroplast	f__Morus indica	g__	s__
ASV123186	k__Bacteria	p__Cyanobacteria	c__Cyanobacteriia	o__Chloroplast	f__Elliptochloris bilobata	g__	s__
ASV123190	k__Bacteria	p__Cyanobacteria	c__Cyanobacteriia	o__Chloroplast	f__	g__	s__
ASV123254	k__Bacteria	p__Cyanobacteria	c__Cyanobacteriia	o__Chloroplast	f__Eimeria praecox	g__	s__
ASV123405	k__Bacteria	p__Cyanobacteria	c__Cyanobacteriia	o__Chloroplast	f__Betula pendula (European white birch)	g__	s__
ASV123450	k__Bacteria	p__Cyanobacteria	c__Cyanobacteriia	o__Chloroplast	f__Morus indica	g__	s__
ASV123513	k__Bacteria	p__Cyanobacteria	c__Cyanobacteriia	o__Chloroplast	f__Morus indica	g__	s__
ASV123550	k__Bacteria	p__Cyanobacteria	c__Cyanobacteriia	o__Chloroplast	f__Bracteacoccus minor	g__	s__
ASV123553	k__Bacteria	p__Cyanobacteria	c__Cyanobacteriia	o__Chloroplast	f__	g__	s__
ASV123596	k__Bacteria	p__Cyanobacteria	c__Cyanobacteriia	o__Chloroplast	f__Vaccinium macrocarpon	g__	s__
ASV123622	k__Bacteria	p__Cyanobacteria	c__Cyanobacteriia	o__Chloroplast	f__Vaccinium macrocarpon	g__	s__
ASV123716	k__Bacteria	p__Cyanobacteria	c__Cyanobacteriia	o__Chloroplast	f__	g__	s__
ASV123844	k__Bacteria	p__Cyanobacteria	c__Cyanobacteriia	o__Chloroplast	f__	g__	s__
ASV123847	k__Bacteria	p__Cyanobacteria	c__Cyanobacteriia	o__Chloroplast	f__	g__	s__
ASV123880	k__Bacteria	p__Cyanobacteria	c__Cyanobacteriia	o__Chloroplast	f__	g__	s__
ASV123906	k__Bacteria	p__Cyanobacteria	c__Cyanobacteriia	o__Chloroplast	f__	g__	s__
ASV123991	k__Bacteria	p__Cyanobacteria	c__Cyanobacteriia	o__Chloroplast	f__Morus indica	g__	s__
ASV124063	k__Bacteria	p__Cyanobacteria	c__Cyanobacteriia	o__Chloroplast	f__Coccomyxa viridis	g__	s__
ASV124087	k__Bacteria	p__Cyanobacteria	c__Cyanobacteriia	o__Chloroplast	f__Hydra vulgaris	g__	s__
ASV124442	k__Bacteria	p__Cyanobacteria	c__Cyanobacteriia	o__Chloroplast	f__	g__	s__
ASV124498	k__Bacteria	p__Cyanobacteria	c__Cyanobacteriia	o__Chloroplast	f__Picea glauca (white spruce)	g__	s__
ASV124543	k__Bacteria	p__Cyanobacteria	c__Cyanobacteriia	o__Chloroplast	f__	g__	s__
ASV124597	k__Bacteria	p__Cyanobacteria	c__Cyanobacteriia	o__Chloroplast	f__	g__	s__
ASV124601	k__Bacteria	p__Cyanobacteria	c__Cyanobacteriia	o__Chloroplast	f__Elliptochloris bilobata	g__	s__
ASV124619	k__Bacteria	p__Cyanobacteria	c__Cyanobacteriia	o__Chloroplast	f__Elliptochloris bilobata	g__	s__
ASV124638	k__Bacteria	p__Cyanobacteria	c__Cyanobacteriia	o__Chloroplast	f__Hydra vulgaris	g__	s__
ASV124719	k__Bacteria	p__Cyanobacteria	c__Cyanobacteriia	o__Chloroplast	f__Nicotiana tabacum (common tobacco)	g__	s__
ASV124983	k__Bacteria	p__Cyanobacteria	c__Cyanobacteriia	o__Chloroplast	f__Morus indica	g__	s__
ASV125122	k__Bacteria	p__Cyanobacteria	c__Cyanobacteriia	o__Chloroplast	f__Gloeotilopsis sterilis	g__	s__
ASV125168	k__Bacteria	p__Cyanobacteria	c__Cyanobacteriia	o__Chloroplast	f__Nicotiana tabacum (common tobacco)	g__	s__
ASV125407	k__Bacteria	p__Cyanobacteria	c__Cyanobacteriia	o__Chloroplast	f__	g__	s__
ASV125692	k__Bacteria	p__Cyanobacteria	c__Cyanobacteriia	o__Chloroplast	f__Morus indica	g__	s__
ASV125716	k__Bacteria	p__Cyanobacteria	c__Cyanobacteriia	o__Chloroplast	f__Elliptochloris bilobata	g__	s__
ASV125847	k__Bacteria	p__Cyanobacteria	c__Cyanobacteriia	o__Chloroplast	f__Morus indica	g__	s__
ASV126048	k__Bacteria	p__Cyanobacteria	c__Cyanobacteriia	o__Chloroplast	f__Lactuca sativa	g__	s__
ASV126256	k__Bacteria	p__Cyanobacteria	c__Cyanobacteriia	o__Chloroplast	f__	g__	s__
ASV126270	k__Bacteria	p__Cyanobacteria	c__Cyanobacteriia	o__Chloroplast	f__Coccomyxa viridis	g__	s__
ASV126282	k__Bacteria	p__Cyanobacteria	c__Cyanobacteriia	o__Chloroplast	f__Nicotiana tabacum (common tobacco)	g__	s__
ASV126296	k__Bacteria	p__Cyanobacteria	c__Cyanobacteriia	o__Chloroplast	f__Picea glauca (white spruce)	g__	s__
ASV126368	k__Bacteria	p__Cyanobacteria	c__Cyanobacteriia	o__Chloroplast	f__Sphagnum angustifolium	g__	s__
ASV126474	k__Bacteria	p__Cyanobacteria	c__Cyanobacteriia	o__Chloroplast	f__	g__	s__
ASV126608	k__Bacteria	p__Cyanobacteria	c__Cyanobacteriia	o__Chloroplast	f__	g__	s__
ASV126637	k__Bacteria	p__Cyanobacteria	c__Cyanobacteriia	o__Chloroplast	f__Picea glauca (white spruce)	g__	s__
ASV126647	k__Bacteria	p__Cyanobacteria	c__Cyanobacteriia	o__Chloroplast	f__Dryopteris fragrans	g__	s__
ASV126689	k__Bacteria	p__Cyanobacteria	c__Cyanobacteriia	o__Chloroplast	f__	g__	s__
ASV126785	k__Bacteria	p__Cyanobacteria	c__Cyanobacteriia	o__Chloroplast	f__	g__	s__
ASV126854	k__Bacteria	p__Cyanobacteria	c__Cyanobacteriia	o__Chloroplast	f__	g__	s__
ASV127438	k__Bacteria	p__Cyanobacteria	c__Cyanobacteriia	o__Chloroplast	f__	g__	s__
ASV127565	k__Bacteria	p__Cyanobacteria	c__Cyanobacteriia	o__Chloroplast	f__	g__	s__
ASV127916	k__Bacteria	p__Cyanobacteria	c__Cyanobacteriia	o__Chloroplast	f__Elliptochloris bilobata	g__	s__
ASV128029	k__Bacteria	p__Cyanobacteria	c__Cyanobacteriia	o__Chloroplast	f__Picea glauca (white spruce)	g__	s__
ASV128086	k__Bacteria	p__Cyanobacteria	c__Cyanobacteriia	o__Chloroplast	f__Planctonema lauterbornii	g__	s__
ASV128093	k__Bacteria	p__Cyanobacteria	c__Cyanobacteriia	o__Chloroplast	f__Nicotiana tabacum (common tobacco)	g__	s__
ASV128425	k__Bacteria	p__Cyanobacteria	c__Cyanobacteriia	o__Chloroplast	f__Picea glauca (white spruce)	g__	s__
ASV128533	k__Bacteria	p__Cyanobacteria	c__Cyanobacteriia	o__Chloroplast	f__	g__	s__
ASV128678	k__Bacteria	p__Cyanobacteria	c__Cyanobacteriia	o__Chloroplast	f__Sanionia uncinata	g__	s__
ASV128706	k__Bacteria	p__Cyanobacteria	c__Cyanobacteriia	o__Chloroplast	f__	g__	s__
ASV129083	k__Bacteria	p__Cyanobacteria	c__Cyanobacteriia	o__Chloroplast	f__	g__	s__
ASV129146	k__Bacteria	p__Cyanobacteria	c__Cyanobacteriia	o__Chloroplast	f__	g__	s__
ASV129319	k__Bacteria	p__Cyanobacteria	c__Cyanobacteriia	o__Chloroplast	f__Bracteacoccus aerius	g__	s__
ASV129384	k__Bacteria	p__Cyanobacteria	c__Cyanobacteriia	o__Chloroplast	f__Nicotiana tabacum (common tobacco)	g__	s__
ASV129456	k__Bacteria	p__Cyanobacteria	c__Cyanobacteriia	o__Chloroplast	f__Sanionia uncinata	g__	s__
ASV129548	k__Bacteria	p__Cyanobacteria	c__Cyanobacteriia	o__Chloroplast	f__Morus indica	g__	s__
ASV129692	k__Bacteria	p__Cyanobacteria	c__Cyanobacteriia	o__Chloroplast	f__Coccomyxa viridis	g__	s__
ASV130079	k__Bacteria	p__Cyanobacteria	c__Cyanobacteriia	o__Chloroplast	f__	g__	s__
ASV130401	k__Bacteria	p__Cyanobacteria	c__Cyanobacteriia	o__Chloroplast	f__	g__	s__
ASV130691	k__Bacteria	p__Cyanobacteria	c__Cyanobacteriia	o__Chloroplast	f__Nyholmiella obtusifolia	g__	s__
ASV130748	k__Bacteria	p__Cyanobacteria	c__Cyanobacteriia	o__Chloroplast	f__	g__	s__
ASV130770	k__Bacteria	p__Cyanobacteria	c__Cyanobacteriia	o__Chloroplast	f__Castanea mollissima (Chinese chestnut)	g__	s__
ASV130838	k__Bacteria	p__Cyanobacteria	c__Cyanobacteriia	o__Chloroplast	f__	g__	s__
ASV131161	k__Bacteria	p__Cyanobacteria	c__Cyanobacteriia	o__Chloroplast	f__Bracteacoccus aerius	g__	s__
ASV131181	k__Bacteria	p__Cyanobacteria	c__Cyanobacteriia	o__Chloroplast	f__Morus indica	g__	s__
ASV131197	k__Bacteria	p__Cyanobacteria	c__Cyanobacteriia	o__Chloroplast	f__	g__	s__
ASV131215	k__Bacteria	p__Cyanobacteria	c__Cyanobacteriia	o__Chloroplast	f__	g__	s__
ASV131217	k__Bacteria	p__Cyanobacteria	c__Cyanobacteriia	o__Chloroplast	f__Nicotiana tabacum (common tobacco)	g__	s__
ASV131375	k__Bacteria	p__Cyanobacteria	c__Cyanobacteriia	o__Chloroplast	f__Nicotiana tabacum (common tobacco)	g__	s__
ASV131415	k__Bacteria	p__Cyanobacteria	c__Cyanobacteriia	o__Chloroplast	f__Morus indica	g__	s__
ASV131548	k__Bacteria	p__Cyanobacteria	c__Cyanobacteriia	o__Chloroplast	f__	g__	s__
ASV132012	k__Bacteria	p__Cyanobacteria	c__Cyanobacteriia	o__Chloroplast	f__	g__	s__
ASV132111	k__Bacteria	p__Cyanobacteria	c__Cyanobacteriia	o__Chloroplast	f__Morus indica	g__	s__
ASV132136	k__Bacteria	p__Cyanobacteria	c__Cyanobacteriia	o__Chloroplast	f__Castanea mollissima (Chinese chestnut)	g__	s__
ASV132536	k__Bacteria	p__Cyanobacteria	c__Cyanobacteriia	o__Chloroplast	f__Mychonastes jurisii	g__	s__
ASV132768	k__Bacteria	p__Cyanobacteria	c__Cyanobacteriia	o__Chloroplast	f__Morus indica	g__	s__
ASV132802	k__Bacteria	p__Cyanobacteria	c__Cyanobacteriia	o__Chloroplast	f__Nicotiana tabacum (common tobacco)	g__	s__
ASV132901	k__Bacteria	p__Cyanobacteria	c__Cyanobacteriia	o__Chloroplast	f__Nicotiana tabacum (common tobacco)	g__	s__
ASV132978	k__Bacteria	p__Cyanobacteria	c__Cyanobacteriia	o__Chloroplast	f__	g__	s__
ASV133044	k__Bacteria	p__Cyanobacteria	c__Cyanobacteriia	o__Chloroplast	f__	g__	s__
ASV133164	k__Bacteria	p__Cyanobacteria	c__Cyanobacteriia	o__Chloroplast	f__Cyclotella sp. L04_2	g__	s__
ASV133190	k__Bacteria	p__Cyanobacteria	c__Cyanobacteriia	o__Chloroplast	f__	g__	s__
ASV133207	k__Bacteria	p__Cyanobacteria	c__Cyanobacteriia	o__Chloroplast	f__	g__	s__
ASV133296	k__Bacteria	p__Cyanobacteria	c__Cyanobacteriia	o__Chloroplast	f__Symbiochloris handae	g__	s__
ASV133435	k__Bacteria	p__Cyanobacteria	c__Cyanobacteriia	o__Chloroplast	f__Gossypium arboreum	g__	s__
ASV133589	k__Bacteria	p__Cyanobacteria	c__Cyanobacteriia	o__Chloroplast	f__Picea glauca (white spruce)	g__	s__
ASV133708	k__Bacteria	p__Cyanobacteria	c__Cyanobacteriia	o__Chloroplast	f__	g__	s__
ASV133715	k__Bacteria	p__Cyanobacteria	c__Cyanobacteriia	o__Chloroplast	f__Coccomyxa viridis	g__	s__
ASV133790	k__Bacteria	p__Cyanobacteria	c__Cyanobacteriia	o__Chloroplast	f__	g__	s__
ASV133801	k__Bacteria	p__Cyanobacteria	c__Cyanobacteriia	o__Chloroplast	f__Elliptochloris bilobata	g__	s__
ASV133908	k__Bacteria	p__Cyanobacteria	c__Cyanobacteriia	o__Chloroplast	f__Morus indica	g__	s__
ASV133917	k__Bacteria	p__Cyanobacteria	c__Cyanobacteriia	o__Chloroplast	f__Picea glauca (white spruce)	g__	s__
ASV133955	k__Bacteria	p__Cyanobacteria	c__Cyanobacteriia	o__Chloroplast	f__	g__	s__
ASV133971	k__Bacteria	p__Cyanobacteria	c__Cyanobacteriia	o__Chloroplast	f__	g__	s__
ASV134477	k__Bacteria	p__Cyanobacteria	c__Cyanobacteriia	o__Chloroplast	f__Nyholmiella obtusifolia	g__	s__
ASV134545	k__Bacteria	p__Cyanobacteria	c__Cyanobacteriia	o__Chloroplast	f__Coccomyxa viridis	g__	s__
ASV134645	k__Bacteria	p__Cyanobacteria	c__Cyanobacteriia	o__Chloroplast	f__Dryopteris fragrans	g__	s__
ASV134766	k__Bacteria	p__Cyanobacteria	c__Cyanobacteriia	o__Chloroplast	f__Morus indica	g__	s__
ASV134852	k__Bacteria	p__Cyanobacteria	c__Cyanobacteriia	o__Chloroplast	f__Coccomyxa viridis	g__	s__
ASV134855	k__Bacteria	p__Cyanobacteria	c__Cyanobacteriia	o__Chloroplast	f__Hydra vulgaris	g__	s__
ASV135100	k__Bacteria	p__Cyanobacteria	c__Cyanobacteriia	o__Chloroplast	f__Morus indica	g__	s__
ASV135222	k__Bacteria	p__Cyanobacteria	c__Cyanobacteriia	o__Chloroplast	f__Morus indica	g__	s__
ASV135295	k__Bacteria	p__Cyanobacteria	c__Cyanobacteriia	o__Chloroplast	f__Hydra vulgaris	g__	s__
ASV135408	k__Bacteria	p__Cyanobacteria	c__Cyanobacteriia	o__Chloroplast	f__Morus indica	g__	s__
ASV135410	k__Bacteria	p__Cyanobacteria	c__Cyanobacteriia	o__Chloroplast	f__Nicotiana tabacum (common tobacco)	g__	s__
ASV135580	k__Bacteria	p__Cyanobacteria	c__Cyanobacteriia	o__Chloroplast	f__Morus indica	g__	s__
ASV135846	k__Bacteria	p__Cyanobacteria	c__Cyanobacteriia	o__Chloroplast	f__Morus indica	g__	s__
ASV135915	k__Bacteria	p__Cyanobacteria	c__Cyanobacteriia	o__Chloroplast	f__Nicotiana tabacum (common tobacco)	g__	s__
ASV135969	k__Bacteria	p__Cyanobacteria	c__Cyanobacteriia	o__Chloroplast	f__	g__	s__
ASV136091	k__Bacteria	p__Cyanobacteria	c__Cyanobacteriia	o__Chloroplast	f__Morus indica	g__	s__
ASV136128	k__Bacteria	p__Cyanobacteria	c__Cyanobacteriia	o__Chloroplast	f__	g__	s__
ASV136247	k__Bacteria	p__Cyanobacteria	c__Cyanobacteriia	o__Chloroplast	f__Chlorosarcina brevispinosa	g__	s__
ASV136368	k__Bacteria	p__Cyanobacteria	c__Cyanobacteriia	o__Chloroplast	f__Morus indica	g__	s__
ASV136404	k__Bacteria	p__Cyanobacteria	c__Cyanobacteriia	o__Chloroplast	f__Morus indica	g__	s__
ASV136514	k__Bacteria	p__Cyanobacteria	c__Cyanobacteriia	o__Chloroplast	f__	g__	s__
ASV136728	k__Bacteria	p__Cyanobacteria	c__Cyanobacteriia	o__Chloroplast	f__	g__	s__
ASV137225	k__Bacteria	p__Cyanobacteria	c__Cyanobacteriia	o__Chloroplast	f__Morus indica	g__	s__
ASV137243	k__Bacteria	p__Cyanobacteria	c__Cyanobacteriia	o__Chloroplast	f__Nicotiana tabacum (common tobacco)	g__	s__
ASV137417	k__Bacteria	p__Cyanobacteria	c__Cyanobacteriia	o__Chloroplast	f__	g__	s__
ASV137554	k__Bacteria	p__Cyanobacteria	c__Cyanobacteriia	o__Chloroplast	f__Nicotiana tabacum (common tobacco)	g__	s__
ASV137605	k__Bacteria	p__Cyanobacteria	c__Cyanobacteriia	o__Chloroplast	f__Morus indica	g__	s__
ASV137632	k__Bacteria	p__Cyanobacteria	c__Cyanobacteriia	o__Chloroplast	f__	g__	s__
ASV137847	k__Bacteria	p__Cyanobacteria	c__Cyanobacteriia	o__Chloroplast	f__	g__	s__
ASV137853	k__Bacteria	p__Cyanobacteria	c__Cyanobacteriia	o__Chloroplast	f__Paradoxia multiseta	g__	s__
ASV138025	k__Bacteria	p__Cyanobacteria	c__Cyanobacteriia	o__Chloroplast	f__	g__	s__
ASV138043	k__Bacteria	p__Cyanobacteria	c__Cyanobacteriia	o__Chloroplast	f__Nicotiana tabacum (common tobacco)	g__	s__
ASV138718	k__Bacteria	p__Cyanobacteria	c__Cyanobacteriia	o__Chloroplast	f__	g__	s__
ASV138960	k__Bacteria	p__Cyanobacteria	c__Cyanobacteriia	o__Chloroplast	f__Nicotiana tabacum (common tobacco)	g__	s__
ASV139004	k__Bacteria	p__Cyanobacteria	c__Cyanobacteriia	o__Chloroplast	f__Morus indica	g__	s__
ASV139228	k__Bacteria	p__Cyanobacteria	c__Cyanobacteriia	o__Chloroplast	f__Vaccinium macrocarpon	g__	s__
ASV139246	k__Bacteria	p__Cyanobacteria	c__Cyanobacteriia	o__Chloroplast	f__Picea glauca (white spruce)	g__	s__
ASV139259	k__Bacteria	p__Cyanobacteria	c__Cyanobacteriia	o__Chloroplast	f__Coccomyxa viridis	g__	s__
ASV139324	k__Bacteria	p__Cyanobacteria	c__Cyanobacteriia	o__Chloroplast	f__Symbiochloris handae	g__	s__
ASV139330	k__Bacteria	p__Cyanobacteria	c__Cyanobacteriia	o__Chloroplast	f__Picea glauca (white spruce)	g__	s__
ASV139668	k__Bacteria	p__Cyanobacteria	c__Cyanobacteriia	o__Chloroplast	f__Hydra vulgaris	g__	s__
ASV139793	k__Bacteria	p__Cyanobacteria	c__Cyanobacteriia	o__Chloroplast	f__	g__	s__
ASV139903	k__Bacteria	p__Cyanobacteria	c__Cyanobacteriia	o__Chloroplast	f__Morus indica	g__	s__
ASV140190	k__Bacteria	p__Cyanobacteria	c__Cyanobacteriia	o__Chloroplast	f__Morus indica	g__	s__
ASV140295	k__Bacteria	p__Cyanobacteria	c__Cyanobacteriia	o__Chloroplast	f__Nicotiana tabacum (common tobacco)	g__	s__
ASV140399	k__Bacteria	p__Cyanobacteria	c__Cyanobacteriia	o__Chloroplast	f__Koliella longiseta	g__	s__
ASV140439	k__Bacteria	p__Cyanobacteria	c__Cyanobacteriia	o__Chloroplast	f__Picea glauca (white spruce)	g__	s__
ASV140466	k__Bacteria	p__Cyanobacteria	c__Cyanobacteriia	o__Chloroplast	f__	g__	s__
ASV140585	k__Bacteria	p__Cyanobacteria	c__Cyanobacteriia	o__Chloroplast	f__Coccomyxa simplex	g__	s__
ASV140894	k__Bacteria	p__Cyanobacteria	c__Cyanobacteriia	o__Chloroplast	f__Morus indica	g__	s__
ASV141201	k__Bacteria	p__Cyanobacteria	c__Cyanobacteriia	o__Chloroplast	f__	g__	s__
ASV141260	k__Bacteria	p__Cyanobacteria	c__Cyanobacteriia	o__Chloroplast	f__	g__	s__
ASV141268	k__Bacteria	p__Cyanobacteria	c__Cyanobacteriia	o__Chloroplast	f__Picea glauca (white spruce)	g__	s__
ASV141335	k__Bacteria	p__Cyanobacteria	c__Cyanobacteriia	o__Chloroplast	f__Morus indica	g__	s__
ASV141352	k__Bacteria	p__Cyanobacteria	c__Cyanobacteriia	o__Chloroplast	f__Hydra vulgaris	g__	s__
ASV141567	k__Bacteria	p__Cyanobacteria	c__Cyanobacteriia	o__Chloroplast	f__Coccomyxa viridis	g__	s__
ASV141782	k__Bacteria	p__Cyanobacteria	c__Cyanobacteriia	o__Chloroplast	f__Nicotiana tabacum (common tobacco)	g__	s__
ASV142001	k__Bacteria	p__Cyanobacteria	c__Cyanobacteriia	o__Chloroplast	f__Symbiochloris handae	g__	s__
ASV142150	k__Bacteria	p__Cyanobacteria	c__Cyanobacteriia	o__Chloroplast	f__Dryopteris fragrans	g__	s__
ASV142217	k__Bacteria	p__Cyanobacteria	c__Cyanobacteriia	o__Chloroplast	f__Eimeria praecox	g__	s__
ASV142218	k__Bacteria	p__Cyanobacteria	c__Cyanobacteriia	o__Chloroplast	f__	g__	s__
ASV142275	k__Bacteria	p__Cyanobacteria	c__Cyanobacteriia	o__Chloroplast	f__Hydra vulgaris	g__	s__
ASV142289	k__Bacteria	p__Cyanobacteria	c__Cyanobacteriia	o__Chloroplast	f__	g__	s__
ASV142393	k__Bacteria	p__Cyanobacteria	c__Cyanobacteriia	o__Chloroplast	f__Dryopteris fragrans	g__	s__
ASV142420	k__Bacteria	p__Cyanobacteria	c__Cyanobacteriia	o__Chloroplast	f__	g__	s__
ASV142555	k__Bacteria	p__Cyanobacteria	c__Cyanobacteriia	o__Chloroplast	f__Elliptochloris bilobata	g__	s__
ASV142589	k__Bacteria	p__Cyanobacteria	c__Cyanobacteriia	o__Chloroplast	f__Betula pendula (European white birch)	g__	s__
ASV142759	k__Bacteria	p__Cyanobacteria	c__Cyanobacteriia	o__Chloroplast	f__Morus indica	g__	s__
ASV142835	k__Bacteria	p__Cyanobacteria	c__Cyanobacteriia	o__Chloroplast	f__Hydra vulgaris	g__	s__
ASV143044	k__Bacteria	p__Cyanobacteria	c__Cyanobacteriia	o__Chloroplast	f__	g__	s__
ASV143103	k__Bacteria	p__Cyanobacteria	c__Cyanobacteriia	o__Chloroplast	f__	g__	s__
ASV143423	k__Bacteria	p__Cyanobacteria	c__Cyanobacteriia	o__Chloroplast	f__	g__	s__
ASV143648	k__Bacteria	p__Cyanobacteria	c__Cyanobacteriia	o__Chloroplast	f__Castanea mollissima (Chinese chestnut)	g__	s__
ASV143739	k__Bacteria	p__Cyanobacteria	c__Cyanobacteriia	o__Chloroplast	f__Picea glauca (white spruce)	g__	s__
ASV143806	k__Bacteria	p__Cyanobacteria	c__Cyanobacteriia	o__Chloroplast	f__Bracteacoccus minor	g__	s__
ASV143949	k__Bacteria	p__Cyanobacteria	c__Cyanobacteriia	o__Chloroplast	f__Morus indica	g__	s__
ASV144158	k__Bacteria	p__Cyanobacteria	c__Cyanobacteriia	o__Chloroplast	f__Sphagnum angustifolium	g__	s__
ASV144223	k__Bacteria	p__Cyanobacteria	c__Cyanobacteriia	o__Chloroplast	f__Picea glauca (white spruce)	g__	s__
ASV144373	k__Bacteria	p__Cyanobacteria	c__Cyanobacteriia	o__Chloroplast	f__Nicotiana tabacum (common tobacco)	g__	s__
ASV145044	k__Bacteria	p__Cyanobacteria	c__Cyanobacteriia	o__Chloroplast	f__Morus indica	g__	s__
ASV145162	k__Bacteria	p__Cyanobacteria	c__Cyanobacteriia	o__Chloroplast	f__	g__	s__
ASV145179	k__Bacteria	p__Cyanobacteria	c__Cyanobacteriia	o__Chloroplast	f__Coccomyxa simplex	g__	s__
ASV145313	k__Bacteria	p__Cyanobacteria	c__Cyanobacteriia	o__Chloroplast	f__Morus indica	g__	s__
ASV145540	k__Bacteria	p__Cyanobacteria	c__Cyanobacteriia	o__Chloroplast	f__	g__	s__
ASV145581	k__Bacteria	p__Cyanobacteria	c__Cyanobacteriia	o__Chloroplast	f__	g__	s__
ASV145711	k__Bacteria	p__Cyanobacteria	c__Cyanobacteriia	o__Chloroplast	f__Betula pendula (European white birch)	g__	s__
ASV145761	k__Bacteria	p__Cyanobacteria	c__Cyanobacteriia	o__Chloroplast	f__	g__	s__
ASV145937	k__Bacteria	p__Cyanobacteria	c__Cyanobacteriia	o__Chloroplast	f__Morus indica	g__	s__
ASV146029	k__Bacteria	p__Cyanobacteria	c__Cyanobacteriia	o__Chloroplast	f__	g__	s__
ASV146099	k__Bacteria	p__Cyanobacteria	c__Cyanobacteriia	o__Chloroplast	f__	g__	s__
ASV146199	k__Bacteria	p__Cyanobacteria	c__Cyanobacteriia	o__Chloroplast	f__	g__	s__
ASV146436	k__Bacteria	p__Cyanobacteria	c__Cyanobacteriia	o__Chloroplast	f__Hydra vulgaris	g__	s__
ASV146565	k__Bacteria	p__Cyanobacteria	c__Cyanobacteriia	o__Chloroplast	f__Morus indica	g__	s__
ASV146673	k__Bacteria	p__Cyanobacteria	c__Cyanobacteriia	o__Chloroplast	f__	g__	s__
ASV146808	k__Bacteria	p__Cyanobacteria	c__Cyanobacteriia	o__Chloroplast	f__Chlorella pyrenoidosa	g__	s__
ASV146895	k__Bacteria	p__Cyanobacteria	c__Cyanobacteriia	o__Chloroplast	f__Vaccinium macrocarpon	g__	s__
ASV147248	k__Bacteria	p__Cyanobacteria	c__Cyanobacteriia	o__Chloroplast	f__Castanea mollissima (Chinese chestnut)	g__	s__
ASV147523	k__Bacteria	p__Cyanobacteria	c__Cyanobacteriia	o__Chloroplast	f__Hydra vulgaris	g__	s__
ASV147584	k__Bacteria	p__Cyanobacteria	c__Cyanobacteriia	o__Chloroplast	f__Morus indica	g__	s__
ASV147722	k__Bacteria	p__Cyanobacteria	c__Cyanobacteriia	o__Chloroplast	f__Dryopteris fragrans	g__	s__
ASV147899	k__Bacteria	p__Cyanobacteria	c__Cyanobacteriia	o__Chloroplast	f__Betula pendula (European white birch)	g__	s__
ASV148142	k__Bacteria	p__Cyanobacteria	c__Cyanobacteriia	o__Chloroplast	f__	g__	s__
ASV148249	k__Bacteria	p__Cyanobacteria	c__Cyanobacteriia	o__Chloroplast	f__Picea glauca (white spruce)	g__	s__
ASV148424	k__Bacteria	p__Cyanobacteria	c__Cyanobacteriia	o__Chloroplast	f__Picea glauca (white spruce)	g__	s__
ASV148468	k__Bacteria	p__Cyanobacteria	c__Cyanobacteriia	o__Chloroplast	f__	g__	s__
ASV148608	k__Bacteria	p__Cyanobacteria	c__Cyanobacteriia	o__Chloroplast	f__Morus indica	g__	s__
ASV148828	k__Bacteria	p__Cyanobacteria	c__Cyanobacteriia	o__Chloroplast	f__Nicotiana tabacum (common tobacco)	g__	s__
ASV148895	k__Bacteria	p__Cyanobacteria	c__Cyanobacteriia	o__Chloroplast	f__	g__	s__
ASV148928	k__Bacteria	p__Cyanobacteria	c__Cyanobacteriia	o__Chloroplast	f__	g__	s__
ASV149009	k__Bacteria	p__Cyanobacteria	c__Cyanobacteriia	o__Chloroplast	f__	g__	s__
ASV149063	k__Bacteria	p__Cyanobacteria	c__Cyanobacteriia	o__Chloroplast	f__Picea glauca (white spruce)	g__	s__
ASV149168	k__Bacteria	p__Cyanobacteria	c__Cyanobacteriia	o__Chloroplast	f__Gossypium arboreum	g__	s__
ASV149465	k__Bacteria	p__Cyanobacteria	c__Cyanobacteriia	o__Chloroplast	f__Morus indica	g__	s__
ASV149492	k__Bacteria	p__Cyanobacteria	c__Cyanobacteriia	o__Chloroplast	f__	g__	s__
ASV149945	k__Bacteria	p__Cyanobacteria	c__Cyanobacteriia	o__Chloroplast	f__Castanea mollissima (Chinese chestnut)	g__	s__
ASV149980	k__Bacteria	p__Cyanobacteria	c__Cyanobacteriia	o__Chloroplast	f__Amborella trichopoda	g__	s__
ASV150103	k__Bacteria	p__Cyanobacteria	c__Cyanobacteriia	o__Chloroplast	f__	g__	s__
ASV150153	k__Bacteria	p__Cyanobacteria	c__Cyanobacteriia	o__Chloroplast	f__Morus indica	g__	s__
ASV150422	k__Bacteria	p__Cyanobacteria	c__Cyanobacteriia	o__Chloroplast	f__Nicotiana tabacum (common tobacco)	g__	s__
ASV150500	k__Bacteria	p__Cyanobacteria	c__Cyanobacteriia	o__Chloroplast	f__	g__	s__
ASV150550	k__Bacteria	p__Cyanobacteria	c__Cyanobacteriia	o__Chloroplast	f__Hydra vulgaris	g__	s__
ASV150646	k__Bacteria	p__Cyanobacteria	c__Cyanobacteriia	o__Chloroplast	f__Hydra vulgaris	g__	s__
ASV150760	k__Bacteria	p__Cyanobacteria	c__Cyanobacteriia	o__Chloroplast	f__Nicotiana tabacum (common tobacco)	g__	s__
ASV150804	k__Bacteria	p__Cyanobacteria	c__Cyanobacteriia	o__Chloroplast	f__Castanea mollissima (Chinese chestnut)	g__	s__
ASV151219	k__Bacteria	p__Cyanobacteria	c__Cyanobacteriia	o__Chloroplast	f__	g__	s__
ASV151295	k__Bacteria	p__Cyanobacteria	c__Cyanobacteriia	o__Chloroplast	f__Nicotiana tabacum (common tobacco)	g__	s__
ASV151376	k__Bacteria	p__Cyanobacteria	c__Cyanobacteriia	o__Chloroplast	f__	g__	s__
ASV151594	k__Bacteria	p__Cyanobacteria	c__Cyanobacteriia	o__Chloroplast	f__Morus indica	g__	s__
ASV151635	k__Bacteria	p__Cyanobacteria	c__Cyanobacteriia	o__Chloroplast	f__	g__	s__
ASV151740	k__Bacteria	p__Cyanobacteria	c__Cyanobacteriia	o__Chloroplast	f__Picea glauca (white spruce)	g__	s__
ASV151776	k__Bacteria	p__Cyanobacteria	c__Cyanobacteriia	o__Chloroplast	f__Nicotiana tabacum (common tobacco)	g__	s__
ASV151780	k__Bacteria	p__Cyanobacteria	c__Cyanobacteriia	o__Chloroplast	f__	g__	s__
ASV151793	k__Bacteria	p__Cyanobacteria	c__Cyanobacteriia	o__Chloroplast	f__Dryopteris fragrans	g__	s__
ASV151978	k__Bacteria	p__Cyanobacteria	c__Cyanobacteriia	o__Chloroplast	f__Lotus corniculatus	g__	s__
ASV152025	k__Bacteria	p__Cyanobacteria	c__Cyanobacteriia	o__Chloroplast	f__Elliptochloris bilobata	g__	s__
ASV152190	k__Bacteria	p__Cyanobacteria	c__Cyanobacteriia	o__Chloroplast	f__Watanabea reniformis	g__	s__
ASV152212	k__Bacteria	p__Cyanobacteria	c__Cyanobacteriia	o__Chloroplast	f__Morus indica	g__	s__
ASV152321	k__Bacteria	p__Cyanobacteria	c__Cyanobacteriia	o__Chloroplast	f__Betula pendula (European white birch)	g__	s__
ASV152464	k__Bacteria	p__Cyanobacteria	c__Cyanobacteriia	o__Chloroplast	f__	g__	s__
ASV152488	k__Bacteria	p__Cyanobacteria	c__Cyanobacteriia	o__Chloroplast	f__Morus indica	g__	s__
ASV152543	k__Bacteria	p__Cyanobacteria	c__Cyanobacteriia	o__Chloroplast	f__Morus indica	g__	s__
ASV152570	k__Bacteria	p__Cyanobacteria	c__Cyanobacteriia	o__Chloroplast	f__	g__	s__
ASV152599	k__Bacteria	p__Cyanobacteria	c__Cyanobacteriia	o__Chloroplast	f__Nicotiana tabacum (common tobacco)	g__	s__
ASV152777	k__Bacteria	p__Cyanobacteria	c__Cyanobacteriia	o__Chloroplast	f__Morus indica	g__	s__
ASV152958	k__Bacteria	p__Cyanobacteria	c__Cyanobacteriia	o__Chloroplast	f__Morus indica	g__	s__
ASV153028	k__Bacteria	p__Cyanobacteria	c__Cyanobacteriia	o__Chloroplast	f__Dryopteris fragrans	g__	s__
ASV153275	k__Bacteria	p__Cyanobacteria	c__Cyanobacteriia	o__Chloroplast	f__Morus indica	g__	s__
ASV153421	k__Bacteria	p__Cyanobacteria	c__Cyanobacteriia	o__Chloroplast	f__Hydra vulgaris	g__	s__
ASV153456	k__Bacteria	p__Cyanobacteria	c__Cyanobacteriia	o__Chloroplast	f__Coccomyxa viridis	g__	s__
ASV153647	k__Bacteria	p__Cyanobacteria	c__Cyanobacteriia	o__Chloroplast	f__	g__	s__
ASV153668	k__Bacteria	p__Cyanobacteria	c__Cyanobacteriia	o__Chloroplast	f__Castanea mollissima (Chinese chestnut)	g__	s__
ASV153701	k__Bacteria	p__Cyanobacteria	c__Cyanobacteriia	o__Chloroplast	f__	g__	s__
ASV153726	k__Bacteria	p__Cyanobacteria	c__Cyanobacteriia	o__Chloroplast	f__	g__	s__
ASV153777	k__Bacteria	p__Cyanobacteria	c__Cyanobacteriia	o__Chloroplast	f__	g__	s__
ASV153840	k__Bacteria	p__Cyanobacteria	c__Cyanobacteriia	o__Chloroplast	f__Nicotiana tabacum (common tobacco)	g__	s__
ASV153898	k__Bacteria	p__Cyanobacteria	c__Cyanobacteriia	o__Chloroplast	f__	g__	s__
ASV153947	k__Bacteria	p__Cyanobacteria	c__Cyanobacteriia	o__Chloroplast	f__	g__	s__
ASV154070	k__Bacteria	p__Cyanobacteria	c__Cyanobacteriia	o__Chloroplast	f__	g__	s__
ASV154201	k__Bacteria	p__Cyanobacteria	c__Cyanobacteriia	o__Chloroplast	f__Symbiochloris handae	g__	s__
ASV154478	k__Bacteria	p__Cyanobacteria	c__Cyanobacteriia	o__Chloroplast	f__Elliptochloris bilobata	g__	s__
ASV154578	k__Bacteria	p__Cyanobacteria	c__Cyanobacteriia	o__Chloroplast	f__Cyclotella sp. L04_2	g__	s__
ASV154616	k__Bacteria	p__Cyanobacteria	c__Cyanobacteriia	o__Chloroplast	f__	g__	s__
ASV154781	k__Bacteria	p__Cyanobacteria	c__Cyanobacteriia	o__Chloroplast	f__Sanionia uncinata	g__	s__
ASV154831	k__Bacteria	p__Cyanobacteria	c__Cyanobacteriia	o__Chloroplast	f__	g__	s__
ASV155033	k__Bacteria	p__Cyanobacteria	c__Cyanobacteriia	o__Chloroplast	f__	g__	s__
ASV155039	k__Bacteria	p__Cyanobacteria	c__Cyanobacteriia	o__Chloroplast	f__Vaccinium macrocarpon	g__	s__
ASV155181	k__Bacteria	p__Cyanobacteria	c__Cyanobacteriia	o__Chloroplast	f__Morus indica	g__	s__
ASV155568	k__Bacteria	p__Cyanobacteria	c__Cyanobacteriia	o__Chloroplast	f__Morus indica	g__	s__
ASV155745	k__Bacteria	p__Cyanobacteria	c__Cyanobacteriia	o__Chloroplast	f__Morus indica	g__	s__
ASV156008	k__Bacteria	p__Cyanobacteria	c__Cyanobacteriia	o__Chloroplast	f__Hydra vulgaris	g__	s__
ASV156062	k__Bacteria	p__Cyanobacteria	c__Cyanobacteriia	o__Chloroplast	f__Dryopteris fragrans	g__	s__
ASV156086	k__Bacteria	p__Cyanobacteria	c__Cyanobacteriia	o__Chloroplast	f__Morus indica	g__	s__
ASV156224	k__Bacteria	p__Cyanobacteria	c__Cyanobacteriia	o__Chloroplast	f__Dryopteris fragrans	g__	s__
ASV156333	k__Bacteria	p__Cyanobacteria	c__Cyanobacteriia	o__Chloroplast	f__	g__	s__
ASV156420	k__Bacteria	p__Cyanobacteria	c__Cyanobacteriia	o__Chloroplast	f__Morus indica	g__	s__
ASV156452	k__Bacteria	p__Cyanobacteria	c__Cyanobacteriia	o__Chloroplast	f__Morus indica	g__	s__
ASV156711	k__Bacteria	p__Cyanobacteria	c__Cyanobacteriia	o__Chloroplast	f__	g__	s__
ASV156934	k__Bacteria	p__Cyanobacteria	c__Cyanobacteriia	o__Chloroplast	f__Morus indica	g__	s__
ASV156951	k__Bacteria	p__Cyanobacteria	c__Cyanobacteriia	o__Chloroplast	f__	g__	s__
ASV156965	k__Bacteria	p__Cyanobacteria	c__Cyanobacteriia	o__Chloroplast	f__	g__	s__
ASV157257	k__Bacteria	p__Cyanobacteria	c__Cyanobacteriia	o__Chloroplast	f__Morus indica	g__	s__
ASV157366	k__Bacteria	p__Cyanobacteria	c__Cyanobacteriia	o__Chloroplast	f__	g__	s__
ASV157663	k__Bacteria	p__Cyanobacteria	c__Cyanobacteriia	o__Chloroplast	f__	g__	s__
ASV157685	k__Bacteria	p__Cyanobacteria	c__Cyanobacteriia	o__Chloroplast	f__Nicotiana tabacum (common tobacco)	g__	s__
ASV157813	k__Bacteria	p__Cyanobacteria	c__Cyanobacteriia	o__Chloroplast	f__Elliptochloris bilobata	g__	s__
ASV157883	k__Bacteria	p__Cyanobacteria	c__Cyanobacteriia	o__Chloroplast	f__	g__	s__
ASV158161	k__Bacteria	p__Cyanobacteria	c__Cyanobacteriia	o__Chloroplast	f__Morus indica	g__	s__
ASV158234	k__Bacteria	p__Cyanobacteria	c__Cyanobacteriia	o__Chloroplast	f__Morus indica	g__	s__
ASV158258	k__Bacteria	p__Cyanobacteria	c__Cyanobacteriia	o__Chloroplast	f__Morus indica	g__	s__
ASV158297	k__Bacteria	p__Cyanobacteria	c__Cyanobacteriia	o__Chloroplast	f__Coccomyxa viridis	g__	s__
ASV158332	k__Bacteria	p__Cyanobacteria	c__Cyanobacteriia	o__Chloroplast	f__	g__	s__
ASV158341	k__Bacteria	p__Cyanobacteria	c__Cyanobacteriia	o__Chloroplast	f__	g__	s__
ASV158400	k__Bacteria	p__Cyanobacteria	c__Cyanobacteriia	o__Chloroplast	f__Cylindrocystis brebissonii	g__	s__
ASV158466	k__Bacteria	p__Cyanobacteria	c__Cyanobacteriia	o__Chloroplast	f__Nicotiana tabacum (common tobacco)	g__	s__
ASV158546	k__Bacteria	p__Cyanobacteria	c__Cyanobacteriia	o__Chloroplast	f__	g__	s__
ASV158602	k__Bacteria	p__Cyanobacteria	c__Cyanobacteriia	o__Chloroplast	f__Chlorella pyrenoidosa	g__	s__
ASV158907	k__Bacteria	p__Cyanobacteria	c__Cyanobacteriia	o__Chloroplast	f__Dryopteris fragrans	g__	s__
ASV158927	k__Bacteria	p__Cyanobacteria	c__Cyanobacteriia	o__Chloroplast	f__	g__	s__
ASV158938	k__Bacteria	p__Cyanobacteria	c__Cyanobacteriia	o__Chloroplast	f__	g__	s__
ASV158941	k__Bacteria	p__Cyanobacteria	c__Cyanobacteriia	o__Chloroplast	f__	g__	s__
ASV158966	k__Bacteria	p__Cyanobacteria	c__Cyanobacteriia	o__Chloroplast	f__Stegnogramma sagittifolia	g__	s__
ASV159597	k__Bacteria	p__Cyanobacteria	c__Cyanobacteriia	o__Chloroplast	f__	g__	s__
ASV159644	k__Bacteria	p__Cyanobacteria	c__Cyanobacteriia	o__Chloroplast	f__	g__	s__
ASV159672	k__Bacteria	p__Cyanobacteria	c__Cyanobacteriia	o__Chloroplast	f__Nicotiana tabacum (common tobacco)	g__	s__
ASV159741	k__Bacteria	p__Cyanobacteria	c__Cyanobacteriia	o__Chloroplast	f__Elliptochloris bilobata	g__	s__
ASV159791	k__Bacteria	p__Cyanobacteria	c__Cyanobacteriia	o__Chloroplast	f__	g__	s__
ASV159823	k__Bacteria	p__Cyanobacteria	c__Cyanobacteriia	o__Chloroplast	f__Morus indica	g__	s__
ASV160007	k__Bacteria	p__Cyanobacteria	c__Cyanobacteriia	o__Chloroplast	f__Symbiochloris handae	g__	s__
ASV160306	k__Bacteria	p__Cyanobacteria	c__Cyanobacteriia	o__Chloroplast	f__Klebsormidium nitens	g__	s__
ASV160381	k__Bacteria	p__Cyanobacteria	c__Cyanobacteriia	o__Chloroplast	f__Morus indica	g__	s__
ASV160424	k__Bacteria	p__Cyanobacteria	c__Cyanobacteriia	o__Chloroplast	f__Coccomyxa viridis	g__	s__
ASV160566	k__Bacteria	p__Cyanobacteria	c__Cyanobacteriia	o__Chloroplast	f__Nicotiana tabacum (common tobacco)	g__	s__
ASV160706	k__Bacteria	p__Cyanobacteria	c__Cyanobacteriia	o__Chloroplast	f__	g__	s__
ASV160745	k__Bacteria	p__Cyanobacteria	c__Cyanobacteriia	o__Chloroplast	f__Hydra vulgaris	g__	s__
ASV160748	k__Bacteria	p__Cyanobacteria	c__Cyanobacteriia	o__Chloroplast	f__	g__	s__
ASV160973	k__Bacteria	p__Cyanobacteria	c__Cyanobacteriia	o__Chloroplast	f__	g__	s__
ASV161092	k__Bacteria	p__Cyanobacteria	c__Cyanobacteriia	o__Chloroplast	f__	g__	s__
ASV161242	k__Bacteria	p__Cyanobacteria	c__Cyanobacteriia	o__Chloroplast	f__Vaccinium macrocarpon	g__	s__
ASV161365	k__Bacteria	p__Cyanobacteria	c__Cyanobacteriia	o__Chloroplast	f__Hydra vulgaris	g__	s__
ASV161552	k__Bacteria	p__Cyanobacteria	c__Cyanobacteriia	o__Chloroplast	f__Nicotiana tabacum (common tobacco)	g__	s__
ASV161823	k__Bacteria	p__Cyanobacteria	c__Cyanobacteriia	o__Chloroplast	f__Picea glauca (white spruce)	g__	s__
ASV162109	k__Bacteria	p__Cyanobacteria	c__Cyanobacteriia	o__Chloroplast	f__	g__	s__
ASV162204	k__Bacteria	p__Cyanobacteria	c__Cyanobacteriia	o__Chloroplast	f__	g__	s__
ASV162449	k__Bacteria	p__Cyanobacteria	c__Cyanobacteriia	o__Chloroplast	f__Morus indica	g__	s__
ASV162688	k__Bacteria	p__Cyanobacteria	c__Cyanobacteriia	o__Chloroplast	f__Hydra vulgaris	g__	s__
ASV163147	k__Bacteria	p__Cyanobacteria	c__Cyanobacteriia	o__Chloroplast	f__	g__	s__
ASV163218	k__Bacteria	p__Cyanobacteria	c__Cyanobacteriia	o__Chloroplast	f__Morus indica	g__	s__
ASV163224	k__Bacteria	p__Cyanobacteria	c__Cyanobacteriia	o__Chloroplast	f__	g__	s__
ASV163275	k__Bacteria	p__Cyanobacteria	c__Cyanobacteriia	o__Chloroplast	f__Morus indica	g__	s__
ASV163303	k__Bacteria	p__Cyanobacteria	c__Cyanobacteriia	o__Chloroplast	f__Hydra vulgaris	g__	s__
ASV163376	k__Bacteria	p__Cyanobacteria	c__Cyanobacteriia	o__Chloroplast	f__Dryopteris fragrans	g__	s__
ASV163485	k__Bacteria	p__Cyanobacteria	c__Cyanobacteriia	o__Chloroplast	f__	g__	s__
ASV163816	k__Bacteria	p__Cyanobacteria	c__Cyanobacteriia	o__Chloroplast	f__Nicotiana tabacum (common tobacco)	g__	s__
ASV164028	k__Bacteria	p__Cyanobacteria	c__Cyanobacteriia	o__Chloroplast	f__Coccomyxa viridis	g__	s__
ASV164058	k__Bacteria	p__Cyanobacteria	c__Cyanobacteriia	o__Chloroplast	f__Morus indica	g__	s__
ASV164105	k__Bacteria	p__Cyanobacteria	c__Cyanobacteriia	o__Chloroplast	f__Morus indica	g__	s__
ASV164604	k__Bacteria	p__Cyanobacteria	c__Cyanobacteriia	o__Chloroplast	f__Coccomyxa viridis	g__	s__
ASV164628	k__Bacteria	p__Cyanobacteria	c__Cyanobacteriia	o__Chloroplast	f__Sanionia uncinata	g__	s__
ASV164783	k__Bacteria	p__Cyanobacteria	c__Cyanobacteriia	o__Chloroplast	f__	g__	s__
ASV164927	k__Bacteria	p__Cyanobacteria	c__Cyanobacteriia	o__Chloroplast	f__Morus indica	g__	s__
ASV165014	k__Bacteria	p__Cyanobacteria	c__Cyanobacteriia	o__Chloroplast	f__	g__	s__
ASV165170	k__Bacteria	p__Cyanobacteria	c__Cyanobacteriia	o__Chloroplast	f__	g__	s__
ASV165361	k__Bacteria	p__Cyanobacteria	c__Cyanobacteriia	o__Chloroplast	f__Klebsormidium nitens	g__	s__
ASV165600	k__Bacteria	p__Cyanobacteria	c__Cyanobacteriia	o__Chloroplast	f__Morus indica	g__	s__
ASV165612	k__Bacteria	p__Cyanobacteria	c__Cyanobacteriia	o__Chloroplast	f__Hydra vulgaris	g__	s__
ASV165884	k__Bacteria	p__Cyanobacteria	c__Cyanobacteriia	o__Chloroplast	f__Morus indica	g__	s__
ASV166567	k__Bacteria	p__Cyanobacteria	c__Cyanobacteriia	o__Chloroplast	f__Elliptochloris bilobata	g__	s__
ASV166657	k__Bacteria	p__Cyanobacteria	c__Cyanobacteriia	o__Chloroplast	f__Sanionia uncinata	g__	s__
ASV166770	k__Bacteria	p__Cyanobacteria	c__Cyanobacteriia	o__Chloroplast	f__	g__	s__
ASV166817	k__Bacteria	p__Cyanobacteria	c__Cyanobacteriia	o__Chloroplast	f__Coccomyxa viridis	g__	s__
ASV167225	k__Bacteria	p__Cyanobacteria	c__Cyanobacteriia	o__Chloroplast	f__Morus indica	g__	s__
ASV167672	k__Bacteria	p__Cyanobacteria	c__Cyanobacteriia	o__Chloroplast	f__Morus indica	g__	s__
ASV167909	k__Bacteria	p__Cyanobacteria	c__Cyanobacteriia	o__Chloroplast	f__Dryopteris fragrans	g__	s__
ASV168011	k__Bacteria	p__Cyanobacteria	c__Cyanobacteriia	o__Chloroplast	f__Picea glauca (white spruce)	g__	s__
ASV168259	k__Bacteria	p__Cyanobacteria	c__Cyanobacteriia	o__Chloroplast	f__	g__	s__
ASV168460	k__Bacteria	p__Cyanobacteria	c__Cyanobacteriia	o__Chloroplast	f__	g__	s__
ASV168517	k__Bacteria	p__Cyanobacteria	c__Cyanobacteriia	o__Chloroplast	f__Castanea mollissima (Chinese chestnut)	g__	s__
ASV168575	k__Bacteria	p__Cyanobacteria	c__Cyanobacteriia	o__Chloroplast	f__Coccomyxa viridis	g__	s__
ASV168812	k__Bacteria	p__Cyanobacteria	c__Cyanobacteriia	o__Chloroplast	f__	g__	s__
ASV168848	k__Bacteria	p__Cyanobacteria	c__Cyanobacteriia	o__Chloroplast	f__	g__	s__
ASV168919	k__Bacteria	p__Cyanobacteria	c__Cyanobacteriia	o__Chloroplast	f__Picea glauca (white spruce)	g__	s__
ASV168932	k__Bacteria	p__Cyanobacteria	c__Cyanobacteriia	o__Chloroplast	f__Lactuca sativa	g__	s__
ASV169201	k__Bacteria	p__Cyanobacteria	c__Cyanobacteriia	o__Chloroplast	f__Morus indica	g__	s__
ASV169392	k__Bacteria	p__Cyanobacteria	c__Cyanobacteriia	o__Chloroplast	f__	g__	s__
ASV169450	k__Bacteria	p__Cyanobacteria	c__Cyanobacteriia	o__Chloroplast	f__	g__	s__
ASV169498	k__Bacteria	p__Cyanobacteria	c__Cyanobacteriia	o__Chloroplast	f__Sanionia uncinata	g__	s__
ASV169529	k__Bacteria	p__Cyanobacteria	c__Cyanobacteriia	o__Chloroplast	f__Coccomyxa viridis	g__	s__
ASV169550	k__Bacteria	p__Cyanobacteria	c__Cyanobacteriia	o__Chloroplast	f__Morus indica	g__	s__
ASV169558	k__Bacteria	p__Cyanobacteria	c__Cyanobacteriia	o__Chloroplast	f__	g__	s__
ASV169751	k__Bacteria	p__Cyanobacteria	c__Cyanobacteriia	o__Chloroplast	f__Castanea mollissima (Chinese chestnut)	g__	s__
ASV169814	k__Bacteria	p__Cyanobacteria	c__Cyanobacteriia	o__Chloroplast	f__Morus indica	g__	s__
ASV169836	k__Bacteria	p__Cyanobacteria	c__Cyanobacteriia	o__Chloroplast	f__	g__	s__
ASV169846	k__Bacteria	p__Cyanobacteria	c__Cyanobacteriia	o__Chloroplast	f__Marchantia paleacea	g__	s__
ASV169888	k__Bacteria	p__Cyanobacteria	c__Cyanobacteriia	o__Chloroplast	f__Morus indica	g__	s__
ASV170032	k__Bacteria	p__Cyanobacteria	c__Cyanobacteriia	o__Chloroplast	f__Citrus maxima	g__	s__
ASV170309	k__Bacteria	p__Cyanobacteria	c__Cyanobacteriia	o__Chloroplast	f__Klebsormidium nitens	g__	s__
ASV170369	k__Bacteria	p__Cyanobacteria	c__Cyanobacteriia	o__Chloroplast	f__Hydra vulgaris	g__	s__
ASV170527	k__Bacteria	p__Cyanobacteria	c__Cyanobacteriia	o__Chloroplast	f__Gossypium arboreum	g__	s__
ASV170554	k__Bacteria	p__Cyanobacteria	c__Cyanobacteriia	o__Chloroplast	f__	g__	s__
ASV170658	k__Bacteria	p__Cyanobacteria	c__Cyanobacteriia	o__Chloroplast	f__	g__	s__
ASV170693	k__Bacteria	p__Cyanobacteria	c__Cyanobacteriia	o__Chloroplast	f__Morus indica	g__	s__
ASV170697	k__Bacteria	p__Cyanobacteria	c__Cyanobacteriia	o__Chloroplast	f__	g__	s__
ASV171138	k__Bacteria	p__Cyanobacteria	c__Cyanobacteriia	o__Chloroplast	f__Nicotiana tabacum (common tobacco)	g__	s__
ASV171187	k__Bacteria	p__Cyanobacteria	c__Cyanobacteriia	o__Chloroplast	f__Morus indica	g__	s__
ASV171290	k__Bacteria	p__Cyanobacteria	c__Cyanobacteriia	o__Chloroplast	f__Morus indica	g__	s__
ASV171537	k__Bacteria	p__Cyanobacteria	c__Cyanobacteriia	o__Chloroplast	f__Taxus mairei	g__	s__
ASV171632	k__Bacteria	p__Cyanobacteria	c__Cyanobacteriia	o__Chloroplast	f__	g__	s__
ASV171902	k__Bacteria	p__Cyanobacteria	c__Cyanobacteriia	o__Chloroplast	f__Elliptochloris bilobata	g__	s__
ASV172082	k__Bacteria	p__Cyanobacteria	c__Cyanobacteriia	o__Chloroplast	f__	g__	s__
ASV172147	k__Bacteria	p__Cyanobacteria	c__Cyanobacteriia	o__Chloroplast	f__Picea glauca (white spruce)	g__	s__
ASV172546	k__Bacteria	p__Cyanobacteria	c__Cyanobacteriia	o__Chloroplast	f__Nicotiana tabacum (common tobacco)	g__	s__
ASV172665	k__Bacteria	p__Cyanobacteria	c__Cyanobacteriia	o__Chloroplast	f__Sanionia uncinata	g__	s__
ASV172730	k__Bacteria	p__Cyanobacteria	c__Cyanobacteriia	o__Chloroplast	f__Morus indica	g__	s__
ASV172782	k__Bacteria	p__Cyanobacteria	c__Cyanobacteriia	o__Chloroplast	f__	g__	s__
ASV173016	k__Bacteria	p__Cyanobacteria	c__Cyanobacteriia	o__Chloroplast	f__	g__	s__
ASV173031	k__Bacteria	p__Cyanobacteria	c__Cyanobacteriia	o__Chloroplast	f__	g__	s__
ASV173102	k__Bacteria	p__Cyanobacteria	c__Cyanobacteriia	o__Chloroplast	f__	g__	s__
ASV173114	k__Bacteria	p__Cyanobacteria	c__Cyanobacteriia	o__Chloroplast	f__Betula pendula (European white birch)	g__	s__
ASV173119	k__Bacteria	p__Cyanobacteria	c__Cyanobacteriia	o__Chloroplast	f__	g__	s__
ASV173334	k__Bacteria	p__Cyanobacteria	c__Cyanobacteriia	o__Chloroplast	f__Coccomyxa simplex	g__	s__
ASV173487	k__Bacteria	p__Cyanobacteria	c__Cyanobacteriia	o__Chloroplast	f__Gossypium arboreum	g__	s__
ASV173627	k__Bacteria	p__Cyanobacteria	c__Cyanobacteriia	o__Chloroplast	f__Gossypium arboreum	g__	s__
ASV173740	k__Bacteria	p__Cyanobacteria	c__Cyanobacteriia	o__Chloroplast	f__	g__	s__
ASV173824	k__Bacteria	p__Cyanobacteria	c__Cyanobacteriia	o__Chloroplast	f__	g__	s__
ASV173882	k__Bacteria	p__Cyanobacteria	c__Cyanobacteriia	o__Chloroplast	f__Nicotiana tabacum (common tobacco)	g__	s__
ASV173908	k__Bacteria	p__Cyanobacteria	c__Cyanobacteriia	o__Chloroplast	f__	g__	s__
ASV174076	k__Bacteria	p__Cyanobacteria	c__Cyanobacteriia	o__Chloroplast	f__Morus indica	g__	s__
ASV174225	k__Bacteria	p__Cyanobacteria	c__Cyanobacteriia	o__Chloroplast	f__	g__	s__
ASV174245	k__Bacteria	p__Cyanobacteria	c__Cyanobacteriia	o__Chloroplast	f__Morus indica	g__	s__
ASV174325	k__Bacteria	p__Cyanobacteria	c__Cyanobacteriia	o__Chloroplast	f__	g__	s__
ASV174410	k__Bacteria	p__Cyanobacteria	c__Cyanobacteriia	o__Chloroplast	f__Morus indica	g__	s__
ASV174487	k__Bacteria	p__Cyanobacteria	c__Cyanobacteriia	o__Chloroplast	f__Morus indica	g__	s__
ASV174576	k__Bacteria	p__Cyanobacteria	c__Cyanobacteriia	o__Chloroplast	f__	g__	s__
ASV174601	k__Bacteria	p__Cyanobacteria	c__Cyanobacteriia	o__Chloroplast	f__Dryopteris fragrans	g__	s__
ASV174649	k__Bacteria	p__Cyanobacteria	c__Cyanobacteriia	o__Chloroplast	f__	g__	s__
ASV174675	k__Bacteria	p__Cyanobacteria	c__Cyanobacteriia	o__Chloroplast	f__Betula pendula (European white birch)	g__	s__
ASV174684	k__Bacteria	p__Cyanobacteria	c__Cyanobacteriia	o__Chloroplast	f__	g__	s__
ASV174990	k__Bacteria	p__Cyanobacteria	c__Cyanobacteriia	o__Chloroplast	f__	g__	s__
ASV175018	k__Bacteria	p__Cyanobacteria	c__Cyanobacteriia	o__Chloroplast	f__	g__	s__
ASV175096	k__Bacteria	p__Cyanobacteria	c__Cyanobacteriia	o__Chloroplast	f__	g__	s__
ASV175346	k__Bacteria	p__Cyanobacteria	c__Cyanobacteriia	o__Chloroplast	f__Elliptochloris bilobata	g__	s__
ASV175468	k__Bacteria	p__Cyanobacteria	c__Cyanobacteriia	o__Chloroplast	f__Coccomyxa viridis	g__	s__
ASV175500	k__Bacteria	p__Cyanobacteria	c__Cyanobacteriia	o__Chloroplast	f__Hydra vulgaris	g__	s__
ASV175583	k__Bacteria	p__Cyanobacteria	c__Cyanobacteriia	o__Chloroplast	f__Nicotiana tabacum (common tobacco)	g__	s__
ASV175593	k__Bacteria	p__Cyanobacteria	c__Cyanobacteriia	o__Chloroplast	f__Monoraphidium neglectum	g__	s__
ASV175721	k__Bacteria	p__Cyanobacteria	c__Cyanobacteriia	o__Chloroplast	f__Morus indica	g__	s__
ASV175740	k__Bacteria	p__Cyanobacteria	c__Cyanobacteriia	o__Chloroplast	f__	g__	s__
ASV175764	k__Bacteria	p__Cyanobacteria	c__Cyanobacteriia	o__Chloroplast	f__	g__	s__
ASV175770	k__Bacteria	p__Cyanobacteria	c__Cyanobacteriia	o__Chloroplast	f__Lactuca sativa	g__	s__
ASV175924	k__Bacteria	p__Cyanobacteria	c__Cyanobacteriia	o__Chloroplast	f__	g__	s__
ASV175931	k__Bacteria	p__Cyanobacteria	c__Cyanobacteriia	o__Chloroplast	f__	g__	s__
ASV175950	k__Bacteria	p__Cyanobacteria	c__Cyanobacteriia	o__Chloroplast	f__Picea glauca (white spruce)	g__	s__
ASV175955	k__Bacteria	p__Cyanobacteria	c__Cyanobacteriia	o__Chloroplast	f__	g__	s__
ASV176057	k__Bacteria	p__Cyanobacteria	c__Cyanobacteriia	o__Chloroplast	f__Symbiochloris handae	g__	s__
ASV176110	k__Bacteria	p__Cyanobacteria	c__Cyanobacteriia	o__Chloroplast	f__Elliptochloris bilobata	g__	s__
ASV176170	k__Bacteria	p__Cyanobacteria	c__Cyanobacteriia	o__Chloroplast	f__Neglectella solitaria	g__	s__
ASV176199	k__Bacteria	p__Cyanobacteria	c__Cyanobacteriia	o__Chloroplast	f__	g__	s__
ASV176389	k__Bacteria	p__Cyanobacteria	c__Cyanobacteriia	o__Chloroplast	f__Hydra vulgaris	g__	s__
ASV176425	k__Bacteria	p__Cyanobacteria	c__Cyanobacteriia	o__Chloroplast	f__Sphagnum angustifolium	g__	s__
ASV176473	k__Bacteria	p__Cyanobacteria	c__Cyanobacteriia	o__Chloroplast	f__Morus indica	g__	s__
ASV176647	k__Bacteria	p__Cyanobacteria	c__Cyanobacteriia	o__Chloroplast	f__Hydra vulgaris	g__	s__
ASV176768	k__Bacteria	p__Cyanobacteria	c__Cyanobacteriia	o__Chloroplast	f__	g__	s__
ASV177467	k__Bacteria	p__Cyanobacteria	c__Cyanobacteriia	o__Chloroplast	f__Coccomyxa simplex	g__	s__
ASV177535	k__Bacteria	p__Cyanobacteria	c__Cyanobacteriia	o__Chloroplast	f__	g__	s__
ASV177636	k__Bacteria	p__Cyanobacteria	c__Cyanobacteriia	o__Chloroplast	f__Morus indica	g__	s__
ASV177702	k__Bacteria	p__Cyanobacteria	c__Cyanobacteriia	o__Chloroplast	f__	g__	s__
ASV177728	k__Bacteria	p__Cyanobacteria	c__Cyanobacteriia	o__Chloroplast	f__	g__	s__
ASV177737	k__Bacteria	p__Cyanobacteria	c__Cyanobacteriia	o__Chloroplast	f__Nicotiana tabacum (common tobacco)	g__	s__
ASV177906	k__Bacteria	p__Cyanobacteria	c__Cyanobacteriia	o__Chloroplast	f__	g__	s__
ASV177911	k__Bacteria	p__Cyanobacteria	c__Cyanobacteriia	o__Chloroplast	f__Sanionia uncinata	g__	s__
ASV177961	k__Bacteria	p__Cyanobacteria	c__Cyanobacteriia	o__Chloroplast	f__	g__	s__
ASV177963	k__Bacteria	p__Cyanobacteria	c__Cyanobacteriia	o__Chloroplast	f__Coccomyxa viridis	g__	s__
ASV177981	k__Bacteria	p__Cyanobacteria	c__Cyanobacteriia	o__Chloroplast	f__Morus indica	g__	s__
ASV177996	k__Bacteria	p__Cyanobacteria	c__Cyanobacteriia	o__Chloroplast	f__	g__	s__
ASV178027	k__Bacteria	p__Cyanobacteria	c__Cyanobacteriia	o__Chloroplast	f__Morus indica	g__	s__
ASV178044	k__Bacteria	p__Cyanobacteria	c__Cyanobacteriia	o__Chloroplast	f__Nicotiana tabacum (common tobacco)	g__	s__
ASV178069	k__Bacteria	p__Cyanobacteria	c__Cyanobacteriia	o__Chloroplast	f__Elliptochloris bilobata	g__	s__
ASV178426	k__Bacteria	p__Cyanobacteria	c__Cyanobacteriia	o__Chloroplast	f__Betula pendula (European white birch)	g__	s__
ASV178434	k__Bacteria	p__Cyanobacteria	c__Cyanobacteriia	o__Chloroplast	f__	g__	s__
ASV178894	k__Bacteria	p__Cyanobacteria	c__Cyanobacteriia	o__Chloroplast	f__Nicotiana tabacum (common tobacco)	g__	s__
ASV178934	k__Bacteria	p__Cyanobacteria	c__Cyanobacteriia	o__Chloroplast	f__Hydra vulgaris	g__	s__
ASV178987	k__Bacteria	p__Cyanobacteria	c__Cyanobacteriia	o__Chloroplast	f__	g__	s__
ASV179619	k__Bacteria	p__Cyanobacteria	c__Cyanobacteriia	o__Chloroplast	f__Coccomyxa viridis	g__	s__
ASV179746	k__Bacteria	p__Cyanobacteria	c__Cyanobacteriia	o__Chloroplast	f__Elliptochloris bilobata	g__	s__
ASV179772	k__Bacteria	p__Cyanobacteria	c__Cyanobacteriia	o__Chloroplast	f__Morus indica	g__	s__
ASV179904	k__Bacteria	p__Cyanobacteria	c__Cyanobacteriia	o__Chloroplast	f__	g__	s__
ASV179944	k__Bacteria	p__Cyanobacteria	c__Cyanobacteriia	o__Chloroplast	f__Sphagnum angustifolium	g__	s__
ASV180013	k__Bacteria	p__Cyanobacteria	c__Cyanobacteriia	o__Chloroplast	f__Coccomyxa simplex	g__	s__
ASV180101	k__Bacteria	p__Cyanobacteria	c__Cyanobacteriia	o__Chloroplast	f__	g__	s__
ASV180167	k__Bacteria	p__Cyanobacteria	c__Cyanobacteriia	o__Chloroplast	f__Morus indica	g__	s__
ASV180205	k__Bacteria	p__Cyanobacteria	c__Cyanobacteriia	o__Chloroplast	f__Vaccinium macrocarpon	g__	s__
ASV180258	k__Bacteria	p__Cyanobacteria	c__Cyanobacteriia	o__Chloroplast	f__Hydra vulgaris	g__	s__
ASV180865	k__Bacteria	p__Cyanobacteria	c__Cyanobacteriia	o__Chloroplast	f__	g__	s__
ASV180884	k__Bacteria	p__Cyanobacteria	c__Cyanobacteriia	o__Chloroplast	f__	g__	s__
ASV180937	k__Bacteria	p__Cyanobacteria	c__Cyanobacteriia	o__Chloroplast	f__Dryopteris fragrans	g__	s__
ASV180938	k__Bacteria	p__Cyanobacteria	c__Cyanobacteriia	o__Chloroplast	f__Morus indica	g__	s__
ASV180996	k__Bacteria	p__Cyanobacteria	c__Cyanobacteriia	o__Chloroplast	f__Castanea mollissima (Chinese chestnut)	g__	s__
ASV181008	k__Bacteria	p__Cyanobacteria	c__Cyanobacteriia	o__Chloroplast	f__Morus indica	g__	s__
ASV181034	k__Bacteria	p__Cyanobacteria	c__Cyanobacteriia	o__Chloroplast	f__Morus indica	g__	s__
ASV181170	k__Bacteria	p__Cyanobacteria	c__Cyanobacteriia	o__Chloroplast	f__Hordeum vulgare subsp. vulgare (domesticated barley)	g__	s__
ASV181428	k__Bacteria	p__Cyanobacteria	c__Cyanobacteriia	o__Chloroplast	f__Symbiochloris handae	g__	s__
ASV181789	k__Bacteria	p__Cyanobacteria	c__Cyanobacteriia	o__Chloroplast	f__	g__	s__
ASV182109	k__Bacteria	p__Cyanobacteria	c__Cyanobacteriia	o__Chloroplast	f__	g__	s__
ASV182928	k__Bacteria	p__Cyanobacteria	c__Cyanobacteriia	o__Chloroplast	f__Calycanthus floridus var. glaucus	g__	s__
ASV182978	k__Bacteria	p__Cyanobacteria	c__Cyanobacteriia	o__Chloroplast	f__Morus indica	g__	s__
ASV183040	k__Bacteria	p__Cyanobacteria	c__Cyanobacteriia	o__Chloroplast	f__Symbiochloris handae	g__	s__
ASV183202	k__Bacteria	p__Cyanobacteria	c__Cyanobacteriia	o__Chloroplast	f__Coccomyxa viridis	g__	s__
ASV183208	k__Bacteria	p__Cyanobacteria	c__Cyanobacteriia	o__Chloroplast	f__	g__	s__
ASV183237	k__Bacteria	p__Cyanobacteria	c__Cyanobacteriia	o__Chloroplast	f__Eimeria praecox	g__	s__
ASV183269	k__Bacteria	p__Cyanobacteria	c__Cyanobacteriia	o__Chloroplast	f__	g__	s__
ASV183385	k__Bacteria	p__Cyanobacteria	c__Cyanobacteriia	o__Chloroplast	f__	g__	s__
ASV183423	k__Bacteria	p__Cyanobacteria	c__Cyanobacteriia	o__Chloroplast	f__Castanea mollissima (Chinese chestnut)	g__	s__
ASV183663	k__Bacteria	p__Cyanobacteria	c__Cyanobacteriia	o__Chloroplast	f__Nicotiana tabacum (common tobacco)	g__	s__
ASV183790	k__Bacteria	p__Cyanobacteria	c__Cyanobacteriia	o__Chloroplast	f__	g__	s__
ASV183927	k__Bacteria	p__Cyanobacteria	c__Cyanobacteriia	o__Chloroplast	f__Citrus maxima	g__	s__
ASV184186	k__Bacteria	p__Cyanobacteria	c__Cyanobacteriia	o__Chloroplast	f__	g__	s__
ASV184203	k__Bacteria	p__Cyanobacteria	c__Cyanobacteriia	o__Chloroplast	f__Nicotiana tabacum (common tobacco)	g__	s__
ASV184426	k__Bacteria	p__Cyanobacteria	c__Cyanobacteriia	o__Chloroplast	f__Elliptochloris bilobata	g__	s__
ASV184472	k__Bacteria	p__Cyanobacteria	c__Cyanobacteriia	o__Chloroplast	f__	g__	s__
ASV184615	k__Bacteria	p__Cyanobacteria	c__Cyanobacteriia	o__Chloroplast	f__Morus indica	g__	s__
ASV184703	k__Bacteria	p__Cyanobacteria	c__Cyanobacteriia	o__Chloroplast	f__	g__	s__
ASV184973	k__Bacteria	p__Cyanobacteria	c__Cyanobacteriia	o__Chloroplast	f__Citrus maxima	g__	s__
ASV185160	k__Bacteria	p__Cyanobacteria	c__Cyanobacteriia	o__Chloroplast	f__Nicotiana tabacum (common tobacco)	g__	s__
ASV185162	k__Bacteria	p__Cyanobacteria	c__Cyanobacteriia	o__Chloroplast	f__	g__	s__
ASV185265	k__Bacteria	p__Cyanobacteria	c__Cyanobacteriia	o__Chloroplast	f__	g__	s__
ASV185923	k__Bacteria	p__Cyanobacteria	c__Cyanobacteriia	o__Chloroplast	f__Nicotiana tabacum (common tobacco)	g__	s__
ASV185969	k__Bacteria	p__Cyanobacteria	c__Cyanobacteriia	o__Chloroplast	f__Elliptochloris bilobata	g__	s__
ASV185970	k__Bacteria	p__Cyanobacteria	c__Cyanobacteriia	o__Chloroplast	f__Lactuca sativa	g__	s__
ASV186081	k__Bacteria	p__Cyanobacteria	c__Cyanobacteriia	o__Chloroplast	f__Morus indica	g__	s__
ASV186098	k__Bacteria	p__Cyanobacteria	c__Cyanobacteriia	o__Chloroplast	f__Nicotiana tabacum (common tobacco)	g__	s__
ASV186472	k__Bacteria	p__Cyanobacteria	c__Cyanobacteriia	o__Chloroplast	f__Dryopteris fragrans	g__	s__
ASV186491	k__Bacteria	p__Cyanobacteria	c__Cyanobacteriia	o__Chloroplast	f__Hydra vulgaris	g__	s__
ASV186673	k__Bacteria	p__Cyanobacteria	c__Cyanobacteriia	o__Chloroplast	f__	g__	s__
ASV186720	k__Bacteria	p__Cyanobacteria	c__Cyanobacteriia	o__Chloroplast	f__Morus indica	g__	s__
ASV186744	k__Bacteria	p__Cyanobacteria	c__Cyanobacteriia	o__Chloroplast	f__Hydra vulgaris	g__	s__
ASV187071	k__Bacteria	p__Cyanobacteria	c__Cyanobacteriia	o__Chloroplast	f__Morus indica	g__	s__
ASV187153	k__Bacteria	p__Cyanobacteria	c__Cyanobacteriia	o__Chloroplast	f__Morus indica	g__	s__
ASV187167	k__Bacteria	p__Cyanobacteria	c__Cyanobacteriia	o__Chloroplast	f__Nicotiana tabacum (common tobacco)	g__	s__
ASV187267	k__Bacteria	p__Cyanobacteria	c__Cyanobacteriia	o__Chloroplast	f__Morus indica	g__	s__
ASV187569	k__Bacteria	p__Cyanobacteria	c__Cyanobacteriia	o__Chloroplast	f__Elliptochloris bilobata	g__	s__
ASV187616	k__Bacteria	p__Cyanobacteria	c__Cyanobacteriia	o__Chloroplast	f__Betula pendula (European white birch)	g__	s__
ASV187630	k__Bacteria	p__Cyanobacteria	c__Cyanobacteriia	o__Chloroplast	f__	g__	s__
ASV188050	k__Bacteria	p__Cyanobacteria	c__Cyanobacteriia	o__Chloroplast	f__Morus indica	g__	s__
ASV188081	k__Bacteria	p__Cyanobacteria	c__Cyanobacteriia	o__Chloroplast	f__Picea glauca (white spruce)	g__	s__
ASV188089	k__Bacteria	p__Cyanobacteria	c__Cyanobacteriia	o__Chloroplast	f__Nicotiana tabacum (common tobacco)	g__	s__
ASV188150	k__Bacteria	p__Cyanobacteria	c__Cyanobacteriia	o__Chloroplast	f__Hydra vulgaris	g__	s__
ASV188317	k__Bacteria	p__Cyanobacteria	c__Cyanobacteriia	o__Chloroplast	f__Morus indica	g__	s__
ASV188445	k__Bacteria	p__Cyanobacteria	c__Cyanobacteriia	o__Chloroplast	f__Morus indica	g__	s__
ASV188821	k__Bacteria	p__Cyanobacteria	c__Cyanobacteriia	o__Chloroplast	f__Hydra vulgaris	g__	s__
ASV189432	k__Bacteria	p__Cyanobacteria	c__Cyanobacteriia	o__Chloroplast	f__Coccomyxa simplex	g__	s__
ASV189464	k__Bacteria	p__Cyanobacteria	c__Cyanobacteriia	o__Chloroplast	f__	g__	s__
ASV189501	k__Bacteria	p__Cyanobacteria	c__Cyanobacteriia	o__Chloroplast	f__	g__	s__
ASV189647	k__Bacteria	p__Cyanobacteria	c__Cyanobacteriia	o__Chloroplast	f__Morus indica	g__	s__
ASV189662	k__Bacteria	p__Cyanobacteria	c__Cyanobacteriia	o__Chloroplast	f__	g__	s__
ASV190495	k__Bacteria	p__Cyanobacteria	c__Cyanobacteriia	o__Chloroplast	f__Monoraphidium neglectum	g__	s__
ASV190619	k__Bacteria	p__Cyanobacteria	c__Cyanobacteriia	o__Chloroplast	f__Morus indica	g__	s__
ASV190664	k__Bacteria	p__Cyanobacteria	c__Cyanobacteriia	o__Chloroplast	f__Gossypium arboreum	g__	s__
ASV190872	k__Bacteria	p__Cyanobacteria	c__Cyanobacteriia	o__Chloroplast	f__Nicotiana tabacum (common tobacco)	g__	s__
ASV190935	k__Bacteria	p__Cyanobacteria	c__Cyanobacteriia	o__Chloroplast	f__Coccomyxa viridis	g__	s__
ASV191069	k__Bacteria	p__Cyanobacteria	c__Cyanobacteriia	o__Chloroplast	f__Dryopteris fragrans	g__	s__
ASV191115	k__Bacteria	p__Cyanobacteria	c__Cyanobacteriia	o__Chloroplast	f__Taxus mairei	g__	s__
ASV191453	k__Bacteria	p__Cyanobacteria	c__Cyanobacteriia	o__Chloroplast	f__Morus indica	g__	s__
ASV191474	k__Bacteria	p__Cyanobacteria	c__Cyanobacteriia	o__Chloroplast	f__Morus indica	g__	s__
ASV191480	k__Bacteria	p__Cyanobacteria	c__Cyanobacteriia	o__Chloroplast	f__	g__	s__
ASV191556	k__Bacteria	p__Cyanobacteria	c__Cyanobacteriia	o__Chloroplast	f__Nicotiana tabacum (common tobacco)	g__	s__
ASV191793	k__Bacteria	p__Cyanobacteria	c__Cyanobacteriia	o__Chloroplast	f__Morus indica	g__	s__
ASV191811	k__Bacteria	p__Cyanobacteria	c__Cyanobacteriia	o__Chloroplast	f__Picea glauca (white spruce)	g__	s__
ASV191906	k__Bacteria	p__Cyanobacteria	c__Cyanobacteriia	o__Chloroplast	f__	g__	s__
ASV191991	k__Bacteria	p__Cyanobacteria	c__Cyanobacteriia	o__Chloroplast	f__	g__	s__
ASV192191	k__Bacteria	p__Cyanobacteria	c__Cyanobacteriia	o__Chloroplast	f__Morus indica	g__	s__
ASV192208	k__Bacteria	p__Cyanobacteria	c__Cyanobacteriia	o__Chloroplast	f__Morus indica	g__	s__
ASV192363	k__Bacteria	p__Cyanobacteria	c__Cyanobacteriia	o__Chloroplast	f__	g__	s__
ASV192534	k__Bacteria	p__Cyanobacteria	c__Cyanobacteriia	o__Chloroplast	f__Elliptochloris bilobata	g__	s__
ASV193123	k__Bacteria	p__Cyanobacteria	c__Cyanobacteriia	o__Chloroplast	f__Picea glauca (white spruce)	g__	s__
ASV193235	k__Bacteria	p__Cyanobacteria	c__Cyanobacteriia	o__Chloroplast	f__	g__	s__
ASV193255	k__Bacteria	p__Cyanobacteria	c__Cyanobacteriia	o__Chloroplast	f__Castanea mollissima (Chinese chestnut)	g__	s__
ASV193319	k__Bacteria	p__Cyanobacteria	c__Cyanobacteriia	o__Chloroplast	f__Edaphochlorella mirabilis	g__	s__
ASV193588	k__Bacteria	p__Cyanobacteria	c__Cyanobacteriia	o__Chloroplast	f__Nicotiana tabacum (common tobacco)	g__	s__
ASV193597	k__Bacteria	p__Cyanobacteria	c__Cyanobacteriia	o__Chloroplast	f__	g__	s__
ASV193742	k__Bacteria	p__Cyanobacteria	c__Cyanobacteriia	o__Chloroplast	f__Morus indica	g__	s__
ASV193764	k__Bacteria	p__Cyanobacteria	c__Cyanobacteriia	o__Chloroplast	f__Coccomyxa simplex	g__	s__
ASV193949	k__Bacteria	p__Cyanobacteria	c__Cyanobacteriia	o__Chloroplast	f__	g__	s__
ASV194253	k__Bacteria	p__Cyanobacteria	c__Cyanobacteriia	o__Chloroplast	f__Nicotiana tabacum (common tobacco)	g__	s__
ASV194269	k__Bacteria	p__Cyanobacteria	c__Cyanobacteriia	o__Chloroplast	f__Coccomyxa viridis	g__	s__
ASV194363	k__Bacteria	p__Cyanobacteria	c__Cyanobacteriia	o__Chloroplast	f__Pseudochlorella pringsheimii	g__	s__
ASV194456	k__Bacteria	p__Cyanobacteria	c__Cyanobacteriia	o__Chloroplast	f__Hydra vulgaris	g__	s__
ASV194460	k__Bacteria	p__Cyanobacteria	c__Cyanobacteriia	o__Chloroplast	f__Nicotiana tabacum (common tobacco)	g__	s__
ASV194485	k__Bacteria	p__Cyanobacteria	c__Cyanobacteriia	o__Chloroplast	f__Morus indica	g__	s__
ASV194491	k__Bacteria	p__Cyanobacteria	c__Cyanobacteriia	o__Chloroplast	f__Coccomyxa viridis	g__	s__
ASV194563	k__Bacteria	p__Cyanobacteria	c__Cyanobacteriia	o__Chloroplast	f__	g__	s__
ASV194639	k__Bacteria	p__Cyanobacteria	c__Cyanobacteriia	o__Chloroplast	f__Dryopteris fragrans	g__	s__
ASV194706	k__Bacteria	p__Cyanobacteria	c__Cyanobacteriia	o__Chloroplast	f__Nicotiana tabacum (common tobacco)	g__	s__
ASV194840	k__Bacteria	p__Cyanobacteria	c__Cyanobacteriia	o__Chloroplast	f__	g__	s__
ASV194866	k__Bacteria	p__Cyanobacteria	c__Cyanobacteriia	o__Chloroplast	f__Castanea mollissima (Chinese chestnut)	g__	s__
ASV194917	k__Bacteria	p__Cyanobacteria	c__Cyanobacteriia	o__Chloroplast	f__Coccomyxa simplex	g__	s__
ASV195020	k__Bacteria	p__Cyanobacteria	c__Cyanobacteriia	o__Chloroplast	f__	g__	s__
ASV195045	k__Bacteria	p__Cyanobacteria	c__Cyanobacteriia	o__Chloroplast	f__Nicotiana tabacum (common tobacco)	g__	s__
ASV195054	k__Bacteria	p__Cyanobacteria	c__Cyanobacteriia	o__Chloroplast	f__	g__	s__
ASV195330	k__Bacteria	p__Cyanobacteria	c__Cyanobacteriia	o__Chloroplast	f__	g__	s__
ASV195407	k__Bacteria	p__Cyanobacteria	c__Cyanobacteriia	o__Chloroplast	f__	g__	s__
ASV195425	k__Bacteria	p__Cyanobacteria	c__Cyanobacteriia	o__Chloroplast	f__Hydra vulgaris	g__	s__
ASV195497	k__Bacteria	p__Cyanobacteria	c__Cyanobacteriia	o__Chloroplast	f__	g__	s__
ASV195507	k__Bacteria	p__Cyanobacteria	c__Cyanobacteriia	o__Chloroplast	f__	g__	s__
ASV195696	k__Bacteria	p__Cyanobacteria	c__Cyanobacteriia	o__Chloroplast	f__	g__	s__
ASV195954	k__Bacteria	p__Cyanobacteria	c__Cyanobacteriia	o__Chloroplast	f__Sanionia uncinata	g__	s__
ASV196028	k__Bacteria	p__Cyanobacteria	c__Cyanobacteriia	o__Chloroplast	f__	g__	s__
ASV196049	k__Bacteria	p__Cyanobacteria	c__Cyanobacteriia	o__Chloroplast	f__	g__	s__
ASV196145	k__Bacteria	p__Cyanobacteria	c__Cyanobacteriia	o__Chloroplast	f__Elliptochloris bilobata	g__	s__
ASV196151	k__Bacteria	p__Cyanobacteria	c__Cyanobacteriia	o__Chloroplast	f__Morus indica	g__	s__
ASV196183	k__Bacteria	p__Cyanobacteria	c__Cyanobacteriia	o__Chloroplast	f__Morus indica	g__	s__
ASV196204	k__Bacteria	p__Cyanobacteria	c__Cyanobacteriia	o__Chloroplast	f__Dryopteris fragrans	g__	s__
ASV196430	k__Bacteria	p__Cyanobacteria	c__Cyanobacteriia	o__Chloroplast	f__Coccomyxa simplex	g__	s__
ASV196585	k__Bacteria	p__Cyanobacteria	c__Cyanobacteriia	o__Chloroplast	f__Humulus lupulus var. cordifolius	g__	s__
ASV196783	k__Bacteria	p__Cyanobacteria	c__Cyanobacteriia	o__Chloroplast	f__Morus indica	g__	s__
ASV196817	k__Bacteria	p__Cyanobacteria	c__Cyanobacteriia	o__Chloroplast	f__Marchantia paleacea	g__	s__
ASV196852	k__Bacteria	p__Cyanobacteria	c__Cyanobacteriia	o__Chloroplast	f__Morus indica	g__	s__
ASV196932	k__Bacteria	p__Cyanobacteria	c__Cyanobacteriia	o__Chloroplast	f__Morus indica	g__	s__
ASV196970	k__Bacteria	p__Cyanobacteria	c__Cyanobacteriia	o__Chloroplast	f__Symbiochloris handae	g__	s__
ASV197029	k__Bacteria	p__Cyanobacteria	c__Cyanobacteriia	o__Chloroplast	f__Morus indica	g__	s__
ASV197274	k__Bacteria	p__Cyanobacteria	c__Cyanobacteriia	o__Chloroplast	f__Sanionia uncinata	g__	s__
ASV197369	k__Bacteria	p__Cyanobacteria	c__Cyanobacteriia	o__Chloroplast	f__	g__	s__
ASV197458	k__Bacteria	p__Cyanobacteria	c__Cyanobacteriia	o__Chloroplast	f__Morus indica	g__	s__
ASV197513	k__Bacteria	p__Cyanobacteria	c__Cyanobacteriia	o__Chloroplast	f__Castanea mollissima (Chinese chestnut)	g__	s__
ASV197535	k__Bacteria	p__Cyanobacteria	c__Cyanobacteriia	o__Chloroplast	f__	g__	s__
ASV197720	k__Bacteria	p__Cyanobacteria	c__Cyanobacteriia	o__Chloroplast	f__	g__	s__
ASV198292	k__Bacteria	p__Cyanobacteria	c__Cyanobacteriia	o__Chloroplast	f__	g__	s__
ASV198307	k__Bacteria	p__Cyanobacteria	c__Cyanobacteriia	o__Chloroplast	f__Bracteacoccus aerius	g__	s__
ASV198320	k__Bacteria	p__Cyanobacteria	c__Cyanobacteriia	o__Chloroplast	f__Morus indica	g__	s__
ASV198333	k__Bacteria	p__Cyanobacteria	c__Cyanobacteriia	o__Chloroplast	f__Elliptochloris bilobata	g__	s__
ASV198495	k__Bacteria	p__Cyanobacteria	c__Cyanobacteriia	o__Chloroplast	f__	g__	s__
ASV198535	k__Bacteria	p__Cyanobacteria	c__Cyanobacteriia	o__Chloroplast	f__Morus indica	g__	s__
ASV198554	k__Bacteria	p__Cyanobacteria	c__Cyanobacteriia	o__Chloroplast	f__Symbiochloris handae	g__	s__
ASV198884	k__Bacteria	p__Cyanobacteria	c__Cyanobacteriia	o__Chloroplast	f__Coccomyxa viridis	g__	s__
ASV199162	k__Bacteria	p__Cyanobacteria	c__Cyanobacteriia	o__Chloroplast	f__	g__	s__
ASV199283	k__Bacteria	p__Cyanobacteria	c__Cyanobacteriia	o__Chloroplast	f__	g__	s__
ASV199346	k__Bacteria	p__Cyanobacteria	c__Cyanobacteriia	o__Chloroplast	f__Elliptochloris bilobata	g__	s__
ASV199355	k__Bacteria	p__Cyanobacteria	c__Cyanobacteriia	o__Chloroplast	f__	g__	s__
ASV199359	k__Bacteria	p__Cyanobacteria	c__Cyanobacteriia	o__Chloroplast	f__Coccomyxa viridis	g__	s__
ASV199367	k__Bacteria	p__Cyanobacteria	c__Cyanobacteriia	o__Chloroplast	f__Nicotiana tabacum (common tobacco)	g__	s__
ASV199675	k__Bacteria	p__Cyanobacteria	c__Cyanobacteriia	o__Chloroplast	f__Coccomyxa viridis	g__	s__
ASV199691	k__Bacteria	p__Cyanobacteria	c__Cyanobacteriia	o__Chloroplast	f__Morus indica	g__	s__
ASV199830	k__Bacteria	p__Cyanobacteria	c__Cyanobacteriia	o__Chloroplast	f__Coccomyxa viridis	g__	s__
ASV199875	k__Bacteria	p__Cyanobacteria	c__Cyanobacteriia	o__Chloroplast	f__	g__	s__
ASV199944	k__Bacteria	p__Cyanobacteria	c__Cyanobacteriia	o__Chloroplast	f__	g__	s__
ASV199999	k__Bacteria	p__Cyanobacteria	c__Cyanobacteriia	o__Chloroplast	f__	g__	s__
ASV200173	k__Bacteria	p__Cyanobacteria	c__Cyanobacteriia	o__Chloroplast	f__Watanabea reniformis	g__	s__
ASV200360	k__Bacteria	p__Cyanobacteria	c__Cyanobacteriia	o__Chloroplast	f__	g__	s__
ASV200577	k__Bacteria	p__Cyanobacteria	c__Cyanobacteriia	o__Chloroplast	f__Nicotiana tabacum (common tobacco)	g__	s__
ASV200642	k__Bacteria	p__Cyanobacteria	c__Cyanobacteriia	o__Chloroplast	f__	g__	s__
ASV200834	k__Bacteria	p__Cyanobacteria	c__Cyanobacteriia	o__Chloroplast	f__Paradoxia multiseta	g__	s__
ASV200879	k__Bacteria	p__Cyanobacteria	c__Cyanobacteriia	o__Chloroplast	f__Hydra vulgaris	g__	s__
ASV200894	k__Bacteria	p__Cyanobacteria	c__Cyanobacteriia	o__Chloroplast	f__	g__	s__
ASV200910	k__Bacteria	p__Cyanobacteria	c__Cyanobacteriia	o__Chloroplast	f__Morus indica	g__	s__
ASV200966	k__Bacteria	p__Cyanobacteria	c__Cyanobacteriia	o__Chloroplast	f__Morus indica	g__	s__
ASV200994	k__Bacteria	p__Cyanobacteria	c__Cyanobacteriia	o__Chloroplast	f__Chlamydomonas nivalis	g__	s__
ASV201011	k__Bacteria	p__Cyanobacteria	c__Cyanobacteriia	o__Chloroplast	f__Hydra vulgaris	g__	s__
ASV201035	k__Bacteria	p__Cyanobacteria	c__Cyanobacteriia	o__Chloroplast	f__Calycanthus floridus var. glaucus	g__	s__
ASV201306	k__Bacteria	p__Cyanobacteria	c__Cyanobacteriia	o__Chloroplast	f__Coccomyxa sp. SUA001	g__	s__
ASV201364	k__Bacteria	p__Cyanobacteria	c__Cyanobacteriia	o__Chloroplast	f__Chloromonas radiata	g__	s__
ASV201371	k__Bacteria	p__Cyanobacteria	c__Cyanobacteriia	o__Chloroplast	f__Betula pendula (European white birch)	g__	s__
ASV201475	k__Bacteria	p__Cyanobacteria	c__Cyanobacteriia	o__Chloroplast	f__Morus indica	g__	s__
ASV201499	k__Bacteria	p__Cyanobacteria	c__Cyanobacteriia	o__Chloroplast	f__	g__	s__
ASV201692	k__Bacteria	p__Cyanobacteria	c__Cyanobacteriia	o__Chloroplast	f__	g__	s__
ASV201698	k__Bacteria	p__Cyanobacteria	c__Cyanobacteriia	o__Chloroplast	f__Symbiochloris handae	g__	s__
ASV201799	k__Bacteria	p__Cyanobacteria	c__Cyanobacteriia	o__Chloroplast	f__	g__	s__
ASV201978	k__Bacteria	p__Cyanobacteria	c__Cyanobacteriia	o__Chloroplast	f__Picea glauca (white spruce)	g__	s__
ASV202191	k__Bacteria	p__Cyanobacteria	c__Cyanobacteriia	o__Chloroplast	f__	g__	s__
ASV202314	k__Bacteria	p__Cyanobacteria	c__Cyanobacteriia	o__Chloroplast	f__Sanionia uncinata	g__	s__
ASV202362	k__Bacteria	p__Cyanobacteria	c__Cyanobacteriia	o__Chloroplast	f__	g__	s__
ASV202527	k__Bacteria	p__Cyanobacteria	c__Cyanobacteriia	o__Chloroplast	f__	g__	s__
ASV202626	k__Bacteria	p__Cyanobacteria	c__Cyanobacteriia	o__Chloroplast	f__Morus indica	g__	s__
ASV202805	k__Bacteria	p__Cyanobacteria	c__Cyanobacteriia	o__Chloroplast	f__Morus indica	g__	s__
ASV202867	k__Bacteria	p__Cyanobacteria	c__Cyanobacteriia	o__Chloroplast	f__Nicotiana tabacum (common tobacco)	g__	s__
ASV202935	k__Bacteria	p__Cyanobacteria	c__Cyanobacteriia	o__Chloroplast	f__Castanea mollissima (Chinese chestnut)	g__	s__
ASV203143	k__Bacteria	p__Cyanobacteria	c__Cyanobacteriia	o__Chloroplast	f__Coccomyxa viridis	g__	s__
ASV203355	k__Bacteria	p__Cyanobacteria	c__Cyanobacteriia	o__Chloroplast	f__Dryopteris fragrans	g__	s__
ASV203520	k__Bacteria	p__Cyanobacteria	c__Cyanobacteriia	o__Chloroplast	f__	g__	s__
ASV203759	k__Bacteria	p__Cyanobacteria	c__Cyanobacteriia	o__Chloroplast	f__Dryopteris fragrans	g__	s__
ASV203784	k__Bacteria	p__Cyanobacteria	c__Cyanobacteriia	o__Chloroplast	f__Picea glauca (white spruce)	g__	s__
ASV203868	k__Bacteria	p__Cyanobacteria	c__Cyanobacteriia	o__Chloroplast	f__	g__	s__
ASV203869	k__Bacteria	p__Cyanobacteria	c__Cyanobacteriia	o__Chloroplast	f__Morus indica	g__	s__
ASV203905	k__Bacteria	p__Cyanobacteria	c__Cyanobacteriia	o__Chloroplast	f__	g__	s__
ASV203996	k__Bacteria	p__Cyanobacteria	c__Cyanobacteriia	o__Chloroplast	f__	g__	s__
ASV204185	k__Bacteria	p__Cyanobacteria	c__Cyanobacteriia	o__Chloroplast	f__Coccomyxa simplex	g__	s__
ASV204321	k__Bacteria	p__Cyanobacteria	c__Cyanobacteriia	o__Chloroplast	f__Calycanthus floridus var. glaucus	g__	s__
ASV204340	k__Bacteria	p__Cyanobacteria	c__Cyanobacteriia	o__Chloroplast	f__Sanionia uncinata	g__	s__
ASV204354	k__Bacteria	p__Cyanobacteria	c__Cyanobacteriia	o__Chloroplast	f__	g__	s__
ASV204459	k__Bacteria	p__Cyanobacteria	c__Cyanobacteriia	o__Chloroplast	f__Morus indica	g__	s__
ASV204610	k__Bacteria	p__Cyanobacteria	c__Cyanobacteriia	o__Chloroplast	f__	g__	s__
ASV204739	k__Bacteria	p__Cyanobacteria	c__Cyanobacteriia	o__Chloroplast	f__	g__	s__
ASV204801	k__Bacteria	p__Cyanobacteria	c__Cyanobacteriia	o__Chloroplast	f__	g__	s__
ASV205126	k__Bacteria	p__Cyanobacteria	c__Cyanobacteriia	o__Chloroplast	f__Coccomyxa viridis	g__	s__
ASV205172	k__Bacteria	p__Cyanobacteria	c__Cyanobacteriia	o__Chloroplast	f__Morus indica	g__	s__
ASV205283	k__Bacteria	p__Cyanobacteria	c__Cyanobacteriia	o__Chloroplast	f__Picea glauca (white spruce)	g__	s__
ASV205291	k__Bacteria	p__Cyanobacteria	c__Cyanobacteriia	o__Chloroplast	f__Coccomyxa viridis	g__	s__
ASV205313	k__Bacteria	p__Cyanobacteria	c__Cyanobacteriia	o__Chloroplast	f__Picea glauca (white spruce)	g__	s__
ASV205474	k__Bacteria	p__Cyanobacteria	c__Cyanobacteriia	o__Chloroplast	f__	g__	s__
ASV205623	k__Bacteria	p__Cyanobacteria	c__Cyanobacteriia	o__Chloroplast	f__Morus indica	g__	s__
ASV205629	k__Bacteria	p__Cyanobacteria	c__Cyanobacteriia	o__Chloroplast	f__	g__	s__
ASV205655	k__Bacteria	p__Cyanobacteria	c__Cyanobacteriia	o__Chloroplast	f__Morus indica	g__	s__
ASV205827	k__Bacteria	p__Cyanobacteria	c__Cyanobacteriia	o__Chloroplast	f__Nicotiana tabacum (common tobacco)	g__	s__
ASV205871	k__Bacteria	p__Cyanobacteria	c__Cyanobacteriia	o__Chloroplast	f__Morus indica	g__	s__
ASV205923	k__Bacteria	p__Cyanobacteria	c__Cyanobacteriia	o__Chloroplast	f__Nicotiana tabacum (common tobacco)	g__	s__
ASV206262	k__Bacteria	p__Cyanobacteria	c__Cyanobacteriia	o__Chloroplast	f__	g__	s__
ASV206319	k__Bacteria	p__Cyanobacteria	c__Cyanobacteriia	o__Chloroplast	f__Castanea mollissima (Chinese chestnut)	g__	s__
ASV206327	k__Bacteria	p__Cyanobacteria	c__Cyanobacteriia	o__Chloroplast	f__Amborella trichopoda	g__	s__
ASV206435	k__Bacteria	p__Cyanobacteria	c__Cyanobacteriia	o__Chloroplast	f__	g__	s__
ASV206447	k__Bacteria	p__Cyanobacteria	c__Cyanobacteriia	o__Chloroplast	f__Morus indica	g__	s__
ASV207002	k__Bacteria	p__Cyanobacteria	c__Cyanobacteriia	o__Chloroplast	f__Picea glauca (white spruce)	g__	s__
ASV207304	k__Bacteria	p__Cyanobacteria	c__Cyanobacteriia	o__Chloroplast	f__	g__	s__
ASV207474	k__Bacteria	p__Cyanobacteria	c__Cyanobacteriia	o__Chloroplast	f__Morus indica	g__	s__
ASV207513	k__Bacteria	p__Cyanobacteria	c__Cyanobacteriia	o__Chloroplast	f__	g__	s__
ASV207536	k__Bacteria	p__Cyanobacteria	c__Cyanobacteriia	o__Chloroplast	f__Hydra vulgaris	g__	s__
ASV207724	k__Bacteria	p__Cyanobacteria	c__Cyanobacteriia	o__Chloroplast	f__Castanea mollissima (Chinese chestnut)	g__	s__
ASV207887	k__Bacteria	p__Cyanobacteria	c__Cyanobacteriia	o__Chloroplast	f__Dryopteris fragrans	g__	s__
ASV207990	k__Bacteria	p__Cyanobacteria	c__Cyanobacteriia	o__Chloroplast	f__Castanea mollissima (Chinese chestnut)	g__	s__
ASV208233	k__Bacteria	p__Cyanobacteria	c__Cyanobacteriia	o__Chloroplast	f__Hydra vulgaris	g__	s__
ASV208235	k__Bacteria	p__Cyanobacteria	c__Cyanobacteriia	o__Chloroplast	f__Coccomyxa simplex	g__	s__
ASV208255	k__Bacteria	p__Cyanobacteria	c__Cyanobacteriia	o__Chloroplast	f__Morus indica	g__	s__
ASV208283	k__Bacteria	p__Cyanobacteria	c__Cyanobacteriia	o__Chloroplast	f__Morus indica	g__	s__
ASV208343	k__Bacteria	p__Cyanobacteria	c__Cyanobacteriia	o__Chloroplast	f__	g__	s__
ASV208537	k__Bacteria	p__Cyanobacteria	c__Cyanobacteriia	o__Chloroplast	f__Eimeria praecox	g__	s__
ASV208603	k__Bacteria	p__Cyanobacteria	c__Cyanobacteriia	o__Chloroplast	f__Hydra vulgaris	g__	s__
ASV208697	k__Bacteria	p__Cyanobacteria	c__Cyanobacteriia	o__Chloroplast	f__	g__	s__
ASV208706	k__Bacteria	p__Cyanobacteria	c__Cyanobacteriia	o__Chloroplast	f__Elliptochloris bilobata	g__	s__
ASV208745	k__Bacteria	p__Cyanobacteria	c__Cyanobacteriia	o__Chloroplast	f__Morus indica	g__	s__
ASV208956	k__Bacteria	p__Cyanobacteria	c__Cyanobacteriia	o__Chloroplast	f__Morus indica	g__	s__
ASV208958	k__Bacteria	p__Cyanobacteria	c__Cyanobacteriia	o__Chloroplast	f__Nicotiana tabacum (common tobacco)	g__	s__
ASV208990	k__Bacteria	p__Cyanobacteria	c__Cyanobacteriia	o__Chloroplast	f__Morus indica	g__	s__
ASV209124	k__Bacteria	p__Cyanobacteria	c__Cyanobacteriia	o__Chloroplast	f__Morus indica	g__	s__
ASV209142	k__Bacteria	p__Cyanobacteria	c__Cyanobacteriia	o__Chloroplast	f__	g__	s__
ASV209257	k__Bacteria	p__Cyanobacteria	c__Cyanobacteriia	o__Chloroplast	f__Nicotiana tabacum (common tobacco)	g__	s__
ASV209311	k__Bacteria	p__Cyanobacteria	c__Cyanobacteriia	o__Chloroplast	f__Vaccinium macrocarpon	g__	s__
ASV209496	k__Bacteria	p__Cyanobacteria	c__Cyanobacteriia	o__Chloroplast	f__Coccomyxa simplex	g__	s__
ASV209533	k__Bacteria	p__Cyanobacteria	c__Cyanobacteriia	o__Chloroplast	f__Betula pendula (European white birch)	g__	s__
ASV209677	k__Bacteria	p__Cyanobacteria	c__Cyanobacteriia	o__Chloroplast	f__Morus indica	g__	s__
ASV209945	k__Bacteria	p__Cyanobacteria	c__Cyanobacteriia	o__Chloroplast	f__	g__	s__
ASV210115	k__Bacteria	p__Cyanobacteria	c__Cyanobacteriia	o__Chloroplast	f__Morus indica	g__	s__
ASV210358	k__Bacteria	p__Cyanobacteria	c__Cyanobacteriia	o__Chloroplast	f__Morus indica	g__	s__
ASV210391	k__Bacteria	p__Cyanobacteria	c__Cyanobacteriia	o__Chloroplast	f__Morus indica	g__	s__
ASV210543	k__Bacteria	p__Cyanobacteria	c__Cyanobacteriia	o__Chloroplast	f__	g__	s__
ASV210866	k__Bacteria	p__Cyanobacteria	c__Cyanobacteriia	o__Chloroplast	f__Coccomyxa viridis	g__	s__
ASV211134	k__Bacteria	p__Cyanobacteria	c__Cyanobacteriia	o__Chloroplast	f__	g__	s__
ASV211346	k__Bacteria	p__Cyanobacteria	c__Cyanobacteriia	o__Chloroplast	f__Citrus sinensis (sweet orange)	g__	s__
ASV211541	k__Bacteria	p__Cyanobacteria	c__Cyanobacteriia	o__Chloroplast	f__Castanea mollissima (Chinese chestnut)	g__	s__
ASV211556	k__Bacteria	p__Cyanobacteria	c__Cyanobacteriia	o__Chloroplast	f__Elliptochloris bilobata	g__	s__
ASV211588	k__Bacteria	p__Cyanobacteria	c__Cyanobacteriia	o__Chloroplast	f__	g__	s__
ASV211662	k__Bacteria	p__Cyanobacteria	c__Cyanobacteriia	o__Chloroplast	f__Castanea mollissima (Chinese chestnut)	g__	s__
ASV211738	k__Bacteria	p__Cyanobacteria	c__Cyanobacteriia	o__Chloroplast	f__Morus indica	g__	s__
ASV211748	k__Bacteria	p__Cyanobacteria	c__Cyanobacteriia	o__Chloroplast	f__Morus indica	g__	s__
ASV211782	k__Bacteria	p__Cyanobacteria	c__Cyanobacteriia	o__Chloroplast	f__Hydra vulgaris	g__	s__
ASV211947	k__Bacteria	p__Cyanobacteria	c__Cyanobacteriia	o__Chloroplast	f__Hydra vulgaris	g__	s__
ASV212038	k__Bacteria	p__Cyanobacteria	c__Cyanobacteriia	o__Chloroplast	f__Nicotiana tabacum (common tobacco)	g__	s__
ASV212149	k__Bacteria	p__Cyanobacteria	c__Cyanobacteriia	o__Chloroplast	f__Closteriopsis acicularis	g__	s__
ASV212173	k__Bacteria	p__Cyanobacteria	c__Cyanobacteriia	o__Chloroplast	f__	g__	s__
ASV212412	k__Bacteria	p__Cyanobacteria	c__Cyanobacteriia	o__Chloroplast	f__	g__	s__
ASV212565	k__Bacteria	p__Cyanobacteria	c__Cyanobacteriia	o__Chloroplast	f__Castanea mollissima (Chinese chestnut)	g__	s__
ASV212630	k__Bacteria	p__Cyanobacteria	c__Cyanobacteriia	o__Chloroplast	f__	g__	s__
ASV212667	k__Bacteria	p__Cyanobacteria	c__Cyanobacteriia	o__Chloroplast	f__Nicotiana tabacum (common tobacco)	g__	s__
ASV212675	k__Bacteria	p__Cyanobacteria	c__Cyanobacteriia	o__Chloroplast	f__Hydra vulgaris	g__	s__
ASV212709	k__Bacteria	p__Cyanobacteria	c__Cyanobacteriia	o__Chloroplast	f__Chlorella pyrenoidosa	g__	s__
ASV212902	k__Bacteria	p__Cyanobacteria	c__Cyanobacteriia	o__Chloroplast	f__	g__	s__
ASV212930	k__Bacteria	p__Cyanobacteria	c__Cyanobacteriia	o__Chloroplast	f__	g__	s__
ASV213087	k__Bacteria	p__Cyanobacteria	c__Cyanobacteriia	o__Chloroplast	f__Nicotiana tabacum (common tobacco)	g__	s__
ASV213246	k__Bacteria	p__Cyanobacteria	c__Cyanobacteriia	o__Chloroplast	f__Calycanthus floridus var. glaucus	g__	s__
ASV213301	k__Bacteria	p__Cyanobacteria	c__Cyanobacteriia	o__Chloroplast	f__Nicotiana tabacum (common tobacco)	g__	s__
ASV213364	k__Bacteria	p__Cyanobacteria	c__Cyanobacteriia	o__Chloroplast	f__	g__	s__
ASV213857	k__Bacteria	p__Cyanobacteria	c__Cyanobacteriia	o__Chloroplast	f__Sphagnum angustifolium	g__	s__
ASV214048	k__Bacteria	p__Cyanobacteria	c__Cyanobacteriia	o__Chloroplast	f__Solanum melongena (eggplant)	g__	s__
ASV214198	k__Bacteria	p__Cyanobacteria	c__Cyanobacteriia	o__Chloroplast	f__	g__	s__
ASV214237	k__Bacteria	p__Cyanobacteria	c__Cyanobacteriia	o__Chloroplast	f__	g__	s__
ASV214304	k__Bacteria	p__Cyanobacteria	c__Cyanobacteriia	o__Chloroplast	f__Nicotiana tabacum (common tobacco)	g__	s__
ASV214467	k__Bacteria	p__Cyanobacteria	c__Cyanobacteriia	o__Chloroplast	f__	g__	s__
ASV214512	k__Bacteria	p__Cyanobacteria	c__Cyanobacteriia	o__Chloroplast	f__	g__	s__
ASV214616	k__Bacteria	p__Cyanobacteria	c__Cyanobacteriia	o__Chloroplast	f__Morus indica	g__	s__
ASV214855	k__Bacteria	p__Cyanobacteria	c__Cyanobacteriia	o__Chloroplast	f__	g__	s__
ASV214938	k__Bacteria	p__Cyanobacteria	c__Cyanobacteriia	o__Chloroplast	f__	g__	s__
ASV215023	k__Bacteria	p__Cyanobacteria	c__Cyanobacteriia	o__Chloroplast	f__Morus indica	g__	s__
ASV215157	k__Bacteria	p__Cyanobacteria	c__Cyanobacteriia	o__Chloroplast	f__	g__	s__
ASV215186	k__Bacteria	p__Cyanobacteria	c__Cyanobacteriia	o__Chloroplast	f__	g__	s__
ASV215252	k__Bacteria	p__Cyanobacteria	c__Cyanobacteriia	o__Chloroplast	f__Coccomyxa simplex	g__	s__
ASV215255	k__Bacteria	p__Cyanobacteria	c__Cyanobacteriia	o__Chloroplast	f__Betula pendula (European white birch)	g__	s__
ASV215444	k__Bacteria	p__Cyanobacteria	c__Cyanobacteriia	o__Chloroplast	f__Chlorella sp. CC-Bw-9	g__	s__
ASV215451	k__Bacteria	p__Cyanobacteria	c__Cyanobacteriia	o__Chloroplast	f__Pseudochlorella pringsheimii	g__	s__
ASV215523	k__Bacteria	p__Cyanobacteria	c__Cyanobacteriia	o__Chloroplast	f__Morus indica	g__	s__
ASV215667	k__Bacteria	p__Cyanobacteria	c__Cyanobacteriia	o__Chloroplast	f__	g__	s__
ASV215739	k__Bacteria	p__Cyanobacteria	c__Cyanobacteriia	o__Chloroplast	f__Morus indica	g__	s__
ASV215759	k__Bacteria	p__Cyanobacteria	c__Cyanobacteriia	o__Chloroplast	f__	g__	s__
ASV215853	k__Bacteria	p__Cyanobacteria	c__Cyanobacteriia	o__Chloroplast	f__Coccomyxa simplex	g__	s__
ASV216085	k__Bacteria	p__Cyanobacteria	c__Cyanobacteriia	o__Chloroplast	f__	g__	s__
ASV216162	k__Bacteria	p__Cyanobacteria	c__Cyanobacteriia	o__Chloroplast	f__Dryopteris fragrans	g__	s__
ASV216491	k__Bacteria	p__Cyanobacteria	c__Cyanobacteriia	o__Chloroplast	f__Nicotiana tabacum (common tobacco)	g__	s__
ASV216499	k__Bacteria	p__Cyanobacteria	c__Cyanobacteriia	o__Chloroplast	f__	g__	s__
ASV216519	k__Bacteria	p__Cyanobacteria	c__Cyanobacteriia	o__Chloroplast	f__Morus indica	g__	s__
ASV216630	k__Bacteria	p__Cyanobacteria	c__Cyanobacteriia	o__Chloroplast	f__Morus indica	g__	s__
ASV216689	k__Bacteria	p__Cyanobacteria	c__Cyanobacteriia	o__Chloroplast	f__Chlorella sp. CC-Bw-9	g__	s__
ASV216862	k__Bacteria	p__Cyanobacteria	c__Cyanobacteriia	o__Chloroplast	f__Morus indica	g__	s__
ASV216947	k__Bacteria	p__Cyanobacteria	c__Cyanobacteriia	o__Chloroplast	f__	g__	s__
ASV217136	k__Bacteria	p__Cyanobacteria	c__Cyanobacteriia	o__Chloroplast	f__	g__	s__
ASV217209	k__Bacteria	p__Cyanobacteria	c__Cyanobacteriia	o__Chloroplast	f__Morus indica	g__	s__
ASV217234	k__Bacteria	p__Cyanobacteria	c__Cyanobacteriia	o__Chloroplast	f__Nicotiana tabacum (common tobacco)	g__	s__
ASV217290	k__Bacteria	p__Cyanobacteria	c__Cyanobacteriia	o__Chloroplast	f__Nicotiana tabacum (common tobacco)	g__	s__
ASV217433	k__Bacteria	p__Cyanobacteria	c__Cyanobacteriia	o__Chloroplast	f__	g__	s__
ASV217532	k__Bacteria	p__Cyanobacteria	c__Cyanobacteriia	o__Chloroplast	f__Morus indica	g__	s__
ASV217582	k__Bacteria	p__Cyanobacteria	c__Cyanobacteriia	o__Chloroplast	f__Morus indica	g__	s__
ASV217742	k__Bacteria	p__Cyanobacteria	c__Cyanobacteriia	o__Chloroplast	f__Sanionia uncinata	g__	s__
ASV217813	k__Bacteria	p__Cyanobacteria	c__Cyanobacteriia	o__Chloroplast	f__Dryopteris fragrans	g__	s__
ASV218275	k__Bacteria	p__Cyanobacteria	c__Cyanobacteriia	o__Chloroplast	f__Castanea mollissima (Chinese chestnut)	g__	s__
ASV218298	k__Bacteria	p__Cyanobacteria	c__Cyanobacteriia	o__Chloroplast	f__Hydra vulgaris	g__	s__
ASV218410	k__Bacteria	p__Cyanobacteria	c__Cyanobacteriia	o__Chloroplast	f__Dryopteris fragrans	g__	s__
ASV218430	k__Bacteria	p__Cyanobacteria	c__Cyanobacteriia	o__Chloroplast	f__Daucus carota (carrot)	g__	s__
ASV218685	k__Bacteria	p__Cyanobacteria	c__Cyanobacteriia	o__Chloroplast	f__Daucus carota (carrot)	g__	s__
ASV218886	k__Bacteria	p__Cyanobacteria	c__Cyanobacteriia	o__Chloroplast	f__Dryopteris fragrans	g__	s__
ASV219054	k__Bacteria	p__Cyanobacteria	c__Cyanobacteriia	o__Chloroplast	f__Watanabea reniformis	g__	s__
ASV219165	k__Bacteria	p__Cyanobacteria	c__Cyanobacteriia	o__Chloroplast	f__Gossypium arboreum	g__	s__
ASV219173	k__Bacteria	p__Cyanobacteria	c__Cyanobacteriia	o__Chloroplast	f__Morus indica	g__	s__
ASV219209	k__Bacteria	p__Cyanobacteria	c__Cyanobacteriia	o__Chloroplast	f__	g__	s__
ASV219334	k__Bacteria	p__Cyanobacteria	c__Cyanobacteriia	o__Chloroplast	f__Calycanthus floridus var. glaucus	g__	s__
ASV219385	k__Bacteria	p__Cyanobacteria	c__Cyanobacteriia	o__Chloroplast	f__Bracteacoccus aerius	g__	s__
ASV219388	k__Bacteria	p__Cyanobacteria	c__Cyanobacteriia	o__Chloroplast	f__	g__	s__
ASV219614	k__Bacteria	p__Cyanobacteria	c__Cyanobacteriia	o__Chloroplast	f__	g__	s__
ASV219717	k__Bacteria	p__Cyanobacteria	c__Cyanobacteriia	o__Chloroplast	f__Chlorella vulgaris	g__	s__
ASV219795	k__Bacteria	p__Cyanobacteria	c__Cyanobacteriia	o__Chloroplast	f__	g__	s__
ASV219869	k__Bacteria	p__Cyanobacteria	c__Cyanobacteriia	o__Chloroplast	f__Nicotiana tabacum (common tobacco)	g__	s__
ASV219884	k__Bacteria	p__Cyanobacteria	c__Cyanobacteriia	o__Chloroplast	f__	g__	s__
ASV220010	k__Bacteria	p__Cyanobacteria	c__Cyanobacteriia	o__Chloroplast	f__Morus indica	g__	s__
ASV220304	k__Bacteria	p__Cyanobacteria	c__Cyanobacteriia	o__Chloroplast	f__Dryopteris fragrans	g__	s__
ASV220317	k__Bacteria	p__Cyanobacteria	c__Cyanobacteriia	o__Chloroplast	f__Nicotiana tabacum (common tobacco)	g__	s__
ASV220457	k__Bacteria	p__Cyanobacteria	c__Cyanobacteriia	o__Chloroplast	f__	g__	s__
ASV220468	k__Bacteria	p__Cyanobacteria	c__Cyanobacteriia	o__Chloroplast	f__Castanea mollissima (Chinese chestnut)	g__	s__
ASV220500	k__Bacteria	p__Cyanobacteria	c__Cyanobacteriia	o__Chloroplast	f__Morus indica	g__	s__
ASV220545	k__Bacteria	p__Cyanobacteria	c__Cyanobacteriia	o__Chloroplast	f__	g__	s__
ASV220592	k__Bacteria	p__Cyanobacteria	c__Cyanobacteriia	o__Chloroplast	f__Castanea mollissima (Chinese chestnut)	g__	s__
ASV220810	k__Bacteria	p__Cyanobacteria	c__Cyanobacteriia	o__Chloroplast	f__Elliptochloris bilobata	g__	s__
ASV220888	k__Bacteria	p__Cyanobacteria	c__Cyanobacteriia	o__Chloroplast	f__Castanea mollissima (Chinese chestnut)	g__	s__
ASV220947	k__Bacteria	p__Cyanobacteria	c__Cyanobacteriia	o__Chloroplast	f__Dryopteris fragrans	g__	s__
ASV221101	k__Bacteria	p__Cyanobacteria	c__Cyanobacteriia	o__Chloroplast	f__Hydra vulgaris	g__	s__
ASV221153	k__Bacteria	p__Cyanobacteria	c__Cyanobacteriia	o__Chloroplast	f__Morus indica	g__	s__
ASV221182	k__Bacteria	p__Cyanobacteria	c__Cyanobacteriia	o__Chloroplast	f__Hydra vulgaris	g__	s__
ASV221351	k__Bacteria	p__Cyanobacteria	c__Cyanobacteriia	o__Chloroplast	f__Hydra vulgaris	g__	s__
ASV221370	k__Bacteria	p__Cyanobacteria	c__Cyanobacteriia	o__Chloroplast	f__Morus indica	g__	s__
ASV221798	k__Bacteria	p__Cyanobacteria	c__Cyanobacteriia	o__Chloroplast	f__	g__	s__
ASV221815	k__Bacteria	p__Cyanobacteria	c__Cyanobacteriia	o__Chloroplast	f__	g__	s__
ASV221887	k__Bacteria	p__Cyanobacteria	c__Cyanobacteriia	o__Chloroplast	f__	g__	s__
ASV222056	k__Bacteria	p__Cyanobacteria	c__Cyanobacteriia	o__Chloroplast	f__	g__	s__
ASV222144	k__Bacteria	p__Cyanobacteria	c__Cyanobacteriia	o__Chloroplast	f__Gossypium arboreum	g__	s__
ASV222374	k__Bacteria	p__Cyanobacteria	c__Cyanobacteriia	o__Chloroplast	f__Elliptochloris bilobata	g__	s__
ASV222739	k__Bacteria	p__Cyanobacteria	c__Cyanobacteriia	o__Chloroplast	f__	g__	s__
ASV222831	k__Bacteria	p__Cyanobacteria	c__Cyanobacteriia	o__Chloroplast	f__Picea glauca (white spruce)	g__	s__
ASV222835	k__Bacteria	p__Cyanobacteria	c__Cyanobacteriia	o__Chloroplast	f__	g__	s__
ASV222945	k__Bacteria	p__Cyanobacteria	c__Cyanobacteriia	o__Chloroplast	f__Coccomyxa viridis	g__	s__
ASV223103	k__Bacteria	p__Cyanobacteria	c__Cyanobacteriia	o__Chloroplast	f__Elliptochloris bilobata	g__	s__
ASV223284	k__Bacteria	p__Cyanobacteria	c__Cyanobacteriia	o__Chloroplast	f__Morus indica	g__	s__
ASV223304	k__Bacteria	p__Cyanobacteria	c__Cyanobacteriia	o__Chloroplast	f__Vaccinium macrocarpon	g__	s__
ASV223401	k__Bacteria	p__Cyanobacteria	c__Cyanobacteriia	o__Chloroplast	f__	g__	s__
ASV223587	k__Bacteria	p__Cyanobacteria	c__Cyanobacteriia	o__Chloroplast	f__Calycanthus floridus var. glaucus	g__	s__
ASV223612	k__Bacteria	p__Cyanobacteria	c__Cyanobacteriia	o__Chloroplast	f__Elliptochloris bilobata	g__	s__
ASV223650	k__Bacteria	p__Cyanobacteria	c__Cyanobacteriia	o__Chloroplast	f__Morus indica	g__	s__
ASV223836	k__Bacteria	p__Cyanobacteria	c__Cyanobacteriia	o__Chloroplast	f__Elliptochloris bilobata	g__	s__
ASV223971	k__Bacteria	p__Cyanobacteria	c__Cyanobacteriia	o__Chloroplast	f__	g__	s__
ASV224082	k__Bacteria	p__Cyanobacteria	c__Cyanobacteriia	o__Chloroplast	f__Chloromonas perforata	g__	s__
ASV224402	k__Bacteria	p__Cyanobacteria	c__Cyanobacteriia	o__Chloroplast	f__Castanea mollissima (Chinese chestnut)	g__	s__
ASV224545	k__Bacteria	p__Cyanobacteria	c__Cyanobacteriia	o__Chloroplast	f__Nicotiana tabacum (common tobacco)	g__	s__
ASV224668	k__Bacteria	p__Cyanobacteria	c__Cyanobacteriia	o__Chloroplast	f__	g__	s__
ASV224720	k__Bacteria	p__Cyanobacteria	c__Cyanobacteriia	o__Chloroplast	f__Morus indica	g__	s__
ASV224750	k__Bacteria	p__Cyanobacteria	c__Cyanobacteriia	o__Chloroplast	f__	g__	s__
ASV224884	k__Bacteria	p__Cyanobacteria	c__Cyanobacteriia	o__Chloroplast	f__Nicotiana tabacum (common tobacco)	g__	s__
ASV225017	k__Bacteria	p__Cyanobacteria	c__Cyanobacteriia	o__Chloroplast	f__Symbiochloris handae	g__	s__
ASV225064	k__Bacteria	p__Cyanobacteria	c__Cyanobacteriia	o__Chloroplast	f__Gloeotilopsis sterilis	g__	s__
ASV225365	k__Bacteria	p__Cyanobacteria	c__Cyanobacteriia	o__Chloroplast	f__Morus indica	g__	s__
ASV225479	k__Bacteria	p__Cyanobacteria	c__Cyanobacteriia	o__Chloroplast	f__	g__	s__
ASV225544	k__Bacteria	p__Cyanobacteria	c__Cyanobacteriia	o__Chloroplast	f__Bracteacoccus minor	g__	s__
ASV225548	k__Bacteria	p__Cyanobacteria	c__Cyanobacteriia	o__Chloroplast	f__Coccomyxa simplex	g__	s__
ASV225624	k__Bacteria	p__Cyanobacteria	c__Cyanobacteriia	o__Chloroplast	f__	g__	s__
ASV225676	k__Bacteria	p__Cyanobacteria	c__Cyanobacteriia	o__Chloroplast	f__Gossypium arboreum	g__	s__
ASV225698	k__Bacteria	p__Cyanobacteria	c__Cyanobacteriia	o__Chloroplast	f__Nicotiana tabacum (common tobacco)	g__	s__
ASV225900	k__Bacteria	p__Cyanobacteria	c__Cyanobacteriia	o__Chloroplast	f__Nicotiana tabacum (common tobacco)	g__	s__
ASV226055	k__Bacteria	p__Cyanobacteria	c__Cyanobacteriia	o__Chloroplast	f__Castanea mollissima (Chinese chestnut)	g__	s__
ASV226081	k__Bacteria	p__Cyanobacteria	c__Cyanobacteriia	o__Chloroplast	f__	g__	s__
ASV226248	k__Bacteria	p__Cyanobacteria	c__Cyanobacteriia	o__Chloroplast	f__Elliptochloris bilobata	g__	s__
ASV226409	k__Bacteria	p__Cyanobacteria	c__Cyanobacteriia	o__Chloroplast	f__Coccomyxa simplex	g__	s__
ASV226472	k__Bacteria	p__Cyanobacteria	c__Cyanobacteriia	o__Chloroplast	f__	g__	s__
ASV226504	k__Bacteria	p__Cyanobacteria	c__Cyanobacteriia	o__Chloroplast	f__Vaccinium macrocarpon	g__	s__
ASV226932	k__Bacteria	p__Cyanobacteria	c__Cyanobacteriia	o__Chloroplast	f__	g__	s__
ASV226948	k__Bacteria	p__Cyanobacteria	c__Cyanobacteriia	o__Chloroplast	f__	g__	s__
ASV227460	k__Bacteria	p__Cyanobacteria	c__Cyanobacteriia	o__Chloroplast	f__Elliptochloris bilobata	g__	s__
ASV227564	k__Bacteria	p__Cyanobacteria	c__Cyanobacteriia	o__Chloroplast	f__Nicotiana tabacum (common tobacco)	g__	s__
ASV227650	k__Bacteria	p__Cyanobacteria	c__Cyanobacteriia	o__Chloroplast	f__	g__	s__
ASV227663	k__Bacteria	p__Cyanobacteria	c__Cyanobacteriia	o__Chloroplast	f__Dryopteris fragrans	g__	s__
ASV227820	k__Bacteria	p__Cyanobacteria	c__Cyanobacteriia	o__Chloroplast	f__Morus indica	g__	s__
ASV227923	k__Bacteria	p__Cyanobacteria	c__Cyanobacteriia	o__Chloroplast	f__Elliptochloris bilobata	g__	s__
ASV227932	k__Bacteria	p__Cyanobacteria	c__Cyanobacteriia	o__Chloroplast	f__Hydra vulgaris	g__	s__
ASV228006	k__Bacteria	p__Cyanobacteria	c__Cyanobacteriia	o__Chloroplast	f__	g__	s__
ASV228020	k__Bacteria	p__Cyanobacteria	c__Cyanobacteriia	o__Chloroplast	f__Panax ginseng	g__	s__
ASV228114	k__Bacteria	p__Cyanobacteria	c__Cyanobacteriia	o__Chloroplast	f__	g__	s__
ASV228498	k__Bacteria	p__Cyanobacteria	c__Cyanobacteriia	o__Chloroplast	f__Watanabea reniformis	g__	s__
ASV228544	k__Bacteria	p__Cyanobacteria	c__Cyanobacteriia	o__Chloroplast	f__Coccomyxa simplex	g__	s__
ASV228685	k__Bacteria	p__Cyanobacteria	c__Cyanobacteriia	o__Chloroplast	f__Morus indica	g__	s__
ASV228874	k__Bacteria	p__Cyanobacteria	c__Cyanobacteriia	o__Chloroplast	f__Morus indica	g__	s__
ASV228920	k__Bacteria	p__Cyanobacteria	c__Cyanobacteriia	o__Chloroplast	f__Castanea mollissima (Chinese chestnut)	g__	s__
ASV229174	k__Bacteria	p__Cyanobacteria	c__Cyanobacteriia	o__Chloroplast	f__Castanea mollissima (Chinese chestnut)	g__	s__
ASV229175	k__Bacteria	p__Cyanobacteria	c__Cyanobacteriia	o__Chloroplast	f__	g__	s__
ASV229658	k__Bacteria	p__Cyanobacteria	c__Cyanobacteriia	o__Chloroplast	f__	g__	s__
ASV229666	k__Bacteria	p__Cyanobacteria	c__Cyanobacteriia	o__Chloroplast	f__Picea glauca (white spruce)	g__	s__
ASV229776	k__Bacteria	p__Cyanobacteria	c__Cyanobacteriia	o__Chloroplast	f__	g__	s__
[truncated: 2,728 more rows]

## Sheet: 7_generalists_all
	Kingdom	Phylum	Class	Order	Family	Genus	Species
ASV000005	k__Bacteria	p__Firmicutes	c__Bacilli	o__Lactobacillales	f__Streptococcaceae	g__Lactococcus	s__Lactococcus lactis
ASV000017	k__Bacteria	p__Proteobacteria	c__Gammaproteobacteria	o__Enterobacterales	f__Enterobacteriaceae	g__Escherichia-Shigella	s__Escherichia marmotae
ASV000053	k__Bacteria	p__Proteobacteria	c__Gammaproteobacteria	o__Enterobacterales	f__Enterobacteriaceae	g__Escherichia-Shigella	s__Escherichia coli
ASV000156	k__Bacteria	p__Proteobacteria	c__Gammaproteobacteria	o__Pseudomonadales	f__Pseudomonadaceae	g__Pseudomonas	s__Pseudomonas yamanorum
[truncated: 21 more rows]

## Sheet: 8_generalists_bird
	Kingdom	Phylum	Class	Order	Family	Genus	Species
[truncated: 32 more rows]

## Sheet: 9_coverage
Good's coverage of each samples
SampleID	Good's Coverage
[truncated: 339 more rows]

[truncated: 26 more sheets: 10_host_taxa, 11_country, 12_age_gender, 13_core_taxa, 14_human_pathogen_blackbird, 15_human_pathogen_mallard, 16_human_pathogens_bat, 17_human_pathogen_woodpigeon, 18_plant_pathogens, 19_pathogen_list, 20_ASV_black, 21_ASV_mallard, 22_ASV_wood, 23_ASV_bat, 24_read_black, 25_read_mallard, 26_read_wood, 27_read_bat, 28_prop_pathogen_host_asv, 29_prop_pathogen_host_reads …]
