# Supplementary material for: Pathogenic taxa constitute a substantial portion of bat and wild bird fecal bacterial microbiota
Source: Research Square preprint supplement (doi:10.21203/rs.3.rs-3619162/v1), 2023-11-28
Supplement: Supplementary file 2 [file 7249fc11d48394bcc4dbef20.xlsx]

## Sheet: 36_black_pathogen_asv_relab
ASV ID	Sample ID	Relative abundance	Date	Year	Season	Country	Site_name	Latitude	Longitude	Gender	Age	Kingdom	Phylum	Class	Order	Family	Genus	Species
ASV000012	LV47	0.875	30.9.2020	2020	Autumn	Latvia	Pape	56.1625	21.0656	Female	Young	k__Bacteria	p__Campylobacterota	c__Campylobacteria	o__Campylobacterales	f__Helicobacteraceae	g__Helicobacter	s__Helicobacter anseris					Relative abundance value >0.2
ASV000003	14_vantaa	0.718	1.10.2020	2020	Autumn	Finland	Lansinnatus	60.249	25.118	Male	Adult	k__Bacteria	p__Campylobacterota	c__Campylobacteria	o__Campylobacterales	f__Campylobacteraceae	g__Campylobacter	s__Campylobacter jejuni subsp. jejuni LMG 23211
ASV000028	A810983	0.684	23.3.2021	2021	Spring	Finland	Hanko	59.8283	22.9659	Male	Adult	k__Bacteria	p__Campylobacterota	c__Campylobacteria	o__Campylobacterales	f__Campylobacteraceae	g__Campylobacter	s__Campylobacter jejuni					Pathogen bloomer samples
ASV000017	LV29	0.676	23.9.2020	2020	Autumn	Latvia	Pape	56.1625	21.0656	Female	Young	k__Bacteria	p__Proteobacteria	c__Gammaproteobacteria	o__Enterobacterales	f__Enterobacteriaceae	g__Escherichia-Shigella	s__Escherichia marmotae
ASV000003	LV24	0.634	20.9.2020	2020	Autumn	Latvia	Pape	56.1625	21.0656	Male	Adult	k__Bacteria	p__Campylobacterota	c__Campylobacteria	o__Campylobacterales	f__Campylobacteraceae	g__Campylobacter	s__Campylobacter jejuni subsp. jejuni LMG 23211
ASV000003	15_denmark	0.632	20.9.2020	2020	Autumn	Denmark	Hjulby	55.3422	Oct.66	Male	Young	k__Bacteria	p__Campylobacterota	c__Campylobacteria	o__Campylobacterales	f__Campylobacteraceae	g__Campylobacter	s__Campylobacter jejuni subsp. jejuni LMG 23211
ASV000035	D28	0.591	31.5.2021	2021	Breeding	France	Chize forest	46.1201	0.4585	Male	Unknown	k__Bacteria	p__Firmicutes	c__Bacilli	o__Mycoplasmatales	f__Mycoplasmataceae	g__Mycoplasma	s__Malacoplasma microti
ASV000081	A686081	0.586	24.9.2020	2020	Autumn	Finland	Karjaa	60.0715	23.662	Male	Young	k__Bacteria	p__Campylobacterota	c__Campylobacteria	o__Campylobacterales	f__Campylobacteraceae	g__Campylobacter	s__Campylobacter jejuni subsp. jejuni LMG 23211
ASV000028	A810992	0.56	25.3.2021	2021	Spring	Finland	Hanko	59.8283	22.9659	Female	Adult	k__Bacteria	p__Campylobacterota	c__Campylobacteria	o__Campylobacterales	f__Campylobacteraceae	g__Campylobacter	s__Campylobacter jejuni
ASV000029	A809585	0.542	11.8.2020	2020	Breeding	Finland	Hanko	59.8283	22.9659	Male	Young	k__Bacteria	p__Campylobacterota	c__Campylobacteria	o__Campylobacterales	f__Helicobacteraceae	g__Helicobacter	s__Helicobacter sp. 'B52D Seymour'
ASV000029	A686083	0.48	25.9.2020	2020	Autumn	Finland	Karjaa	60.0715	23.662	Male	Young	k__Bacteria	p__Campylobacterota	c__Campylobacteria	o__Campylobacterales	f__Helicobacteraceae	g__Helicobacter	s__Helicobacter sp. 'B52D Seymour'
ASV000003	A686080	0.478	23.9.2020	2020	Autumn	Finland	Karjaa	60.0715	23.662	Male	Young	k__Bacteria	p__Campylobacterota	c__Campylobacteria	o__Campylobacterales	f__Campylobacteraceae	g__Campylobacter	s__Campylobacter jejuni subsp. jejuni LMG 23211
ASV000129	A686068	0.456	5.10.2020	2020	Autumn	Finland	Karjaa	60.0715	23.662	Male	Young	k__Bacteria	p__Campylobacterota	c__Campylobacteria	o__Campylobacterales	f__Helicobacteraceae	g__Helicobacter	s__Helicobacter sp. 'B52D Seymour'
ASV000012	LV09	0.451	17.9.2020	2020	Autumn	Latvia	Pape	56.1625	21.0656	Male	Young	k__Bacteria	p__Campylobacterota	c__Campylobacteria	o__Campylobacterales	f__Helicobacteraceae	g__Helicobacter	s__Helicobacter anseris
ASV000007	A810982	0.438	22.3.2021	2021	Spring	Finland	Hanko	59.8283	22.9659	Male	Adult	k__Bacteria	p__Proteobacteria	c__Gammaproteobacteria	o__Enterobacterales	f__Enterobacteriaceae	g__Escherichia-Shigella	s__Escherichia marmotae
ASV000008	9_chize	0.43	20.5.2021	2021	Breeding	France	Chize forest	46.1523	0.437	Male	Unknown	k__Bacteria	p__Campylobacterota	c__Campylobacteria	o__Campylobacterales	f__Campylobacteraceae	g__Campylobacter	s__Campylobacter sp. RM16704
ASV000007	8E13246	0.394	Unknown	2020	NA	Denmark	Tinning Mose	56.266	9.957	Female	Adult	k__Bacteria	p__Proteobacteria	c__Gammaproteobacteria	o__Enterobacterales	f__Enterobacteriaceae	g__Escherichia-Shigella	s__Escherichia marmotae
ASV000003	LV30	0.36	25.9.2020	2020	Autumn	Latvia	Pape	56.1625	21.0656	Female	Young	k__Bacteria	p__Campylobacterota	c__Campylobacteria	o__Campylobacterales	f__Campylobacteraceae	g__Campylobacter	s__Campylobacter jejuni subsp. jejuni LMG 23211
ASV000030	14_chize	0.357	31.5.2021	2021	Breeding	France	Chize forest	46.1523	0.437	Female	Unknown	k__Bacteria	p__Firmicutes	c__Bacilli	o__Mycoplasmatales	f__Mycoplasmataceae	g__Ureaplasma	s__
ASV000008	A810991	0.355	25.3.2021	2021	Spring	Finland	Hanko	59.8283	22.9659	Male	Adult	k__Bacteria	p__Campylobacterota	c__Campylobacteria	o__Campylobacterales	f__Campylobacteraceae	g__Campylobacter	s__Campylobacter sp. RM16704
ASV000007	LV30	0.345	25.9.2020	2020	Autumn	Latvia	Pape	56.1625	21.0656	Female	Young	k__Bacteria	p__Proteobacteria	c__Gammaproteobacteria	o__Enterobacterales	f__Enterobacteriaceae	g__Escherichia-Shigella	s__Escherichia marmotae
ASV000007	8_vantaa	0.336	2.9.2020	2020	Breeding	Finland	Lansinnatus	60.249	25.118	Male	Young	k__Bacteria	p__Proteobacteria	c__Gammaproteobacteria	o__Enterobacterales	f__Enterobacteriaceae	g__Escherichia-Shigella	s__Escherichia marmotae
ASV000003	8A85322	0.309	20.7.2020	2020	Breeding	Denmark	Tinning Mose	56.266	9.957	Female	Adult	k__Bacteria	p__Campylobacterota	c__Campylobacteria	o__Campylobacterales	f__Campylobacteraceae	g__Campylobacter	s__Campylobacter jejuni subsp. jejuni LMG 23211
ASV000007	A809582	0.308	9.8.2020	2020	Breeding	Finland	Hanko	59.8283	22.9659	Male	Young	k__Bacteria	p__Proteobacteria	c__Gammaproteobacteria	o__Enterobacterales	f__Enterobacteriaceae	g__Escherichia-Shigella	s__Escherichia marmotae
ASV000003	A686068	0.301	5.10.2020	2020	Autumn	Finland	Karjaa	60.0715	23.662	Male	Young	k__Bacteria	p__Campylobacterota	c__Campylobacteria	o__Campylobacterales	f__Campylobacteraceae	g__Campylobacter	s__Campylobacter jejuni subsp. jejuni LMG 23211
ASV000008	A810986	0.301	24.3.2021	2021	Spring	Finland	Hanko	59.8283	22.9659	Female	Adult	k__Bacteria	p__Campylobacterota	c__Campylobacteria	o__Campylobacterales	f__Campylobacteraceae	g__Campylobacter	s__Campylobacter sp. RM16704
ASV000087	16_denmark	0.297	22.9.2020	2020	Autumn	Denmark	Bagenkop	54.728	Oct.52	Male	Young	k__Bacteria	p__Proteobacteria	c__Gammaproteobacteria	o__Enterobacterales	f__Enterobacteriaceae	g__Escherichia-Shigella	s__Escherichia albertii
ASV000068	A686067	0.291	31.5.2020	2020	Breeding	Finland	Karjaa	60.0715	23.662	Male	Adult	k__Bacteria	p__Firmicutes	c__Bacilli	o__Mycoplasmatales	f__Mycoplasmataceae	g__Mycoplasma	s__Mycoplasma penetrans HF-2
ASV000008	A686067	0.276	31.5.2020	2020	Breeding	Finland	Karjaa	60.0715	23.662	Male	Adult	k__Bacteria	p__Campylobacterota	c__Campylobacteria	o__Campylobacterales	f__Campylobacteraceae	g__Campylobacter	s__Campylobacter sp. RM16704
ASV000030	A810988	0.271	24.3.2021	2021	Spring	Finland	Hanko	59.8283	22.9659	Male	Adult	k__Bacteria	p__Firmicutes	c__Bacilli	o__Mycoplasmatales	f__Mycoplasmataceae	g__Ureaplasma	s__
ASV000017	A810986	0.266	24.3.2021	2021	Spring	Finland	Hanko	59.8283	22.9659	Female	Adult	k__Bacteria	p__Proteobacteria	c__Gammaproteobacteria	o__Enterobacterales	f__Enterobacteriaceae	g__Escherichia-Shigella	s__Escherichia marmotae
ASV000008	14_chize	0.255	31.5.2021	2021	Breeding	France	Chize forest	46.1523	0.437	Female	Unknown	k__Bacteria	p__Campylobacterota	c__Campylobacteria	o__Campylobacterales	f__Campylobacteraceae	g__Campylobacter	s__Campylobacter sp. RM16704
ASV000003	LV02	0.246	21.8.2020	2020	Breeding	Latvia	Pape	56.1625	21.0656	Female	Young	k__Bacteria	p__Campylobacterota	c__Campylobacteria	o__Campylobacterales	f__Campylobacteraceae	g__Campylobacter	s__Campylobacter jejuni subsp. jejuni LMG 23211
ASV000028	A810991	0.241	25.3.2021	2021	Spring	Finland	Hanko	59.8283	22.9659	Male	Adult	k__Bacteria	p__Campylobacterota	c__Campylobacteria	o__Campylobacterales	f__Campylobacteraceae	g__Campylobacter	s__Campylobacter jejuni
ASV000035	VD_01	0.24	27.7.2020	2020	Breeding	Denmark	Tinning Mose	56.266	9.957	Female	Young	k__Bacteria	p__Firmicutes	c__Bacilli	o__Mycoplasmatales	f__Mycoplasmataceae	g__Mycoplasma	s__Malacoplasma microti
ASV000166	LV02	0.24	21.8.2020	2020	Breeding	Latvia	Pape	56.1625	21.0656	Female	Young	k__Bacteria	p__Proteobacteria	c__Gammaproteobacteria	o__Enterobacterales	f__Enterobacteriaceae	g__Escherichia-Shigella	s__Escherichia coli
ASV000099	9_vantaa	0.238	14.9.2020	2020	Breeding	Finland	Lansinnatus	60.249	25.118	Female	Young	k__Bacteria	p__Proteobacteria	c__Gammaproteobacteria	o__Enterobacterales	f__Enterobacteriaceae	g__Escherichia-Shigella	s__Escherichia albertii
ASV000179	LV45	0.234	30.9.2020	2020	Autumn	Latvia	Pape	56.1625	21.0656	Male	Young	k__Bacteria	p__Campylobacterota	c__Campylobacteria	o__Campylobacterales	f__Campylobacteraceae	g__Campylobacter	s__Campylobacter jejuni subsp. jejuni LMG 23269
ASV000003	8_chize	0.233	18.5.2021	2021	Breeding	France	Chize forest	46.1504	0.4242	Male	Unknown	k__Bacteria	p__Campylobacterota	c__Campylobacteria	o__Campylobacterales	f__Campylobacteraceae	g__Campylobacter	s__Campylobacter jejuni subsp. jejuni LMG 23211
ASV000008	A810989	0.23	24.3.2021	2021	Spring	Finland	Hanko	59.8283	22.9659	Male	Adult	k__Bacteria	p__Campylobacterota	c__Campylobacteria	o__Campylobacterales	f__Campylobacteraceae	g__Campylobacter	s__Campylobacter sp. RM16704
ASV000052	2_vantaa	0.226	2.9.2020	2020	Breeding	Finland	Lansinnatus	60.249	25.118	Male	Young	k__Bacteria	p__Proteobacteria	c__Gammaproteobacteria	o__Enterobacterales	f__Enterobacteriaceae	g__Escherichia-Shigella	s__Escherichia coli
ASV000035	D15	0.224	18.5.2021	2021	Breeding	France	Chize forest	46.1319	0.4387	Male	Unknown	k__Bacteria	p__Firmicutes	c__Bacilli	o__Mycoplasmatales	f__Mycoplasmataceae	g__Mycoplasma	s__Malacoplasma microti
ASV000134	A810920	0.216	12.8.2020	2020	Breeding	Finland	Hanko	59.8283	22.9659	Male	Young	k__Bacteria	p__Proteobacteria	c__Gammaproteobacteria	o__Enterobacterales	f__Enterobacteriaceae	g__Escherichia-Shigella	s__Escherichia coli
ASV000003	13_vantaa	0.214	1.10.2020	2020	Autumn	Finland	Lansinnatus	60.249	25.118	Male	Adult	k__Bacteria	p__Campylobacterota	c__Campylobacteria	o__Campylobacterales	f__Campylobacteraceae	g__Campylobacter	s__Campylobacter jejuni subsp. jejuni LMG 23211
ASV000007	LV18	0.201	19.9.2020	2020	Autumn	Latvia	Pape	56.1625	21.0656	Female	Adult	k__Bacteria	p__Proteobacteria	c__Gammaproteobacteria	o__Enterobacterales	f__Enterobacteriaceae	g__Escherichia-Shigella	s__Escherichia marmotae
ASV000008	VD_01	0.194	27.7.2020	2020	Breeding	Denmark	Tinning Mose	56.266	9.957	Female	Young	k__Bacteria	p__Campylobacterota	c__Campylobacteria	o__Campylobacterales	f__Campylobacteraceae	g__Campylobacter	s__Campylobacter sp. RM16704
ASV000089	A810920	0.193	12.8.2020	2020	Breeding	Finland	Hanko	59.8283	22.9659	Male	Young	k__Bacteria	p__Firmicutes	c__Bacilli	o__Mycoplasmatales	f__Mycoplasmataceae	g__Mycoplasma	s__Mycoplasma penetrans HF-2
ASV000008	10_chize	0.187	20.5.2021	2021	Breeding	France	Chize forest	46.1578	0.4308	Male	Unknown	k__Bacteria	p__Campylobacterota	c__Campylobacteria	o__Campylobacterales	f__Campylobacteraceae	g__Campylobacter	s__Campylobacter sp. RM16704
ASV000017	16_denmark	0.18	22.9.2020	2020	Autumn	Denmark	Bagenkop	54.728	Oct.52	Male	Young	k__Bacteria	p__Proteobacteria	c__Gammaproteobacteria	o__Enterobacterales	f__Enterobacteriaceae	g__Escherichia-Shigella	s__Escherichia marmotae
ASV000068	LV32	0.171	27.9.2020	2020	Autumn	Latvia	Pape	56.1625	21.0656	Female	Young	k__Bacteria	p__Firmicutes	c__Bacilli	o__Mycoplasmatales	f__Mycoplasmataceae	g__Mycoplasma	s__Mycoplasma penetrans HF-2
ASV000256	6_denmark	0.17	21.7.2020	2020	Breeding	Denmark	Svendborg	55.0557	Oct.31	Unknown	Young	k__Bacteria	p__Firmicutes	c__Bacilli	o__Staphylococcales	f__Staphylococcaceae	g__Staphylococcus	s__Staphylococcus agnetis
ASV000017	1_denmark	0.166	11.7.2020	2020	Breeding	Denmark	Svendborg	55.0557	Oct.31	Male	Adult	k__Bacteria	p__Proteobacteria	c__Gammaproteobacteria	o__Enterobacterales	f__Enterobacteriaceae	g__Escherichia-Shigella	s__Escherichia marmotae
ASV000008	A810984	0.164	23.3.2021	2021	Spring	Finland	Hanko	59.8283	22.9659	Female	Adult	k__Bacteria	p__Campylobacterota	c__Campylobacteria	o__Campylobacterales	f__Campylobacteraceae	g__Campylobacter	s__Campylobacter sp. RM16704
ASV000007	9_vantaa	0.159	14.9.2020	2020	Breeding	Finland	Lansinnatus	60.249	25.118	Female	Young	k__Bacteria	p__Proteobacteria	c__Gammaproteobacteria	o__Enterobacterales	f__Enterobacteriaceae	g__Escherichia-Shigella	s__Escherichia marmotae
ASV000207	8A85329	0.158	5.8.2020	2020	Breeding	Denmark	Tinning Mose	56.266	9.957	Male	Young	k__Bacteria	p__Firmicutes	c__Bacilli	o__Lactobacillales	f__Streptococcaceae	g__Streptococcus	s__Streptococcus equinus ATCC 700338
ASV000231	15_denmark	0.156	20.9.2020	2020	Autumn	Denmark	Hjulby	55.3422	Oct.66	Male	Young	k__Bacteria	p__Firmicutes	c__Bacilli	o__Mycoplasmatales	f__Mycoplasmataceae	g__Mycoplasma	s__Malacoplasma microti
ASV000996	LV45	0.147	30.9.2020	2020	Autumn	Latvia	Pape	56.1625	21.0656	Male	Young	k__Bacteria	p__Proteobacteria	c__Gammaproteobacteria	o__Pseudomonadales	f__Pseudomonadaceae	g__Pseudomonas	s__Pseudomonas sp. TKP
ASV000030	10_chize	0.144	20.5.2021	2021	Breeding	France	Chize forest	46.1578	0.4308	Male	Unknown	k__Bacteria	p__Firmicutes	c__Bacilli	o__Mycoplasmatales	f__Mycoplasmataceae	g__Ureaplasma	s__
ASV000007	13_vantaa	0.142	1.10.2020	2020	Autumn	Finland	Lansinnatus	60.249	25.118	Male	Adult	k__Bacteria	p__Proteobacteria	c__Gammaproteobacteria	o__Enterobacterales	f__Enterobacteriaceae	g__Escherichia-Shigella	s__Escherichia marmotae
ASV000184	A810920	0.134	12.8.2020	2020	Breeding	Finland	Hanko	59.8283	22.9659	Male	Young	k__Bacteria	p__Proteobacteria	c__Gammaproteobacteria	o__Enterobacterales	f__Enterobacteriaceae	g__Escherichia-Shigella	s__Escherichia coli 55989
ASV000467	7_vantaa	0.134	2.9.2020	2020	Breeding	Finland	Lansinnatus	60.249	25.118	Male	Young	k__Bacteria	p__Proteobacteria	c__Gammaproteobacteria	o__Pseudomonadales	f__Pseudomonadaceae	g__Pseudomonas	s__Pseudomonas migulae
ASV000179	2_vantaa	0.13	2.9.2020	2020	Breeding	Finland	Lansinnatus	60.249	25.118	Male	Young	k__Bacteria	p__Campylobacterota	c__Campylobacteria	o__Campylobacterales	f__Campylobacteraceae	g__Campylobacter	s__Campylobacter jejuni subsp. jejuni LMG 23269
ASV000007	8A85322	0.128	20.7.2020	2020	Breeding	Denmark	Tinning Mose	56.266	9.957	Female	Adult	k__Bacteria	p__Proteobacteria	c__Gammaproteobacteria	o__Enterobacterales	f__Enterobacteriaceae	g__Escherichia-Shigella	s__Escherichia marmotae
ASV000030	D15	0.128	18.5.2021	2021	Breeding	France	Chize forest	46.1319	0.4387	Male	Unknown	k__Bacteria	p__Firmicutes	c__Bacilli	o__Mycoplasmatales	f__Mycoplasmataceae	g__Ureaplasma	s__
ASV000007	LV36	0.127	28.9.2020	2020	Autumn	Latvia	Pape	56.1625	21.0656	Female	Young	k__Bacteria	p__Proteobacteria	c__Gammaproteobacteria	o__Enterobacterales	f__Enterobacteriaceae	g__Escherichia-Shigella	s__Escherichia marmotae
ASV000450	A810982	0.122	22.3.2021	2021	Spring	Finland	Hanko	59.8283	22.9659	Male	Adult	k__Bacteria	p__Firmicutes	c__Bacilli	o__Lactobacillales	f__Streptococcaceae	g__Streptococcus	s__Streptococcus equinus ATCC 700338
ASV000485	A810982	0.113	22.3.2021	2021	Spring	Finland	Hanko	59.8283	22.9659	Male	Adult	k__Bacteria	p__Campylobacterota	c__Campylobacteria	o__Campylobacterales	f__Campylobacteraceae	g__Campylobacter	s__Campylobacter jejuni
ASV000169	D27	0.109	27.5.2021	2021	Breeding	France	Chize forest	46.0951	0.4133	Female	Unknown	k__Bacteria	p__Firmicutes	c__Clostridia	o__Clostridiales	f__Clostridiaceae	g__Clostridium sensu stricto 1	s__Clostridium sp. Marseille-P2414
ASV000465	LV05	0.104	2.9.2020	2020	Breeding	Latvia	Pape	56.1625	21.0656	Male	Adult	k__Bacteria	p__Firmicutes	c__Bacilli	o__Staphylococcales	f__Staphylococcaceae	g__Staphylococcus	s__Staphylococcus epidermidis
ASV000008	D27	0.1	27.5.2021	2021	Breeding	France	Chize forest	46.0951	0.4133	Female	Unknown	k__Bacteria	p__Campylobacterota	c__Campylobacteria	o__Campylobacterales	f__Campylobacteraceae	g__Campylobacter	s__Campylobacter sp. RM16704
ASV000273	LV31	0.097	26.9.2020	2020	Autumn	Latvia	Pape	56.1625	21.0656	Male	Young	k__Bacteria	p__Proteobacteria	c__Gammaproteobacteria	o__Enterobacterales	f__Enterobacteriaceae	g__Escherichia-Shigella	s__Escherichia albertii
ASV000169	A810987	0.096	24.3.2021	2021	Spring	Finland	Hanko	59.8283	22.9659	Male	Adult	k__Bacteria	p__Firmicutes	c__Clostridia	o__Clostridiales	f__Clostridiaceae	g__Clostridium sensu stricto 1	s__Clostridium sp. Marseille-P2414
ASV000156	LV05	0.092	2.9.2020	2020	Breeding	Latvia	Pape	56.1625	21.0656	Male	Adult	k__Bacteria	p__Proteobacteria	c__Gammaproteobacteria	o__Pseudomonadales	f__Pseudomonadaceae	g__Pseudomonas	s__Pseudomonas yamanorum
ASV000424	LV02	0.091	21.8.2020	2020	Breeding	Latvia	Pape	56.1625	21.0656	Female	Young	k__Bacteria	p__Proteobacteria	c__Gammaproteobacteria	o__Enterobacterales	f__Enterobacteriaceae	g__Escherichia-Shigella	s__Escherichia coli
ASV000609	6_chize	0.091	18.5.2021	2021	Breeding	France	Chize forest	46.1504	0.4242	Female	Unknown	k__Bacteria	p__Firmicutes	c__Clostridia	o__Clostridiales	f__Clostridiaceae	g__Clostridium sensu stricto 1	s__
ASV000408	LV02	0.088	21.8.2020	2020	Breeding	Latvia	Pape	56.1625	21.0656	Female	Young	k__Bacteria	p__Proteobacteria	c__Gammaproteobacteria	o__Enterobacterales	f__Enterobacteriaceae	g__Escherichia-Shigella	s__Escherichia albertii
ASV000030	D13	0.087	18.5.2021	2021	Breeding	France	Chize forest	46.1126	0.4495	Male	Unknown	k__Bacteria	p__Firmicutes	c__Bacilli	o__Mycoplasmatales	f__Mycoplasmataceae	g__Ureaplasma	s__
ASV000951	8_denmark	0.087	21.7.2020	2020	Breeding	Denmark	Svendborg	55.0557	Oct.31	Male	Young	k__Bacteria	p__Proteobacteria	c__Gammaproteobacteria	o__Pseudomonadales	f__Pseudomonadaceae	g__Pseudomonas	s__Pseudomonas sp. S09G 359
ASV000089	3_denmark	0.085	11.7.2020	2020	Breeding	Denmark	Svendborg	55.0557	Oct.31	Female	Adult	k__Bacteria	p__Firmicutes	c__Bacilli	o__Mycoplasmatales	f__Mycoplasmataceae	g__Mycoplasma	s__Mycoplasma penetrans HF-2
ASV000490	7_vantaa	0.077	2.9.2020	2020	Breeding	Finland	Lansinnatus	60.249	25.118	Male	Young	k__Bacteria	p__Firmicutes	c__Bacilli	o__Lactobacillales	f__Enterococcaceae	g__Enterococcus	s__Enterococcus mundtii ATCC 882
ASV000502	LV05	0.077	2.9.2020	2020	Breeding	Latvia	Pape	56.1625	21.0656	Male	Adult	k__Bacteria	p__Proteobacteria	c__Gammaproteobacteria	o__Pseudomonadales	f__Pseudomonadaceae	g__Pseudomonas	s__Pseudomonas protegens
ASV000720	8A85329	0.076	5.8.2020	2020	Breeding	Denmark	Tinning Mose	56.266	9.957	Male	Young	k__Bacteria	p__Proteobacteria	c__Gammaproteobacteria	o__Enterobacterales	f__Enterobacteriaceae	g__Escherichia-Shigella	s__Escherichia coli UMN026
ASV000087	A811018	0.075	26.3.2021	2021	Spring	Finland	Hanko	59.8283	22.9659	Female	Adult	k__Bacteria	p__Proteobacteria	c__Gammaproteobacteria	o__Enterobacterales	f__Enterobacteriaceae	g__Escherichia-Shigella	s__Escherichia albertii
ASV000881	8A85329	0.073	5.8.2020	2020	Breeding	Denmark	Tinning Mose	56.266	9.957	Male	Young	k__Bacteria	p__Proteobacteria	c__Gammaproteobacteria	o__Enterobacterales	f__Enterobacteriaceae	g__Escherichia-Shigella	s__Escherichia marmotae
ASV000973	LV05	0.072	2.9.2020	2020	Breeding	Latvia	Pape	56.1625	21.0656	Male	Adult	k__Bacteria	p__Actinobacteriota	c__Actinobacteria	o__Corynebacteriales	f__Corynebacteriaceae	g__Corynebacterium	s__
ASV000144	A810920	0.071	12.8.2020	2020	Breeding	Finland	Hanko	59.8283	22.9659	Male	Young	k__Bacteria	p__Proteobacteria	c__Gammaproteobacteria	o__Enterobacterales	f__Enterobacteriaceae	g__Escherichia-Shigella	s__Escherichia coli
ASV000008	D28	0.07	31.5.2021	2021	Breeding	France	Chize forest	46.1201	0.4585	Male	Unknown	k__Bacteria	p__Campylobacterota	c__Campylobacteria	o__Campylobacterales	f__Campylobacteraceae	g__Campylobacter	s__Campylobacter sp. RM16704
ASV000200	6_vantaa	0.07	2.9.2020	2020	Breeding	Finland	Lansinnatus	60.249	25.118	Male	Young	k__Bacteria	p__Proteobacteria	c__Gammaproteobacteria	o__Enterobacterales	f__Yersiniaceae	g__Serratia	s__Rahnella sp. 'CDC 21234'
ASV000008	A686078	0.069	4.6.2020	2020	Breeding	Finland	Karjaa	60.0715	23.662	Male	Adult	k__Bacteria	p__Campylobacterota	c__Campylobacteria	o__Campylobacterales	f__Campylobacteraceae	g__Campylobacter	s__Campylobacter sp. RM16704
ASV000810	12_denmark	0.069	16.8.2020	2020	Breeding	Denmark	Bagenkop	54.728	Oct.52	Unknown	Young	k__Bacteria	p__Proteobacteria	c__Gammaproteobacteria	o__Pseudomonadales	f__Pseudomonadaceae	g__Pseudomonas	s__Pseudomonas lurida
ASV000596	6_vantaa	0.068	2.9.2020	2020	Breeding	Finland	Lansinnatus	60.249	25.118	Male	Young	k__Bacteria	p__Proteobacteria	c__Gammaproteobacteria	o__Enterobacterales	f__Morganellaceae	g__Proteus	s__Proteus hauseri
ASV000423	A686067	0.066	31.5.2020	2020	Breeding	Finland	Karjaa	60.0715	23.662	Male	Adult	k__Bacteria	p__Firmicutes	c__Clostridia	o__Clostridiales	f__Clostridiaceae	g__Clostridium sensu stricto 1	s__Clostridium perfringens NCTC 8239
ASV000873	LV05	0.066	2.9.2020	2020	Breeding	Latvia	Pape	56.1625	21.0656	Male	Adult	k__Bacteria	p__Actinobacteriota	c__Actinobacteria	o__Corynebacteriales	f__Corynebacteriaceae	g__Corynebacterium	s__
ASV000732	12_denmark	0.064	16.8.2020	2020	Breeding	Denmark	Bagenkop	54.728	Oct.52	Unknown	Young	k__Bacteria	p__Firmicutes	c__Clostridia	o__Clostridiales	f__Clostridiaceae	g__Clostridium sensu stricto 1	s__Clostridium sp. Marseille-P2414
ASV000544	A810986	0.06	24.3.2021	2021	Spring	Finland	Hanko	59.8283	22.9659	Female	Adult	k__Bacteria	p__Firmicutes	c__Bacilli	o__Mycoplasmatales	f__Mycoplasmataceae	g__Mycoplasma	s__Mycoplasma moatsii ATCC 27625
ASV000690	A809586	0.06	11.8.2020	2020	Breeding	Finland	Hanko	59.8283	22.9659	Female	Young	k__Bacteria	p__Campylobacterota	c__Campylobacteria	o__Campylobacterales	f__Campylobacteraceae	g__Campylobacter	s__Campylobacter jejuni subsp. jejuni LMG 23269
ASV000169	D26	0.059	20.5.2021	2021	Breeding	France	Chize forest	46.0979	0.4134	Female	Unknown	k__Bacteria	p__Firmicutes	c__Clostridia	o__Clostridiales	f__Clostridiaceae	g__Clostridium sensu stricto 1	s__Clostridium sp. Marseille-P2414
ASV000895	A810987	0.059	24.3.2021	2021	Spring	Finland	Hanko	59.8283	22.9659	Male	Adult	k__Bacteria	p__Proteobacteria	c__Gammaproteobacteria	o__Enterobacterales	f__Enterobacteriaceae	g__Escherichia-Shigella	s__Escherichia coli
ASV000733	13_denmark	0.057	14.9.2020	2020	Breeding	Denmark	Bagenkop	54.728	Oct.52	Male	Young	k__Bacteria	p__Proteobacteria	c__Gammaproteobacteria	o__Pseudomonadales	f__Pseudomonadaceae	g__Pseudomonas	s__Pseudomonas sp. S09G 359
ASV000928	6_denmark	0.057	21.7.2020	2020	Breeding	Denmark	Svendborg	55.0557	Oct.31	Unknown	Young	k__Bacteria	p__Firmicutes	c__Bacilli	o__Staphylococcales	f__Staphylococcaceae	g__Staphylococcus	s__Staphylococcus agnetis
ASV000035	14_chize	0.056	31.5.2021	2021	Breeding	France	Chize forest	46.1523	0.437	Female	Unknown	k__Bacteria	p__Firmicutes	c__Bacilli	o__Mycoplasmatales	f__Mycoplasmataceae	g__Mycoplasma	s__Malacoplasma microti
ASV000256	7_denmark	0.056	21.7.2020	2020	Breeding	Denmark	Svendborg	55.0557	Oct.31	Female	Adult	k__Bacteria	p__Firmicutes	c__Bacilli	o__Staphylococcales	f__Staphylococcaceae	g__Staphylococcus	s__Staphylococcus agnetis
ASV000007	A810994	0.055	26.3.2021	2021	Spring	Finland	Hanko	59.8283	22.9659	Female	Adult	k__Bacteria	p__Proteobacteria	c__Gammaproteobacteria	o__Enterobacterales	f__Enterobacteriaceae	g__Escherichia-Shigella	s__Escherichia marmotae
ASV000030	1_denmark	0.055	11.7.2020	2020	Breeding	Denmark	Svendborg	55.0557	Oct.31	Male	Adult	k__Bacteria	p__Firmicutes	c__Bacilli	o__Mycoplasmatales	f__Mycoplasmataceae	g__Ureaplasma	s__
ASV000179	A810912	0.055	9.8.2020	2020	Breeding	Finland	Hanko	59.8283	22.9659	Female	Young	k__Bacteria	p__Campylobacterota	c__Campylobacteria	o__Campylobacterales	f__Campylobacteraceae	g__Campylobacter	s__Campylobacter jejuni subsp. jejuni LMG 23269
ASV001112	LV07	0.055	15.9.2020	2020	Breeding	Latvia	Pape	56.1625	21.0656	Male	Adult	k__Bacteria	p__Proteobacteria	c__Gammaproteobacteria	o__Pseudomonadales	f__Moraxellaceae	g__Acinetobacter	s__
ASV001501	12_denmark	0.055	16.8.2020	2020	Breeding	Denmark	Bagenkop	54.728	Oct.52	Unknown	Young	k__Bacteria	p__Firmicutes	c__Bacilli	o__Staphylococcales	f__Staphylococcaceae	g__Staphylococcus	s__Staphylococcus stepanovicii
ASV000030	D26	0.054	20.5.2021	2021	Breeding	France	Chize forest	46.0979	0.4134	Female	Unknown	k__Bacteria	p__Firmicutes	c__Bacilli	o__Mycoplasmatales	f__Mycoplasmataceae	g__Ureaplasma	s__
ASV001961	8_denmark	0.054	21.7.2020	2020	Breeding	Denmark	Svendborg	55.0557	Oct.31	Male	Young	k__Bacteria	p__Proteobacteria	c__Gammaproteobacteria	o__Pseudomonadales	f__Pseudomonadaceae	g__Pseudomonas	s__Pseudomonas oryzihabitans
ASV000156	A809586	0.051	11.8.2020	2020	Breeding	Finland	Hanko	59.8283	22.9659	Female	Young	k__Bacteria	p__Proteobacteria	c__Gammaproteobacteria	o__Pseudomonadales	f__Pseudomonadaceae	g__Pseudomonas	s__Pseudomonas yamanorum
ASV000052	6_vantaa	0.05	2.9.2020	2020	Breeding	Finland	Lansinnatus	60.249	25.118	Male	Young	k__Bacteria	p__Proteobacteria	c__Gammaproteobacteria	o__Enterobacterales	f__Enterobacteriaceae	g__Escherichia-Shigella	s__Escherichia coli
ASV000169	8A85322	0.05	20.7.2020	2020	Breeding	Denmark	Tinning Mose	56.266	9.957	Female	Adult	k__Bacteria	p__Firmicutes	c__Clostridia	o__Clostridiales	f__Clostridiaceae	g__Clostridium sensu stricto 1	s__Clostridium sp. Marseille-P2414
ASV001085	A810912	0.05	9.8.2020	2020	Breeding	Finland	Hanko	59.8283	22.9659	Female	Young	k__Bacteria	p__Actinobacteriota	c__Actinobacteria	o__Corynebacteriales	f__Mycobacteriaceae	g__Mycobacterium	s__
ASV000017	3_denmark	0.049	11.7.2020	2020	Breeding	Denmark	Svendborg	55.0557	Oct.31	Female	Adult	k__Bacteria	p__Proteobacteria	c__Gammaproteobacteria	o__Enterobacterales	f__Enterobacteriaceae	g__Escherichia-Shigella	s__Escherichia marmotae
ASV000030	A810992	0.049	25.3.2021	2021	Spring	Finland	Hanko	59.8283	22.9659	Female	Adult	k__Bacteria	p__Firmicutes	c__Bacilli	o__Mycoplasmatales	f__Mycoplasmataceae	g__Ureaplasma	s__
ASV000017	VD_01	0.048	27.7.2020	2020	Breeding	Denmark	Tinning Mose	56.266	9.957	Female	Young	k__Bacteria	p__Proteobacteria	c__Gammaproteobacteria	o__Enterobacterales	f__Enterobacteriaceae	g__Escherichia-Shigella	s__Escherichia marmotae
ASV001016	6_denmark	0.048	21.7.2020	2020	Breeding	Denmark	Svendborg	55.0557	Oct.31	Unknown	Young	k__Bacteria	p__Proteobacteria	c__Gammaproteobacteria	o__Enterobacterales	f__Yersiniaceae	g__Yersinia	s__Yersinia bercovieri
ASV001172	13_denmark	0.048	14.9.2020	2020	Breeding	Denmark	Bagenkop	54.728	Oct.52	Male	Young	k__Bacteria	p__Proteobacteria	c__Gammaproteobacteria	o__Pseudomonadales	f__Pseudomonadaceae	g__Pseudomonas	s__Pseudomonas antarctica
ASV000008	A810988	0.047	24.3.2021	2021	Spring	Finland	Hanko	59.8283	22.9659	Male	Adult	k__Bacteria	p__Campylobacterota	c__Campylobacteria	o__Campylobacterales	f__Campylobacteraceae	g__Campylobacter	s__Campylobacter sp. RM16704
ASV001145	A810987	0.047	24.3.2021	2021	Spring	Finland	Hanko	59.8283	22.9659	Male	Adult	k__Bacteria	p__Firmicutes	c__Clostridia	o__Clostridiales	f__Clostridiaceae	g__Clostridium sensu stricto 1	s__Clostridium sp. Marseille-P2414
ASV000007	A810988	0.044	24.3.2021	2021	Spring	Finland	Hanko	59.8283	22.9659	Male	Adult	k__Bacteria	p__Proteobacteria	c__Gammaproteobacteria	o__Enterobacterales	f__Enterobacteriaceae	g__Escherichia-Shigella	s__Escherichia marmotae
ASV000030	LV18	0.044	19.9.2020	2020	Autumn	Latvia	Pape	56.1625	21.0656	Female	Adult	k__Bacteria	p__Firmicutes	c__Bacilli	o__Mycoplasmatales	f__Mycoplasmataceae	g__Ureaplasma	s__
ASV001164	1_denmark	0.044	11.7.2020	2020	Breeding	Denmark	Svendborg	55.0557	Oct.31	Male	Adult	k__Bacteria	p__Proteobacteria	c__Gammaproteobacteria	o__Enterobacterales	f__Enterobacteriaceae	g__Citrobacter	s__Citrobacter werkmanii
ASV000089	8A85286	0.043	19.8.2020	2020	Breeding	Denmark	Tinning Mose	56.266	9.957	Male	Young	k__Bacteria	p__Firmicutes	c__Bacilli	o__Mycoplasmatales	f__Mycoplasmataceae	g__Mycoplasma	s__Mycoplasma penetrans HF-2
ASV001832	11_denmark	0.043	1.8.2020	2020	Breeding	Denmark	Svendborg	55.0557	Oct.31	Male	Adult	k__Bacteria	p__Proteobacteria	c__Gammaproteobacteria	o__Enterobacterales	f__Enterobacteriaceae	g__Escherichia-Shigella	s__Escherichia albertii
ASV000156	8A85286	0.042	19.8.2020	2020	Breeding	Denmark	Tinning Mose	56.266	9.957	Male	Young	k__Bacteria	p__Proteobacteria	c__Gammaproteobacteria	o__Pseudomonadales	f__Pseudomonadaceae	g__Pseudomonas	s__Pseudomonas yamanorum
ASV000918	A810912	0.041	9.8.2020	2020	Breeding	Finland	Hanko	59.8283	22.9659	Female	Young	k__Bacteria	p__Proteobacteria	c__Gammaproteobacteria	o__Pseudomonadales	f__Pseudomonadaceae	g__Pseudomonas	s__Pseudomonas sp. M30-35
ASV000972	8A85286	0.041	19.8.2020	2020	Breeding	Denmark	Tinning Mose	56.266	9.957	Male	Young	k__Bacteria	p__Firmicutes	c__Bacilli	o__Lactobacillales	f__Streptococcaceae	g__Streptococcus	s__Streptococcus salivarius subsp. thermophilus
ASV001180	13_denmark	0.041	14.9.2020	2020	Breeding	Denmark	Bagenkop	54.728	Oct.52	Male	Young	k__Bacteria	p__Proteobacteria	c__Gammaproteobacteria	o__Pseudomonadales	f__Pseudomonadaceae	g__Pseudomonas	s__Pseudomonas fluorescens
ASV000012	LV32	0.039	27.9.2020	2020	Autumn	Latvia	Pape	56.1625	21.0656	Female	Young	k__Bacteria	p__Campylobacterota	c__Campylobacteria	o__Campylobacterales	f__Helicobacteraceae	g__Helicobacter	s__Helicobacter anseris
ASV000030	A686078	0.039	4.6.2020	2020	Breeding	Finland	Karjaa	60.0715	23.662	Male	Adult	k__Bacteria	p__Firmicutes	c__Bacilli	o__Mycoplasmatales	f__Mycoplasmataceae	g__Ureaplasma	s__
ASV000075	LV09	0.039	17.9.2020	2020	Autumn	Latvia	Pape	56.1625	21.0656	Male	Young	k__Bacteria	p__Proteobacteria	c__Gammaproteobacteria	o__Enterobacterales	f__Enterobacteriaceae	g__Escherichia-Shigella	s__Escherichia coli Nissle 1917
ASV000089	LV30	0.039	25.9.2020	2020	Autumn	Latvia	Pape	56.1625	21.0656	Female	Young	k__Bacteria	p__Firmicutes	c__Bacilli	o__Mycoplasmatales	f__Mycoplasmataceae	g__Mycoplasma	s__Mycoplasma penetrans HF-2
ASV000068	D27	0.038	27.5.2021	2021	Breeding	France	Chize forest	46.0951	0.4133	Female	Unknown	k__Bacteria	p__Firmicutes	c__Bacilli	o__Mycoplasmatales	f__Mycoplasmataceae	g__Mycoplasma	s__Mycoplasma penetrans HF-2
ASV000258	9_vantaa	0.037	14.9.2020	2020	Breeding	Finland	Lansinnatus	60.249	25.118	Female	Young	k__Bacteria	p__Firmicutes	c__Bacilli	o__Lactobacillales	f__Enterococcaceae	g__Enterococcus	s__Enterococcus faecalis ATCC 27275
ASV000089	VD_01	0.036	27.7.2020	2020	Breeding	Denmark	Tinning Mose	56.266	9.957	Female	Young	k__Bacteria	p__Firmicutes	c__Bacilli	o__Mycoplasmatales	f__Mycoplasmataceae	g__Mycoplasma	s__Mycoplasma penetrans HF-2
ASV000539	13_denmark	0.036	14.9.2020	2020	Breeding	Denmark	Bagenkop	54.728	Oct.52	Male	Young	k__Bacteria	p__Firmicutes	c__Bacilli	o__Mycoplasmatales	f__Mycoplasmataceae	g__Mycoplasma	s__Malacoplasma microti
ASV000807	9_vantaa	0.036	14.9.2020	2020	Breeding	Finland	Lansinnatus	60.249	25.118	Female	Young	k__Bacteria	p__Proteobacteria	c__Gammaproteobacteria	o__Enterobacterales	f__Enterobacteriaceae	g__Escherichia-Shigella	s__Escherichia coli
ASV000984	6_vantaa	0.036	2.9.2020	2020	Breeding	Finland	Lansinnatus	60.249	25.118	Male	Young	k__Bacteria	p__Proteobacteria	c__Gammaproteobacteria	o__Enterobacterales	f__Morganellaceae	g__Proteus	s__Proteus hauseri
ASV001351	8_chize	0.036	18.5.2021	2021	Breeding	France	Chize forest	46.1504	0.4242	Male	Unknown	k__Bacteria	p__Actinobacteriota	c__Actinobacteria	o__Corynebacteriales	f__Corynebacteriaceae	g__Corynebacterium	s__
ASV001402	8A85329	0.036	5.8.2020	2020	Breeding	Denmark	Tinning Mose	56.266	9.957	Male	Young	k__Bacteria	p__Proteobacteria	c__Gammaproteobacteria	o__Enterobacterales	f__Enterobacteriaceae	g__Escherichia-Shigella	s__Escherichia coli
ASV000007	LV32	0.035	27.9.2020	2020	Autumn	Latvia	Pape	56.1625	21.0656	Female	Young	k__Bacteria	p__Proteobacteria	c__Gammaproteobacteria	o__Enterobacterales	f__Enterobacteriaceae	g__Escherichia-Shigella	s__Escherichia marmotae
ASV000089	A810991	0.035	25.3.2021	2021	Spring	Finland	Hanko	59.8283	22.9659	Male	Adult	k__Bacteria	p__Firmicutes	c__Bacilli	o__Mycoplasmatales	f__Mycoplasmataceae	g__Mycoplasma	s__Mycoplasma penetrans HF-2
ASV001245	8A85286	0.035	19.8.2020	2020	Breeding	Denmark	Tinning Mose	56.266	9.957	Male	Young	k__Bacteria	p__Proteobacteria	c__Gammaproteobacteria	o__Pseudomonadales	f__Moraxellaceae	g__Acinetobacter	s__Acinetobacter johnsonii XBB1
ASV000169	D15	0.034	18.5.2021	2021	Breeding	France	Chize forest	46.1319	0.4387	Male	Unknown	k__Bacteria	p__Firmicutes	c__Clostridia	o__Clostridiales	f__Clostridiaceae	g__Clostridium sensu stricto 1	s__Clostridium sp. Marseille-P2414
ASV000568	A809582	0.034	9.8.2020	2020	Breeding	Finland	Hanko	59.8283	22.9659	Male	Young	k__Bacteria	p__Campylobacterota	c__Campylobacteria	o__Campylobacterales	f__Helicobacteraceae	g__Helicobacter	s__Helicobacter anseris
ASV000648	16_denmark	0.034	22.9.2020	2020	Autumn	Denmark	Bagenkop	54.728	Oct.52	Male	Young	k__Bacteria	p__Proteobacteria	c__Gammaproteobacteria	o__Enterobacterales	f__Enterobacteriaceae	g__Escherichia-Shigella	s__Escherichia coli
ASV000773	D15	0.034	18.5.2021	2021	Breeding	France	Chize forest	46.1319	0.4387	Male	Unknown	k__Bacteria	p__Proteobacteria	c__Gammaproteobacteria	o__Enterobacterales	f__Enterobacteriaceae	g__Escherichia-Shigella	s__Escherichia coli
ASV000857	A810920	0.034	12.8.2020	2020	Breeding	Finland	Hanko	59.8283	22.9659	Male	Young	k__Bacteria	p__Proteobacteria	c__Gammaproteobacteria	o__Enterobacterales	f__Enterobacteriaceae	g__Escherichia-Shigella	s__Escherichia coli
ASV001478	8A85329	0.034	5.8.2020	2020	Breeding	Denmark	Tinning Mose	56.266	9.957	Male	Young	k__Bacteria	p__Firmicutes	c__Clostridia	o__Clostridiales	f__Clostridiaceae	g__Clostridium sensu stricto 1	s__Clostridium perfringens
ASV000778	9_vantaa	0.033	14.9.2020	2020	Breeding	Finland	Lansinnatus	60.249	25.118	Female	Young	k__Bacteria	p__Proteobacteria	c__Gammaproteobacteria	o__Enterobacterales	f__Enterobacteriaceae	g__Escherichia-Shigella	s__Escherichia coli
ASV001026	8_vantaa	0.033	2.9.2020	2020	Breeding	Finland	Lansinnatus	60.249	25.118	Male	Young	k__Bacteria	p__Proteobacteria	c__Gammaproteobacteria	o__Enterobacterales	f__Enterobacteriaceae	g__Escherichia-Shigella	s__Escherichia coli
ASV000068	A686080	0.032	23.9.2020	2020	Autumn	Finland	Karjaa	60.0715	23.662	Male	Young	k__Bacteria	p__Firmicutes	c__Bacilli	o__Mycoplasmatales	f__Mycoplasmataceae	g__Mycoplasma	s__Mycoplasma penetrans HF-2
ASV001174	6_chize	0.032	18.5.2021	2021	Breeding	France	Chize forest	46.1504	0.4242	Female	Unknown	k__Bacteria	p__Firmicutes	c__Bacilli	o__Staphylococcales	f__Staphylococcaceae	g__Staphylococcus	s__Staphylococcus epidermidis RP62A phage SP-beta
ASV001571	8A85329	0.032	5.8.2020	2020	Breeding	Denmark	Tinning Mose	56.266	9.957	Male	Young	k__Bacteria	p__Firmicutes	c__Clostridia	o__Clostridiales	f__Clostridiaceae	g__Clostridium sensu stricto 1	s__Clostridium perfringens NCTC 8239
ASV001977	VD_01	0.032	27.7.2020	2020	Breeding	Denmark	Tinning Mose	56.266	9.957	Female	Young	k__Bacteria	p__Firmicutes	c__Bacilli	o__Lactobacillales	f__Streptococcaceae	g__Streptococcus	s__Streptococcus equinus ATCC 700338
ASV000156	13_denmark	0.031	14.9.2020	2020	Breeding	Denmark	Bagenkop	54.728	Oct.52	Male	Young	k__Bacteria	p__Proteobacteria	c__Gammaproteobacteria	o__Pseudomonadales	f__Pseudomonadaceae	g__Pseudomonas	s__Pseudomonas yamanorum
ASV001575	13_denmark	0.031	14.9.2020	2020	Breeding	Denmark	Bagenkop	54.728	Oct.52	Male	Young	k__Bacteria	p__Actinobacteriota	c__Actinobacteria	o__Corynebacteriales	f__Mycobacteriaceae	g__Mycobacterium	s__
ASV000035	9_denmark	0.03	21.7.2020	2020	Breeding	Denmark	Svendborg	55.0557	Oct.31	Female	Adult	k__Bacteria	p__Firmicutes	c__Bacilli	o__Mycoplasmatales	f__Mycoplasmataceae	g__Mycoplasma	s__Malacoplasma microti
ASV000484	A810920	0.03	12.8.2020	2020	Breeding	Finland	Hanko	59.8283	22.9659	Male	Young	k__Bacteria	p__Proteobacteria	c__Gammaproteobacteria	o__Enterobacterales	f__Enterobacteriaceae	g__Escherichia-Shigella	s__Escherichia coli IAI39
ASV000539	8A85331	0.03	28.8.2020	2020	Breeding	Denmark	Tinning Mose	56.266	9.957	Male	Adult	k__Bacteria	p__Firmicutes	c__Bacilli	o__Mycoplasmatales	f__Mycoplasmataceae	g__Mycoplasma	s__Malacoplasma microti
ASV000573	A686068	0.03	5.10.2020	2020	Autumn	Finland	Karjaa	60.0715	23.662	Male	Young	k__Bacteria	p__Firmicutes	c__Bacilli	o__Mycoplasmatales	f__Mycoplasmataceae	g__Mycoplasma	s__Mycoplasma moatsii ATCC 27625
ASV001307	6_vantaa	0.03	2.9.2020	2020	Breeding	Finland	Lansinnatus	60.249	25.118	Male	Young	k__Bacteria	p__Proteobacteria	c__Gammaproteobacteria	o__Enterobacterales	f__Morganellaceae	g__Proteus	s__Proteus hauseri
ASV000156	A809582	0.029	9.8.2020	2020	Breeding	Finland	Hanko	59.8283	22.9659	Male	Young	k__Bacteria	p__Proteobacteria	c__Gammaproteobacteria	o__Pseudomonadales	f__Pseudomonadaceae	g__Pseudomonas	s__Pseudomonas yamanorum
ASV000805	16_denmark	0.029	22.9.2020	2020	Autumn	Denmark	Bagenkop	54.728	Oct.52	Male	Young	k__Bacteria	p__Proteobacteria	c__Gammaproteobacteria	o__Enterobacterales	f__Enterobacteriaceae	g__Escherichia-Shigella	s__Escherichia coli
ASV000934	16_denmark	0.029	22.9.2020	2020	Autumn	Denmark	Bagenkop	54.728	Oct.52	Male	Young	k__Bacteria	p__Proteobacteria	c__Gammaproteobacteria	o__Enterobacterales	f__Enterobacteriaceae	g__Escherichia-Shigella	s__Escherichia marmotae
ASV000936	8A85286	0.029	19.8.2020	2020	Breeding	Denmark	Tinning Mose	56.266	9.957	Male	Young	k__Bacteria	p__Proteobacteria	c__Gammaproteobacteria	o__Pseudomonadales	f__Pseudomonadaceae	g__Pseudomonas	s__Pseudomonas lundensis
ASV001178	6_denmark	0.029	21.7.2020	2020	Breeding	Denmark	Svendborg	55.0557	Oct.31	Unknown	Young	k__Bacteria	p__Firmicutes	c__Bacilli	o__Staphylococcales	f__Staphylococcaceae	g__Staphylococcus	s__Staphylococcus agnetis
ASV001220	13_denmark	0.029	14.9.2020	2020	Breeding	Denmark	Bagenkop	54.728	Oct.52	Male	Young	k__Bacteria	p__Proteobacteria	c__Gammaproteobacteria	o__Pseudomonadales	f__Moraxellaceae	g__Acinetobacter	s__Acinetobacter sp. K7SC-8A
ASV000008	D26	0.028	20.5.2021	2021	Breeding	France	Chize forest	46.0979	0.4134	Female	Unknown	k__Bacteria	p__Campylobacterota	c__Campylobacteria	o__Campylobacterales	f__Campylobacteraceae	g__Campylobacter	s__Campylobacter sp. RM16704
ASV000035	9_chize	0.028	20.5.2021	2021	Breeding	France	Chize forest	46.1523	0.437	Male	Unknown	k__Bacteria	p__Firmicutes	c__Bacilli	o__Mycoplasmatales	f__Mycoplasmataceae	g__Mycoplasma	s__Malacoplasma microti
ASV000099	LV32	0.028	27.9.2020	2020	Autumn	Latvia	Pape	56.1625	21.0656	Female	Young	k__Bacteria	p__Proteobacteria	c__Gammaproteobacteria	o__Enterobacterales	f__Enterobacteriaceae	g__Escherichia-Shigella	s__Escherichia albertii
ASV000207	14_denmark	0.028	20.9.2020	2020	Autumn	Denmark	Hjulby	55.3422	Oct.66	Male	Young	k__Bacteria	p__Firmicutes	c__Bacilli	o__Lactobacillales	f__Streptococcaceae	g__Streptococcus	s__Streptococcus equinus ATCC 700338
ASV000798	A810988	0.028	24.3.2021	2021	Spring	Finland	Hanko	59.8283	22.9659	Male	Adult	k__Bacteria	p__Firmicutes	c__Bacilli	o__Mycoplasmatales	f__Mycoplasmataceae	g__Mycoplasma	s__Mycoplasma moatsii ATCC 27625
ASV001014	7_denmark	0.028	21.7.2020	2020	Breeding	Denmark	Svendborg	55.0557	Oct.31	Female	Adult	k__Bacteria	p__Firmicutes	c__Bacilli	o__Mycoplasmatales	f__Mycoplasmataceae	g__Mycoplasma	s__Mycoplasma penetrans HF-2
ASV000683	8A85286	0.027	19.8.2020	2020	Breeding	Denmark	Tinning Mose	56.266	9.957	Male	Young	k__Bacteria	p__Proteobacteria	c__Gammaproteobacteria	o__Pseudomonadales	f__Moraxellaceae	g__Acinetobacter	s__
ASV000710	16_denmark	0.027	22.9.2020	2020	Autumn	Denmark	Bagenkop	54.728	Oct.52	Male	Young	k__Bacteria	p__Proteobacteria	c__Gammaproteobacteria	o__Enterobacterales	f__Enterobacteriaceae	g__Escherichia-Shigella	s__Escherichia albertii
ASV001320	8_vantaa	0.027	2.9.2020	2020	Breeding	Finland	Lansinnatus	60.249	25.118	Male	Young	k__Bacteria	p__Proteobacteria	c__Gammaproteobacteria	o__Enterobacterales	f__Enterobacteriaceae	g__Enterobacter	s__
ASV001438	LV09	0.027	17.9.2020	2020	Autumn	Latvia	Pape	56.1625	21.0656	Male	Young	k__Bacteria	p__Firmicutes	c__Bacilli	o__Lactobacillales	f__Enterococcaceae	g__Enterococcus	s__Enterococcus cecorum
ASV001967	8A85329	0.027	5.8.2020	2020	Breeding	Denmark	Tinning Mose	56.266	9.957	Male	Young	k__Bacteria	p__Firmicutes	c__Clostridia	o__Clostridiales	f__Clostridiaceae	g__Clostridium sensu stricto 1	s__Clostridium perfringens
ASV002949	8_denmark	0.027	21.7.2020	2020	Breeding	Denmark	Svendborg	55.0557	Oct.31	Male	Young	k__Bacteria	p__Proteobacteria	c__Gammaproteobacteria	o__Pseudomonadales	f__Pseudomonadaceae	g__Pseudomonas	s__Pseudomonas antarctica
ASV000029	14_vantaa	0.026	1.10.2020	2020	Autumn	Finland	Lansinnatus	60.249	25.118	Male	Adult	k__Bacteria	p__Campylobacterota	c__Campylobacteria	o__Campylobacterales	f__Helicobacteraceae	g__Helicobacter	s__Helicobacter sp. 'B52D Seymour'
ASV000030	VD_01	0.026	27.7.2020	2020	Breeding	Denmark	Tinning Mose	56.266	9.957	Female	Young	k__Bacteria	p__Firmicutes	c__Bacilli	o__Mycoplasmatales	f__Mycoplasmataceae	g__Ureaplasma	s__
ASV001225	A810987	0.026	24.3.2021	2021	Spring	Finland	Hanko	59.8283	22.9659	Male	Adult	k__Bacteria	p__Firmicutes	c__Clostridia	o__Clostridiales	f__Clostridiaceae	g__Clostridium sensu stricto 1	s__Clostridium sp. Marseille-P2414
ASV001440	A809586	0.026	11.8.2020	2020	Breeding	Finland	Hanko	59.8283	22.9659	Female	Young	k__Bacteria	p__Actinobacteriota	c__Actinobacteria	o__Corynebacteriales	f__Corynebacteriaceae	g__Corynebacterium	s__
ASV000008	A811018	0.025	26.3.2021	2021	Spring	Finland	Hanko	59.8283	22.9659	Female	Adult	k__Bacteria	p__Campylobacterota	c__Campylobacteria	o__Campylobacterales	f__Campylobacteraceae	g__Campylobacter	s__Campylobacter sp. RM16704
ASV000363	A686083	0.025	25.9.2020	2020	Autumn	Finland	Karjaa	60.0715	23.662	Male	Young	k__Bacteria	p__Proteobacteria	c__Gammaproteobacteria	o__Enterobacterales	f__Yersiniaceae	g__Serratia	s__Serratia sp. 3ACOL1
ASV000738	8A85331	0.025	28.8.2020	2020	Breeding	Denmark	Tinning Mose	56.266	9.957	Male	Adult	k__Bacteria	p__Proteobacteria	c__Gammaproteobacteria	o__Pseudomonadales	f__Pseudomonadaceae	g__Pseudomonas	s__Pseudomonas trivialis
ASV001497	6_chize	0.025	18.5.2021	2021	Breeding	France	Chize forest	46.1504	0.4242	Female	Unknown	k__Bacteria	p__Firmicutes	c__Bacilli	o__Staphylococcales	f__Staphylococcaceae	g__Staphylococcus	s__Staphylococcus epidermidis
ASV001976	8A85329	0.025	5.8.2020	2020	Breeding	Denmark	Tinning Mose	56.266	9.957	Male	Young	k__Bacteria	p__Firmicutes	c__Clostridia	o__Clostridiales	f__Clostridiaceae	g__Clostridium sensu stricto 1	s__Clostridium perfringens
ASV000089	6_denmark	0.024	21.7.2020	2020	Breeding	Denmark	Svendborg	55.0557	Oct.31	Unknown	Young	k__Bacteria	p__Firmicutes	c__Bacilli	o__Mycoplasmatales	f__Mycoplasmataceae	g__Mycoplasma	s__Mycoplasma penetrans HF-2
ASV000179	8_vantaa	0.024	2.9.2020	2020	Breeding	Finland	Lansinnatus	60.249	25.118	Male	Young	k__Bacteria	p__Campylobacterota	c__Campylobacteria	o__Campylobacterales	f__Campylobacteraceae	g__Campylobacter	s__Campylobacter jejuni subsp. jejuni LMG 23269
ASV000732	A810984	0.024	23.3.2021	2021	Spring	Finland	Hanko	59.8283	22.9659	Female	Adult	k__Bacteria	p__Firmicutes	c__Clostridia	o__Clostridiales	f__Clostridiaceae	g__Clostridium sensu stricto 1	s__Clostridium sp. Marseille-P2414
ASV001722	8A85286	0.024	19.8.2020	2020	Breeding	Denmark	Tinning Mose	56.266	9.957	Male	Young	k__Bacteria	p__Firmicutes	c__Bacilli	o__Bacillales	f__Bacillaceae	g__Bacillus	s__Bacillus longiquaesitum
ASV000156	A810984	0.023	23.3.2021	2021	Spring	Finland	Hanko	59.8283	22.9659	Female	Adult	k__Bacteria	p__Proteobacteria	c__Gammaproteobacteria	o__Pseudomonadales	f__Pseudomonadaceae	g__Pseudomonas	s__Pseudomonas yamanorum
ASV001937	14_denmark	0.023	20.9.2020	2020	Autumn	Denmark	Hjulby	55.3422	Oct.66	Male	Young	k__Bacteria	p__Firmicutes	c__Clostridia	o__Clostridiales	f__Clostridiaceae	g__Clostridium sensu stricto 1	s__
ASV002412	LV18	0.023	19.9.2020	2020	Autumn	Latvia	Pape	56.1625	21.0656	Female	Adult	k__Bacteria	p__Proteobacteria	c__Gammaproteobacteria	o__Enterobacterales	f__Enterobacteriaceae	g__Escherichia-Shigella	s__Escherichia marmotae
ASV004593	LV45	0.023	30.9.2020	2020	Autumn	Latvia	Pape	56.1625	21.0656	Male	Young	k__Bacteria	p__Campylobacterota	c__Campylobacteria	o__Campylobacterales	f__Campylobacteraceae	g__Campylobacter	s__Campylobacter jejuni subsp. jejuni LMG 23269
ASV000029	A686080	0.022	23.9.2020	2020	Autumn	Finland	Karjaa	60.0715	23.662	Male	Young	k__Bacteria	p__Campylobacterota	c__Campylobacteria	o__Campylobacterales	f__Helicobacteraceae	g__Helicobacter	s__Helicobacter sp. 'B52D Seymour'
ASV000836	A809582	0.022	9.8.2020	2020	Breeding	Finland	Hanko	59.8283	22.9659	Male	Young	k__Bacteria	p__Firmicutes	c__Bacilli	o__Mycoplasmatales	f__Mycoplasmataceae	g__Ureaplasma	s__
ASV000990	8A85329	0.022	5.8.2020	2020	Breeding	Denmark	Tinning Mose	56.266	9.957	Male	Young	k__Bacteria	p__Firmicutes	c__Clostridia	o__Clostridiales	f__Clostridiaceae	g__Clostridium sensu stricto 1	s__Clostridium perfringens
ASV001871	8A85329	0.022	5.8.2020	2020	Breeding	Denmark	Tinning Mose	56.266	9.957	Male	Young	k__Bacteria	p__Firmicutes	c__Clostridia	o__Clostridiales	f__Clostridiaceae	g__Clostridium sensu stricto 1	s__Clostridium perfringens
ASV002042	2_vantaa	0.022	2.9.2020	2020	Breeding	Finland	Lansinnatus	60.249	25.118	Male	Young	k__Bacteria	p__Bacteroidota	c__Bacteroidia	o__Bacteroidales	f__Bacteroidaceae	g__Bacteroides	s__Blattella germanica (German cockroach)
ASV002966	12_denmark	0.022	16.8.2020	2020	Breeding	Denmark	Bagenkop	54.728	Oct.52	Unknown	Young	k__Bacteria	p__Proteobacteria	c__Gammaproteobacteria	o__Enterobacterales	f__Aeromonadaceae	g__Aeromonas	s__Aeromonas molluscorum
ASV001200	7_denmark	0.021	21.7.2020	2020	Breeding	Denmark	Svendborg	55.0557	Oct.31	Female	Adult	k__Bacteria	p__Firmicutes	c__Bacilli	o__Staphylococcales	f__Staphylococcaceae	g__Staphylococcus	s__Staphylococcus agnetis
ASV001805	LV09	0.021	17.9.2020	2020	Autumn	Latvia	Pape	56.1625	21.0656	Male	Young	k__Bacteria	p__Firmicutes	c__Bacilli	o__Lactobacillales	f__Enterococcaceae	g__Enterococcus	s__Enterococcus cecorum
ASV000030	12_denmark	0.02	16.8.2020	2020	Breeding	Denmark	Bagenkop	54.728	Oct.52	Unknown	Young	k__Bacteria	p__Firmicutes	c__Bacilli	o__Mycoplasmatales	f__Mycoplasmataceae	g__Ureaplasma	s__
ASV000423	A811018	0.02	26.3.2021	2021	Spring	Finland	Hanko	59.8283	22.9659	Female	Adult	k__Bacteria	p__Firmicutes	c__Clostridia	o__Clostridiales	f__Clostridiaceae	g__Clostridium sensu stricto 1	s__Clostridium perfringens NCTC 8239
ASV001216	6_vantaa	0.02	2.9.2020	2020	Breeding	Finland	Lansinnatus	60.249	25.118	Male	Young	k__Bacteria	p__Firmicutes	c__Bacilli	o__Mycoplasmatales	f__Mycoplasmataceae	g__Ureaplasma	s__
ASV001216	11_denmark	0.02	1.8.2020	2020	Breeding	Denmark	Svendborg	55.0557	Oct.31	Male	Adult	k__Bacteria	p__Firmicutes	c__Bacilli	o__Mycoplasmatales	f__Mycoplasmataceae	g__Ureaplasma	s__
ASV001284	A809586	0.02	11.8.2020	2020	Breeding	Finland	Hanko	59.8283	22.9659	Female	Young	k__Bacteria	p__Actinobacteriota	c__Actinobacteria	o__Actinomycetales	f__Actinomycetaceae	g__Actinomyces	s__
ASV001516	6_chize	0.02	18.5.2021	2021	Breeding	France	Chize forest	46.1504	0.4242	Female	Unknown	k__Bacteria	p__Firmicutes	c__Clostridia	o__Clostridiales	f__Clostridiaceae	g__Clostridium sensu stricto 1	s__
ASV002067	D27	0.02	27.5.2021	2021	Breeding	France	Chize forest	46.0951	0.4133	Female	Unknown	k__Bacteria	p__Firmicutes	c__Clostridia	o__Clostridiales	f__Clostridiaceae	g__Clostridium sensu stricto 1	s__Clostridium sp. Marseille-P2414
ASV003578	9_denmark	0.02	21.7.2020	2020	Breeding	Denmark	Svendborg	55.0557	Oct.31	Female	Adult	k__Bacteria	p__Firmicutes	c__Clostridia	o__Clostridiales	f__Clostridiaceae	g__Clostridium sensu stricto 1	s__
ASV000017	14_chize	0.019	31.5.2021	2021	Breeding	France	Chize forest	46.1523	0.437	Female	Unknown	k__Bacteria	p__Proteobacteria	c__Gammaproteobacteria	o__Enterobacterales	f__Enterobacteriaceae	g__Escherichia-Shigella	s__Escherichia marmotae
ASV000544	2_denmark	0.019	11.7.2020	2020	Breeding	Denmark	Svendborg	55.0557	Oct.31	Male	Adult	k__Bacteria	p__Firmicutes	c__Bacilli	o__Mycoplasmatales	f__Mycoplasmataceae	g__Mycoplasma	s__Mycoplasma moatsii ATCC 27625
ASV000998	7_denmark	0.019	21.7.2020	2020	Breeding	Denmark	Svendborg	55.0557	Oct.31	Female	Adult	k__Bacteria	p__Firmicutes	c__Bacilli	o__Staphylococcales	f__Staphylococcaceae	g__Staphylococcus	s__Staphylococcus agnetis
ASV001013	A810988	0.019	24.3.2021	2021	Spring	Finland	Hanko	59.8283	22.9659	Male	Adult	k__Bacteria	p__Firmicutes	c__Bacilli	o__Mycoplasmatales	f__Mycoplasmataceae	g__Ureaplasma	s__
ASV001258	12_vantaa	0.019	29.9.2020	2020	Autumn	Finland	Lansinnatus	60.249	25.118	Male	Adult	k__Bacteria	p__Proteobacteria	c__Gammaproteobacteria	o__Enterobacterales	f__Yersiniaceae	g__Serratia	s__Serratia fonticola
ASV001374	8_vantaa	0.019	2.9.2020	2020	Breeding	Finland	Lansinnatus	60.249	25.118	Male	Young	k__Bacteria	p__Proteobacteria	c__Gammaproteobacteria	o__Enterobacterales	f__Enterobacteriaceae	g__Enterobacter	s__
ASV001534	LV29	0.019	23.9.2020	2020	Autumn	Latvia	Pape	56.1625	21.0656	Female	Young	k__Bacteria	p__Proteobacteria	c__Gammaproteobacteria	o__Enterobacterales	f__Enterobacteriaceae	g__Escherichia-Shigella	s__Escherichia marmotae
ASV001934	A810982	0.019	22.3.2021	2021	Spring	Finland	Hanko	59.8283	22.9659	Male	Adult	k__Bacteria	p__Proteobacteria	c__Gammaproteobacteria	o__Enterobacterales	f__Enterobacteriaceae	g__Escherichia-Shigella	s__Escherichia marmotae
ASV001137	A686083	0.018	25.9.2020	2020	Autumn	Finland	Karjaa	60.0715	23.662	Male	Young	k__Bacteria	p__Proteobacteria	c__Gammaproteobacteria	o__Enterobacterales	f__Yersiniaceae	g__Serratia	s__Rahnella sp. 'CDC 21234'
ASV001346	D15	0.018	18.5.2021	2021	Breeding	France	Chize forest	46.1319	0.4387	Male	Unknown	k__Bacteria	p__Firmicutes	c__Clostridia	o__Clostridiales	f__Clostridiaceae	g__Clostridium sensu stricto 1	s__Clostridium sp. Marseille-P2414
ASV001368	12_vantaa	0.018	29.9.2020	2020	Autumn	Finland	Lansinnatus	60.249	25.118	Male	Adult	k__Bacteria	p__Proteobacteria	c__Gammaproteobacteria	o__Pseudomonadales	f__Pseudomonadaceae	g__Pseudomonas	s__Pseudomonas fragi
ASV001386	A810987	0.018	24.3.2021	2021	Spring	Finland	Hanko	59.8283	22.9659	Male	Adult	k__Bacteria	p__Firmicutes	c__Clostridia	o__Clostridiales	f__Clostridiaceae	g__Clostridium sensu stricto 1	s__Clostridium sp. Marseille-P2414
ASV001835	6_chize	0.018	18.5.2021	2021	Breeding	France	Chize forest	46.1504	0.4242	Female	Unknown	k__Bacteria	p__Firmicutes	c__Bacilli	o__Bacillales	f__Bacillaceae	g__Bacillus	s__Bacillus butanolivorans
ASV001910	8A85286	0.018	19.8.2020	2020	Breeding	Denmark	Tinning Mose	56.266	9.957	Male	Young	k__Bacteria	p__Proteobacteria	c__Gammaproteobacteria	o__Pseudomonadales	f__Pseudomonadaceae	g__Pseudomonas	s__Pseudomonas sp. LG1D9
ASV001949	8_chize	0.018	18.5.2021	2021	Breeding	France	Chize forest	46.1504	0.4242	Male	Unknown	k__Bacteria	p__Actinobacteriota	c__Actinobacteria	o__Corynebacteriales	f__Corynebacteriaceae	g__Corynebacterium	s__
ASV001966	8_chize	0.018	18.5.2021	2021	Breeding	France	Chize forest	46.1504	0.4242	Male	Unknown	k__Bacteria	p__Actinobacteriota	c__Actinobacteria	o__Corynebacteriales	f__Corynebacteriaceae	g__Corynebacterium	s__
ASV002576	LV18	0.018	19.9.2020	2020	Autumn	Latvia	Pape	56.1625	21.0656	Female	Adult	k__Bacteria	p__Proteobacteria	c__Gammaproteobacteria	o__Enterobacterales	f__Enterobacteriaceae	g__Escherichia-Shigella	s__Escherichia marmotae
ASV000003	3_denmark	0.017	11.7.2020	2020	Breeding	Denmark	Svendborg	55.0557	Oct.31	Female	Adult	k__Bacteria	p__Campylobacterota	c__Campylobacteria	o__Campylobacterales	f__Campylobacteraceae	g__Campylobacter	s__Campylobacter jejuni subsp. jejuni LMG 23211
ASV000053	6_vantaa	0.017	2.9.2020	2020	Breeding	Finland	Lansinnatus	60.249	25.118	Male	Young	k__Bacteria	p__Proteobacteria	c__Gammaproteobacteria	o__Enterobacterales	f__Enterobacteriaceae	g__Escherichia-Shigella	s__Escherichia coli
ASV000156	2_vantaa	0.017	2.9.2020	2020	Breeding	Finland	Lansinnatus	60.249	25.118	Male	Young	k__Bacteria	p__Proteobacteria	c__Gammaproteobacteria	o__Pseudomonadales	f__Pseudomonadaceae	g__Pseudomonas	s__Pseudomonas yamanorum
ASV001218	D2	0.017	12.5.2021	2021	Breeding	France	Chize forest	46.1269	0.4244	Male	Unknown	k__Bacteria	p__Firmicutes	c__Bacilli	o__Mycoplasmatales	f__Mycoplasmataceae	g__Ureaplasma	s__
ASV001322	LV31	0.017	26.9.2020	2020	Autumn	Latvia	Pape	56.1625	21.0656	Male	Young	k__Bacteria	p__Proteobacteria	c__Gammaproteobacteria	o__Enterobacterales	f__Enterobacteriaceae	g__Escherichia-Shigella	s__Escherichia coli
ASV001664	A809586	0.017	11.8.2020	2020	Breeding	Finland	Hanko	59.8283	22.9659	Female	Young	k__Bacteria	p__Firmicutes	c__Bacilli	o__Staphylococcales	f__Staphylococcaceae	g__Staphylococcus	s__Staphylococcus epidermidis
ASV002304	8A85329	0.017	5.8.2020	2020	Breeding	Denmark	Tinning Mose	56.266	9.957	Male	Young	k__Bacteria	p__Proteobacteria	c__Gammaproteobacteria	o__Enterobacterales	f__Enterobacteriaceae	g__Escherichia-Shigella	s__Escherichia marmotae
ASV004626	9_denmark	0.017	21.7.2020	2020	Breeding	Denmark	Svendborg	55.0557	Oct.31	Female	Adult	k__Bacteria	p__Proteobacteria	c__Gammaproteobacteria	o__Pseudomonadales	f__Pseudomonadaceae	g__Pseudomonas	s__Pseudomonas antarctica
ASV000068	8_vantaa	0.016	2.9.2020	2020	Breeding	Finland	Lansinnatus	60.249	25.118	Male	Young	k__Bacteria	p__Firmicutes	c__Bacilli	o__Mycoplasmatales	f__Mycoplasmataceae	g__Mycoplasma	s__Mycoplasma penetrans HF-2
ASV000129	LV24	0.016	20.9.2020	2020	Autumn	Latvia	Pape	56.1625	21.0656	Male	Adult	k__Bacteria	p__Campylobacterota	c__Campylobacteria	o__Campylobacterales	f__Helicobacteraceae	g__Helicobacter	s__Helicobacter sp. 'B52D Seymour'
ASV001425	12_vantaa	0.016	29.9.2020	2020	Autumn	Finland	Lansinnatus	60.249	25.118	Male	Adult	k__Bacteria	p__Actinobacteriota	c__Actinobacteria	o__Corynebacteriales	f__Mycobacteriaceae	g__Mycobacterium	s__
ASV001447	LV09	0.016	17.9.2020	2020	Autumn	Latvia	Pape	56.1625	21.0656	Male	Young	k__Bacteria	p__Firmicutes	c__Bacilli	o__Lactobacillales	f__Enterococcaceae	g__Enterococcus	s__Enterococcus cecorum
ASV001885	A810987	0.016	24.3.2021	2021	Spring	Finland	Hanko	59.8283	22.9659	Male	Adult	k__Bacteria	p__Firmicutes	c__Bacilli	o__Mycoplasmatales	f__Mycoplasmataceae	g__Ureaplasma	s__
ASV002215	LV09	0.016	17.9.2020	2020	Autumn	Latvia	Pape	56.1625	21.0656	Male	Young	k__Bacteria	p__Firmicutes	c__Bacilli	o__Lactobacillales	f__Enterococcaceae	g__Enterococcus	s__Enterococcus cecorum DSM 20682 = ATCC 43198
ASV002520	6_chize	0.016	18.5.2021	2021	Breeding	France	Chize forest	46.1504	0.4242	Female	Unknown	k__Bacteria	p__Firmicutes	c__Clostridia	o__Clostridiales	f__Clostridiaceae	g__Clostridium sensu stricto 1	s__
ASV003272	9_denmark	0.016	21.7.2020	2020	Breeding	Denmark	Svendborg	55.0557	Oct.31	Female	Adult	k__Bacteria	p__Firmicutes	c__Bacilli	o__Staphylococcales	f__Staphylococcaceae	g__Staphylococcus	s__Staphylococcus xylosus
ASV000030	A810994	0.015	26.3.2021	2021	Spring	Finland	Hanko	59.8283	22.9659	Female	Adult	k__Bacteria	p__Firmicutes	c__Bacilli	o__Mycoplasmatales	f__Mycoplasmataceae	g__Ureaplasma	s__
ASV000179	5_vantaa	0.015	2.9.2020	2020	Breeding	Finland	Lansinnatus	60.249	25.118	Female	Young	k__Bacteria	p__Campylobacterota	c__Campylobacteria	o__Campylobacterales	f__Campylobacteraceae	g__Campylobacter	s__Campylobacter jejuni subsp. jejuni LMG 23269
ASV000179	LV47	0.015	30.9.2020	2020	Autumn	Latvia	Pape	56.1625	21.0656	Female	Young	k__Bacteria	p__Campylobacterota	c__Campylobacteria	o__Campylobacterales	f__Campylobacteraceae	g__Campylobacter	s__Campylobacter jejuni subsp. jejuni LMG 23269
ASV000211	A811018	0.015	26.3.2021	2021	Spring	Finland	Hanko	59.8283	22.9659	Female	Adult	k__Bacteria	p__Proteobacteria	c__Gammaproteobacteria	o__Enterobacterales	f__Enterobacteriaceae	g__Escherichia-Shigella	s__Escherichia coli
ASV000450	3_denmark	0.015	11.7.2020	2020	Breeding	Denmark	Svendborg	55.0557	Oct.31	Female	Adult	k__Bacteria	p__Firmicutes	c__Bacilli	o__Lactobacillales	f__Streptococcaceae	g__Streptococcus	s__Streptococcus equinus ATCC 700338
ASV000732	8E13246	0.015	Unknown	2020	NA	Denmark	Tinning Mose	56.266	9.957	Female	Adult	k__Bacteria	p__Firmicutes	c__Clostridia	o__Clostridiales	f__Clostridiaceae	g__Clostridium sensu stricto 1	s__Clostridium sp. Marseille-P2414
ASV001535	A811018	0.015	26.3.2021	2021	Spring	Finland	Hanko	59.8283	22.9659	Female	Adult	k__Bacteria	p__Proteobacteria	c__Gammaproteobacteria	o__Enterobacterales	f__Enterobacteriaceae	g__Escherichia-Shigella	s__Escherichia coli
ASV001694	A810991	0.015	25.3.2021	2021	Spring	Finland	Hanko	59.8283	22.9659	Male	Adult	k__Bacteria	p__Proteobacteria	c__Gammaproteobacteria	o__Enterobacterales	f__Enterobacteriaceae	g__Escherichia-Shigella	s__Escherichia coli
ASV002843	6_denmark	0.015	21.7.2020	2020	Breeding	Denmark	Svendborg	55.0557	Oct.31	Unknown	Young	k__Bacteria	p__Proteobacteria	c__Gammaproteobacteria	o__Pseudomonadales	f__Pseudomonadaceae	g__Pseudomonas	s__Pseudomonas putida
ASV000029	LV32	0.014	27.9.2020	2020	Autumn	Latvia	Pape	56.1625	21.0656	Female	Young	k__Bacteria	p__Campylobacterota	c__Campylobacteria	o__Campylobacterales	f__Helicobacteraceae	g__Helicobacter	s__Helicobacter sp. 'B52D Seymour'
ASV000067	A810920	0.014	12.8.2020	2020	Breeding	Finland	Hanko	59.8283	22.9659	Male	Young	k__Bacteria	p__Proteobacteria	c__Gammaproteobacteria	o__Enterobacterales	f__Enterobacteriaceae	g__Escherichia-Shigella	s__Escherichia coli S88
ASV000068	7_denmark	0.014	21.7.2020	2020	Breeding	Denmark	Svendborg	55.0557	Oct.31	Female	Adult	k__Bacteria	p__Firmicutes	c__Bacilli	o__Mycoplasmatales	f__Mycoplasmataceae	g__Mycoplasma	s__Mycoplasma penetrans HF-2
ASV000156	A810994	0.014	26.3.2021	2021	Spring	Finland	Hanko	59.8283	22.9659	Female	Adult	k__Bacteria	p__Proteobacteria	c__Gammaproteobacteria	o__Pseudomonadales	f__Pseudomonadaceae	g__Pseudomonas	s__Pseudomonas yamanorum
ASV000211	8A85329	0.014	5.8.2020	2020	Breeding	Denmark	Tinning Mose	56.266	9.957	Male	Young	k__Bacteria	p__Proteobacteria	c__Gammaproteobacteria	o__Enterobacterales	f__Enterobacteriaceae	g__Escherichia-Shigella	s__Escherichia coli
ASV001084	A809582	0.014	9.8.2020	2020	Breeding	Finland	Hanko	59.8283	22.9659	Male	Young	k__Bacteria	p__Proteobacteria	c__Gammaproteobacteria	o__Enterobacterales	f__Enterobacteriaceae	g__Escherichia-Shigella	s__Escherichia marmotae
ASV001400	8A85331	0.014	28.8.2020	2020	Breeding	Denmark	Tinning Mose	56.266	9.957	Male	Adult	k__Bacteria	p__Proteobacteria	c__Gammaproteobacteria	o__Enterobacterales	f__Enterobacteriaceae	g__Escherichia-Shigella	s__Escherichia coli
ASV002535	8_vantaa	0.014	2.9.2020	2020	Breeding	Finland	Lansinnatus	60.249	25.118	Male	Young	k__Bacteria	p__Proteobacteria	c__Gammaproteobacteria	o__Enterobacterales	f__Enterobacteriaceae	g__Escherichia-Shigella	s__Escherichia coli
ASV002737	LV09	0.014	17.9.2020	2020	Autumn	Latvia	Pape	56.1625	21.0656	Male	Young	k__Bacteria	p__Firmicutes	c__Bacilli	o__Lactobacillales	f__Enterococcaceae	g__Enterococcus	s__Enterococcus cecorum DSM 20682 = ATCC 43198
ASV003288	A810984	0.014	23.3.2021	2021	Spring	Finland	Hanko	59.8283	22.9659	Female	Adult	k__Bacteria	p__Actinobacteriota	c__Actinobacteria	o__Corynebacteriales	f__Corynebacteriaceae	g__Corynebacterium	s__
ASV003745	A810984	0.014	23.3.2021	2021	Spring	Finland	Hanko	59.8283	22.9659	Female	Adult	k__Bacteria	p__Proteobacteria	c__Gammaproteobacteria	o__Enterobacterales	f__Enterobacteriaceae	g__Escherichia-Shigella	s__Escherichia coli
ASV005892	A810984	0.014	23.3.2021	2021	Spring	Finland	Hanko	59.8283	22.9659	Female	Adult	k__Bacteria	p__Actinobacteriota	c__Actinobacteria	o__Corynebacteriales	f__Mycobacteriaceae	g__Mycobacterium	s__
ASV000089	2_denmark	0.013	11.7.2020	2020	Breeding	Denmark	Svendborg	55.0557	Oct.31	Male	Adult	k__Bacteria	p__Firmicutes	c__Bacilli	o__Mycoplasmatales	f__Mycoplasmataceae	g__Mycoplasma	s__Mycoplasma penetrans HF-2
ASV000089	8_vantaa	0.013	2.9.2020	2020	Breeding	Finland	Lansinnatus	60.249	25.118	Male	Young	k__Bacteria	p__Firmicutes	c__Bacilli	o__Mycoplasmatales	f__Mycoplasmataceae	g__Mycoplasma	s__Mycoplasma penetrans HF-2
ASV000179	11_vantaa	0.013	14.9.2020	2020	Breeding	Finland	Lansinnatus	60.249	25.118	Male	Adult	k__Bacteria	p__Campylobacterota	c__Campylobacteria	o__Campylobacterales	f__Campylobacteraceae	g__Campylobacter	s__Campylobacter jejuni subsp. jejuni LMG 23269
ASV000465	2_vantaa	0.013	2.9.2020	2020	Breeding	Finland	Lansinnatus	60.249	25.118	Male	Young	k__Bacteria	p__Firmicutes	c__Bacilli	o__Staphylococcales	f__Staphylococcaceae	g__Staphylococcus	s__Staphylococcus epidermidis
ASV001602	13_vantaa	0.013	1.10.2020	2020	Autumn	Finland	Lansinnatus	60.249	25.118	Male	Adult	k__Bacteria	p__Proteobacteria	c__Gammaproteobacteria	o__Enterobacterales	f__Enterobacteriaceae	g__Escherichia-Shigella	s__Escherichia marmotae
ASV002112	D28	0.013	31.5.2021	2021	Breeding	France	Chize forest	46.1201	0.4585	Male	Unknown	k__Bacteria	p__Firmicutes	c__Bacilli	o__Mycoplasmatales	f__Mycoplasmataceae	g__Mycoplasma	s__Malacoplasma microti
ASV002614	LV09	0.013	17.9.2020	2020	Autumn	Latvia	Pape	56.1625	21.0656	Male	Young	k__Bacteria	p__Firmicutes	c__Bacilli	o__Lactobacillales	f__Enterococcaceae	g__Enterococcus	s__Enterococcus cecorum
ASV000029	LV29	0.012	23.9.2020	2020	Autumn	Latvia	Pape	56.1625	21.0656	Female	Young	k__Bacteria	p__Campylobacterota	c__Campylobacteria	o__Campylobacterales	f__Helicobacteraceae	g__Helicobacter	s__Helicobacter sp. 'B52D Seymour'
ASV000156	A810991	0.012	25.3.2021	2021	Spring	Finland	Hanko	59.8283	22.9659	Male	Adult	k__Bacteria	p__Proteobacteria	c__Gammaproteobacteria	o__Pseudomonadales	f__Pseudomonadaceae	g__Pseudomonas	s__Pseudomonas yamanorum
ASV000179	11_denmark	0.012	1.8.2020	2020	Breeding	Denmark	Svendborg	55.0557	Oct.31	Male	Adult	k__Bacteria	p__Campylobacterota	c__Campylobacteria	o__Campylobacterales	f__Campylobacteraceae	g__Campylobacter	s__Campylobacter jejuni subsp. jejuni LMG 23269
ASV000423	1_denmark	0.012	11.7.2020	2020	Breeding	Denmark	Svendborg	55.0557	Oct.31	Male	Adult	k__Bacteria	p__Firmicutes	c__Clostridia	o__Clostridiales	f__Clostridiaceae	g__Clostridium sensu stricto 1	s__Clostridium perfringens NCTC 8239
ASV000573	D15	0.012	18.5.2021	2021	Breeding	France	Chize forest	46.1319	0.4387	Male	Unknown	k__Bacteria	p__Firmicutes	c__Bacilli	o__Mycoplasmatales	f__Mycoplasmataceae	g__Mycoplasma	s__Mycoplasma moatsii ATCC 27625
ASV000753	12_vantaa	0.012	29.9.2020	2020	Autumn	Finland	Lansinnatus	60.249	25.118	Male	Adult	k__Bacteria	p__Proteobacteria	c__Gammaproteobacteria	o__Enterobacterales	f__Yersiniaceae	g__Serratia	s__Serratia sp. 3ACOL1
ASV000936	12_denmark	0.012	16.8.2020	2020	Breeding	Denmark	Bagenkop	54.728	Oct.52	Unknown	Young	k__Bacteria	p__Proteobacteria	c__Gammaproteobacteria	o__Pseudomonadales	f__Pseudomonadaceae	g__Pseudomonas	s__Pseudomonas lundensis
ASV001161	A810989	0.012	24.3.2021	2021	Spring	Finland	Hanko	59.8283	22.9659	Male	Adult	k__Bacteria	p__Firmicutes	c__Clostridia	o__Clostridiales	f__Clostridiaceae	g__Clostridium sensu stricto 1	s__Clostridium perfringens
ASV001617	9_vantaa	0.012	14.9.2020	2020	Breeding	Finland	Lansinnatus	60.249	25.118	Female	Young	k__Bacteria	p__Proteobacteria	c__Gammaproteobacteria	o__Enterobacterales	f__Enterobacteriaceae	g__Escherichia-Shigella	s__Escherichia marmotae
ASV001668	A810989	0.012	24.3.2021	2021	Spring	Finland	Hanko	59.8283	22.9659	Male	Adult	k__Bacteria	p__Firmicutes	c__Clostridia	o__Clostridiales	f__Clostridiaceae	g__Clostridium sensu stricto 1	s__Clostridium perfringens
ASV001834	LV02	0.012	21.8.2020	2020	Breeding	Latvia	Pape	56.1625	21.0656	Female	Young	k__Bacteria	p__Firmicutes	c__Bacilli	o__Staphylococcales	f__Staphylococcaceae	g__Staphylococcus	s__Staphylococcus agnetis
ASV002108	A809583	0.012	9.8.2020	2020	Breeding	Finland	Hanko	59.8283	22.9659	Male	Young	k__Bacteria	p__Proteobacteria	c__Gammaproteobacteria	o__Enterobacterales	f__Enterobacteriaceae	g__Escherichia-Shigella	s__Escherichia albertii
ASV003773	A810984	0.012	23.3.2021	2021	Spring	Finland	Hanko	59.8283	22.9659	Female	Adult	k__Bacteria	p__Proteobacteria	c__Gammaproteobacteria	o__Enterobacterales	f__Enterobacteriaceae	g__Escherichia-Shigella	s__Escherichia marmotae
ASV003777	A810984	0.012	23.3.2021	2021	Spring	Finland	Hanko	59.8283	22.9659	Female	Adult	k__Bacteria	p__Firmicutes	c__Bacilli	o__Lactobacillales	f__Streptococcaceae	g__Streptococcus	s__Streptococcus sinensis
ASV000029	D26	0.011	20.5.2021	2021	Breeding	France	Chize forest	46.0979	0.4134	Female	Unknown	k__Bacteria	p__Campylobacterota	c__Campylobacteria	o__Campylobacterales	f__Helicobacteraceae	g__Helicobacter	s__Helicobacter sp. 'B52D Seymour'
ASV000035	D2	0.011	12.5.2021	2021	Breeding	France	Chize forest	46.1269	0.4244	Male	Unknown	k__Bacteria	p__Firmicutes	c__Bacilli	o__Mycoplasmatales	f__Mycoplasmataceae	g__Mycoplasma	s__Malacoplasma microti
ASV000068	1_denmark	0.011	11.7.2020	2020	Breeding	Denmark	Svendborg	55.0557	Oct.31	Male	Adult	k__Bacteria	p__Firmicutes	c__Bacilli	o__Mycoplasmatales	f__Mycoplasmataceae	g__Mycoplasma	s__Mycoplasma penetrans HF-2
ASV000184	A811018	0.011	26.3.2021	2021	Spring	Finland	Hanko	59.8283	22.9659	Female	Adult	k__Bacteria	p__Proteobacteria	c__Gammaproteobacteria	o__Enterobacterales	f__Enterobacteriaceae	g__Escherichia-Shigella	s__Escherichia coli 55989
ASV000484	8A85329	0.011	5.8.2020	2020	Breeding	Denmark	Tinning Mose	56.266	9.957	Male	Young	k__Bacteria	p__Proteobacteria	c__Gammaproteobacteria	o__Enterobacterales	f__Enterobacteriaceae	g__Escherichia-Shigella	s__Escherichia coli IAI39
ASV000573	8_vantaa	0.011	2.9.2020	2020	Breeding	Finland	Lansinnatus	60.249	25.118	Male	Young	k__Bacteria	p__Firmicutes	c__Bacilli	o__Mycoplasmatales	f__Mycoplasmataceae	g__Mycoplasma	s__Mycoplasma moatsii ATCC 27625
ASV000573	D26	0.011	20.5.2021	2021	Breeding	France	Chize forest	46.0979	0.4134	Female	Unknown	k__Bacteria	p__Firmicutes	c__Bacilli	o__Mycoplasmatales	f__Mycoplasmataceae	g__Mycoplasma	s__Mycoplasma moatsii ATCC 27625
ASV000936	11_denmark	0.011	1.8.2020	2020	Breeding	Denmark	Svendborg	55.0557	Oct.31	Male	Adult	k__Bacteria	p__Proteobacteria	c__Gammaproteobacteria	o__Pseudomonadales	f__Pseudomonadaceae	g__Pseudomonas	s__Pseudomonas lundensis
ASV000951	11_denmark	0.011	1.8.2020	2020	Breeding	Denmark	Svendborg	55.0557	Oct.31	Male	Adult	k__Bacteria	p__Proteobacteria	c__Gammaproteobacteria	o__Pseudomonadales	f__Pseudomonadaceae	g__Pseudomonas	s__Pseudomonas sp. S09G 359
ASV001080	14_vantaa	0.011	1.10.2020	2020	Autumn	Finland	Lansinnatus	60.249	25.118	Male	Adult	k__Bacteria	p__Proteobacteria	c__Gammaproteobacteria	o__Enterobacterales	f__Enterobacteriaceae	g__Escherichia-Shigella	s__Escherichia albertii
ASV001301	D15	0.011	18.5.2021	2021	Breeding	France	Chize forest	46.1319	0.4387	Male	Unknown	k__Bacteria	p__Firmicutes	c__Clostridia	o__Clostridiales	f__Clostridiaceae	g__Clostridium sensu stricto 1	s__
ASV001701	7_vantaa	0.011	2.9.2020	2020	Breeding	Finland	Lansinnatus	60.249	25.118	Male	Young	k__Bacteria	p__Firmicutes	c__Bacilli	o__Bacillales	f__Bacillaceae	g__Bacillus	s__Bacillus mycoides DSM 2048
ASV001777	8A85331	0.011	28.8.2020	2020	Breeding	Denmark	Tinning Mose	56.266	9.957	Male	Adult	k__Bacteria	p__Proteobacteria	c__Gammaproteobacteria	o__Pseudomonadales	f__Pseudomonadaceae	g__Pseudomonas	s__Pseudomonas sp. S09G 359
ASV001790	12_vantaa	0.011	29.9.2020	2020	Autumn	Finland	Lansinnatus	60.249	25.118	Male	Adult	k__Bacteria	p__Proteobacteria	c__Alphaproteobacteria	o__Rickettsiales	f__Rickettsiaceae	g__Rickettsia	s__Rickettsia bellii
ASV002084	14_chize	0.011	31.5.2021	2021	Breeding	France	Chize forest	46.1523	0.437	Female	Unknown	k__Bacteria	p__Firmicutes	c__Clostridia	o__Clostridiales	f__Clostridiaceae	g__Clostridium sensu stricto 1	s__Clostridium sp. Marseille-P2414
ASV002088	8_chize	0.011	18.5.2021	2021	Breeding	France	Chize forest	46.1504	0.4242	Male	Unknown	k__Bacteria	p__Firmicutes	c__Clostridia	o__Clostridiales	f__Clostridiaceae	g__Clostridium sensu stricto 1	s__Clostridium sp. Marseille-P2414
ASV002109	2_vantaa	0.011	2.9.2020	2020	Breeding	Finland	Lansinnatus	60.249	25.118	Male	Young	k__Bacteria	p__Firmicutes	c__Bacilli	o__Staphylococcales	f__Staphylococcaceae	g__Staphylococcus	s__Staphylococcus epidermidis
ASV002665	A810987	0.011	24.3.2021	2021	Spring	Finland	Hanko	59.8283	22.9659	Male	Adult	k__Bacteria	p__Actinobacteriota	c__Actinobacteria	o__Corynebacteriales	f__Mycobacteriaceae	g__Mycobacterium	s__
ASV003499	2_vantaa	0.011	2.9.2020	2020	Breeding	Finland	Lansinnatus	60.249	25.118	Male	Young	k__Bacteria	p__Firmicutes	c__Clostridia	o__Clostridiales	f__Caloramatoraceae	g__Clostridium	s__Clostridium cylindrosporum
ASV003630	1_denmark	0.011	11.7.2020	2020	Breeding	Denmark	Svendborg	55.0557	Oct.31	Male	Adult	k__Bacteria	p__Proteobacteria	c__Gammaproteobacteria	o__Enterobacterales	f__Enterobacteriaceae	g__Escherichia-Shigella	s__Escherichia marmotae
ASV003685	A810987	0.011	24.3.2021	2021	Spring	Finland	Hanko	59.8283	22.9659	Male	Adult	k__Bacteria	p__Firmicutes	c__Clostridia	o__Clostridiales	f__Clostridiaceae	g__Clostridium sensu stricto 1	s__Clostridium sp. Marseille-P2414
ASV004535	12_denmark	0.011	16.8.2020	2020	Breeding	Denmark	Bagenkop	54.728	Oct.52	Unknown	Young	k__Bacteria	p__Firmicutes	c__Clostridia	o__Clostridiales	f__Clostridiaceae	g__Clostridium sensu stricto 1	s__Clostridium sp. Marseille-P2414
ASV008024	9_denmark	0.011	21.7.2020	2020	Breeding	Denmark	Svendborg	55.0557	Oct.31	Female	Adult	k__Bacteria	p__Firmicutes	c__Clostridia	o__Clostridiales	f__Clostridiaceae	g__Clostridium sensu stricto 1	s__
ASV000008	8E13246	0.01	Unknown	2020	NA	Denmark	Tinning Mose	56.266	9.957	Female	Adult	k__Bacteria	p__Campylobacterota	c__Campylobacteria	o__Campylobacterales	f__Campylobacteraceae	g__Campylobacter	s__Campylobacter sp. RM16704
ASV000017	8A85324	0.01	30.7.2020	2020	Breeding	Denmark	Tinning Mose	56.266	9.957	Male	Adult	k__Bacteria	p__Proteobacteria	c__Gammaproteobacteria	o__Enterobacterales	f__Enterobacteriaceae	g__Escherichia-Shigella	s__Escherichia marmotae
ASV000035	19_vantaa	0.01	13.10.2020	2020	Autumn	Finland	Lansinnatus	60.249	25.118	Male	Adult	k__Bacteria	p__Firmicutes	c__Bacilli	o__Mycoplasmatales	f__Mycoplasmataceae	g__Mycoplasma	s__Malacoplasma microti
ASV000053	D15	0.01	18.5.2021	2021	Breeding	France	Chize forest	46.1319	0.4387	Male	Unknown	k__Bacteria	p__Proteobacteria	c__Gammaproteobacteria	o__Enterobacterales	f__Enterobacteriaceae	g__Escherichia-Shigella	s__Escherichia coli
ASV000089	7_vantaa	0.01	2.9.2020	2020	Breeding	Finland	Lansinnatus	60.249	25.118	Male	Young	k__Bacteria	p__Firmicutes	c__Bacilli	o__Mycoplasmatales	f__Mycoplasmataceae	g__Mycoplasma	s__Mycoplasma penetrans HF-2
ASV000089	2_vantaa	0.01	2.9.2020	2020	Breeding	Finland	Lansinnatus	60.249	25.118	Male	Young	k__Bacteria	p__Firmicutes	c__Bacilli	o__Mycoplasmatales	f__Mycoplasmataceae	g__Mycoplasma	s__Mycoplasma penetrans HF-2
ASV000218	A686083	0.01	25.9.2020	2020	Autumn	Finland	Karjaa	60.0715	23.662	Male	Young	k__Bacteria	p__Proteobacteria	c__Gammaproteobacteria	o__Enterobacterales	f__Yersiniaceae	g__Serratia	s__Serratia fonticola
ASV000502	6_chize	0.01	18.5.2021	2021	Breeding	France	Chize forest	46.1504	0.4242	Female	Unknown	k__Bacteria	p__Proteobacteria	c__Gammaproteobacteria	o__Pseudomonadales	f__Pseudomonadaceae	g__Pseudomonas	s__Pseudomonas protegens
ASV000733	9_denmark	0.01	21.7.2020	2020	Breeding	Denmark	Svendborg	55.0557	Oct.31	Female	Adult	k__Bacteria	p__Proteobacteria	c__Gammaproteobacteria	o__Pseudomonadales	f__Pseudomonadaceae	g__Pseudomonas	s__Pseudomonas sp. S09G 359
ASV001216	2_denmark	0.01	11.7.2020	2020	Breeding	Denmark	Svendborg	55.0557	Oct.31	Male	Adult	k__Bacteria	p__Firmicutes	c__Bacilli	o__Mycoplasmatales	f__Mycoplasmataceae	g__Ureaplasma	s__
ASV001382	LV29	0.01	23.9.2020	2020	Autumn	Latvia	Pape	56.1625	21.0656	Female	Young	k__Bacteria	p__Proteobacteria	c__Gammaproteobacteria	o__Enterobacterales	f__Enterobacteriaceae	g__Escherichia-Shigella	s__Escherichia albertii
ASV001723	D15	0.01	18.5.2021	2021	Breeding	France	Chize forest	46.1319	0.4387	Male	Unknown	k__Bacteria	p__Firmicutes	c__Clostridia	o__Clostridiales	f__Clostridiaceae	g__Clostridium sensu stricto 1	s__
ASV001768	8E13246	0.01	Unknown	2020	NA	Denmark	Tinning Mose	56.266	9.957	Female	Adult	k__Bacteria	p__Proteobacteria	c__Gammaproteobacteria	o__Enterobacterales	f__Enterobacteriaceae	g__Escherichia-Shigella	s__Escherichia marmotae
ASV001813	LV30	0.01	25.9.2020	2020	Autumn	Latvia	Pape	56.1625	21.0656	Female	Young	k__Bacteria	p__Firmicutes	c__Bacilli	o__Staphylococcales	f__Staphylococcaceae	g__Staphylococcus	s__Staphylococcus epidermidis
ASV001918	D15	0.01	18.5.2021	2021	Breeding	France	Chize forest	46.1319	0.4387	Male	Unknown	k__Bacteria	p__Proteobacteria	c__Gammaproteobacteria	o__Enterobacterales	f__Enterobacteriaceae	g__Escherichia-Shigella	s__Escherichia coli
ASV002054	LV09	0.01	17.9.2020	2020	Autumn	Latvia	Pape	56.1625	21.0656	Male	Young	k__Bacteria	p__Firmicutes	c__Bacilli	o__Lactobacillales	f__Enterococcaceae	g__Enterococcus	s__Enterococcus cecorum DSM 20682 = ATCC 43198
ASV002165	8A85286	0.01	19.8.2020	2020	Breeding	Denmark	Tinning Mose	56.266	9.957	Male	Young	k__Bacteria	p__Proteobacteria	c__Gammaproteobacteria	o__Pseudomonadales	f__Pseudomonadaceae	g__Pseudomonas	s__Pseudomonas sp. MYb193
ASV002257	A686080	0.01	23.9.2020	2020	Autumn	Finland	Karjaa	60.0715	23.662	Male	Young	k__Bacteria	p__Firmicutes	c__Bacilli	o__Mycoplasmatales	f__Mycoplasmataceae	g__Ureaplasma	s__
ASV002409	2_vantaa	0.01	2.9.2020	2020	Breeding	Finland	Lansinnatus	60.249	25.118	Male	Young	k__Bacteria	p__Firmicutes	c__Bacilli	o__Lactobacillales	f__Enterococcaceae	g__Enterococcus	s__Enterococcus gilvus
ASV002428	A686067	0.01	31.5.2020	2020	Breeding	Finland	Karjaa	60.0715	23.662	Male	Adult	k__Bacteria	p__Firmicutes	c__Clostridia	o__Clostridiales	f__Clostridiaceae	g__Clostridium sensu stricto 1	s__Clostridium perfringens NCTC 8239
ASV002612	5_vantaa	0.01	2.9.2020	2020	Breeding	Finland	Lansinnatus	60.249	25.118	Female	Young	k__Bacteria	p__Actinobacteriota	c__Actinobacteria	o__Corynebacteriales	f__Mycobacteriaceae	g__Mycobacterium	s__
ASV002787	A810984	0.01	23.3.2021	2021	Spring	Finland	Hanko	59.8283	22.9659	Female	Adult	k__Bacteria	p__Firmicutes	c__Bacilli	o__Bacillales	f__Bacillaceae	g__Bacillus	s__
ASV003067	6_chize	0.01	18.5.2021	2021	Breeding	France	Chize forest	46.1504	0.4242	Female	Unknown	k__Bacteria	p__Actinobacteriota	c__Actinobacteria	o__Corynebacteriales	f__Mycobacteriaceae	g__Mycobacterium	s__
ASV003503	8A85322	0.01	20.7.2020	2020	Breeding	Denmark	Tinning Mose	56.266	9.957	Female	Adult	k__Bacteria	p__Proteobacteria	c__Gammaproteobacteria	o__Enterobacterales	f__Enterobacteriaceae	g__Escherichia-Shigella	s__Escherichia marmotae
ASV000052	LV36	0.009	28.9.2020	2020	Autumn	Latvia	Pape	56.1625	21.0656	Female	Young	k__Bacteria	p__Proteobacteria	c__Gammaproteobacteria	o__Enterobacterales	f__Enterobacteriaceae	g__Escherichia-Shigella	s__Escherichia coli
ASV000068	A686081	0.009	24.9.2020	2020	Autumn	Finland	Karjaa	60.0715	23.662	Male	Young	k__Bacteria	p__Firmicutes	c__Bacilli	o__Mycoplasmatales	f__Mycoplasmataceae	g__Mycoplasma	s__Mycoplasma penetrans HF-2
ASV000179	A686068	0.009	5.10.2020	2020	Autumn	Finland	Karjaa	60.0715	23.662	Male	Young	k__Bacteria	p__Campylobacterota	c__Campylobacteria	o__Campylobacterales	f__Campylobacteraceae	g__Campylobacter	s__Campylobacter jejuni subsp. jejuni LMG 23269
ASV000710	A811018	0.009	26.3.2021	2021	Spring	Finland	Hanko	59.8283	22.9659	Female	Adult	k__Bacteria	p__Proteobacteria	c__Gammaproteobacteria	o__Enterobacterales	f__Enterobacteriaceae	g__Escherichia-Shigella	s__Escherichia albertii
ASV001352	1_denmark	0.009	11.7.2020	2020	Breeding	Denmark	Svendborg	55.0557	Oct.31	Male	Adult	k__Bacteria	p__Proteobacteria	c__Gammaproteobacteria	o__Enterobacterales	f__Enterobacteriaceae	g__Citrobacter	s__Citrobacter werkmanii
ASV001368	A810992	0.009	25.3.2021	2021	Spring	Finland	Hanko	59.8283	22.9659	Female	Adult	k__Bacteria	p__Proteobacteria	c__Gammaproteobacteria	o__Pseudomonadales	f__Pseudomonadaceae	g__Pseudomonas	s__Pseudomonas fragi
ASV001644	12_vantaa	0.009	29.9.2020	2020	Autumn	Finland	Lansinnatus	60.249	25.118	Male	Adult	k__Bacteria	p__Proteobacteria	c__Gammaproteobacteria	o__Burkholderiales	f__Burkholderiaceae	g__Burkholderia-Caballeronia-Paraburkholderia	s__
ASV001653	2_vantaa	0.009	2.9.2020	2020	Breeding	Finland	Lansinnatus	60.249	25.118	Male	Young	k__Bacteria	p__Bacteroidota	c__Bacteroidia	o__Bacteroidales	f__Bacteroidaceae	g__Bacteroides	s__
ASV001942	14_vantaa	0.009	1.10.2020	2020	Autumn	Finland	Lansinnatus	60.249	25.118	Male	Adult	k__Bacteria	p__Campylobacterota	c__Campylobacteria	o__Campylobacterales	f__Campylobacteraceae	g__Campylobacter	s__Campylobacter jejuni subsp. jejuni LMG 23269
ASV001973	A686067	0.009	31.5.2020	2020	Breeding	Finland	Karjaa	60.0715	23.662	Male	Adult	k__Bacteria	p__Firmicutes	c__Clostridia	o__Clostridiales	f__Clostridiaceae	g__Clostridium sensu stricto 1	s__
ASV002309	7_vantaa	0.009	2.9.2020	2020	Breeding	Finland	Lansinnatus	60.249	25.118	Male	Young	k__Bacteria	p__Proteobacteria	c__Gammaproteobacteria	o__Enterobacterales	f__Enterobacteriaceae	g__Escherichia-Shigella	s__Escherichia coli
ASV002313	A686078	0.009	4.6.2020	2020	Breeding	Finland	Karjaa	60.0715	23.662	Male	Adult	k__Bacteria	p__Proteobacteria	c__Gammaproteobacteria	o__Enterobacterales	f__Aeromonadaceae	g__Aeromonas	s__Aeromonas salmonicida subsp. salmonicida 01-B526
ASV002484	A810989	0.009	24.3.2021	2021	Spring	Finland	Hanko	59.8283	22.9659	Male	Adult	k__Bacteria	p__Firmicutes	c__Clostridia	o__Clostridiales	f__Clostridiaceae	g__Clostridium sensu stricto 1	s__Clostridium perfringens NCTC 8239
ASV003072	10_chize	0.009	20.5.2021	2021	Breeding	France	Chize forest	46.1578	0.4308	Male	Unknown	k__Bacteria	p__Firmicutes	c__Bacilli	o__Mycoplasmatales	f__Mycoplasmataceae	g__Ureaplasma	s__
ASV003164	13_denmark	0.009	14.9.2020	2020	Breeding	Denmark	Bagenkop	54.728	Oct.52	Male	Young	k__Bacteria	p__Proteobacteria	c__Gammaproteobacteria	o__Pseudomonadales	f__Pseudomonadaceae	g__Pseudomonas	s__Pseudomonas lurida
ASV003318	6_chize	0.009	18.5.2021	2021	Breeding	France	Chize forest	46.1504	0.4242	Female	Unknown	k__Bacteria	p__Firmicutes	c__Bacilli	o__Bacillales	f__Bacillaceae	g__Bacillus	s__Bacillus simplex
ASV004006	8E13246	0.009	Unknown	2020	NA	Denmark	Tinning Mose	56.266	9.957	Female	Adult	k__Bacteria	p__Proteobacteria	c__Gammaproteobacteria	o__Enterobacterales	f__Enterobacteriaceae	g__Escherichia-Shigella	s__Escherichia marmotae
ASV004399	2_vantaa	0.009	2.9.2020	2020	Breeding	Finland	Lansinnatus	60.249	25.118	Male	Young	k__Bacteria	p__Firmicutes	c__Bacilli	o__Lactobacillales	f__Streptococcaceae	g__Streptococcus	s__Streptococcus sp. oral taxon 431
ASV004484	14_denmark	0.009	20.9.2020	2020	Autumn	Denmark	Hjulby	55.3422	Oct.66	Male	Young	k__Bacteria	p__Proteobacteria	c__Gammaproteobacteria	o__Enterobacterales	f__Yersiniaceae	g__Serratia	s__Serratia fonticola
ASV004537	A810984	0.009	23.3.2021	2021	Spring	Finland	Hanko	59.8283	22.9659	Female	Adult	k__Bacteria	p__Firmicutes	c__Bacilli	o__Lactobacillales	f__Streptococcaceae	g__Streptococcus	s__Streptococcus salivarius subsp. thermophilus
ASV004778	A810992	0.009	25.3.2021	2021	Spring	Finland	Hanko	59.8283	22.9659	Female	Adult	k__Bacteria	p__Proteobacteria	c__Alphaproteobacteria	o__Rickettsiales	f__Rickettsiaceae	g__Rickettsia	s__Rickettsia bellii
ASV006332	A810994	0.009	26.3.2021	2021	Spring	Finland	Hanko	59.8283	22.9659	Female	Adult	k__Bacteria	p__Firmicutes	c__Bacilli	o__Bacillales	f__Bacillaceae	g__Bacillus	s__Bacillus mycoides DSM 2048
ASV000003	A810983	0.008	23.3.2021	2021	Spring	Finland	Hanko	59.8283	22.9659	Male	Adult	k__Bacteria	p__Campylobacterota	c__Campylobacteria	o__Campylobacterales	f__Campylobacteraceae	g__Campylobacter	s__Campylobacter jejuni subsp. jejuni LMG 23211
ASV000029	7_denmark	0.008	21.7.2020	2020	Breeding	Denmark	Svendborg	55.0557	Oct.31	Female	Adult	k__Bacteria	p__Campylobacterota	c__Campylobacteria	o__Campylobacterales	f__Helicobacteraceae	g__Helicobacter	s__Helicobacter sp. 'B52D Seymour'
ASV000052	7_vantaa	0.008	2.9.2020	2020	Breeding	Finland	Lansinnatus	60.249	25.118	Male	Young	k__Bacteria	p__Proteobacteria	c__Gammaproteobacteria	o__Enterobacterales	f__Enterobacteriaceae	g__Escherichia-Shigella	s__Escherichia coli
ASV000068	D26	0.008	20.5.2021	2021	Breeding	France	Chize forest	46.0979	0.4134	Female	Unknown	k__Bacteria	p__Firmicutes	c__Bacilli	o__Mycoplasmatales	f__Mycoplasmataceae	g__Mycoplasma	s__Mycoplasma penetrans HF-2
ASV000089	A686080	0.008	23.9.2020	2020	Autumn	Finland	Karjaa	60.0715	23.662	Male	Young	k__Bacteria	p__Firmicutes	c__Bacilli	o__Mycoplasmatales	f__Mycoplasmataceae	g__Mycoplasma	s__Mycoplasma penetrans HF-2
ASV000089	11_denmark	0.008	1.8.2020	2020	Breeding	Denmark	Svendborg	55.0557	Oct.31	Male	Adult	k__Bacteria	p__Firmicutes	c__Bacilli	o__Mycoplasmatales	f__Mycoplasmataceae	g__Mycoplasma	s__Mycoplasma penetrans HF-2
ASV000156	A810912	0.008	9.8.2020	2020	Breeding	Finland	Hanko	59.8283	22.9659	Female	Young	k__Bacteria	p__Proteobacteria	c__Gammaproteobacteria	o__Pseudomonadales	f__Pseudomonadaceae	g__Pseudomonas	s__Pseudomonas yamanorum
ASV000156	A810987	0.008	24.3.2021	2021	Spring	Finland	Hanko	59.8283	22.9659	Male	Adult	k__Bacteria	p__Proteobacteria	c__Gammaproteobacteria	o__Pseudomonadales	f__Pseudomonadaceae	g__Pseudomonas	s__Pseudomonas yamanorum
ASV000256	8A85331	0.008	28.8.2020	2020	Breeding	Denmark	Tinning Mose	56.266	9.957	Male	Adult	k__Bacteria	p__Firmicutes	c__Bacilli	o__Staphylococcales	f__Staphylococcaceae	g__Staphylococcus	s__Staphylococcus agnetis
ASV000683	12_vantaa	0.008	29.9.2020	2020	Autumn	Finland	Lansinnatus	60.249	25.118	Male	Adult	k__Bacteria	p__Proteobacteria	c__Gammaproteobacteria	o__Pseudomonadales	f__Moraxellaceae	g__Acinetobacter	s__
ASV000683	1_denmark	0.008	11.7.2020	2020	Breeding	Denmark	Svendborg	55.0557	Oct.31	Male	Adult	k__Bacteria	p__Proteobacteria	c__Gammaproteobacteria	o__Pseudomonadales	f__Moraxellaceae	g__Acinetobacter	s__
ASV000798	1_vantaa	0.008	1.9.2020	2020	Breeding	Finland	Lansinnatus	60.249	25.118	Male	Young	k__Bacteria	p__Firmicutes	c__Bacilli	o__Mycoplasmatales	f__Mycoplasmataceae	g__Mycoplasma	s__Mycoplasma moatsii ATCC 27625
ASV000936	8A85329	0.008	5.8.2020	2020	Breeding	Denmark	Tinning Mose	56.266	9.957	Male	Young	k__Bacteria	p__Proteobacteria	c__Gammaproteobacteria	o__Pseudomonadales	f__Pseudomonadaceae	g__Pseudomonas	s__Pseudomonas lundensis
ASV001080	LV02	0.008	21.8.2020	2020	Breeding	Latvia	Pape	56.1625	21.0656	Female	Young	k__Bacteria	p__Proteobacteria	c__Gammaproteobacteria	o__Enterobacterales	f__Enterobacteriaceae	g__Escherichia-Shigella	s__Escherichia albertii
ASV001301	A810987	0.008	24.3.2021	2021	Spring	Finland	Hanko	59.8283	22.9659	Male	Adult	k__Bacteria	p__Firmicutes	c__Clostridia	o__Clostridiales	f__Clostridiaceae	g__Clostridium sensu stricto 1	s__
ASV001467	A811018	0.008	26.3.2021	2021	Spring	Finland	Hanko	59.8283	22.9659	Female	Adult	k__Bacteria	p__Proteobacteria	c__Gammaproteobacteria	o__Enterobacterales	f__Enterobacteriaceae	g__Escherichia-Shigella	s__Escherichia coli
ASV001687	A810920	0.008	12.8.2020	2020	Breeding	Finland	Hanko	59.8283	22.9659	Male	Young	k__Bacteria	p__Proteobacteria	c__Gammaproteobacteria	o__Enterobacterales	f__Enterobacteriaceae	g__Escherichia-Shigella	s__Escherichia albertii
ASV001701	6_vantaa	0.008	2.9.2020	2020	Breeding	Finland	Lansinnatus	60.249	25.118	Male	Young	k__Bacteria	p__Firmicutes	c__Bacilli	o__Bacillales	f__Bacillaceae	g__Bacillus	s__Bacillus mycoides DSM 2048
ASV001802	LV36	0.008	28.9.2020	2020	Autumn	Latvia	Pape	56.1625	21.0656	Female	Young	k__Bacteria	p__Proteobacteria	c__Gammaproteobacteria	o__Enterobacterales	f__Enterobacteriaceae	g__Escherichia-Shigella	s__Escherichia marmotae
ASV002088	D15	0.008	18.5.2021	2021	Breeding	France	Chize forest	46.1319	0.4387	Male	Unknown	k__Bacteria	p__Firmicutes	c__Clostridia	o__Clostridiales	f__Clostridiaceae	g__Clostridium sensu stricto 1	s__Clostridium sp. Marseille-P2414
ASV002299	A810920	0.008	12.8.2020	2020	Breeding	Finland	Hanko	59.8283	22.9659	Male	Young	k__Bacteria	p__Proteobacteria	c__Gammaproteobacteria	o__Enterobacterales	f__Enterobacteriaceae	g__Escherichia-Shigella	s__Escherichia albertii
ASV002522	6_vantaa	0.008	2.9.2020	2020	Breeding	Finland	Lansinnatus	60.249	25.118	Male	Young	k__Bacteria	p__Proteobacteria	c__Gammaproteobacteria	o__Enterobacterales	f__Yersiniaceae	g__Serratia	s__Rahnella sp. 'CDC 21234'
ASV002832	LV09	0.008	17.9.2020	2020	Autumn	Latvia	Pape	56.1625	21.0656	Male	Young	k__Bacteria	p__Firmicutes	c__Bacilli	o__Bacillales	f__Bacillaceae	g__Bacillus	s__Bacillus thermoamylovorans
ASV002865	13_denmark	0.008	14.9.2020	2020	Breeding	Denmark	Bagenkop	54.728	Oct.52	Male	Young	k__Bacteria	p__Proteobacteria	c__Gammaproteobacteria	o__Pseudomonadales	f__Pseudomonadaceae	g__Pseudomonas	s__Pseudomonas sp. S09G 359
ASV003004	8E13246	0.008	Unknown	2020	NA	Denmark	Tinning Mose	56.266	9.957	Female	Adult	k__Bacteria	p__Proteobacteria	c__Gammaproteobacteria	o__Enterobacterales	f__Enterobacteriaceae	g__Escherichia-Shigella	s__Escherichia marmotae
ASV003102	LV09	0.008	17.9.2020	2020	Autumn	Latvia	Pape	56.1625	21.0656	Male	Young	k__Bacteria	p__Firmicutes	c__Bacilli	o__Lactobacillales	f__Enterococcaceae	g__Enterococcus	s__Enterococcus cecorum
ASV003404	5_vantaa	0.008	2.9.2020	2020	Breeding	Finland	Lansinnatus	60.249	25.118	Female	Young	k__Bacteria	p__Proteobacteria	c__Gammaproteobacteria	o__Pseudomonadales	f__Pseudomonadaceae	g__Pseudomonas	s__Pseudomonas orientalis
ASV004279	8A85329	0.008	5.8.2020	2020	Breeding	Denmark	Tinning Mose	56.266	9.957	Male	Young	k__Bacteria	p__Proteobacteria	c__Gammaproteobacteria	o__Enterobacterales	f__Enterobacteriaceae	g__Escherichia-Shigella	s__Escherichia marmotae
ASV004300	5_vantaa	0.008	2.9.2020	2020	Breeding	Finland	Lansinnatus	60.249	25.118	Female	Young	k__Bacteria	p__Proteobacteria	c__Gammaproteobacteria	o__Legionellales	f__Legionellaceae	g__Legionella	s__Legionella tunisiensis
ASV004454	8A85329	0.008	5.8.2020	2020	Breeding	Denmark	Tinning Mose	56.266	9.957	Male	Young	k__Bacteria	p__Firmicutes	c__Clostridia	o__Clostridiales	f__Clostridiaceae	g__Clostridium sensu stricto 1	s__Clostridium perfringens
ASV004609	8A85329	0.008	5.8.2020	2020	Breeding	Denmark	Tinning Mose	56.266	9.957	Male	Young	k__Bacteria	p__Firmicutes	c__Clostridia	o__Clostridiales	f__Clostridiaceae	g__Clostridium sensu stricto 1	s__Clostridium perfringens
ASV005127	A810984	0.008	23.3.2021	2021	Spring	Finland	Hanko	59.8283	22.9659	Female	Adult	k__Bacteria	p__Actinobacteriota	c__Actinobacteria	o__Corynebacteriales	f__Mycobacteriaceae	g__Mycobacterium	s__
ASV005394	LV13	0.008	19.9.2020	2020	Autumn	Latvia	Pape	56.1625	21.0656	Female	Adult	k__Bacteria	p__Firmicutes	c__Bacilli	o__Bacillales	f__Bacillaceae	g__Bacillus	s__Bacillus longiquaesitum
ASV005434	8_vantaa	0.008	2.9.2020	2020	Breeding	Finland	Lansinnatus	60.249	25.118	Male	Young	k__Bacteria	p__Proteobacteria	c__Gammaproteobacteria	o__Enterobacterales	f__Enterobacteriaceae	g__Enterobacter	s__
ASV005868	A810991	0.008	25.3.2021	2021	Spring	Finland	Hanko	59.8283	22.9659	Male	Adult	k__Bacteria	p__Campylobacterota	c__Campylobacteria	o__Campylobacterales	f__Campylobacteraceae	g__Campylobacter	s__Campylobacter jejuni subsp. jejuni LMG 9872
ASV007500	9_denmark	0.008	21.7.2020	2020	Breeding	Denmark	Svendborg	55.0557	Oct.31	Female	Adult	k__Bacteria	p__Firmicutes	c__Clostridia	o__Clostridiales	f__Clostridiaceae	g__Clostridium sensu stricto 1	s__
ASV011194	1_vantaa	0.008	1.9.2020	2020	Breeding	Finland	Lansinnatus	60.249	25.118	Male	Young	k__Bacteria	p__Proteobacteria	c__Gammaproteobacteria	o__Pseudomonadales	f__Pseudomonadaceae	g__Pseudomonas	s__
ASV000008	2_denmark	0.007	11.7.2020	2020	Breeding	Denmark	Svendborg	55.0557	Oct.31	Male	Adult	k__Bacteria	p__Campylobacterota	c__Campylobacteria	o__Campylobacterales	f__Campylobacteraceae	g__Campylobacter	s__Campylobacter sp. RM16704
ASV000008	A810987	0.007	24.3.2021	2021	Spring	Finland	Hanko	59.8283	22.9659	Male	Adult	k__Bacteria	p__Campylobacterota	c__Campylobacteria	o__Campylobacterales	f__Campylobacteraceae	g__Campylobacter	s__Campylobacter sp. RM16704
ASV000086	A686083	0.007	25.9.2020	2020	Autumn	Finland	Karjaa	60.0715	23.662	Male	Young	k__Bacteria	p__Firmicutes	c__Bacilli	o__Lactobacillales	f__Enterococcaceae	g__Enterococcus	s__Enterococcus crotali
ASV000089	16_denmark	0.007	22.9.2020	2020	Autumn	Denmark	Bagenkop	54.728	Oct.52	Male	Young	k__Bacteria	p__Firmicutes	c__Bacilli	o__Mycoplasmatales	f__Mycoplasmataceae	g__Mycoplasma	s__Mycoplasma penetrans HF-2
ASV000089	8A85324	0.007	30.7.2020	2020	Breeding	Denmark	Tinning Mose	56.266	9.957	Male	Adult	k__Bacteria	p__Firmicutes	c__Bacilli	o__Mycoplasmatales	f__Mycoplasmataceae	g__Mycoplasma	s__Mycoplasma penetrans HF-2
ASV000179	A686081	0.007	24.9.2020	2020	Autumn	Finland	Karjaa	60.0715	23.662	Male	Young	k__Bacteria	p__Campylobacterota	c__Campylobacteria	o__Campylobacterales	f__Campylobacteraceae	g__Campylobacter	s__Campylobacter jejuni subsp. jejuni LMG 23269
ASV000450	8A85324	0.007	30.7.2020	2020	Breeding	Denmark	Tinning Mose	56.266	9.957	Male	Adult	k__Bacteria	p__Firmicutes	c__Bacilli	o__Lactobacillales	f__Streptococcaceae	g__Streptococcus	s__Streptococcus equinus ATCC 700338
ASV000683	11_denmark	0.007	1.8.2020	2020	Breeding	Denmark	Svendborg	55.0557	Oct.31	Male	Adult	k__Bacteria	p__Proteobacteria	c__Gammaproteobacteria	o__Pseudomonadales	f__Moraxellaceae	g__Acinetobacter	s__
ASV000742	12_vantaa	0.007	29.9.2020	2020	Autumn	Finland	Lansinnatus	60.249	25.118	Male	Adult	k__Bacteria	p__Proteobacteria	c__Gammaproteobacteria	o__Pseudomonadales	f__Pseudomonadaceae	g__Pseudomonas	s__Pseudomonas yamanorum
ASV000755	A686081	0.007	24.9.2020	2020	Autumn	Finland	Karjaa	60.0715	23.662	Male	Young	k__Bacteria	p__Proteobacteria	c__Gammaproteobacteria	o__Enterobacterales	f__Enterobacteriaceae	g__Enterobacter	s__Klebsiella aerogenes
ASV000836	A686067	0.007	31.5.2020	2020	Breeding	Finland	Karjaa	60.0715	23.662	Male	Adult	k__Bacteria	p__Firmicutes	c__Bacilli	o__Mycoplasmatales	f__Mycoplasmataceae	g__Ureaplasma	s__
ASV001187	LV31	0.007	26.9.2020	2020	Autumn	Latvia	Pape	56.1625	21.0656	Male	Young	k__Bacteria	p__Proteobacteria	c__Gammaproteobacteria	o__Enterobacterales	f__Enterobacteriaceae	g__Citrobacter	s__Citrobacter werkmanii
ASV001467	A810920	0.007	12.8.2020	2020	Breeding	Finland	Hanko	59.8283	22.9659	Male	Young	k__Bacteria	p__Proteobacteria	c__Gammaproteobacteria	o__Enterobacterales	f__Enterobacteriaceae	g__Escherichia-Shigella	s__Escherichia coli
ASV001758	14_chize	0.007	31.5.2021	2021	Breeding	France	Chize forest	46.1523	0.437	Female	Unknown	k__Bacteria	p__Firmicutes	c__Bacilli	o__Mycoplasmatales	f__Mycoplasmataceae	g__Ureaplasma	s__
ASV001770	16_denmark	0.007	22.9.2020	2020	Autumn	Denmark	Bagenkop	54.728	Oct.52	Male	Young	k__Bacteria	p__Proteobacteria	c__Gammaproteobacteria	o__Enterobacterales	f__Enterobacteriaceae	g__Escherichia-Shigella	s__Escherichia marmotae
ASV001797	A809582	0.007	9.8.2020	2020	Breeding	Finland	Hanko	59.8283	22.9659	Male	Young	k__Bacteria	p__Proteobacteria	c__Gammaproteobacteria	o__Enterobacterales	f__Enterobacteriaceae	g__Escherichia-Shigella	s__Escherichia marmotae
ASV002047	D27	0.007	27.5.2021	2021	Breeding	France	Chize forest	46.0951	0.4133	Female	Unknown	k__Bacteria	p__Firmicutes	c__Clostridia	o__Clostridiales	f__Clostridiaceae	g__Clostridium sensu stricto 1	s__Clostridium sp. Marseille-P2414
ASV002053	LV29	0.007	23.9.2020	2020	Autumn	Latvia	Pape	56.1625	21.0656	Female	Young	k__Bacteria	p__Proteobacteria	c__Gammaproteobacteria	o__Enterobacterales	f__Enterobacteriaceae	g__Escherichia-Shigella	s__Escherichia marmotae
ASV002511	12_vantaa	0.007	29.9.2020	2020	Autumn	Finland	Lansinnatus	60.249	25.118	Male	Adult	k__Bacteria	p__Actinobacteriota	c__Actinobacteria	o__Corynebacteriales	f__Mycobacteriaceae	g__Mycobacterium	s__
ASV002527	9_vantaa	0.007	14.9.2020	2020	Breeding	Finland	Lansinnatus	60.249	25.118	Female	Young	k__Bacteria	p__Proteobacteria	c__Gammaproteobacteria	o__Enterobacterales	f__Enterobacteriaceae	g__Escherichia-Shigella	s__Escherichia albertii
ASV002622	LV13	0.007	19.9.2020	2020	Autumn	Latvia	Pape	56.1625	21.0656	Female	Adult	k__Bacteria	p__Actinobacteriota	c__Actinobacteria	o__Corynebacteriales	f__Mycobacteriaceae	g__Mycobacterium	s__
ASV002677	A809582	0.007	9.8.2020	2020	Breeding	Finland	Hanko	59.8283	22.9659	Male	Young	k__Bacteria	p__Proteobacteria	c__Gammaproteobacteria	o__Pseudomonadales	f__Moraxellaceae	g__Acinetobacter	s__
ASV002750	8_vantaa	0.007	2.9.2020	2020	Breeding	Finland	Lansinnatus	60.249	25.118	Male	Young	k__Bacteria	p__Proteobacteria	c__Gammaproteobacteria	o__Enterobacterales	f__Enterobacteriaceae	g__Escherichia-Shigella	s__Escherichia coli
ASV002811	LV09	0.007	17.9.2020	2020	Autumn	Latvia	Pape	56.1625	21.0656	Male	Young	k__Bacteria	p__Firmicutes	c__Bacilli	o__Bacillales	f__Bacillaceae	g__Bacillus	s__Bacillus thermoamylovorans
ASV003287	A810989	0.007	24.3.2021	2021	Spring	Finland	Hanko	59.8283	22.9659	Male	Adult	k__Bacteria	p__Campylobacterota	c__Campylobacteria	o__Campylobacterales	f__Campylobacteraceae	g__Campylobacter	s__Campylobacter sp. RM16704
ASV003372	5_vantaa	0.007	2.9.2020	2020	Breeding	Finland	Lansinnatus	60.249	25.118	Female	Young	k__Bacteria	p__Proteobacteria	c__Gammaproteobacteria	o__Enterobacterales	f__Yersiniaceae	g__Serratia	s__Ewingella americana
ASV003679	12_denmark	0.007	16.8.2020	2020	Breeding	Denmark	Bagenkop	54.728	Oct.52	Unknown	Young	k__Bacteria	p__Proteobacteria	c__Gammaproteobacteria	o__Enterobacterales	f__Aeromonadaceae	g__Aeromonas	s__
ASV003710	A686068	0.007	5.10.2020	2020	Autumn	Finland	Karjaa	60.0715	23.662	Male	Young	k__Bacteria	p__Proteobacteria	c__Gammaproteobacteria	o__Enterobacterales	f__Yersiniaceae	g__Yersinia	s__Yersinia kristensenii
ASV003891	13_vantaa	0.007	1.10.2020	2020	Autumn	Finland	Lansinnatus	60.249	25.118	Male	Adult	k__Bacteria	p__Actinobacteriota	c__Actinobacteria	o__Corynebacteriales	f__Mycobacteriaceae	g__Mycobacterium	s__
ASV003903	6_chize	0.007	18.5.2021	2021	Breeding	France	Chize forest	46.1504	0.4242	Female	Unknown	k__Bacteria	p__Actinobacteriota	c__Actinobacteria	o__Corynebacteriales	f__Mycobacteriaceae	g__Mycobacterium	s__
ASV003991	A809582	0.007	9.8.2020	2020	Breeding	Finland	Hanko	59.8283	22.9659	Male	Young	k__Bacteria	p__Proteobacteria	c__Gammaproteobacteria	o__Enterobacterales	f__Enterobacteriaceae	g__Escherichia-Shigella	s__Escherichia marmotae
ASV004398	LV29	0.007	23.9.2020	2020	Autumn	Latvia	Pape	56.1625	21.0656	Female	Young	k__Bacteria	p__Proteobacteria	c__Gammaproteobacteria	o__Enterobacterales	f__Enterobacteriaceae	g__Escherichia-Shigella	s__Escherichia marmotae
ASV004521	LV02	0.007	21.8.2020	2020	Breeding	Latvia	Pape	56.1625	21.0656	Female	Young	k__Bacteria	p__Proteobacteria	c__Gammaproteobacteria	o__Enterobacterales	f__Enterobacteriaceae	g__Escherichia-Shigella	s__Escherichia albertii
ASV004528	13_vantaa	0.007	1.10.2020	2020	Autumn	Finland	Lansinnatus	60.249	25.118	Male	Adult	k__Bacteria	p__Proteobacteria	c__Gammaproteobacteria	o__Enterobacterales	f__Aeromonadaceae	g__Aeromonas	s__Aeromonas eucrenophila
ASV005063	A810987	0.007	24.3.2021	2021	Spring	Finland	Hanko	59.8283	22.9659	Male	Adult	k__Bacteria	p__Proteobacteria	c__Gammaproteobacteria	o__Enterobacterales	f__Enterobacteriaceae	g__Escherichia-Shigella	s__Escherichia albertii
ASV005138	12_denmark	0.007	16.8.2020	2020	Breeding	Denmark	Bagenkop	54.728	Oct.52	Unknown	Young	k__Bacteria	p__Proteobacteria	c__Gammaproteobacteria	o__Enterobacterales	f__Aeromonadaceae	g__Aeromonas	s__
ASV005148	14_denmark	0.007	20.9.2020	2020	Autumn	Denmark	Hjulby	55.3422	Oct.66	Male	Young	k__Bacteria	p__Firmicutes	c__Clostridia	o__Clostridiales	f__Clostridiaceae	g__Clostridium sensu stricto 1	s__
ASV005326	A686068	0.007	5.10.2020	2020	Autumn	Finland	Karjaa	60.0715	23.662	Male	Young	k__Bacteria	p__Firmicutes	c__Bacilli	o__Bacillales	f__Bacillaceae	g__Bacillus	s__Bacillus altitudinis
ASV009555	1_denmark	0.007	11.7.2020	2020	Breeding	Denmark	Svendborg	55.0557	Oct.31	Male	Adult	k__Bacteria	p__Firmicutes	c__Bacilli	o__Bacillales	f__Bacillaceae	g__Bacillus	s__
ASV011120	2_denmark	0.007	11.7.2020	2020	Breeding	Denmark	Svendborg	55.0557	Oct.31	Male	Adult	k__Bacteria	p__Firmicutes	c__Bacilli	o__Mycoplasmatales	f__Mycoplasmataceae	g__Mycoplasma	s__Mycoplasma moatsii ATCC 27625
ASV018549	1_vantaa	0.007	1.9.2020	2020	Breeding	Finland	Lansinnatus	60.249	25.118	Male	Young	k__Bacteria	p__Proteobacteria	c__Gammaproteobacteria	o__Pseudomonadales	f__Pseudomonadaceae	g__Pseudomonas	s__Pseudomonas viridiflava
ASV000003	A809585	0.006	11.8.2020	2020	Breeding	Finland	Hanko	59.8283	22.9659	Male	Young	k__Bacteria	p__Campylobacterota	c__Campylobacteria	o__Campylobacterales	f__Campylobacteraceae	g__Campylobacter	s__Campylobacter jejuni subsp. jejuni LMG 23211
ASV000007	A686080	0.006	23.9.2020	2020	Autumn	Finland	Karjaa	60.0715	23.662	Male	Young	k__Bacteria	p__Proteobacteria	c__Gammaproteobacteria	o__Enterobacterales	f__Enterobacteriaceae	g__Escherichia-Shigella	s__Escherichia marmotae
ASV000068	7_vantaa	0.006	2.9.2020	2020	Breeding	Finland	Lansinnatus	60.249	25.118	Male	Young	k__Bacteria	p__Firmicutes	c__Bacilli	o__Mycoplasmatales	f__Mycoplasmataceae	g__Mycoplasma	s__Mycoplasma penetrans HF-2
ASV000156	A810992	0.006	25.3.2021	2021	Spring	Finland	Hanko	59.8283	22.9659	Female	Adult	k__Bacteria	p__Proteobacteria	c__Gammaproteobacteria	o__Pseudomonadales	f__Pseudomonadaceae	g__Pseudomonas	s__Pseudomonas yamanorum
ASV000179	7_denmark	0.006	21.7.2020	2020	Breeding	Denmark	Svendborg	55.0557	Oct.31	Female	Adult	k__Bacteria	p__Campylobacterota	c__Campylobacteria	o__Campylobacterales	f__Campylobacteraceae	g__Campylobacter	s__Campylobacter jejuni subsp. jejuni LMG 23269
ASV000423	12_denmark	0.006	16.8.2020	2020	Breeding	Denmark	Bagenkop	54.728	Oct.52	Unknown	Young	k__Bacteria	p__Firmicutes	c__Clostridia	o__Clostridiales	f__Clostridiaceae	g__Clostridium sensu stricto 1	s__Clostridium perfringens NCTC 8239
ASV000810	9_denmark	0.006	21.7.2020	2020	Breeding	Denmark	Svendborg	55.0557	Oct.31	Female	Adult	k__Bacteria	p__Proteobacteria	c__Gammaproteobacteria	o__Pseudomonadales	f__Pseudomonadaceae	g__Pseudomonas	s__Pseudomonas lurida
ASV000951	8A85286	0.006	19.8.2020	2020	Breeding	Denmark	Tinning Mose	56.266	9.957	Male	Young	k__Bacteria	p__Proteobacteria	c__Gammaproteobacteria	o__Pseudomonadales	f__Pseudomonadaceae	g__Pseudomonas	s__Pseudomonas sp. S09G 359
ASV001981	6_denmark	0.006	21.7.2020	2020	Breeding	Denmark	Svendborg	55.0557	Oct.31	Unknown	Young	k__Bacteria	p__Proteobacteria	c__Gammaproteobacteria	o__Pseudomonadales	f__Moraxellaceae	g__Acinetobacter	s__Acinetobacter guillouiae CIP 63.46
ASV002319	8A85331	0.006	28.8.2020	2020	Breeding	Denmark	Tinning Mose	56.266	9.957	Male	Adult	k__Bacteria	p__Firmicutes	c__Bacilli	o__Staphylococcales	f__Staphylococcaceae	g__Staphylococcus	s__Staphylococcus epidermidis
ASV002368	1_denmark	0.006	11.7.2020	2020	Breeding	Denmark	Svendborg	55.0557	Oct.31	Male	Adult	k__Bacteria	p__Proteobacteria	c__Gammaproteobacteria	o__Pseudomonadales	f__Pseudomonadaceae	g__Pseudomonas	s__Pseudomonas sp. LG1D9
ASV002605	9_vantaa	0.006	14.9.2020	2020	Breeding	Finland	Lansinnatus	60.249	25.118	Female	Young	k__Bacteria	p__Proteobacteria	c__Gammaproteobacteria	o__Enterobacterales	f__Enterobacteriaceae	g__Escherichia-Shigella	s__Escherichia coli
ASV002717	A810983	0.006	23.3.2021	2021	Spring	Finland	Hanko	59.8283	22.9659	Male	Adult	k__Bacteria	p__Campylobacterota	c__Campylobacteria	o__Campylobacterales	f__Campylobacteraceae	g__Campylobacter	s__Campylobacter jejuni
ASV002802	A810987	0.006	24.3.2021	2021	Spring	Finland	Hanko	59.8283	22.9659	Male	Adult	k__Bacteria	p__Proteobacteria	c__Gammaproteobacteria	o__Pseudomonadales	f__Pseudomonadaceae	g__Pseudomonas	s__
ASV002808	A810920	0.006	12.8.2020	2020	Breeding	Finland	Hanko	59.8283	22.9659	Male	Young	k__Bacteria	p__Proteobacteria	c__Gammaproteobacteria	o__Enterobacterales	f__Enterobacteriaceae	g__Escherichia-Shigella	s__Escherichia coli 55989
ASV002810	A686083	0.006	25.9.2020	2020	Autumn	Finland	Karjaa	60.0715	23.662	Male	Young	k__Bacteria	p__Proteobacteria	c__Gammaproteobacteria	o__Enterobacterales	f__Yersiniaceae	g__Serratia	s__Rahnella sp. 'CDC 21234'
ASV002822	9_vantaa	0.006	14.9.2020	2020	Breeding	Finland	Lansinnatus	60.249	25.118	Female	Young	k__Bacteria	p__Proteobacteria	c__Gammaproteobacteria	o__Enterobacterales	f__Enterobacteriaceae	g__Escherichia-Shigella	s__Escherichia albertii
ASV002857	9_vantaa	0.006	14.9.2020	2020	Breeding	Finland	Lansinnatus	60.249	25.118	Female	Young	k__Bacteria	p__Proteobacteria	c__Gammaproteobacteria	o__Enterobacterales	f__Enterobacteriaceae	g__Escherichia-Shigella	s__Escherichia coli
ASV002972	A810988	0.006	24.3.2021	2021	Spring	Finland	Hanko	59.8283	22.9659	Male	Adult	k__Bacteria	p__Firmicutes	c__Bacilli	o__Mycoplasmatales	f__Mycoplasmataceae	g__Ureaplasma	s__
ASV003160	13_vantaa	0.006	1.10.2020	2020	Autumn	Finland	Lansinnatus	60.249	25.118	Male	Adult	k__Bacteria	p__Actinobacteriota	c__Actinobacteria	o__Corynebacteriales	f__Mycobacteriaceae	g__Mycobacterium	s__
ASV003478	13_vantaa	0.006	1.10.2020	2020	Autumn	Finland	Lansinnatus	60.249	25.118	Male	Adult	k__Bacteria	p__Campylobacterota	c__Campylobacteria	o__Campylobacterales	f__Campylobacteraceae	g__Campylobacter	s__Campylobacter jejuni subsp. jejuni LMG 23211
ASV003506	13_vantaa	0.006	1.10.2020	2020	Autumn	Finland	Lansinnatus	60.249	25.118	Male	Adult	k__Bacteria	p__Actinobacteriota	c__Actinobacteria	o__Corynebacteriales	f__Corynebacteriaceae	g__Corynebacterium	s__
ASV003525	LV02	0.006	21.8.2020	2020	Breeding	Latvia	Pape	56.1625	21.0656	Female	Young	k__Bacteria	p__Proteobacteria	c__Gammaproteobacteria	o__Enterobacterales	f__Enterobacteriaceae	g__Escherichia-Shigella	s__Escherichia coli
ASV003559	A810983	0.006	23.3.2021	2021	Spring	Finland	Hanko	59.8283	22.9659	Male	Adult	k__Bacteria	p__Campylobacterota	c__Campylobacteria	o__Campylobacterales	f__Campylobacteraceae	g__Campylobacter	s__Campylobacter jejuni
ASV003682	6_chize	0.006	18.5.2021	2021	Breeding	France	Chize forest	46.1504	0.4242	Female	Unknown	k__Bacteria	p__Actinobacteriota	c__Actinobacteria	o__Corynebacteriales	f__Mycobacteriaceae	g__Mycobacterium	s__
ASV003805	13_vantaa	0.006	1.10.2020	2020	Autumn	Finland	Lansinnatus	60.249	25.118	Male	Adult	k__Bacteria	p__Actinobacteriota	c__Actinobacteria	o__Corynebacteriales	f__Corynebacteriaceae	g__Corynebacterium	s__
ASV004035	A686083	0.006	25.9.2020	2020	Autumn	Finland	Karjaa	60.0715	23.662	Male	Young	k__Bacteria	p__Proteobacteria	c__Gammaproteobacteria	o__Enterobacterales	f__Enterobacteriaceae	g__Escherichia-Shigella	s__Escherichia albertii
ASV004072	A810994	0.006	26.3.2021	2021	Spring	Finland	Hanko	59.8283	22.9659	Female	Adult	k__Bacteria	p__Firmicutes	c__Bacilli	o__Bacillales	f__Bacillaceae	g__Bacillus	s__Bacillus simplex
ASV004087	13_vantaa	0.006	1.10.2020	2020	Autumn	Finland	Lansinnatus	60.249	25.118	Male	Adult	k__Bacteria	p__Campylobacterota	c__Campylobacteria	o__Campylobacterales	f__Campylobacteraceae	g__Campylobacter	s__Campylobacter jejuni subsp. jejuni LMG 23211
ASV004211	A810983	0.006	23.3.2021	2021	Spring	Finland	Hanko	59.8283	22.9659	Male	Adult	k__Bacteria	p__Campylobacterota	c__Campylobacteria	o__Campylobacterales	f__Campylobacteraceae	g__Campylobacter	s__Campylobacter jejuni subsp. jejuni LMG 23211
ASV004288	14_vantaa	0.006	1.10.2020	2020	Autumn	Finland	Lansinnatus	60.249	25.118	Male	Adult	k__Bacteria	p__Campylobacterota	c__Campylobacteria	o__Campylobacterales	f__Campylobacteraceae	g__Campylobacter	s__Campylobacter jejuni subsp. jejuni LMG 23211
ASV004571	8A85322	0.006	20.7.2020	2020	Breeding	Denmark	Tinning Mose	56.266	9.957	Female	Adult	k__Bacteria	p__Proteobacteria	c__Gammaproteobacteria	o__Enterobacterales	f__Enterobacteriaceae	g__Escherichia-Shigella	s__Escherichia marmotae
ASV004660	11_vantaa	0.006	14.9.2020	2020	Breeding	Finland	Lansinnatus	60.249	25.118	Male	Adult	k__Bacteria	p__Proteobacteria	c__Gammaproteobacteria	o__Pseudomonadales	f__Pseudomonadaceae	g__Pseudomonas	s__Pseudomonas jessenii
ASV004667	5_vantaa	0.006	2.9.2020	2020	Breeding	Finland	Lansinnatus	60.249	25.118	Female	Young	k__Bacteria	p__Proteobacteria	c__Gammaproteobacteria	o__Legionellales	f__Legionellaceae	g__Legionella	s__Legionella sp. R5868
ASV004669	A686067	0.006	31.5.2020	2020	Breeding	Finland	Karjaa	60.0715	23.662	Male	Adult	k__Bacteria	p__Firmicutes	c__Bacilli	o__Staphylococcales	f__Staphylococcaceae	g__Staphylococcus	s__Staphylococcus equorum
ASV005023	A686081	0.006	24.9.2020	2020	Autumn	Finland	Karjaa	60.0715	23.662	Male	Young	k__Bacteria	p__Campylobacterota	c__Campylobacteria	o__Campylobacterales	f__Campylobacteraceae	g__Campylobacter	s__Campylobacter jejuni subsp. jejuni LMG 23269
ASV005293	A811018	0.006	26.3.2021	2021	Spring	Finland	Hanko	59.8283	22.9659	Female	Adult	k__Bacteria	p__Proteobacteria	c__Gammaproteobacteria	o__Enterobacterales	f__Enterobacteriaceae	g__Escherichia-Shigella	s__Escherichia coli
ASV005320	8A85322	0.006	20.7.2020	2020	Breeding	Denmark	Tinning Mose	56.266	9.957	Female	Adult	k__Bacteria	p__Firmicutes	c__Clostridia	o__Clostridiales	f__Clostridiaceae	g__Clostridium sensu stricto 1	s__Clostridium sp. Marseille-P2414
ASV005372	A810987	0.006	24.3.2021	2021	Spring	Finland	Hanko	59.8283	22.9659	Male	Adult	k__Bacteria	p__Proteobacteria	c__Gammaproteobacteria	o__Pseudomonadales	f__Pseudomonadaceae	g__Pseudomonas	s__
ASV005488	5_vantaa	0.006	2.9.2020	2020	Breeding	Finland	Lansinnatus	60.249	25.118	Female	Young	k__Bacteria	p__Actinobacteriota	c__Actinobacteria	o__Corynebacteriales	f__Mycobacteriaceae	g__Mycobacterium	s__
ASV005921	LV13	0.006	19.9.2020	2020	Autumn	Latvia	Pape	56.1625	21.0656	Female	Adult	k__Bacteria	p__Firmicutes	c__Clostridia	o__Clostridiales	f__Clostridiaceae	g__Clostridium sensu stricto 13	s__Clostridium bowmanii
ASV006143	14_denmark	0.006	20.9.2020	2020	Autumn	Denmark	Hjulby	55.3422	Oct.66	Male	Young	k__Bacteria	p__Firmicutes	c__Clostridia	o__Clostridiales	f__Clostridiaceae	g__Clostridium sensu stricto 1	s__
ASV006314	5_vantaa	0.006	2.9.2020	2020	Breeding	Finland	Lansinnatus	60.249	25.118	Female	Young	k__Bacteria	p__Actinobacteriota	c__Actinobacteria	o__Corynebacteriales	f__Mycobacteriaceae	g__Mycobacterium	s__
ASV017176	9_denmark	0.006	21.7.2020	2020	Breeding	Denmark	Svendborg	55.0557	Oct.31	Female	Adult	k__Bacteria	p__Firmicutes	c__Clostridia	o__Clostridiales	f__Clostridiaceae	g__Clostridium sensu stricto 1	s__
ASV000003	8_vantaa	0.005	2.9.2020	2020	Breeding	Finland	Lansinnatus	60.249	25.118	Male	Young	k__Bacteria	p__Campylobacterota	c__Campylobacteria	o__Campylobacterales	f__Campylobacteraceae	g__Campylobacter	s__Campylobacter jejuni subsp. jejuni LMG 23211
ASV000003	9_vantaa	0.005	14.9.2020	2020	Breeding	Finland	Lansinnatus	60.249	25.118	Female	Young	k__Bacteria	p__Campylobacterota	c__Campylobacteria	o__Campylobacterales	f__Campylobacteraceae	g__Campylobacter	s__Campylobacter jejuni subsp. jejuni LMG 23211
ASV000003	LV32	0.005	27.9.2020	2020	Autumn	Latvia	Pape	56.1625	21.0656	Female	Young	k__Bacteria	p__Campylobacterota	c__Campylobacteria	o__Campylobacterales	f__Campylobacteraceae	g__Campylobacter	s__Campylobacter jejuni subsp. jejuni LMG 23211
ASV000007	A810983	0.005	23.3.2021	2021	Spring	Finland	Hanko	59.8283	22.9659	Male	Adult	k__Bacteria	p__Proteobacteria	c__Gammaproteobacteria	o__Enterobacterales	f__Enterobacteriaceae	g__Escherichia-Shigella	s__Escherichia marmotae
ASV000008	D13	0.005	18.5.2021	2021	Breeding	France	Chize forest	46.1126	0.4495	Male	Unknown	k__Bacteria	p__Campylobacterota	c__Campylobacteria	o__Campylobacterales	f__Campylobacteraceae	g__Campylobacter	s__Campylobacter sp. RM16704
ASV000089	14_vantaa	0.005	1.10.2020	2020	Autumn	Finland	Lansinnatus	60.249	25.118	Male	Adult	k__Bacteria	p__Firmicutes	c__Bacilli	o__Mycoplasmatales	f__Mycoplasmataceae	g__Mycoplasma	s__Mycoplasma penetrans HF-2
ASV000089	8E13246	0.005	Unknown	2020	NA	Denmark	Tinning Mose	56.266	9.957	Female	Adult	k__Bacteria	p__Firmicutes	c__Bacilli	o__Mycoplasmatales	f__Mycoplasmataceae	g__Mycoplasma	s__Mycoplasma penetrans HF-2
ASV000097	A811018	0.005	26.3.2021	2021	Spring	Finland	Hanko	59.8283	22.9659	Female	Adult	k__Bacteria	p__Proteobacteria	c__Gammaproteobacteria	o__Enterobacterales	f__Enterobacteriaceae	g__Escherichia-Shigella	s__Escherichia coli
ASV000144	A811018	0.005	26.3.2021	2021	Spring	Finland	Hanko	59.8283	22.9659	Female	Adult	k__Bacteria	p__Proteobacteria	c__Gammaproteobacteria	o__Enterobacterales	f__Enterobacteriaceae	g__Escherichia-Shigella	s__Escherichia coli
ASV000179	9_denmark	0.005	21.7.2020	2020	Breeding	Denmark	Svendborg	55.0557	Oct.31	Female	Adult	k__Bacteria	p__Campylobacterota	c__Campylobacteria	o__Campylobacterales	f__Campylobacteraceae	g__Campylobacter	s__Campylobacter jejuni subsp. jejuni LMG 23269
ASV000193	14_vantaa	0.005	1.10.2020	2020	Autumn	Finland	Lansinnatus	60.249	25.118	Male	Adult	k__Bacteria	p__Proteobacteria	c__Gammaproteobacteria	o__Enterobacterales	f__Enterobacteriaceae	g__Escherichia-Shigella	s__Escherichia coli
ASV000258	A686083	0.005	25.9.2020	2020	Autumn	Finland	Karjaa	60.0715	23.662	Male	Young	k__Bacteria	p__Firmicutes	c__Bacilli	o__Lactobacillales	f__Enterococcaceae	g__Enterococcus	s__Enterococcus faecalis ATCC 27275
ASV000288	A811018	0.005	26.3.2021	2021	Spring	Finland	Hanko	59.8283	22.9659	Female	Adult	k__Bacteria	p__Proteobacteria	c__Gammaproteobacteria	o__Enterobacterales	f__Enterobacteriaceae	g__Escherichia-Shigella	s__Escherichia coli
ASV000423	D13	0.005	18.5.2021	2021	Breeding	France	Chize forest	46.1126	0.4495	Male	Unknown	k__Bacteria	p__Firmicutes	c__Clostridia	o__Clostridiales	f__Clostridiaceae	g__Clostridium sensu stricto 1	s__Clostridium perfringens NCTC 8239
ASV000502	2_vantaa	0.005	2.9.2020	2020	Breeding	Finland	Lansinnatus	60.249	25.118	Male	Young	k__Bacteria	p__Proteobacteria	c__Gammaproteobacteria	o__Pseudomonadales	f__Pseudomonadaceae	g__Pseudomonas	s__Pseudomonas protegens
ASV000502	12_vantaa	0.005	29.9.2020	2020	Autumn	Finland	Lansinnatus	60.249	25.118	Male	Adult	k__Bacteria	p__Proteobacteria	c__Gammaproteobacteria	o__Pseudomonadales	f__Pseudomonadaceae	g__Pseudomonas	s__Pseudomonas protegens
ASV000568	A686078	0.005	4.6.2020	2020	Breeding	Finland	Karjaa	60.0715	23.662	Male	Adult	k__Bacteria	p__Campylobacterota	c__Campylobacteria	o__Campylobacterales	f__Helicobacteraceae	g__Helicobacter	s__Helicobacter anseris
ASV000573	9_vantaa	0.005	14.9.2020	2020	Breeding	Finland	Lansinnatus	60.249	25.118	Female	Young	k__Bacteria	p__Firmicutes	c__Bacilli	o__Mycoplasmatales	f__Mycoplasmataceae	g__Mycoplasma	s__Mycoplasma moatsii ATCC 27625
ASV000805	8_vantaa	0.005	2.9.2020	2020	Breeding	Finland	Lansinnatus	60.249	25.118	Male	Young	k__Bacteria	p__Proteobacteria	c__Gammaproteobacteria	o__Enterobacterales	f__Enterobacteriaceae	g__Escherichia-Shigella	s__Escherichia coli
ASV000836	A810986	0.005	24.3.2021	2021	Spring	Finland	Hanko	59.8283	22.9659	Female	Adult	k__Bacteria	p__Firmicutes	c__Bacilli	o__Mycoplasmatales	f__Mycoplasmataceae	g__Ureaplasma	s__
ASV000836	9_denmark	0.005	21.7.2020	2020	Breeding	Denmark	Svendborg	55.0557	Oct.31	Female	Adult	k__Bacteria	p__Firmicutes	c__Bacilli	o__Mycoplasmatales	f__Mycoplasmataceae	g__Ureaplasma	s__
ASV001768	A810982	0.005	22.3.2021	2021	Spring	Finland	Hanko	59.8283	22.9659	Male	Adult	k__Bacteria	p__Proteobacteria	c__Gammaproteobacteria	o__Enterobacterales	f__Enterobacteriaceae	g__Escherichia-Shigella	s__Escherichia marmotae
ASV001784	13_vantaa	0.005	1.10.2020	2020	Autumn	Finland	Lansinnatus	60.249	25.118	Male	Adult	k__Bacteria	p__Firmicutes	c__Bacilli	o__Staphylococcales	f__Staphylococcaceae	g__Staphylococcus	s__Staphylococcus epidermidis
ASV001904	12_vantaa	0.005	29.9.2020	2020	Autumn	Finland	Lansinnatus	60.249	25.118	Male	Adult	k__Bacteria	p__Actinobacteriota	c__Actinobacteria	o__Corynebacteriales	f__Mycobacteriaceae	g__Mycobacterium	s__
ASV001904	6_vantaa	0.005	2.9.2020	2020	Breeding	Finland	Lansinnatus	60.249	25.118	Male	Young	k__Bacteria	p__Actinobacteriota	c__Actinobacteria	o__Corynebacteriales	f__Mycobacteriaceae	g__Mycobacterium	s__
ASV002047	D26	0.005	20.5.2021	2021	Breeding	France	Chize forest	46.0979	0.4134	Female	Unknown	k__Bacteria	p__Firmicutes	c__Clostridia	o__Clostridiales	f__Clostridiaceae	g__Clostridium sensu stricto 1	s__Clostridium sp. Marseille-P2414
ASV002100	LV29	0.005	23.9.2020	2020	Autumn	Latvia	Pape	56.1625	21.0656	Female	Young	k__Bacteria	p__Proteobacteria	c__Gammaproteobacteria	o__Enterobacterales	f__Enterobacteriaceae	g__Escherichia-Shigella	s__Escherichia marmotae
ASV002105	8_chize	0.005	18.5.2021	2021	Breeding	France	Chize forest	46.1504	0.4242	Male	Unknown	k__Bacteria	p__Firmicutes	c__Bacilli	o__Staphylococcales	f__Staphylococcaceae	g__Staphylococcus	s__Staphylococcus epidermidis
ASV002112	D15	0.005	18.5.2021	2021	Breeding	France	Chize forest	46.1319	0.4387	Male	Unknown	k__Bacteria	p__Firmicutes	c__Bacilli	o__Mycoplasmatales	f__Mycoplasmataceae	g__Mycoplasma	s__Malacoplasma microti
ASV002368	12_denmark	0.005	16.8.2020	2020	Breeding	Denmark	Bagenkop	54.728	Oct.52	Unknown	Young	k__Bacteria	p__Proteobacteria	c__Gammaproteobacteria	o__Pseudomonadales	f__Pseudomonadaceae	g__Pseudomonas	s__Pseudomonas sp. LG1D9
ASV002392	A810988	0.005	24.3.2021	2021	Spring	Finland	Hanko	59.8283	22.9659	Male	Adult	k__Bacteria	p__Proteobacteria	c__Gammaproteobacteria	o__Enterobacterales	f__Enterobacteriaceae	g__Escherichia-Shigella	s__Escherichia marmotae
ASV002487	12_denmark	0.005	16.8.2020	2020	Breeding	Denmark	Bagenkop	54.728	Oct.52	Unknown	Young	k__Bacteria	p__Proteobacteria	c__Gammaproteobacteria	o__Enterobacterales	f__Aeromonadaceae	g__Aeromonas	s__Aeromonas encheleia
ASV002824	A810987	0.005	24.3.2021	2021	Spring	Finland	Hanko	59.8283	22.9659	Male	Adult	k__Bacteria	p__Firmicutes	c__Clostridia	o__Clostridiales	f__Clostridiaceae	g__Clostridium sensu stricto 1	s__Clostridium sp. Marseille-P2414
ASV003211	D27	0.005	27.5.2021	2021	Breeding	France	Chize forest	46.0951	0.4133	Female	Unknown	k__Bacteria	p__Firmicutes	c__Clostridia	o__Clostridiales	f__Clostridiaceae	g__Clostridium sensu stricto 1	s__Clostridium sp. Marseille-P2414
ASV003917	A810987	0.005	24.3.2021	2021	Spring	Finland	Hanko	59.8283	22.9659	Male	Adult	k__Bacteria	p__Actinobacteriota	c__Actinobacteria	o__Corynebacteriales	f__Mycobacteriaceae	g__Mycobacterium	s__
ASV004016	A810987	0.005	24.3.2021	2021	Spring	Finland	Hanko	59.8283	22.9659	Male	Adult	k__Bacteria	p__Actinobacteriota	c__Actinobacteria	o__Corynebacteriales	f__Mycobacteriaceae	g__Mycobacterium	s__
ASV004072	14_denmark	0.005	20.9.2020	2020	Autumn	Denmark	Hjulby	55.3422	Oct.66	Male	Young	k__Bacteria	p__Firmicutes	c__Bacilli	o__Bacillales	f__Bacillaceae	g__Bacillus	s__Bacillus simplex
ASV004522	LV29	0.005	23.9.2020	2020	Autumn	Latvia	Pape	56.1625	21.0656	Female	Young	k__Bacteria	p__Proteobacteria	c__Gammaproteobacteria	o__Enterobacterales	f__Enterobacteriaceae	g__Escherichia-Shigella	s__Escherichia marmotae
ASV004541	LV13	0.005	19.9.2020	2020	Autumn	Latvia	Pape	56.1625	21.0656	Female	Adult	k__Bacteria	p__Firmicutes	c__Bacilli	o__Bacillales	f__Bacillaceae	g__Bacillus	s__Bacillus megaterium NCT-2
ASV004745	12_denmark	0.005	16.8.2020	2020	Breeding	Denmark	Bagenkop	54.728	Oct.52	Unknown	Young	k__Bacteria	p__Firmicutes	c__Bacilli	o__Mycoplasmatales	f__Mycoplasmataceae	g__Ureaplasma	s__
ASV004837	2_vantaa	0.005	2.9.2020	2020	Breeding	Finland	Lansinnatus	60.249	25.118	Male	Young	k__Bacteria	p__Actinobacteriota	c__Actinobacteria	o__Corynebacteriales	f__Mycobacteriaceae	g__Mycobacterium	s__
ASV004859	11_vantaa	0.005	14.9.2020	2020	Breeding	Finland	Lansinnatus	60.249	25.118	Male	Adult	k__Bacteria	p__Actinobacteriota	c__Actinobacteria	o__Corynebacteriales	f__Mycobacteriaceae	g__Mycobacterium	s__
ASV004877	LV09	0.005	17.9.2020	2020	Autumn	Latvia	Pape	56.1625	21.0656	Male	Young	k__Bacteria	p__Firmicutes	c__Bacilli	o__Lactobacillales	f__Enterococcaceae	g__Enterococcus	s__Enterococcus cecorum DSM 20682 = ATCC 43198
ASV004982	9_denmark	0.005	21.7.2020	2020	Breeding	Denmark	Svendborg	55.0557	Oct.31	Female	Adult	k__Bacteria	p__Firmicutes	c__Clostridia	o__Clostridiales	f__Clostridiaceae	g__Clostridium sensu stricto 1	s__
ASV005107	8A85329	0.005	5.8.2020	2020	Breeding	Denmark	Tinning Mose	56.266	9.957	Male	Young	k__Bacteria	p__Firmicutes	c__Bacilli	o__Bacillales	f__Bacillaceae	g__Bacillus	s__Bacillus butanolivorans
ASV005223	5_vantaa	0.005	2.9.2020	2020	Breeding	Finland	Lansinnatus	60.249	25.118	Female	Young	k__Bacteria	p__Actinobacteriota	c__Actinobacteria	o__Corynebacteriales	f__Mycobacteriaceae	g__Mycobacterium	s__
ASV005266	14_chize	0.005	31.5.2021	2021	Breeding	France	Chize forest	46.1523	0.437	Female	Unknown	k__Bacteria	p__Firmicutes	c__Bacilli	o__Mycoplasmatales	f__Mycoplasmataceae	g__Ureaplasma	s__
ASV005333	14_denmark	0.005	20.9.2020	2020	Autumn	Denmark	Hjulby	55.3422	Oct.66	Male	Young	k__Bacteria	p__Firmicutes	c__Clostridia	o__Clostridiales	f__Clostridiaceae	g__Clostridium sensu stricto 1	s__
ASV005594	11_vantaa	0.005	14.9.2020	2020	Breeding	Finland	Lansinnatus	60.249	25.118	Male	Adult	k__Bacteria	p__Actinobacteriota	c__Actinobacteria	o__Corynebacteriales	f__Mycobacteriaceae	g__Mycobacterium	s__
ASV005723	LV13	0.005	19.9.2020	2020	Autumn	Latvia	Pape	56.1625	21.0656	Female	Adult	k__Bacteria	p__Actinobacteriota	c__Actinobacteria	o__Corynebacteriales	f__Mycobacteriaceae	g__Mycobacterium	s__
ASV005814	LV18	0.005	19.9.2020	2020	Autumn	Latvia	Pape	56.1625	21.0656	Female	Adult	k__Bacteria	p__Actinobacteriota	c__Actinobacteria	o__Corynebacteriales	f__Mycobacteriaceae	g__Mycobacterium	s__
ASV005946	14_denmark	0.005	20.9.2020	2020	Autumn	Denmark	Hjulby	55.3422	Oct.66	Male	Young	k__Bacteria	p__Firmicutes	c__Clostridia	o__Clostridiales	f__Clostridiaceae	g__Clostridium sensu stricto 1	s__
ASV005959	A686081	0.005	24.9.2020	2020	Autumn	Finland	Karjaa	60.0715	23.662	Male	Young	k__Bacteria	p__Campylobacterota	c__Campylobacteria	o__Campylobacterales	f__Campylobacteraceae	g__Campylobacter	s__Campylobacter jejuni subsp. jejuni LMG 23211
ASV005983	8_vantaa	0.005	2.9.2020	2020	Breeding	Finland	Lansinnatus	60.249	25.118	Male	Young	k__Bacteria	p__Proteobacteria	c__Gammaproteobacteria	o__Enterobacterales	f__Enterobacteriaceae	g__Escherichia-Shigella	s__Escherichia coli
ASV006672	2_vantaa	0.005	2.9.2020	2020	Breeding	Finland	Lansinnatus	60.249	25.118	Male	Young	k__Bacteria	p__Firmicutes	c__Bacilli	o__Lactobacillales	f__Streptococcaceae	g__Streptococcus	s__Streptococcus mitis
ASV006935	A810987	0.005	24.3.2021	2021	Spring	Finland	Hanko	59.8283	22.9659	Male	Adult	k__Bacteria	p__Firmicutes	c__Clostridia	o__Clostridiales	f__Clostridiaceae	g__Clostridium sensu stricto 1	s__
ASV006944	11_vantaa	0.005	14.9.2020	2020	Breeding	Finland	Lansinnatus	60.249	25.118	Male	Adult	k__Bacteria	p__Proteobacteria	c__Gammaproteobacteria	o__Enterobacterales	f__Aeromonadaceae	g__Aeromonas	s__Aeromonas popoffii
ASV006951	A810986	0.005	24.3.2021	2021	Spring	Finland	Hanko	59.8283	22.9659	Female	Adult	k__Bacteria	p__Proteobacteria	c__Gammaproteobacteria	o__Enterobacterales	f__Enterobacteriaceae	g__Escherichia-Shigella	s__Escherichia marmotae
ASV007152	10_chize	0.005	20.5.2021	2021	Breeding	France	Chize forest	46.1578	0.4308	Male	Unknown	k__Bacteria	p__Firmicutes	c__Bacilli	o__Mycoplasmatales	f__Mycoplasmataceae	g__Ureaplasma	s__
ASV007423	5_vantaa	0.005	2.9.2020	2020	Breeding	Finland	Lansinnatus	60.249	25.118	Female	Young	k__Bacteria	p__Actinobacteriota	c__Actinobacteria	o__Corynebacteriales	f__Mycobacteriaceae	g__Mycobacterium	s__
ASV007673	5_vantaa	0.005	2.9.2020	2020	Breeding	Finland	Lansinnatus	60.249	25.118	Female	Young	k__Bacteria	p__Actinobacteriota	c__Actinobacteria	o__Corynebacteriales	f__Mycobacteriaceae	g__Mycobacterium	s__
ASV007968	19_vantaa	0.005	13.10.2020	2020	Autumn	Finland	Lansinnatus	60.249	25.118	Male	Adult	k__Bacteria	p__Proteobacteria	c__Gammaproteobacteria	o__Enterobacterales	f__Yersiniaceae	g__Yersinia	s__Yersinia intermedia
ASV008037	LV18	0.005	19.9.2020	2020	Autumn	Latvia	Pape	56.1625	21.0656	Female	Adult	k__Bacteria	p__Proteobacteria	c__Gammaproteobacteria	o__Legionellales	f__Legionellaceae	g__Legionella	s__
ASV008111	6_denmark	0.005	21.7.2020	2020	Breeding	Denmark	Svendborg	55.0557	Oct.31	Unknown	Young	k__Bacteria	p__Proteobacteria	c__Gammaproteobacteria	o__Pseudomonadales	f__Moraxellaceae	g__Acinetobacter	s__Acinetobacter lwoffii ATCC 9957 = CIP 70.31
ASV008486	A810987	0.005	24.3.2021	2021	Spring	Finland	Hanko	59.8283	22.9659	Male	Adult	k__Bacteria	p__Actinobacteriota	c__Actinobacteria	o__Corynebacteriales	f__Mycobacteriaceae	g__Mycobacterium	s__
ASV009339	A686068	0.005	5.10.2020	2020	Autumn	Finland	Karjaa	60.0715	23.662	Male	Young	k__Bacteria	p__Campylobacterota	c__Campylobacteria	o__Campylobacterales	f__Helicobacteraceae	g__Helicobacter	s__Helicobacter sp. 'B52D Seymour'
ASV010371	12_denmark	0.005	16.8.2020	2020	Breeding	Denmark	Bagenkop	54.728	Oct.52	Unknown	Young	k__Bacteria	p__Firmicutes	c__Clostridia	o__Clostridiales	f__Clostridiaceae	g__Clostridium sensu stricto 1	s__Clostridium perfringens NCTC 8239
ASV014214	11_denmark	0.005	1.8.2020	2020	Breeding	Denmark	Svendborg	55.0557	Oct.31	Male	Adult	k__Bacteria	p__Proteobacteria	c__Gammaproteobacteria	o__Pseudomonadales	f__Pseudomonadaceae	g__Pseudomonas	s__Pseudomonas migulae
ASV014511	1_vantaa	0.005	1.9.2020	2020	Breeding	Finland	Lansinnatus	60.249	25.118	Male	Young	k__Bacteria	p__Proteobacteria	c__Gammaproteobacteria	o__Pseudomonadales	f__Pseudomonadaceae	g__Pseudomonas	s__Pseudomonas flavescens
ASV017294	1_vantaa	0.005	1.9.2020	2020	Breeding	Finland	Lansinnatus	60.249	25.118	Male	Young	k__Bacteria	p__Proteobacteria	c__Gammaproteobacteria	o__Pseudomonadales	f__Pseudomonadaceae	g__Pseudomonas	s__Pseudomonas rhizosphaerae
ASV017432	19_vantaa	0.005	13.10.2020	2020	Autumn	Finland	Lansinnatus	60.249	25.118	Male	Adult	k__Bacteria	p__Proteobacteria	c__Gammaproteobacteria	o__Pseudomonadales	f__Pseudomonadaceae	g__Pseudomonas	s__Pseudomonas versuta
ASV019368	A686078	0.005	4.6.2020	2020	Breeding	Finland	Karjaa	60.0715	23.662	Male	Adult	k__Bacteria	p__Firmicutes	c__Bacilli	o__Mycoplasmatales	f__Mycoplasmataceae	g__Ureaplasma	s__
ASV000008	A810992	0.004	25.3.2021	2021	Spring	Finland	Hanko	59.8283	22.9659	Female	Adult	k__Bacteria	p__Campylobacterota	c__Campylobacteria	o__Campylobacterales	f__Campylobacteraceae	g__Campylobacter	s__Campylobacter sp. RM16704
ASV000087	A686083	0.004	25.9.2020	2020	Autumn	Finland	Karjaa	60.0715	23.662	Male	Young	k__Bacteria	p__Proteobacteria	c__Gammaproteobacteria	o__Enterobacterales	f__Enterobacteriaceae	g__Escherichia-Shigella	s__Escherichia albertii
ASV000089	6_vantaa	0.004	2.9.2020	2020	Breeding	Finland	Lansinnatus	60.249	25.118	Male	Young	k__Bacteria	p__Firmicutes	c__Bacilli	o__Mycoplasmatales	f__Mycoplasmataceae	g__Mycoplasma	s__Mycoplasma penetrans HF-2
ASV000089	LV02	0.004	21.8.2020	2020	Breeding	Latvia	Pape	56.1625	21.0656	Female	Young	k__Bacteria	p__Firmicutes	c__Bacilli	o__Mycoplasmatales	f__Mycoplasmataceae	g__Mycoplasma	s__Mycoplasma penetrans HF-2
ASV000156	6_chize	0.004	18.5.2021	2021	Breeding	France	Chize forest	46.1504	0.4242	Female	Unknown	k__Bacteria	p__Proteobacteria	c__Gammaproteobacteria	o__Pseudomonadales	f__Pseudomonadaceae	g__Pseudomonas	s__Pseudomonas yamanorum
ASV000156	A686068	0.004	5.10.2020	2020	Autumn	Finland	Karjaa	60.0715	23.662	Male	Young	k__Bacteria	p__Proteobacteria	c__Gammaproteobacteria	o__Pseudomonadales	f__Pseudomonadaceae	g__Pseudomonas	s__Pseudomonas yamanorum
ASV000169	LV18	0.004	19.9.2020	2020	Autumn	Latvia	Pape	56.1625	21.0656	Female	Adult	k__Bacteria	p__Firmicutes	c__Clostridia	o__Clostridiales	f__Clostridiaceae	g__Clostridium sensu stricto 1	s__Clostridium sp. Marseille-P2414
ASV000573	D28	0.004	31.5.2021	2021	Breeding	France	Chize forest	46.1201	0.4585	Male	Unknown	k__Bacteria	p__Firmicutes	c__Bacilli	o__Mycoplasmatales	f__Mycoplasmataceae	g__Mycoplasma	s__Mycoplasma moatsii ATCC 27625
ASV000573	8E13246	0.004	Unknown	2020	NA	Denmark	Tinning Mose	56.266	9.957	Female	Adult	k__Bacteria	p__Firmicutes	c__Bacilli	o__Mycoplasmatales	f__Mycoplasmataceae	g__Mycoplasma	s__Mycoplasma moatsii ATCC 27625
ASV000648	9_vantaa	0.004	14.9.2020	2020	Breeding	Finland	Lansinnatus	60.249	25.118	Female	Young	k__Bacteria	p__Proteobacteria	c__Gammaproteobacteria	o__Enterobacterales	f__Enterobacteriaceae	g__Escherichia-Shigella	s__Escherichia coli
ASV000690	9_vantaa	0.004	14.9.2020	2020	Breeding	Finland	Lansinnatus	60.249	25.118	Female	Young	k__Bacteria	p__Campylobacterota	c__Campylobacteria	o__Campylobacterales	f__Campylobacteraceae	g__Campylobacter	s__Campylobacter jejuni subsp. jejuni LMG 23269
ASV000733	1_denmark	0.004	11.7.2020	2020	Breeding	Denmark	Svendborg	55.0557	Oct.31	Male	Adult	k__Bacteria	p__Proteobacteria	c__Gammaproteobacteria	o__Pseudomonadales	f__Pseudomonadaceae	g__Pseudomonas	s__Pseudomonas sp. S09G 359
ASV000742	13_vantaa	0.004	1.10.2020	2020	Autumn	Finland	Lansinnatus	60.249	25.118	Male	Adult	k__Bacteria	p__Proteobacteria	c__Gammaproteobacteria	o__Pseudomonadales	f__Pseudomonadaceae	g__Pseudomonas	s__Pseudomonas yamanorum
ASV000798	D15	0.004	18.5.2021	2021	Breeding	France	Chize forest	46.1319	0.4387	Male	Unknown	k__Bacteria	p__Firmicutes	c__Bacilli	o__Mycoplasmatales	f__Mycoplasmataceae	g__Mycoplasma	s__Mycoplasma moatsii ATCC 27625
ASV000920	8_vantaa	0.004	2.9.2020	2020	Breeding	Finland	Lansinnatus	60.249	25.118	Male	Young	k__Bacteria	p__Firmicutes	c__Bacilli	o__Lactobacillales	f__Enterococcaceae	g__Enterococcus	s__Enterococcus gilvus
ASV001520	12_denmark	0.004	16.8.2020	2020	Breeding	Denmark	Bagenkop	54.728	Oct.52	Unknown	Young	k__Bacteria	p__Proteobacteria	c__Gammaproteobacteria	o__Enterobacterales	f__Enterobacteriaceae	g__Escherichia-Shigella	s__Escherichia coli
ASV001694	5_vantaa	0.004	2.9.2020	2020	Breeding	Finland	Lansinnatus	60.249	25.118	Female	Young	k__Bacteria	p__Proteobacteria	c__Gammaproteobacteria	o__Enterobacterales	f__Enterobacteriaceae	g__Escherichia-Shigella	s__Escherichia coli
ASV001713	8_vantaa	0.004	2.9.2020	2020	Breeding	Finland	Lansinnatus	60.249	25.118	Male	Young	k__Bacteria	p__Firmicutes	c__Bacilli	o__Staphylococcales	f__Staphylococcaceae	g__Staphylococcus	s__Staphylococcus capitis
ASV001955	12_vantaa	0.004	29.9.2020	2020	Autumn	Finland	Lansinnatus	60.249	25.118	Male	Adult	k__Bacteria	p__Proteobacteria	c__Gammaproteobacteria	o__Pseudomonadales	f__Pseudomonadaceae	g__Pseudomonas	s__Pseudomonas sp. LG1D9
ASV001973	D26	0.004	20.5.2021	2021	Breeding	France	Chize forest	46.0979	0.4134	Female	Unknown	k__Bacteria	p__Firmicutes	c__Clostridia	o__Clostridiales	f__Clostridiaceae	g__Clostridium sensu stricto 1	s__
ASV002079	LV36	0.004	28.9.2020	2020	Autumn	Latvia	Pape	56.1625	21.0656	Female	Young	k__Bacteria	p__Proteobacteria	c__Gammaproteobacteria	o__Enterobacterales	f__Enterobacteriaceae	g__Escherichia-Shigella	s__Escherichia albertii
ASV002349	A810920	0.004	12.8.2020	2020	Breeding	Finland	Hanko	59.8283	22.9659	Male	Young	k__Bacteria	p__Proteobacteria	c__Gammaproteobacteria	o__Enterobacterales	f__Enterobacteriaceae	g__Escherichia-Shigella	s__Escherichia coli
ASV002368	11_denmark	0.004	1.8.2020	2020	Breeding	Denmark	Svendborg	55.0557	Oct.31	Male	Adult	k__Bacteria	p__Proteobacteria	c__Gammaproteobacteria	o__Pseudomonadales	f__Pseudomonadaceae	g__Pseudomonas	s__Pseudomonas sp. LG1D9
ASV002368	7_denmark	0.004	21.7.2020	2020	Breeding	Denmark	Svendborg	55.0557	Oct.31	Female	Adult	k__Bacteria	p__Proteobacteria	c__Gammaproteobacteria	o__Pseudomonadales	f__Pseudomonadaceae	g__Pseudomonas	s__Pseudomonas sp. LG1D9
ASV002420	A809583	0.004	9.8.2020	2020	Breeding	Finland	Hanko	59.8283	22.9659	Male	Young	k__Bacteria	p__Proteobacteria	c__Gammaproteobacteria	o__Pseudomonadales	f__Pseudomonadaceae	g__Pseudomonas	s__
ASV002487	8_vantaa	0.004	2.9.2020	2020	Breeding	Finland	Lansinnatus	60.249	25.118	Male	Young	k__Bacteria	p__Proteobacteria	c__Gammaproteobacteria	o__Enterobacterales	f__Aeromonadaceae	g__Aeromonas	s__Aeromonas encheleia
ASV002572	1_vantaa	0.004	1.9.2020	2020	Breeding	Finland	Lansinnatus	60.249	25.118	Male	Young	k__Bacteria	p__Proteobacteria	c__Gammaproteobacteria	o__Pseudomonadales	f__Pseudomonadaceae	g__Pseudomonas	s__Pseudomonas rhizosphaerae
ASV002717	A810991	0.004	25.3.2021	2021	Spring	Finland	Hanko	59.8283	22.9659	Male	Adult	k__Bacteria	p__Campylobacterota	c__Campylobacteria	o__Campylobacterales	f__Campylobacteraceae	g__Campylobacter	s__Campylobacter jejuni
ASV003194	A810983	0.004	23.3.2021	2021	Spring	Finland	Hanko	59.8283	22.9659	Male	Adult	k__Bacteria	p__Campylobacterota	c__Campylobacteria	o__Campylobacterales	f__Campylobacteraceae	g__Campylobacter	s__Campylobacter jejuni
ASV003313	16_denmark	0.004	22.9.2020	2020	Autumn	Denmark	Bagenkop	54.728	Oct.52	Male	Young	k__Bacteria	p__Proteobacteria	c__Gammaproteobacteria	o__Enterobacterales	f__Enterobacteriaceae	g__Escherichia-Shigella	s__Escherichia albertii
ASV003538	D15	0.004	18.5.2021	2021	Breeding	France	Chize forest	46.1319	0.4387	Male	Unknown	k__Bacteria	p__Firmicutes	c__Clostridia	o__Clostridiales	f__Clostridiaceae	g__Clostridium sensu stricto 1	s__Clostridium sp. Marseille-P2414
ASV003559	A810991	0.004	25.3.2021	2021	Spring	Finland	Hanko	59.8283	22.9659	Male	Adult	k__Bacteria	p__Campylobacterota	c__Campylobacteria	o__Campylobacterales	f__Campylobacteraceae	g__Campylobacter	s__Campylobacter jejuni
ASV003617	A810982	0.004	22.3.2021	2021	Spring	Finland	Hanko	59.8283	22.9659	Male	Adult	k__Bacteria	p__Proteobacteria	c__Gammaproteobacteria	o__Enterobacterales	f__Enterobacteriaceae	g__Escherichia-Shigella	s__Escherichia marmotae
ASV003727	LV30	0.004	25.9.2020	2020	Autumn	Latvia	Pape	56.1625	21.0656	Female	Young	k__Bacteria	p__Firmicutes	c__Bacilli	o__Staphylococcales	f__Staphylococcaceae	g__Staphylococcus	s__Staphylococcus saccharolyticus
ASV003862	16_denmark	0.004	22.9.2020	2020	Autumn	Denmark	Bagenkop	54.728	Oct.52	Male	Young	k__Bacteria	p__Proteobacteria	c__Gammaproteobacteria	o__Enterobacterales	f__Enterobacteriaceae	g__Escherichia-Shigella	s__Escherichia marmotae
ASV004104	D27	0.004	27.5.2021	2021	Breeding	France	Chize forest	46.0951	0.4133	Female	Unknown	k__Bacteria	p__Firmicutes	c__Clostridia	o__Clostridiales	f__Clostridiaceae	g__Clostridium sensu stricto 1	s__Clostridium sp. Marseille-P2414
ASV004116	13_vantaa	0.004	1.10.2020	2020	Autumn	Finland	Lansinnatus	60.249	25.118	Male	Adult	k__Bacteria	p__Proteobacteria	c__Gammaproteobacteria	o__Enterobacterales	f__Enterobacteriaceae	g__Escherichia-Shigella	s__Escherichia marmotae
ASV004376	A686067	0.004	31.5.2020	2020	Breeding	Finland	Karjaa	60.0715	23.662	Male	Adult	k__Bacteria	p__Proteobacteria	c__Gammaproteobacteria	o__Enterobacterales	f__Enterobacteriaceae	g__Escherichia-Shigella	s__Escherichia coli
ASV004393	12_vantaa	0.004	29.9.2020	2020	Autumn	Finland	Lansinnatus	60.249	25.118	Male	Adult	k__Bacteria	p__Actinobacteriota	c__Actinobacteria	o__Corynebacteriales	f__Corynebacteriaceae	g__Corynebacterium	s__
ASV004527	9_vantaa	0.004	14.9.2020	2020	Breeding	Finland	Lansinnatus	60.249	25.118	Female	Young	k__Bacteria	p__Proteobacteria	c__Gammaproteobacteria	o__Enterobacterales	f__Enterobacteriaceae	g__Escherichia-Shigella	s__Escherichia coli 55989
ASV004606	A686068	0.004	5.10.2020	2020	Autumn	Finland	Karjaa	60.0715	23.662	Male	Young	k__Bacteria	p__Firmicutes	c__Bacilli	o__Staphylococcales	f__Staphylococcaceae	g__Staphylococcus	s__Staphylococcus pasteuri
ASV004624	6_vantaa	0.004	2.9.2020	2020	Breeding	Finland	Lansinnatus	60.249	25.118	Male	Young	k__Bacteria	p__Firmicutes	c__Clostridia	o__Clostridiales	f__Clostridiaceae	g__Clostridium sensu stricto 2	s__Clostridium frigidicarnis
ASV004683	LV29	0.004	23.9.2020	2020	Autumn	Latvia	Pape	56.1625	21.0656	Female	Young	k__Bacteria	p__Proteobacteria	c__Gammaproteobacteria	o__Enterobacterales	f__Enterobacteriaceae	g__Escherichia-Shigella	s__Escherichia marmotae
ASV004689	D13	0.004	18.5.2021	2021	Breeding	France	Chize forest	46.1126	0.4495	Male	Unknown	k__Bacteria	p__Proteobacteria	c__Gammaproteobacteria	o__Enterobacterales	f__Yersiniaceae	g__Serratia	s__Rahnella sp. 'CDC 21234'
ASV004828	LV29	0.004	23.9.2020	2020	Autumn	Latvia	Pape	56.1625	21.0656	Female	Young	k__Bacteria	p__Proteobacteria	c__Gammaproteobacteria	o__Enterobacterales	f__Enterobacteriaceae	g__Escherichia-Shigella	s__Escherichia marmotae
ASV004863	5_vantaa	0.004	2.9.2020	2020	Breeding	Finland	Lansinnatus	60.249	25.118	Female	Young	k__Bacteria	p__Proteobacteria	c__Gammaproteobacteria	o__Pseudomonadales	f__Pseudomonadaceae	g__Pseudomonas	s__Pseudomonas sp. S09G 359
ASV005043	11_vantaa	0.004	14.9.2020	2020	Breeding	Finland	Lansinnatus	60.249	25.118	Male	Adult	k__Bacteria	p__Actinobacteriota	c__Actinobacteria	o__Corynebacteriales	f__Mycobacteriaceae	g__Mycobacterium	s__
ASV005445	5_vantaa	0.004	2.9.2020	2020	Breeding	Finland	Lansinnatus	60.249	25.118	Female	Young	k__Bacteria	p__Firmicutes	c__Bacilli	o__Bacillales	f__Bacillaceae	g__Bacillus	s__Bacillus sp. Y-01
ASV005631	7_vantaa	0.004	2.9.2020	2020	Breeding	Finland	Lansinnatus	60.249	25.118	Male	Young	k__Bacteria	p__Proteobacteria	c__Gammaproteobacteria	o__Pseudomonadales	f__Pseudomonadaceae	g__Pseudomonas	s__Pseudomonas migulae
ASV005747	A810920	0.004	12.8.2020	2020	Breeding	Finland	Hanko	59.8283	22.9659	Male	Young	k__Bacteria	p__Proteobacteria	c__Gammaproteobacteria	o__Enterobacterales	f__Enterobacteriaceae	g__Escherichia-Shigella	s__Escherichia coli
ASV005748	14_chize	0.004	31.5.2021	2021	Breeding	France	Chize forest	46.1523	0.437	Female	Unknown	k__Bacteria	p__Firmicutes	c__Bacilli	o__Mycoplasmatales	f__Mycoplasmataceae	g__Ureaplasma	s__
ASV006333	A686067	0.004	31.5.2020	2020	Breeding	Finland	Karjaa	60.0715	23.662	Male	Adult	k__Bacteria	p__Firmicutes	c__Clostridia	o__Clostridiales	f__Clostridiaceae	g__Clostridium sensu stricto 1	s__Clostridium perfringens
ASV006336	D28	0.004	31.5.2021	2021	Breeding	France	Chize forest	46.1201	0.4585	Male	Unknown	k__Bacteria	p__Firmicutes	c__Bacilli	o__Mycoplasmatales	f__Mycoplasmataceae	g__Mycoplasma	s__Malacoplasma microti
ASV006592	9_vantaa	0.004	14.9.2020	2020	Breeding	Finland	Lansinnatus	60.249	25.118	Female	Young	k__Bacteria	p__Proteobacteria	c__Gammaproteobacteria	o__Enterobacterales	f__Enterobacteriaceae	g__Escherichia-Shigella	s__Escherichia coli
ASV006648	16_denmark	0.004	22.9.2020	2020	Autumn	Denmark	Bagenkop	54.728	Oct.52	Male	Young	k__Bacteria	p__Proteobacteria	c__Gammaproteobacteria	o__Enterobacterales	f__Enterobacteriaceae	g__Escherichia-Shigella	s__Escherichia albertii
ASV006705	14_denmark	0.004	20.9.2020	2020	Autumn	Denmark	Hjulby	55.3422	Oct.66	Male	Young	k__Bacteria	p__Firmicutes	c__Bacilli	o__Bacillales	f__Bacillaceae	g__Bacillus	s__Bacillus longiquaesitum
ASV006862	6_denmark	0.004	21.7.2020	2020	Breeding	Denmark	Svendborg	55.0557	Oct.31	Unknown	Young	k__Bacteria	p__Firmicutes	c__Bacilli	o__Staphylococcales	f__Staphylococcaceae	g__Staphylococcus	s__Staphylococcus agnetis
ASV006922	15_denmark	0.004	20.9.2020	2020	Autumn	Denmark	Hjulby	55.3422	Oct.66	Male	Young	k__Bacteria	p__Firmicutes	c__Bacilli	o__Mycoplasmatales	f__Mycoplasmataceae	g__Ureaplasma	s__
ASV006938	16_denmark	0.004	22.9.2020	2020	Autumn	Denmark	Bagenkop	54.728	Oct.52	Male	Young	k__Bacteria	p__Proteobacteria	c__Gammaproteobacteria	o__Enterobacterales	f__Enterobacteriaceae	g__Escherichia-Shigella	s__Escherichia marmotae
ASV007225	LV29	0.004	23.9.2020	2020	Autumn	Latvia	Pape	56.1625	21.0656	Female	Young	k__Bacteria	p__Proteobacteria	c__Gammaproteobacteria	o__Enterobacterales	f__Enterobacteriaceae	g__Escherichia-Shigella	s__Escherichia marmotae
ASV007328	A686067	0.004	31.5.2020	2020	Breeding	Finland	Karjaa	60.0715	23.662	Male	Adult	k__Bacteria	p__Firmicutes	c__Clostridia	o__Clostridiales	f__Clostridiaceae	g__Clostridium sensu stricto 1	s__Clostridium perfringens NCTC 8239
ASV007417	A809585	0.004	11.8.2020	2020	Breeding	Finland	Hanko	59.8283	22.9659	Male	Young	k__Bacteria	p__Firmicutes	c__Bacilli	o__Staphylococcales	f__Staphylococcaceae	g__Staphylococcus	s__Staphylococcus epidermidis
ASV007575	14_denmark	0.004	20.9.2020	2020	Autumn	Denmark	Hjulby	55.3422	Oct.66	Male	Young	k__Bacteria	p__Firmicutes	c__Clostridia	o__Clostridiales	f__Clostridiaceae	g__Clostridium sensu stricto 1	s__
ASV007761	D2	0.004	12.5.2021	2021	Breeding	France	Chize forest	46.1269	0.4244	Male	Unknown	k__Bacteria	p__Firmicutes	c__Bacilli	o__Mycoplasmatales	f__Mycoplasmataceae	g__Mycoplasma	s__Mycoplasma moatsii ATCC 27625
ASV007992	16_denmark	0.004	22.9.2020	2020	Autumn	Denmark	Bagenkop	54.728	Oct.52	Male	Young	k__Bacteria	p__Proteobacteria	c__Gammaproteobacteria	o__Enterobacterales	f__Enterobacteriaceae	g__Escherichia-Shigella	s__Escherichia albertii
ASV008442	5_vantaa	0.004	2.9.2020	2020	Breeding	Finland	Lansinnatus	60.249	25.118	Female	Young	k__Bacteria	p__Actinobacteriota	c__Actinobacteria	o__Corynebacteriales	f__Mycobacteriaceae	g__Mycobacterium	s__
ASV008480	A810991	0.004	25.3.2021	2021	Spring	Finland	Hanko	59.8283	22.9659	Male	Adult	k__Bacteria	p__Campylobacterota	c__Campylobacteria	o__Campylobacterales	f__Campylobacteraceae	g__Campylobacter	s__Campylobacter sp. RM16704
ASV008492	14_denmark	0.004	20.9.2020	2020	Autumn	Denmark	Hjulby	55.3422	Oct.66	Male	Young	k__Bacteria	p__Firmicutes	c__Bacilli	o__Bacillales	f__Bacillaceae	g__Bacillus	s__Bacillus arbutinivorans
ASV008508	11_vantaa	0.004	14.9.2020	2020	Breeding	Finland	Lansinnatus	60.249	25.118	Male	Adult	k__Bacteria	p__Actinobacteriota	c__Actinobacteria	o__Corynebacteriales	f__Mycobacteriaceae	g__Mycobacterium	s__
ASV008580	19_vantaa	0.004	13.10.2020	2020	Autumn	Finland	Lansinnatus	60.249	25.118	Male	Adult	k__Bacteria	p__Proteobacteria	c__Gammaproteobacteria	o__Enterobacterales	f__Yersiniaceae	g__Yersinia	s__Yersinia kristensenii
ASV008647	12_denmark	0.004	16.8.2020	2020	Breeding	Denmark	Bagenkop	54.728	Oct.52	Unknown	Young	k__Bacteria	p__Firmicutes	c__Clostridia	o__Clostridiales	f__Clostridiaceae	g__Clostridium sensu stricto 1	s__Clostridium sp. Marseille-P2414
ASV008691	11_vantaa	0.004	14.9.2020	2020	Breeding	Finland	Lansinnatus	60.249	25.118	Male	Adult	k__Bacteria	p__Actinobacteriota	c__Actinobacteria	o__Corynebacteriales	f__Mycobacteriaceae	g__Mycobacterium	s__
ASV009451	12_denmark	0.004	16.8.2020	2020	Breeding	Denmark	Bagenkop	54.728	Oct.52	Unknown	Young	k__Bacteria	p__Firmicutes	c__Clostridia	o__Clostridiales	f__Clostridiaceae	g__Clostridium sensu stricto 1	s__Clostridium sp. Marseille-P2414
ASV009609	11_vantaa	0.004	14.9.2020	2020	Breeding	Finland	Lansinnatus	60.249	25.118	Male	Adult	k__Bacteria	p__Actinobacteriota	c__Actinobacteria	o__Corynebacteriales	f__Mycobacteriaceae	g__Mycobacterium	s__
ASV009750	LV02	0.004	21.8.2020	2020	Breeding	Latvia	Pape	56.1625	21.0656	Female	Young	k__Bacteria	p__Proteobacteria	c__Gammaproteobacteria	o__Enterobacterales	f__Enterobacteriaceae	g__Escherichia-Shigella	s__Escherichia albertii
ASV009887	7_vantaa	0.004	2.9.2020	2020	Breeding	Finland	Lansinnatus	60.249	25.118	Male	Young	k__Bacteria	p__Proteobacteria	c__Gammaproteobacteria	o__Enterobacterales	f__Enterobacteriaceae	g__Escherichia-Shigella	s__Escherichia coli
ASV010279	16_denmark	0.004	22.9.2020	2020	Autumn	Denmark	Bagenkop	54.728	Oct.52	Male	Young	k__Bacteria	p__Proteobacteria	c__Gammaproteobacteria	o__Enterobacterales	f__Enterobacteriaceae	g__Escherichia-Shigella	s__Escherichia marmotae
ASV012559	1_denmark	0.004	11.7.2020	2020	Breeding	Denmark	Svendborg	55.0557	Oct.31	Male	Adult	k__Bacteria	p__Firmicutes	c__Bacilli	o__Bacillales	f__Bacillaceae	g__Bacillus	s__
ASV012806	9_denmark	0.004	21.7.2020	2020	Breeding	Denmark	Svendborg	55.0557	Oct.31	Female	Adult	k__Bacteria	p__Firmicutes	c__Clostridia	o__Clostridiales	f__Clostridiaceae	g__Clostridium sensu stricto 9	s__
ASV013110	LV18	0.004	19.9.2020	2020	Autumn	Latvia	Pape	56.1625	21.0656	Female	Adult	k__Bacteria	p__Actinobacteriota	c__Actinobacteria	o__Corynebacteriales	f__Mycobacteriaceae	g__Mycobacterium	s__
ASV013186	9_denmark	0.004	21.7.2020	2020	Breeding	Denmark	Svendborg	55.0557	Oct.31	Female	Adult	k__Bacteria	p__Firmicutes	c__Clostridia	o__Clostridiales	f__Clostridiaceae	g__Clostridium sensu stricto 1	s__
ASV015273	9_denmark	0.004	21.7.2020	2020	Breeding	Denmark	Svendborg	55.0557	Oct.31	Female	Adult	k__Bacteria	p__Firmicutes	c__Bacilli	o__Bacillales	f__Bacillaceae	g__Bacillus	s__
ASV017811	11_vantaa	0.004	14.9.2020	2020	Breeding	Finland	Lansinnatus	60.249	25.118	Male	Adult	k__Bacteria	p__Actinobacteriota	c__Actinobacteria	o__Corynebacteriales	f__Mycobacteriaceae	g__Mycobacterium	s__
ASV142804	3_denmark	0.004	11.7.2020	2020	Breeding	Denmark	Svendborg	55.0557	Oct.31	Female	Adult	k__Bacteria	p__Firmicutes	c__Bacilli	o__Bacillales	f__Bacillaceae	g__Bacillus	s__
ASV169921	9_denmark	0.004	21.7.2020	2020	Breeding	Denmark	Svendborg	55.0557	Oct.31	Female	Adult	k__Bacteria	p__Firmicutes	c__Clostridia	o__Clostridiales	f__Clostridiaceae	g__Clostridium sensu stricto 1	s__
ASV393724	8A85324	0.004	30.7.2020	2020	Breeding	Denmark	Tinning Mose	56.266	9.957	Male	Adult	k__Bacteria	p__Proteobacteria	c__Gammaproteobacteria	o__Enterobacterales	f__Enterobacteriaceae	g__Escherichia-Shigella	s__
ASV000003	LV47	0.003	30.9.2020	2020	Autumn	Latvia	Pape	56.1625	21.0656	Female	Young	k__Bacteria	p__Campylobacterota	c__Campylobacteria	o__Campylobacterales	f__Campylobacteraceae	g__Campylobacter	s__Campylobacter jejuni subsp. jejuni LMG 23211
ASV000007	A811018	0.003	26.3.2021	2021	Spring	Finland	Hanko	59.8283	22.9659	Female	Adult	k__Bacteria	p__Proteobacteria	c__Gammaproteobacteria	o__Enterobacterales	f__Enterobacteriaceae	g__Escherichia-Shigella	s__Escherichia marmotae
ASV000007	14_denmark	0.003	20.9.2020	2020	Autumn	Denmark	Hjulby	55.3422	Oct.66	Male	Young	k__Bacteria	p__Proteobacteria	c__Gammaproteobacteria	o__Enterobacterales	f__Enterobacteriaceae	g__Escherichia-Shigella	s__Escherichia marmotae
ASV000016	A810920	0.003	12.8.2020	2020	Breeding	Finland	Hanko	59.8283	22.9659	Male	Young	k__Bacteria	p__Proteobacteria	c__Gammaproteobacteria	o__Enterobacterales	f__Enterobacteriaceae	g__Escherichia-Shigella	s__Escherichia coli
ASV000030	15_denmark	0.003	20.9.2020	2020	Autumn	Denmark	Hjulby	55.3422	Oct.66	Male	Young	k__Bacteria	p__Firmicutes	c__Bacilli	o__Mycoplasmatales	f__Mycoplasmataceae	g__Ureaplasma	s__
ASV000068	8A85324	0.003	30.7.2020	2020	Breeding	Denmark	Tinning Mose	56.266	9.957	Male	Adult	k__Bacteria	p__Firmicutes	c__Bacilli	o__Mycoplasmatales	f__Mycoplasmataceae	g__Mycoplasma	s__Mycoplasma penetrans HF-2
ASV000085	A686080	0.003	23.9.2020	2020	Autumn	Finland	Karjaa	60.0715	23.662	Male	Young	k__Bacteria	p__Proteobacteria	c__Gammaproteobacteria	o__Enterobacterales	f__Enterobacteriaceae	g__Escherichia-Shigella	s__Escherichia coli DSM 30083 = JCM 1649 = ATCC 11775
ASV000089	1_denmark	0.003	11.7.2020	2020	Breeding	Denmark	Svendborg	55.0557	Oct.31	Male	Adult	k__Bacteria	p__Firmicutes	c__Bacilli	o__Mycoplasmatales	f__Mycoplasmataceae	g__Mycoplasma	s__Mycoplasma penetrans HF-2
ASV000089	A686078	0.003	4.6.2020	2020	Breeding	Finland	Karjaa	60.0715	23.662	Male	Adult	k__Bacteria	p__Firmicutes	c__Bacilli	o__Mycoplasmatales	f__Mycoplasmataceae	g__Mycoplasma	s__Mycoplasma penetrans HF-2
ASV000089	8A85322	0.003	20.7.2020	2020	Breeding	Denmark	Tinning Mose	56.266	9.957	Female	Adult	k__Bacteria	p__Firmicutes	c__Bacilli	o__Mycoplasmatales	f__Mycoplasmataceae	g__Mycoplasma	s__Mycoplasma penetrans HF-2
ASV000099	A810920	0.003	12.8.2020	2020	Breeding	Finland	Hanko	59.8283	22.9659	Male	Young	k__Bacteria	p__Proteobacteria	c__Gammaproteobacteria	o__Enterobacterales	f__Enterobacteriaceae	g__Escherichia-Shigella	s__Escherichia albertii
ASV000129	A809583	0.003	9.8.2020	2020	Breeding	Finland	Hanko	59.8283	22.9659	Male	Young	k__Bacteria	p__Campylobacterota	c__Campylobacteria	o__Campylobacterales	f__Helicobacteraceae	g__Helicobacter	s__Helicobacter sp. 'B52D Seymour'
ASV000156	14_vantaa	0.003	1.10.2020	2020	Autumn	Finland	Lansinnatus	60.249	25.118	Male	Adult	k__Bacteria	p__Proteobacteria	c__Gammaproteobacteria	o__Pseudomonadales	f__Pseudomonadaceae	g__Pseudomonas	s__Pseudomonas yamanorum
ASV000168	A811018	0.003	26.3.2021	2021	Spring	Finland	Hanko	59.8283	22.9659	Female	Adult	k__Bacteria	p__Proteobacteria	c__Gammaproteobacteria	o__Enterobacterales	f__Enterobacteriaceae	g__Escherichia-Shigella	s__Escherichia coli
ASV000179	3_denmark	0.003	11.7.2020	2020	Breeding	Denmark	Svendborg	55.0557	Oct.31	Female	Adult	k__Bacteria	p__Campylobacterota	c__Campylobacteria	o__Campylobacterales	f__Campylobacteraceae	g__Campylobacter	s__Campylobacter jejuni subsp. jejuni LMG 23269
ASV000258	A810920	0.003	12.8.2020	2020	Breeding	Finland	Hanko	59.8283	22.9659	Male	Young	k__Bacteria	p__Firmicutes	c__Bacilli	o__Lactobacillales	f__Enterococcaceae	g__Enterococcus	s__Enterococcus faecalis ATCC 27275
ASV000474	A811018	0.003	26.3.2021	2021	Spring	Finland	Hanko	59.8283	22.9659	Female	Adult	k__Bacteria	p__Proteobacteria	c__Gammaproteobacteria	o__Enterobacterales	f__Enterobacteriaceae	g__Escherichia-Shigella	s__Escherichia coli
ASV000502	1_denmark	0.003	11.7.2020	2020	Breeding	Denmark	Svendborg	55.0557	Oct.31	Male	Adult	k__Bacteria	p__Proteobacteria	c__Gammaproteobacteria	o__Pseudomonadales	f__Pseudomonadaceae	g__Pseudomonas	s__Pseudomonas protegens
ASV000544	A686067	0.003	31.5.2020	2020	Breeding	Finland	Karjaa	60.0715	23.662	Male	Adult	k__Bacteria	p__Firmicutes	c__Bacilli	o__Mycoplasmatales	f__Mycoplasmataceae	g__Mycoplasma	s__Mycoplasma moatsii ATCC 27625
ASV000742	LV02	0.003	21.8.2020	2020	Breeding	Latvia	Pape	56.1625	21.0656	Female	Young	k__Bacteria	p__Proteobacteria	c__Gammaproteobacteria	o__Pseudomonadales	f__Pseudomonadaceae	g__Pseudomonas	s__Pseudomonas yamanorum
ASV000798	A686080	0.003	23.9.2020	2020	Autumn	Finland	Karjaa	60.0715	23.662	Male	Young	k__Bacteria	p__Firmicutes	c__Bacilli	o__Mycoplasmatales	f__Mycoplasmataceae	g__Mycoplasma	s__Mycoplasma moatsii ATCC 27625
ASV000810	11_denmark	0.003	1.8.2020	2020	Breeding	Denmark	Svendborg	55.0557	Oct.31	Male	Adult	k__Bacteria	p__Proteobacteria	c__Gammaproteobacteria	o__Pseudomonadales	f__Pseudomonadaceae	g__Pseudomonas	s__Pseudomonas lurida
ASV000854	A811018	0.003	26.3.2021	2021	Spring	Finland	Hanko	59.8283	22.9659	Female	Adult	k__Bacteria	p__Proteobacteria	c__Gammaproteobacteria	o__Enterobacterales	f__Enterobacteriaceae	g__Escherichia-Shigella	s__Escherichia coli
ASV001172	2_denmark	0.003	11.7.2020	2020	Breeding	Denmark	Svendborg	55.0557	Oct.31	Male	Adult	k__Bacteria	p__Proteobacteria	c__Gammaproteobacteria	o__Pseudomonadales	f__Pseudomonadaceae	g__Pseudomonas	s__Pseudomonas antarctica
ASV001482	LV02	0.003	21.8.2020	2020	Breeding	Latvia	Pape	56.1625	21.0656	Female	Young	k__Bacteria	p__Proteobacteria	c__Gammaproteobacteria	o__Enterobacterales	f__Enterobacteriaceae	g__Escherichia-Shigella	s__Escherichia coli
ASV001482	A811018	0.003	26.3.2021	2021	Spring	Finland	Hanko	59.8283	22.9659	Female	Adult	k__Bacteria	p__Proteobacteria	c__Gammaproteobacteria	o__Enterobacterales	f__Enterobacteriaceae	g__Escherichia-Shigella	s__Escherichia coli
ASV001485	14_vantaa	0.003	1.10.2020	2020	Autumn	Finland	Lansinnatus	60.249	25.118	Male	Adult	k__Bacteria	p__Firmicutes	c__Bacilli	o__Staphylococcales	f__Staphylococcaceae	g__Staphylococcus	s__Staphylococcus warneri
ASV001701	5_vantaa	0.003	2.9.2020	2020	Breeding	Finland	Lansinnatus	60.249	25.118	Female	Young	k__Bacteria	p__Firmicutes	c__Bacilli	o__Bacillales	f__Bacillaceae	g__Bacillus	s__Bacillus mycoides DSM 2048
ASV001713	LV30	0.003	25.9.2020	2020	Autumn	Latvia	Pape	56.1625	21.0656	Female	Young	k__Bacteria	p__Firmicutes	c__Bacilli	o__Staphylococcales	f__Staphylococcaceae	g__Staphylococcus	s__Staphylococcus capitis
ASV001813	11_denmark	0.003	1.8.2020	2020	Breeding	Denmark	Svendborg	55.0557	Oct.31	Male	Adult	k__Bacteria	p__Firmicutes	c__Bacilli	o__Staphylococcales	f__Staphylococcaceae	g__Staphylococcus	s__Staphylococcus epidermidis
ASV001827	A686067	0.003	31.5.2020	2020	Breeding	Finland	Karjaa	60.0715	23.662	Male	Adult	k__Bacteria	p__Proteobacteria	c__Gammaproteobacteria	o__Pseudomonadales	f__Pseudomonadaceae	g__Pseudomonas	s__
ASV002079	A810987	0.003	24.3.2021	2021	Spring	Finland	Hanko	59.8283	22.9659	Male	Adult	k__Bacteria	p__Proteobacteria	c__Gammaproteobacteria	o__Enterobacterales	f__Enterobacteriaceae	g__Escherichia-Shigella	s__Escherichia albertii
ASV002082	14_chize	0.003	31.5.2021	2021	Breeding	France	Chize forest	46.1523	0.437	Female	Unknown	k__Bacteria	p__Proteobacteria	c__Gammaproteobacteria	o__Enterobacterales	f__Yersiniaceae	g__Serratia	s__Serratia fonticola
ASV002368	9_denmark	0.003	21.7.2020	2020	Breeding	Denmark	Svendborg	55.0557	Oct.31	Female	Adult	k__Bacteria	p__Proteobacteria	c__Gammaproteobacteria	o__Pseudomonadales	f__Pseudomonadaceae	g__Pseudomonas	s__Pseudomonas sp. LG1D9
ASV002665	11_vantaa	0.003	14.9.2020	2020	Breeding	Finland	Lansinnatus	60.249	25.118	Male	Adult	k__Bacteria	p__Actinobacteriota	c__Actinobacteria	o__Corynebacteriales	f__Mycobacteriaceae	g__Mycobacterium	s__
ASV002861	9_vantaa	0.003	14.9.2020	2020	Breeding	Finland	Lansinnatus	60.249	25.118	Female	Young	k__Bacteria	p__Proteobacteria	c__Gammaproteobacteria	o__Enterobacterales	f__Enterobacteriaceae	g__Escherichia-Shigella	s__Escherichia albertii
ASV002959	13_vantaa	0.003	1.10.2020	2020	Autumn	Finland	Lansinnatus	60.249	25.118	Male	Adult	k__Bacteria	p__Proteobacteria	c__Gammaproteobacteria	o__Enterobacterales	f__Enterobacteriaceae	g__Escherichia-Shigella	s__Escherichia marmotae
ASV003397	A809583	0.003	9.8.2020	2020	Breeding	Finland	Hanko	59.8283	22.9659	Male	Young	k__Bacteria	p__Proteobacteria	c__Gammaproteobacteria	o__Enterobacterales	f__Yersiniaceae	g__Serratia	s__Rahnella sp. 'CDC 21234'
ASV003433	11_vantaa	0.003	14.9.2020	2020	Breeding	Finland	Lansinnatus	60.249	25.118	Male	Adult	k__Bacteria	p__Actinobacteriota	c__Actinobacteria	o__Corynebacteriales	f__Mycobacteriaceae	g__Mycobacterium	s__
ASV003471	1_denmark	0.003	11.7.2020	2020	Breeding	Denmark	Svendborg	55.0557	Oct.31	Male	Adult	k__Bacteria	p__Proteobacteria	c__Gammaproteobacteria	o__Enterobacterales	f__Enterobacteriaceae	g__Escherichia-Shigella	s__Escherichia coli
ASV003476	LV02	0.003	21.8.2020	2020	Breeding	Latvia	Pape	56.1625	21.0656	Female	Young	k__Bacteria	p__Proteobacteria	c__Gammaproteobacteria	o__Enterobacterales	f__Enterobacteriaceae	g__Escherichia-Shigella	s__Escherichia coli
ASV003628	LV09	0.003	17.9.2020	2020	Autumn	Latvia	Pape	56.1625	21.0656	Male	Young	k__Bacteria	p__Campylobacterota	c__Campylobacteria	o__Campylobacterales	f__Helicobacteraceae	g__Helicobacter	s__Helicobacter anseris
ASV003679	8A85329	0.003	5.8.2020	2020	Breeding	Denmark	Tinning Mose	56.266	9.957	Male	Young	k__Bacteria	p__Proteobacteria	c__Gammaproteobacteria	o__Enterobacterales	f__Aeromonadaceae	g__Aeromonas	s__
ASV003776	LV29	0.003	23.9.2020	2020	Autumn	Latvia	Pape	56.1625	21.0656	Female	Young	k__Bacteria	p__Proteobacteria	c__Gammaproteobacteria	o__Enterobacterales	f__Enterobacteriaceae	g__Escherichia-Shigella	s__Escherichia marmotae
ASV003865	14_denmark	0.003	20.9.2020	2020	Autumn	Denmark	Hjulby	55.3422	Oct.66	Male	Young	k__Bacteria	p__Proteobacteria	c__Gammaproteobacteria	o__Enterobacterales	f__Enterobacteriaceae	g__Escherichia-Shigella	s__Escherichia coli
ASV003896	5_vantaa	0.003	2.9.2020	2020	Breeding	Finland	Lansinnatus	60.249	25.118	Female	Young	k__Bacteria	p__Actinobacteriota	c__Actinobacteria	o__Corynebacteriales	f__Mycobacteriaceae	g__Mycobacterium	s__
ASV003896	A686067	0.003	31.5.2020	2020	Breeding	Finland	Karjaa	60.0715	23.662	Male	Adult	k__Bacteria	p__Actinobacteriota	c__Actinobacteria	o__Corynebacteriales	f__Mycobacteriaceae	g__Mycobacterium	s__
ASV004122	LV29	0.003	23.9.2020	2020	Autumn	Latvia	Pape	56.1625	21.0656	Female	Young	k__Bacteria	p__Proteobacteria	c__Gammaproteobacteria	o__Enterobacterales	f__Enterobacteriaceae	g__Escherichia-Shigella	s__Escherichia marmotae
ASV004163	A810920	0.003	12.8.2020	2020	Breeding	Finland	Hanko	59.8283	22.9659	Male	Young	k__Bacteria	p__Proteobacteria	c__Gammaproteobacteria	o__Enterobacterales	f__Enterobacteriaceae	g__Escherichia-Shigella	s__Escherichia coli 55989
ASV004195	13_denmark	0.003	14.9.2020	2020	Breeding	Denmark	Bagenkop	54.728	Oct.52	Male	Young	k__Bacteria	p__Proteobacteria	c__Gammaproteobacteria	o__Pseudomonadales	f__Pseudomonadaceae	g__Pseudomonas	s__Pseudomonas lurida
ASV004211	A810992	0.003	25.3.2021	2021	Spring	Finland	Hanko	59.8283	22.9659	Female	Adult	k__Bacteria	p__Campylobacterota	c__Campylobacteria	o__Campylobacterales	f__Campylobacteraceae	g__Campylobacter	s__Campylobacter jejuni subsp. jejuni LMG 23211
ASV004298	1_vantaa	0.003	1.9.2020	2020	Breeding	Finland	Lansinnatus	60.249	25.118	Male	Young	k__Bacteria	p__Proteobacteria	c__Gammaproteobacteria	o__Pseudomonadales	f__Pseudomonadaceae	g__Pseudomonas	s__Pseudomonas sp. 02C 26
ASV004310	LV24	0.003	20.9.2020	2020	Autumn	Latvia	Pape	56.1625	21.0656	Male	Adult	k__Bacteria	p__Campylobacterota	c__Campylobacteria	o__Campylobacterales	f__Campylobacteraceae	g__Campylobacter	s__Campylobacter jejuni subsp. jejuni LMG 23211
ASV004576	10_chize	0.003	20.5.2021	2021	Breeding	France	Chize forest	46.1578	0.4308	Male	Unknown	k__Bacteria	p__Campylobacterota	c__Campylobacteria	o__Campylobacterales	f__Campylobacteraceae	g__Campylobacter	s__Campylobacter sp. RM16704
ASV004588	D28	0.003	31.5.2021	2021	Breeding	France	Chize forest	46.1201	0.4585	Male	Unknown	k__Bacteria	p__Firmicutes	c__Bacilli	o__Mycoplasmatales	f__Mycoplasmataceae	g__Mycoplasma	s__Malacoplasma microti
ASV004598	16_denmark	0.003	22.9.2020	2020	Autumn	Denmark	Bagenkop	54.728	Oct.52	Male	Young	k__Bacteria	p__Proteobacteria	c__Gammaproteobacteria	o__Enterobacterales	f__Enterobacteriaceae	g__Escherichia-Shigella	s__Escherichia marmotae
ASV004666	12_denmark	0.003	16.8.2020	2020	Breeding	Denmark	Bagenkop	54.728	Oct.52	Unknown	Young	k__Bacteria	p__Firmicutes	c__Clostridia	o__Clostridiales	f__Clostridiaceae	g__Clostridium sensu stricto 1	s__Clostridium sp. Marseille-P2414
ASV004720	A810992	0.003	25.3.2021	2021	Spring	Finland	Hanko	59.8283	22.9659	Female	Adult	k__Bacteria	p__Firmicutes	c__Clostridia	o__Clostridiales	f__Clostridiaceae	g__Clostridium sensu stricto 9	s__
ASV004728	LV02	0.003	21.8.2020	2020	Breeding	Latvia	Pape	56.1625	21.0656	Female	Young	k__Bacteria	p__Proteobacteria	c__Gammaproteobacteria	o__Enterobacterales	f__Enterobacteriaceae	g__Escherichia-Shigella	s__Escherichia albertii
ASV004752	8E13246	0.003	Unknown	2020	NA	Denmark	Tinning Mose	56.266	9.957	Female	Adult	k__Bacteria	p__Proteobacteria	c__Gammaproteobacteria	o__Enterobacterales	f__Enterobacteriaceae	g__Escherichia-Shigella	s__Escherichia marmotae
ASV004776	6_vantaa	0.003	2.9.2020	2020	Breeding	Finland	Lansinnatus	60.249	25.118	Male	Young	k__Bacteria	p__Proteobacteria	c__Gammaproteobacteria	o__Enterobacterales	f__Yersiniaceae	g__Serratia	s__
ASV004788	D26	0.003	20.5.2021	2021	Breeding	France	Chize forest	46.0979	0.4134	Female	Unknown	k__Bacteria	p__Firmicutes	c__Clostridia	o__Clostridiales	f__Clostridiaceae	g__Clostridium sensu stricto 1	s__Clostridium sp. Marseille-P2414
ASV004808	7_vantaa	0.003	2.9.2020	2020	Breeding	Finland	Lansinnatus	60.249	25.118	Male	Young	k__Bacteria	p__Proteobacteria	c__Gammaproteobacteria	o__Pseudomonadales	f__Pseudomonadaceae	g__Pseudomonas	s__Pseudomonas umsongensis
ASV004982	14_denmark	0.003	20.9.2020	2020	Autumn	Denmark	Hjulby	55.3422	Oct.66	Male	Young	k__Bacteria	p__Firmicutes	c__Clostridia	o__Clostridiales	f__Clostridiaceae	g__Clostridium sensu stricto 1	s__
ASV004991	A810992	0.003	25.3.2021	2021	Spring	Finland	Hanko	59.8283	22.9659	Female	Adult	k__Bacteria	p__Campylobacterota	c__Campylobacteria	o__Campylobacterales	f__Campylobacteraceae	g__Campylobacter	s__Campylobacter jejuni
ASV005041	9_chize	0.003	20.5.2021	2021	Breeding	France	Chize forest	46.1523	0.437	Male	Unknown	k__Bacteria	p__Proteobacteria	c__Gammaproteobacteria	o__Enterobacterales	f__Enterobacteriaceae	g__Escherichia-Shigella	s__Escherichia marmotae
ASV005214	6_chize	0.003	18.5.2021	2021	Breeding	France	Chize forest	46.1504	0.4242	Female	Unknown	k__Bacteria	p__Firmicutes	c__Clostridia	o__Clostridiales	f__Clostridiaceae	g__Clostridium sensu stricto 1	s__
ASV005286	LV29	0.003	23.9.2020	2020	Autumn	Latvia	Pape	56.1625	21.0656	Female	Young	k__Bacteria	p__Proteobacteria	c__Gammaproteobacteria	o__Enterobacterales	f__Enterobacteriaceae	g__Escherichia-Shigella	s__Escherichia marmotae
ASV005529	D28	0.003	31.5.2021	2021	Breeding	France	Chize forest	46.1201	0.4585	Male	Unknown	k__Bacteria	p__Firmicutes	c__Bacilli	o__Mycoplasmatales	f__Mycoplasmataceae	g__Mycoplasma	s__Malacoplasma microti
ASV005597	D2	0.003	12.5.2021	2021	Breeding	France	Chize forest	46.1269	0.4244	Male	Unknown	k__Bacteria	p__Firmicutes	c__Bacilli	o__Mycoplasmatales	f__Mycoplasmataceae	g__Ureaplasma	s__
ASV005699	A686067	0.003	31.5.2020	2020	Breeding	Finland	Karjaa	60.0715	23.662	Male	Adult	k__Bacteria	p__Firmicutes	c__Clostridia	o__Clostridiales	f__Clostridiaceae	g__Clostridium sensu stricto 1	s__
ASV005847	A810994	0.003	26.3.2021	2021	Spring	Finland	Hanko	59.8283	22.9659	Female	Adult	k__Bacteria	p__Proteobacteria	c__Gammaproteobacteria	o__Pseudomonadales	f__Pseudomonadaceae	g__Pseudomonas	s__Pseudomonas sp. R-41739
ASV005859	LV02	0.003	21.8.2020	2020	Breeding	Latvia	Pape	56.1625	21.0656	Female	Young	k__Bacteria	p__Proteobacteria	c__Gammaproteobacteria	o__Pseudomonadales	f__Moraxellaceae	g__Moraxella	s__Moraxella atlantae
ASV006001	16_denmark	0.003	22.9.2020	2020	Autumn	Denmark	Bagenkop	54.728	Oct.52	Male	Young	k__Bacteria	p__Proteobacteria	c__Gammaproteobacteria	o__Enterobacterales	f__Enterobacteriaceae	g__Escherichia-Shigella	s__Escherichia albertii
ASV006047	D28	0.003	31.5.2021	2021	Breeding	France	Chize forest	46.1201	0.4585	Male	Unknown	k__Bacteria	p__Firmicutes	c__Bacilli	o__Mycoplasmatales	f__Mycoplasmataceae	g__Mycoplasma	s__Malacoplasma microti
ASV006067	2_vantaa	0.003	2.9.2020	2020	Breeding	Finland	Lansinnatus	60.249	25.118	Male	Young	k__Bacteria	p__Proteobacteria	c__Gammaproteobacteria	o__Burkholderiales	f__Burkholderiaceae	g__Burkholderia-Caballeronia-Paraburkholderia	s__Burkholderia sp. OLGA172
ASV006164	LV02	0.003	21.8.2020	2020	Breeding	Latvia	Pape	56.1625	21.0656	Female	Young	k__Bacteria	p__Proteobacteria	c__Gammaproteobacteria	o__Enterobacterales	f__Enterobacteriaceae	g__Escherichia-Shigella	s__Escherichia coli
ASV006175	7_denmark	0.003	21.7.2020	2020	Breeding	Denmark	Svendborg	55.0557	Oct.31	Female	Adult	k__Bacteria	p__Proteobacteria	c__Gammaproteobacteria	o__Pseudomonadales	f__Pseudomonadaceae	g__Pseudomonas	s__Pseudomonas lundensis
ASV006208	6_vantaa	0.003	2.9.2020	2020	Breeding	Finland	Lansinnatus	60.249	25.118	Male	Young	k__Bacteria	p__Actinobacteriota	c__Actinobacteria	o__Corynebacteriales	f__Mycobacteriaceae	g__Mycobacterium	s__
ASV006277	5_vantaa	0.003	2.9.2020	2020	Breeding	Finland	Lansinnatus	60.249	25.118	Female	Young	k__Bacteria	p__Actinobacteriota	c__Actinobacteria	o__Corynebacteriales	f__Mycobacteriaceae	g__Mycobacterium	s__
ASV006321	A809582	0.003	9.8.2020	2020	Breeding	Finland	Hanko	59.8283	22.9659	Male	Young	k__Bacteria	p__Proteobacteria	c__Gammaproteobacteria	o__Enterobacterales	f__Enterobacteriaceae	g__Escherichia-Shigella	s__Escherichia marmotae
ASV006449	LV29	0.003	23.9.2020	2020	Autumn	Latvia	Pape	56.1625	21.0656	Female	Young	k__Bacteria	p__Firmicutes	c__Bacilli	o__Staphylococcales	f__Staphylococcaceae	g__Staphylococcus	s__Staphylococcus epidermidis
ASV006503	D28	0.003	31.5.2021	2021	Breeding	France	Chize forest	46.1201	0.4585	Male	Unknown	k__Bacteria	p__Firmicutes	c__Bacilli	o__Mycoplasmatales	f__Mycoplasmataceae	g__Mycoplasma	s__Malacoplasma microti
ASV006531	A810988	0.003	24.3.2021	2021	Spring	Finland	Hanko	59.8283	22.9659	Male	Adult	k__Bacteria	p__Firmicutes	c__Bacilli	o__Mycoplasmatales	f__Mycoplasmataceae	g__Ureaplasma	s__
ASV006642	14_vantaa	0.003	1.10.2020	2020	Autumn	Finland	Lansinnatus	60.249	25.118	Male	Adult	k__Bacteria	p__Campylobacterota	c__Campylobacteria	o__Campylobacterales	f__Campylobacteraceae	g__Campylobacter	s__Campylobacter jejuni subsp. jejuni LMG 23211
ASV006759	A811018	0.003	26.3.2021	2021	Spring	Finland	Hanko	59.8283	22.9659	Female	Adult	k__Bacteria	p__Proteobacteria	c__Gammaproteobacteria	o__Enterobacterales	f__Enterobacteriaceae	g__Escherichia-Shigella	s__Escherichia fergusonii ATCC 35469
ASV006853	1_denmark	0.003	11.7.2020	2020	Breeding	Denmark	Svendborg	55.0557	Oct.31	Male	Adult	k__Bacteria	p__Proteobacteria	c__Gammaproteobacteria	o__Enterobacterales	f__Enterobacteriaceae	g__Citrobacter	s__Citrobacter freundii
ASV006867	A686067	0.003	31.5.2020	2020	Breeding	Finland	Karjaa	60.0715	23.662	Male	Adult	k__Bacteria	p__Proteobacteria	c__Gammaproteobacteria	o__Enterobacterales	f__Yersiniaceae	g__Serratia	s__Serratia proteamaculans 568
ASV006874	11_vantaa	0.003	14.9.2020	2020	Breeding	Finland	Lansinnatus	60.249	25.118	Male	Adult	k__Bacteria	p__Proteobacteria	c__Gammaproteobacteria	o__Enterobacterales	f__Yersiniaceae	g__Serratia	s__Ewingella americana
ASV006995	A810982	0.003	22.3.2021	2021	Spring	Finland	Hanko	59.8283	22.9659	Male	Adult	k__Bacteria	p__Proteobacteria	c__Gammaproteobacteria	o__Enterobacterales	f__Enterobacteriaceae	g__Escherichia-Shigella	s__Escherichia marmotae
ASV006999	A810986	0.003	24.3.2021	2021	Spring	Finland	Hanko	59.8283	22.9659	Female	Adult	k__Bacteria	p__Proteobacteria	c__Gammaproteobacteria	o__Enterobacterales	f__Enterobacteriaceae	g__Escherichia-Shigella	s__Escherichia marmotae
ASV007028	6_chize	0.003	18.5.2021	2021	Breeding	France	Chize forest	46.1504	0.4242	Female	Unknown	k__Bacteria	p__Actinobacteriota	c__Actinobacteria	o__Corynebacteriales	f__Mycobacteriaceae	g__Mycobacterium	s__
ASV007031	14_vantaa	0.003	1.10.2020	2020	Autumn	Finland	Lansinnatus	60.249	25.118	Male	Adult	k__Bacteria	p__Actinobacteriota	c__Actinobacteria	o__Corynebacteriales	f__Mycobacteriaceae	g__Mycobacterium	s__
ASV007158	6_vantaa	0.003	2.9.2020	2020	Breeding	Finland	Lansinnatus	60.249	25.118	Male	Young	k__Bacteria	p__Proteobacteria	c__Gammaproteobacteria	o__Enterobacterales	f__Enterobacteriaceae	g__Escherichia-Shigella	s__Escherichia coli
ASV007215	15_denmark	0.003	20.9.2020	2020	Autumn	Denmark	Hjulby	55.3422	Oct.66	Male	Young	k__Bacteria	p__Campylobacterota	c__Campylobacteria	o__Campylobacterales	f__Campylobacteraceae	g__Campylobacter	s__Campylobacter jejuni subsp. jejuni LMG 23211
ASV007465	A810992	0.003	25.3.2021	2021	Spring	Finland	Hanko	59.8283	22.9659	Female	Adult	k__Bacteria	p__Campylobacterota	c__Campylobacteria	o__Campylobacterales	f__Campylobacteraceae	g__Campylobacter	s__Campylobacter jejuni
ASV007478	D26	0.003	20.5.2021	2021	Breeding	France	Chize forest	46.0979	0.4134	Female	Unknown	k__Bacteria	p__Firmicutes	c__Clostridia	o__Clostridiales	f__Clostridiaceae	g__Clostridium sensu stricto 1	s__Clostridium sp. Marseille-P2414
ASV007520	LV13	0.003	19.9.2020	2020	Autumn	Latvia	Pape	56.1625	21.0656	Female	Adult	k__Bacteria	p__Firmicutes	c__Clostridia	o__Clostridiales	f__Clostridiaceae	g__Clostridium sensu stricto 1	s__Clostridium botulinum
ASV007563	16_denmark	0.003	22.9.2020	2020	Autumn	Denmark	Bagenkop	54.728	Oct.52	Male	Young	k__Bacteria	p__Proteobacteria	c__Gammaproteobacteria	o__Enterobacterales	f__Enterobacteriaceae	g__Escherichia-Shigella	s__Escherichia marmotae
ASV007789	14_denmark	0.003	20.9.2020	2020	Autumn	Denmark	Hjulby	55.3422	Oct.66	Male	Young	k__Bacteria	p__Firmicutes	c__Bacilli	o__Bacillales	f__Bacillaceae	g__Bacillus	s__Bacillus longiquaesitum
ASV008004	13_vantaa	0.003	1.10.2020	2020	Autumn	Finland	Lansinnatus	60.249	25.118	Male	Adult	k__Bacteria	p__Actinobacteriota	c__Actinobacteria	o__Corynebacteriales	f__Nocardiaceae	g__Nocardia	s__
ASV008197	A686068	0.003	5.10.2020	2020	Autumn	Finland	Karjaa	60.0715	23.662	Male	Young	k__Bacteria	p__Proteobacteria	c__Gammaproteobacteria	o__Enterobacterales	f__Enterobacteriaceae	g__Escherichia-Shigella	s__Escherichia coli
ASV008603	8E13246	0.003	Unknown	2020	NA	Denmark	Tinning Mose	56.266	9.957	Female	Adult	k__Bacteria	p__Firmicutes	c__Clostridia	o__Clostridiales	f__Clostridiaceae	g__Clostridium sensu stricto 1	s__Clostridium sp. Marseille-P2414
ASV008668	6_denmark	0.003	21.7.2020	2020	Breeding	Denmark	Svendborg	55.0557	Oct.31	Unknown	Young	k__Bacteria	p__Firmicutes	c__Bacilli	o__Staphylococcales	f__Staphylococcaceae	g__Staphylococcus	s__Staphylococcus agnetis
ASV008673	5_vantaa	0.003	2.9.2020	2020	Breeding	Finland	Lansinnatus	60.249	25.118	Female	Young	k__Bacteria	p__Actinobacteriota	c__Actinobacteria	o__Corynebacteriales	f__Mycobacteriaceae	g__Mycobacterium	s__
ASV008866	1_denmark	0.003	11.7.2020	2020	Breeding	Denmark	Svendborg	55.0557	Oct.31	Male	Adult	k__Bacteria	p__Proteobacteria	c__Gammaproteobacteria	o__Enterobacterales	f__Enterobacteriaceae	g__Escherichia-Shigella	s__Escherichia coli
ASV008880	LV13	0.003	19.9.2020	2020	Autumn	Latvia	Pape	56.1625	21.0656	Female	Adult	k__Bacteria	p__Actinobacteriota	c__Actinobacteria	o__Corynebacteriales	f__Mycobacteriaceae	g__Mycobacterium	s__
ASV008925	6_vantaa	0.003	2.9.2020	2020	Breeding	Finland	Lansinnatus	60.249	25.118	Male	Young	k__Bacteria	p__Proteobacteria	c__Gammaproteobacteria	o__Pseudomonadales	f__Pseudomonadaceae	g__Pseudomonas	s__Pseudomonas sp. R-41739
ASV008972	8E13246	0.003	Unknown	2020	NA	Denmark	Tinning Mose	56.266	9.957	Female	Adult	k__Bacteria	p__Proteobacteria	c__Gammaproteobacteria	o__Enterobacterales	f__Enterobacteriaceae	g__Escherichia-Shigella	s__Escherichia marmotae
ASV009042	A809583	0.003	9.8.2020	2020	Breeding	Finland	Hanko	59.8283	22.9659	Male	Young	k__Bacteria	p__Proteobacteria	c__Gammaproteobacteria	o__Enterobacterales	f__Yersiniaceae	g__Serratia	s__Rahnella sp. 'CDC 21234'
ASV009276	14_denmark	0.003	20.9.2020	2020	Autumn	Denmark	Hjulby	55.3422	Oct.66	Male	Young	k__Bacteria	p__Firmicutes	c__Bacilli	o__Bacillales	f__Bacillaceae	g__Bacillus	s__Bacillus longiquaesitum
ASV009315	LV31	0.003	26.9.2020	2020	Autumn	Latvia	Pape	56.1625	21.0656	Male	Young	k__Bacteria	p__Proteobacteria	c__Gammaproteobacteria	o__Enterobacterales	f__Enterobacteriaceae	g__Escherichia-Shigella	s__Escherichia coli
ASV009357	LV24	0.003	20.9.2020	2020	Autumn	Latvia	Pape	56.1625	21.0656	Male	Adult	k__Bacteria	p__Proteobacteria	c__Gammaproteobacteria	o__Pseudomonadales	f__Pseudomonadaceae	g__Pseudomonas	s__Pseudomonas sp. R-37908
ASV009384	LV02	0.003	21.8.2020	2020	Breeding	Latvia	Pape	56.1625	21.0656	Female	Young	k__Bacteria	p__Proteobacteria	c__Gammaproteobacteria	o__Enterobacterales	f__Enterobacteriaceae	g__Escherichia-Shigella	s__Escherichia coli
ASV009662	11_vantaa	0.003	14.9.2020	2020	Breeding	Finland	Lansinnatus	60.249	25.118	Male	Adult	k__Bacteria	p__Actinobacteriota	c__Actinobacteria	o__Corynebacteriales	f__Mycobacteriaceae	g__Mycobacterium	s__
ASV009791	7_vantaa	0.003	2.9.2020	2020	Breeding	Finland	Lansinnatus	60.249	25.118	Male	Young	k__Bacteria	p__Actinobacteriota	c__Actinobacteria	o__Corynebacteriales	f__Mycobacteriaceae	g__Mycobacterium	s__
ASV010386	LV36	0.003	28.9.2020	2020	Autumn	Latvia	Pape	56.1625	21.0656	Female	Young	k__Bacteria	p__Proteobacteria	c__Gammaproteobacteria	o__Enterobacterales	f__Enterobacteriaceae	g__Escherichia-Shigella	s__Escherichia coli
ASV010405	LV02	0.003	21.8.2020	2020	Breeding	Latvia	Pape	56.1625	21.0656	Female	Young	k__Bacteria	p__Proteobacteria	c__Gammaproteobacteria	o__Enterobacterales	f__Enterobacteriaceae	g__Escherichia-Shigella	s__Escherichia albertii
ASV011098	14_chize	0.003	31.5.2021	2021	Breeding	France	Chize forest	46.1523	0.437	Female	Unknown	k__Bacteria	p__Campylobacterota	c__Campylobacteria	o__Campylobacterales	f__Campylobacteraceae	g__Campylobacter	s__Campylobacter sp. RM16704
ASV011158	LV13	0.003	19.9.2020	2020	Autumn	Latvia	Pape	56.1625	21.0656	Female	Adult	k__Bacteria	p__Actinobacteriota	c__Actinobacteria	o__Corynebacteriales	f__Mycobacteriaceae	g__Mycobacterium	s__
ASV011333	A686078	0.003	4.6.2020	2020	Breeding	Finland	Karjaa	60.0715	23.662	Male	Adult	k__Bacteria	p__Proteobacteria	c__Gammaproteobacteria	o__Enterobacterales	f__Yersiniaceae	g__Serratia	s__Serratia sp. AS12
ASV011677	9_chize	0.003	20.5.2021	2021	Breeding	France	Chize forest	46.1523	0.437	Male	Unknown	k__Bacteria	p__Actinobacteriota	c__Actinobacteria	o__Corynebacteriales	f__Mycobacteriaceae	g__Mycobacterium	s__
ASV011684	LV18	0.003	19.9.2020	2020	Autumn	Latvia	Pape	56.1625	21.0656	Female	Adult	k__Bacteria	p__Firmicutes	c__Clostridia	o__Clostridiales	f__Clostridiaceae	g__Clostridium sensu stricto 1	s__
ASV011825	6_chize	0.003	18.5.2021	2021	Breeding	France	Chize forest	46.1504	0.4242	Female	Unknown	k__Bacteria	p__Actinobacteriota	c__Actinobacteria	o__Corynebacteriales	f__Mycobacteriaceae	g__Mycobacterium	s__
ASV011951	15_denmark	0.003	20.9.2020	2020	Autumn	Denmark	Hjulby	55.3422	Oct.66	Male	Young	k__Bacteria	p__Firmicutes	c__Bacilli	o__Mycoplasmatales	f__Mycoplasmataceae	g__Mycoplasma	s__Malacoplasma microti
ASV012010	14_vantaa	0.003	1.10.2020	2020	Autumn	Finland	Lansinnatus	60.249	25.118	Male	Adult	k__Bacteria	p__Proteobacteria	c__Gammaproteobacteria	o__Legionellales	f__Legionellaceae	g__Legionella	s__
ASV012176	7_vantaa	0.003	2.9.2020	2020	Breeding	Finland	Lansinnatus	60.249	25.118	Male	Young	k__Bacteria	p__Proteobacteria	c__Gammaproteobacteria	o__Pseudomonadales	f__Pseudomonadaceae	g__Pseudomonas	s__Pseudomonas sp. R-41739
ASV012404	LV18	0.003	19.9.2020	2020	Autumn	Latvia	Pape	56.1625	21.0656	Female	Adult	k__Bacteria	p__Proteobacteria	c__Gammaproteobacteria	o__Legionellales	f__Legionellaceae	g__Legionella	s__
ASV012451	LV18	0.003	19.9.2020	2020	Autumn	Latvia	Pape	56.1625	21.0656	Female	Adult	k__Bacteria	p__Proteobacteria	c__Gammaproteobacteria	o__Enterobacterales	f__Enterobacteriaceae	g__Citrobacter	s__Citrobacter werkmanii
ASV012481	9_denmark	0.003	21.7.2020	2020	Breeding	Denmark	Svendborg	55.0557	Oct.31	Female	Adult	k__Bacteria	p__Firmicutes	c__Clostridia	o__Clostridiales	f__Clostridiaceae	g__Clostridium sensu stricto 1	s__
ASV012866	1_denmark	0.003	11.7.2020	2020	Breeding	Denmark	Svendborg	55.0557	Oct.31	Male	Adult	k__Bacteria	p__Firmicutes	c__Bacilli	o__Bacillales	f__Bacillaceae	g__Bacillus	s__
ASV012996	A686068	0.003	5.10.2020	2020	Autumn	Finland	Karjaa	60.0715	23.662	Male	Young	k__Bacteria	p__Campylobacterota	c__Campylobacteria	o__Campylobacterales	f__Helicobacteraceae	g__Helicobacter	s__Helicobacter sp. 'B52D Seymour'
ASV013364	LV18	0.003	19.9.2020	2020	Autumn	Latvia	Pape	56.1625	21.0656	Female	Adult	k__Bacteria	p__Proteobacteria	c__Gammaproteobacteria	o__Enterobacterales	f__Enterobacteriaceae	g__Escherichia-Shigella	s__Escherichia marmotae
ASV014251	VD_01	0.003	27.7.2020	2020	Breeding	Denmark	Tinning Mose	56.266	9.957	Female	Young	k__Bacteria	p__Firmicutes	c__Clostridia	o__Clostridiales	f__Clostridiaceae	g__Clostridium sensu stricto 1	s__Clostridium sp. Marseille-P2414
ASV014347	7_vantaa	0.003	2.9.2020	2020	Breeding	Finland	Lansinnatus	60.249	25.118	Male	Young	k__Bacteria	p__Actinobacteriota	c__Actinobacteria	o__Corynebacteriales	f__Mycobacteriaceae	g__Mycobacterium	s__
ASV014950	9_denmark	0.003	21.7.2020	2020	Breeding	Denmark	Svendborg	55.0557	Oct.31	Female	Adult	k__Bacteria	p__Firmicutes	c__Clostridia	o__Clostridiales	f__Clostridiaceae	g__Clostridium sensu stricto 1	s__
ASV015034	11_vantaa	0.003	14.9.2020	2020	Breeding	Finland	Lansinnatus	60.249	25.118	Male	Adult	k__Bacteria	p__Actinobacteriota	c__Actinobacteria	o__Corynebacteriales	f__Mycobacteriaceae	g__Mycobacterium	s__
ASV015079	7_vantaa	0.003	2.9.2020	2020	Breeding	Finland	Lansinnatus	60.249	25.118	Male	Young	k__Bacteria	p__Proteobacteria	c__Gammaproteobacteria	o__Pseudomonadales	f__Pseudomonadaceae	g__Pseudomonas	s__Pseudomonas migulae
ASV017738	D27	0.003	27.5.2021	2021	Breeding	France	Chize forest	46.0951	0.4133	Female	Unknown	k__Bacteria	p__Firmicutes	c__Clostridia	o__Clostridiales	f__Clostridiaceae	g__Clostridium sensu stricto 1	s__Clostridium sp. Marseille-P2414
ASV017994	VD_01	0.003	27.7.2020	2020	Breeding	Denmark	Tinning Mose	56.266	9.957	Female	Young	k__Bacteria	p__Firmicutes	c__Clostridia	o__Clostridiales	f__Clostridiaceae	g__Clostridium sensu stricto 1	s__Clostridium sp. Marseille-P2414
ASV019112	11_denmark	0.003	1.8.2020	2020	Breeding	Denmark	Svendborg	55.0557	Oct.31	Male	Adult	k__Bacteria	p__Proteobacteria	c__Gammaproteobacteria	o__Pseudomonadales	f__Pseudomonadaceae	g__Pseudomonas	s__Pseudomonas versuta
ASV019538	10_chize	0.003	20.5.2021	2021	Breeding	France	Chize forest	46.1578	0.4308	Male	Unknown	k__Bacteria	p__Firmicutes	c__Bacilli	o__Mycoplasmatales	f__Mycoplasmataceae	g__Ureaplasma	s__
ASV021040	9_denmark	0.003	21.7.2020	2020	Breeding	Denmark	Svendborg	55.0557	Oct.31	Female	Adult	k__Bacteria	p__Proteobacteria	c__Gammaproteobacteria	o__Pseudomonadales	f__Pseudomonadaceae	g__Pseudomonas	s__Pseudomonas psychrophila
ASV021204	7_denmark	0.003	21.7.2020	2020	Breeding	Denmark	Svendborg	55.0557	Oct.31	Female	Adult	k__Bacteria	p__Firmicutes	c__Clostridia	o__Clostridiales	f__Clostridiaceae	g__Clostridium sensu stricto 5	s__Clostridium bovipellis
ASV040092	9_denmark	0.003	21.7.2020	2020	Breeding	Denmark	Svendborg	55.0557	Oct.31	Female	Adult	k__Bacteria	p__Firmicutes	c__Clostridia	o__Clostridiales	f__Clostridiaceae	g__Clostridium sensu stricto 1	s__
ASV050088	8_chize	0.003	18.5.2021	2021	Breeding	France	Chize forest	46.1504	0.4242	Male	Unknown	k__Bacteria	p__Campylobacterota	c__Campylobacteria	o__Campylobacterales	f__Campylobacteraceae	g__Campylobacter	s__Campylobacter jejuni subsp. jejuni LMG 23211
ASV050341	1_vantaa	0.003	1.9.2020	2020	Breeding	Finland	Lansinnatus	60.249	25.118	Male	Young	k__Bacteria	p__Firmicutes	c__Clostridia	o__Clostridiales	f__Clostridiaceae	g__Clostridium sensu stricto 13	s__
ASV054952	8_denmark	0.003	21.7.2020	2020	Breeding	Denmark	Svendborg	55.0557	Oct.31	Male	Young	k__Bacteria	p__Proteobacteria	c__Gammaproteobacteria	o__Pseudomonadales	f__Pseudomonadaceae	g__Pseudomonas	s__Pseudomonas sp. bs2935
ASV069247	12_denmark	0.003	16.8.2020	2020	Breeding	Denmark	Bagenkop	54.728	Oct.52	Unknown	Young	k__Bacteria	p__Proteobacteria	c__Gammaproteobacteria	o__Pseudomonadales	f__Pseudomonadaceae	g__Pseudomonas	s__Pseudomonas fluorescens
ASV069462	1_vantaa	0.003	1.9.2020	2020	Breeding	Finland	Lansinnatus	60.249	25.118	Male	Young	k__Bacteria	p__Proteobacteria	c__Gammaproteobacteria	o__Pseudomonadales	f__Pseudomonadaceae	g__Pseudomonas	s__Pseudomonas putida
ASV085707	3_denmark	0.003	11.7.2020	2020	Breeding	Denmark	Svendborg	55.0557	Oct.31	Female	Adult	k__Bacteria	p__Proteobacteria	c__Gammaproteobacteria	o__Enterobacterales	f__Enterobacteriaceae	g__Escherichia-Shigella	s__Escherichia marmotae
ASV087383	A686068	0.003	5.10.2020	2020	Autumn	Finland	Karjaa	60.0715	23.662	Male	Young	k__Bacteria	p__Campylobacterota	c__Campylobacteria	o__Campylobacterales	f__Campylobacteraceae	g__Campylobacter	s__Campylobacter jejuni subsp. jejuni LMG 23211
ASV091493	3_denmark	0.003	11.7.2020	2020	Breeding	Denmark	Svendborg	55.0557	Oct.31	Female	Adult	k__Bacteria	p__Actinobacteriota	c__Actinobacteria	o__Corynebacteriales	f__Mycobacteriaceae	g__Mycobacterium	s__
ASV094435	9_denmark	0.003	21.7.2020	2020	Breeding	Denmark	Svendborg	55.0557	Oct.31	Female	Adult	k__Bacteria	p__Firmicutes	c__Clostridia	o__Clostridiales	f__Clostridiaceae	g__Clostridium sensu stricto 1	s__
ASV097301	8_denmark	0.003	21.7.2020	2020	Breeding	Denmark	Svendborg	55.0557	Oct.31	Male	Young	k__Bacteria	p__Proteobacteria	c__Gammaproteobacteria	o__Pseudomonadales	f__Pseudomonadaceae	g__Pseudomonas	s__Pseudomonas fluorescens BS2
ASV101664	A810994	0.003	26.3.2021	2021	Spring	Finland	Hanko	59.8283	22.9659	Female	Adult	k__Bacteria	p__Proteobacteria	c__Gammaproteobacteria	o__Pseudomonadales	f__Pseudomonadaceae	g__Pseudomonas	s__Pseudomonas yamanorum
ASV157188	9_denmark	0.003	21.7.2020	2020	Breeding	Denmark	Svendborg	55.0557	Oct.31	Female	Adult	k__Bacteria	p__Firmicutes	c__Bacilli	o__Bacillales	f__Bacillaceae	g__Bacillus	s__Bacillus longiquaesitum
ASV157989	A810982	0.003	22.3.2021	2021	Spring	Finland	Hanko	59.8283	22.9659	Male	Adult	k__Bacteria	p__Proteobacteria	c__Gammaproteobacteria	o__Enterobacterales	f__Enterobacteriaceae	g__Escherichia-Shigella	s__Escherichia marmotae
ASV159337	A810991	0.003	25.3.2021	2021	Spring	Finland	Hanko	59.8283	22.9659	Male	Adult	k__Bacteria	p__Campylobacterota	c__Campylobacteria	o__Campylobacterales	f__Campylobacteraceae	g__Campylobacter	s__Campylobacter jejuni
ASV159602	8A85322	0.003	20.7.2020	2020	Breeding	Denmark	Tinning Mose	56.266	9.957	Female	Adult	k__Bacteria	p__Proteobacteria	c__Gammaproteobacteria	o__Enterobacterales	f__Enterobacteriaceae	g__Escherichia-Shigella	s__Escherichia marmotae
ASV161139	8A85329	0.003	5.8.2020	2020	Breeding	Denmark	Tinning Mose	56.266	9.957	Male	Young	k__Bacteria	p__Proteobacteria	c__Gammaproteobacteria	o__Pseudomonadales	f__Pseudomonadaceae	g__Pseudomonas	s__Pseudomonas sp. FDAARGOS_380
ASV204257	1_denmark	0.003	11.7.2020	2020	Breeding	Denmark	Svendborg	55.0557	Oct.31	Male	Adult	k__Bacteria	p__Proteobacteria	c__Gammaproteobacteria	o__Enterobacterales	f__Enterobacteriaceae	g__Escherichia-Shigella	s__Escherichia marmotae
ASV211725	3_denmark	0.003	11.7.2020	2020	Breeding	Denmark	Svendborg	55.0557	Oct.31	Female	Adult	k__Bacteria	p__Firmicutes	c__Bacilli	o__Lactobacillales	f__Streptococcaceae	g__Streptococcus	s__
ASV230888	1_vantaa	0.003	1.9.2020	2020	Breeding	Finland	Lansinnatus	60.249	25.118	Male	Young	k__Bacteria	p__Actinobacteriota	c__Actinobacteria	o__Corynebacteriales	f__Mycobacteriaceae	g__Mycobacterium	s__
ASV232004	1_vantaa	0.003	1.9.2020	2020	Breeding	Finland	Lansinnatus	60.249	25.118	Male	Young	k__Bacteria	p__Firmicutes	c__Clostridia	o__Clostridiales	f__Clostridiaceae	g__Clostridium sensu stricto 13	s__Clostridium estertheticum
ASV241623	LV45	0.003	30.9.2020	2020	Autumn	Latvia	Pape	56.1625	21.0656	Male	Young	k__Bacteria	p__Campylobacterota	c__Campylobacteria	o__Campylobacterales	f__Campylobacteraceae	g__Campylobacter	s__Campylobacter jejuni subsp. jejuni LMG 23269
ASV253844	13_denmark	0.003	14.9.2020	2020	Breeding	Denmark	Bagenkop	54.728	Oct.52	Male	Young	k__Bacteria	p__Proteobacteria	c__Gammaproteobacteria	o__Pseudomonadales	f__Pseudomonadaceae	g__Pseudomonas	s__Pseudomonas fluorescens LMG 5329
ASV277624	1_denmark	0.003	11.7.2020	2020	Breeding	Denmark	Svendborg	55.0557	Oct.31	Male	Adult	k__Bacteria	p__Proteobacteria	c__Gammaproteobacteria	o__Enterobacterales	f__Enterobacteriaceae	g__Escherichia-Shigella	s__Escherichia marmotae
ASV299382	LV45	0.003	30.9.2020	2020	Autumn	Latvia	Pape	56.1625	21.0656	Male	Young	k__Bacteria	p__Campylobacterota	c__Campylobacteria	o__Campylobacterales	f__Campylobacteraceae	g__Campylobacter	s__Campylobacter jejuni subsp. jejuni LMG 23269
ASV303576	19_vantaa	0.003	13.10.2020	2020	Autumn	Finland	Lansinnatus	60.249	25.118	Male	Adult	k__Bacteria	p__Proteobacteria	c__Gammaproteobacteria	o__Enterobacterales	f__Aeromonadaceae	g__Aeromonas	s__Aeromonas sp. CA23
ASV328495	LV18	0.003	19.9.2020	2020	Autumn	Latvia	Pape	56.1625	21.0656	Female	Adult	k__Bacteria	p__Proteobacteria	c__Gammaproteobacteria	o__Enterobacterales	f__Enterobacteriaceae	g__Escherichia-Shigella	s__Escherichia marmotae
ASV339530	13_denmark	0.003	14.9.2020	2020	Breeding	Denmark	Bagenkop	54.728	Oct.52	Male	Young	k__Bacteria	p__Proteobacteria	c__Gammaproteobacteria	o__Pseudomonadales	f__Pseudomonadaceae	g__Pseudomonas	s__Pseudomonas sp. FDAARGOS_380
ASV347100	3_denmark	0.003	11.7.2020	2020	Breeding	Denmark	Svendborg	55.0557	Oct.31	Female	Adult	k__Bacteria	p__Actinobacteriota	c__Actinobacteria	o__Corynebacteriales	f__Mycobacteriaceae	g__Mycobacterium	s__
ASV361941	2_vantaa	0.003	2.9.2020	2020	Breeding	Finland	Lansinnatus	60.249	25.118	Male	Young	k__Bacteria	p__Bacteroidota	c__Bacteroidia	o__Bacteroidales	f__Bacteroidaceae	g__Bacteroides	s__
ASV364370	9_denmark	0.003	21.7.2020	2020	Breeding	Denmark	Svendborg	55.0557	Oct.31	Female	Adult	k__Bacteria	p__Firmicutes	c__Clostridia	o__Clostridiales	f__Clostridiaceae	g__Clostridium sensu stricto 1	s__
ASV384500	A810986	0.003	24.3.2021	2021	Spring	Finland	Hanko	59.8283	22.9659	Female	Adult	k__Bacteria	p__Campylobacterota	c__Campylobacteria	o__Campylobacterales	f__Campylobacteraceae	g__Campylobacter	s__Campylobacter sp. RM16704
ASV397421	A810920	0.003	12.8.2020	2020	Breeding	Finland	Hanko	59.8283	22.9659	Male	Young	k__Bacteria	p__Proteobacteria	c__Gammaproteobacteria	o__Enterobacterales	f__Enterobacteriaceae	g__Escherichia-Shigella	s__Escherichia coli
ASV402946	1_vantaa	0.003	1.9.2020	2020	Breeding	Finland	Lansinnatus	60.249	25.118	Male	Young	k__Bacteria	p__Proteobacteria	c__Gammaproteobacteria	o__Pseudomonadales	f__Pseudomonadaceae	g__Pseudomonas	s__Pseudomonas sp. 02C 26
ASV407373	A810992	0.003	25.3.2021	2021	Spring	Finland	Hanko	59.8283	22.9659	Female	Adult	k__Bacteria	p__Campylobacterota	c__Campylobacteria	o__Campylobacterales	f__Campylobacteraceae	g__Campylobacter	s__Campylobacter jejuni
ASV417175	9_denmark	0.003	21.7.2020	2020	Breeding	Denmark	Svendborg	55.0557	Oct.31	Female	Adult	k__Bacteria	p__Firmicutes	c__Clostridia	o__Clostridiales	f__Clostridiaceae	g__Clostridium sensu stricto 1	s__
ASV430944	13_denmark	0.003	14.9.2020	2020	Breeding	Denmark	Bagenkop	54.728	Oct.52	Male	Young	k__Bacteria	p__Proteobacteria	c__Gammaproteobacteria	o__Pseudomonadales	f__Pseudomonadaceae	g__Pseudomonas	s__Pseudomonas yamanorum
ASV436340	LV45	0.003	30.9.2020	2020	Autumn	Latvia	Pape	56.1625	21.0656	Male	Young	k__Bacteria	p__Campylobacterota	c__Campylobacteria	o__Campylobacterales	f__Campylobacteraceae	g__Campylobacter	s__Campylobacter jejuni subsp. jejuni LMG 23357
ASV443725	8E13246	0.003	Unknown	2020	NA	Denmark	Tinning Mose	56.266	9.957	Female	Adult	k__Bacteria	p__Proteobacteria	c__Gammaproteobacteria	o__Enterobacterales	f__Enterobacteriaceae	g__Escherichia-Shigella	s__Escherichia marmotae
ASV000003	9_denmark	0.002	21.7.2020	2020	Breeding	Denmark	Svendborg	55.0557	Oct.31	Female	Adult	k__Bacteria	p__Campylobacterota	c__Campylobacteria	o__Campylobacterales	f__Campylobacteraceae	g__Campylobacter	s__Campylobacter jejuni subsp. jejuni LMG 23211
ASV000003	LV36	0.002	28.9.2020	2020	Autumn	Latvia	Pape	56.1625	21.0656	Female	Young	k__Bacteria	p__Campylobacterota	c__Campylobacteria	o__Campylobacterales	f__Campylobacteraceae	g__Campylobacter	s__Campylobacter jejuni subsp. jejuni LMG 23211
ASV000008	A810982	0.002	22.3.2021	2021	Spring	Finland	Hanko	59.8283	22.9659	Male	Adult	k__Bacteria	p__Campylobacterota	c__Campylobacteria	o__Campylobacterales	f__Campylobacteraceae	g__Campylobacter	s__Campylobacter sp. RM16704
ASV000017	A810920	0.002	12.8.2020	2020	Breeding	Finland	Hanko	59.8283	22.9659	Male	Young	k__Bacteria	p__Proteobacteria	c__Gammaproteobacteria	o__Enterobacterales	f__Enterobacteriaceae	g__Escherichia-Shigella	s__Escherichia marmotae
ASV000030	2_denmark	0.002	11.7.2020	2020	Breeding	Denmark	Svendborg	55.0557	Oct.31	Male	Adult	k__Bacteria	p__Firmicutes	c__Bacilli	o__Mycoplasmatales	f__Mycoplasmataceae	g__Ureaplasma	s__
ASV000106	A810920	0.002	12.8.2020	2020	Breeding	Finland	Hanko	59.8283	22.9659	Male	Young	k__Bacteria	p__Proteobacteria	c__Gammaproteobacteria	o__Enterobacterales	f__Enterobacteriaceae	g__Escherichia-Shigella	s__Escherichia coli
ASV000129	LV18	0.002	19.9.2020	2020	Autumn	Latvia	Pape	56.1625	21.0656	Female	Adult	k__Bacteria	p__Campylobacterota	c__Campylobacteria	o__Campylobacterales	f__Helicobacteraceae	g__Helicobacter	s__Helicobacter sp. 'B52D Seymour'
ASV000156	12_denmark	0.002	16.8.2020	2020	Breeding	Denmark	Bagenkop	54.728	Oct.52	Unknown	Young	k__Bacteria	p__Proteobacteria	c__Gammaproteobacteria	o__Pseudomonadales	f__Pseudomonadaceae	g__Pseudomonas	s__Pseudomonas yamanorum
ASV000156	LV47	0.002	30.9.2020	2020	Autumn	Latvia	Pape	56.1625	21.0656	Female	Young	k__Bacteria	p__Proteobacteria	c__Gammaproteobacteria	o__Pseudomonadales	f__Pseudomonadaceae	g__Pseudomonas	s__Pseudomonas yamanorum
ASV000156	LV24	0.002	20.9.2020	2020	Autumn	Latvia	Pape	56.1625	21.0656	Male	Adult	k__Bacteria	p__Proteobacteria	c__Gammaproteobacteria	o__Pseudomonadales	f__Pseudomonadaceae	g__Pseudomonas	s__Pseudomonas yamanorum
ASV000179	8_denmark	0.002	21.7.2020	2020	Breeding	Denmark	Svendborg	55.0557	Oct.31	Male	Young	k__Bacteria	p__Campylobacterota	c__Campylobacteria	o__Campylobacterales	f__Campylobacteraceae	g__Campylobacter	s__Campylobacter jejuni subsp. jejuni LMG 23269
ASV000184	12_denmark	0.002	16.8.2020	2020	Breeding	Denmark	Bagenkop	54.728	Oct.52	Unknown	Young	k__Bacteria	p__Proteobacteria	c__Gammaproteobacteria	o__Enterobacterales	f__Enterobacteriaceae	g__Escherichia-Shigella	s__Escherichia coli 55989
ASV000193	LV30	0.002	25.9.2020	2020	Autumn	Latvia	Pape	56.1625	21.0656	Female	Young	k__Bacteria	p__Proteobacteria	c__Gammaproteobacteria	o__Enterobacterales	f__Enterobacteriaceae	g__Escherichia-Shigella	s__Escherichia coli
ASV000194	A809585	0.002	11.8.2020	2020	Breeding	Finland	Hanko	59.8283	22.9659	Male	Young	k__Bacteria	p__Proteobacteria	c__Gammaproteobacteria	o__Enterobacterales	f__Yersiniaceae	g__Serratia	s__Rahnella sp. 'CDC 21234'
ASV000218	A686078	0.002	4.6.2020	2020	Breeding	Finland	Karjaa	60.0715	23.662	Male	Adult	k__Bacteria	p__Proteobacteria	c__Gammaproteobacteria	o__Enterobacterales	f__Yersiniaceae	g__Serratia	s__Serratia fonticola
ASV000258	A810982	0.002	22.3.2021	2021	Spring	Finland	Hanko	59.8283	22.9659	Male	Adult	k__Bacteria	p__Firmicutes	c__Bacilli	o__Lactobacillales	f__Enterococcaceae	g__Enterococcus	s__Enterococcus faecalis ATCC 27275
ASV000288	A810920	0.002	12.8.2020	2020	Breeding	Finland	Hanko	59.8283	22.9659	Male	Young	k__Bacteria	p__Proteobacteria	c__Gammaproteobacteria	o__Enterobacterales	f__Enterobacteriaceae	g__Escherichia-Shigella	s__Escherichia coli
ASV000408	15_denmark	0.002	20.9.2020	2020	Autumn	Denmark	Hjulby	55.3422	Oct.66	Male	Young	k__Bacteria	p__Proteobacteria	c__Gammaproteobacteria	o__Enterobacterales	f__Enterobacteriaceae	g__Escherichia-Shigella	s__Escherichia albertii
ASV000501	9_denmark	0.002	21.7.2020	2020	Breeding	Denmark	Svendborg	55.0557	Oct.31	Female	Adult	k__Bacteria	p__Firmicutes	c__Bacilli	o__Lactobacillales	f__Enterococcaceae	g__Enterococcus	s__Enterococcus moraviensis ATCC BAA-383
ASV000502	9_chize	0.002	20.5.2021	2021	Breeding	France	Chize forest	46.1523	0.437	Male	Unknown	k__Bacteria	p__Proteobacteria	c__Gammaproteobacteria	o__Pseudomonadales	f__Pseudomonadaceae	g__Pseudomonas	s__Pseudomonas protegens
ASV000573	VD_01	0.002	27.7.2020	2020	Breeding	Denmark	Tinning Mose	56.266	9.957	Female	Young	k__Bacteria	p__Firmicutes	c__Bacilli	o__Mycoplasmatales	f__Mycoplasmataceae	g__Mycoplasma	s__Mycoplasma moatsii ATCC 27625
ASV000683	2_denmark	0.002	11.7.2020	2020	Breeding	Denmark	Svendborg	55.0557	Oct.31	Male	Adult	k__Bacteria	p__Proteobacteria	c__Gammaproteobacteria	o__Pseudomonadales	f__Moraxellaceae	g__Acinetobacter	s__
ASV000683	12_denmark	0.002	16.8.2020	2020	Breeding	Denmark	Bagenkop	54.728	Oct.52	Unknown	Young	k__Bacteria	p__Proteobacteria	c__Gammaproteobacteria	o__Pseudomonadales	f__Moraxellaceae	g__Acinetobacter	s__
ASV000690	A810994	0.002	26.3.2021	2021	Spring	Finland	Hanko	59.8283	22.9659	Female	Adult	k__Bacteria	p__Campylobacterota	c__Campylobacteria	o__Campylobacterales	f__Campylobacteraceae	g__Campylobacter	s__Campylobacter jejuni subsp. jejuni LMG 23269
ASV000798	A686081	0.002	24.9.2020	2020	Autumn	Finland	Karjaa	60.0715	23.662	Male	Young	k__Bacteria	p__Firmicutes	c__Bacilli	o__Mycoplasmatales	f__Mycoplasmataceae	g__Mycoplasma	s__Mycoplasma moatsii ATCC 27625
ASV000854	A810920	0.002	12.8.2020	2020	Breeding	Finland	Hanko	59.8283	22.9659	Male	Young	k__Bacteria	p__Proteobacteria	c__Gammaproteobacteria	o__Enterobacterales	f__Enterobacteriaceae	g__Escherichia-Shigella	s__Escherichia coli
ASV001045	A809585	0.002	11.8.2020	2020	Breeding	Finland	Hanko	59.8283	22.9659	Male	Young	k__Bacteria	p__Proteobacteria	c__Gammaproteobacteria	o__Enterobacterales	f__Yersiniaceae	g__Serratia	s__Rahnella sp. 'CDC 21234'
ASV001301	D27	0.002	27.5.2021	2021	Breeding	France	Chize forest	46.0951	0.4133	Female	Unknown	k__Bacteria	p__Firmicutes	c__Clostridia	o__Clostridiales	f__Clostridiaceae	g__Clostridium sensu stricto 1	s__
ASV001482	A810920	0.002	12.8.2020	2020	Breeding	Finland	Hanko	59.8283	22.9659	Male	Young	k__Bacteria	p__Proteobacteria	c__Gammaproteobacteria	o__Enterobacterales	f__Enterobacteriaceae	g__Escherichia-Shigella	s__Escherichia coli
ASV001758	D15	0.002	18.5.2021	2021	Breeding	France	Chize forest	46.1319	0.4387	Male	Unknown	k__Bacteria	p__Firmicutes	c__Bacilli	o__Mycoplasmatales	f__Mycoplasmataceae	g__Ureaplasma	s__
ASV001758	A810988	0.002	24.3.2021	2021	Spring	Finland	Hanko	59.8283	22.9659	Male	Adult	k__Bacteria	p__Firmicutes	c__Bacilli	o__Mycoplasmatales	f__Mycoplasmataceae	g__Ureaplasma	s__
ASV001768	8_vantaa	0.002	2.9.2020	2020	Breeding	Finland	Lansinnatus	60.249	25.118	Male	Young	k__Bacteria	p__Proteobacteria	c__Gammaproteobacteria	o__Enterobacterales	f__Enterobacteriaceae	g__Escherichia-Shigella	s__Escherichia marmotae
ASV001885	A809583	0.002	9.8.2020	2020	Breeding	Finland	Hanko	59.8283	22.9659	Male	Young	k__Bacteria	p__Firmicutes	c__Bacilli	o__Mycoplasmatales	f__Mycoplasmataceae	g__Ureaplasma	s__
ASV001942	A811018	0.002	26.3.2021	2021	Spring	Finland	Hanko	59.8283	22.9659	Female	Adult	k__Bacteria	p__Campylobacterota	c__Campylobacteria	o__Campylobacterales	f__Campylobacteraceae	g__Campylobacter	s__Campylobacter jejuni subsp. jejuni LMG 23269
ASV002079	LV31	0.002	26.9.2020	2020	Autumn	Latvia	Pape	56.1625	21.0656	Male	Young	k__Bacteria	p__Proteobacteria	c__Gammaproteobacteria	o__Enterobacterales	f__Enterobacteriaceae	g__Escherichia-Shigella	s__Escherichia albertii
ASV002079	11_denmark	0.002	1.8.2020	2020	Breeding	Denmark	Svendborg	55.0557	Oct.31	Male	Adult	k__Bacteria	p__Proteobacteria	c__Gammaproteobacteria	o__Enterobacterales	f__Enterobacteriaceae	g__Escherichia-Shigella	s__Escherichia albertii
ASV002108	D27	0.002	27.5.2021	2021	Breeding	France	Chize forest	46.0951	0.4133	Female	Unknown	k__Bacteria	p__Proteobacteria	c__Gammaproteobacteria	o__Enterobacterales	f__Enterobacteriaceae	g__Escherichia-Shigella	s__Escherichia albertii
ASV002622	5_vantaa	0.002	2.9.2020	2020	Breeding	Finland	Lansinnatus	60.249	25.118	Female	Young	k__Bacteria	p__Actinobacteriota	c__Actinobacteria	o__Corynebacteriales	f__Mycobacteriaceae	g__Mycobacterium	s__
ASV003024	8A85322	0.002	20.7.2020	2020	Breeding	Denmark	Tinning Mose	56.266	9.957	Female	Adult	k__Bacteria	p__Campylobacterota	c__Campylobacteria	o__Campylobacterales	f__Campylobacteraceae	g__Campylobacter	s__Campylobacter jejuni subsp. jejuni LMG 23211
ASV003024	15_denmark	0.002	20.9.2020	2020	Autumn	Denmark	Hjulby	55.3422	Oct.66	Male	Young	k__Bacteria	p__Campylobacterota	c__Campylobacteria	o__Campylobacterales	f__Campylobacteraceae	g__Campylobacter	s__Campylobacter jejuni subsp. jejuni LMG 23211
ASV003151	LV02	0.002	21.8.2020	2020	Breeding	Latvia	Pape	56.1625	21.0656	Female	Young	k__Bacteria	p__Proteobacteria	c__Gammaproteobacteria	o__Enterobacterales	f__Enterobacteriaceae	g__Escherichia-Shigella	s__Escherichia albertii
ASV003160	LV13	0.002	19.9.2020	2020	Autumn	Latvia	Pape	56.1625	21.0656	Female	Adult	k__Bacteria	p__Actinobacteriota	c__Actinobacteria	o__Corynebacteriales	f__Mycobacteriaceae	g__Mycobacterium	s__
ASV003313	A811018	0.002	26.3.2021	2021	Spring	Finland	Hanko	59.8283	22.9659	Female	Adult	k__Bacteria	p__Proteobacteria	c__Gammaproteobacteria	o__Enterobacterales	f__Enterobacteriaceae	g__Escherichia-Shigella	s__Escherichia albertii
ASV003320	16_denmark	0.002	22.9.2020	2020	Autumn	Denmark	Bagenkop	54.728	Oct.52	Male	Young	k__Bacteria	p__Proteobacteria	c__Gammaproteobacteria	o__Enterobacterales	f__Enterobacteriaceae	g__Escherichia-Shigella	s__Escherichia albertii
ASV003471	16_denmark	0.002	22.9.2020	2020	Autumn	Denmark	Bagenkop	54.728	Oct.52	Male	Young	k__Bacteria	p__Proteobacteria	c__Gammaproteobacteria	o__Enterobacterales	f__Enterobacteriaceae	g__Escherichia-Shigella	s__Escherichia coli
ASV003535	A810988	0.002	24.3.2021	2021	Spring	Finland	Hanko	59.8283	22.9659	Male	Adult	k__Bacteria	p__Firmicutes	c__Bacilli	o__Mycoplasmatales	f__Mycoplasmataceae	g__Ureaplasma	s__
ASV003541	D13	0.002	18.5.2021	2021	Breeding	France	Chize forest	46.1126	0.4495	Male	Unknown	k__Bacteria	p__Actinobacteriota	c__Actinobacteria	o__Corynebacteriales	f__Corynebacteriaceae	g__Corynebacterium	s__
ASV003617	9_vantaa	0.002	14.9.2020	2020	Breeding	Finland	Lansinnatus	60.249	25.118	Female	Young	k__Bacteria	p__Proteobacteria	c__Gammaproteobacteria	o__Enterobacterales	f__Enterobacteriaceae	g__Escherichia-Shigella	s__Escherichia marmotae
ASV003747	14_vantaa	0.002	1.10.2020	2020	Autumn	Finland	Lansinnatus	60.249	25.118	Male	Adult	k__Bacteria	p__Campylobacterota	c__Campylobacteria	o__Campylobacterales	f__Campylobacteraceae	g__Campylobacter	s__Campylobacter jejuni subsp. jejuni LMG 23211
ASV003774	13_vantaa	0.002	1.10.2020	2020	Autumn	Finland	Lansinnatus	60.249	25.118	Male	Adult	k__Bacteria	p__Actinobacteriota	c__Actinobacteria	o__Corynebacteriales	f__Mycobacteriaceae	g__Mycobacterium	s__
ASV003782	13_vantaa	0.002	1.10.2020	2020	Autumn	Finland	Lansinnatus	60.249	25.118	Male	Adult	k__Bacteria	p__Proteobacteria	c__Gammaproteobacteria	o__Enterobacterales	f__Enterobacteriaceae	g__Escherichia-Shigella	s__Escherichia marmotae
ASV003782	A809582	0.002	9.8.2020	2020	Breeding	Finland	Hanko	59.8283	22.9659	Male	Young	k__Bacteria	p__Proteobacteria	c__Gammaproteobacteria	o__Enterobacterales	f__Enterobacteriaceae	g__Escherichia-Shigella	s__Escherichia marmotae
ASV003794	LV29	0.002	23.9.2020	2020	Autumn	Latvia	Pape	56.1625	21.0656	Female	Young	k__Bacteria	p__Proteobacteria	c__Gammaproteobacteria	o__Enterobacterales	f__Enterobacteriaceae	g__Escherichia-Shigella	s__Escherichia marmotae
ASV003951	6_vantaa	0.002	2.9.2020	2020	Breeding	Finland	Lansinnatus	60.249	25.118	Male	Young	k__Bacteria	p__Proteobacteria	c__Gammaproteobacteria	o__Enterobacterales	f__Yersiniaceae	g__Serratia	s__Rahnella sp. 'CDC 21234'
ASV003954	A810920	0.002	12.8.2020	2020	Breeding	Finland	Hanko	59.8283	22.9659	Male	Young	k__Bacteria	p__Proteobacteria	c__Gammaproteobacteria	o__Enterobacterales	f__Enterobacteriaceae	g__Escherichia-Shigella	s__Escherichia coli
ASV004014	A686083	0.002	25.9.2020	2020	Autumn	Finland	Karjaa	60.0715	23.662	Male	Young	k__Bacteria	p__Firmicutes	c__Bacilli	o__Lactobacillales	f__Enterococcaceae	g__Enterococcus	s__Enterococcus faecalis ATCC 27275
ASV004037	12_vantaa	0.002	29.9.2020	2020	Autumn	Finland	Lansinnatus	60.249	25.118	Male	Adult	k__Bacteria	p__Proteobacteria	c__Gammaproteobacteria	o__Pseudomonadales	f__Pseudomonadaceae	g__Pseudomonas	s__Pseudomonas sp. R-37908
ASV004087	8_chize	0.002	18.5.2021	2021	Breeding	France	Chize forest	46.1504	0.4242	Male	Unknown	k__Bacteria	p__Campylobacterota	c__Campylobacteria	o__Campylobacterales	f__Campylobacteraceae	g__Campylobacter	s__Campylobacter jejuni subsp. jejuni LMG 23211
ASV004096	A810920	0.002	12.8.2020	2020	Breeding	Finland	Hanko	59.8283	22.9659	Male	Young	k__Bacteria	p__Proteobacteria	c__Gammaproteobacteria	o__Enterobacterales	f__Enterobacteriaceae	g__Escherichia-Shigella	s__Escherichia coli
ASV004097	13_vantaa	0.002	1.10.2020	2020	Autumn	Finland	Lansinnatus	60.249	25.118	Male	Adult	k__Bacteria	p__Firmicutes	c__Bacilli	o__Lactobacillales	f__Streptococcaceae	g__Streptococcus	s__Streptococcus oralis ATCC 49296
ASV004258	9_denmark	0.002	21.7.2020	2020	Breeding	Denmark	Svendborg	55.0557	Oct.31	Female	Adult	k__Bacteria	p__Firmicutes	c__Clostridia	o__Clostridiales	f__Clostridiaceae	g__Clostridium sensu stricto 1	s__Clostridium perfringens
ASV004317	LV29	0.002	23.9.2020	2020	Autumn	Latvia	Pape	56.1625	21.0656	Female	Young	k__Bacteria	p__Proteobacteria	c__Gammaproteobacteria	o__Enterobacterales	f__Enterobacteriaceae	g__Escherichia-Shigella	s__Escherichia marmotae
ASV004324	A810986	0.002	24.3.2021	2021	Spring	Finland	Hanko	59.8283	22.9659	Female	Adult	k__Bacteria	p__Proteobacteria	c__Gammaproteobacteria	o__Enterobacterales	f__Enterobacteriaceae	g__Escherichia-Shigella	s__Escherichia marmotae
ASV004388	8A85329	0.002	5.8.2020	2020	Breeding	Denmark	Tinning Mose	56.266	9.957	Male	Young	k__Bacteria	p__Actinobacteriota	c__Actinobacteria	o__Corynebacteriales	f__Mycobacteriaceae	g__Mycobacterium	s__
ASV004401	A810920	0.002	12.8.2020	2020	Breeding	Finland	Hanko	59.8283	22.9659	Male	Young	k__Bacteria	p__Proteobacteria	c__Gammaproteobacteria	o__Enterobacterales	f__Enterobacteriaceae	g__Escherichia-Shigella	s__Escherichia coli
ASV004448	7_vantaa	0.002	2.9.2020	2020	Breeding	Finland	Lansinnatus	60.249	25.118	Male	Young	k__Bacteria	p__Proteobacteria	c__Gammaproteobacteria	o__Pseudomonadales	f__Pseudomonadaceae	g__Pseudomonas	s__Pseudomonas umsongensis
ASV004488	A810920	0.002	12.8.2020	2020	Breeding	Finland	Hanko	59.8283	22.9659	Male	Young	k__Bacteria	p__Proteobacteria	c__Gammaproteobacteria	o__Enterobacterales	f__Enterobacteriaceae	g__Escherichia-Shigella	s__Escherichia coli
ASV004504	A810920	0.002	12.8.2020	2020	Breeding	Finland	Hanko	59.8283	22.9659	Male	Young	k__Bacteria	p__Proteobacteria	c__Gammaproteobacteria	o__Enterobacterales	f__Enterobacteriaceae	g__Escherichia-Shigella	s__Escherichia coli 55989
ASV004607	A810920	0.002	12.8.2020	2020	Breeding	Finland	Hanko	59.8283	22.9659	Male	Young	k__Bacteria	p__Proteobacteria	c__Gammaproteobacteria	o__Enterobacterales	f__Enterobacteriaceae	g__Escherichia-Shigella	s__Escherichia coli
ASV004635	A810983	0.002	23.3.2021	2021	Spring	Finland	Hanko	59.8283	22.9659	Male	Adult	k__Bacteria	p__Campylobacterota	c__Campylobacteria	o__Campylobacterales	f__Campylobacteraceae	g__Campylobacter	s__Campylobacter jejuni
ASV004666	D27	0.002	27.5.2021	2021	Breeding	France	Chize forest	46.0951	0.4133	Female	Unknown	k__Bacteria	p__Firmicutes	c__Clostridia	o__Clostridiales	f__Clostridiaceae	g__Clostridium sensu stricto 1	s__Clostridium sp. Marseille-P2414
ASV004745	8A85324	0.002	30.7.2020	2020	Breeding	Denmark	Tinning Mose	56.266	9.957	Male	Adult	k__Bacteria	p__Firmicutes	c__Bacilli	o__Mycoplasmatales	f__Mycoplasmataceae	g__Ureaplasma	s__
ASV004750	A810986	0.002	24.3.2021	2021	Spring	Finland	Hanko	59.8283	22.9659	Female	Adult	k__Bacteria	p__Campylobacterota	c__Campylobacteria	o__Campylobacterales	f__Campylobacteraceae	g__Campylobacter	s__Campylobacter sp. RM16704
ASV005030	A810920	0.002	12.8.2020	2020	Breeding	Finland	Hanko	59.8283	22.9659	Male	Young	k__Bacteria	p__Proteobacteria	c__Gammaproteobacteria	o__Enterobacterales	f__Enterobacteriaceae	g__Escherichia-Shigella	s__Escherichia albertii
ASV005119	LV47	0.002	30.9.2020	2020	Autumn	Latvia	Pape	56.1625	21.0656	Female	Young	k__Bacteria	p__Campylobacterota	c__Campylobacteria	o__Campylobacterales	f__Helicobacteraceae	g__Helicobacter	s__Helicobacter anseris
ASV005259	LV29	0.002	23.9.2020	2020	Autumn	Latvia	Pape	56.1625	21.0656	Female	Young	k__Bacteria	p__Proteobacteria	c__Gammaproteobacteria	o__Enterobacterales	f__Enterobacteriaceae	g__Escherichia-Shigella	s__Escherichia marmotae
ASV005270	A810988	0.002	24.3.2021	2021	Spring	Finland	Hanko	59.8283	22.9659	Male	Adult	k__Bacteria	p__Firmicutes	c__Bacilli	o__Mycoplasmatales	f__Mycoplasmataceae	g__Ureaplasma	s__
ASV005333	9_denmark	0.002	21.7.2020	2020	Breeding	Denmark	Svendborg	55.0557	Oct.31	Female	Adult	k__Bacteria	p__Firmicutes	c__Clostridia	o__Clostridiales	f__Clostridiaceae	g__Clostridium sensu stricto 1	s__
ASV005380	LV18	0.002	19.9.2020	2020	Autumn	Latvia	Pape	56.1625	21.0656	Female	Adult	k__Bacteria	p__Firmicutes	c__Bacilli	o__Mycoplasmatales	f__Mycoplasmataceae	g__Ureaplasma	s__
ASV005535	5_vantaa	0.002	2.9.2020	2020	Breeding	Finland	Lansinnatus	60.249	25.118	Female	Young	k__Bacteria	p__Actinobacteriota	c__Actinobacteria	o__Corynebacteriales	f__Mycobacteriaceae	g__Mycobacterium	s__
ASV005549	15_denmark	0.002	20.9.2020	2020	Autumn	Denmark	Hjulby	55.3422	Oct.66	Male	Young	k__Bacteria	p__Campylobacterota	c__Campylobacteria	o__Campylobacterales	f__Campylobacteraceae	g__Campylobacter	s__Campylobacter jejuni subsp. jejuni LMG 23211
ASV005552	6_vantaa	0.002	2.9.2020	2020	Breeding	Finland	Lansinnatus	60.249	25.118	Male	Young	k__Bacteria	p__Firmicutes	c__Bacilli	o__Staphylococcales	f__Staphylococcaceae	g__Staphylococcus	s__Staphylococcus capitis
ASV005683	16_denmark	0.002	22.9.2020	2020	Autumn	Denmark	Bagenkop	54.728	Oct.52	Male	Young	k__Bacteria	p__Spirochaetota	c__Spirochaetia	o__Spirochaetales	f__Spirochaetaceae	g__Treponema	s__
ASV005685	14_chize	0.002	31.5.2021	2021	Breeding	France	Chize forest	46.1523	0.437	Female	Unknown	k__Bacteria	p__Firmicutes	c__Bacilli	o__Mycoplasmatales	f__Mycoplasmataceae	g__Ureaplasma	s__
ASV005728	6_chize	0.002	18.5.2021	2021	Breeding	France	Chize forest	46.1504	0.4242	Female	Unknown	k__Bacteria	p__Firmicutes	c__Clostridia	o__Clostridiales	f__Clostridiaceae	g__Clostridium sensu stricto 1	s__
ASV005742	5_vantaa	0.002	2.9.2020	2020	Breeding	Finland	Lansinnatus	60.249	25.118	Female	Young	k__Bacteria	p__Actinobacteriota	c__Actinobacteria	o__Corynebacteriales	f__Mycobacteriaceae	g__Mycobacterium	s__
ASV005750	9_vantaa	0.002	14.9.2020	2020	Breeding	Finland	Lansinnatus	60.249	25.118	Female	Young	k__Bacteria	p__Proteobacteria	c__Gammaproteobacteria	o__Enterobacterales	f__Enterobacteriaceae	g__Escherichia-Shigella	s__Escherichia coli
ASV005768	A810988	0.002	24.3.2021	2021	Spring	Finland	Hanko	59.8283	22.9659	Male	Adult	k__Bacteria	p__Firmicutes	c__Bacilli	o__Mycoplasmatales	f__Mycoplasmataceae	g__Ureaplasma	s__
ASV005785	A810987	0.002	24.3.2021	2021	Spring	Finland	Hanko	59.8283	22.9659	Male	Adult	k__Bacteria	p__Actinobacteriota	c__Actinobacteria	o__Corynebacteriales	f__Mycobacteriaceae	g__Mycobacterium	s__
ASV005798	13_denmark	0.002	14.9.2020	2020	Breeding	Denmark	Bagenkop	54.728	Oct.52	Male	Young	k__Bacteria	p__Proteobacteria	c__Gammaproteobacteria	o__Pseudomonadales	f__Pseudomonadaceae	g__Pseudomonas	s__Pseudomonas versuta
ASV005853	A810920	0.002	12.8.2020	2020	Breeding	Finland	Hanko	59.8283	22.9659	Male	Young	k__Bacteria	p__Proteobacteria	c__Gammaproteobacteria	o__Enterobacterales	f__Enterobacteriaceae	g__Escherichia-Shigella	s__Escherichia coli 55989
ASV005932	5_vantaa	0.002	2.9.2020	2020	Breeding	Finland	Lansinnatus	60.249	25.118	Female	Young	k__Bacteria	p__Proteobacteria	c__Gammaproteobacteria	o__Legionellales	f__Legionellaceae	g__Legionella	s__Legionella tunisiensis
ASV006059	LV29	0.002	23.9.2020	2020	Autumn	Latvia	Pape	56.1625	21.0656	Female	Young	k__Bacteria	p__Proteobacteria	c__Gammaproteobacteria	o__Enterobacterales	f__Enterobacteriaceae	g__Escherichia-Shigella	s__Escherichia coli 042
ASV006062	A810987	0.002	24.3.2021	2021	Spring	Finland	Hanko	59.8283	22.9659	Male	Adult	k__Bacteria	p__Actinobacteriota	c__Actinobacteria	o__Corynebacteriales	f__Mycobacteriaceae	g__Mycobacterium	s__
ASV006123	9_vantaa	0.002	14.9.2020	2020	Breeding	Finland	Lansinnatus	60.249	25.118	Female	Young	k__Bacteria	p__Proteobacteria	c__Gammaproteobacteria	o__Enterobacterales	f__Enterobacteriaceae	g__Escherichia-Shigella	s__Escherichia albertii
ASV006144	LV31	0.002	26.9.2020	2020	Autumn	Latvia	Pape	56.1625	21.0656	Male	Young	k__Bacteria	p__Proteobacteria	c__Gammaproteobacteria	o__Enterobacterales	f__Enterobacteriaceae	g__Escherichia-Shigella	s__Escherichia albertii
ASV006409	16_denmark	0.002	22.9.2020	2020	Autumn	Denmark	Bagenkop	54.728	Oct.52	Male	Young	k__Bacteria	p__Proteobacteria	c__Gammaproteobacteria	o__Enterobacterales	f__Enterobacteriaceae	g__Escherichia-Shigella	s__Escherichia albertii KF1
ASV006445	14_chize	0.002	31.5.2021	2021	Breeding	France	Chize forest	46.1523	0.437	Female	Unknown	k__Bacteria	p__Firmicutes	c__Clostridia	o__Clostridiales	f__Clostridiaceae	g__Clostridium sensu stricto 1	s__Clostridium sp. Marseille-P2414
ASV006467	LV30	0.002	25.9.2020	2020	Autumn	Latvia	Pape	56.1625	21.0656	Female	Young	k__Bacteria	p__Bacteroidota	c__Bacteroidia	o__Bacteroidales	f__Prevotellaceae	g__Prevotella	s__Prevotella intermedia
ASV006505	A686081	0.002	24.9.2020	2020	Autumn	Finland	Karjaa	60.0715	23.662	Male	Young	k__Bacteria	p__Campylobacterota	c__Campylobacteria	o__Campylobacterales	f__Campylobacteraceae	g__Campylobacter	s__Campylobacter jejuni subsp. jejuni LMG 23211
ASV006544	LV24	0.002	20.9.2020	2020	Autumn	Latvia	Pape	56.1625	21.0656	Male	Adult	k__Bacteria	p__Campylobacterota	c__Campylobacteria	o__Campylobacterales	f__Campylobacteraceae	g__Campylobacter	s__Campylobacter sp. RM16704
ASV006557	D27	0.002	27.5.2021	2021	Breeding	France	Chize forest	46.0951	0.4133	Female	Unknown	k__Bacteria	p__Firmicutes	c__Clostridia	o__Clostridiales	f__Clostridiaceae	g__Clostridium sensu stricto 1	s__Clostridium perfringens
ASV006593	A686081	0.002	24.9.2020	2020	Autumn	Finland	Karjaa	60.0715	23.662	Male	Young	k__Bacteria	p__Firmicutes	c__Bacilli	o__Lactobacillales	f__Enterococcaceae	g__Enterococcus	s__Enterococcus mundtii ATCC 882
ASV006620	5_vantaa	0.002	2.9.2020	2020	Breeding	Finland	Lansinnatus	60.249	25.118	Female	Young	k__Bacteria	p__Actinobacteriota	c__Actinobacteria	o__Corynebacteriales	f__Mycobacteriaceae	g__Mycobacterium	s__
ASV006647	A686081	0.002	24.9.2020	2020	Autumn	Finland	Karjaa	60.0715	23.662	Male	Young	k__Bacteria	p__Campylobacterota	c__Campylobacteria	o__Campylobacterales	f__Campylobacteraceae	g__Campylobacter	s__Campylobacter jejuni subsp. jejuni LMG 23211
ASV006698	14_vantaa	0.002	1.10.2020	2020	Autumn	Finland	Lansinnatus	60.249	25.118	Male	Adult	k__Bacteria	p__Campylobacterota	c__Campylobacteria	o__Campylobacterales	f__Campylobacteraceae	g__Campylobacter	s__Campylobacter jejuni subsp. jejuni LMG 23211
ASV006718	A810983	0.002	23.3.2021	2021	Spring	Finland	Hanko	59.8283	22.9659	Male	Adult	k__Bacteria	p__Campylobacterota	c__Campylobacteria	o__Campylobacterales	f__Campylobacteraceae	g__Campylobacter	s__Campylobacter jejuni
ASV006811	14_denmark	0.002	20.9.2020	2020	Autumn	Denmark	Hjulby	55.3422	Oct.66	Male	Young	k__Bacteria	p__Firmicutes	c__Bacilli	o__Bacillales	f__Bacillaceae	g__Bacillus	s__Bacillus longiquaesitum
ASV006915	A686083	0.002	25.9.2020	2020	Autumn	Finland	Karjaa	60.0715	23.662	Male	Young	k__Bacteria	p__Firmicutes	c__Bacilli	o__Bacillales	f__Bacillaceae	g__Bacillus	s__Bacillus horneckiae
ASV006965	14_denmark	0.002	20.9.2020	2020	Autumn	Denmark	Hjulby	55.3422	Oct.66	Male	Young	k__Bacteria	p__Firmicutes	c__Clostridia	o__Clostridiales	f__Clostridiaceae	g__Clostridium sensu stricto 1	s__
ASV006968	A810986	0.002	24.3.2021	2021	Spring	Finland	Hanko	59.8283	22.9659	Female	Adult	k__Bacteria	p__Proteobacteria	c__Gammaproteobacteria	o__Enterobacterales	f__Enterobacteriaceae	g__Escherichia-Shigella	s__Escherichia marmotae
ASV007089	A686083	0.002	25.9.2020	2020	Autumn	Finland	Karjaa	60.0715	23.662	Male	Young	k__Bacteria	p__Proteobacteria	c__Gammaproteobacteria	o__Enterobacterales	f__Yersiniaceae	g__Serratia	s__
ASV007108	7_vantaa	0.002	2.9.2020	2020	Breeding	Finland	Lansinnatus	60.249	25.118	Male	Young	k__Bacteria	p__Proteobacteria	c__Gammaproteobacteria	o__Pseudomonadales	f__Moraxellaceae	g__Acinetobacter	s__Acinetobacter johnsonii XBB1
ASV007176	A810992	0.002	25.3.2021	2021	Spring	Finland	Hanko	59.8283	22.9659	Female	Adult	k__Bacteria	p__Actinobacteriota	c__Actinobacteria	o__Corynebacteriales	f__Mycobacteriaceae	g__Mycobacterium	s__
ASV007268	A686083	0.002	25.9.2020	2020	Autumn	Finland	Karjaa	60.0715	23.662	Male	Young	k__Bacteria	p__Proteobacteria	c__Gammaproteobacteria	o__Legionellales	f__Legionellaceae	g__Legionella	s__
ASV007337	14_denmark	0.002	20.9.2020	2020	Autumn	Denmark	Hjulby	55.3422	Oct.66	Male	Young	k__Bacteria	p__Firmicutes	c__Clostridia	o__Clostridiales	f__Clostridiaceae	g__Clostridium sensu stricto 1	s__
ASV007466	A811018	0.002	26.3.2021	2021	Spring	Finland	Hanko	59.8283	22.9659	Female	Adult	k__Bacteria	p__Firmicutes	c__Clostridia	o__Clostridiales	f__Clostridiaceae	g__Clostridium sensu stricto 1	s__Clostridium perfringens
ASV007469	7_vantaa	0.002	2.9.2020	2020	Breeding	Finland	Lansinnatus	60.249	25.118	Male	Young	k__Bacteria	p__Proteobacteria	c__Gammaproteobacteria	o__Pseudomonadales	f__Pseudomonadaceae	g__Pseudomonas	s__Pseudomonas reinekei
ASV007495	13_denmark	0.002	14.9.2020	2020	Breeding	Denmark	Bagenkop	54.728	Oct.52	Male	Young	k__Bacteria	p__Proteobacteria	c__Gammaproteobacteria	o__Pseudomonadales	f__Pseudomonadaceae	g__Pseudomonas	s__Pseudomonas fluorescens
ASV007523	A686083	0.002	25.9.2020	2020	Autumn	Finland	Karjaa	60.0715	23.662	Male	Young	k__Bacteria	p__Actinobacteriota	c__Actinobacteria	o__Corynebacteriales	f__Mycobacteriaceae	g__Mycobacterium	s__
ASV007616	A810994	0.002	26.3.2021	2021	Spring	Finland	Hanko	59.8283	22.9659	Female	Adult	k__Bacteria	p__Firmicutes	c__Bacilli	o__Bacillales	f__Bacillaceae	g__Bacillus	s__Bacillus safensis
ASV007617	5_vantaa	0.002	2.9.2020	2020	Breeding	Finland	Lansinnatus	60.249	25.118	Female	Young	k__Bacteria	p__Actinobacteriota	c__Actinobacteria	o__Corynebacteriales	f__Mycobacteriaceae	g__Mycobacterium	s__
ASV007649	A809585	0.002	11.8.2020	2020	Breeding	Finland	Hanko	59.8283	22.9659	Male	Young	k__Bacteria	p__Proteobacteria	c__Gammaproteobacteria	o__Pseudomonadales	f__Pseudomonadaceae	g__Pseudomonas	s__Pseudomonas sp. R-41805
ASV007655	14_denmark	0.002	20.9.2020	2020	Autumn	Denmark	Hjulby	55.3422	Oct.66	Male	Young	k__Bacteria	p__Actinobacteriota	c__Actinobacteria	o__Corynebacteriales	f__Mycobacteriaceae	g__Mycobacterium	s__
ASV007715	A810992	0.002	25.3.2021	2021	Spring	Finland	Hanko	59.8283	22.9659	Female	Adult	k__Bacteria	p__Proteobacteria	c__Gammaproteobacteria	o__Pseudomonadales	f__Pseudomonadaceae	g__Pseudomonas	s__Pseudomonas fluorescens
ASV007723	1_denmark	0.002	11.7.2020	2020	Breeding	Denmark	Svendborg	55.0557	Oct.31	Male	Adult	k__Bacteria	p__Proteobacteria	c__Gammaproteobacteria	o__Enterobacterales	f__Enterobacteriaceae	g__Escherichia-Shigella	s__Escherichia marmotae
ASV007879	11_denmark	0.002	1.8.2020	2020	Breeding	Denmark	Svendborg	55.0557	Oct.31	Male	Adult	k__Bacteria	p__Proteobacteria	c__Gammaproteobacteria	o__Pseudomonadales	f__Pseudomonadaceae	g__Pseudomonas	s__
ASV007892	LV24	0.002	20.9.2020	2020	Autumn	Latvia	Pape	56.1625	21.0656	Male	Adult	k__Bacteria	p__Campylobacterota	c__Campylobacteria	o__Campylobacterales	f__Campylobacteraceae	g__Campylobacter	s__Campylobacter sp. RM16704
ASV007936	A810920	0.002	12.8.2020	2020	Breeding	Finland	Hanko	59.8283	22.9659	Male	Young	k__Bacteria	p__Proteobacteria	c__Gammaproteobacteria	o__Enterobacterales	f__Enterobacteriaceae	g__Escherichia-Shigella	s__Escherichia coli
ASV007993	LV02	0.002	21.8.2020	2020	Breeding	Latvia	Pape	56.1625	21.0656	Female	Young	k__Bacteria	p__Proteobacteria	c__Gammaproteobacteria	o__Enterobacterales	f__Enterobacteriaceae	g__Escherichia-Shigella	s__Escherichia albertii
ASV008057	A686083	0.002	25.9.2020	2020	Autumn	Finland	Karjaa	60.0715	23.662	Male	Young	k__Bacteria	p__Proteobacteria	c__Gammaproteobacteria	o__Enterobacterales	f__Yersiniaceae	g__Serratia	s__
ASV008152	14_denmark	0.002	20.9.2020	2020	Autumn	Denmark	Hjulby	55.3422	Oct.66	Male	Young	k__Bacteria	p__Firmicutes	c__Bacilli	o__Bacillales	f__Bacillaceae	g__Bacillus	s__
ASV008192	11_vantaa	0.002	14.9.2020	2020	Breeding	Finland	Lansinnatus	60.249	25.118	Male	Adult	k__Bacteria	p__Actinobacteriota	c__Actinobacteria	o__Corynebacteriales	f__Mycobacteriaceae	g__Mycobacterium	s__
ASV008208	14_denmark	0.002	20.9.2020	2020	Autumn	Denmark	Hjulby	55.3422	Oct.66	Male	Young	k__Bacteria	p__Firmicutes	c__Clostridia	o__Clostridiales	f__Clostridiaceae	g__Clostridium sensu stricto 1	s__Clostridium gasigenes
ASV008209	14_denmark	0.002	20.9.2020	2020	Autumn	Denmark	Hjulby	55.3422	Oct.66	Male	Young	k__Bacteria	p__Firmicutes	c__Clostridia	o__Clostridiales	f__Clostridiaceae	g__Clostridium sensu stricto 1	s__
ASV008308	A810989	0.002	24.3.2021	2021	Spring	Finland	Hanko	59.8283	22.9659	Male	Adult	k__Bacteria	p__Campylobacterota	c__Campylobacteria	o__Campylobacterales	f__Campylobacteraceae	g__Campylobacter	s__Campylobacter sp. RM16704
ASV008385	LV13	0.002	19.9.2020	2020	Autumn	Latvia	Pape	56.1625	21.0656	Female	Adult	k__Bacteria	p__Actinobacteriota	c__Actinobacteria	o__Corynebacteriales	f__Mycobacteriaceae	g__Mycobacterium	s__
ASV008465	LV02	0.002	21.8.2020	2020	Breeding	Latvia	Pape	56.1625	21.0656	Female	Young	k__Bacteria	p__Proteobacteria	c__Gammaproteobacteria	o__Enterobacterales	f__Enterobacteriaceae	g__Escherichia-Shigella	s__Escherichia coli
ASV008537	5_vantaa	0.002	2.9.2020	2020	Breeding	Finland	Lansinnatus	60.249	25.118	Female	Young	k__Bacteria	p__Proteobacteria	c__Gammaproteobacteria	o__Pseudomonadales	f__Pseudomonadaceae	g__Pseudomonas	s__Pseudomonas sp. S09G 359
ASV008707	15_denmark	0.002	20.9.2020	2020	Autumn	Denmark	Hjulby	55.3422	Oct.66	Male	Young	k__Bacteria	p__Proteobacteria	c__Gammaproteobacteria	o__Pseudomonadales	f__Pseudomonadaceae	g__Pseudomonas	s__Pseudomonas versuta
ASV008788	16_denmark	0.002	22.9.2020	2020	Autumn	Denmark	Bagenkop	54.728	Oct.52	Male	Young	k__Bacteria	p__Proteobacteria	c__Gammaproteobacteria	o__Enterobacterales	f__Enterobacteriaceae	g__Escherichia-Shigella	s__Escherichia albertii
ASV008843	A810920	0.002	12.8.2020	2020	Breeding	Finland	Hanko	59.8283	22.9659	Male	Young	k__Bacteria	p__Proteobacteria	c__Gammaproteobacteria	o__Enterobacterales	f__Enterobacteriaceae	g__Escherichia-Shigella	s__Escherichia coli
ASV008879	16_denmark	0.002	22.9.2020	2020	Autumn	Denmark	Bagenkop	54.728	Oct.52	Male	Young	k__Bacteria	p__Proteobacteria	c__Gammaproteobacteria	o__Enterobacterales	f__Enterobacteriaceae	g__Escherichia-Shigella	s__Escherichia albertii
ASV008898	8E13246	0.002	Unknown	2020	NA	Denmark	Tinning Mose	56.266	9.957	Female	Adult	k__Bacteria	p__Firmicutes	c__Clostridia	o__Clostridiales	f__Clostridiaceae	g__Clostridium sensu stricto 1	s__Clostridium sp. Marseille-P2414
ASV008975	D28	0.002	31.5.2021	2021	Breeding	France	Chize forest	46.1201	0.4585	Male	Unknown	k__Bacteria	p__Firmicutes	c__Bacilli	o__Mycoplasmatales	f__Mycoplasmataceae	g__Mycoplasma	s__Malacoplasma microti
ASV008978	A810986	0.002	24.3.2021	2021	Spring	Finland	Hanko	59.8283	22.9659	Female	Adult	k__Bacteria	p__Campylobacterota	c__Campylobacteria	o__Campylobacterales	f__Campylobacteraceae	g__Campylobacter	s__Campylobacter sp. RM16704
ASV009106	LV31	0.002	26.9.2020	2020	Autumn	Latvia	Pape	56.1625	21.0656	Male	Young	k__Bacteria	p__Proteobacteria	c__Gammaproteobacteria	o__Enterobacterales	f__Enterobacteriaceae	g__Escherichia-Shigella	s__Escherichia coli 55989
ASV009132	A810920	0.002	12.8.2020	2020	Breeding	Finland	Hanko	59.8283	22.9659	Male	Young	k__Bacteria	p__Proteobacteria	c__Gammaproteobacteria	o__Enterobacterales	f__Enterobacteriaceae	g__Escherichia-Shigella	s__Escherichia albertii
ASV009225	LV24	0.002	20.9.2020	2020	Autumn	Latvia	Pape	56.1625	21.0656	Male	Adult	k__Bacteria	p__Campylobacterota	c__Campylobacteria	o__Campylobacterales	f__Campylobacteraceae	g__Campylobacter	s__Campylobacter sp. RM16704
ASV009273	14_denmark	0.002	20.9.2020	2020	Autumn	Denmark	Hjulby	55.3422	Oct.66	Male	Young	k__Bacteria	p__Firmicutes	c__Bacilli	o__Bacillales	f__Bacillaceae	g__Bacillus	s__Bacillus arbutinivorans
ASV009306	LV29	0.002	23.9.2020	2020	Autumn	Latvia	Pape	56.1625	21.0656	Female	Young	k__Bacteria	p__Proteobacteria	c__Gammaproteobacteria	o__Enterobacterales	f__Enterobacteriaceae	g__Escherichia-Shigella	s__Escherichia marmotae
ASV009333	8_vantaa	0.002	2.9.2020	2020	Breeding	Finland	Lansinnatus	60.249	25.118	Male	Young	k__Bacteria	p__Proteobacteria	c__Gammaproteobacteria	o__Enterobacterales	f__Enterobacteriaceae	g__Escherichia-Shigella	s__Escherichia marmotae
ASV009344	11_vantaa	0.002	14.9.2020	2020	Breeding	Finland	Lansinnatus	60.249	25.118	Male	Adult	k__Bacteria	p__Actinobacteriota	c__Actinobacteria	o__Corynebacteriales	f__Mycobacteriaceae	g__Mycobacterium	s__
ASV009393	A810994	0.002	26.3.2021	2021	Spring	Finland	Hanko	59.8283	22.9659	Female	Adult	k__Bacteria	p__Proteobacteria	c__Gammaproteobacteria	o__Pseudomonadales	f__Moraxellaceae	g__Acinetobacter	s__Acinetobacter johnsonii XBB1
ASV009424	LV31	0.002	26.9.2020	2020	Autumn	Latvia	Pape	56.1625	21.0656	Male	Young	k__Bacteria	p__Proteobacteria	c__Gammaproteobacteria	o__Enterobacterales	f__Enterobacteriaceae	g__Escherichia-Shigella	s__Escherichia albertii
ASV009510	11_vantaa	0.002	14.9.2020	2020	Breeding	Finland	Lansinnatus	60.249	25.118	Male	Adult	k__Bacteria	p__Actinobacteriota	c__Actinobacteria	o__Corynebacteriales	f__Mycobacteriaceae	g__Mycobacterium	s__
ASV009550	9_vantaa	0.002	14.9.2020	2020	Breeding	Finland	Lansinnatus	60.249	25.118	Female	Young	k__Bacteria	p__Proteobacteria	c__Gammaproteobacteria	o__Enterobacterales	f__Enterobacteriaceae	g__Escherichia-Shigella	s__Escherichia marmotae
ASV009646	11_vantaa	0.002	14.9.2020	2020	Breeding	Finland	Lansinnatus	60.249	25.118	Male	Adult	k__Bacteria	p__Actinobacteriota	c__Actinobacteria	o__Corynebacteriales	f__Mycobacteriaceae	g__Mycobacterium	s__
ASV009850	A810987	0.002	24.3.2021	2021	Spring	Finland	Hanko	59.8283	22.9659	Male	Adult	k__Bacteria	p__Actinobacteriota	c__Actinobacteria	o__Corynebacteriales	f__Mycobacteriaceae	g__Mycobacterium	s__
ASV009872	2_vantaa	0.002	2.9.2020	2020	Breeding	Finland	Lansinnatus	60.249	25.118	Male	Young	k__Bacteria	p__Proteobacteria	c__Gammaproteobacteria	o__Enterobacterales	f__Enterobacteriaceae	g__Escherichia-Shigella	s__Escherichia coli
ASV009913	12_denmark	0.002	16.8.2020	2020	Breeding	Denmark	Bagenkop	54.728	Oct.52	Unknown	Young	k__Bacteria	p__Proteobacteria	c__Gammaproteobacteria	o__Pseudomonadales	f__Moraxellaceae	g__Acinetobacter	s__
ASV009922	11_vantaa	0.002	14.9.2020	2020	Breeding	Finland	Lansinnatus	60.249	25.118	Male	Adult	k__Bacteria	p__Actinobacteriota	c__Actinobacteria	o__Corynebacteriales	f__Mycobacteriaceae	g__Mycobacterium	s__
ASV009926	11_vantaa	0.002	14.9.2020	2020	Breeding	Finland	Lansinnatus	60.249	25.118	Male	Adult	k__Bacteria	p__Actinobacteriota	c__Actinobacteria	o__Corynebacteriales	f__Mycobacteriaceae	g__Mycobacterium	s__
ASV009951	A810986	0.002	24.3.2021	2021	Spring	Finland	Hanko	59.8283	22.9659	Female	Adult	k__Bacteria	p__Proteobacteria	c__Gammaproteobacteria	o__Enterobacterales	f__Enterobacteriaceae	g__Escherichia-Shigella	s__Escherichia marmotae
ASV009992	LV24	0.002	20.9.2020	2020	Autumn	Latvia	Pape	56.1625	21.0656	Male	Adult	k__Bacteria	p__Campylobacterota	c__Campylobacteria	o__Campylobacterales	f__Campylobacteraceae	g__Campylobacter	s__Campylobacter sp. RM16704
ASV010059	7_denmark	0.002	21.7.2020	2020	Breeding	Denmark	Svendborg	55.0557	Oct.31	Female	Adult	k__Bacteria	p__Firmicutes	c__Bacilli	o__Staphylococcales	f__Staphylococcaceae	g__Staphylococcus	s__Staphylococcus haemolyticus
ASV010181	10_chize	0.002	20.5.2021	2021	Breeding	France	Chize forest	46.1578	0.4308	Male	Unknown	k__Bacteria	p__Firmicutes	c__Bacilli	o__Mycoplasmatales	f__Mycoplasmataceae	g__Ureaplasma	s__
ASV010333	15_denmark	0.002	20.9.2020	2020	Autumn	Denmark	Hjulby	55.3422	Oct.66	Male	Young	k__Bacteria	p__Proteobacteria	c__Gammaproteobacteria	o__Enterobacterales	f__Enterobacteriaceae	g__Escherichia-Shigella	s__Escherichia coli
ASV010349	LV02	0.002	21.8.2020	2020	Breeding	Latvia	Pape	56.1625	21.0656	Female	Young	k__Bacteria	p__Proteobacteria	c__Gammaproteobacteria	o__Enterobacterales	f__Enterobacteriaceae	g__Escherichia-Shigella	s__Escherichia coli
ASV010564	5_vantaa	0.002	2.9.2020	2020	Breeding	Finland	Lansinnatus	60.249	25.118	Female	Young	k__Bacteria	p__Actinobacteriota	c__Actinobacteria	o__Corynebacteriales	f__Mycobacteriaceae	g__Mycobacterium	s__
ASV010691	11_vantaa	0.002	14.9.2020	2020	Breeding	Finland	Lansinnatus	60.249	25.118	Male	Adult	k__Bacteria	p__Proteobacteria	c__Gammaproteobacteria	o__Enterobacterales	f__Aeromonadaceae	g__Aeromonas	s__Aeromonas encheleia
ASV010733	11_vantaa	0.002	14.9.2020	2020	Breeding	Finland	Lansinnatus	60.249	25.118	Male	Adult	k__Bacteria	p__Proteobacteria	c__Gammaproteobacteria	o__Burkholderiales	f__Burkholderiaceae	g__Burkholderia-Caballeronia-Paraburkholderia	s__
ASV010745	14_denmark	0.002	20.9.2020	2020	Autumn	Denmark	Hjulby	55.3422	Oct.66	Male	Young	k__Bacteria	p__Firmicutes	c__Clostridia	o__Clostridiales	f__Clostridiaceae	g__Clostridium sensu stricto 1	s__
ASV010817	A810987	0.002	24.3.2021	2021	Spring	Finland	Hanko	59.8283	22.9659	Male	Adult	k__Bacteria	p__Campylobacterota	c__Campylobacteria	o__Campylobacterales	f__Campylobacteraceae	g__Campylobacter	s__Campylobacter jejuni
ASV010819	A810987	0.002	24.3.2021	2021	Spring	Finland	Hanko	59.8283	22.9659	Male	Adult	k__Bacteria	p__Actinobacteriota	c__Actinobacteria	o__Corynebacteriales	f__Mycobacteriaceae	g__Mycobacterium	s__
ASV010853	A686080	0.002	23.9.2020	2020	Autumn	Finland	Karjaa	60.0715	23.662	Male	Young	k__Bacteria	p__Firmicutes	c__Bacilli	o__Lactobacillales	f__Streptococcaceae	g__Streptococcus	s__Streptococcus sp. ChDC B345
ASV010996	11_denmark	0.002	1.8.2020	2020	Breeding	Denmark	Svendborg	55.0557	Oct.31	Male	Adult	k__Bacteria	p__Proteobacteria	c__Gammaproteobacteria	o__Pseudomonadales	f__Pseudomonadaceae	g__Pseudomonas	s__Pseudomonas sp. R-41805
ASV011008	14_denmark	0.002	20.9.2020	2020	Autumn	Denmark	Hjulby	55.3422	Oct.66	Male	Young	k__Bacteria	p__Firmicutes	c__Bacilli	o__Bacillales	f__Bacillaceae	g__Bacillus	s__Bacillus pseudomycoides
ASV011081	LV24	0.002	20.9.2020	2020	Autumn	Latvia	Pape	56.1625	21.0656	Male	Adult	k__Bacteria	p__Campylobacterota	c__Campylobacteria	o__Campylobacterales	f__Campylobacteraceae	g__Campylobacter	s__Campylobacter jejuni subsp. jejuni LMG 23211
ASV011226	14_denmark	0.002	20.9.2020	2020	Autumn	Denmark	Hjulby	55.3422	Oct.66	Male	Young	k__Bacteria	p__Firmicutes	c__Clostridia	o__Clostridiales	f__Clostridiaceae	g__Clostridium sensu stricto 1	s__Clostridium sp. Marseille-P2414
ASV011283	LV02	0.002	21.8.2020	2020	Breeding	Latvia	Pape	56.1625	21.0656	Female	Young	k__Bacteria	p__Proteobacteria	c__Gammaproteobacteria	o__Enterobacterales	f__Enterobacteriaceae	g__Escherichia-Shigella	s__Escherichia coli
ASV011330	14_denmark	0.002	20.9.2020	2020	Autumn	Denmark	Hjulby	55.3422	Oct.66	Male	Young	k__Bacteria	p__Firmicutes	c__Clostridia	o__Clostridiales	f__Clostridiaceae	g__Clostridium sensu stricto 13	s__
ASV011331	12_denmark	0.002	16.8.2020	2020	Breeding	Denmark	Bagenkop	54.728	Oct.52	Unknown	Young	k__Bacteria	p__Proteobacteria	c__Gammaproteobacteria	o__Enterobacterales	f__Aeromonadaceae	g__Aeromonas	s__Aeromonas encheleia
ASV011347	6_vantaa	0.002	2.9.2020	2020	Breeding	Finland	Lansinnatus	60.249	25.118	Male	Young	k__Bacteria	p__Actinobacteriota	c__Actinobacteria	o__Corynebacteriales	f__Mycobacteriaceae	g__Mycobacterium	s__
ASV011362	LV18	0.002	19.9.2020	2020	Autumn	Latvia	Pape	56.1625	21.0656	Female	Adult	k__Bacteria	p__Actinobacteriota	c__Actinobacteria	o__Corynebacteriales	f__Mycobacteriaceae	g__Mycobacterium	s__
ASV011510	LV24	0.002	20.9.2020	2020	Autumn	Latvia	Pape	56.1625	21.0656	Male	Adult	k__Bacteria	p__Campylobacterota	c__Campylobacteria	o__Campylobacterales	f__Campylobacteraceae	g__Campylobacter	s__Campylobacter sp. RM16704
ASV011566	A810982	0.002	22.3.2021	2021	Spring	Finland	Hanko	59.8283	22.9659	Male	Adult	k__Bacteria	p__Proteobacteria	c__Gammaproteobacteria	o__Enterobacterales	f__Enterobacteriaceae	g__Escherichia-Shigella	s__Escherichia marmotae
ASV011709	LV24	0.002	20.9.2020	2020	Autumn	Latvia	Pape	56.1625	21.0656	Male	Adult	k__Bacteria	p__Campylobacterota	c__Campylobacteria	o__Campylobacterales	f__Campylobacteraceae	g__Campylobacter	s__Campylobacter sp. RM16704
ASV011810	D27	0.002	27.5.2021	2021	Breeding	France	Chize forest	46.0951	0.4133	Female	Unknown	k__Bacteria	p__Firmicutes	c__Clostridia	o__Clostridiales	f__Clostridiaceae	g__Clostridium sensu stricto 1	s__Clostridium perfringens
ASV011904	11_vantaa	0.002	14.9.2020	2020	Breeding	Finland	Lansinnatus	60.249	25.118	Male	Adult	k__Bacteria	p__Actinobacteriota	c__Actinobacteria	o__Corynebacteriales	f__Mycobacteriaceae	g__Mycobacterium	s__
ASV011993	8A85322	0.002	20.7.2020	2020	Breeding	Denmark	Tinning Mose	56.266	9.957	Female	Adult	k__Bacteria	p__Proteobacteria	c__Gammaproteobacteria	o__Enterobacterales	f__Enterobacteriaceae	g__Escherichia-Shigella	s__Escherichia marmotae
ASV012086	5_vantaa	0.002	2.9.2020	2020	Breeding	Finland	Lansinnatus	60.249	25.118	Female	Young	k__Bacteria	p__Actinobacteriota	c__Actinobacteria	o__Corynebacteriales	f__Nocardiaceae	g__Nocardia	s__Nocardia sp. DSM 43395
ASV012095	11_denmark	0.002	1.8.2020	2020	Breeding	Denmark	Svendborg	55.0557	Oct.31	Male	Adult	k__Bacteria	p__Proteobacteria	c__Gammaproteobacteria	o__Pseudomonadales	f__Pseudomonadaceae	g__Pseudomonas	s__Pseudomonas lundensis
ASV012225	8E13246	0.002	Unknown	2020	NA	Denmark	Tinning Mose	56.266	9.957	Female	Adult	k__Bacteria	p__Firmicutes	c__Clostridia	o__Clostridiales	f__Clostridiaceae	g__Clostridium sensu stricto 1	s__Clostridium sp. Marseille-P2414
ASV012256	7_vantaa	0.002	2.9.2020	2020	Breeding	Finland	Lansinnatus	60.249	25.118	Male	Young	k__Bacteria	p__Proteobacteria	c__Gammaproteobacteria	o__Pseudomonadales	f__Pseudomonadaceae	g__Pseudomonas	s__Pseudomonas sp. VTT E-052924
ASV012348	LV29	0.002	23.9.2020	2020	Autumn	Latvia	Pape	56.1625	21.0656	Female	Young	k__Bacteria	p__Proteobacteria	c__Gammaproteobacteria	o__Enterobacterales	f__Enterobacteriaceae	g__Escherichia-Shigella	s__Escherichia marmotae
ASV012458	A809583	0.002	9.8.2020	2020	Breeding	Finland	Hanko	59.8283	22.9659	Male	Young	k__Bacteria	p__Proteobacteria	c__Gammaproteobacteria	o__Enterobacterales	f__Vibrionaceae	g__Vibrio	s__Vibrio aphrogenes
ASV012558	11_denmark	0.002	1.8.2020	2020	Breeding	Denmark	Svendborg	55.0557	Oct.31	Male	Adult	k__Bacteria	p__Proteobacteria	c__Gammaproteobacteria	o__Pseudomonadales	f__Pseudomonadaceae	g__Pseudomonas	s__Pseudomonas auricularis
ASV012607	8A85329	0.002	5.8.2020	2020	Breeding	Denmark	Tinning Mose	56.266	9.957	Male	Young	k__Bacteria	p__Proteobacteria	c__Gammaproteobacteria	o__Enterobacterales	f__Enterobacteriaceae	g__Escherichia-Shigella	s__Escherichia coli UMN026
ASV012618	14_denmark	0.002	20.9.2020	2020	Autumn	Denmark	Hjulby	55.3422	Oct.66	Male	Young	k__Bacteria	p__Actinobacteriota	c__Actinobacteria	o__Corynebacteriales	f__Mycobacteriaceae	g__Mycobacterium	s__
ASV012639	11_vantaa	0.002	14.9.2020	2020	Breeding	Finland	Lansinnatus	60.249	25.118	Male	Adult	k__Bacteria	p__Actinobacteriota	c__Actinobacteria	o__Corynebacteriales	f__Mycobacteriaceae	g__Mycobacterium	s__
ASV012973	15_denmark	0.002	20.9.2020	2020	Autumn	Denmark	Hjulby	55.3422	Oct.66	Male	Young	k__Bacteria	p__Firmicutes	c__Bacilli	o__Mycoplasmatales	f__Mycoplasmataceae	g__Mycoplasma	s__Malacoplasma microti
ASV013108	1_denmark	0.002	11.7.2020	2020	Breeding	Denmark	Svendborg	55.0557	Oct.31	Male	Adult	k__Bacteria	p__Firmicutes	c__Bacilli	o__Bacillales	f__Bacillaceae	g__Bacillus	s__Bacillus longiquaesitum
ASV013296	LV18	0.002	19.9.2020	2020	Autumn	Latvia	Pape	56.1625	21.0656	Female	Adult	k__Bacteria	p__Proteobacteria	c__Gammaproteobacteria	o__Legionellales	f__Legionellaceae	g__Legionella	s__
ASV013354	14_denmark	0.002	20.9.2020	2020	Autumn	Denmark	Hjulby	55.3422	Oct.66	Male	Young	k__Bacteria	p__Actinobacteriota	c__Actinobacteria	o__Corynebacteriales	f__Mycobacteriaceae	g__Mycobacterium	s__
ASV013729	3_denmark	0.002	11.7.2020	2020	Breeding	Denmark	Svendborg	55.0557	Oct.31	Female	Adult	k__Bacteria	p__Actinobacteriota	c__Actinobacteria	o__Corynebacteriales	f__Mycobacteriaceae	g__Mycobacterium	s__
ASV013868	A686068	0.002	5.10.2020	2020	Autumn	Finland	Karjaa	60.0715	23.662	Male	Young	k__Bacteria	p__Campylobacterota	c__Campylobacteria	o__Campylobacterales	f__Campylobacteraceae	g__Campylobacter	s__Campylobacter jejuni subsp. jejuni LMG 23211
ASV013935	14_denmark	0.002	20.9.2020	2020	Autumn	Denmark	Hjulby	55.3422	Oct.66	Male	Young	k__Bacteria	p__Firmicutes	c__Clostridia	o__Clostridiales	f__Clostridiaceae	g__Clostridium sensu stricto 1	s__
ASV014074	A810920	0.002	12.8.2020	2020	Breeding	Finland	Hanko	59.8283	22.9659	Male	Young	k__Bacteria	p__Proteobacteria	c__Gammaproteobacteria	o__Enterobacterales	f__Enterobacteriaceae	g__Escherichia-Shigella	s__Escherichia coli
ASV014154	LV13	0.002	19.9.2020	2020	Autumn	Latvia	Pape	56.1625	21.0656	Female	Adult	k__Bacteria	p__Actinobacteriota	c__Actinobacteria	o__Corynebacteriales	f__Mycobacteriaceae	g__Mycobacterium	s__
ASV014226	9_denmark	0.002	21.7.2020	2020	Breeding	Denmark	Svendborg	55.0557	Oct.31	Female	Adult	k__Bacteria	p__Firmicutes	c__Clostridia	o__Clostridiales	f__Clostridiaceae	g__Clostridium sensu stricto 1	s__
ASV014233	7_vantaa	0.002	2.9.2020	2020	Breeding	Finland	Lansinnatus	60.249	25.118	Male	Young	k__Bacteria	p__Actinobacteriota	c__Actinobacteria	o__Corynebacteriales	f__Corynebacteriaceae	g__Corynebacterium	s__
ASV014613	A809585	0.002	11.8.2020	2020	Breeding	Finland	Hanko	59.8283	22.9659	Male	Young	k__Bacteria	p__Proteobacteria	c__Gammaproteobacteria	o__Enterobacterales	f__Enterobacteriaceae	g__Citrobacter	s__Citrobacter werkmanii
ASV014804	9_denmark	0.002	21.7.2020	2020	Breeding	Denmark	Svendborg	55.0557	Oct.31	Female	Adult	k__Bacteria	p__Firmicutes	c__Clostridia	o__Clostridiales	f__Clostridiaceae	g__Clostridium sensu stricto 1	s__
ASV014808	8E13246	0.002	Unknown	2020	NA	Denmark	Tinning Mose	56.266	9.957	Female	Adult	k__Bacteria	p__Proteobacteria	c__Gammaproteobacteria	o__Enterobacterales	f__Enterobacteriaceae	g__Escherichia-Shigella	s__Escherichia marmotae
ASV015154	11_denmark	0.002	1.8.2020	2020	Breeding	Denmark	Svendborg	55.0557	Oct.31	Male	Adult	k__Bacteria	p__Proteobacteria	c__Gammaproteobacteria	o__Legionellales	f__Legionellaceae	g__Legionella	s__Legionella sp. L-29
ASV015534	6_vantaa	0.002	2.9.2020	2020	Breeding	Finland	Lansinnatus	60.249	25.118	Male	Young	k__Bacteria	p__Proteobacteria	c__Gammaproteobacteria	o__Enterobacterales	f__Yersiniaceae	g__Serratia	s__Rahnella sp. 'CDC 21234'
ASV015536	A686078	0.002	4.6.2020	2020	Breeding	Finland	Karjaa	60.0715	23.662	Male	Adult	k__Bacteria	p__Proteobacteria	c__Gammaproteobacteria	o__Enterobacterales	f__Yersiniaceae	g__Serratia	s__Serratia sp. AS12
ASV015564	19_vantaa	0.002	13.10.2020	2020	Autumn	Finland	Lansinnatus	60.249	25.118	Male	Adult	k__Bacteria	p__Actinobacteriota	c__Actinobacteria	o__Corynebacteriales	f__Mycobacteriaceae	g__Mycobacterium	s__
ASV015638	LV13	0.002	19.9.2020	2020	Autumn	Latvia	Pape	56.1625	21.0656	Female	Adult	k__Bacteria	p__Firmicutes	c__Clostridia	o__Clostridiales	f__Clostridiaceae	g__Clostridium sensu stricto 1	s__
ASV015862	14_chize	0.002	31.5.2021	2021	Breeding	France	Chize forest	46.1523	0.437	Female	Unknown	k__Bacteria	p__Firmicutes	c__Bacilli	o__Mycoplasmatales	f__Mycoplasmataceae	g__Ureaplasma	s__
ASV015911	D2	0.002	12.5.2021	2021	Breeding	France	Chize forest	46.1269	0.4244	Male	Unknown	k__Bacteria	p__Firmicutes	c__Bacilli	o__Mycoplasmatales	f__Mycoplasmataceae	g__Ureaplasma	s__
ASV016214	8A85324	0.002	30.7.2020	2020	Breeding	Denmark	Tinning Mose	56.266	9.957	Male	Adult	k__Bacteria	p__Firmicutes	c__Bacilli	o__Mycoplasmatales	f__Mycoplasmataceae	g__Mycoplasma	s__
ASV016313	10_chize	0.002	20.5.2021	2021	Breeding	France	Chize forest	46.1578	0.4308	Male	Unknown	k__Bacteria	p__Firmicutes	c__Bacilli	o__Mycoplasmatales	f__Mycoplasmataceae	g__Ureaplasma	s__
ASV016428	11_vantaa	0.002	14.9.2020	2020	Breeding	Finland	Lansinnatus	60.249	25.118	Male	Adult	k__Bacteria	p__Proteobacteria	c__Gammaproteobacteria	o__Legionellales	f__Legionellaceae	g__Legionella	s__Legionella nautarum
ASV016885	LV18	0.002	19.9.2020	2020	Autumn	Latvia	Pape	56.1625	21.0656	Female	Adult	k__Bacteria	p__Proteobacteria	c__Gammaproteobacteria	o__Enterobacterales	f__Enterobacteriaceae	g__Escherichia-Shigella	s__Escherichia marmotae
ASV017136	14_denmark	0.002	20.9.2020	2020	Autumn	Denmark	Hjulby	55.3422	Oct.66	Male	Young	k__Bacteria	p__Actinobacteriota	c__Actinobacteria	o__Corynebacteriales	f__Mycobacteriaceae	g__Mycobacterium	s__
ASV017166	5_vantaa	0.002	2.9.2020	2020	Breeding	Finland	Lansinnatus	60.249	25.118	Female	Young	k__Bacteria	p__Actinobacteriota	c__Actinobacteria	o__Corynebacteriales	f__Mycobacteriaceae	g__Mycobacterium	s__
ASV017212	9_denmark	0.002	21.7.2020	2020	Breeding	Denmark	Svendborg	55.0557	Oct.31	Female	Adult	k__Bacteria	p__Firmicutes	c__Clostridia	o__Clostridiales	f__Clostridiaceae	g__Clostridium sensu stricto 13	s__
ASV017800	13_denmark	0.002	14.9.2020	2020	Breeding	Denmark	Bagenkop	54.728	Oct.52	Male	Young	k__Bacteria	p__Proteobacteria	c__Gammaproteobacteria	o__Pseudomonadales	f__Pseudomonadaceae	g__Pseudomonas	s__Pseudomonas versuta
ASV017988	14_denmark	0.002	20.9.2020	2020	Autumn	Denmark	Hjulby	55.3422	Oct.66	Male	Young	k__Bacteria	p__Firmicutes	c__Clostridia	o__Clostridiales	f__Clostridiaceae	g__Clostridium sensu stricto 1	s__
ASV018032	9_denmark	0.002	21.7.2020	2020	Breeding	Denmark	Svendborg	55.0557	Oct.31	Female	Adult	k__Bacteria	p__Firmicutes	c__Bacilli	o__Mycoplasmatales	f__Mycoplasmataceae	g__Mycoplasma	s__Mycoplasma moatsii ATCC 27625
ASV018299	A810986	0.002	24.3.2021	2021	Spring	Finland	Hanko	59.8283	22.9659	Female	Adult	k__Bacteria	p__Campylobacterota	c__Campylobacteria	o__Campylobacterales	f__Campylobacteraceae	g__Campylobacter	s__Campylobacter sp. RM16704
ASV018432	9_denmark	0.002	21.7.2020	2020	Breeding	Denmark	Svendborg	55.0557	Oct.31	Female	Adult	k__Bacteria	p__Firmicutes	c__Clostridia	o__Clostridiales	f__Clostridiaceae	g__Clostridium sensu stricto 1	s__
ASV019119	9_denmark	0.002	21.7.2020	2020	Breeding	Denmark	Svendborg	55.0557	Oct.31	Female	Adult	k__Bacteria	p__Firmicutes	c__Bacilli	o__Bacillales	f__Bacillaceae	g__Bacillus	s__
ASV019198	8_vantaa	0.002	2.9.2020	2020	Breeding	Finland	Lansinnatus	60.249	25.118	Male	Young	k__Bacteria	p__Proteobacteria	c__Gammaproteobacteria	o__Enterobacterales	f__Enterobacteriaceae	g__Escherichia-Shigella	s__Escherichia marmotae
ASV019579	9_denmark	0.002	21.7.2020	2020	Breeding	Denmark	Svendborg	55.0557	Oct.31	Female	Adult	k__Bacteria	p__Firmicutes	c__Clostridia	o__Clostridiales	f__Clostridiaceae	g__Clostridium sensu stricto 1	s__
ASV019778	9_denmark	0.002	21.7.2020	2020	Breeding	Denmark	Svendborg	55.0557	Oct.31	Female	Adult	k__Bacteria	p__Firmicutes	c__Bacilli	o__Bacillales	f__Bacillaceae	g__Bacillus	s__
ASV019918	8A85286	0.002	19.8.2020	2020	Breeding	Denmark	Tinning Mose	56.266	9.957	Male	Young	k__Bacteria	p__Proteobacteria	c__Gammaproteobacteria	o__Pseudomonadales	f__Pseudomonadaceae	g__Pseudomonas	s__Pseudomonas antarctica
ASV020285	1_vantaa	0.002	1.9.2020	2020	Breeding	Finland	Lansinnatus	60.249	25.118	Male	Young	k__Bacteria	p__Proteobacteria	c__Gammaproteobacteria	o__Pseudomonadales	f__Pseudomonadaceae	g__Pseudomonas	s__Pseudomonas rhizosphaerae
ASV020492	7_vantaa	0.002	2.9.2020	2020	Breeding	Finland	Lansinnatus	60.249	25.118	Male	Young	k__Bacteria	p__Proteobacteria	c__Gammaproteobacteria	o__Pseudomonadales	f__Pseudomonadaceae	g__Pseudomonas	s__Pseudomonas sp. WB4.4-99
ASV020736	12_denmark	0.002	16.8.2020	2020	Breeding	Denmark	Bagenkop	54.728	Oct.52	Unknown	Young	k__Bacteria	p__Proteobacteria	c__Gammaproteobacteria	o__Pseudomonadales	f__Moraxellaceae	g__Acinetobacter	s__
ASV021649	1_denmark	0.002	11.7.2020	2020	Breeding	Denmark	Svendborg	55.0557	Oct.31	Male	Adult	k__Bacteria	p__Firmicutes	c__Bacilli	o__Bacillales	f__Bacillaceae	g__Bacillus	s__Bacillus longiquaesitum
ASV021951	19_vantaa	0.002	13.10.2020	2020	Autumn	Finland	Lansinnatus	60.249	25.118	Male	Adult	k__Bacteria	p__Proteobacteria	c__Gammaproteobacteria	o__Enterobacterales	f__Yersiniaceae	g__Serratia	s__Serratia fonticola
ASV022650	8A85322	0.002	20.7.2020	2020	Breeding	Denmark	Tinning Mose	56.266	9.957	Female	Adult	k__Bacteria	p__Firmicutes	c__Clostridia	o__Clostridiales	f__Clostridiaceae	g__Clostridium sensu stricto 1	s__Clostridium sp. Marseille-P2414
ASV022777	A810991	0.002	25.3.2021	2021	Spring	Finland	Hanko	59.8283	22.9659	Male	Adult	k__Bacteria	p__Campylobacterota	c__Campylobacteria	o__Campylobacterales	f__Campylobacteraceae	g__Campylobacter	s__Campylobacter sp. RM16704
ASV024643	8A85329	0.002	5.8.2020	2020	Breeding	Denmark	Tinning Mose	56.266	9.957	Male	Young	k__Bacteria	p__Firmicutes	c__Clostridia	o__Clostridiales	f__Clostridiaceae	g__Clostridium sensu stricto 1	s__Clostridium perfringens
ASV025292	LV30	0.002	25.9.2020	2020	Autumn	Latvia	Pape	56.1625	21.0656	Female	Young	k__Bacteria	p__Campylobacterota	c__Campylobacteria	o__Campylobacterales	f__Campylobacteraceae	g__Campylobacter	s__Campylobacter jejuni subsp. jejuni LMG 23211
ASV025367	9_denmark	0.002	21.7.2020	2020	Breeding	Denmark	Svendborg	55.0557	Oct.31	Female	Adult	k__Bacteria	p__Firmicutes	c__Bacilli	o__Bacillales	f__Bacillaceae	g__Bacillus	s__
ASV027282	6_denmark	0.002	21.7.2020	2020	Breeding	Denmark	Svendborg	55.0557	Oct.31	Unknown	Young	k__Bacteria	p__Firmicutes	c__Bacilli	o__Staphylococcales	f__Staphylococcaceae	g__Staphylococcus	s__Staphylococcus agnetis
ASV028473	9_denmark	0.002	21.7.2020	2020	Breeding	Denmark	Svendborg	55.0557	Oct.31	Female	Adult	k__Bacteria	p__Firmicutes	c__Bacilli	o__Staphylococcales	f__Staphylococcaceae	g__Staphylococcus	s__Staphylococcus xylosus
ASV029192	LV45	0.002	30.9.2020	2020	Autumn	Latvia	Pape	56.1625	21.0656	Male	Young	k__Bacteria	p__Proteobacteria	c__Gammaproteobacteria	o__Pseudomonadales	f__Pseudomonadaceae	g__Pseudomonas	s__Pseudomonas sp. TKP
ASV029441	LV09	0.002	17.9.2020	2020	Autumn	Latvia	Pape	56.1625	21.0656	Male	Young	k__Bacteria	p__Firmicutes	c__Bacilli	o__Lactobacillales	f__Enterococcaceae	g__Enterococcus	s__Enterococcus cecorum DSM 20682 = ATCC 43198
ASV035189	D27	0.002	27.5.2021	2021	Breeding	France	Chize forest	46.0951	0.4133	Female	Unknown	k__Bacteria	p__Firmicutes	c__Clostridia	o__Clostridiales	f__Clostridiaceae	g__Clostridium sensu stricto 1	s__Clostridium sp. Marseille-P2414
ASV036369	9_denmark	0.002	21.7.2020	2020	Breeding	Denmark	Svendborg	55.0557	Oct.31	Female	Adult	k__Bacteria	p__Firmicutes	c__Bacilli	o__Mycoplasmatales	f__Mycoplasmataceae	g__Mycoplasma	s__Mycoplasma penetrans HF-2
ASV036653	19_vantaa	0.002	13.10.2020	2020	Autumn	Finland	Lansinnatus	60.249	25.118	Male	Adult	k__Bacteria	p__Proteobacteria	c__Gammaproteobacteria	o__Enterobacterales	f__Yersiniaceae	g__Serratia	s__Serratia fonticola
ASV037370	8A85324	0.002	30.7.2020	2020	Breeding	Denmark	Tinning Mose	56.266	9.957	Male	Adult	k__Bacteria	p__Firmicutes	c__Bacilli	o__Mycoplasmatales	f__Mycoplasmataceae	g__Mycoplasma	s__Mycoplasma penetrans HF-2
ASV037740	A810982	0.002	22.3.2021	2021	Spring	Finland	Hanko	59.8283	22.9659	Male	Adult	k__Bacteria	p__Proteobacteria	c__Gammaproteobacteria	o__Enterobacterales	f__Enterobacteriaceae	g__Escherichia-Shigella	s__Escherichia marmotae
ASV038052	1_vantaa	0.002	1.9.2020	2020	Breeding	Finland	Lansinnatus	60.249	25.118	Male	Young	k__Bacteria	p__Proteobacteria	c__Gammaproteobacteria	o__Pseudomonadales	f__Pseudomonadaceae	g__Pseudomonas	s__Pseudomonas sp. KSH3
ASV040157	8_denmark	0.002	21.7.2020	2020	Breeding	Denmark	Svendborg	55.0557	Oct.31	Male	Young	k__Bacteria	p__Proteobacteria	c__Gammaproteobacteria	o__Pseudomonadales	f__Pseudomonadaceae	g__Pseudomonas	s__Pseudomonas oryzihabitans
ASV040443	A810987	0.002	24.3.2021	2021	Spring	Finland	Hanko	59.8283	22.9659	Male	Adult	k__Bacteria	p__Actinobacteriota	c__Actinobacteria	o__Corynebacteriales	f__Mycobacteriaceae	g__Mycobacterium	s__
ASV041681	LV02	0.002	21.8.2020	2020	Breeding	Latvia	Pape	56.1625	21.0656	Female	Young	k__Bacteria	p__Proteobacteria	c__Gammaproteobacteria	o__Enterobacterales	f__Enterobacteriaceae	g__Escherichia-Shigella	s__Escherichia coli
ASV044777	19_vantaa	0.002	13.10.2020	2020	Autumn	Finland	Lansinnatus	60.249	25.118	Male	Adult	k__Bacteria	p__Actinobacteriota	c__Actinobacteria	o__Corynebacteriales	f__Mycobacteriaceae	g__Mycobacterium	s__
ASV044837	LV24	0.002	20.9.2020	2020	Autumn	Latvia	Pape	56.1625	21.0656	Male	Adult	k__Bacteria	p__Campylobacterota	c__Campylobacteria	o__Campylobacterales	f__Campylobacteraceae	g__Campylobacter	s__Campylobacter sp. RM16704
ASV045128	2_vantaa	0.002	2.9.2020	2020	Breeding	Finland	Lansinnatus	60.249	25.118	Male	Young	k__Bacteria	p__Firmicutes	c__Bacilli	o__Staphylococcales	f__Staphylococcaceae	g__Staphylococcus	s__Staphylococcus epidermidis
ASV046806	19_vantaa	0.002	13.10.2020	2020	Autumn	Finland	Lansinnatus	60.249	25.118	Male	Adult	k__Bacteria	p__Proteobacteria	c__Gammaproteobacteria	o__Pseudomonadales	f__Pseudomonadaceae	g__Pseudomonas	s__Pseudomonas fragi
ASV046810	8_denmark	0.002	21.7.2020	2020	Breeding	Denmark	Svendborg	55.0557	Oct.31	Male	Young	k__Bacteria	p__Proteobacteria	c__Gammaproteobacteria	o__Pseudomonadales	f__Pseudomonadaceae	g__Pseudomonas	s__Pseudomonas sp. FDAARGOS_380
ASV046997	19_vantaa	0.002	13.10.2020	2020	Autumn	Finland	Lansinnatus	60.249	25.118	Male	Adult	k__Bacteria	p__Proteobacteria	c__Gammaproteobacteria	o__Enterobacterales	f__Yersiniaceae	g__Yersinia	s__Yersinia aldovae 670-83
ASV048467	13_denmark	0.002	14.9.2020	2020	Breeding	Denmark	Bagenkop	54.728	Oct.52	Male	Young	k__Bacteria	p__Proteobacteria	c__Gammaproteobacteria	o__Pseudomonadales	f__Pseudomonadaceae	g__Pseudomonas	s__Pseudomonas sp. FDAARGOS_380
ASV048474	14_chize	0.002	31.5.2021	2021	Breeding	France	Chize forest	46.1523	0.437	Female	Unknown	k__Bacteria	p__Firmicutes	c__Bacilli	o__Mycoplasmatales	f__Mycoplasmataceae	g__Ureaplasma	s__
ASV048497	5_vantaa	0.002	2.9.2020	2020	Breeding	Finland	Lansinnatus	60.249	25.118	Female	Young	k__Bacteria	p__Firmicutes	c__Bacilli	o__Bacillales	f__Bacillaceae	g__Bacillus	s__Bacillus megaterium
ASV050092	11_vantaa	0.002	14.9.2020	2020	Breeding	Finland	Lansinnatus	60.249	25.118	Male	Adult	k__Bacteria	p__Campylobacterota	c__Campylobacteria	o__Campylobacterales	f__Campylobacteraceae	g__Campylobacter	s__Campylobacter jejuni subsp. jejuni LMG 23269
ASV050125	LV29	0.002	23.9.2020	2020	Autumn	Latvia	Pape	56.1625	21.0656	Female	Young	k__Bacteria	p__Proteobacteria	c__Gammaproteobacteria	o__Enterobacterales	f__Enterobacteriaceae	g__Escherichia-Shigella	s__Escherichia marmotae
ASV052048	A810992	0.002	25.3.2021	2021	Spring	Finland	Hanko	59.8283	22.9659	Female	Adult	k__Bacteria	p__Firmicutes	c__Bacilli	o__Mycoplasmatales	f__Mycoplasmataceae	g__Ureaplasma	s__
ASV052721	LV30	0.002	25.9.2020	2020	Autumn	Latvia	Pape	56.1625	21.0656	Female	Young	k__Bacteria	p__Proteobacteria	c__Gammaproteobacteria	o__Enterobacterales	f__Enterobacteriaceae	g__Escherichia-Shigella	s__Escherichia marmotae
ASV055820	A686081	0.002	24.9.2020	2020	Autumn	Finland	Karjaa	60.0715	23.662	Male	Young	k__Bacteria	p__Campylobacterota	c__Campylobacteria	o__Campylobacterales	f__Campylobacteraceae	g__Campylobacter	s__Campylobacter jejuni subsp. jejuni LMG 23211
ASV056190	1_denmark	0.002	11.7.2020	2020	Breeding	Denmark	Svendborg	55.0557	Oct.31	Male	Adult	k__Bacteria	p__Proteobacteria	c__Gammaproteobacteria	o__Enterobacterales	f__Enterobacteriaceae	g__Citrobacter	s__Citrobacter werkmanii
ASV057122	3_denmark	0.002	11.7.2020	2020	Breeding	Denmark	Svendborg	55.0557	Oct.31	Female	Adult	k__Bacteria	p__Proteobacteria	c__Gammaproteobacteria	o__Enterobacterales	f__Enterobacteriaceae	g__Escherichia-Shigella	s__Escherichia marmotae
ASV057300	LV45	0.002	30.9.2020	2020	Autumn	Latvia	Pape	56.1625	21.0656	Male	Young	k__Bacteria	p__Campylobacterota	c__Campylobacteria	o__Campylobacterales	f__Campylobacteraceae	g__Campylobacter	s__Campylobacter jejuni subsp. jejuni LMG 23269
ASV057630	8A85322	0.002	20.7.2020	2020	Breeding	Denmark	Tinning Mose	56.266	9.957	Female	Adult	k__Bacteria	p__Firmicutes	c__Clostridia	o__Clostridiales	f__Clostridiaceae	g__Clostridium sensu stricto 1	s__Clostridium sp. Marseille-P2414
ASV057746	13_denmark	0.002	14.9.2020	2020	Breeding	Denmark	Bagenkop	54.728	Oct.52	Male	Young	k__Bacteria	p__Proteobacteria	c__Gammaproteobacteria	o__Pseudomonadales	f__Pseudomonadaceae	g__Pseudomonas	s__Pseudomonas antarctica
ASV057884	A810986	0.002	24.3.2021	2021	Spring	Finland	Hanko	59.8283	22.9659	Female	Adult	k__Bacteria	p__Campylobacterota	c__Campylobacteria	o__Campylobacterales	f__Campylobacteraceae	g__Campylobacter	s__Campylobacter sp. RM16704
ASV058088	A810988	0.002	24.3.2021	2021	Spring	Finland	Hanko	59.8283	22.9659	Male	Adult	k__Bacteria	p__Proteobacteria	c__Gammaproteobacteria	o__Enterobacterales	f__Enterobacteriaceae	g__Escherichia-Shigella	s__Escherichia marmotae
ASV058801	A810982	0.002	22.3.2021	2021	Spring	Finland	Hanko	59.8283	22.9659	Male	Adult	k__Bacteria	p__Proteobacteria	c__Gammaproteobacteria	o__Enterobacterales	f__Enterobacteriaceae	g__Escherichia-Shigella	s__Escherichia marmotae
ASV059390	9_vantaa	0.002	14.9.2020	2020	Breeding	Finland	Lansinnatus	60.249	25.118	Female	Young	k__Bacteria	p__Proteobacteria	c__Gammaproteobacteria	o__Enterobacterales	f__Enterobacteriaceae	g__Escherichia-Shigella	s__Escherichia marmotae
ASV059736	A810987	0.002	24.3.2021	2021	Spring	Finland	Hanko	59.8283	22.9659	Male	Adult	k__Bacteria	p__Actinobacteriota	c__Actinobacteria	o__Corynebacteriales	f__Mycobacteriaceae	g__Mycobacterium	s__
ASV059741	2_vantaa	0.002	2.9.2020	2020	Breeding	Finland	Lansinnatus	60.249	25.118	Male	Young	k__Bacteria	p__Proteobacteria	c__Gammaproteobacteria	o__Enterobacterales	f__Enterobacteriaceae	g__Escherichia-Shigella	s__Escherichia coli
ASV059831	13_vantaa	0.002	1.10.2020	2020	Autumn	Finland	Lansinnatus	60.249	25.118	Male	Adult	k__Bacteria	p__Proteobacteria	c__Gammaproteobacteria	o__Enterobacterales	f__Enterobacteriaceae	g__Escherichia-Shigella	s__Escherichia marmotae
ASV060174	D27	0.002	27.5.2021	2021	Breeding	France	Chize forest	46.0951	0.4133	Female	Unknown	k__Bacteria	p__Firmicutes	c__Clostridia	o__Clostridiales	f__Clostridiaceae	g__Clostridium sensu stricto 1	s__Clostridium sp. Marseille-P2414
ASV060565	A686068	0.002	5.10.2020	2020	Autumn	Finland	Karjaa	60.0715	23.662	Male	Young	k__Bacteria	p__Campylobacterota	c__Campylobacteria	o__Campylobacterales	f__Campylobacteraceae	g__Campylobacter	s__Campylobacter jejuni subsp. jejuni LMG 23211
ASV060812	6_vantaa	0.002	2.9.2020	2020	Breeding	Finland	Lansinnatus	60.249	25.118	Male	Young	k__Bacteria	p__Proteobacteria	c__Gammaproteobacteria	o__Enterobacterales	f__Yersiniaceae	g__Serratia	s__Rahnella sp. 'CDC 21234'
ASV061083	LV45	0.002	30.9.2020	2020	Autumn	Latvia	Pape	56.1625	21.0656	Male	Young	k__Bacteria	p__Campylobacterota	c__Campylobacteria	o__Campylobacterales	f__Campylobacteraceae	g__Campylobacter	s__Campylobacter jejuni subsp. jejuni LMG 23269
ASV062313	2_vantaa	0.002	2.9.2020	2020	Breeding	Finland	Lansinnatus	60.249	25.118	Male	Young	k__Bacteria	p__Proteobacteria	c__Gammaproteobacteria	o__Enterobacterales	f__Enterobacteriaceae	g__Escherichia-Shigella	s__Escherichia coli
ASV062358	A686067	0.002	31.5.2020	2020	Breeding	Finland	Karjaa	60.0715	23.662	Male	Adult	k__Bacteria	p__Campylobacterota	c__Campylobacteria	o__Campylobacterales	f__Campylobacteraceae	g__Campylobacter	s__Campylobacter sp. RM16704
ASV064861	1_vantaa	0.002	1.9.2020	2020	Breeding	Finland	Lansinnatus	60.249	25.118	Male	Young	k__Bacteria	p__Proteobacteria	c__Gammaproteobacteria	o__Pseudomonadales	f__Pseudomonadaceae	g__Pseudomonas	s__Pseudomonas sp. CL1.82
ASV066322	A810982	0.002	22.3.2021	2021	Spring	Finland	Hanko	59.8283	22.9659	Male	Adult	k__Bacteria	p__Proteobacteria	c__Gammaproteobacteria	o__Enterobacterales	f__Enterobacteriaceae	g__Escherichia-Shigella	s__Escherichia marmotae
ASV066957	14_vantaa	0.002	1.10.2020	2020	Autumn	Finland	Lansinnatus	60.249	25.118	Male	Adult	k__Bacteria	p__Campylobacterota	c__Campylobacteria	o__Campylobacterales	f__Helicobacteraceae	g__Helicobacter	s__Helicobacter sp. 'B52D Seymour'
ASV068238	A810986	0.002	24.3.2021	2021	Spring	Finland	Hanko	59.8283	22.9659	Female	Adult	k__Bacteria	p__Proteobacteria	c__Gammaproteobacteria	o__Enterobacterales	f__Enterobacteriaceae	g__Escherichia-Shigella	s__Escherichia marmotae
ASV068438	LV47	0.002	30.9.2020	2020	Autumn	Latvia	Pape	56.1625	21.0656	Female	Young	k__Bacteria	p__Campylobacterota	c__Campylobacteria	o__Campylobacterales	f__Helicobacteraceae	g__Helicobacter	s__Helicobacter anseris
ASV069463	1_denmark	0.002	11.7.2020	2020	Breeding	Denmark	Svendborg	55.0557	Oct.31	Male	Adult	k__Bacteria	p__Proteobacteria	c__Gammaproteobacteria	o__Enterobacterales	f__Enterobacteriaceae	g__Escherichia-Shigella	s__Escherichia marmotae
ASV070600	1_denmark	0.002	11.7.2020	2020	Breeding	Denmark	Svendborg	55.0557	Oct.31	Male	Adult	k__Bacteria	p__Proteobacteria	c__Gammaproteobacteria	o__Pseudomonadales	f__Pseudomonadaceae	g__Pseudomonas	s__Pseudomonas fluorescens A506
ASV070945	8A85322	0.002	20.7.2020	2020	Breeding	Denmark	Tinning Mose	56.266	9.957	Female	Adult	k__Bacteria	p__Firmicutes	c__Clostridia	o__Clostridiales	f__Clostridiaceae	g__Clostridium sensu stricto 1	s__Clostridium sp. Marseille-P2414
ASV071781	8_denmark	0.002	21.7.2020	2020	Breeding	Denmark	Svendborg	55.0557	Oct.31	Male	Young	k__Bacteria	p__Proteobacteria	c__Gammaproteobacteria	o__Pseudomonadales	f__Pseudomonadaceae	g__Pseudomonas	s__Pseudomonas versuta
ASV071971	A810987	0.002	24.3.2021	2021	Spring	Finland	Hanko	59.8283	22.9659	Male	Adult	k__Bacteria	p__Firmicutes	c__Clostridia	o__Clostridiales	f__Clostridiaceae	g__Clostridium sensu stricto 1	s__Clostridium sp. Marseille-P2414
ASV072529	LV02	0.002	21.8.2020	2020	Breeding	Latvia	Pape	56.1625	21.0656	Female	Young	k__Bacteria	p__Proteobacteria	c__Gammaproteobacteria	o__Enterobacterales	f__Enterobacteriaceae	g__Escherichia-Shigella	s__Escherichia coli
ASV072908	14_denmark	0.002	20.9.2020	2020	Autumn	Denmark	Hjulby	55.3422	Oct.66	Male	Young	k__Bacteria	p__Firmicutes	c__Bacilli	o__Bacillales	f__Bacillaceae	g__Bacillus	s__Bacillus drentensis
ASV073302	A810987	0.002	24.3.2021	2021	Spring	Finland	Hanko	59.8283	22.9659	Male	Adult	k__Bacteria	p__Firmicutes	c__Clostridia	o__Clostridiales	f__Clostridiaceae	g__Clostridium sensu stricto 1	s__
ASV073434	11_denmark	0.002	1.8.2020	2020	Breeding	Denmark	Svendborg	55.0557	Oct.31	Male	Adult	k__Bacteria	p__Proteobacteria	c__Gammaproteobacteria	o__Pseudomonadales	f__Pseudomonadaceae	g__Pseudomonas	s__Pseudomonas fragi
ASV073520	D27	0.002	27.5.2021	2021	Breeding	France	Chize forest	46.0951	0.4133	Female	Unknown	k__Bacteria	p__Firmicutes	c__Clostridia	o__Clostridiales	f__Clostridiaceae	g__Clostridium sensu stricto 1	s__Clostridium sp. Marseille-P2414
ASV074324	LV09	0.002	17.9.2020	2020	Autumn	Latvia	Pape	56.1625	21.0656	Male	Young	k__Bacteria	p__Campylobacterota	c__Campylobacteria	o__Campylobacterales	f__Helicobacteraceae	g__Helicobacter	s__Helicobacter anseris
ASV076425	A809582	0.002	9.8.2020	2020	Breeding	Finland	Hanko	59.8283	22.9659	Male	Young	k__Bacteria	p__Proteobacteria	c__Gammaproteobacteria	o__Enterobacterales	f__Enterobacteriaceae	g__Escherichia-Shigella	s__Escherichia marmotae
ASV076725	A810920	0.002	12.8.2020	2020	Breeding	Finland	Hanko	59.8283	22.9659	Male	Young	k__Bacteria	p__Proteobacteria	c__Gammaproteobacteria	o__Enterobacterales	f__Enterobacteriaceae	g__Escherichia-Shigella	s__Escherichia coli
ASV077427	9_vantaa	0.002	14.9.2020	2020	Breeding	Finland	Lansinnatus	60.249	25.118	Female	Young	k__Bacteria	p__Proteobacteria	c__Gammaproteobacteria	o__Enterobacterales	f__Enterobacteriaceae	g__Escherichia-Shigella	s__Escherichia albertii
ASV077903	9_denmark	0.002	21.7.2020	2020	Breeding	Denmark	Svendborg	55.0557	Oct.31	Female	Adult	k__Bacteria	p__Firmicutes	c__Bacilli	o__Bacillales	f__Bacillaceae	g__Bacillus	s__
ASV078377	1_vantaa	0.002	1.9.2020	2020	Breeding	Finland	Lansinnatus	60.249	25.118	Male	Young	k__Bacteria	p__Proteobacteria	c__Gammaproteobacteria	o__Enterobacterales	f__Yersiniaceae	g__Serratia	s__Rouxiella badensis
ASV080110	A810991	0.002	25.3.2021	2021	Spring	Finland	Hanko	59.8283	22.9659	Male	Adult	k__Bacteria	p__Campylobacterota	c__Campylobacteria	o__Campylobacterales	f__Campylobacteraceae	g__Campylobacter	s__Campylobacter jejuni
ASV082663	8E13246	0.002	Unknown	2020	NA	Denmark	Tinning Mose	56.266	9.957	Female	Adult	k__Bacteria	p__Proteobacteria	c__Gammaproteobacteria	o__Enterobacterales	f__Enterobacteriaceae	g__Escherichia-Shigella	s__Escherichia marmotae
ASV083680	3_denmark	0.002	11.7.2020	2020	Breeding	Denmark	Svendborg	55.0557	Oct.31	Female	Adult	k__Bacteria	p__Firmicutes	c__Bacilli	o__Mycoplasmatales	f__Mycoplasmataceae	g__Mycoplasma	s__Mycoplasma penetrans HF-2
ASV084330	A810982	0.002	22.3.2021	2021	Spring	Finland	Hanko	59.8283	22.9659	Male	Adult	k__Bacteria	p__Proteobacteria	c__Gammaproteobacteria	o__Enterobacterales	f__Enterobacteriaceae	g__Escherichia-Shigella	s__Escherichia marmotae
ASV084712	3_denmark	0.002	11.7.2020	2020	Breeding	Denmark	Svendborg	55.0557	Oct.31	Female	Adult	k__Bacteria	p__Proteobacteria	c__Gammaproteobacteria	o__Enterobacterales	f__Enterobacteriaceae	g__Escherichia-Shigella	s__Escherichia marmotae
ASV089295	9_denmark	0.002	21.7.2020	2020	Breeding	Denmark	Svendborg	55.0557	Oct.31	Female	Adult	k__Bacteria	p__Firmicutes	c__Clostridia	o__Clostridiales	f__Clostridiaceae	g__Clostridium sensu stricto 13	s__iron-reducing enrichment clone Cl-W3
ASV090554	16_denmark	0.002	22.9.2020	2020	Autumn	Denmark	Bagenkop	54.728	Oct.52	Male	Young	k__Bacteria	p__Proteobacteria	c__Gammaproteobacteria	o__Enterobacterales	f__Enterobacteriaceae	g__Escherichia-Shigella	s__Escherichia marmotae
ASV092449	11_denmark	0.002	1.8.2020	2020	Breeding	Denmark	Svendborg	55.0557	Oct.31	Male	Adult	k__Bacteria	p__Proteobacteria	c__Gammaproteobacteria	o__Pseudomonadales	f__Pseudomonadaceae	g__Pseudomonas	s__Pseudomonas versuta
ASV092521	LV45	0.002	30.9.2020	2020	Autumn	Latvia	Pape	56.1625	21.0656	Male	Young	k__Bacteria	p__Campylobacterota	c__Campylobacteria	o__Campylobacterales	f__Campylobacteraceae	g__Campylobacter	s__Campylobacter jejuni subsp. jejuni LMG 23269
ASV092841	LV02	0.002	21.8.2020	2020	Breeding	Latvia	Pape	56.1625	21.0656	Female	Young	k__Bacteria	p__Proteobacteria	c__Gammaproteobacteria	o__Pseudomonadales	f__Moraxellaceae	g__Acinetobacter	s__Acinetobacter ursingii DSM 16037 = CIP 107286
ASV092985	A810982	0.002	22.3.2021	2021	Spring	Finland	Hanko	59.8283	22.9659	Male	Adult	k__Bacteria	p__Campylobacterota	c__Campylobacteria	o__Campylobacterales	f__Campylobacteraceae	g__Campylobacter	s__Campylobacter jejuni subsp. jejuni HB93-13
ASV093207	A810987	0.002	24.3.2021	2021	Spring	Finland	Hanko	59.8283	22.9659	Male	Adult	k__Bacteria	p__Firmicutes	c__Clostridia	o__Clostridiales	f__Clostridiaceae	g__Clostridium sensu stricto 1	s__
ASV094057	A810982	0.002	22.3.2021	2021	Spring	Finland	Hanko	59.8283	22.9659	Male	Adult	k__Bacteria	p__Firmicutes	c__Bacilli	o__Lactobacillales	f__Streptococcaceae	g__Streptococcus	s__Streptococcus equinus ATCC 700338
ASV094987	2_vantaa	0.002	2.9.2020	2020	Breeding	Finland	Lansinnatus	60.249	25.118	Male	Young	k__Bacteria	p__Actinobacteriota	c__Actinobacteria	o__Corynebacteriales	f__Mycobacteriaceae	g__Mycobacterium	s__
ASV096148	VD_01	0.002	27.7.2020	2020	Breeding	Denmark	Tinning Mose	56.266	9.957	Female	Young	k__Bacteria	p__Campylobacterota	c__Campylobacteria	o__Campylobacterales	f__Campylobacteraceae	g__Campylobacter	s__Campylobacter sp. RM16704
ASV096395	A810984	0.002	23.3.2021	2021	Spring	Finland	Hanko	59.8283	22.9659	Female	Adult	k__Bacteria	p__Campylobacterota	c__Campylobacteria	o__Campylobacterales	f__Campylobacteraceae	g__Campylobacter	s__Campylobacter sp. RM16704
ASV097002	14_chize	0.002	31.5.2021	2021	Breeding	France	Chize forest	46.1523	0.437	Female	Unknown	k__Bacteria	p__Firmicutes	c__Bacilli	o__Mycoplasmatales	f__Mycoplasmataceae	g__Ureaplasma	s__
ASV097208	A810991	0.002	25.3.2021	2021	Spring	Finland	Hanko	59.8283	22.9659	Male	Adult	k__Bacteria	p__Campylobacterota	c__Campylobacteria	o__Campylobacterales	f__Campylobacteraceae	g__Campylobacter	s__Campylobacter sp. RM16704
ASV097457	3_denmark	0.002	11.7.2020	2020	Breeding	Denmark	Svendborg	55.0557	Oct.31	Female	Adult	k__Bacteria	p__Actinobacteriota	c__Actinobacteria	o__Corynebacteriales	f__Mycobacteriaceae	g__Mycobacterium	s__
ASV098241	9_denmark	0.002	21.7.2020	2020	Breeding	Denmark	Svendborg	55.0557	Oct.31	Female	Adult	k__Bacteria	p__Firmicutes	c__Clostridia	o__Clostridiales	f__Clostridiaceae	g__Clostridium sensu stricto 1	s__
ASV099083	12_denmark	0.002	16.8.2020	2020	Breeding	Denmark	Bagenkop	54.728	Oct.52	Unknown	Young	k__Bacteria	p__Proteobacteria	c__Gammaproteobacteria	o__Pseudomonadales	f__Pseudomonadaceae	g__Pseudomonas	s__Pseudomonas lurida
ASV099334	D27	0.002	27.5.2021	2021	Breeding	France	Chize forest	46.0951	0.4133	Female	Unknown	k__Bacteria	p__Campylobacterota	c__Campylobacteria	o__Campylobacterales	f__Campylobacteraceae	g__Campylobacter	s__Campylobacter sp. RM16704
ASV100498	9_denmark	0.002	21.7.2020	2020	Breeding	Denmark	Svendborg	55.0557	Oct.31	Female	Adult	k__Bacteria	p__Firmicutes	c__Clostridia	o__Clostridiales	f__Clostridiaceae	g__Clostridium sensu stricto 1	s__
ASV101198	A810986	0.002	24.3.2021	2021	Spring	Finland	Hanko	59.8283	22.9659	Female	Adult	k__Bacteria	p__Campylobacterota	c__Campylobacteria	o__Campylobacterales	f__Campylobacteraceae	g__Campylobacter	s__Campylobacter sp. RM16704
ASV101252	12_denmark	0.002	16.8.2020	2020	Breeding	Denmark	Bagenkop	54.728	Oct.52	Unknown	Young	k__Bacteria	p__Proteobacteria	c__Gammaproteobacteria	o__Pseudomonadales	f__Pseudomonadaceae	g__Pseudomonas	s__Pseudomonas lurida
ASV104176	9_denmark	0.002	21.7.2020	2020	Breeding	Denmark	Svendborg	55.0557	Oct.31	Female	Adult	k__Bacteria	p__Firmicutes	c__Clostridia	o__Clostridiales	f__Clostridiaceae	g__Clostridium sensu stricto 1	s__
ASV105934	LV45	0.002	30.9.2020	2020	Autumn	Latvia	Pape	56.1625	21.0656	Male	Young	k__Bacteria	p__Campylobacterota	c__Campylobacteria	o__Campylobacterales	f__Campylobacteraceae	g__Campylobacter	s__Campylobacter jejuni subsp. jejuni LMG 23269
ASV106148	8A85286	0.002	19.8.2020	2020	Breeding	Denmark	Tinning Mose	56.266	9.957	Male	Young	k__Bacteria	p__Firmicutes	c__Bacilli	o__Lactobacillales	f__Streptococcaceae	g__Streptococcus	s__Streptococcus salivarius subsp. thermophilus
ASV109210	D2	0.002	12.5.2021	2021	Breeding	France	Chize forest	46.1269	0.4244	Male	Unknown	k__Bacteria	p__Firmicutes	c__Bacilli	o__Mycoplasmatales	f__Mycoplasmataceae	g__Ureaplasma	s__
ASV110292	3_denmark	0.002	11.7.2020	2020	Breeding	Denmark	Svendborg	55.0557	Oct.31	Female	Adult	k__Bacteria	p__Firmicutes	c__Bacilli	o__Lactobacillales	f__Streptococcaceae	g__Streptococcus	s__Streptococcus equinus ATCC 700338
ASV110343	15_denmark	0.002	20.9.2020	2020	Autumn	Denmark	Hjulby	55.3422	Oct.66	Male	Young	k__Bacteria	p__Campylobacterota	c__Campylobacteria	o__Campylobacterales	f__Campylobacteraceae	g__Campylobacter	s__Campylobacter jejuni subsp. jejuni LMG 23211
ASV111789	5_vantaa	0.002	2.9.2020	2020	Breeding	Finland	Lansinnatus	60.249	25.118	Female	Young	k__Bacteria	p__Actinobacteriota	c__Actinobacteria	o__Corynebacteriales	f__Mycobacteriaceae	g__Mycobacterium	s__
ASV112451	LV24	0.002	20.9.2020	2020	Autumn	Latvia	Pape	56.1625	21.0656	Male	Adult	k__Bacteria	p__Campylobacterota	c__Campylobacteria	o__Campylobacterales	f__Campylobacteraceae	g__Campylobacter	s__Campylobacter jejuni subsp. jejuni LMG 23211
ASV112708	16_denmark	0.002	22.9.2020	2020	Autumn	Denmark	Bagenkop	54.728	Oct.52	Male	Young	k__Bacteria	p__Proteobacteria	c__Gammaproteobacteria	o__Enterobacterales	f__Enterobacteriaceae	g__Escherichia-Shigella	s__Shigella dysenteriae
ASV113221	19_vantaa	0.002	13.10.2020	2020	Autumn	Finland	Lansinnatus	60.249	25.118	Male	Adult	k__Bacteria	p__Actinobacteriota	c__Actinobacteria	o__Corynebacteriales	f__Mycobacteriaceae	g__Mycobacterium	s__
ASV114386	2_vantaa	0.002	2.9.2020	2020	Breeding	Finland	Lansinnatus	60.249	25.118	Male	Young	k__Bacteria	p__Campylobacterota	c__Campylobacteria	o__Campylobacterales	f__Campylobacteraceae	g__Campylobacter	s__Campylobacter jejuni subsp. jejuni LMG 23269
ASV115930	2_denmark	0.002	11.7.2020	2020	Breeding	Denmark	Svendborg	55.0557	Oct.31	Male	Adult	k__Bacteria	p__Proteobacteria	c__Gammaproteobacteria	o__Pseudomonadales	f__Pseudomonadaceae	g__Pseudomonas	s__Pseudomonas lundensis
ASV116169	2_denmark	0.002	11.7.2020	2020	Breeding	Denmark	Svendborg	55.0557	Oct.31	Male	Adult	k__Bacteria	p__Proteobacteria	c__Gammaproteobacteria	o__Pseudomonadales	f__Pseudomonadaceae	g__Pseudomonas	s__Pseudomonas lundensis
ASV116878	A811018	0.002	26.3.2021	2021	Spring	Finland	Hanko	59.8283	22.9659	Female	Adult	k__Bacteria	p__Proteobacteria	c__Gammaproteobacteria	o__Enterobacterales	f__Enterobacteriaceae	g__Escherichia-Shigella	s__Escherichia albertii
ASV118622	A810984	0.002	23.3.2021	2021	Spring	Finland	Hanko	59.8283	22.9659	Female	Adult	k__Bacteria	p__Firmicutes	c__Bacilli	o__Bacillales	f__Bacillaceae	g__Bacillus	s__
ASV118817	14_vantaa	0.002	1.10.2020	2020	Autumn	Finland	Lansinnatus	60.249	25.118	Male	Adult	k__Bacteria	p__Campylobacterota	c__Campylobacteria	o__Campylobacterales	f__Campylobacteraceae	g__Campylobacter	s__Campylobacter jejuni subsp. jejuni HB93-13
ASV119324	A809585	0.002	11.8.2020	2020	Breeding	Finland	Hanko	59.8283	22.9659	Male	Young	k__Bacteria	p__Campylobacterota	c__Campylobacteria	o__Campylobacterales	f__Helicobacteraceae	g__Helicobacter	s__Helicobacter sp. 'B52D Seymour'
ASV120083	8A85329	0.002	5.8.2020	2020	Breeding	Denmark	Tinning Mose	56.266	9.957	Male	Young	k__Bacteria	p__Firmicutes	c__Clostridia	o__Clostridiales	f__Clostridiaceae	g__Clostridium sensu stricto 1	s__Clostridium perfringens NCTC 8239
ASV120349	A810988	0.002	24.3.2021	2021	Spring	Finland	Hanko	59.8283	22.9659	Male	Adult	k__Bacteria	p__Firmicutes	c__Bacilli	o__Mycoplasmatales	f__Mycoplasmataceae	g__Ureaplasma	s__
ASV122179	D27	0.002	27.5.2021	2021	Breeding	France	Chize forest	46.0951	0.4133	Female	Unknown	k__Bacteria	p__Firmicutes	c__Clostridia	o__Clostridiales	f__Clostridiaceae	g__Clostridium sensu stricto 1	s__Clostridium sp. Marseille-P2414
ASV123372	6_denmark	0.002	21.7.2020	2020	Breeding	Denmark	Svendborg	55.0557	Oct.31	Unknown	Young	k__Bacteria	p__Firmicutes	c__Bacilli	o__Staphylococcales	f__Staphylococcaceae	g__Staphylococcus	s__Staphylococcus agnetis
ASV125794	10_chize	0.002	20.5.2021	2021	Breeding	France	Chize forest	46.1578	0.4308	Male	Unknown	k__Bacteria	p__Firmicutes	c__Bacilli	o__Mycoplasmatales	f__Mycoplasmataceae	g__Ureaplasma	s__
ASV126279	1_vantaa	0.002	1.9.2020	2020	Breeding	Finland	Lansinnatus	60.249	25.118	Male	Young	k__Bacteria	p__Proteobacteria	c__Gammaproteobacteria	o__Enterobacterales	f__Yersiniaceae	g__Serratia	s__Serratia sp. Leaf51
ASV130321	3_denmark	0.002	11.7.2020	2020	Breeding	Denmark	Svendborg	55.0557	Oct.31	Female	Adult	k__Bacteria	p__Firmicutes	c__Bacilli	o__Lactobacillales	f__Streptococcaceae	g__Streptococcus	s__Streptococcus equinus ATCC 700338
ASV130450	3_denmark	0.002	11.7.2020	2020	Breeding	Denmark	Svendborg	55.0557	Oct.31	Female	Adult	k__Bacteria	p__Firmicutes	c__Bacilli	o__Lactobacillales	f__Streptococcaceae	g__Streptococcus	s__
ASV130788	9_denmark	0.002	21.7.2020	2020	Breeding	Denmark	Svendborg	55.0557	Oct.31	Female	Adult	k__Bacteria	p__Firmicutes	c__Clostridia	o__Clostridiales	f__Clostridiaceae	g__Clostridium sensu stricto 1	s__
ASV135806	LV24	0.002	20.9.2020	2020	Autumn	Latvia	Pape	56.1625	21.0656	Male	Adult	k__Bacteria	p__Campylobacterota	c__Campylobacteria	o__Campylobacterales	f__Campylobacteraceae	g__Campylobacter	s__Campylobacter sp. RM16704
ASV137555	A686068	0.002	5.10.2020	2020	Autumn	Finland	Karjaa	60.0715	23.662	Male	Young	k__Bacteria	p__Campylobacterota	c__Campylobacteria	o__Campylobacterales	f__Helicobacteraceae	g__Helicobacter	s__Helicobacter sp. 'B52D Seymour'
ASV137714	7_vantaa	0.002	2.9.2020	2020	Breeding	Finland	Lansinnatus	60.249	25.118	Male	Young	k__Bacteria	p__Proteobacteria	c__Gammaproteobacteria	o__Pseudomonadales	f__Pseudomonadaceae	g__Pseudomonas	s__Pseudomonas umsongensis
ASV141531	16_denmark	0.002	22.9.2020	2020	Autumn	Denmark	Bagenkop	54.728	Oct.52	Male	Young	k__Bacteria	p__Proteobacteria	c__Gammaproteobacteria	o__Enterobacterales	f__Enterobacteriaceae	g__Escherichia-Shigella	s__Escherichia albertii
ASV143003	A810991	0.002	25.3.2021	2021	Spring	Finland	Hanko	59.8283	22.9659	Male	Adult	k__Bacteria	p__Campylobacterota	c__Campylobacteria	o__Campylobacterales	f__Campylobacteraceae	g__Campylobacter	s__Campylobacter sp. RM16704
ASV143326	8A85322	0.002	20.7.2020	2020	Breeding	Denmark	Tinning Mose	56.266	9.957	Female	Adult	k__Bacteria	p__Proteobacteria	c__Gammaproteobacteria	o__Enterobacterales	f__Enterobacteriaceae	g__Escherichia-Shigella	s__Escherichia marmotae
ASV143721	LV18	0.002	19.9.2020	2020	Autumn	Latvia	Pape	56.1625	21.0656	Female	Adult	k__Bacteria	p__Proteobacteria	c__Gammaproteobacteria	o__Enterobacterales	f__Enterobacteriaceae	g__Escherichia-Shigella	s__Escherichia marmotae
ASV144060	A810920	0.002	12.8.2020	2020	Breeding	Finland	Hanko	59.8283	22.9659	Male	Young	k__Bacteria	p__Firmicutes	c__Bacilli	o__Mycoplasmatales	f__Mycoplasmataceae	g__Mycoplasma	s__Mycoplasma penetrans HF-2
ASV145601	LV45	0.002	30.9.2020	2020	Autumn	Latvia	Pape	56.1625	21.0656	Male	Young	k__Bacteria	p__Campylobacterota	c__Campylobacteria	o__Campylobacterales	f__Campylobacteraceae	g__Campylobacter	s__Campylobacter jejuni subsp. jejuni LMG 23269
ASV146344	A809585	0.002	11.8.2020	2020	Breeding	Finland	Hanko	59.8283	22.9659	Male	Young	k__Bacteria	p__Campylobacterota	c__Campylobacteria	o__Campylobacterales	f__Helicobacteraceae	g__Helicobacter	s__Helicobacter sp. 'B52D Seymour'
ASV147098	6_vantaa	0.002	2.9.2020	2020	Breeding	Finland	Lansinnatus	60.249	25.118	Male	Young	k__Bacteria	p__Proteobacteria	c__Gammaproteobacteria	o__Enterobacterales	f__Morganellaceae	g__Proteus	s__Proteus hauseri
ASV147990	8A85329	0.002	5.8.2020	2020	Breeding	Denmark	Tinning Mose	56.266	9.957	Male	Young	k__Bacteria	p__Firmicutes	c__Clostridia	o__Clostridiales	f__Clostridiaceae	g__Clostridium sensu stricto 1	s__Clostridium perfringens
ASV149651	6_denmark	0.002	21.7.2020	2020	Breeding	Denmark	Svendborg	55.0557	Oct.31	Unknown	Young	k__Bacteria	p__Proteobacteria	c__Gammaproteobacteria	o__Enterobacterales	f__Enterobacteriaceae	g__Escherichia-Shigella	s__Escherichia coli
ASV151515	1_denmark	0.002	11.7.2020	2020	Breeding	Denmark	Svendborg	55.0557	Oct.31	Male	Adult	k__Bacteria	p__Proteobacteria	c__Gammaproteobacteria	o__Pseudomonadales	f__Pseudomonadaceae	g__Pseudomonas	s__Pseudomonas antarctica
ASV152520	9_denmark	0.002	21.7.2020	2020	Breeding	Denmark	Svendborg	55.0557	Oct.31	Female	Adult	k__Bacteria	p__Firmicutes	c__Bacilli	o__Bacillales	f__Bacillaceae	g__Bacillus	s__Bacillus butanolivorans
ASV153780	6_denmark	0.002	21.7.2020	2020	Breeding	Denmark	Svendborg	55.0557	Oct.31	Unknown	Young	k__Bacteria	p__Firmicutes	c__Bacilli	o__Mycoplasmatales	f__Mycoplasmataceae	g__Mycoplasma	s__Mycoplasma penetrans HF-2
ASV155305	8A85322	0.002	20.7.2020	2020	Breeding	Denmark	Tinning Mose	56.266	9.957	Female	Adult	k__Bacteria	p__Campylobacterota	c__Campylobacteria	o__Campylobacterales	f__Campylobacteraceae	g__Campylobacter	s__Campylobacter jejuni subsp. jejuni LMG 23211
ASV156520	2_vantaa	0.002	2.9.2020	2020	Breeding	Finland	Lansinnatus	60.249	25.118	Male	Young	k__Bacteria	p__Proteobacteria	c__Gammaproteobacteria	o__Enterobacterales	f__Enterobacteriaceae	g__Escherichia-Shigella	s__Escherichia coli
ASV157022	A810986	0.002	24.3.2021	2021	Spring	Finland	Hanko	59.8283	22.9659	Female	Adult	k__Bacteria	p__Proteobacteria	c__Gammaproteobacteria	o__Enterobacterales	f__Enterobacteriaceae	g__Escherichia-Shigella	s__Escherichia marmotae
ASV157272	15_denmark	0.002	20.9.2020	2020	Autumn	Denmark	Hjulby	55.3422	Oct.66	Male	Young	k__Bacteria	p__Campylobacterota	c__Campylobacteria	o__Campylobacterales	f__Campylobacteraceae	g__Campylobacter	s__Campylobacter jejuni subsp. jejuni LMG 23211
ASV158679	9_denmark	0.002	21.7.2020	2020	Breeding	Denmark	Svendborg	55.0557	Oct.31	Female	Adult	k__Bacteria	p__Actinobacteriota	c__Actinobacteria	o__Corynebacteriales	f__Mycobacteriaceae	g__Mycobacterium	s__
ASV158718	8_denmark	0.002	21.7.2020	2020	Breeding	Denmark	Svendborg	55.0557	Oct.31	Male	Young	k__Bacteria	p__Proteobacteria	c__Gammaproteobacteria	o__Pseudomonadales	f__Pseudomonadaceae	g__Pseudomonas	s__Pseudomonas oryzihabitans
ASV159586	LV02	0.002	21.8.2020	2020	Breeding	Latvia	Pape	56.1625	21.0656	Female	Young	k__Bacteria	p__Proteobacteria	c__Gammaproteobacteria	o__Enterobacterales	f__Enterobacteriaceae	g__Escherichia-Shigella	s__Escherichia albertii
ASV160848	A811018	0.002	26.3.2021	2021	Spring	Finland	Hanko	59.8283	22.9659	Female	Adult	k__Bacteria	p__Proteobacteria	c__Gammaproteobacteria	o__Enterobacterales	f__Enterobacteriaceae	g__Escherichia-Shigella	s__Escherichia coli S88
ASV161102	3_denmark	0.002	11.7.2020	2020	Breeding	Denmark	Svendborg	55.0557	Oct.31	Female	Adult	k__Bacteria	p__Firmicutes	c__Bacilli	o__Lactobacillales	f__Streptococcaceae	g__Streptococcus	s__Streptococcus equinus ATCC 700338
ASV164206	A810987	0.002	24.3.2021	2021	Spring	Finland	Hanko	59.8283	22.9659	Male	Adult	k__Bacteria	p__Actinobacteriota	c__Actinobacteria	o__Corynebacteriales	f__Mycobacteriaceae	g__Mycobacterium	s__
ASV165381	1_denmark	0.002	11.7.2020	2020	Breeding	Denmark	Svendborg	55.0557	Oct.31	Male	Adult	k__Bacteria	p__Proteobacteria	c__Gammaproteobacteria	o__Enterobacterales	f__Enterobacteriaceae	g__Citrobacter	s__Citrobacter werkmanii
ASV165980	6_vantaa	0.002	2.9.2020	2020	Breeding	Finland	Lansinnatus	60.249	25.118	Male	Young	k__Bacteria	p__Proteobacteria	c__Gammaproteobacteria	o__Enterobacterales	f__Morganellaceae	g__Proteus	s__Proteus hauseri
ASV167308	15_denmark	0.002	20.9.2020	2020	Autumn	Denmark	Hjulby	55.3422	Oct.66	Male	Young	k__Bacteria	p__Campylobacterota	c__Campylobacteria	o__Campylobacterales	f__Campylobacteraceae	g__Campylobacter	s__Campylobacter jejuni subsp. jejuni LMG 23211
ASV168307	1_vantaa	0.002	1.9.2020	2020	Breeding	Finland	Lansinnatus	60.249	25.118	Male	Young	k__Bacteria	p__Proteobacteria	c__Gammaproteobacteria	o__Pseudomonadales	f__Pseudomonadaceae	g__Pseudomonas	s__Pseudomonas sp. NC02
ASV168871	8A85322	0.002	20.7.2020	2020	Breeding	Denmark	Tinning Mose	56.266	9.957	Female	Adult	k__Bacteria	p__Campylobacterota	c__Campylobacteria	o__Campylobacterales	f__Campylobacteraceae	g__Campylobacter	s__Campylobacter helveticus
ASV169744	A810987	0.002	24.3.2021	2021	Spring	Finland	Hanko	59.8283	22.9659	Male	Adult	k__Bacteria	p__Firmicutes	c__Clostridia	o__Clostridiales	f__Clostridiaceae	g__Clostridium sensu stricto 1	s__Clostridium sp. Marseille-P2414
ASV169745	12_denmark	0.002	16.8.2020	2020	Breeding	Denmark	Bagenkop	54.728	Oct.52	Unknown	Young	k__Bacteria	p__Proteobacteria	c__Gammaproteobacteria	o__Pseudomonadales	f__Pseudomonadaceae	g__Pseudomonas	s__Pseudomonas lurida
ASV172986	A686083	0.002	25.9.2020	2020	Autumn	Finland	Karjaa	60.0715	23.662	Male	Young	k__Bacteria	p__Campylobacterota	c__Campylobacteria	o__Campylobacterales	f__Helicobacteraceae	g__Helicobacter	s__Helicobacter sp. 'B52D Seymour'
ASV173123	9_denmark	0.002	21.7.2020	2020	Breeding	Denmark	Svendborg	55.0557	Oct.31	Female	Adult	k__Bacteria	p__Firmicutes	c__Bacilli	o__Bacillales	f__Bacillaceae	g__Bacillus	s__Bacillus longiquaesitum
ASV173283	16_denmark	0.002	22.9.2020	2020	Autumn	Denmark	Bagenkop	54.728	Oct.52	Male	Young	k__Bacteria	p__Proteobacteria	c__Gammaproteobacteria	o__Enterobacterales	f__Enterobacteriaceae	g__Escherichia-Shigella	s__Escherichia coli 042
ASV175730	8A85329	0.002	5.8.2020	2020	Breeding	Denmark	Tinning Mose	56.266	9.957	Male	Young	k__Bacteria	p__Proteobacteria	c__Gammaproteobacteria	o__Enterobacterales	f__Enterobacteriaceae	g__Escherichia-Shigella	s__Escherichia coli
ASV176117	VD_01	0.002	27.7.2020	2020	Breeding	Denmark	Tinning Mose	56.266	9.957	Female	Young	k__Bacteria	p__Firmicutes	c__Bacilli	o__Mycoplasmatales	f__Mycoplasmataceae	g__Mycoplasma	s__Mycoplasma penetrans HF-2
ASV177252	A810983	0.002	23.3.2021	2021	Spring	Finland	Hanko	59.8283	22.9659	Male	Adult	k__Bacteria	p__Campylobacterota	c__Campylobacteria	o__Campylobacterales	f__Campylobacteraceae	g__Campylobacter	s__Campylobacter jejuni
ASV178981	11_denmark	0.002	1.8.2020	2020	Breeding	Denmark	Svendborg	55.0557	Oct.31	Male	Adult	k__Bacteria	p__Proteobacteria	c__Gammaproteobacteria	o__Enterobacterales	f__Enterobacteriaceae	g__Escherichia-Shigella	s__Escherichia albertii
ASV179088	3_denmark	0.002	11.7.2020	2020	Breeding	Denmark	Svendborg	55.0557	Oct.31	Female	Adult	k__Bacteria	p__Firmicutes	c__Bacilli	o__Lactobacillales	f__Streptococcaceae	g__Streptococcus	s__Streptococcus equinus ATCC 700338
ASV179879	A810986	0.002	24.3.2021	2021	Spring	Finland	Hanko	59.8283	22.9659	Female	Adult	k__Bacteria	p__Proteobacteria	c__Gammaproteobacteria	o__Enterobacterales	f__Enterobacteriaceae	g__Escherichia-Shigella	s__Escherichia marmotae
ASV180211	D13	0.002	18.5.2021	2021	Breeding	France	Chize forest	46.1126	0.4495	Male	Unknown	k__Bacteria	p__Firmicutes	c__Bacilli	o__Mycoplasmatales	f__Mycoplasmataceae	g__Ureaplasma	s__
ASV180452	3_denmark	0.002	11.7.2020	2020	Breeding	Denmark	Svendborg	55.0557	Oct.31	Female	Adult	k__Bacteria	p__Actinobacteriota	c__Actinobacteria	o__Corynebacteriales	f__Mycobacteriaceae	g__Mycobacterium	s__
ASV180878	6_denmark	0.002	21.7.2020	2020	Breeding	Denmark	Svendborg	55.0557	Oct.31	Unknown	Young	k__Bacteria	p__Proteobacteria	c__Gammaproteobacteria	o__Pseudomonadales	f__Pseudomonadaceae	g__Pseudomonas	s__Pseudomonas sp. S09G 359
ASV181360	D15	0.002	18.5.2021	2021	Breeding	France	Chize forest	46.1319	0.4387	Male	Unknown	k__Bacteria	p__Firmicutes	c__Bacilli	o__Mycoplasmatales	f__Mycoplasmataceae	g__Mycoplasma	s__Malacoplasma microti
ASV182889	13_vantaa	0.002	1.10.2020	2020	Autumn	Finland	Lansinnatus	60.249	25.118	Male	Adult	k__Bacteria	p__Actinobacteriota	c__Actinobacteria	o__Corynebacteriales	f__Corynebacteriaceae	g__Corynebacterium	s__
ASV184685	A686068	0.002	5.10.2020	2020	Autumn	Finland	Karjaa	60.0715	23.662	Male	Young	k__Bacteria	p__Campylobacterota	c__Campylobacteria	o__Campylobacterales	f__Campylobacteraceae	g__Campylobacter	s__Campylobacter jejuni subsp. jejuni LMG 23211
ASV184696	LV45	0.002	30.9.2020	2020	Autumn	Latvia	Pape	56.1625	21.0656	Male	Young	k__Bacteria	p__Campylobacterota	c__Campylobacteria	o__Campylobacterales	f__Campylobacteraceae	g__Campylobacter	s__Campylobacter jejuni subsp. jejuni LMG 23357
ASV184738	A686083	0.002	25.9.2020	2020	Autumn	Finland	Karjaa	60.0715	23.662	Male	Young	k__Bacteria	p__Proteobacteria	c__Gammaproteobacteria	o__Enterobacterales	f__Yersiniaceae	g__Serratia	s__Serratia sp. 3ACOL1
ASV184903	3_denmark	0.002	11.7.2020	2020	Breeding	Denmark	Svendborg	55.0557	Oct.31	Female	Adult	k__Bacteria	p__Firmicutes	c__Bacilli	o__Mycoplasmatales	f__Mycoplasmataceae	g__Mycoplasma	s__Mycoplasma penetrans HF-2
ASV186216	D26	0.002	20.5.2021	2021	Breeding	France	Chize forest	46.0979	0.4134	Female	Unknown	k__Bacteria	p__Firmicutes	c__Bacilli	o__Lactobacillales	f__Enterococcaceae	g__Enterococcus	s__
ASV186577	A810987	0.002	24.3.2021	2021	Spring	Finland	Hanko	59.8283	22.9659	Male	Adult	k__Bacteria	p__Firmicutes	c__Clostridia	o__Clostridiales	f__Clostridiaceae	g__Clostridium sensu stricto 1	s__Clostridium sp. Marseille-P2414
ASV186825	9_denmark	0.002	21.7.2020	2020	Breeding	Denmark	Svendborg	55.0557	Oct.31	Female	Adult	k__Bacteria	p__Firmicutes	c__Clostridia	o__Clostridiales	f__Clostridiaceae	g__Clostridium sensu stricto 1	s__
ASV189002	3_denmark	0.002	11.7.2020	2020	Breeding	Denmark	Svendborg	55.0557	Oct.31	Female	Adult	k__Bacteria	p__Firmicutes	c__Clostridia	o__Clostridiales	f__Clostridiaceae	g__Clostridium sensu stricto 1	s__Clostridium gasigenes
ASV189014	8A85329	0.002	5.8.2020	2020	Breeding	Denmark	Tinning Mose	56.266	9.957	Male	Young	k__Bacteria	p__Proteobacteria	c__Gammaproteobacteria	o__Pseudomonadales	f__Pseudomonadaceae	g__Pseudomonas	s__Pseudomonas versuta
ASV189133	D28	0.002	31.5.2021	2021	Breeding	France	Chize forest	46.1201	0.4585	Male	Unknown	k__Bacteria	p__Firmicutes	c__Bacilli	o__Mycoplasmatales	f__Mycoplasmataceae	g__Mycoplasma	s__Malacoplasma microti
ASV190161	12_denmark	0.002	16.8.2020	2020	Breeding	Denmark	Bagenkop	54.728	Oct.52	Unknown	Young	k__Bacteria	p__Proteobacteria	c__Gammaproteobacteria	o__Pseudomonadales	f__Pseudomonadaceae	g__Pseudomonas	s__Pseudomonas sp. MYb193
ASV190266	7_denmark	0.002	21.7.2020	2020	Breeding	Denmark	Svendborg	55.0557	Oct.31	Female	Adult	k__Bacteria	p__Proteobacteria	c__Gammaproteobacteria	o__Pseudomonadales	f__Moraxellaceae	g__Acinetobacter	s__
ASV190503	16_denmark	0.002	22.9.2020	2020	Autumn	Denmark	Bagenkop	54.728	Oct.52	Male	Young	k__Bacteria	p__Proteobacteria	c__Gammaproteobacteria	o__Enterobacterales	f__Enterobacteriaceae	g__Escherichia-Shigella	s__Escherichia coli
ASV190534	VD_01	0.002	27.7.2020	2020	Breeding	Denmark	Tinning Mose	56.266	9.957	Female	Young	k__Bacteria	p__Firmicutes	c__Bacilli	o__Mycoplasmatales	f__Mycoplasmataceae	g__Mycoplasma	s__Malacoplasma microti
ASV191440	1_vantaa	0.002	1.9.2020	2020	Breeding	Finland	Lansinnatus	60.249	25.118	Male	Young	k__Bacteria	p__Proteobacteria	c__Gammaproteobacteria	o__Pseudomonadales	f__Pseudomonadaceae	g__Pseudomonas	s__Pseudomonas fulva 12-X
ASV191989	9_denmark	0.002	21.7.2020	2020	Breeding	Denmark	Svendborg	55.0557	Oct.31	Female	Adult	k__Bacteria	p__Firmicutes	c__Clostridia	o__Clostridiales	f__Clostridiaceae	g__Clostridium sensu stricto 1	s__
ASV192403	D15	0.002	18.5.2021	2021	Breeding	France	Chize forest	46.1319	0.4387	Male	Unknown	k__Bacteria	p__Firmicutes	c__Bacilli	o__Mycoplasmatales	f__Mycoplasmataceae	g__Mycoplasma	s__Malacoplasma microti
ASV192538	8E13246	0.002	Unknown	2020	NA	Denmark	Tinning Mose	56.266	9.957	Female	Adult	k__Bacteria	p__Proteobacteria	c__Gammaproteobacteria	o__Enterobacterales	f__Enterobacteriaceae	g__Escherichia-Shigella	s__Escherichia marmotae
ASV194373	A811018	0.002	26.3.2021	2021	Spring	Finland	Hanko	59.8283	22.9659	Female	Adult	k__Bacteria	p__Proteobacteria	c__Gammaproteobacteria	o__Enterobacterales	f__Enterobacteriaceae	g__Escherichia-Shigella	s__Streptomyces sp. Q1
ASV194768	2_vantaa	0.002	2.9.2020	2020	Breeding	Finland	Lansinnatus	60.249	25.118	Male	Young	k__Bacteria	p__Proteobacteria	c__Gammaproteobacteria	o__Enterobacterales	f__Enterobacteriaceae	g__Escherichia-Shigella	s__Escherichia coli
ASV195621	8A85329	0.002	5.8.2020	2020	Breeding	Denmark	Tinning Mose	56.266	9.957	Male	Young	k__Bacteria	p__Proteobacteria	c__Gammaproteobacteria	o__Enterobacterales	f__Aeromonadaceae	g__Aeromonas	s__
ASV195667	LV02	0.002	21.8.2020	2020	Breeding	Latvia	Pape	56.1625	21.0656	Female	Young	k__Bacteria	p__Proteobacteria	c__Gammaproteobacteria	o__Enterobacterales	f__Enterobacteriaceae	g__Escherichia-Shigella	s__Escherichia albertii
ASV196092	A686081	0.002	24.9.2020	2020	Autumn	Finland	Karjaa	60.0715	23.662	Male	Young	k__Bacteria	p__Campylobacterota	c__Campylobacteria	o__Campylobacterales	f__Campylobacteraceae	g__Campylobacter	s__Campylobacter jejuni subsp. jejuni LMG 23211
ASV197298	6_denmark	0.002	21.7.2020	2020	Breeding	Denmark	Svendborg	55.0557	Oct.31	Unknown	Young	k__Bacteria	p__Firmicutes	c__Bacilli	o__Staphylococcales	f__Staphylococcaceae	g__Staphylococcus	s__Staphylococcus agnetis
ASV198347	A810982	0.002	22.3.2021	2021	Spring	Finland	Hanko	59.8283	22.9659	Male	Adult	k__Bacteria	p__Proteobacteria	c__Gammaproteobacteria	o__Enterobacterales	f__Enterobacteriaceae	g__Escherichia-Shigella	s__Escherichia marmotae
ASV201113	11_denmark	0.002	1.8.2020	2020	Breeding	Denmark	Svendborg	55.0557	Oct.31	Male	Adult	k__Bacteria	p__Proteobacteria	c__Gammaproteobacteria	o__Pseudomonadales	f__Pseudomonadaceae	g__Pseudomonas	s__Pseudomonas sp. FDAARGOS_380
ASV201360	19_vantaa	0.002	13.10.2020	2020	Autumn	Finland	Lansinnatus	60.249	25.118	Male	Adult	k__Bacteria	p__Proteobacteria	c__Gammaproteobacteria	o__Enterobacterales	f__Yersiniaceae	g__Serratia	s__Serratia fonticola
ASV201543	8A85286	0.002	19.8.2020	2020	Breeding	Denmark	Tinning Mose	56.266	9.957	Male	Young	k__Bacteria	p__Proteobacteria	c__Gammaproteobacteria	o__Pseudomonadales	f__Pseudomonadaceae	g__Pseudomonas	s__Pseudomonas sp. FDAARGOS_380
ASV204603	1_vantaa	0.002	1.9.2020	2020	Breeding	Finland	Lansinnatus	60.249	25.118	Male	Young	k__Bacteria	p__Proteobacteria	c__Gammaproteobacteria	o__Pseudomonadales	f__Pseudomonadaceae	g__Pseudomonas	s__
ASV205409	A810982	0.002	22.3.2021	2021	Spring	Finland	Hanko	59.8283	22.9659	Male	Adult	k__Bacteria	p__Proteobacteria	c__Gammaproteobacteria	o__Enterobacterales	f__Enterobacteriaceae	g__Escherichia-Shigella	s__Escherichia marmotae
ASV205878	8_denmark	0.002	21.7.2020	2020	Breeding	Denmark	Svendborg	55.0557	Oct.31	Male	Young	k__Bacteria	p__Proteobacteria	c__Gammaproteobacteria	o__Pseudomonadales	f__Pseudomonadaceae	g__Pseudomonas	s__Pseudomonas oryzihabitans
ASV206089	11_denmark	0.002	1.8.2020	2020	Breeding	Denmark	Svendborg	55.0557	Oct.31	Male	Adult	k__Bacteria	p__Proteobacteria	c__Gammaproteobacteria	o__Pseudomonadales	f__Pseudomonadaceae	g__Pseudomonas	s__Pseudomonas sp. NC02
ASV206782	12_denmark	0.002	16.8.2020	2020	Breeding	Denmark	Bagenkop	54.728	Oct.52	Unknown	Young	k__Bacteria	p__Firmicutes	c__Bacilli	o__Bacillales	f__Bacillaceae	g__Bacillus	s__Bacillus sp. IDA4917
ASV208085	1_vantaa	0.002	1.9.2020	2020	Breeding	Finland	Lansinnatus	60.249	25.118	Male	Young	k__Bacteria	p__Proteobacteria	c__Gammaproteobacteria	o__Burkholderiales	f__Burkholderiaceae	g__Burkholderia-Caballeronia-Paraburkholderia	s__Caballeronia terrestris
ASV210643	12_denmark	0.002	16.8.2020	2020	Breeding	Denmark	Bagenkop	54.728	Oct.52	Unknown	Young	k__Bacteria	p__Firmicutes	c__Clostridia	o__Clostridiales	f__Clostridiaceae	g__Clostridium sensu stricto 1	s__Clostridium perfringens
ASV213709	8_denmark	0.002	21.7.2020	2020	Breeding	Denmark	Svendborg	55.0557	Oct.31	Male	Young	k__Bacteria	p__Proteobacteria	c__Gammaproteobacteria	o__Pseudomonadales	f__Pseudomonadaceae	g__Pseudomonas	s__Pseudomonas lurida
ASV214294	A686068	0.002	5.10.2020	2020	Autumn	Finland	Karjaa	60.0715	23.662	Male	Young	k__Bacteria	p__Campylobacterota	c__Campylobacteria	o__Campylobacterales	f__Campylobacteraceae	g__Campylobacter	s__Campylobacter jejuni subsp. jejuni LMG 23211
ASV214810	A810991	0.002	25.3.2021	2021	Spring	Finland	Hanko	59.8283	22.9659	Male	Adult	k__Bacteria	p__Campylobacterota	c__Campylobacteria	o__Campylobacterales	f__Campylobacteraceae	g__Campylobacter	s__Campylobacter jejuni
ASV214875	A810991	0.002	25.3.2021	2021	Spring	Finland	Hanko	59.8283	22.9659	Male	Adult	k__Bacteria	p__Campylobacterota	c__Campylobacteria	o__Campylobacterales	f__Campylobacteraceae	g__Campylobacter	s__Campylobacter sp. RM16704
ASV215224	19_vantaa	0.002	13.10.2020	2020	Autumn	Finland	Lansinnatus	60.249	25.118	Male	Adult	k__Bacteria	p__Proteobacteria	c__Gammaproteobacteria	o__Pseudomonadales	f__Pseudomonadaceae	g__Pseudomonas	s__
ASV216098	12_denmark	0.002	16.8.2020	2020	Breeding	Denmark	Bagenkop	54.728	Oct.52	Unknown	Young	k__Bacteria	p__Firmicutes	c__Clostridia	o__Clostridiales	f__Clostridiaceae	g__Clostridium sensu stricto 1	s__Clostridium sp. Marseille-P2414
ASV216217	9_vantaa	0.002	14.9.2020	2020	Breeding	Finland	Lansinnatus	60.249	25.118	Female	Young	k__Bacteria	p__Proteobacteria	c__Gammaproteobacteria	o__Enterobacterales	f__Enterobacteriaceae	g__Escherichia-Shigella	s__Escherichia marmotae
ASV217212	A686067	0.002	31.5.2020	2020	Breeding	Finland	Karjaa	60.0715	23.662	Male	Adult	k__Bacteria	p__Firmicutes	c__Clostridia	o__Clostridiales	f__Clostridiaceae	g__Clostridium sensu stricto 1	s__Clostridium perfringens
ASV218700	11_denmark	0.002	1.8.2020	2020	Breeding	Denmark	Svendborg	55.0557	Oct.31	Male	Adult	k__Bacteria	p__Proteobacteria	c__Gammaproteobacteria	o__Pseudomonadales	f__Pseudomonadaceae	g__Pseudomonas	s__Pseudomonas migulae
ASV219942	LV36	0.002	28.9.2020	2020	Autumn	Latvia	Pape	56.1625	21.0656	Female	Young	k__Bacteria	p__Proteobacteria	c__Gammaproteobacteria	o__Enterobacterales	f__Enterobacteriaceae	g__Escherichia-Shigella	s__Escherichia marmotae
ASV220404	8A85322	0.002	20.7.2020	2020	Breeding	Denmark	Tinning Mose	56.266	9.957	Female	Adult	k__Bacteria	p__Firmicutes	c__Clostridia	o__Clostridiales	f__Clostridiaceae	g__Clostridium sensu stricto 1	s__Clostridium sp. Marseille-P2414
ASV221002	A686067	0.002	31.5.2020	2020	Breeding	Finland	Karjaa	60.0715	23.662	Male	Adult	k__Bacteria	p__Campylobacterota	c__Campylobacteria	o__Campylobacterales	f__Campylobacteraceae	g__Campylobacter	s__Campylobacter sp. RM16704
ASV222208	A686083	0.002	25.9.2020	2020	Autumn	Finland	Karjaa	60.0715	23.662	Male	Young	k__Bacteria	p__Campylobacterota	c__Campylobacteria	o__Campylobacterales	f__Helicobacteraceae	g__Helicobacter	s__Helicobacter sp. 'B52D Seymour'
ASV222240	8E13246	0.002	Unknown	2020	NA	Denmark	Tinning Mose	56.266	9.957	Female	Adult	k__Bacteria	p__Proteobacteria	c__Gammaproteobacteria	o__Enterobacterales	f__Enterobacteriaceae	g__Escherichia-Shigella	s__Escherichia marmotae
ASV222974	16_denmark	0.002	22.9.2020	2020	Autumn	Denmark	Bagenkop	54.728	Oct.52	Male	Young	k__Bacteria	p__Proteobacteria	c__Gammaproteobacteria	o__Enterobacterales	f__Enterobacteriaceae	g__Escherichia-Shigella	s__Escherichia albertii
ASV223133	VD_01	0.002	27.7.2020	2020	Breeding	Denmark	Tinning Mose	56.266	9.957	Female	Young	k__Bacteria	p__Firmicutes	c__Bacilli	o__Mycoplasmatales	f__Mycoplasmataceae	g__Mycoplasma	s__Mycoplasma penetrans HF-2
ASV224585	A686068	0.002	5.10.2020	2020	Autumn	Finland	Karjaa	60.0715	23.662	Male	Young	k__Bacteria	p__Campylobacterota	c__Campylobacteria	o__Campylobacterales	f__Campylobacteraceae	g__Campylobacter	s__Campylobacter jejuni subsp. jejuni LMG 23211
ASV226410	A810987	0.002	24.3.2021	2021	Spring	Finland	Hanko	59.8283	22.9659	Male	Adult	k__Bacteria	p__Firmicutes	c__Clostridia	o__Clostridiales	f__Clostridiaceae	g__Clostridium sensu stricto 1	s__Clostridium sp. Marseille-P2414
ASV226818	12_denmark	0.002	16.8.2020	2020	Breeding	Denmark	Bagenkop	54.728	Oct.52	Unknown	Young	k__Bacteria	p__Proteobacteria	c__Gammaproteobacteria	o__Pseudomonadales	f__Pseudomonadaceae	g__Pseudomonas	s__Pseudomonas sp. FDAARGOS_380
ASV227164	8_denmark	0.002	21.7.2020	2020	Breeding	Denmark	Svendborg	55.0557	Oct.31	Male	Young	k__Bacteria	p__Proteobacteria	c__Gammaproteobacteria	o__Pseudomonadales	f__Pseudomonadaceae	g__Pseudomonas	s__Pseudomonas versuta
ASV227642	8_denmark	0.002	21.7.2020	2020	Breeding	Denmark	Svendborg	55.0557	Oct.31	Male	Young	k__Bacteria	p__Proteobacteria	c__Gammaproteobacteria	o__Pseudomonadales	f__Pseudomonadaceae	g__Pseudomonas	s__Pseudomonas sp. bs2935
ASV229500	19_vantaa	0.002	13.10.2020	2020	Autumn	Finland	Lansinnatus	60.249	25.118	Male	Adult	k__Bacteria	p__Proteobacteria	c__Gammaproteobacteria	o__Enterobacterales	f__Yersiniaceae	g__Yersinia	s__Yersinia aldovae 670-83
ASV233844	A810920	0.002	12.8.2020	2020	Breeding	Finland	Hanko	59.8283	22.9659	Male	Young	k__Bacteria	p__Proteobacteria	c__Gammaproteobacteria	o__Enterobacterales	f__Enterobacteriaceae	g__Escherichia-Shigella	s__Escherichia coli
ASV234936	A810994	0.002	26.3.2021	2021	Spring	Finland	Hanko	59.8283	22.9659	Female	Adult	k__Bacteria	p__Proteobacteria	c__Gammaproteobacteria	o__Enterobacterales	f__Enterobacteriaceae	g__Escherichia-Shigella	s__Escherichia marmotae
ASV236623	A810986	0.002	24.3.2021	2021	Spring	Finland	Hanko	59.8283	22.9659	Female	Adult	k__Bacteria	p__Proteobacteria	c__Gammaproteobacteria	o__Enterobacterales	f__Enterobacteriaceae	g__Escherichia-Shigella	s__Escherichia marmotae
ASV239713	A810984	0.002	23.3.2021	2021	Spring	Finland	Hanko	59.8283	22.9659	Female	Adult	k__Bacteria	p__Campylobacterota	c__Campylobacteria	o__Campylobacterales	f__Campylobacteraceae	g__Campylobacter	s__Campylobacter sp. RM16704
ASV239995	1_vantaa	0.002	1.9.2020	2020	Breeding	Finland	Lansinnatus	60.249	25.118	Male	Young	k__Bacteria	p__Proteobacteria	c__Gammaproteobacteria	o__Pseudomonadales	f__Pseudomonadaceae	g__Pseudomonas	s__Pseudomonas sp. StFLB209
ASV241421	16_denmark	0.002	22.9.2020	2020	Autumn	Denmark	Bagenkop	54.728	Oct.52	Male	Young	k__Bacteria	p__Proteobacteria	c__Gammaproteobacteria	o__Enterobacterales	f__Enterobacteriaceae	g__Escherichia-Shigella	s__Escherichia coli
ASV241729	A811018	0.002	26.3.2021	2021	Spring	Finland	Hanko	59.8283	22.9659	Female	Adult	k__Bacteria	p__Proteobacteria	c__Gammaproteobacteria	o__Enterobacterales	f__Enterobacteriaceae	g__Escherichia-Shigella	s__Escherichia coli
ASV242042	2_vantaa	0.002	2.9.2020	2020	Breeding	Finland	Lansinnatus	60.249	25.118	Male	Young	k__Bacteria	p__Campylobacterota	c__Campylobacteria	o__Campylobacterales	f__Campylobacteraceae	g__Campylobacter	s__Campylobacter jejuni subsp. jejuni LMG 23269
ASV242238	8A85322	0.002	20.7.2020	2020	Breeding	Denmark	Tinning Mose	56.266	9.957	Female	Adult	k__Bacteria	p__Proteobacteria	c__Gammaproteobacteria	o__Enterobacterales	f__Enterobacteriaceae	g__Escherichia-Shigella	s__Escherichia marmotae
ASV244437	3_denmark	0.002	11.7.2020	2020	Breeding	Denmark	Svendborg	55.0557	Oct.31	Female	Adult	k__Bacteria	p__Proteobacteria	c__Gammaproteobacteria	o__Enterobacterales	f__Enterobacteriaceae	g__Escherichia-Shigella	s__
ASV246525	14_vantaa	0.002	1.10.2020	2020	Autumn	Finland	Lansinnatus	60.249	25.118	Male	Adult	k__Bacteria	p__Campylobacterota	c__Campylobacteria	o__Campylobacterales	f__Campylobacteraceae	g__Campylobacter	s__Campylobacter jejuni subsp. jejuni LMG 23211
ASV246936	VD_01	0.002	27.7.2020	2020	Breeding	Denmark	Tinning Mose	56.266	9.957	Female	Young	k__Bacteria	p__Campylobacterota	c__Campylobacteria	o__Campylobacterales	f__Campylobacteraceae	g__Campylobacter	s__Campylobacter sp. RM16704
ASV247064	A810982	0.002	22.3.2021	2021	Spring	Finland	Hanko	59.8283	22.9659	Male	Adult	k__Bacteria	p__Proteobacteria	c__Gammaproteobacteria	o__Enterobacterales	f__Enterobacteriaceae	g__Escherichia-Shigella	s__Escherichia marmotae
ASV247365	D28	0.002	31.5.2021	2021	Breeding	France	Chize forest	46.1201	0.4585	Male	Unknown	k__Bacteria	p__Firmicutes	c__Bacilli	o__Mycoplasmatales	f__Mycoplasmataceae	g__Mycoplasma	s__Malacoplasma microti
ASV247589	7_denmark	0.002	21.7.2020	2020	Breeding	Denmark	Svendborg	55.0557	Oct.31	Female	Adult	k__Bacteria	p__Firmicutes	c__Bacilli	o__Staphylococcales	f__Staphylococcaceae	g__Staphylococcus	s__Staphylococcus agnetis
ASV247976	1_vantaa	0.002	1.9.2020	2020	Breeding	Finland	Lansinnatus	60.249	25.118	Male	Young	k__Bacteria	p__Proteobacteria	c__Gammaproteobacteria	o__Pseudomonadales	f__Pseudomonadaceae	g__Pseudomonas	s__
ASV248199	LV30	0.002	25.9.2020	2020	Autumn	Latvia	Pape	56.1625	21.0656	Female	Young	k__Bacteria	p__Proteobacteria	c__Gammaproteobacteria	o__Enterobacterales	f__Enterobacteriaceae	g__Escherichia-Shigella	s__Escherichia marmotae
ASV249474	8A85329	0.002	5.8.2020	2020	Breeding	Denmark	Tinning Mose	56.266	9.957	Male	Young	k__Bacteria	p__Proteobacteria	c__Gammaproteobacteria	o__Enterobacterales	f__Enterobacteriaceae	g__Escherichia-Shigella	s__Escherichia marmotae
ASV250365	1_vantaa	0.002	1.9.2020	2020	Breeding	Finland	Lansinnatus	60.249	25.118	Male	Young	k__Bacteria	p__Proteobacteria	c__Gammaproteobacteria	o__Pseudomonadales	f__Pseudomonadaceae	g__Pseudomonas	s__Pseudomonas sp. R-41805
ASV250651	8_denmark	0.002	21.7.2020	2020	Breeding	Denmark	Svendborg	55.0557	Oct.31	Male	Young	k__Bacteria	p__Proteobacteria	c__Gammaproteobacteria	o__Pseudomonadales	f__Pseudomonadaceae	g__Pseudomonas	s__Pseudomonas sp. FDAARGOS_380
ASV250672	LV45	0.002	30.9.2020	2020	Autumn	Latvia	Pape	56.1625	21.0656	Male	Young	k__Bacteria	p__Proteobacteria	c__Gammaproteobacteria	o__Pseudomonadales	f__Pseudomonadaceae	g__Pseudomonas	s__Pseudomonas sp. TKP
ASV252189	A810987	0.002	24.3.2021	2021	Spring	Finland	Hanko	59.8283	22.9659	Male	Adult	k__Bacteria	p__Firmicutes	c__Clostridia	o__Clostridiales	f__Clostridiaceae	g__Clostridium sensu stricto 1	s__Clostridium sp. Marseille-P2414
ASV252822	1_denmark	0.002	11.7.2020	2020	Breeding	Denmark	Svendborg	55.0557	Oct.31	Male	Adult	k__Bacteria	p__Proteobacteria	c__Gammaproteobacteria	o__Enterobacterales	f__Enterobacteriaceae	g__Escherichia-Shigella	s__Escherichia marmotae
ASV253378	3_denmark	0.002	11.7.2020	2020	Breeding	Denmark	Svendborg	55.0557	Oct.31	Female	Adult	k__Bacteria	p__Actinobacteriota	c__Actinobacteria	o__Corynebacteriales	f__Nocardiaceae	g__Nocardia	s__
ASV253459	1_vantaa	0.002	1.9.2020	2020	Breeding	Finland	Lansinnatus	60.249	25.118	Male	Young	k__Bacteria	p__Proteobacteria	c__Gammaproteobacteria	o__Pseudomonadales	f__Pseudomonadaceae	g__Pseudomonas	s__Pseudomonas flavescens
ASV256772	1_denmark	0.002	11.7.2020	2020	Breeding	Denmark	Svendborg	55.0557	Oct.31	Male	Adult	k__Bacteria	p__Proteobacteria	c__Gammaproteobacteria	o__Enterobacterales	f__Enterobacteriaceae	g__Escherichia-Shigella	s__Escherichia marmotae
ASV256857	A810989	0.002	24.3.2021	2021	Spring	Finland	Hanko	59.8283	22.9659	Male	Adult	k__Bacteria	p__Campylobacterota	c__Campylobacteria	o__Campylobacterales	f__Campylobacteraceae	g__Campylobacter	s__Campylobacter sp. MIT 07-5167C
ASV256940	A811018	0.002	26.3.2021	2021	Spring	Finland	Hanko	59.8283	22.9659	Female	Adult	k__Bacteria	p__Proteobacteria	c__Gammaproteobacteria	o__Enterobacterales	f__Enterobacteriaceae	g__Escherichia-Shigella	s__Escherichia coli
ASV258244	8_chize	0.002	18.5.2021	2021	Breeding	France	Chize forest	46.1504	0.4242	Male	Unknown	k__Bacteria	p__Campylobacterota	c__Campylobacteria	o__Campylobacterales	f__Helicobacteraceae	g__Helicobacter	s__Helicobacter sp. 'B52D Seymour'
ASV264217	14_vantaa	0.002	1.10.2020	2020	Autumn	Finland	Lansinnatus	60.249	25.118	Male	Adult	k__Bacteria	p__Campylobacterota	c__Campylobacteria	o__Campylobacterales	f__Campylobacteraceae	g__Campylobacter	s__Campylobacter jejuni subsp. jejuni LMG 23211
ASV267029	LV45	0.002	30.9.2020	2020	Autumn	Latvia	Pape	56.1625	21.0656	Male	Young	k__Bacteria	p__Proteobacteria	c__Gammaproteobacteria	o__Pseudomonadales	f__Pseudomonadaceae	g__Pseudomonas	s__Pseudomonas sp. TKP
ASV267681	8A85329	0.002	5.8.2020	2020	Breeding	Denmark	Tinning Mose	56.266	9.957	Male	Young	k__Bacteria	p__Proteobacteria	c__Gammaproteobacteria	o__Enterobacterales	f__Enterobacteriaceae	g__Escherichia-Shigella	s__Escherichia coli
ASV267804	2_denmark	0.002	11.7.2020	2020	Breeding	Denmark	Svendborg	55.0557	Oct.31	Male	Adult	k__Bacteria	p__Proteobacteria	c__Gammaproteobacteria	o__Pseudomonadales	f__Pseudomonadaceae	g__Pseudomonas	s__Pseudomonas sp. FDAARGOS_380
ASV269301	A686081	0.002	24.9.2020	2020	Autumn	Finland	Karjaa	60.0715	23.662	Male	Young	k__Bacteria	p__Campylobacterota	c__Campylobacteria	o__Campylobacterales	f__Campylobacteraceae	g__Campylobacter	s__
ASV269331	9_denmark	0.002	21.7.2020	2020	Breeding	Denmark	Svendborg	55.0557	Oct.31	Female	Adult	k__Bacteria	p__Firmicutes	c__Bacilli	o__Bacillales	f__Bacillaceae	g__Bacillus	s__
ASV269568	A810991	0.002	25.3.2021	2021	Spring	Finland	Hanko	59.8283	22.9659	Male	Adult	k__Bacteria	p__Campylobacterota	c__Campylobacteria	o__Campylobacterales	f__Campylobacteraceae	g__Campylobacter	s__Campylobacter jejuni
ASV270144	16_denmark	0.002	22.9.2020	2020	Autumn	Denmark	Bagenkop	54.728	Oct.52	Male	Young	k__Bacteria	p__Proteobacteria	c__Gammaproteobacteria	o__Enterobacterales	f__Enterobacteriaceae	g__Escherichia-Shigella	s__Escherichia albertii
ASV270604	LV45	0.002	30.9.2020	2020	Autumn	Latvia	Pape	56.1625	21.0656	Male	Young	k__Bacteria	p__Proteobacteria	c__Gammaproteobacteria	o__Pseudomonadales	f__Pseudomonadaceae	g__Pseudomonas	s__Pseudomonas sp. TKP
ASV270715	A810983	0.002	23.3.2021	2021	Spring	Finland	Hanko	59.8283	22.9659	Male	Adult	k__Bacteria	p__Campylobacterota	c__Campylobacteria	o__Campylobacterales	f__Campylobacteraceae	g__Campylobacter	s__Campylobacter jejuni
ASV271326	3_denmark	0.002	11.7.2020	2020	Breeding	Denmark	Svendborg	55.0557	Oct.31	Female	Adult	k__Bacteria	p__Proteobacteria	c__Gammaproteobacteria	o__Enterobacterales	f__Enterobacteriaceae	g__Escherichia-Shigella	s__Escherichia marmotae
ASV272202	A809582	0.002	9.8.2020	2020	Breeding	Finland	Hanko	59.8283	22.9659	Male	Young	k__Bacteria	p__Proteobacteria	c__Gammaproteobacteria	o__Enterobacterales	f__Enterobacteriaceae	g__Escherichia-Shigella	s__Escherichia marmotae
ASV272266	8A85322	0.002	20.7.2020	2020	Breeding	Denmark	Tinning Mose	56.266	9.957	Female	Adult	k__Bacteria	p__Proteobacteria	c__Gammaproteobacteria	o__Enterobacterales	f__Enterobacteriaceae	g__Escherichia-Shigella	s__Escherichia marmotae
ASV272967	14_chize	0.002	31.5.2021	2021	Breeding	France	Chize forest	46.1523	0.437	Female	Unknown	k__Bacteria	p__Firmicutes	c__Bacilli	o__Mycoplasmatales	f__Mycoplasmataceae	g__Ureaplasma	s__
ASV273037	A810992	0.002	25.3.2021	2021	Spring	Finland	Hanko	59.8283	22.9659	Female	Adult	k__Bacteria	p__Campylobacterota	c__Campylobacteria	o__Campylobacterales	f__Campylobacteraceae	g__Campylobacter	s__Campylobacter jejuni
ASV273471	A810982	0.002	22.3.2021	2021	Spring	Finland	Hanko	59.8283	22.9659	Male	Adult	k__Bacteria	p__Proteobacteria	c__Gammaproteobacteria	o__Enterobacterales	f__Enterobacteriaceae	g__Escherichia-Shigella	s__Escherichia marmotae
ASV274370	7_vantaa	0.002	2.9.2020	2020	Breeding	Finland	Lansinnatus	60.249	25.118	Male	Young	k__Bacteria	p__Proteobacteria	c__Gammaproteobacteria	o__Enterobacterales	f__Enterobacteriaceae	g__Escherichia-Shigella	s__Escherichia albertii
ASV274563	9_vantaa	0.002	14.9.2020	2020	Breeding	Finland	Lansinnatus	60.249	25.118	Female	Young	k__Bacteria	p__Proteobacteria	c__Gammaproteobacteria	o__Enterobacterales	f__Enterobacteriaceae	g__Escherichia-Shigella	s__Escherichia marmotae
ASV274696	8_denmark	0.002	21.7.2020	2020	Breeding	Denmark	Svendborg	55.0557	Oct.31	Male	Young	k__Bacteria	p__Proteobacteria	c__Gammaproteobacteria	o__Pseudomonadales	f__Pseudomonadaceae	g__Pseudomonas	s__Pseudomonas sp. S09G 359
ASV276431	A686083	0.002	25.9.2020	2020	Autumn	Finland	Karjaa	60.0715	23.662	Male	Young	k__Bacteria	p__Campylobacterota	c__Campylobacteria	o__Campylobacterales	f__Helicobacteraceae	g__Helicobacter	s__Helicobacter sp. 'B52D Seymour'
ASV280466	VD_01	0.002	27.7.2020	2020	Breeding	Denmark	Tinning Mose	56.266	9.957	Female	Young	k__Bacteria	p__Campylobacterota	c__Campylobacteria	o__Campylobacterales	f__Campylobacteraceae	g__Campylobacter	s__Campylobacter sp. RM16704
ASV282225	A810994	0.002	26.3.2021	2021	Spring	Finland	Hanko	59.8283	22.9659	Female	Adult	k__Bacteria	p__Proteobacteria	c__Gammaproteobacteria	o__Pseudomonadales	f__Pseudomonadaceae	g__Pseudomonas	s__Pseudomonas libanensis
ASV282494	A811018	0.002	26.3.2021	2021	Spring	Finland	Hanko	59.8283	22.9659	Female	Adult	k__Bacteria	p__Proteobacteria	c__Gammaproteobacteria	o__Enterobacterales	f__Enterobacteriaceae	g__Escherichia-Shigella	s__
ASV282664	A810991	0.002	25.3.2021	2021	Spring	Finland	Hanko	59.8283	22.9659	Male	Adult	k__Bacteria	p__Campylobacterota	c__Campylobacteria	o__Campylobacterales	f__Campylobacteraceae	g__Campylobacter	s__Campylobacter sp. MIT 07-5167C
ASV283289	1_vantaa	0.002	1.9.2020	2020	Breeding	Finland	Lansinnatus	60.249	25.118	Male	Young	k__Bacteria	p__Firmicutes	c__Bacilli	o__Bacillales	f__Bacillaceae	g__Bacillus	s__Bacillus gaemokensis
ASV283991	12_denmark	0.002	16.8.2020	2020	Breeding	Denmark	Bagenkop	54.728	Oct.52	Unknown	Young	k__Bacteria	p__Firmicutes	c__Clostridia	o__Clostridiales	f__Clostridiaceae	g__Clostridium sensu stricto 1	s__Clostridium sp. Marseille-P2414
ASV288706	A810994	0.002	26.3.2021	2021	Spring	Finland	Hanko	59.8283	22.9659	Female	Adult	k__Bacteria	p__Proteobacteria	c__Gammaproteobacteria	o__Enterobacterales	f__Enterobacteriaceae	g__Escherichia-Shigella	s__Escherichia marmotae
ASV289129	A811018	0.002	26.3.2021	2021	Spring	Finland	Hanko	59.8283	22.9659	Female	Adult	k__Bacteria	p__Firmicutes	c__Clostridia	o__Clostridiales	f__Clostridiaceae	g__Clostridium sensu stricto 1	s__Clostridium perfringens NCTC 8239
ASV289442	2_vantaa	0.002	2.9.2020	2020	Breeding	Finland	Lansinnatus	60.249	25.118	Male	Young	k__Bacteria	p__Proteobacteria	c__Gammaproteobacteria	o__Enterobacterales	f__Enterobacteriaceae	g__Escherichia-Shigella	s__Escherichia coli
ASV289815	14_denmark	0.002	20.9.2020	2020	Autumn	Denmark	Hjulby	55.3422	Oct.66	Male	Young	k__Bacteria	p__Firmicutes	c__Bacilli	o__Lactobacillales	f__Streptococcaceae	g__Streptococcus	s__Streptococcus equinus ATCC 700338
ASV290258	3_denmark	0.002	11.7.2020	2020	Breeding	Denmark	Svendborg	55.0557	Oct.31	Female	Adult	k__Bacteria	p__Firmicutes	c__Bacilli	o__Bacillales	f__Bacillaceae	g__Bacillus	s__
ASV290290	8A85329	0.002	5.8.2020	2020	Breeding	Denmark	Tinning Mose	56.266	9.957	Male	Young	k__Bacteria	p__Firmicutes	c__Clostridia	o__Clostridiales	f__Clostridiaceae	g__Clostridium sensu stricto 1	s__Clostridium perfringens
ASV291389	LV09	0.002	17.9.2020	2020	Autumn	Latvia	Pape	56.1625	21.0656	Male	Young	k__Bacteria	p__Campylobacterota	c__Campylobacteria	o__Campylobacterales	f__Helicobacteraceae	g__Helicobacter	s__Helicobacter anseris
ASV292336	A810983	0.002	23.3.2021	2021	Spring	Finland	Hanko	59.8283	22.9659	Male	Adult	k__Bacteria	p__Campylobacterota	c__Campylobacteria	o__Campylobacterales	f__Campylobacteraceae	g__Campylobacter	s__Campylobacter jejuni subsp. jejuni HB93-13
ASV293462	1_vantaa	0.002	1.9.2020	2020	Breeding	Finland	Lansinnatus	60.249	25.118	Male	Young	k__Bacteria	p__Proteobacteria	c__Gammaproteobacteria	o__Pseudomonadales	f__Pseudomonadaceae	g__Pseudomonas	s__
ASV296110	8A85322	0.002	20.7.2020	2020	Breeding	Denmark	Tinning Mose	56.266	9.957	Female	Adult	k__Bacteria	p__Proteobacteria	c__Gammaproteobacteria	o__Enterobacterales	f__Enterobacteriaceae	g__Escherichia-Shigella	s__Escherichia marmotae
ASV297179	A810983	0.002	23.3.2021	2021	Spring	Finland	Hanko	59.8283	22.9659	Male	Adult	k__Bacteria	p__Campylobacterota	c__Campylobacteria	o__Campylobacterales	f__Campylobacteraceae	g__Campylobacter	s__Campylobacter jejuni subsp. jejuni LMG 9872
ASV297960	A686081	0.002	24.9.2020	2020	Autumn	Finland	Karjaa	60.0715	23.662	Male	Young	k__Bacteria	p__Campylobacterota	c__Campylobacteria	o__Campylobacterales	f__Campylobacteraceae	g__Campylobacter	s__Campylobacter jejuni subsp. jejuni LMG 23211
ASV298766	A809585	0.002	11.8.2020	2020	Breeding	Finland	Hanko	59.8283	22.9659	Male	Young	k__Bacteria	p__Campylobacterota	c__Campylobacteria	o__Campylobacterales	f__Helicobacteraceae	g__Helicobacter	s__Helicobacter sp. 'B52D Seymour'
ASV300402	A810982	0.002	22.3.2021	2021	Spring	Finland	Hanko	59.8283	22.9659	Male	Adult	k__Bacteria	p__Proteobacteria	c__Gammaproteobacteria	o__Enterobacterales	f__Enterobacteriaceae	g__Escherichia-Shigella	s__Escherichia marmotae
ASV301668	6_vantaa	0.002	2.9.2020	2020	Breeding	Finland	Lansinnatus	60.249	25.118	Male	Young	k__Bacteria	p__Proteobacteria	c__Gammaproteobacteria	o__Enterobacterales	f__Morganellaceae	g__Proteus	s__Proteus hauseri
ASV302177	A811018	0.002	26.3.2021	2021	Spring	Finland	Hanko	59.8283	22.9659	Female	Adult	k__Bacteria	p__Proteobacteria	c__Gammaproteobacteria	o__Enterobacterales	f__Enterobacteriaceae	g__Escherichia-Shigella	s__Escherichia coli
ASV302689	16_denmark	0.002	22.9.2020	2020	Autumn	Denmark	Bagenkop	54.728	Oct.52	Male	Young	k__Bacteria	p__Proteobacteria	c__Gammaproteobacteria	o__Enterobacterales	f__Enterobacteriaceae	g__Escherichia-Shigella	s__Escherichia albertii
ASV303227	3_denmark	0.002	11.7.2020	2020	Breeding	Denmark	Svendborg	55.0557	Oct.31	Female	Adult	k__Bacteria	p__Actinobacteriota	c__Actinobacteria	o__Corynebacteriales	f__Mycobacteriaceae	g__Mycobacterium	s__
ASV306088	8_vantaa	0.002	2.9.2020	2020	Breeding	Finland	Lansinnatus	60.249	25.118	Male	Young	k__Bacteria	p__Proteobacteria	c__Gammaproteobacteria	o__Enterobacterales	f__Enterobacteriaceae	g__Escherichia-Shigella	s__Escherichia marmotae
ASV306426	A686068	0.002	5.10.2020	2020	Autumn	Finland	Karjaa	60.0715	23.662	Male	Young	k__Bacteria	p__Campylobacterota	c__Campylobacteria	o__Campylobacterales	f__Campylobacteraceae	g__Campylobacter	s__Campylobacter jejuni subsp. jejuni LMG 23269
ASV306533	A810991	0.002	25.3.2021	2021	Spring	Finland	Hanko	59.8283	22.9659	Male	Adult	k__Bacteria	p__Firmicutes	c__Bacilli	o__Mycoplasmatales	f__Mycoplasmataceae	g__Mycoplasma	s__Mycoplasma penetrans HF-2
ASV306733	A811018	0.002	26.3.2021	2021	Spring	Finland	Hanko	59.8283	22.9659	Female	Adult	k__Bacteria	p__Proteobacteria	c__Gammaproteobacteria	o__Enterobacterales	f__Enterobacteriaceae	g__Escherichia-Shigella	s__Escherichia albertii
ASV308472	A810982	0.002	22.3.2021	2021	Spring	Finland	Hanko	59.8283	22.9659	Male	Adult	k__Bacteria	p__Firmicutes	c__Bacilli	o__Mycoplasmatales	f__Mycoplasmataceae	g__Mycoplasma	s__Mycoplasma moatsii ATCC 27625
ASV308514	14_chize	0.002	31.5.2021	2021	Breeding	France	Chize forest	46.1523	0.437	Female	Unknown	k__Bacteria	p__Proteobacteria	c__Gammaproteobacteria	o__Enterobacterales	f__Enterobacteriaceae	g__Enterobacter	s__Enterobacter sp. SA187
ASV309106	A810991	0.002	25.3.2021	2021	Spring	Finland	Hanko	59.8283	22.9659	Male	Adult	k__Bacteria	p__Campylobacterota	c__Campylobacteria	o__Campylobacterales	f__Campylobacteraceae	g__Campylobacter	s__Campylobacter sp. RM16704
ASV309492	LV29	0.002	23.9.2020	2020	Autumn	Latvia	Pape	56.1625	21.0656	Female	Young	k__Bacteria	p__Proteobacteria	c__Gammaproteobacteria	o__Enterobacterales	f__Enterobacteriaceae	g__Escherichia-Shigella	s__Escherichia marmotae
ASV310506	A809585	0.002	11.8.2020	2020	Breeding	Finland	Hanko	59.8283	22.9659	Male	Young	k__Bacteria	p__Campylobacterota	c__Campylobacteria	o__Campylobacterales	f__Helicobacteraceae	g__Helicobacter	s__Helicobacter sp. 'B52D Seymour'
ASV311281	2_denmark	0.002	11.7.2020	2020	Breeding	Denmark	Svendborg	55.0557	Oct.31	Male	Adult	k__Bacteria	p__Proteobacteria	c__Gammaproteobacteria	o__Pseudomonadales	f__Pseudomonadaceae	g__Pseudomonas	s__Pseudomonas sp. S09G 359
ASV312617	A810991	0.002	25.3.2021	2021	Spring	Finland	Hanko	59.8283	22.9659	Male	Adult	k__Bacteria	p__Campylobacterota	c__Campylobacteria	o__Campylobacterales	f__Campylobacteraceae	g__Campylobacter	s__Campylobacter jejuni
ASV313138	A810988	0.002	24.3.2021	2021	Spring	Finland	Hanko	59.8283	22.9659	Male	Adult	k__Bacteria	p__Firmicutes	c__Bacilli	o__Mycoplasmatales	f__Mycoplasmataceae	g__Ureaplasma	s__
ASV313736	9_denmark	0.002	21.7.2020	2020	Breeding	Denmark	Svendborg	55.0557	Oct.31	Female	Adult	k__Bacteria	p__Proteobacteria	c__Gammaproteobacteria	o__Pseudomonadales	f__Pseudomonadaceae	g__Pseudomonas	s__Pseudomonas fragi
ASV314532	1_denmark	0.002	11.7.2020	2020	Breeding	Denmark	Svendborg	55.0557	Oct.31	Male	Adult	k__Bacteria	p__Proteobacteria	c__Gammaproteobacteria	o__Enterobacterales	f__Enterobacteriaceae	g__Citrobacter	s__Citrobacter werkmanii
ASV314790	8A85329	0.002	5.8.2020	2020	Breeding	Denmark	Tinning Mose	56.266	9.957	Male	Young	k__Bacteria	p__Proteobacteria	c__Gammaproteobacteria	o__Enterobacterales	f__Enterobacteriaceae	g__Escherichia-Shigella	s__Escherichia marmotae
ASV315411	2_vantaa	0.002	2.9.2020	2020	Breeding	Finland	Lansinnatus	60.249	25.118	Male	Young	k__Bacteria	p__Proteobacteria	c__Gammaproteobacteria	o__Enterobacterales	f__Enterobacteriaceae	g__Escherichia-Shigella	s__Escherichia coli
ASV315702	2_denmark	0.002	11.7.2020	2020	Breeding	Denmark	Svendborg	55.0557	Oct.31	Male	Adult	k__Bacteria	p__Actinobacteriota	c__Actinobacteria	o__Corynebacteriales	f__Mycobacteriaceae	g__Mycobacterium	s__
ASV315775	11_denmark	0.002	1.8.2020	2020	Breeding	Denmark	Svendborg	55.0557	Oct.31	Male	Adult	k__Bacteria	p__Proteobacteria	c__Gammaproteobacteria	o__Pseudomonadales	f__Pseudomonadaceae	g__Pseudomonas	s__Pseudomonas yamanorum
ASV316436	D26	0.002	20.5.2021	2021	Breeding	France	Chize forest	46.0979	0.4134	Female	Unknown	k__Bacteria	p__Firmicutes	c__Clostridia	o__Clostridiales	f__Clostridiaceae	g__Clostridium sensu stricto 1	s__
ASV316604	12_denmark	0.002	16.8.2020	2020	Breeding	Denmark	Bagenkop	54.728	Oct.52	Unknown	Young	k__Bacteria	p__Firmicutes	c__Bacilli	o__Staphylococcales	f__Staphylococcaceae	g__Staphylococcus	s__Staphylococcus stepanovicii
ASV320991	11_vantaa	0.002	14.9.2020	2020	Breeding	Finland	Lansinnatus	60.249	25.118	Male	Adult	k__Bacteria	p__Actinobacteriota	c__Actinobacteria	o__Corynebacteriales	f__Mycobacteriaceae	g__Mycobacterium	s__
ASV322584	A811018	0.002	26.3.2021	2021	Spring	Finland	Hanko	59.8283	22.9659	Female	Adult	k__Bacteria	p__Proteobacteria	c__Gammaproteobacteria	o__Enterobacterales	f__Enterobacteriaceae	g__Escherichia-Shigella	s__Escherichia coli S88
ASV323041	A810982	0.002	22.3.2021	2021	Spring	Finland	Hanko	59.8283	22.9659	Male	Adult	k__Bacteria	p__Proteobacteria	c__Gammaproteobacteria	o__Enterobacterales	f__Enterobacteriaceae	g__Escherichia-Shigella	s__Escherichia marmotae
ASV323061	7_denmark	0.002	21.7.2020	2020	Breeding	Denmark	Svendborg	55.0557	Oct.31	Female	Adult	k__Bacteria	p__Firmicutes	c__Bacilli	o__Mycoplasmatales	f__Mycoplasmataceae	g__Mycoplasma	s__Mycoplasma penetrans HF-2
ASV324003	13_vantaa	0.002	1.10.2020	2020	Autumn	Finland	Lansinnatus	60.249	25.118	Male	Adult	k__Bacteria	p__Proteobacteria	c__Gammaproteobacteria	o__Enterobacterales	f__Enterobacteriaceae	g__Escherichia-Shigella	s__Escherichia marmotae
ASV324062	8A85324	0.002	30.7.2020	2020	Breeding	Denmark	Tinning Mose	56.266	9.957	Male	Adult	k__Bacteria	p__Proteobacteria	c__Gammaproteobacteria	o__Enterobacterales	f__Enterobacteriaceae	g__Escherichia-Shigella	s__Escherichia coli
ASV325201	12_denmark	0.002	16.8.2020	2020	Breeding	Denmark	Bagenkop	54.728	Oct.52	Unknown	Young	k__Bacteria	p__Firmicutes	c__Clostridia	o__Clostridiales	f__Clostridiaceae	g__Clostridium sensu stricto 1	s__Clostridium sp. Marseille-P2414
ASV327348	9_denmark	0.002	21.7.2020	2020	Breeding	Denmark	Svendborg	55.0557	Oct.31	Female	Adult	k__Bacteria	p__Proteobacteria	c__Gammaproteobacteria	o__Pseudomonadales	f__Pseudomonadaceae	g__Pseudomonas	s__Pseudomonas versuta
ASV327989	7_denmark	0.002	21.7.2020	2020	Breeding	Denmark	Svendborg	55.0557	Oct.31	Female	Adult	k__Bacteria	p__Firmicutes	c__Bacilli	o__Staphylococcales	f__Staphylococcaceae	g__Staphylococcus	s__Staphylococcus agnetis
ASV328110	8A85322	0.002	20.7.2020	2020	Breeding	Denmark	Tinning Mose	56.266	9.957	Female	Adult	k__Bacteria	p__Proteobacteria	c__Gammaproteobacteria	o__Enterobacterales	f__Enterobacteriaceae	g__Escherichia-Shigella	s__Escherichia marmotae
ASV329114	9_denmark	0.002	21.7.2020	2020	Breeding	Denmark	Svendborg	55.0557	Oct.31	Female	Adult	k__Bacteria	p__Firmicutes	c__Clostridia	o__Clostridiales	f__Clostridiaceae	g__Clostridium sensu stricto 1	s__
ASV330496	6_denmark	0.002	21.7.2020	2020	Breeding	Denmark	Svendborg	55.0557	Oct.31	Unknown	Young	k__Bacteria	p__Firmicutes	c__Bacilli	o__Staphylococcales	f__Staphylococcaceae	g__Staphylococcus	s__Staphylococcus agnetis
ASV331878	10_chize	0.002	20.5.2021	2021	Breeding	France	Chize forest	46.1578	0.4308	Male	Unknown	k__Bacteria	p__Campylobacterota	c__Campylobacteria	o__Campylobacterales	f__Campylobacteraceae	g__Campylobacter	s__Campylobacter sp. RM16704
ASV332396	A809582	0.002	9.8.2020	2020	Breeding	Finland	Hanko	59.8283	22.9659	Male	Young	k__Bacteria	p__Proteobacteria	c__Gammaproteobacteria	o__Enterobacterales	f__Enterobacteriaceae	g__Escherichia-Shigella	s__Escherichia marmotae
ASV332808	14_denmark	0.002	20.9.2020	2020	Autumn	Denmark	Hjulby	55.3422	Oct.66	Male	Young	k__Bacteria	p__Firmicutes	c__Clostridia	o__Clostridiales	f__Clostridiaceae	g__Clostridium sensu stricto 1	s__
ASV332871	A686080	0.002	23.9.2020	2020	Autumn	Finland	Karjaa	60.0715	23.662	Male	Young	k__Bacteria	p__Campylobacterota	c__Campylobacteria	o__Campylobacterales	f__Campylobacteraceae	g__Campylobacter	s__Campylobacter helveticus
ASV333784	16_denmark	0.002	22.9.2020	2020	Autumn	Denmark	Bagenkop	54.728	Oct.52	Male	Young	k__Bacteria	p__Proteobacteria	c__Gammaproteobacteria	o__Enterobacterales	f__Enterobacteriaceae	g__Escherichia-Shigella	s__Escherichia albertii
ASV334005	8A85322	0.002	20.7.2020	2020	Breeding	Denmark	Tinning Mose	56.266	9.957	Female	Adult	k__Bacteria	p__Firmicutes	c__Clostridia	o__Clostridiales	f__Clostridiaceae	g__Clostridium sensu stricto 1	s__Clostridium sp. Marseille-P2414
ASV335055	6_vantaa	0.002	2.9.2020	2020	Breeding	Finland	Lansinnatus	60.249	25.118	Male	Young	k__Bacteria	p__Proteobacteria	c__Gammaproteobacteria	o__Enterobacterales	f__Enterobacteriaceae	g__Escherichia-Shigella	s__Escherichia coli
ASV336514	9_denmark	0.002	21.7.2020	2020	Breeding	Denmark	Svendborg	55.0557	Oct.31	Female	Adult	k__Bacteria	p__Firmicutes	c__Clostridia	o__Clostridiales	f__Clostridiaceae	g__Clostridium sensu stricto 1	s__Clostridium perfringens
ASV336963	1_vantaa	0.002	1.9.2020	2020	Breeding	Finland	Lansinnatus	60.249	25.118	Male	Young	k__Bacteria	p__Proteobacteria	c__Gammaproteobacteria	o__Pseudomonadales	f__Pseudomonadaceae	g__Pseudomonas	s__
ASV339346	8E13246	0.002	Unknown	2020	NA	Denmark	Tinning Mose	56.266	9.957	Female	Adult	k__Bacteria	p__Proteobacteria	c__Gammaproteobacteria	o__Enterobacterales	f__Enterobacteriaceae	g__Escherichia-Shigella	s__Escherichia marmotae
ASV339706	12_denmark	0.002	16.8.2020	2020	Breeding	Denmark	Bagenkop	54.728	Oct.52	Unknown	Young	k__Bacteria	p__Proteobacteria	c__Gammaproteobacteria	o__Pseudomonadales	f__Pseudomonadaceae	g__Pseudomonas	s__Pseudomonas sp. FDAARGOS_380
ASV340755	8A85324	0.002	30.7.2020	2020	Breeding	Denmark	Tinning Mose	56.266	9.957	Male	Adult	k__Bacteria	p__Firmicutes	c__Bacilli	o__Mycoplasmatales	f__Mycoplasmataceae	g__Mycoplasma	s__Mycoplasma penetrans HF-2
ASV341385	LV29	0.002	23.9.2020	2020	Autumn	Latvia	Pape	56.1625	21.0656	Female	Young	k__Bacteria	p__Proteobacteria	c__Gammaproteobacteria	o__Enterobacterales	f__Enterobacteriaceae	g__Escherichia-Shigella	s__Escherichia marmotae
ASV343425	A810920	0.002	12.8.2020	2020	Breeding	Finland	Hanko	59.8283	22.9659	Male	Young	k__Bacteria	p__Proteobacteria	c__Gammaproteobacteria	o__Enterobacterales	f__Enterobacteriaceae	g__Escherichia-Shigella	s__Escherichia coli
ASV343663	5_vantaa	0.002	2.9.2020	2020	Breeding	Finland	Lansinnatus	60.249	25.118	Female	Young	k__Bacteria	p__Actinobacteriota	c__Actinobacteria	o__Corynebacteriales	f__Mycobacteriaceae	g__Mycobacterium	s__
ASV343950	A686080	0.002	23.9.2020	2020	Autumn	Finland	Karjaa	60.0715	23.662	Male	Young	k__Bacteria	p__Campylobacterota	c__Campylobacteria	o__Campylobacterales	f__Campylobacteraceae	g__Campylobacter	s__Campylobacter jejuni subsp. jejuni LMG 23211
ASV344322	D27	0.002	27.5.2021	2021	Breeding	France	Chize forest	46.0951	0.4133	Female	Unknown	k__Bacteria	p__Firmicutes	c__Clostridia	o__Clostridiales	f__Clostridiaceae	g__Clostridium sensu stricto 1	s__Clostridium sp. Marseille-P2414
ASV346801	2_denmark	0.002	11.7.2020	2020	Breeding	Denmark	Svendborg	55.0557	Oct.31	Male	Adult	k__Bacteria	p__Proteobacteria	c__Gammaproteobacteria	o__Pseudomonadales	f__Moraxellaceae	g__Acinetobacter	s__Acinetobacter nectaris
ASV347259	9_denmark	0.002	21.7.2020	2020	Breeding	Denmark	Svendborg	55.0557	Oct.31	Female	Adult	k__Bacteria	p__Proteobacteria	c__Gammaproteobacteria	o__Pseudomonadales	f__Pseudomonadaceae	g__Pseudomonas	s__Pseudomonas fluorescens
ASV347470	1_denmark	0.002	11.7.2020	2020	Breeding	Denmark	Svendborg	55.0557	Oct.31	Male	Adult	k__Bacteria	p__Proteobacteria	c__Gammaproteobacteria	o__Enterobacterales	f__Enterobacteriaceae	g__Citrobacter	s__Citrobacter werkmanii
ASV347689	9_denmark	0.002	21.7.2020	2020	Breeding	Denmark	Svendborg	55.0557	Oct.31	Female	Adult	k__Bacteria	p__Firmicutes	c__Clostridia	o__Clostridiales	f__Clostridiaceae	g__Clostridium sensu stricto 1	s__
ASV348783	6_chize	0.002	18.5.2021	2021	Breeding	France	Chize forest	46.1504	0.4242	Female	Unknown	k__Bacteria	p__Actinobacteriota	c__Actinobacteria	o__Corynebacteriales	f__Mycobacteriaceae	g__Mycobacterium	s__
ASV348831	9_denmark	0.002	21.7.2020	2020	Breeding	Denmark	Svendborg	55.0557	Oct.31	Female	Adult	k__Bacteria	p__Firmicutes	c__Bacilli	o__Mycoplasmatales	f__Mycoplasmataceae	g__Mycoplasma	s__Mycoplasma penetrans HF-2
ASV351210	1_vantaa	0.002	1.9.2020	2020	Breeding	Finland	Lansinnatus	60.249	25.118	Male	Young	k__Bacteria	p__Proteobacteria	c__Gammaproteobacteria	o__Pseudomonadales	f__Pseudomonadaceae	g__Pseudomonas	s__Pseudomonas sp. R-42020
ASV351668	A686067	0.002	31.5.2020	2020	Breeding	Finland	Karjaa	60.0715	23.662	Male	Adult	k__Bacteria	p__Firmicutes	c__Clostridia	o__Clostridiales	f__Clostridiaceae	g__Clostridium sensu stricto 1	s__Clostridium perfringens NCTC 8239
ASV352293	D28	0.002	31.5.2021	2021	Breeding	France	Chize forest	46.1201	0.4585	Male	Unknown	k__Bacteria	p__Firmicutes	c__Bacilli	o__Mycoplasmatales	f__Mycoplasmataceae	g__Mycoplasma	s__Mycoplasma penetrans HF-2
ASV352447	9_denmark	0.002	21.7.2020	2020	Breeding	Denmark	Svendborg	55.0557	Oct.31	Female	Adult	k__Bacteria	p__Firmicutes	c__Clostridia	o__Clostridiales	f__Clostridiaceae	g__Clostridium sensu stricto 1	s__
ASV353279	1_denmark	0.002	11.7.2020	2020	Breeding	Denmark	Svendborg	55.0557	Oct.31	Male	Adult	k__Bacteria	p__Proteobacteria	c__Gammaproteobacteria	o__Enterobacterales	f__Enterobacteriaceae	g__Escherichia-Shigella	s__Escherichia marmotae
ASV354497	9_denmark	0.002	21.7.2020	2020	Breeding	Denmark	Svendborg	55.0557	Oct.31	Female	Adult	k__Bacteria	p__Firmicutes	c__Bacilli	o__Bacillales	f__Bacillaceae	g__Bacillus	s__
ASV355111	VD_01	0.002	27.7.2020	2020	Breeding	Denmark	Tinning Mose	56.266	9.957	Female	Young	k__Bacteria	p__Campylobacterota	c__Campylobacteria	o__Campylobacterales	f__Campylobacteraceae	g__Campylobacter	s__Campylobacter sp. RM16704
ASV357326	8A85322	0.002	20.7.2020	2020	Breeding	Denmark	Tinning Mose	56.266	9.957	Female	Adult	k__Bacteria	p__Firmicutes	c__Bacilli	o__Mycoplasmatales	f__Mycoplasmataceae	g__Mycoplasma	s__Mycoplasma penetrans HF-2
ASV357812	LV09	0.002	17.9.2020	2020	Autumn	Latvia	Pape	56.1625	21.0656	Male	Young	k__Bacteria	p__Campylobacterota	c__Campylobacteria	o__Campylobacterales	f__Helicobacteraceae	g__Helicobacter	s__Helicobacter anseris
ASV357880	LV30	0.002	25.9.2020	2020	Autumn	Latvia	Pape	56.1625	21.0656	Female	Young	k__Bacteria	p__Campylobacterota	c__Campylobacteria	o__Campylobacterales	f__Campylobacteraceae	g__Campylobacter	s__Campylobacter jejuni subsp. jejuni LMG 23211
ASV362700	A810987	0.002	24.3.2021	2021	Spring	Finland	Hanko	59.8283	22.9659	Male	Adult	k__Bacteria	p__Firmicutes	c__Clostridia	o__Clostridiales	f__Clostridiaceae	g__Clostridium sensu stricto 1	s__Clostridium sp. Marseille-P2414
ASV363128	VD_01	0.002	27.7.2020	2020	Breeding	Denmark	Tinning Mose	56.266	9.957	Female	Young	k__Bacteria	p__Firmicutes	c__Bacilli	o__Mycoplasmatales	f__Mycoplasmataceae	g__Mycoplasma	s__Malacoplasma microti
ASV364565	A810994	0.002	26.3.2021	2021	Spring	Finland	Hanko	59.8283	22.9659	Female	Adult	k__Bacteria	p__Campylobacterota	c__Campylobacteria	o__Campylobacterales	f__Campylobacteraceae	g__Campylobacter	s__Campylobacter jejuni subsp. jejuni LMG 23269
ASV365353	12_denmark	0.002	16.8.2020	2020	Breeding	Denmark	Bagenkop	54.728	Oct.52	Unknown	Young	k__Bacteria	p__Proteobacteria	c__Gammaproteobacteria	o__Pseudomonadales	f__Pseudomonadaceae	g__Pseudomonas	s__Pseudomonas sp. FDAARGOS_380
ASV365731	12_denmark	0.002	16.8.2020	2020	Breeding	Denmark	Bagenkop	54.728	Oct.52	Unknown	Young	k__Bacteria	p__Proteobacteria	c__Gammaproteobacteria	o__Pseudomonadales	f__Pseudomonadaceae	g__Pseudomonas	s__Pseudomonas lurida
ASV366797	5_vantaa	0.002	2.9.2020	2020	Breeding	Finland	Lansinnatus	60.249	25.118	Female	Young	k__Bacteria	p__Actinobacteriota	c__Actinobacteria	o__Corynebacteriales	f__Mycobacteriaceae	g__Mycobacterium	s__
ASV367477	9_vantaa	0.002	14.9.2020	2020	Breeding	Finland	Lansinnatus	60.249	25.118	Female	Young	k__Bacteria	p__Proteobacteria	c__Gammaproteobacteria	o__Enterobacterales	f__Enterobacteriaceae	g__Escherichia-Shigella	s__Escherichia albertii
ASV367645	11_vantaa	0.002	14.9.2020	2020	Breeding	Finland	Lansinnatus	60.249	25.118	Male	Adult	k__Bacteria	p__Actinobacteriota	c__Actinobacteria	o__Corynebacteriales	f__Mycobacteriaceae	g__Mycobacterium	s__
ASV367923	VD_01	0.002	27.7.2020	2020	Breeding	Denmark	Tinning Mose	56.266	9.957	Female	Young	k__Bacteria	p__Campylobacterota	c__Campylobacteria	o__Campylobacterales	f__Campylobacteraceae	g__Campylobacter	s__Campylobacter sp. RM16704
ASV369330	A686080	0.002	23.9.2020	2020	Autumn	Finland	Karjaa	60.0715	23.662	Male	Young	k__Bacteria	p__Campylobacterota	c__Campylobacteria	o__Campylobacterales	f__Campylobacteraceae	g__Campylobacter	s__Campylobacter jejuni subsp. jejuni LMG 23211
ASV370367	9_denmark	0.002	21.7.2020	2020	Breeding	Denmark	Svendborg	55.0557	Oct.31	Female	Adult	k__Bacteria	p__Firmicutes	c__Clostridia	o__Clostridiales	f__Clostridiaceae	g__Clostridium sensu stricto 1	s__
ASV370498	2_vantaa	0.002	2.9.2020	2020	Breeding	Finland	Lansinnatus	60.249	25.118	Male	Young	k__Bacteria	p__Proteobacteria	c__Gammaproteobacteria	o__Enterobacterales	f__Enterobacteriaceae	g__Escherichia-Shigella	s__Escherichia coli ED1a
ASV371299	VD_01	0.002	27.7.2020	2020	Breeding	Denmark	Tinning Mose	56.266	9.957	Female	Young	k__Bacteria	p__Firmicutes	c__Bacilli	o__Mycoplasmatales	f__Mycoplasmataceae	g__Ureaplasma	s__
ASV371302	16_denmark	0.002	22.9.2020	2020	Autumn	Denmark	Bagenkop	54.728	Oct.52	Male	Young	k__Bacteria	p__Proteobacteria	c__Gammaproteobacteria	o__Enterobacterales	f__Enterobacteriaceae	g__Escherichia-Shigella	s__Escherichia coli
ASV371786	A810920	0.002	12.8.2020	2020	Breeding	Finland	Hanko	59.8283	22.9659	Male	Young	k__Bacteria	p__Proteobacteria	c__Gammaproteobacteria	o__Enterobacterales	f__Enterobacteriaceae	g__Escherichia-Shigella	s__Escherichia coli IAI39
ASV372893	A810986	0.002	24.3.2021	2021	Spring	Finland	Hanko	59.8283	22.9659	Female	Adult	k__Bacteria	p__Proteobacteria	c__Gammaproteobacteria	o__Enterobacterales	f__Enterobacteriaceae	g__Escherichia-Shigella	s__
ASV373623	3_denmark	0.002	11.7.2020	2020	Breeding	Denmark	Svendborg	55.0557	Oct.31	Female	Adult	k__Bacteria	p__Actinobacteriota	c__Actinobacteria	o__Corynebacteriales	f__Mycobacteriaceae	g__Mycobacterium	s__
ASV374019	LV13	0.002	19.9.2020	2020	Autumn	Latvia	Pape	56.1625	21.0656	Female	Adult	k__Bacteria	p__Actinobacteriota	c__Actinobacteria	o__Corynebacteriales	f__Mycobacteriaceae	g__Mycobacterium	s__
ASV377121	A686080	0.002	23.9.2020	2020	Autumn	Finland	Karjaa	60.0715	23.662	Male	Young	k__Bacteria	p__Campylobacterota	c__Campylobacteria	o__Campylobacterales	f__Campylobacteraceae	g__Campylobacter	s__Campylobacter jejuni subsp. jejuni ATCC 33560
ASV379015	LV30	0.002	25.9.2020	2020	Autumn	Latvia	Pape	56.1625	21.0656	Female	Young	k__Bacteria	p__Proteobacteria	c__Gammaproteobacteria	o__Enterobacterales	f__Enterobacteriaceae	g__Escherichia-Shigella	s__Escherichia marmotae
ASV380859	8A85322	0.002	20.7.2020	2020	Breeding	Denmark	Tinning Mose	56.266	9.957	Female	Adult	k__Bacteria	p__Proteobacteria	c__Gammaproteobacteria	o__Enterobacterales	f__Enterobacteriaceae	g__Escherichia-Shigella	s__Escherichia marmotae
ASV380913	LV29	0.002	23.9.2020	2020	Autumn	Latvia	Pape	56.1625	21.0656	Female	Young	k__Bacteria	p__Proteobacteria	c__Gammaproteobacteria	o__Enterobacterales	f__Enterobacteriaceae	g__Escherichia-Shigella	s__Escherichia coli 042
ASV381392	A686078	0.002	4.6.2020	2020	Breeding	Finland	Karjaa	60.0715	23.662	Male	Adult	k__Bacteria	p__Campylobacterota	c__Campylobacteria	o__Campylobacterales	f__Campylobacteraceae	g__Campylobacter	s__Campylobacter sp. RM16704
ASV381669	D13	0.002	18.5.2021	2021	Breeding	France	Chize forest	46.1126	0.4495	Male	Unknown	k__Bacteria	p__Firmicutes	c__Bacilli	o__Mycoplasmatales	f__Mycoplasmataceae	g__Ureaplasma	s__
ASV381864	A810992	0.002	25.3.2021	2021	Spring	Finland	Hanko	59.8283	22.9659	Female	Adult	k__Bacteria	p__Campylobacterota	c__Campylobacteria	o__Campylobacterales	f__Campylobacteraceae	g__Campylobacter	s__Campylobacter jejuni
ASV382124	16_denmark	0.002	22.9.2020	2020	Autumn	Denmark	Bagenkop	54.728	Oct.52	Male	Young	k__Bacteria	p__Proteobacteria	c__Gammaproteobacteria	o__Enterobacterales	f__Enterobacteriaceae	g__Escherichia-Shigella	s__Escherichia marmotae
ASV382842	9_chize	0.002	20.5.2021	2021	Breeding	France	Chize forest	46.1523	0.437	Male	Unknown	k__Bacteria	p__Campylobacterota	c__Campylobacteria	o__Campylobacterales	f__Campylobacteraceae	g__Campylobacter	s__Campylobacter sp. RM16704
ASV383134	10_chize	0.002	20.5.2021	2021	Breeding	France	Chize forest	46.1578	0.4308	Male	Unknown	k__Bacteria	p__Campylobacterota	c__Campylobacteria	o__Campylobacterales	f__Campylobacteraceae	g__Campylobacter	s__Campylobacter sp. RM16704
ASV383887	A810982	0.002	22.3.2021	2021	Spring	Finland	Hanko	59.8283	22.9659	Male	Adult	k__Bacteria	p__Proteobacteria	c__Gammaproteobacteria	o__Enterobacterales	f__Enterobacteriaceae	g__Escherichia-Shigella	s__Escherichia marmotae
ASV383943	A810982	0.002	22.3.2021	2021	Spring	Finland	Hanko	59.8283	22.9659	Male	Adult	k__Bacteria	p__Proteobacteria	c__Gammaproteobacteria	o__Enterobacterales	f__Enterobacteriaceae	g__Escherichia-Shigella	s__Escherichia marmotae
ASV384329	9_denmark	0.002	21.7.2020	2020	Breeding	Denmark	Svendborg	55.0557	Oct.31	Female	Adult	k__Bacteria	p__Firmicutes	c__Clostridia	o__Clostridiales	f__Clostridiaceae	g__Clostridium sensu stricto 1	s__
ASV385592	LV09	0.002	17.9.2020	2020	Autumn	Latvia	Pape	56.1625	21.0656	Male	Young	k__Bacteria	p__Campylobacterota	c__Campylobacteria	o__Campylobacterales	f__Helicobacteraceae	g__Helicobacter	s__Helicobacter anseris
ASV385653	A686080	0.002	23.9.2020	2020	Autumn	Finland	Karjaa	60.0715	23.662	Male	Young	k__Bacteria	p__Campylobacterota	c__Campylobacteria	o__Campylobacterales	f__Campylobacteraceae	g__Campylobacter	s__Campylobacter jejuni subsp. jejuni LMG 23211
ASV386096	LV29	0.002	23.9.2020	2020	Autumn	Latvia	Pape	56.1625	21.0656	Female	Young	k__Bacteria	p__Proteobacteria	c__Gammaproteobacteria	o__Enterobacterales	f__Enterobacteriaceae	g__Escherichia-Shigella	s__Escherichia marmotae
ASV387474	D28	0.002	31.5.2021	2021	Breeding	France	Chize forest	46.1201	0.4585	Male	Unknown	k__Bacteria	p__Campylobacterota	c__Campylobacteria	o__Campylobacterales	f__Campylobacteraceae	g__Campylobacter	s__Campylobacter sp. RM16704
ASV388815	A810986	0.002	24.3.2021	2021	Spring	Finland	Hanko	59.8283	22.9659	Female	Adult	k__Bacteria	p__Proteobacteria	c__Gammaproteobacteria	o__Enterobacterales	f__Enterobacteriaceae	g__Escherichia-Shigella	s__Escherichia marmotae
ASV389493	A809585	0.002	11.8.2020	2020	Breeding	Finland	Hanko	59.8283	22.9659	Male	Young	k__Bacteria	p__Campylobacterota	c__Campylobacteria	o__Campylobacterales	f__Helicobacteraceae	g__Helicobacter	s__Helicobacter sp. 'B52D Seymour'
ASV390346	9_denmark	0.002	21.7.2020	2020	Breeding	Denmark	Svendborg	55.0557	Oct.31	Female	Adult	k__Bacteria	p__Firmicutes	c__Bacilli	o__Bacillales	f__Bacillaceae	g__Bacillus	s__
ASV390601	8_vantaa	0.002	2.9.2020	2020	Breeding	Finland	Lansinnatus	60.249	25.118	Male	Young	k__Bacteria	p__Proteobacteria	c__Gammaproteobacteria	o__Enterobacterales	f__Enterobacteriaceae	g__Escherichia-Shigella	s__Escherichia marmotae
ASV391891	LV47	0.002	30.9.2020	2020	Autumn	Latvia	Pape	56.1625	21.0656	Female	Young	k__Bacteria	p__Campylobacterota	c__Campylobacteria	o__Campylobacterales	f__Helicobacteraceae	g__Helicobacter	s__Helicobacter anseris
ASV392724	LV31	0.002	26.9.2020	2020	Autumn	Latvia	Pape	56.1625	21.0656	Male	Young	k__Bacteria	p__Proteobacteria	c__Gammaproteobacteria	o__Enterobacterales	f__Enterobacteriaceae	g__Escherichia-Shigella	s__Escherichia albertii
ASV393845	A809585	0.002	11.8.2020	2020	Breeding	Finland	Hanko	59.8283	22.9659	Male	Young	k__Bacteria	p__Campylobacterota	c__Campylobacteria	o__Campylobacterales	f__Helicobacteraceae	g__Helicobacter	s__Helicobacter sp. 'B52D Seymour'
ASV394175	A810982	0.002	22.3.2021	2021	Spring	Finland	Hanko	59.8283	22.9659	Male	Adult	k__Bacteria	p__Firmicutes	c__Bacilli	o__Lactobacillales	f__Streptococcaceae	g__Streptococcus	s__
ASV396464	19_vantaa	0.002	13.10.2020	2020	Autumn	Finland	Lansinnatus	60.249	25.118	Male	Adult	k__Bacteria	p__Actinobacteriota	c__Actinobacteria	o__Corynebacteriales	f__Nocardiaceae	g__Nocardia	s__Nocardia veterana NBRC 100344
ASV396718	3_denmark	0.002	11.7.2020	2020	Breeding	Denmark	Svendborg	55.0557	Oct.31	Female	Adult	k__Bacteria	p__Firmicutes	c__Clostridia	o__Clostridiales	f__Clostridiaceae	g__Clostridium sensu stricto 1	s__Clostridium colicanis
ASV397126	1_denmark	0.002	11.7.2020	2020	Breeding	Denmark	Svendborg	55.0557	Oct.31	Male	Adult	k__Bacteria	p__Proteobacteria	c__Gammaproteobacteria	o__Pseudomonadales	f__Pseudomonadaceae	g__Pseudomonas	s__Pseudomonas sp. LG1E9
ASV398650	8A85322	0.002	20.7.2020	2020	Breeding	Denmark	Tinning Mose	56.266	9.957	Female	Adult	k__Bacteria	p__Firmicutes	c__Clostridia	o__Clostridiales	f__Clostridiaceae	g__Clostridium sensu stricto 1	s__
ASV400340	3_denmark	0.002	11.7.2020	2020	Breeding	Denmark	Svendborg	55.0557	Oct.31	Female	Adult	k__Bacteria	p__Proteobacteria	c__Gammaproteobacteria	o__Enterobacterales	f__Enterobacteriaceae	g__Escherichia-Shigella	s__Escherichia marmotae
ASV400464	8_chize	0.002	18.5.2021	2021	Breeding	France	Chize forest	46.1504	0.4242	Male	Unknown	k__Bacteria	p__Campylobacterota	c__Campylobacteria	o__Campylobacterales	f__Campylobacteraceae	g__Campylobacter	s__Campylobacter jejuni subsp. jejuni LMG 23211
ASV400499	1_vantaa	0.002	1.9.2020	2020	Breeding	Finland	Lansinnatus	60.249	25.118	Male	Young	k__Bacteria	p__Proteobacteria	c__Gammaproteobacteria	o__Pseudomonadales	f__Pseudomonadaceae	g__Pseudomonas	s__Pseudomonas sp. VTT E-052911
ASV400843	A811018	0.002	26.3.2021	2021	Spring	Finland	Hanko	59.8283	22.9659	Female	Adult	k__Bacteria	p__Proteobacteria	c__Gammaproteobacteria	o__Enterobacterales	f__Enterobacteriaceae	g__Escherichia-Shigella	s__Escherichia coli
ASV401482	A811018	0.002	26.3.2021	2021	Spring	Finland	Hanko	59.8283	22.9659	Female	Adult	k__Bacteria	p__Proteobacteria	c__Gammaproteobacteria	o__Enterobacterales	f__Enterobacteriaceae	g__Escherichia-Shigella	s__Escherichia albertii
ASV404069	14_chize	0.002	31.5.2021	2021	Breeding	France	Chize forest	46.1523	0.437	Female	Unknown	k__Bacteria	p__Actinobacteriota	c__Actinobacteria	o__Corynebacteriales	f__Mycobacteriaceae	g__Mycobacterium	s__
ASV407244	A810920	0.002	12.8.2020	2020	Breeding	Finland	Hanko	59.8283	22.9659	Male	Young	k__Bacteria	p__Proteobacteria	c__Gammaproteobacteria	o__Enterobacterales	f__Enterobacteriaceae	g__Escherichia-Shigella	s__Escherichia coli
ASV409764	11_vantaa	0.002	14.9.2020	2020	Breeding	Finland	Lansinnatus	60.249	25.118	Male	Adult	k__Bacteria	p__Firmicutes	c__Bacilli	o__Bacillales	f__Bacillaceae	g__Bacillus	s__
ASV409829	LV02	0.002	21.8.2020	2020	Breeding	Latvia	Pape	56.1625	21.0656	Female	Young	k__Bacteria	p__Proteobacteria	c__Gammaproteobacteria	o__Enterobacterales	f__Enterobacteriaceae	g__Escherichia-Shigella	s__Escherichia coli
ASV414035	A686078	0.002	4.6.2020	2020	Breeding	Finland	Karjaa	60.0715	23.662	Male	Adult	k__Bacteria	p__Proteobacteria	c__Gammaproteobacteria	o__Enterobacterales	f__Aeromonadaceae	g__Aeromonas	s__Aeromonas salmonicida subsp. salmonicida 01-B526
ASV414526	8A85322	0.002	20.7.2020	2020	Breeding	Denmark	Tinning Mose	56.266	9.957	Female	Adult	k__Bacteria	p__Campylobacterota	c__Campylobacteria	o__Campylobacterales	f__Campylobacteraceae	g__Campylobacter	s__Campylobacter jejuni subsp. jejuni LMG 23211
ASV416310	8E13246	0.002	Unknown	2020	NA	Denmark	Tinning Mose	56.266	9.957	Female	Adult	k__Bacteria	p__Proteobacteria	c__Gammaproteobacteria	o__Enterobacterales	f__Enterobacteriaceae	g__Escherichia-Shigella	s__Escherichia marmotae
ASV417973	8A85329	0.002	5.8.2020	2020	Breeding	Denmark	Tinning Mose	56.266	9.957	Male	Young	k__Bacteria	p__Proteobacteria	c__Gammaproteobacteria	o__Enterobacterales	f__Enterobacteriaceae	g__Escherichia-Shigella	s__Escherichia marmotae
ASV422687	LV30	0.002	25.9.2020	2020	Autumn	Latvia	Pape	56.1625	21.0656	Female	Young	k__Bacteria	p__Proteobacteria	c__Gammaproteobacteria	o__Enterobacterales	f__Enterobacteriaceae	g__Escherichia-Shigella	s__Escherichia marmotae
ASV423568	3_denmark	0.002	11.7.2020	2020	Breeding	Denmark	Svendborg	55.0557	Oct.31	Female	Adult	k__Bacteria	p__Proteobacteria	c__Gammaproteobacteria	o__Pseudomonadales	f__Pseudomonadaceae	g__Pseudomonas	s__Pseudomonas sp. R-41393
ASV424349	D26	0.002	20.5.2021	2021	Breeding	France	Chize forest	46.0979	0.4134	Female	Unknown	k__Bacteria	p__Actinobacteriota	c__Actinobacteria	o__Corynebacteriales	f__Mycobacteriaceae	g__Mycobacterium	s__
ASV424481	8A85329	0.002	5.8.2020	2020	Breeding	Denmark	Tinning Mose	56.266	9.957	Male	Young	k__Bacteria	p__Proteobacteria	c__Gammaproteobacteria	o__Pseudomonadales	f__Pseudomonadaceae	g__Pseudomonas	s__Pseudomonas versuta
ASV424851	2_denmark	0.002	11.7.2020	2020	Breeding	Denmark	Svendborg	55.0557	Oct.31	Male	Adult	k__Bacteria	p__Firmicutes	c__Bacilli	o__Bacillales	f__Bacillaceae	g__Bacillus	s__Bacillus longiquaesitum
ASV426371	14_vantaa	0.002	1.10.2020	2020	Autumn	Finland	Lansinnatus	60.249	25.118	Male	Adult	k__Bacteria	p__Campylobacterota	c__Campylobacteria	o__Campylobacterales	f__Campylobacteraceae	g__Campylobacter	s__Campylobacter jejuni subsp. jejuni LMG 23211
ASV427615	6_vantaa	0.002	2.9.2020	2020	Breeding	Finland	Lansinnatus	60.249	25.118	Male	Young	k__Bacteria	p__Proteobacteria	c__Gammaproteobacteria	o__Enterobacterales	f__Enterobacteriaceae	g__Escherichia-Shigella	s__Escherichia coli
ASV427793	8A85322	0.002	20.7.2020	2020	Breeding	Denmark	Tinning Mose	56.266	9.957	Female	Adult	k__Bacteria	p__Campylobacterota	c__Campylobacteria	o__Campylobacterales	f__Campylobacteraceae	g__Campylobacter	s__Campylobacter jejuni subsp. jejuni LMG 23211
ASV428444	8A85324	0.002	30.7.2020	2020	Breeding	Denmark	Tinning Mose	56.266	9.957	Male	Adult	k__Bacteria	p__Proteobacteria	c__Gammaproteobacteria	o__Enterobacterales	f__Enterobacteriaceae	g__Escherichia-Shigella	s__Escherichia marmotae
ASV428481	D26	0.002	20.5.2021	2021	Breeding	France	Chize forest	46.0979	0.4134	Female	Unknown	k__Bacteria	p__Firmicutes	c__Clostridia	o__Clostridiales	f__Clostridiaceae	g__Clostridium sensu stricto 1	s__Clostridium sp. Marseille-P2414
ASV430027	A686068	0.002	5.10.2020	2020	Autumn	Finland	Karjaa	60.0715	23.662	Male	Young	k__Bacteria	p__Firmicutes	c__Bacilli	o__Mycoplasmatales	f__Mycoplasmataceae	g__Mycoplasma	s__Mycoplasma moatsii ATCC 27625
ASV430550	D27	0.002	27.5.2021	2021	Breeding	France	Chize forest	46.0951	0.4133	Female	Unknown	k__Bacteria	p__Firmicutes	c__Clostridia	o__Clostridiales	f__Clostridiaceae	g__Clostridium sensu stricto 1	s__Clostridium sp. Marseille-P2414
ASV430966	1_denmark	0.002	11.7.2020	2020	Breeding	Denmark	Svendborg	55.0557	Oct.31	Male	Adult	k__Bacteria	p__Proteobacteria	c__Gammaproteobacteria	o__Enterobacterales	f__Enterobacteriaceae	g__Escherichia-Shigella	s__Escherichia marmotae
ASV432903	A810992	0.002	25.3.2021	2021	Spring	Finland	Hanko	59.8283	22.9659	Female	Adult	k__Bacteria	p__Firmicutes	c__Bacilli	o__Mycoplasmatales	f__Mycoplasmataceae	g__Ureaplasma	s__
ASV432969	10_chize	0.002	20.5.2021	2021	Breeding	France	Chize forest	46.1578	0.4308	Male	Unknown	k__Bacteria	p__Firmicutes	c__Bacilli	o__Mycoplasmatales	f__Mycoplasmataceae	g__Ureaplasma	s__
ASV433005	A810983	0.002	23.3.2021	2021	Spring	Finland	Hanko	59.8283	22.9659	Male	Adult	k__Bacteria	p__Campylobacterota	c__Campylobacteria	o__Campylobacterales	f__Campylobacteraceae	g__Campylobacter	s__Campylobacter jejuni
ASV433332	8A85322	0.002	20.7.2020	2020	Breeding	Denmark	Tinning Mose	56.266	9.957	Female	Adult	k__Bacteria	p__Campylobacterota	c__Campylobacteria	o__Campylobacterales	f__Campylobacteraceae	g__Campylobacter	s__Campylobacter sp. RM16704
ASV434941	LV29	0.002	23.9.2020	2020	Autumn	Latvia	Pape	56.1625	21.0656	Female	Young	k__Bacteria	p__Proteobacteria	c__Gammaproteobacteria	o__Enterobacterales	f__Enterobacteriaceae	g__Escherichia-Shigella	s__Escherichia marmotae
ASV435491	8A85322	0.002	20.7.2020	2020	Breeding	Denmark	Tinning Mose	56.266	9.957	Female	Adult	k__Bacteria	p__Proteobacteria	c__Gammaproteobacteria	o__Enterobacterales	f__Enterobacteriaceae	g__Escherichia-Shigella	s__Escherichia marmotae
ASV437350	8E13246	0.002	Unknown	2020	NA	Denmark	Tinning Mose	56.266	9.957	Female	Adult	k__Bacteria	p__Proteobacteria	c__Gammaproteobacteria	o__Pseudomonadales	f__Pseudomonadaceae	g__Pseudomonas	s__
ASV437874	8A85322	0.002	20.7.2020	2020	Breeding	Denmark	Tinning Mose	56.266	9.957	Female	Adult	k__Bacteria	p__Proteobacteria	c__Gammaproteobacteria	o__Enterobacterales	f__Enterobacteriaceae	g__Escherichia-Shigella	s__Escherichia marmotae
ASV438439	6_denmark	0.002	21.7.2020	2020	Breeding	Denmark	Svendborg	55.0557	Oct.31	Unknown	Young	k__Bacteria	p__Firmicutes	c__Bacilli	o__Mycoplasmatales	f__Mycoplasmataceae	g__Mycoplasma	s__Mycoplasma penetrans HF-2
ASV438750	LV09	0.002	17.9.2020	2020	Autumn	Latvia	Pape	56.1625	21.0656	Male	Young	k__Bacteria	p__Firmicutes	c__Bacilli	o__Lactobacillales	f__Enterococcaceae	g__Enterococcus	s__Enterococcus cecorum DSM 20682 = ATCC 43198
ASV439588	1_denmark	0.002	11.7.2020	2020	Breeding	Denmark	Svendborg	55.0557	Oct.31	Male	Adult	k__Bacteria	p__Proteobacteria	c__Gammaproteobacteria	o__Pseudomonadales	f__Pseudomonadaceae	g__Pseudomonas	s__Pseudomonas sp. FDAARGOS_380
ASV440205	7_vantaa	0.002	2.9.2020	2020	Breeding	Finland	Lansinnatus	60.249	25.118	Male	Young	k__Bacteria	p__Proteobacteria	c__Gammaproteobacteria	o__Pseudomonadales	f__Pseudomonadaceae	g__Pseudomonas	s__Pseudomonas migulae
ASV441099	15_denmark	0.002	20.9.2020	2020	Autumn	Denmark	Hjulby	55.3422	Oct.66	Male	Young	k__Bacteria	p__Campylobacterota	c__Campylobacteria	o__Campylobacterales	f__Campylobacteraceae	g__Campylobacter	s__Campylobacter helveticus
ASV441444	VD_01	0.002	27.7.2020	2020	Breeding	Denmark	Tinning Mose	56.266	9.957	Female	Young	k__Bacteria	p__Proteobacteria	c__Gammaproteobacteria	o__Enterobacterales	f__Enterobacteriaceae	g__Escherichia-Shigella	s__Escherichia marmotae
ASV442049	3_denmark	0.002	11.7.2020	2020	Breeding	Denmark	Svendborg	55.0557	Oct.31	Female	Adult	k__Bacteria	p__Firmicutes	c__Clostridia	o__Clostridiales	f__Clostridiaceae	g__Clostridium sensu stricto 1	s__
ASV442734	A810982	0.002	22.3.2021	2021	Spring	Finland	Hanko	59.8283	22.9659	Male	Adult	k__Bacteria	p__Firmicutes	c__Bacilli	o__Lactobacillales	f__Streptococcaceae	g__Streptococcus	s__Streptococcus equinus ATCC 700338
ASV443116	13_vantaa	0.002	1.10.2020	2020	Autumn	Finland	Lansinnatus	60.249	25.118	Male	Adult	k__Bacteria	p__Proteobacteria	c__Gammaproteobacteria	o__Enterobacterales	f__Enterobacteriaceae	g__Escherichia-Shigella	s__Escherichia marmotae
ASV443487	12_denmark	0.002	16.8.2020	2020	Breeding	Denmark	Bagenkop	54.728	Oct.52	Unknown	Young	k__Bacteria	p__Proteobacteria	c__Gammaproteobacteria	o__Pseudomonadales	f__Pseudomonadaceae	g__Pseudomonas	s__Pseudomonas lurida
ASV444079	A811018	0.002	26.3.2021	2021	Spring	Finland	Hanko	59.8283	22.9659	Female	Adult	k__Bacteria	p__Proteobacteria	c__Gammaproteobacteria	o__Enterobacterales	f__Enterobacteriaceae	g__Escherichia-Shigella	s__Escherichia coli 55989
ASV445258	A810982	0.002	22.3.2021	2021	Spring	Finland	Hanko	59.8283	22.9659	Male	Adult	k__Bacteria	p__Proteobacteria	c__Gammaproteobacteria	o__Enterobacterales	f__Enterobacteriaceae	g__Escherichia-Shigella	s__Escherichia marmotae
ASV000003	6_vantaa	0.001	2.9.2020	2020	Breeding	Finland	Lansinnatus	60.249	25.118	Male	Young	k__Bacteria	p__Campylobacterota	c__Campylobacteria	o__Campylobacterales	f__Campylobacteraceae	g__Campylobacter	s__Campylobacter jejuni subsp. jejuni LMG 23211
ASV000003	7_denmark	0.001	21.7.2020	2020	Breeding	Denmark	Svendborg	55.0557	Oct.31	Female	Adult	k__Bacteria	p__Campylobacterota	c__Campylobacteria	o__Campylobacterales	f__Campylobacteraceae	g__Campylobacter	s__Campylobacter jejuni subsp. jejuni LMG 23211
ASV000007	A810987	0.001	24.3.2021	2021	Spring	Finland	Hanko	59.8283	22.9659	Male	Adult	k__Bacteria	p__Proteobacteria	c__Gammaproteobacteria	o__Enterobacterales	f__Enterobacteriaceae	g__Escherichia-Shigella	s__Escherichia marmotae
ASV000007	A809583	0.001	9.8.2020	2020	Breeding	Finland	Hanko	59.8283	22.9659	Male	Young	k__Bacteria	p__Proteobacteria	c__Gammaproteobacteria	o__Enterobacterales	f__Enterobacteriaceae	g__Escherichia-Shigella	s__Escherichia marmotae
ASV000007	1_vantaa	0.001	1.9.2020	2020	Breeding	Finland	Lansinnatus	60.249	25.118	Male	Young	k__Bacteria	p__Proteobacteria	c__Gammaproteobacteria	o__Enterobacterales	f__Enterobacteriaceae	g__Escherichia-Shigella	s__Escherichia marmotae
ASV000008	D2	0.001	12.5.2021	2021	Breeding	France	Chize forest	46.1269	0.4244	Male	Unknown	k__Bacteria	p__Campylobacterota	c__Campylobacteria	o__Campylobacterales	f__Campylobacteraceae	g__Campylobacter	s__Campylobacter sp. RM16704
ASV000017	12_denmark	0.001	16.8.2020	2020	Breeding	Denmark	Bagenkop	54.728	Oct.52	Unknown	Young	k__Bacteria	p__Proteobacteria	c__Gammaproteobacteria	o__Enterobacterales	f__Enterobacteriaceae	g__Escherichia-Shigella	s__Escherichia marmotae
ASV000053	D26	0.001	20.5.2021	2021	Breeding	France	Chize forest	46.0979	0.4134	Female	Unknown	k__Bacteria	p__Proteobacteria	c__Gammaproteobacteria	o__Enterobacterales	f__Enterobacteriaceae	g__Escherichia-Shigella	s__Escherichia coli
ASV000068	8A85322	0.001	20.7.2020	2020	Breeding	Denmark	Tinning Mose	56.266	9.957	Female	Adult	k__Bacteria	p__Firmicutes	c__Bacilli	o__Mycoplasmatales	f__Mycoplasmataceae	g__Mycoplasma	s__Mycoplasma penetrans HF-2
ASV000068	A810988	0.001	24.3.2021	2021	Spring	Finland	Hanko	59.8283	22.9659	Male	Adult	k__Bacteria	p__Firmicutes	c__Bacilli	o__Mycoplasmatales	f__Mycoplasmataceae	g__Mycoplasma	s__Mycoplasma penetrans HF-2
ASV000068	VD_01	0.001	27.7.2020	2020	Breeding	Denmark	Tinning Mose	56.266	9.957	Female	Young	k__Bacteria	p__Firmicutes	c__Bacilli	o__Mycoplasmatales	f__Mycoplasmataceae	g__Mycoplasma	s__Mycoplasma penetrans HF-2
ASV000068	A811018	0.001	26.3.2021	2021	Spring	Finland	Hanko	59.8283	22.9659	Female	Adult	k__Bacteria	p__Firmicutes	c__Bacilli	o__Mycoplasmatales	f__Mycoplasmataceae	g__Mycoplasma	s__Mycoplasma penetrans HF-2
ASV000068	16_denmark	0.001	22.9.2020	2020	Autumn	Denmark	Bagenkop	54.728	Oct.52	Male	Young	k__Bacteria	p__Firmicutes	c__Bacilli	o__Mycoplasmatales	f__Mycoplasmataceae	g__Mycoplasma	s__Mycoplasma penetrans HF-2
ASV000087	LV29	0.001	23.9.2020	2020	Autumn	Latvia	Pape	56.1625	21.0656	Female	Young	k__Bacteria	p__Proteobacteria	c__Gammaproteobacteria	o__Enterobacterales	f__Enterobacteriaceae	g__Escherichia-Shigella	s__Escherichia albertii
ASV000089	A811018	0.001	26.3.2021	2021	Spring	Finland	Hanko	59.8283	22.9659	Female	Adult	k__Bacteria	p__Firmicutes	c__Bacilli	o__Mycoplasmatales	f__Mycoplasmataceae	g__Mycoplasma	s__Mycoplasma penetrans HF-2
ASV000089	A686083	0.001	25.9.2020	2020	Autumn	Finland	Karjaa	60.0715	23.662	Male	Young	k__Bacteria	p__Firmicutes	c__Bacilli	o__Mycoplasmatales	f__Mycoplasmataceae	g__Mycoplasma	s__Mycoplasma penetrans HF-2
ASV000097	12_denmark	0.001	16.8.2020	2020	Breeding	Denmark	Bagenkop	54.728	Oct.52	Unknown	Young	k__Bacteria	p__Proteobacteria	c__Gammaproteobacteria	o__Enterobacterales	f__Enterobacteriaceae	g__Escherichia-Shigella	s__Escherichia coli
ASV000106	LV02	0.001	21.8.2020	2020	Breeding	Latvia	Pape	56.1625	21.0656	Female	Young	k__Bacteria	p__Proteobacteria	c__Gammaproteobacteria	o__Enterobacterales	f__Enterobacteriaceae	g__Escherichia-Shigella	s__Escherichia coli
ASV000129	A810920	0.001	12.8.2020	2020	Breeding	Finland	Hanko	59.8283	22.9659	Male	Young	k__Bacteria	p__Campylobacterota	c__Campylobacteria	o__Campylobacterales	f__Helicobacteraceae	g__Helicobacter	s__Helicobacter sp. 'B52D Seymour'
ASV000134	A686068	0.001	5.10.2020	2020	Autumn	Finland	Karjaa	60.0715	23.662	Male	Young	k__Bacteria	p__Proteobacteria	c__Gammaproteobacteria	o__Enterobacterales	f__Enterobacteriaceae	g__Escherichia-Shigella	s__Escherichia coli
ASV000156	6_denmark	0.001	21.7.2020	2020	Breeding	Denmark	Svendborg	55.0557	Oct.31	Unknown	Young	k__Bacteria	p__Proteobacteria	c__Gammaproteobacteria	o__Pseudomonadales	f__Pseudomonadaceae	g__Pseudomonas	s__Pseudomonas yamanorum
ASV000156	D2	0.001	12.5.2021	2021	Breeding	France	Chize forest	46.1269	0.4244	Male	Unknown	k__Bacteria	p__Proteobacteria	c__Gammaproteobacteria	o__Pseudomonadales	f__Pseudomonadaceae	g__Pseudomonas	s__Pseudomonas yamanorum
ASV000156	A809583	0.001	9.8.2020	2020	Breeding	Finland	Hanko	59.8283	22.9659	Male	Young	k__Bacteria	p__Proteobacteria	c__Gammaproteobacteria	o__Pseudomonadales	f__Pseudomonadaceae	g__Pseudomonas	s__Pseudomonas yamanorum
ASV000156	11_vantaa	0.001	14.9.2020	2020	Breeding	Finland	Lansinnatus	60.249	25.118	Male	Adult	k__Bacteria	p__Proteobacteria	c__Gammaproteobacteria	o__Pseudomonadales	f__Pseudomonadaceae	g__Pseudomonas	s__Pseudomonas yamanorum
ASV000156	LV31	0.001	26.9.2020	2020	Autumn	Latvia	Pape	56.1625	21.0656	Male	Young	k__Bacteria	p__Proteobacteria	c__Gammaproteobacteria	o__Pseudomonadales	f__Pseudomonadaceae	g__Pseudomonas	s__Pseudomonas yamanorum
ASV000158	6_denmark	0.001	21.7.2020	2020	Breeding	Denmark	Svendborg	55.0557	Oct.31	Unknown	Young	k__Bacteria	p__Proteobacteria	c__Gammaproteobacteria	o__Enterobacterales	f__Yersiniaceae	g__Serratia	s__Serratia proteamaculans 568
ASV000169	A811018	0.001	26.3.2021	2021	Spring	Finland	Hanko	59.8283	22.9659	Female	Adult	k__Bacteria	p__Firmicutes	c__Clostridia	o__Clostridiales	f__Clostridiaceae	g__Clostridium sensu stricto 1	s__Clostridium sp. Marseille-P2414
ASV000179	A686083	0.001	25.9.2020	2020	Autumn	Finland	Karjaa	60.0715	23.662	Male	Young	k__Bacteria	p__Campylobacterota	c__Campylobacteria	o__Campylobacterales	f__Campylobacteraceae	g__Campylobacter	s__Campylobacter jejuni subsp. jejuni LMG 23269
ASV000179	A686080	0.001	23.9.2020	2020	Autumn	Finland	Karjaa	60.0715	23.662	Male	Young	k__Bacteria	p__Campylobacterota	c__Campylobacteria	o__Campylobacterales	f__Campylobacteraceae	g__Campylobacter	s__Campylobacter jejuni subsp. jejuni LMG 23269
ASV000193	2_vantaa	0.001	2.9.2020	2020	Breeding	Finland	Lansinnatus	60.249	25.118	Male	Young	k__Bacteria	p__Proteobacteria	c__Gammaproteobacteria	o__Enterobacterales	f__Enterobacteriaceae	g__Escherichia-Shigella	s__Escherichia coli
ASV000211	LV31	0.001	26.9.2020	2020	Autumn	Latvia	Pape	56.1625	21.0656	Male	Young	k__Bacteria	p__Proteobacteria	c__Gammaproteobacteria	o__Enterobacterales	f__Enterobacteriaceae	g__Escherichia-Shigella	s__Escherichia coli
ASV000211	7_vantaa	0.001	2.9.2020	2020	Breeding	Finland	Lansinnatus	60.249	25.118	Male	Young	k__Bacteria	p__Proteobacteria	c__Gammaproteobacteria	o__Enterobacterales	f__Enterobacteriaceae	g__Escherichia-Shigella	s__Escherichia coli
ASV000256	LV30	0.001	25.9.2020	2020	Autumn	Latvia	Pape	56.1625	21.0656	Female	Young	k__Bacteria	p__Firmicutes	c__Bacilli	o__Staphylococcales	f__Staphylococcaceae	g__Staphylococcus	s__Staphylococcus agnetis
ASV000258	19_vantaa	0.001	13.10.2020	2020	Autumn	Finland	Lansinnatus	60.249	25.118	Male	Adult	k__Bacteria	p__Firmicutes	c__Bacilli	o__Lactobacillales	f__Enterococcaceae	g__Enterococcus	s__Enterococcus faecalis ATCC 27275
ASV000258	8E13246	0.001	Unknown	2020	NA	Denmark	Tinning Mose	56.266	9.957	Female	Adult	k__Bacteria	p__Firmicutes	c__Bacilli	o__Lactobacillales	f__Enterococcaceae	g__Enterococcus	s__Enterococcus faecalis ATCC 27275
ASV000288	A686081	0.001	24.9.2020	2020	Autumn	Finland	Karjaa	60.0715	23.662	Male	Young	k__Bacteria	p__Proteobacteria	c__Gammaproteobacteria	o__Enterobacterales	f__Enterobacteriaceae	g__Escherichia-Shigella	s__Escherichia coli
ASV000423	D26	0.001	20.5.2021	2021	Breeding	France	Chize forest	46.0979	0.4134	Female	Unknown	k__Bacteria	p__Firmicutes	c__Clostridia	o__Clostridiales	f__Clostridiaceae	g__Clostridium sensu stricto 1	s__Clostridium perfringens NCTC 8239
ASV000474	15_denmark	0.001	20.9.2020	2020	Autumn	Denmark	Hjulby	55.3422	Oct.66	Male	Young	k__Bacteria	p__Proteobacteria	c__Gammaproteobacteria	o__Enterobacterales	f__Enterobacteriaceae	g__Escherichia-Shigella	s__Escherichia coli
ASV000648	A811018	0.001	26.3.2021	2021	Spring	Finland	Hanko	59.8283	22.9659	Female	Adult	k__Bacteria	p__Proteobacteria	c__Gammaproteobacteria	o__Enterobacterales	f__Enterobacteriaceae	g__Escherichia-Shigella	s__Escherichia coli
ASV000657	A686081	0.001	24.9.2020	2020	Autumn	Finland	Karjaa	60.0715	23.662	Male	Young	k__Bacteria	p__Firmicutes	c__Bacilli	o__Lactobacillales	f__Enterococcaceae	g__Enterococcus	s__Enterococcus faecium ATCC 8459
ASV000683	7_denmark	0.001	21.7.2020	2020	Breeding	Denmark	Svendborg	55.0557	Oct.31	Female	Adult	k__Bacteria	p__Proteobacteria	c__Gammaproteobacteria	o__Pseudomonadales	f__Moraxellaceae	g__Acinetobacter	s__
ASV000690	A686078	0.001	4.6.2020	2020	Breeding	Finland	Karjaa	60.0715	23.662	Male	Adult	k__Bacteria	p__Campylobacterota	c__Campylobacteria	o__Campylobacterales	f__Campylobacteraceae	g__Campylobacter	s__Campylobacter jejuni subsp. jejuni LMG 23269
ASV000732	9_chize	0.001	20.5.2021	2021	Breeding	France	Chize forest	46.1523	0.437	Male	Unknown	k__Bacteria	p__Firmicutes	c__Clostridia	o__Clostridiales	f__Clostridiaceae	g__Clostridium sensu stricto 1	s__Clostridium sp. Marseille-P2414
ASV000742	A809585	0.001	11.8.2020	2020	Breeding	Finland	Hanko	59.8283	22.9659	Male	Young	k__Bacteria	p__Proteobacteria	c__Gammaproteobacteria	o__Pseudomonadales	f__Pseudomonadaceae	g__Pseudomonas	s__Pseudomonas yamanorum
ASV000773	A811018	0.001	26.3.2021	2021	Spring	Finland	Hanko	59.8283	22.9659	Female	Adult	k__Bacteria	p__Proteobacteria	c__Gammaproteobacteria	o__Enterobacterales	f__Enterobacteriaceae	g__Escherichia-Shigella	s__Escherichia coli
ASV000798	A686078	0.001	4.6.2020	2020	Breeding	Finland	Karjaa	60.0715	23.662	Male	Adult	k__Bacteria	p__Firmicutes	c__Bacilli	o__Mycoplasmatales	f__Mycoplasmataceae	g__Mycoplasma	s__Mycoplasma moatsii ATCC 27625
ASV000805	A811018	0.001	26.3.2021	2021	Spring	Finland	Hanko	59.8283	22.9659	Female	Adult	k__Bacteria	p__Proteobacteria	c__Gammaproteobacteria	o__Enterobacterales	f__Enterobacteriaceae	g__Escherichia-Shigella	s__Escherichia coli
ASV000836	D2	0.001	12.5.2021	2021	Breeding	France	Chize forest	46.1269	0.4244	Male	Unknown	k__Bacteria	p__Firmicutes	c__Bacilli	o__Mycoplasmatales	f__Mycoplasmataceae	g__Ureaplasma	s__
ASV000918	14_chize	0.001	31.5.2021	2021	Breeding	France	Chize forest	46.1523	0.437	Female	Unknown	k__Bacteria	p__Proteobacteria	c__Gammaproteobacteria	o__Pseudomonadales	f__Pseudomonadaceae	g__Pseudomonas	s__Pseudomonas sp. M30-35
ASV000951	15_denmark	0.001	20.9.2020	2020	Autumn	Denmark	Hjulby	55.3422	Oct.66	Male	Young	k__Bacteria	p__Proteobacteria	c__Gammaproteobacteria	o__Pseudomonadales	f__Pseudomonadaceae	g__Pseudomonas	s__Pseudomonas sp. S09G 359
ASV000951	8A85329	0.001	5.8.2020	2020	Breeding	Denmark	Tinning Mose	56.266	9.957	Male	Young	k__Bacteria	p__Proteobacteria	c__Gammaproteobacteria	o__Pseudomonadales	f__Pseudomonadaceae	g__Pseudomonas	s__Pseudomonas sp. S09G 359
ASV000951	7_denmark	0.001	21.7.2020	2020	Breeding	Denmark	Svendborg	55.0557	Oct.31	Female	Adult	k__Bacteria	p__Proteobacteria	c__Gammaproteobacteria	o__Pseudomonadales	f__Pseudomonadaceae	g__Pseudomonas	s__Pseudomonas sp. S09G 359
ASV001216	LV36	0.001	28.9.2020	2020	Autumn	Latvia	Pape	56.1625	21.0656	Female	Young	k__Bacteria	p__Firmicutes	c__Bacilli	o__Mycoplasmatales	f__Mycoplasmataceae	g__Ureaplasma	s__
ASV001346	D27	0.001	27.5.2021	2021	Breeding	France	Chize forest	46.0951	0.4133	Female	Unknown	k__Bacteria	p__Firmicutes	c__Clostridia	o__Clostridiales	f__Clostridiaceae	g__Clostridium sensu stricto 1	s__Clostridium sp. Marseille-P2414
ASV001352	A686083	0.001	25.9.2020	2020	Autumn	Finland	Karjaa	60.0715	23.662	Male	Young	k__Bacteria	p__Proteobacteria	c__Gammaproteobacteria	o__Enterobacterales	f__Enterobacteriaceae	g__Citrobacter	s__Citrobacter werkmanii
ASV001352	16_denmark	0.001	22.9.2020	2020	Autumn	Denmark	Bagenkop	54.728	Oct.52	Male	Young	k__Bacteria	p__Proteobacteria	c__Gammaproteobacteria	o__Enterobacterales	f__Enterobacteriaceae	g__Citrobacter	s__Citrobacter werkmanii
ASV001694	LV02	0.001	21.8.2020	2020	Breeding	Latvia	Pape	56.1625	21.0656	Female	Young	k__Bacteria	p__Proteobacteria	c__Gammaproteobacteria	o__Enterobacterales	f__Enterobacteriaceae	g__Escherichia-Shigella	s__Escherichia coli
ASV001701	9_denmark	0.001	21.7.2020	2020	Breeding	Denmark	Svendborg	55.0557	Oct.31	Female	Adult	k__Bacteria	p__Firmicutes	c__Bacilli	o__Bacillales	f__Bacillaceae	g__Bacillus	s__Bacillus mycoides DSM 2048
ASV001834	LV32	0.001	27.9.2020	2020	Autumn	Latvia	Pape	56.1625	21.0656	Female	Young	k__Bacteria	p__Firmicutes	c__Bacilli	o__Staphylococcales	f__Staphylococcaceae	g__Staphylococcus	s__Staphylococcus agnetis
ASV001904	A809585	0.001	11.8.2020	2020	Breeding	Finland	Hanko	59.8283	22.9659	Male	Young	k__Bacteria	p__Actinobacteriota	c__Actinobacteria	o__Corynebacteriales	f__Mycobacteriaceae	g__Mycobacterium	s__
ASV002084	A686067	0.001	31.5.2020	2020	Breeding	Finland	Karjaa	60.0715	23.662	Male	Adult	k__Bacteria	p__Firmicutes	c__Clostridia	o__Clostridiales	f__Clostridiaceae	g__Clostridium sensu stricto 1	s__Clostridium sp. Marseille-P2414
ASV002165	2_denmark	0.001	11.7.2020	2020	Breeding	Denmark	Svendborg	55.0557	Oct.31	Male	Adult	k__Bacteria	p__Proteobacteria	c__Gammaproteobacteria	o__Pseudomonadales	f__Pseudomonadaceae	g__Pseudomonas	s__Pseudomonas sp. MYb193
ASV002165	1_denmark	0.001	11.7.2020	2020	Breeding	Denmark	Svendborg	55.0557	Oct.31	Male	Adult	k__Bacteria	p__Proteobacteria	c__Gammaproteobacteria	o__Pseudomonadales	f__Pseudomonadaceae	g__Pseudomonas	s__Pseudomonas sp. MYb193
ASV002303	6_vantaa	0.001	2.9.2020	2020	Breeding	Finland	Lansinnatus	60.249	25.118	Male	Young	k__Bacteria	p__Proteobacteria	c__Gammaproteobacteria	o__Enterobacterales	f__Enterobacteriaceae	g__Escherichia-Shigella	s__Escherichia coli
ASV002612	1_vantaa	0.001	1.9.2020	2020	Breeding	Finland	Lansinnatus	60.249	25.118	Male	Young	k__Bacteria	p__Actinobacteriota	c__Actinobacteria	o__Corynebacteriales	f__Mycobacteriaceae	g__Mycobacterium	s__
ASV002622	2_denmark	0.001	11.7.2020	2020	Breeding	Denmark	Svendborg	55.0557	Oct.31	Male	Adult	k__Bacteria	p__Actinobacteriota	c__Actinobacteria	o__Corynebacteriales	f__Mycobacteriaceae	g__Mycobacterium	s__
ASV002717	A810992	0.001	25.3.2021	2021	Spring	Finland	Hanko	59.8283	22.9659	Female	Adult	k__Bacteria	p__Campylobacterota	c__Campylobacteria	o__Campylobacterales	f__Campylobacteraceae	g__Campylobacter	s__Campylobacter jejuni
ASV002750	A686080	0.001	23.9.2020	2020	Autumn	Finland	Karjaa	60.0715	23.662	Male	Young	k__Bacteria	p__Proteobacteria	c__Gammaproteobacteria	o__Enterobacterales	f__Enterobacteriaceae	g__Escherichia-Shigella	s__Escherichia coli
ASV002843	A810992	0.001	25.3.2021	2021	Spring	Finland	Hanko	59.8283	22.9659	Female	Adult	k__Bacteria	p__Proteobacteria	c__Gammaproteobacteria	o__Pseudomonadales	f__Pseudomonadaceae	g__Pseudomonas	s__Pseudomonas putida
ASV003024	LV30	0.001	25.9.2020	2020	Autumn	Latvia	Pape	56.1625	21.0656	Female	Young	k__Bacteria	p__Campylobacterota	c__Campylobacteria	o__Campylobacterales	f__Campylobacteraceae	g__Campylobacter	s__Campylobacter jejuni subsp. jejuni LMG 23211
ASV003244	12_denmark	0.001	16.8.2020	2020	Breeding	Denmark	Bagenkop	54.728	Oct.52	Unknown	Young	k__Bacteria	p__Firmicutes	c__Bacilli	o__Lactobacillales	f__Enterococcaceae	g__Enterococcus	s__Enterococcus flavescens ATCC 49996
ASV003535	14_chize	0.001	31.5.2021	2021	Breeding	France	Chize forest	46.1523	0.437	Female	Unknown	k__Bacteria	p__Firmicutes	c__Bacilli	o__Mycoplasmatales	f__Mycoplasmataceae	g__Ureaplasma	s__
ASV003628	LV47	0.001	30.9.2020	2020	Autumn	Latvia	Pape	56.1625	21.0656	Female	Young	k__Bacteria	p__Campylobacterota	c__Campylobacteria	o__Campylobacterales	f__Helicobacteraceae	g__Helicobacter	s__Helicobacter anseris
ASV003747	13_vantaa	0.001	1.10.2020	2020	Autumn	Finland	Lansinnatus	60.249	25.118	Male	Adult	k__Bacteria	p__Campylobacterota	c__Campylobacteria	o__Campylobacterales	f__Campylobacteraceae	g__Campylobacter	s__Campylobacter jejuni subsp. jejuni LMG 23211
ASV003747	LV24	0.001	20.9.2020	2020	Autumn	Latvia	Pape	56.1625	21.0656	Male	Adult	k__Bacteria	p__Campylobacterota	c__Campylobacteria	o__Campylobacterales	f__Campylobacteraceae	g__Campylobacter	s__Campylobacter jejuni subsp. jejuni LMG 23211
ASV003896	A810994	0.001	26.3.2021	2021	Spring	Finland	Hanko	59.8283	22.9659	Female	Adult	k__Bacteria	p__Actinobacteriota	c__Actinobacteria	o__Corynebacteriales	f__Mycobacteriaceae	g__Mycobacterium	s__
ASV003904	D15	0.001	18.5.2021	2021	Breeding	France	Chize forest	46.1319	0.4387	Male	Unknown	k__Bacteria	p__Firmicutes	c__Bacilli	o__Mycoplasmatales	f__Mycoplasmataceae	g__Mycoplasma	s__Mycoplasma penetrans HF-2
ASV003904	D28	0.001	31.5.2021	2021	Breeding	France	Chize forest	46.1201	0.4585	Male	Unknown	k__Bacteria	p__Firmicutes	c__Bacilli	o__Mycoplasmatales	f__Mycoplasmataceae	g__Mycoplasma	s__Mycoplasma penetrans HF-2
ASV003904	14_chize	0.001	31.5.2021	2021	Breeding	France	Chize forest	46.1523	0.437	Female	Unknown	k__Bacteria	p__Firmicutes	c__Bacilli	o__Mycoplasmatales	f__Mycoplasmataceae	g__Mycoplasma	s__Mycoplasma penetrans HF-2
ASV004006	8A85322	0.001	20.7.2020	2020	Breeding	Denmark	Tinning Mose	56.266	9.957	Female	Adult	k__Bacteria	p__Proteobacteria	c__Gammaproteobacteria	o__Enterobacterales	f__Enterobacteriaceae	g__Escherichia-Shigella	s__Escherichia marmotae
ASV004034	14_vantaa	0.001	1.10.2020	2020	Autumn	Finland	Lansinnatus	60.249	25.118	Male	Adult	k__Bacteria	p__Proteobacteria	c__Gammaproteobacteria	o__Legionellales	f__Legionellaceae	g__Legionella	s__
ASV004288	LV24	0.001	20.9.2020	2020	Autumn	Latvia	Pape	56.1625	21.0656	Male	Adult	k__Bacteria	p__Campylobacterota	c__Campylobacteria	o__Campylobacterales	f__Campylobacteraceae	g__Campylobacter	s__Campylobacter jejuni subsp. jejuni LMG 23211
ASV004288	LV02	0.001	21.8.2020	2020	Breeding	Latvia	Pape	56.1625	21.0656	Female	Young	k__Bacteria	p__Campylobacterota	c__Campylobacteria	o__Campylobacterales	f__Campylobacteraceae	g__Campylobacter	s__Campylobacter jejuni subsp. jejuni LMG 23211
ASV004310	A686068	0.001	5.10.2020	2020	Autumn	Finland	Karjaa	60.0715	23.662	Male	Young	k__Bacteria	p__Campylobacterota	c__Campylobacteria	o__Campylobacterales	f__Campylobacteraceae	g__Campylobacter	s__Campylobacter jejuni subsp. jejuni LMG 23211
ASV004317	16_denmark	0.001	22.9.2020	2020	Autumn	Denmark	Bagenkop	54.728	Oct.52	Male	Young	k__Bacteria	p__Proteobacteria	c__Gammaproteobacteria	o__Enterobacterales	f__Enterobacteriaceae	g__Escherichia-Shigella	s__Escherichia marmotae
ASV004351	LV29	0.001	23.9.2020	2020	Autumn	Latvia	Pape	56.1625	21.0656	Female	Young	k__Bacteria	p__Proteobacteria	c__Gammaproteobacteria	o__Enterobacterales	f__Enterobacteriaceae	g__Escherichia-Shigella	s__Escherichia marmotae
ASV004388	6_vantaa	0.001	2.9.2020	2020	Breeding	Finland	Lansinnatus	60.249	25.118	Male	Young	k__Bacteria	p__Actinobacteriota	c__Actinobacteria	o__Corynebacteriales	f__Mycobacteriaceae	g__Mycobacterium	s__
ASV004404	D13	0.001	18.5.2021	2021	Breeding	France	Chize forest	46.1126	0.4495	Male	Unknown	k__Bacteria	p__Proteobacteria	c__Gammaproteobacteria	o__Pseudomonadales	f__Pseudomonadaceae	g__Pseudomonas	s__
ASV004541	A810992	0.001	25.3.2021	2021	Spring	Finland	Hanko	59.8283	22.9659	Female	Adult	k__Bacteria	p__Firmicutes	c__Bacilli	o__Bacillales	f__Bacillaceae	g__Bacillus	s__Bacillus megaterium NCT-2
ASV004576	A686078	0.001	4.6.2020	2020	Breeding	Finland	Karjaa	60.0715	23.662	Male	Adult	k__Bacteria	p__Campylobacterota	c__Campylobacteria	o__Campylobacterales	f__Campylobacteraceae	g__Campylobacter	s__Campylobacter sp. RM16704
ASV004576	A686067	0.001	31.5.2020	2020	Breeding	Finland	Karjaa	60.0715	23.662	Male	Adult	k__Bacteria	p__Campylobacterota	c__Campylobacteria	o__Campylobacterales	f__Campylobacteraceae	g__Campylobacter	s__Campylobacter sp. RM16704
ASV004588	VD_01	0.001	27.7.2020	2020	Breeding	Denmark	Tinning Mose	56.266	9.957	Female	Young	k__Bacteria	p__Firmicutes	c__Bacilli	o__Mycoplasmatales	f__Mycoplasmataceae	g__Mycoplasma	s__Malacoplasma microti
ASV004600	6_vantaa	0.001	2.9.2020	2020	Breeding	Finland	Lansinnatus	60.249	25.118	Male	Young	k__Bacteria	p__Actinobacteriota	c__Actinobacteria	o__Corynebacteriales	f__Mycobacteriaceae	g__Mycobacterium	s__
ASV004600	5_vantaa	0.001	2.9.2020	2020	Breeding	Finland	Lansinnatus	60.249	25.118	Female	Young	k__Bacteria	p__Actinobacteriota	c__Actinobacteria	o__Corynebacteriales	f__Mycobacteriaceae	g__Mycobacterium	s__
ASV004626	VD_01	0.001	27.7.2020	2020	Breeding	Denmark	Tinning Mose	56.266	9.957	Female	Young	k__Bacteria	p__Proteobacteria	c__Gammaproteobacteria	o__Pseudomonadales	f__Pseudomonadaceae	g__Pseudomonas	s__Pseudomonas antarctica
ASV004691	8E13246	0.001	Unknown	2020	NA	Denmark	Tinning Mose	56.266	9.957	Female	Adult	k__Bacteria	p__Proteobacteria	c__Gammaproteobacteria	o__Enterobacterales	f__Enterobacteriaceae	g__Escherichia-Shigella	s__Escherichia marmotae
ASV004728	A810920	0.001	12.8.2020	2020	Breeding	Finland	Hanko	59.8283	22.9659	Male	Young	k__Bacteria	p__Proteobacteria	c__Gammaproteobacteria	o__Enterobacterales	f__Enterobacteriaceae	g__Escherichia-Shigella	s__Escherichia albertii
ASV004750	9_chize	0.001	20.5.2021	2021	Breeding	France	Chize forest	46.1523	0.437	Male	Unknown	k__Bacteria	p__Campylobacterota	c__Campylobacteria	o__Campylobacterales	f__Campylobacteraceae	g__Campylobacter	s__Campylobacter sp. RM16704
ASV004750	A810991	0.001	25.3.2021	2021	Spring	Finland	Hanko	59.8283	22.9659	Male	Adult	k__Bacteria	p__Campylobacterota	c__Campylobacteria	o__Campylobacterales	f__Campylobacteraceae	g__Campylobacter	s__Campylobacter sp. RM16704
ASV004764	A686067	0.001	31.5.2020	2020	Breeding	Finland	Karjaa	60.0715	23.662	Male	Adult	k__Bacteria	p__Bacteroidota	c__Bacteroidia	o__Bacteroidales	f__Bacteroidaceae	g__Bacteroides	s__Bacteroides acidifaciens
ASV004900	LV02	0.001	21.8.2020	2020	Breeding	Latvia	Pape	56.1625	21.0656	Female	Young	k__Bacteria	p__Firmicutes	c__Clostridia	o__Clostridiales	f__Clostridiaceae	g__Clostridium sensu stricto 13	s__
ASV004904	A809582	0.001	9.8.2020	2020	Breeding	Finland	Hanko	59.8283	22.9659	Male	Young	k__Bacteria	p__Proteobacteria	c__Gammaproteobacteria	o__Enterobacterales	f__Enterobacteriaceae	g__Escherichia-Shigella	s__Escherichia marmotae
ASV005023	A811018	0.001	26.3.2021	2021	Spring	Finland	Hanko	59.8283	22.9659	Female	Adult	k__Bacteria	p__Campylobacterota	c__Campylobacteria	o__Campylobacterales	f__Campylobacteraceae	g__Campylobacter	s__Campylobacter jejuni subsp. jejuni LMG 23269
ASV005124	LV24	0.001	20.9.2020	2020	Autumn	Latvia	Pape	56.1625	21.0656	Male	Adult	k__Bacteria	p__Campylobacterota	c__Campylobacteria	o__Campylobacterales	f__Campylobacteraceae	g__Campylobacter	s__Campylobacter sp. RM16704
ASV005124	8A85322	0.001	20.7.2020	2020	Breeding	Denmark	Tinning Mose	56.266	9.957	Female	Adult	k__Bacteria	p__Campylobacterota	c__Campylobacteria	o__Campylobacterales	f__Campylobacteraceae	g__Campylobacter	s__Campylobacter sp. RM16704
ASV005162	9_vantaa	0.001	14.9.2020	2020	Breeding	Finland	Lansinnatus	60.249	25.118	Female	Young	k__Bacteria	p__Proteobacteria	c__Gammaproteobacteria	o__Enterobacterales	f__Enterobacteriaceae	g__Escherichia-Shigella	s__Escherichia albertii
ASV005254	LV29	0.001	23.9.2020	2020	Autumn	Latvia	Pape	56.1625	21.0656	Female	Young	k__Bacteria	p__Proteobacteria	c__Gammaproteobacteria	o__Enterobacterales	f__Enterobacteriaceae	g__Escherichia-Shigella	s__Escherichia marmotae
ASV005266	D26	0.001	20.5.2021	2021	Breeding	France	Chize forest	46.0979	0.4134	Female	Unknown	k__Bacteria	p__Firmicutes	c__Bacilli	o__Mycoplasmatales	f__Mycoplasmataceae	g__Ureaplasma	s__
ASV005290	16_denmark	0.001	22.9.2020	2020	Autumn	Denmark	Bagenkop	54.728	Oct.52	Male	Young	k__Bacteria	p__Proteobacteria	c__Gammaproteobacteria	o__Enterobacterales	f__Enterobacteriaceae	g__Escherichia-Shigella	s__Escherichia marmotae
ASV005517	9_vantaa	0.001	14.9.2020	2020	Breeding	Finland	Lansinnatus	60.249	25.118	Female	Young	k__Bacteria	p__Proteobacteria	c__Gammaproteobacteria	o__Enterobacterales	f__Enterobacteriaceae	g__Escherichia-Shigella	s__Escherichia marmotae
ASV005529	VD_01	0.001	27.7.2020	2020	Breeding	Denmark	Tinning Mose	56.266	9.957	Female	Young	k__Bacteria	p__Firmicutes	c__Bacilli	o__Mycoplasmatales	f__Mycoplasmataceae	g__Mycoplasma	s__Malacoplasma microti
ASV005539	5_vantaa	0.001	2.9.2020	2020	Breeding	Finland	Lansinnatus	60.249	25.118	Female	Young	k__Bacteria	p__Actinobacteriota	c__Actinobacteria	o__Corynebacteriales	f__Mycobacteriaceae	g__Mycobacterium	s__
ASV005606	LV47	0.001	30.9.2020	2020	Autumn	Latvia	Pape	56.1625	21.0656	Female	Young	k__Bacteria	p__Campylobacterota	c__Campylobacteria	o__Campylobacterales	f__Helicobacteraceae	g__Helicobacter	s__Helicobacter anseris
ASV005685	D13	0.001	18.5.2021	2021	Breeding	France	Chize forest	46.1126	0.4495	Male	Unknown	k__Bacteria	p__Firmicutes	c__Bacilli	o__Mycoplasmatales	f__Mycoplasmataceae	g__Ureaplasma	s__
ASV005685	A810988	0.001	24.3.2021	2021	Spring	Finland	Hanko	59.8283	22.9659	Male	Adult	k__Bacteria	p__Firmicutes	c__Bacilli	o__Mycoplasmatales	f__Mycoplasmataceae	g__Ureaplasma	s__
ASV005754	LV30	0.001	25.9.2020	2020	Autumn	Latvia	Pape	56.1625	21.0656	Female	Young	k__Bacteria	p__Proteobacteria	c__Gammaproteobacteria	o__Enterobacterales	f__Enterobacteriaceae	g__Escherichia-Shigella	s__Escherichia marmotae
ASV005808	A810920	0.001	12.8.2020	2020	Breeding	Finland	Hanko	59.8283	22.9659	Male	Young	k__Bacteria	p__Proteobacteria	c__Gammaproteobacteria	o__Enterobacterales	f__Enterobacteriaceae	g__Escherichia-Shigella	s__Escherichia coli
ASV005834	16_denmark	0.001	22.9.2020	2020	Autumn	Denmark	Bagenkop	54.728	Oct.52	Male	Young	k__Bacteria	p__Proteobacteria	c__Gammaproteobacteria	o__Enterobacterales	f__Enterobacteriaceae	g__Escherichia-Shigella	s__Escherichia marmotae
ASV005850	A810920	0.001	12.8.2020	2020	Breeding	Finland	Hanko	59.8283	22.9659	Male	Young	k__Bacteria	p__Proteobacteria	c__Gammaproteobacteria	o__Enterobacterales	f__Enterobacteriaceae	g__Escherichia-Shigella	s__Escherichia coli 55989
ASV005851	A810920	0.001	12.8.2020	2020	Breeding	Finland	Hanko	59.8283	22.9659	Male	Young	k__Bacteria	p__Proteobacteria	c__Gammaproteobacteria	o__Enterobacterales	f__Enterobacteriaceae	g__Escherichia-Shigella	s__Escherichia coli 55989
ASV005962	14_denmark	0.001	20.9.2020	2020	Autumn	Denmark	Hjulby	55.3422	Oct.66	Male	Young	k__Bacteria	p__Firmicutes	c__Clostridia	o__Clostridiales	f__Clostridiaceae	g__Clostridium sensu stricto 1	s__
ASV005986	14_chize	0.001	31.5.2021	2021	Breeding	France	Chize forest	46.1523	0.437	Female	Unknown	k__Bacteria	p__Firmicutes	c__Bacilli	o__Mycoplasmatales	f__Mycoplasmataceae	g__Ureaplasma	s__
ASV006064	LV47	0.001	30.9.2020	2020	Autumn	Latvia	Pape	56.1625	21.0656	Female	Young	k__Bacteria	p__Campylobacterota	c__Campylobacteria	o__Campylobacterales	f__Helicobacteraceae	g__Helicobacter	s__Helicobacter anseris
ASV006065	D13	0.001	18.5.2021	2021	Breeding	France	Chize forest	46.1126	0.4495	Male	Unknown	k__Bacteria	p__Firmicutes	c__Bacilli	o__Staphylococcales	f__Staphylococcaceae	g__Staphylococcus	s__Staphylococcus succinus
ASV006125	8_vantaa	0.001	2.9.2020	2020	Breeding	Finland	Lansinnatus	60.249	25.118	Male	Young	k__Bacteria	p__Proteobacteria	c__Gammaproteobacteria	o__Enterobacterales	f__Aeromonadaceae	g__Aeromonas	s__
ASV006159	16_denmark	0.001	22.9.2020	2020	Autumn	Denmark	Bagenkop	54.728	Oct.52	Male	Young	k__Bacteria	p__Proteobacteria	c__Gammaproteobacteria	o__Enterobacterales	f__Enterobacteriaceae	g__Escherichia-Shigella	s__Escherichia coli
ASV006215	14_vantaa	0.001	1.10.2020	2020	Autumn	Finland	Lansinnatus	60.249	25.118	Male	Adult	k__Bacteria	p__Campylobacterota	c__Campylobacteria	o__Campylobacterales	f__Campylobacteraceae	g__Campylobacter	s__Campylobacter jejuni subsp. jejuni LMG 23211
ASV006231	5_vantaa	0.001	2.9.2020	2020	Breeding	Finland	Lansinnatus	60.249	25.118	Female	Young	k__Bacteria	p__Actinobacteriota	c__Actinobacteria	o__Corynebacteriales	f__Mycobacteriaceae	g__Mycobacterium	s__
ASV006310	16_denmark	0.001	22.9.2020	2020	Autumn	Denmark	Bagenkop	54.728	Oct.52	Male	Young	k__Bacteria	p__Proteobacteria	c__Gammaproteobacteria	o__Enterobacterales	f__Enterobacteriaceae	g__Escherichia-Shigella	s__Escherichia albertii
ASV006458	9_vantaa	0.001	14.9.2020	2020	Breeding	Finland	Lansinnatus	60.249	25.118	Female	Young	k__Bacteria	p__Proteobacteria	c__Gammaproteobacteria	o__Enterobacterales	f__Enterobacteriaceae	g__Escherichia-Shigella	s__Escherichia coli
ASV006484	LV29	0.001	23.9.2020	2020	Autumn	Latvia	Pape	56.1625	21.0656	Female	Young	k__Bacteria	p__Proteobacteria	c__Gammaproteobacteria	o__Enterobacterales	f__Enterobacteriaceae	g__Escherichia-Shigella	s__Escherichia marmotae
ASV006499	14_denmark	0.001	20.9.2020	2020	Autumn	Denmark	Hjulby	55.3422	Oct.66	Male	Young	k__Bacteria	p__Firmicutes	c__Bacilli	o__Bacillales	f__Bacillaceae	g__Bacillus	s__Bacillus drentensis
ASV006528	A686067	0.001	31.5.2020	2020	Breeding	Finland	Karjaa	60.0715	23.662	Male	Adult	k__Bacteria	p__Firmicutes	c__Clostridia	o__Clostridiales	f__Clostridiaceae	g__Clostridium sensu stricto 1	s__Clostridium perfringens
ASV006590	8A85329	0.001	5.8.2020	2020	Breeding	Denmark	Tinning Mose	56.266	9.957	Male	Young	k__Bacteria	p__Actinobacteriota	c__Actinobacteria	o__Corynebacteriales	f__Corynebacteriaceae	g__Corynebacterium	s__
ASV006597	8_vantaa	0.001	2.9.2020	2020	Breeding	Finland	Lansinnatus	60.249	25.118	Male	Young	k__Bacteria	p__Proteobacteria	c__Gammaproteobacteria	o__Enterobacterales	f__Enterobacteriaceae	g__Enterobacter	s__
ASV006611	5_vantaa	0.001	2.9.2020	2020	Breeding	Finland	Lansinnatus	60.249	25.118	Female	Young	k__Bacteria	p__Actinobacteriota	c__Actinobacteria	o__Corynebacteriales	f__Mycobacteriaceae	g__Mycobacterium	s__
ASV006647	A686080	0.001	23.9.2020	2020	Autumn	Finland	Karjaa	60.0715	23.662	Male	Young	k__Bacteria	p__Campylobacterota	c__Campylobacteria	o__Campylobacterales	f__Campylobacteraceae	g__Campylobacter	s__Campylobacter jejuni subsp. jejuni LMG 23211
ASV006698	LV30	0.001	25.9.2020	2020	Autumn	Latvia	Pape	56.1625	21.0656	Female	Young	k__Bacteria	p__Campylobacterota	c__Campylobacteria	o__Campylobacterales	f__Campylobacteraceae	g__Campylobacter	s__Campylobacter jejuni subsp. jejuni LMG 23211
ASV006859	14_denmark	0.001	20.9.2020	2020	Autumn	Denmark	Hjulby	55.3422	Oct.66	Male	Young	k__Bacteria	p__Firmicutes	c__Clostridia	o__Clostridiales	f__Clostridiaceae	g__Clostridium sensu stricto 1	s__
ASV006873	A686083	0.001	25.9.2020	2020	Autumn	Finland	Karjaa	60.0715	23.662	Male	Young	k__Bacteria	p__Proteobacteria	c__Gammaproteobacteria	o__Enterobacterales	f__Yersiniaceae	g__Serratia	s__
ASV006893	A810988	0.001	24.3.2021	2021	Spring	Finland	Hanko	59.8283	22.9659	Male	Adult	k__Bacteria	p__Firmicutes	c__Bacilli	o__Mycoplasmatales	f__Mycoplasmataceae	g__Ureaplasma	s__
ASV006909	9_vantaa	0.001	14.9.2020	2020	Breeding	Finland	Lansinnatus	60.249	25.118	Female	Young	k__Bacteria	p__Proteobacteria	c__Gammaproteobacteria	o__Enterobacterales	f__Enterobacteriaceae	g__Escherichia-Shigella	s__Escherichia albertii
ASV006947	A686083	0.001	25.9.2020	2020	Autumn	Finland	Karjaa	60.0715	23.662	Male	Young	k__Bacteria	p__Campylobacterota	c__Campylobacteria	o__Campylobacterales	f__Helicobacteraceae	g__Helicobacter	s__Helicobacter sp. 'B52D Seymour'
ASV006948	8A85322	0.001	20.7.2020	2020	Breeding	Denmark	Tinning Mose	56.266	9.957	Female	Adult	k__Bacteria	p__Campylobacterota	c__Campylobacteria	o__Campylobacterales	f__Campylobacteraceae	g__Campylobacter	s__Campylobacter jejuni subsp. jejuni LMG 23211
ASV006948	15_denmark	0.001	20.9.2020	2020	Autumn	Denmark	Hjulby	55.3422	Oct.66	Male	Young	k__Bacteria	p__Campylobacterota	c__Campylobacteria	o__Campylobacterales	f__Campylobacteraceae	g__Campylobacter	s__Campylobacter jejuni subsp. jejuni LMG 23211
ASV006984	14_denmark	0.001	20.9.2020	2020	Autumn	Denmark	Hjulby	55.3422	Oct.66	Male	Young	k__Bacteria	p__Firmicutes	c__Bacilli	o__Bacillales	f__Bacillaceae	g__Bacillus	s__
ASV007062	5_vantaa	0.001	2.9.2020	2020	Breeding	Finland	Lansinnatus	60.249	25.118	Female	Young	k__Bacteria	p__Actinobacteriota	c__Actinobacteria	o__Corynebacteriales	f__Nocardiaceae	g__Nocardia	s__Nocardia salmonicida subsp. cummidelens
ASV007092	LV47	0.001	30.9.2020	2020	Autumn	Latvia	Pape	56.1625	21.0656	Female	Young	k__Bacteria	p__Campylobacterota	c__Campylobacteria	o__Campylobacterales	f__Helicobacteraceae	g__Helicobacter	s__Helicobacter anseris
ASV007135	LV24	0.001	20.9.2020	2020	Autumn	Latvia	Pape	56.1625	21.0656	Male	Adult	k__Bacteria	p__Campylobacterota	c__Campylobacteria	o__Campylobacterales	f__Campylobacteraceae	g__Campylobacter	s__Campylobacter jejuni subsp. jejuni LMG 23211
ASV007138	A810920	0.001	12.8.2020	2020	Breeding	Finland	Hanko	59.8283	22.9659	Male	Young	k__Bacteria	p__Firmicutes	c__Bacilli	o__Mycoplasmatales	f__Mycoplasmataceae	g__Mycoplasma	s__Mycoplasma penetrans HF-2
ASV007146	12_denmark	0.001	16.8.2020	2020	Breeding	Denmark	Bagenkop	54.728	Oct.52	Unknown	Young	k__Bacteria	p__Proteobacteria	c__Gammaproteobacteria	o__Pseudomonadales	f__Moraxellaceae	g__Acinetobacter	s__Acinetobacter johnsonii XBB1
ASV007164	A686083	0.001	25.9.2020	2020	Autumn	Finland	Karjaa	60.0715	23.662	Male	Young	k__Bacteria	p__Actinobacteriota	c__Actinobacteria	o__Corynebacteriales	f__Corynebacteriaceae	g__Corynebacterium	s__
ASV007227	A810992	0.001	25.3.2021	2021	Spring	Finland	Hanko	59.8283	22.9659	Female	Adult	k__Bacteria	p__Proteobacteria	c__Gammaproteobacteria	o__Enterobacterales	f__Enterobacteriaceae	g__Klebsiella	s__Klebsiella michiganensis
ASV007278	9_vantaa	0.001	14.9.2020	2020	Breeding	Finland	Lansinnatus	60.249	25.118	Female	Young	k__Bacteria	p__Proteobacteria	c__Gammaproteobacteria	o__Enterobacterales	f__Enterobacteriaceae	g__Escherichia-Shigella	s__Escherichia coli ED1a
ASV007295	A810989	0.001	24.3.2021	2021	Spring	Finland	Hanko	59.8283	22.9659	Male	Adult	k__Bacteria	p__Campylobacterota	c__Campylobacteria	o__Campylobacterales	f__Campylobacteraceae	g__Campylobacter	s__Campylobacter sp. RM16704
ASV007295	14_chize	0.001	31.5.2021	2021	Breeding	France	Chize forest	46.1523	0.437	Female	Unknown	k__Bacteria	p__Campylobacterota	c__Campylobacteria	o__Campylobacterales	f__Campylobacteraceae	g__Campylobacter	s__Campylobacter sp. RM16704
ASV007357	5_vantaa	0.001	2.9.2020	2020	Breeding	Finland	Lansinnatus	60.249	25.118	Female	Young	k__Bacteria	p__Actinobacteriota	c__Actinobacteria	o__Corynebacteriales	f__Mycobacteriaceae	g__Mycobacterium	s__
ASV007419	6_denmark	0.001	21.7.2020	2020	Breeding	Denmark	Svendborg	55.0557	Oct.31	Unknown	Young	k__Bacteria	p__Bacteroidota	c__Bacteroidia	o__Bacteroidales	f__Prevotellaceae	g__Prevotella	s__Prevotella bivia
ASV007432	LV24	0.001	20.9.2020	2020	Autumn	Latvia	Pape	56.1625	21.0656	Male	Adult	k__Bacteria	p__Campylobacterota	c__Campylobacteria	o__Campylobacterales	f__Campylobacteraceae	g__Campylobacter	s__Campylobacter sp. RM16704
ASV007450	LV29	0.001	23.9.2020	2020	Autumn	Latvia	Pape	56.1625	21.0656	Female	Young	k__Bacteria	p__Proteobacteria	c__Gammaproteobacteria	o__Enterobacterales	f__Enterobacteriaceae	g__Escherichia-Shigella	s__Escherichia marmotae
ASV007459	16_denmark	0.001	22.9.2020	2020	Autumn	Denmark	Bagenkop	54.728	Oct.52	Male	Young	k__Bacteria	p__Proteobacteria	c__Gammaproteobacteria	o__Enterobacterales	f__Enterobacteriaceae	g__Escherichia-Shigella	s__Escherichia marmotae
ASV007523	14_chize	0.001	31.5.2021	2021	Breeding	France	Chize forest	46.1523	0.437	Female	Unknown	k__Bacteria	p__Actinobacteriota	c__Actinobacteria	o__Corynebacteriales	f__Mycobacteriaceae	g__Mycobacterium	s__
ASV007531	A810987	0.001	24.3.2021	2021	Spring	Finland	Hanko	59.8283	22.9659	Male	Adult	k__Bacteria	p__Actinobacteriota	c__Actinobacteria	o__Corynebacteriales	f__Mycobacteriaceae	g__Mycobacterium	s__
ASV007546	A810920	0.001	12.8.2020	2020	Breeding	Finland	Hanko	59.8283	22.9659	Male	Young	k__Bacteria	p__Proteobacteria	c__Gammaproteobacteria	o__Enterobacterales	f__Enterobacteriaceae	g__Escherichia-Shigella	s__Escherichia coli
ASV007628	11_vantaa	0.001	14.9.2020	2020	Breeding	Finland	Lansinnatus	60.249	25.118	Male	Adult	k__Bacteria	p__Actinobacteriota	c__Actinobacteria	o__Corynebacteriales	f__Mycobacteriaceae	g__Mycobacterium	s__
ASV007700	A810920	0.001	12.8.2020	2020	Breeding	Finland	Hanko	59.8283	22.9659	Male	Young	k__Bacteria	p__Firmicutes	c__Bacilli	o__Mycoplasmatales	f__Mycoplasmataceae	g__Mycoplasma	s__Mycoplasma penetrans HF-2
ASV007723	A810986	0.001	24.3.2021	2021	Spring	Finland	Hanko	59.8283	22.9659	Female	Adult	k__Bacteria	p__Proteobacteria	c__Gammaproteobacteria	o__Enterobacterales	f__Enterobacteriaceae	g__Escherichia-Shigella	s__Escherichia marmotae
ASV007733	A810920	0.001	12.8.2020	2020	Breeding	Finland	Hanko	59.8283	22.9659	Male	Young	k__Bacteria	p__Proteobacteria	c__Gammaproteobacteria	o__Enterobacterales	f__Enterobacteriaceae	g__Escherichia-Shigella	s__Escherichia coli
ASV007734	11_vantaa	0.001	14.9.2020	2020	Breeding	Finland	Lansinnatus	60.249	25.118	Male	Adult	k__Bacteria	p__Proteobacteria	c__Gammaproteobacteria	o__Burkholderiales	f__Burkholderiaceae	g__Burkholderia-Caballeronia-Paraburkholderia	s__Burkholderia sp. ASS7
ASV007763	VD_01	0.001	27.7.2020	2020	Breeding	Denmark	Tinning Mose	56.266	9.957	Female	Young	k__Bacteria	p__Proteobacteria	c__Gammaproteobacteria	o__Enterobacterales	f__Yersiniaceae	g__Serratia	s__Serratia sp. P2ACOL2
ASV007764	8A85322	0.001	20.7.2020	2020	Breeding	Denmark	Tinning Mose	56.266	9.957	Female	Adult	k__Bacteria	p__Campylobacterota	c__Campylobacteria	o__Campylobacterales	f__Campylobacteraceae	g__Campylobacter	s__Campylobacter sp. RM16704
ASV007800	A810920	0.001	12.8.2020	2020	Breeding	Finland	Hanko	59.8283	22.9659	Male	Young	k__Bacteria	p__Proteobacteria	c__Gammaproteobacteria	o__Enterobacterales	f__Enterobacteriaceae	g__Escherichia-Shigella	s__Escherichia coli IAI1
ASV007854	A810920	0.001	12.8.2020	2020	Breeding	Finland	Hanko	59.8283	22.9659	Male	Young	k__Bacteria	p__Proteobacteria	c__Gammaproteobacteria	o__Enterobacterales	f__Enterobacteriaceae	g__Escherichia-Shigella	s__Escherichia coli
ASV007874	LV02	0.001	21.8.2020	2020	Breeding	Latvia	Pape	56.1625	21.0656	Female	Young	k__Bacteria	p__Proteobacteria	c__Gammaproteobacteria	o__Enterobacterales	f__Yersiniaceae	g__Yersinia	s__Yersinia kristensenii ATCC 33638
ASV007919	A809585	0.001	11.8.2020	2020	Breeding	Finland	Hanko	59.8283	22.9659	Male	Young	k__Bacteria	p__Campylobacterota	c__Campylobacteria	o__Campylobacterales	f__Helicobacteraceae	g__Helicobacter	s__Helicobacter sp. 'B52D Seymour'
ASV007919	A686083	0.001	25.9.2020	2020	Autumn	Finland	Karjaa	60.0715	23.662	Male	Young	k__Bacteria	p__Campylobacterota	c__Campylobacteria	o__Campylobacterales	f__Helicobacteraceae	g__Helicobacter	s__Helicobacter sp. 'B52D Seymour'
ASV007931	D15	0.001	18.5.2021	2021	Breeding	France	Chize forest	46.1319	0.4387	Male	Unknown	k__Bacteria	p__Firmicutes	c__Clostridia	o__Clostridiales	f__Clostridiaceae	g__Clostridium sensu stricto 1	s__Clostridium sp. Marseille-P2414
ASV008000	9_vantaa	0.001	14.9.2020	2020	Breeding	Finland	Lansinnatus	60.249	25.118	Female	Young	k__Bacteria	p__Proteobacteria	c__Gammaproteobacteria	o__Enterobacterales	f__Enterobacteriaceae	g__Escherichia-Shigella	s__Escherichia coli
ASV008040	LV13	0.001	19.9.2020	2020	Autumn	Latvia	Pape	56.1625	21.0656	Female	Adult	k__Bacteria	p__Firmicutes	c__Clostridia	o__Clostridiales	f__Clostridiaceae	g__Clostridium sensu stricto 1	s__Clostridium sp. mbf_VZ 132
ASV008069	7_denmark	0.001	21.7.2020	2020	Breeding	Denmark	Svendborg	55.0557	Oct.31	Female	Adult	k__Bacteria	p__Firmicutes	c__Bacilli	o__Staphylococcales	f__Staphylococcaceae	g__Staphylococcus	s__Staphylococcus agnetis
ASV008092	LV13	0.001	19.9.2020	2020	Autumn	Latvia	Pape	56.1625	21.0656	Female	Adult	k__Bacteria	p__Firmicutes	c__Bacilli	o__Bacillales	f__Bacillaceae	g__Bacillus	s__Bacillus longiquaesitum
ASV008176	A810920	0.001	12.8.2020	2020	Breeding	Finland	Hanko	59.8283	22.9659	Male	Young	k__Bacteria	p__Proteobacteria	c__Gammaproteobacteria	o__Enterobacterales	f__Enterobacteriaceae	g__Escherichia-Shigella	s__Escherichia coli 55989
ASV008217	D27	0.001	27.5.2021	2021	Breeding	France	Chize forest	46.0951	0.4133	Female	Unknown	k__Bacteria	p__Firmicutes	c__Bacilli	o__Mycoplasmatales	f__Mycoplasmataceae	g__Mycoplasma	s__Mycoplasma penetrans HF-2
ASV008234	8_vantaa	0.001	2.9.2020	2020	Breeding	Finland	Lansinnatus	60.249	25.118	Male	Young	k__Bacteria	p__Proteobacteria	c__Gammaproteobacteria	o__Enterobacterales	f__Enterobacteriaceae	g__Escherichia-Shigella	s__Escherichia marmotae
ASV008253	A810986	0.001	24.3.2021	2021	Spring	Finland	Hanko	59.8283	22.9659	Female	Adult	k__Bacteria	p__Proteobacteria	c__Gammaproteobacteria	o__Enterobacterales	f__Enterobacteriaceae	g__Escherichia-Shigella	s__Escherichia marmotae
ASV008297	A810983	0.001	23.3.2021	2021	Spring	Finland	Hanko	59.8283	22.9659	Male	Adult	k__Bacteria	p__Campylobacterota	c__Campylobacteria	o__Campylobacterales	f__Campylobacteraceae	g__Campylobacter	s__Campylobacter jejuni
ASV008322	9_vantaa	0.001	14.9.2020	2020	Breeding	Finland	Lansinnatus	60.249	25.118	Female	Young	k__Bacteria	p__Proteobacteria	c__Gammaproteobacteria	o__Enterobacterales	f__Enterobacteriaceae	g__Escherichia-Shigella	s__Escherichia marmotae
ASV008363	2_vantaa	0.001	2.9.2020	2020	Breeding	Finland	Lansinnatus	60.249	25.118	Male	Young	k__Bacteria	p__Actinobacteriota	c__Actinobacteria	o__Corynebacteriales	f__Mycobacteriaceae	g__Mycobacterium	s__
ASV008363	11_vantaa	0.001	14.9.2020	2020	Breeding	Finland	Lansinnatus	60.249	25.118	Male	Adult	k__Bacteria	p__Actinobacteriota	c__Actinobacteria	o__Corynebacteriales	f__Mycobacteriaceae	g__Mycobacterium	s__
ASV008403	1_denmark	0.001	11.7.2020	2020	Breeding	Denmark	Svendborg	55.0557	Oct.31	Male	Adult	k__Bacteria	p__Firmicutes	c__Bacilli	o__Mycoplasmatales	f__Mycoplasmataceae	g__Mycoplasma	s__Mycoplasma penetrans HF-2
ASV008403	LV32	0.001	27.9.2020	2020	Autumn	Latvia	Pape	56.1625	21.0656	Female	Young	k__Bacteria	p__Firmicutes	c__Bacilli	o__Mycoplasmatales	f__Mycoplasmataceae	g__Mycoplasma	s__Mycoplasma penetrans HF-2
ASV008403	A686067	0.001	31.5.2020	2020	Breeding	Finland	Karjaa	60.0715	23.662	Male	Adult	k__Bacteria	p__Firmicutes	c__Bacilli	o__Mycoplasmatales	f__Mycoplasmataceae	g__Mycoplasma	s__Mycoplasma penetrans HF-2
ASV008425	9_vantaa	0.001	14.9.2020	2020	Breeding	Finland	Lansinnatus	60.249	25.118	Female	Young	k__Bacteria	p__Proteobacteria	c__Gammaproteobacteria	o__Enterobacterales	f__Enterobacteriaceae	g__Escherichia-Shigella	s__Escherichia albertii
ASV008450	5_vantaa	0.001	2.9.2020	2020	Breeding	Finland	Lansinnatus	60.249	25.118	Female	Young	k__Bacteria	p__Actinobacteriota	c__Actinobacteria	o__Corynebacteriales	f__Mycobacteriaceae	g__Mycobacterium	s__
ASV008520	D27	0.001	27.5.2021	2021	Breeding	France	Chize forest	46.0951	0.4133	Female	Unknown	k__Bacteria	p__Firmicutes	c__Clostridia	o__Clostridiales	f__Clostridiaceae	g__Clostridium sensu stricto 1	s__Clostridium sp. Marseille-P2414
ASV008650	D27	0.001	27.5.2021	2021	Breeding	France	Chize forest	46.0951	0.4133	Female	Unknown	k__Bacteria	p__Firmicutes	c__Clostridia	o__Clostridiales	f__Clostridiaceae	g__Clostridium sensu stricto 1	s__Clostridium sp. Marseille-P2414
ASV008652	D26	0.001	20.5.2021	2021	Breeding	France	Chize forest	46.0979	0.4134	Female	Unknown	k__Bacteria	p__Firmicutes	c__Clostridia	o__Clostridiales	f__Clostridiaceae	g__Clostridium sensu stricto 1	s__Clostridium sp. Marseille-P2414
ASV008694	16_denmark	0.001	22.9.2020	2020	Autumn	Denmark	Bagenkop	54.728	Oct.52	Male	Young	k__Bacteria	p__Proteobacteria	c__Gammaproteobacteria	o__Enterobacterales	f__Enterobacteriaceae	g__Escherichia-Shigella	s__Escherichia marmotae
ASV008697	A810987	0.001	24.3.2021	2021	Spring	Finland	Hanko	59.8283	22.9659	Male	Adult	k__Bacteria	p__Firmicutes	c__Bacilli	o__Staphylococcales	f__Staphylococcaceae	g__Staphylococcus	s__Staphylococcus hominis
ASV008751	A686081	0.001	24.9.2020	2020	Autumn	Finland	Karjaa	60.0715	23.662	Male	Young	k__Bacteria	p__Proteobacteria	c__Gammaproteobacteria	o__Enterobacterales	f__Enterobacteriaceae	g__Enterobacter	s__Lelliottia amnigena
ASV008751	6_denmark	0.001	21.7.2020	2020	Breeding	Denmark	Svendborg	55.0557	Oct.31	Unknown	Young	k__Bacteria	p__Proteobacteria	c__Gammaproteobacteria	o__Enterobacterales	f__Enterobacteriaceae	g__Enterobacter	s__Lelliottia amnigena
ASV008781	LV18	0.001	19.9.2020	2020	Autumn	Latvia	Pape	56.1625	21.0656	Female	Adult	k__Bacteria	p__Proteobacteria	c__Gammaproteobacteria	o__Enterobacterales	f__Enterobacteriaceae	g__Escherichia-Shigella	s__Escherichia marmotae
ASV008801	8E13246	0.001	Unknown	2020	NA	Denmark	Tinning Mose	56.266	9.957	Female	Adult	k__Bacteria	p__Proteobacteria	c__Gammaproteobacteria	o__Enterobacterales	f__Enterobacteriaceae	g__Escherichia-Shigella	s__Escherichia marmotae
ASV008829	16_denmark	0.001	22.9.2020	2020	Autumn	Denmark	Bagenkop	54.728	Oct.52	Male	Young	k__Bacteria	p__Proteobacteria	c__Gammaproteobacteria	o__Enterobacterales	f__Enterobacteriaceae	g__Escherichia-Shigella	s__Escherichia albertii
ASV008830	A686083	0.001	25.9.2020	2020	Autumn	Finland	Karjaa	60.0715	23.662	Male	Young	k__Bacteria	p__Firmicutes	c__Bacilli	o__Bacillales	f__Bacillaceae	g__Bacillus	s__Bacillus longiquaesitum
ASV008860	16_denmark	0.001	22.9.2020	2020	Autumn	Denmark	Bagenkop	54.728	Oct.52	Male	Young	k__Bacteria	p__Firmicutes	c__Bacilli	o__Lactobacillales	f__Enterococcaceae	g__Enterococcus	s__Enterococcus casseliflavus
ASV008935	A811018	0.001	26.3.2021	2021	Spring	Finland	Hanko	59.8283	22.9659	Female	Adult	k__Bacteria	p__Proteobacteria	c__Gammaproteobacteria	o__Enterobacterales	f__Enterobacteriaceae	g__Escherichia-Shigella	s__Escherichia fergusonii ATCC 35469
ASV008950	LV13	0.001	19.9.2020	2020	Autumn	Latvia	Pape	56.1625	21.0656	Female	Adult	k__Bacteria	p__Actinobacteriota	c__Actinobacteria	o__Corynebacteriales	f__Mycobacteriaceae	g__Mycobacterium	s__
ASV008998	LV13	0.001	19.9.2020	2020	Autumn	Latvia	Pape	56.1625	21.0656	Female	Adult	k__Bacteria	p__Actinobacteriota	c__Actinobacteria	o__Corynebacteriales	f__Mycobacteriaceae	g__Mycobacterium	s__
ASV009029	LV13	0.001	19.9.2020	2020	Autumn	Latvia	Pape	56.1625	21.0656	Female	Adult	k__Bacteria	p__Proteobacteria	c__Gammaproteobacteria	o__Pseudomonadales	f__Pseudomonadaceae	g__Pseudomonas	s__Pseudomonas segetis
ASV009035	A810986	0.001	24.3.2021	2021	Spring	Finland	Hanko	59.8283	22.9659	Female	Adult	k__Bacteria	p__Proteobacteria	c__Gammaproteobacteria	o__Enterobacterales	f__Enterobacteriaceae	g__Escherichia-Shigella	s__Escherichia marmotae
ASV009198	15_denmark	0.001	20.9.2020	2020	Autumn	Denmark	Hjulby	55.3422	Oct.66	Male	Young	k__Bacteria	p__Proteobacteria	c__Gammaproteobacteria	o__Pseudomonadales	f__Pseudomonadaceae	g__Pseudomonas	s__Pseudomonas antarctica
ASV009208	A686081	0.001	24.9.2020	2020	Autumn	Finland	Karjaa	60.0715	23.662	Male	Young	k__Bacteria	p__Campylobacterota	c__Campylobacteria	o__Campylobacterales	f__Campylobacteraceae	g__Campylobacter	s__Campylobacter jejuni subsp. jejuni LMG 23211
ASV009237	16_denmark	0.001	22.9.2020	2020	Autumn	Denmark	Bagenkop	54.728	Oct.52	Male	Young	k__Bacteria	p__Proteobacteria	c__Gammaproteobacteria	o__Enterobacterales	f__Enterobacteriaceae	g__Escherichia-Shigella	s__Escherichia marmotae
ASV009305	16_denmark	0.001	22.9.2020	2020	Autumn	Denmark	Bagenkop	54.728	Oct.52	Male	Young	k__Bacteria	p__Proteobacteria	c__Gammaproteobacteria	o__Enterobacterales	f__Enterobacteriaceae	g__Escherichia-Shigella	s__Escherichia marmotae
ASV009336	1_denmark	0.001	11.7.2020	2020	Breeding	Denmark	Svendborg	55.0557	Oct.31	Male	Adult	k__Bacteria	p__Proteobacteria	c__Gammaproteobacteria	o__Enterobacterales	f__Enterobacteriaceae	g__Escherichia-Shigella	s__Escherichia marmotae
ASV009375	LV29	0.001	23.9.2020	2020	Autumn	Latvia	Pape	56.1625	21.0656	Female	Young	k__Bacteria	p__Proteobacteria	c__Gammaproteobacteria	o__Enterobacterales	f__Enterobacteriaceae	g__Escherichia-Shigella	s__Escherichia marmotae
ASV009417	A810920	0.001	12.8.2020	2020	Breeding	Finland	Hanko	59.8283	22.9659	Male	Young	k__Bacteria	p__Proteobacteria	c__Gammaproteobacteria	o__Enterobacterales	f__Enterobacteriaceae	g__Escherichia-Shigella	s__Escherichia coli 55989
ASV009431	LV32	0.001	27.9.2020	2020	Autumn	Latvia	Pape	56.1625	21.0656	Female	Young	k__Bacteria	p__Firmicutes	c__Bacilli	o__Bacillales	f__Bacillaceae	g__Bacillus	s__
ASV009434	A810984	0.001	23.3.2021	2021	Spring	Finland	Hanko	59.8283	22.9659	Female	Adult	k__Bacteria	p__Campylobacterota	c__Campylobacteria	o__Campylobacterales	f__Campylobacteraceae	g__Campylobacter	s__Campylobacter sp. RM16704
ASV009455	A686080	0.001	23.9.2020	2020	Autumn	Finland	Karjaa	60.0715	23.662	Male	Young	k__Bacteria	p__Campylobacterota	c__Campylobacteria	o__Campylobacterales	f__Campylobacteraceae	g__Campylobacter	s__Campylobacter jejuni subsp. jejuni LMG 23211
ASV009480	LV29	0.001	23.9.2020	2020	Autumn	Latvia	Pape	56.1625	21.0656	Female	Young	k__Bacteria	p__Proteobacteria	c__Gammaproteobacteria	o__Enterobacterales	f__Enterobacteriaceae	g__Escherichia-Shigella	s__Escherichia marmotae
ASV009480	1_denmark	0.001	11.7.2020	2020	Breeding	Denmark	Svendborg	55.0557	Oct.31	Male	Adult	k__Bacteria	p__Proteobacteria	c__Gammaproteobacteria	o__Enterobacterales	f__Enterobacteriaceae	g__Escherichia-Shigella	s__Escherichia marmotae
ASV009512	A686067	0.001	31.5.2020	2020	Breeding	Finland	Karjaa	60.0715	23.662	Male	Adult	k__Bacteria	p__Campylobacterota	c__Campylobacteria	o__Campylobacterales	f__Campylobacteraceae	g__Campylobacter	s__Campylobacter sp. RM16704
ASV009606	A686067	0.001	31.5.2020	2020	Breeding	Finland	Karjaa	60.0715	23.662	Male	Adult	k__Bacteria	p__Actinobacteriota	c__Actinobacteria	o__Corynebacteriales	f__Mycobacteriaceae	g__Mycobacterium	s__
ASV009621	9_vantaa	0.001	14.9.2020	2020	Breeding	Finland	Lansinnatus	60.249	25.118	Female	Young	k__Bacteria	p__Proteobacteria	c__Gammaproteobacteria	o__Enterobacterales	f__Enterobacteriaceae	g__Escherichia-Shigella	s__Escherichia albertii
ASV009646	7_vantaa	0.001	2.9.2020	2020	Breeding	Finland	Lansinnatus	60.249	25.118	Male	Young	k__Bacteria	p__Actinobacteriota	c__Actinobacteria	o__Corynebacteriales	f__Mycobacteriaceae	g__Mycobacterium	s__
ASV009676	8E13246	0.001	Unknown	2020	NA	Denmark	Tinning Mose	56.266	9.957	Female	Adult	k__Bacteria	p__Proteobacteria	c__Gammaproteobacteria	o__Enterobacterales	f__Enterobacteriaceae	g__Escherichia-Shigella	s__Escherichia marmotae
ASV009784	9_vantaa	0.001	14.9.2020	2020	Breeding	Finland	Lansinnatus	60.249	25.118	Female	Young	k__Bacteria	p__Proteobacteria	c__Gammaproteobacteria	o__Enterobacterales	f__Enterobacteriaceae	g__Escherichia-Shigella	s__Escherichia coli
ASV010128	6_vantaa	0.001	2.9.2020	2020	Breeding	Finland	Lansinnatus	60.249	25.118	Male	Young	k__Bacteria	p__Proteobacteria	c__Gammaproteobacteria	o__Enterobacterales	f__Yersiniaceae	g__Serratia	s__Rahnella sp. 'CDC 21234'
ASV010139	11_vantaa	0.001	14.9.2020	2020	Breeding	Finland	Lansinnatus	60.249	25.118	Male	Adult	k__Bacteria	p__Proteobacteria	c__Gammaproteobacteria	o__Enterobacterales	f__Aeromonadaceae	g__Aeromonas	s__Aeromonas sp. CU5
ASV010150	LV29	0.001	23.9.2020	2020	Autumn	Latvia	Pape	56.1625	21.0656	Female	Young	k__Bacteria	p__Proteobacteria	c__Gammaproteobacteria	o__Enterobacterales	f__Enterobacteriaceae	g__Escherichia-Shigella	s__Escherichia marmotae
ASV010151	A686083	0.001	25.9.2020	2020	Autumn	Finland	Karjaa	60.0715	23.662	Male	Young	k__Bacteria	p__Campylobacterota	c__Campylobacteria	o__Campylobacterales	f__Helicobacteraceae	g__Helicobacter	s__Helicobacter sp. 'B52D Seymour'
ASV010318	14_denmark	0.001	20.9.2020	2020	Autumn	Denmark	Hjulby	55.3422	Oct.66	Male	Young	k__Bacteria	p__Firmicutes	c__Clostridia	o__Clostridiales	f__Clostridiaceae	g__Clostridium sensu stricto 1	s__
ASV010321	A686081	0.001	24.9.2020	2020	Autumn	Finland	Karjaa	60.0715	23.662	Male	Young	k__Bacteria	p__Campylobacterota	c__Campylobacteria	o__Campylobacterales	f__Campylobacteraceae	g__Campylobacter	s__Campylobacter jejuni subsp. jejuni LMG 23211
ASV010342	A810982	0.001	22.3.2021	2021	Spring	Finland	Hanko	59.8283	22.9659	Male	Adult	k__Bacteria	p__Proteobacteria	c__Gammaproteobacteria	o__Enterobacterales	f__Enterobacteriaceae	g__Escherichia-Shigella	s__Escherichia marmotae
ASV010359	8E13246	0.001	Unknown	2020	NA	Denmark	Tinning Mose	56.266	9.957	Female	Adult	k__Bacteria	p__Proteobacteria	c__Gammaproteobacteria	o__Enterobacterales	f__Enterobacteriaceae	g__Escherichia-Shigella	s__Escherichia marmotae
ASV010418	A810986	0.001	24.3.2021	2021	Spring	Finland	Hanko	59.8283	22.9659	Female	Adult	k__Bacteria	p__Proteobacteria	c__Gammaproteobacteria	o__Enterobacterales	f__Enterobacteriaceae	g__Escherichia-Shigella	s__Escherichia marmotae
ASV010448	9_vantaa	0.001	14.9.2020	2020	Breeding	Finland	Lansinnatus	60.249	25.118	Female	Young	k__Bacteria	p__Proteobacteria	c__Gammaproteobacteria	o__Enterobacterales	f__Enterobacteriaceae	g__Escherichia-Shigella	s__Escherichia coli 55989
ASV010493	D27	0.001	27.5.2021	2021	Breeding	France	Chize forest	46.0951	0.4133	Female	Unknown	k__Bacteria	p__Firmicutes	c__Clostridia	o__Clostridiales	f__Clostridiaceae	g__Clostridium sensu stricto 1	s__Clostridium sp. Marseille-P2414
ASV010550	1_denmark	0.001	11.7.2020	2020	Breeding	Denmark	Svendborg	55.0557	Oct.31	Male	Adult	k__Bacteria	p__Firmicutes	c__Bacilli	o__Bacillales	f__Bacillaceae	g__Bacillus	s__Bacillus longiquaesitum
ASV010624	LV31	0.001	26.9.2020	2020	Autumn	Latvia	Pape	56.1625	21.0656	Male	Young	k__Bacteria	p__Proteobacteria	c__Gammaproteobacteria	o__Enterobacterales	f__Enterobacteriaceae	g__Escherichia-Shigella	s__Escherichia albertii
ASV010648	A811018	0.001	26.3.2021	2021	Spring	Finland	Hanko	59.8283	22.9659	Female	Adult	k__Bacteria	p__Proteobacteria	c__Gammaproteobacteria	o__Enterobacterales	f__Enterobacteriaceae	g__Escherichia-Shigella	s__Escherichia albertii
ASV010656	A810987	0.001	24.3.2021	2021	Spring	Finland	Hanko	59.8283	22.9659	Male	Adult	k__Bacteria	p__Firmicutes	c__Clostridia	o__Clostridiales	f__Clostridiaceae	g__Clostridium sensu stricto 1	s__Clostridium sp. Marseille-P2414
ASV010682	A809585	0.001	11.8.2020	2020	Breeding	Finland	Hanko	59.8283	22.9659	Male	Young	k__Bacteria	p__Campylobacterota	c__Campylobacteria	o__Campylobacterales	f__Helicobacteraceae	g__Helicobacter	s__Helicobacter sp. 'B52D Seymour'
ASV010726	A686081	0.001	24.9.2020	2020	Autumn	Finland	Karjaa	60.0715	23.662	Male	Young	k__Bacteria	p__Firmicutes	c__Bacilli	o__Lactobacillales	f__Streptococcaceae	g__Streptococcus	s__Streptococcus mutans
ASV010752	A810983	0.001	23.3.2021	2021	Spring	Finland	Hanko	59.8283	22.9659	Male	Adult	k__Bacteria	p__Campylobacterota	c__Campylobacteria	o__Campylobacterales	f__Campylobacteraceae	g__Campylobacter	s__Campylobacter jejuni
ASV010872	A810988	0.001	24.3.2021	2021	Spring	Finland	Hanko	59.8283	22.9659	Male	Adult	k__Bacteria	p__Firmicutes	c__Bacilli	o__Mycoplasmatales	f__Mycoplasmataceae	g__Ureaplasma	s__
ASV010915	A810920	0.001	12.8.2020	2020	Breeding	Finland	Hanko	59.8283	22.9659	Male	Young	k__Bacteria	p__Firmicutes	c__Bacilli	o__Mycoplasmatales	f__Mycoplasmataceae	g__Mycoplasma	s__Mycoplasma penetrans HF-2
ASV010927	1_denmark	0.001	11.7.2020	2020	Breeding	Denmark	Svendborg	55.0557	Oct.31	Male	Adult	k__Bacteria	p__Firmicutes	c__Clostridia	o__Clostridiales	f__Clostridiaceae	g__Clostridium sensu stricto 1	s__Clostridium baratii str. Sullivan
ASV010944	LV18	0.001	19.9.2020	2020	Autumn	Latvia	Pape	56.1625	21.0656	Female	Adult	k__Bacteria	p__Proteobacteria	c__Gammaproteobacteria	o__Legionellales	f__Legionellaceae	g__Legionella	s__Legionella massiliensis
ASV010956	A686080	0.001	23.9.2020	2020	Autumn	Finland	Karjaa	60.0715	23.662	Male	Young	k__Bacteria	p__Proteobacteria	c__Gammaproteobacteria	o__Enterobacterales	f__Enterobacteriaceae	g__Escherichia-Shigella	s__Escherichia coli
ASV010993	A810987	0.001	24.3.2021	2021	Spring	Finland	Hanko	59.8283	22.9659	Male	Adult	k__Bacteria	p__Firmicutes	c__Clostridia	o__Clostridiales	f__Clostridiaceae	g__Clostridium sensu stricto 1	s__
ASV011061	7_denmark	0.001	21.7.2020	2020	Breeding	Denmark	Svendborg	55.0557	Oct.31	Female	Adult	k__Bacteria	p__Firmicutes	c__Clostridia	o__Clostridiales	f__Clostridiaceae	g__Clostridium sensu stricto 3	s__
ASV011207	LV09	0.001	17.9.2020	2020	Autumn	Latvia	Pape	56.1625	21.0656	Male	Young	k__Bacteria	p__Firmicutes	c__Bacilli	o__Lactobacillales	f__Enterococcaceae	g__Enterococcus	s__Enterococcus cecorum
ASV011244	D28	0.001	31.5.2021	2021	Breeding	France	Chize forest	46.1201	0.4585	Male	Unknown	k__Bacteria	p__Firmicutes	c__Bacilli	o__Mycoplasmatales	f__Mycoplasmataceae	g__Mycoplasma	s__Malacoplasma microti
ASV011315	14_denmark	0.001	20.9.2020	2020	Autumn	Denmark	Hjulby	55.3422	Oct.66	Male	Young	k__Bacteria	p__Firmicutes	c__Bacilli	o__Bacillales	f__Bacillaceae	g__Bacillus	s__
ASV011352	7_vantaa	0.001	2.9.2020	2020	Breeding	Finland	Lansinnatus	60.249	25.118	Male	Young	k__Bacteria	p__Actinobacteriota	c__Actinobacteria	o__Corynebacteriales	f__Mycobacteriaceae	g__Mycobacterium	s__
ASV011357	7_denmark	0.001	21.7.2020	2020	Breeding	Denmark	Svendborg	55.0557	Oct.31	Female	Adult	k__Bacteria	p__Actinobacteriota	c__Actinobacteria	o__Actinomycetales	f__Actinomycetaceae	g__Actinomyces	s__
ASV011372	A686080	0.001	23.9.2020	2020	Autumn	Finland	Karjaa	60.0715	23.662	Male	Young	k__Bacteria	p__Actinobacteriota	c__Actinobacteria	o__Corynebacteriales	f__Mycobacteriaceae	g__Mycobacterium	s__
ASV011391	D28	0.001	31.5.2021	2021	Breeding	France	Chize forest	46.1201	0.4585	Male	Unknown	k__Bacteria	p__Campylobacterota	c__Campylobacteria	o__Campylobacterales	f__Campylobacteraceae	g__Campylobacter	s__Campylobacter sp. RM16704
ASV011391	D26	0.001	20.5.2021	2021	Breeding	France	Chize forest	46.0979	0.4134	Female	Unknown	k__Bacteria	p__Campylobacterota	c__Campylobacteria	o__Campylobacterales	f__Campylobacteraceae	g__Campylobacter	s__Campylobacter sp. RM16704
ASV011391	9_chize	0.001	20.5.2021	2021	Breeding	France	Chize forest	46.1523	0.437	Male	Unknown	k__Bacteria	p__Campylobacterota	c__Campylobacteria	o__Campylobacterales	f__Campylobacteraceae	g__Campylobacter	s__Campylobacter sp. RM16704
ASV011433	14_denmark	0.001	20.9.2020	2020	Autumn	Denmark	Hjulby	55.3422	Oct.66	Male	Young	k__Bacteria	p__Firmicutes	c__Bacilli	o__Bacillales	f__Bacillaceae	g__Bacillus	s__Bacillus arbutinivorans
ASV011466	1_denmark	0.001	11.7.2020	2020	Breeding	Denmark	Svendborg	55.0557	Oct.31	Male	Adult	k__Bacteria	p__Proteobacteria	c__Gammaproteobacteria	o__Enterobacterales	f__Enterobacteriaceae	g__Escherichia-Shigella	s__Escherichia marmotae
ASV011466	LV18	0.001	19.9.2020	2020	Autumn	Latvia	Pape	56.1625	21.0656	Female	Adult	k__Bacteria	p__Proteobacteria	c__Gammaproteobacteria	o__Enterobacterales	f__Enterobacteriaceae	g__Escherichia-Shigella	s__Escherichia marmotae
ASV011482	A810987	0.001	24.3.2021	2021	Spring	Finland	Hanko	59.8283	22.9659	Male	Adult	k__Bacteria	p__Actinobacteriota	c__Actinobacteria	o__Corynebacteriales	f__Mycobacteriaceae	g__Mycobacterium	s__
[truncated: 5,473 more rows]

## Sheet: 37_mallard_pathogen_asv_relab
ASV ID	Sample ID	Relative abundance	Date	Year	Season	Country	Site_name	Latitude	Longitude	Gender	Age	Kingdom	Phylum	Class	Order	Family	Genus	Species
[truncated: 9,798 more rows]

[truncated: 2 more sheets: 38_wood_pathogen_asv_relab, 39_bat_pathogen_asv_relab]
